# Supplementary material for: Transcriptome Analysis Reveals Photoperiod-Associated Genes Expressed in Rice Anthers
Source: Front Plant Sci. 2021 Feb 26;12:621561. doi: 10.3389/fpls.2021.621561 (PMC7953911; doi:10.3389/fpls.2021.621561)
Supplement: Supplementary file 7 [file Data_Sheet_5.XLSX]

## Sheet: DGE_transport
Gene		SD8	SD12	SD16	SD20	SD24	SD4	LD8	LD12	LD16	LD20	LD24	LD4
LOC_Os03g25920	amino acid permease family protein, putative, expressed	22.378	5.80755	37.2489	33.3739	26.5008	18.7321	57.1523	42.1224	53.5365	37.4137	49.547	60.6762
LOC_Os03g25930	emp24/gp25L/p24 family protein, putative, expressed	12.0961	4.93492	14.2353	8.8909	13.5939	11.4711	22.5659	24.6351	13.4233	19.7582	15.4688	11.9986
LOC_Os03g09970	sulfate transporter, putative, expressed	0.122177	0.817773	0.102547	0.127745	0.18583	0.234851	0.116832	0.176944	0.0813183	0.121778	0.0834842	0.0853489
LOC_Os03g09940	sulfate transporter, putative, expressed	42.393	7.89752	30.3134	42.3003	41.1458	44.7996	21.5019	17.359	19.8298	17.4139	17.2717	27.9344
LOC_Os06g43660	OVP1	92.4967	178.668	98.1081	109.214	96.6605	86.1363	56.2293	51.3547	105.876	67.919	59.8677	65.3787
LOC_Os03g17070	ATP synthase B chain, chloroplast precursor, putative, expressed	17.4686	25.5975	20.8907	14.7468	10.6411	4.65414	20.6159	8.49222	14.0303	11.9793	14.9501	17.0399
LOC_Os04g38220	transporter family protein, putative, expressed	13.4566	10.5168	23.1275	14.659	12.8047	8.27809	28.0298	16.5952	24.5934	19.5905	18.9627	30.7753
LOC_Os03g25869	amino acid permease family protein, putative, expressed	1.17813	1.31335	1.27812	1.19537	0.826202	0.614273	1.05879	0.483166	1.86541	1.40356	1.35934	1.81767
LOC_Os06g04450	Sec1 family transport protein, putative, expressed	6.17549	2.21837	8.17418	6.79741	8.26454	11.7354	51.0693	38.643	20.8535	26.3282	28.1972	16.9079
LOC_Os12g39080	OsPUT2	2.50593	6.17048	7.09127	3.32099	2.59218	1.33487	3.09135	2.31683	4.19292	2.91192	3.63908	3.6887
LOC_Os02g21650	prefoldin, putative, expressed	19.865	11.2581	20.0574	15.4704	19.1861	19.0629	19.9411	20.4216	16.1037	21.6389	16.7336	15.2633
LOC_Os11g02950	auxin efflux carrier component, putative, expressed	1.73316	0.055837	5.41823	4.45439	6.38655	5.49989	14.6151	16.1064	11.5715	19.9986	14.1103	6.30629
LOC_Os06g08860	transporter family protein, putative, expressed	11.516	10.22	10.7355	10.0999	11.5401	11.2122	19.5713	18.1383	12.8321	18.0522	18.5064	14.6882
LOC_Os03g09870	mitochondrial import inner membrane translocase subunit Tim17, putative, expressed	53.3878	33.3466	55.731	39.9685	54.1927	61.0082	56.5038	57.9258	40.0454	62.7763	52.0202	36.3667
LOC_Os12g02340	LTPL14 - Protease inhibitor/seed storage/LTP family protein precursor, expressed	734.801	205.85	1183.19	1468.26	1182.66	1098.26	2445.62	1928.68	3053.74	3092.28	3599.9	3370.9
LOC_Os12g02330	LTPL13 - Protease inhibitor/seed storage/LTP family protein precursor, expressed	26.1588	53.061	106.182	25.795	55.633	24.1625	23.4454	32.247	67.9579	76.1397	167.046	100.283
LOC_Os12g02320	LTPL12 - Protease inhibitor/seed storage/LTP family protein precursor, expressed	212.818	439.488	322.232	172.356	167.947	129.838	354.853	206.357	313.904	249.049	391.379	584.293
LOC_Os12g02310	LTPL11 - Protease inhibitor/seed storage/LTP family protein precursor, expressed	65.8842	110.835	71.7416	48.5544	45.404	23.3752	49.9352	37.9438	31.8892	16.8452	14.8348	26.5955
LOC_Os12g02300	LTPL26 - Protease inhibitor/seed storage/LTP family protein precursor, expressed	50.195	64.7565	18.725	9.65705	27.6954	17.843	6.31252	5.64941	8.45149	8.34288	8.22981	21.078
LOC_Os02g21750	MDR-like ABC transporter, putative, expressed	30.7302	5.75279	44.4388	29.0913	41.771	40.1138	94.3381	111.858	56.508	72.1703	64.2489	41.8216
LOC_Os03g52660	ATP synthase F1, delta subunit family protein, putative, expressed	7.29909	12.0269	7.00437	4.17137	3.8205	3.44562	6.74856	2.92464	5.20364	3.07797	4.90976	4.57312
LOC_Os03g52650	OsKNOLLE	7.38335	2.14267	7.382	2.90174	4.76963	4.30617	3.4602	3.48885	2.79792	3.67109	3.91003	1.88355
LOC_Os06g08900	glutamate receptor 2.6 precursor, putative, expressed	0.152761	0.0846348	0.357706	0.238782	0.123755	0.26411	0.324838	0.457177	0.314487	0.426652	0.223561	0.124196
LOC_Os10g28440	sulfate transporter 3.1, putative, expressed	0.268227	0.589382	0.342463	0.230253	0.24019	0.264862	0.0185752	0.049566	0.261687	0.100091	0.0182303	0.0515115
LOC_Os07g27940	LTPL27 - Protease inhibitor/seed storage/LTP family protein precursor, putative, expressed	2.292	0	3.81905	2.1036	1.4643	1.74259	3.28246	2.19054	3.69391	1.4702	1.96068	3.14364
LOC_Os08g44870	MATE efflux family protein, putative, expressed	5.08886	6.24529	5.68744	4.44147	5.66151	4.79503	5.47998	1.87087	5.76888	6.62164	13.5516	18.5404
LOC_Os03g13274	NRT1|OsNRT1|OsNRT1.1	5.71034	9.86286	4.9499	6.39595	6.5043	5.91819	3.58243	2.27272	5.27626	5.9756	3.71119	4.6606
LOC_Os03g05290	aquaporin protein, putative, expressed	160.207	330.845	326.016	225.394	192.464	123.582	255.257	230.504	310.239	208.357	271.642	373.078
LOC_Os06g39875	ras-related protein, putative, expressed	103.861	46.6167	106.559	65.6616	100.412	125.299	66.3114	80.8693	50.872	69.1483	55.8145	46.606
LOC_Os10g23100	ras-related protein, putative, expressed	87.1011	97.902	72.5399	71.7929	77.6126	80.4533	46.8887	33.5512	59.1228	64.1403	62.3344	67.7197
LOC_Os04g44540	mitochondrial carrier protein, putative, expressed	12.0774	6.21622	11.3533	13.3138	17.3574	20.3992	13.155	18.8723	11.8688	16.2711	10.2283	8.84094
LOC_Os01g49650	LTPL150 - Protease inhibitor/seed storage/LTP family protein precursor, expressed	20.2314	13.0219	13.5324	8.27788	23.7698	11.4725	3.17534	1.82178	4.61677	3.69565	5.17974	5.43727
LOC_Os06g43600	LTPL129 - Protease inhibitor/seed storage/LTP family protein precursor, expressed	5.27857	10.8604	5.75725	2.81669	5.93086	3.31498	4.60781	1.40659	4.11236	3.22212	4.97076	2.92373
LOC_Os04g38570	OsABCB14	5.7268	9.779	6.80537	7.87931	7.8163	6.2952	6.1682	3.58521	10.4702	7.65782	10.3145	9.98167
LOC_Os12g39180	natural resistance-associated macrophage protein, putative, expressed	14.4467	10.1267	15.5223	16.6443	15.7193	14.3251	23.757	19.0992	18.5548	18.1059	16.5906	13.4014
LOC_Os07g32880	ATP synthase gamma chain, putative, expressed	61.9072	61.8327	53.0214	48.7766	45.8224	37.6778	28.2181	15.2883	34.5907	25.6352	26.8734	39.3206
LOC_Os10g28240	calcium-transporting ATPase, plasma membrane-type, putative, expressed	1.16625	2.6585	2.68025	1.62163	1.65809	1.41279	1.90871	14.3832	2.51559	2.39285	2.43887	1.82675
LOC_Os04g44430	transporter, major facilitator family, putative, expressed	23.4079	34.3676	23.6575	27.8286	23.4251	22.7622	12.6379	12.5682	22.4609	20.8376	19.0523	17.8685
LOC_Os09g37300	transporter, monovalent cation:proton antiporter-2 family, putative, expressed	0.189335	0.185205	0.143153	0.211603	0.169015	0.162845	1.98092	1.46857	0.72187	0.602611	1.36462	1.17647
LOC_Os03g46470	OsIRT1	0.893002	1.42741	0.683163	0.512039	0.456076	0.295495	0.899276	0.571009	0.672327	0.898072	0.82743	1.03583
LOC_Os11g02424	LTPL9 - Protease inhibitor/seed storage/LTP family protein precursor, expressed	199.564	83.5215	375.5	370.849	280.281	228.389	617.604	541.519	964.925	874.023	1185.61	980.908
LOC_Os11g02400	LTPL8 - Protease inhibitor/seed storage/LTP family protein precursor, expressed	449.359	408.726	478.315	418.219	346.681	295.048	644.69	444.697	590.606	503.885	667.148	741.548
LOC_Os04g44300	OsYSL13	0.418382	0.44382	0.73959	0.720912	0.617381	0.870745	0.792048	0.870645	0.594842	0.945253	0.707779	0.606994
LOC_Os04g44330	transposon protein, putative, unclassified, expressed	30.6836	28.3039	27.4387	20.2111	26.1662	28.9422	18.4269	21.6507	13.8023	20.788	14.775	11.5408
LOC_Os04g44320	OsYSL12	0.194196	0.642898	0.444879	1.063	0.638169	0.584792	0.740655	0.156839	0.466397	0.8082	1.3725	1.36296
LOC_Os12g39420	nucleobase-ascorbate transporter, putative, expressed	22.5484	26.6509	22.137	28.5362	25.0251	26.7801	18.3726	9.04365	21.1116	19.5811	24.3819	24.3882
LOC_Os07g09010	nodulin, putative, expressed	9.73876	13.2847	8.40644	8.00297	9.33836	7.10769	5.5092	3.94022	9.02327	5.47506	4.72685	6.80811
LOC_Os03g05610	OsPht1;12|OsPT12	63.1962	21.6222	99.1479	99.3314	74.1162	61.4154	105.841	77.1885	115.938	78.2893	121.929	133.161
LOC_Os01g71700	amino acid permease family protein, putative, expressed	0.0772607	0.372594	0.0791795	0.0517407	0	0.0530322	0.0412954	0.0235988	0.0502305	0.0494381	0.0747997	0
LOC_Os01g71740	amino acid permease family protein, putative, expressed	2.83075	2.88348	3.69576	2.21529	2.29652	1.30063	2.08474	0.855701	2.5016	2.21795	4.19848	2.62309
LOC_Os03g05620	OsPht1;1|OsPT1	18.4277	31.9109	17.2629	20.2828	20.0072	13.0361	13.9904	16.1619	20.1377	19.5438	19.2145	26.0966
LOC_Os03g46150	LTPL72 - Protease inhibitor/seed storage/LTP family protein precursor, expressed	0.224483	0.848809	0.245653	0.113386	0.22244	0.0401522	0.0257066	0	0.0687308	0.0233943	0	0.0500045
LOC_Os04g51830	OsHKT1;4	0.433812	0.994138	0.431127	0.711168	0.376675	0.385647	5.48257	3.68569	2.21355	2.10126	2.74816	1.61518
LOC_Os04g51820	OsHKT1;1|OsHKT4	1.98434	4.13691	1.16684	2.29626	1.98344	2.68839	1.4032	0.782284	0.801406	0.699832	0.91721	2.01067
LOC_Os07g48130	potassium transporter, putative, expressed	6.76064	14.5473	9.08646	8.54318	7.85805	6.72304	4.01703	1.5643	7.75968	6.29779	8.13969	9.51408
LOC_Os03g05750	heavy-metal-associated domain-containing protein, putative, expressed	13.8197	18.5048	13.6926	10.2428	9.35242	7.82988	7.80454	57.47	12.1571	9.07834	8.69155	11.8053
LOC_Os01g13710	transposon protein, putative, unclassified, expressed	0.0650747	0.151521	0.0404288	0.0259537	0.0399371	0.0306592	6.40167	3.13792	1.51196	1.25893	3.30332	1.50484
LOC_Os01g13770	OsTPT1	52.276	97.1296	67.5236	67.5216	51.2532	42.4485	36.4311	37.6298	62.3446	41.2502	38.4448	37.2927
LOC_Os12g41890	amino acid permease family protein, putative, expressed	8.56086	3.55369	12.8539	6.24955	8.33253	6.36105	8.36121	20.7365	9.65243	8.18775	5.19344	3.98423
LOC_Os05g14240	aquaporin protein, putative, expressed	18.5254	75.4907	91.7094	32.0437	26.6966	12.7186	16.3841	17.543	30.4648	25.836	30.9995	24.7989
LOC_Os12g25200	chloride transporter, chloride channel family, putative, expressed	0.609642	1.25178	0.647634	1.1536	0.911635	0.657313	1.0161	0.603599	0.687106	1.12891	1.52943	2.29628
LOC_Os10g40614	LTPL147 - Protease inhibitor/seed storage/LTP family protein precursor, expressed	0.69963	1.7554	0.977471	0.369483	0.739557	0.301485	0.887517	0.183987	0.679893	0.552075	0.67968	0.4101
LOC_Os03g17800	phosphatidylinositol transfer protein alpha isoform, putative, expressed	1.07907	1.53187	0.781696	1.29158	0.761526	1.35006	1.40637	0.953114	0.910794	1.39049	1.49827	2.93884
LOC_Os05g47700	LTPL152 - Protease inhibitor/seed storage/LTP family protein precursor, expressed	32.5898	35.3179	37.4027	18.1137	25.7257	17.7499	113.181	43.7038	78.4457	71.0042	83.872	90.3709
LOC_Os01g13160	expressed protein	35.5302	26.7785	28.2353	39.2316	39.8383	44.0282	46.9815	53.2231	40.2967	44.3124	33.6674	34.2219
LOC_Os08g08070	OsMST5	0.306905	0.278495	2.47992	0.529527	0.472555	1.14562	51.2673	38.5055	12.3154	12.5531	21.2737	17.7914
LOC_Os02g38020	inorganic phosphate transporter 2-1, chloroplast precursor, putative, expressed	16.8756	13.8946	7.99476	11.8809	12.2412	14.167	4.87795	1.74764	5.49025	4.32604	5.08286	10.6976
LOC_Os01g13120	aquaporin protein, putative, expressed	21.595	8.22673	31.21	31.3737	28.1171	19.6669	26.837	9.22819	29.5493	33.6301	44.1063	45.6714
LOC_Os01g13130	aquaporin protein, putative, expressed	11.8562	10.5195	17.7219	33.5019	23.5972	20.8374	30.824	18.8982	38.167	41.9716	49.7085	47.6469
LOC_Os07g09340	plasma membrane ATPase, putative, expressed	141.463	167.324	120.954	133.246	124.525	144.578	69.7017	51.6535	109.181	95.3034	120.722	154.119
LOC_Os10g11354	MATE efflux family protein, putative, expressed	10.9631	19.3091	8.33626	11.205	10.9728	11.0954	2.86815	2.75339	6.68351	6.3429	8.63753	11.3953
LOC_Os10g40950	polyol transporter 5, putative, expressed	0.085435	0.177462	0.111607	0.0920904	0.0695132	0.0377556	0.973174	0.717347	0.473401	0.200352	1.12018	0.681016
LOC_Os01g05800	inner membrane protein, putative, expressed	11.9713	17.0302	9.46501	12.2203	9.61566	9.42017	6.84724	5.30285	10.9052	8.6146	7.85483	9.69827
LOC_Os05g47980	ATP synthase, putative, expressed	247.648	213.371	252.504	269.865	309.044	344.116	405.408	527.232	344.847	379.048	343.517	288.74
LOC_Os03g58940	LTPL83 - Protease inhibitor/seed storage/LTP family protein precursor, putative, expressed	52.7824	25.8401	47.636	66.9906	65.2989	64.0028	156.966	51.6169	113.839	121.783	151.873	192.534
LOC_Os03g25470	ctr copper transporter family protein, putative, expressed	0.828977	0.791992	1.69238	1.77273	1.7619	0.355149	1.41283	0.66788	2.01122	2.50732	2.43795	2.26533
LOC_Os01g49120	MATE efflux family protein, putative, expressed	1.13785	1.88011	1.15702	1.10701	1.32373	1.36093	0.93626	0.599021	0.946429	1.45359	1.74114	2.09064
LOC_Os05g34010	peptide transporter PTR2, putative, expressed	0.51117	1.00699	0.875042	1.0759	0.741223	0.361117	0.072579	0.0361669	0.523938	0.457851	0.569251	0.494905
LOC_Os05g01480	ras-related protein, putative, expressed	47.407	57.1433	46.7409	40.5448	41.9502	39.5297	17.7422	15.0452	31.2944	32.8839	35.7187	39.417
LOC_Os01g18670	MDR-like ABC transporter, putative, expressed	86.0998	134.423	59.8019	116.596	106.592	102.845	23.4922	15.2306	59.9108	48.2921	40.4212	63.7481
LOC_Os07g01070	peptide transporter, putative, expressed	1.58601	3.22152	1.97228	1.46401	0.975319	0.759397	0.736885	1.11535	1.35183	0.747039	0.771856	0.927756
LOC_Os10g11860	MATE efflux family protein, putative, expressed	3.64533	5.34045	2.81225	3.18157	2.69694	3.32376	1.40166	1.08352	1.58529	1.68022	2.12366	1.40375
LOC_Os04g42350	heavy metal-associated domain containing protein, expressed	0	0.0958112	0	0	0	0	5.53186	2.65693	1.3128	1.08327	1.65285	1.17817
LOC_Os03g25610	heavy metal-associated domain containing protein, expressed	1.3756	2.1179	1.78891	1.7376	1.45773	0.613181	0.432286	0.432223	1.45921	1.98095	2.24161	2.53914
LOC_Os07g05640	transporter family protein, putative, expressed	17.0295	25.0366	22.3338	23.5781	17.6941	14.291	10.7072	4.85089	14.9151	13.0974	18.0205	23.5602
LOC_Os09g31130	citrate transporter, putative, expressed	14.7432	33.6698	14.6201	11.4544	11.3337	10.0764	3.21254	3.23427	8.26524	6.63569	6.07996	12.5117
LOC_Os01g25386	multidrug resistance-associated protein, putative, expressed	23.5255	40.6654	21.5805	21.5156	18.1908	19.1396	20.2972	14.7043	30.8318	19.4482	25.3863	37.7261
LOC_Os03g13750	erwinia induced protein 2, putative, expressed	69.4213	49.33	56.5317	58.7561	67.9852	78.3725	66.7382	86.2438	55.7347	73.0088	66.204	63.9179
LOC_Os09g17840	protein transport protein Sec61 subunit alpha, putative, expressed	54.7746	37.383	56.5336	49.7752	57.4307	65.6974	73.9298	77.0472	59.0996	68.6769	70.0141	52.1081
LOC_Os04g42500	trafficking protein particle complex subunit, putative, expressed	36.6617	18.8617	27.3488	34.1194	43.7116	47.6164	37.5223	46.9743	33.0715	47.2787	37.4424	26.5805
LOC_Os01g49190	ATP synthase, putative, expressed	366.511	322.104	371.806	312.79	328.728	335.296	567.684	618.607	470.272	469.601	476.092	411.143
LOC_Os07g01214	transposon protein, putative, unclassified, expressed	4.65586	10.1645	3.55358	4.13201	4.41489	2.57699	2.12261	1.71859	1.68068	2.11481	1.71254	3.69224
LOC_Os08g37432	MATE efflux family protein, putative, expressed	3.30739	3.54042	3.54072	4.07529	3.51284	3.14248	2.92993	1.18971	4.34691	4.14814	7.705	7.66006
LOC_Os07g40320	vesicle transport protein GOT1B, putative, expressed	2.7432	3.30524	2.34713	1.96291	2.24755	2.18353	3.65811	5.57078	2.69798	2.59859	2.32739	3.49641
LOC_Os04g55800	OsSULTR3;3	4.40595	5.44098	4.70191	5.19223	4.58092	3.86165	1.09318	1.41866	5.66479	4.74985	2.17232	2.24079
LOC_Os12g06570	cyclic nucleotide-gated ion channel, putative, expressed	1.78219	0.401025	3.55368	1.93507	2.96122	2.23192	12.9641	12.5821	6.12185	6.79526	8.21977	5.6054
LOC_Os09g20500	transporter, putative, expressed	1.41169	1.91111	1.22713	1.04346	1.24101	1.06045	1.00329	0.649592	1.0091	1.14783	1.09347	1.10589
LOC_Os10g39790	CorA-like magnesium transporter protein, putative, expressed	22.722	18.8842	23.2963	22.383	22.5894	22.4308	35.1736	32.3	25.1984	30.5607	26.8596	23.6014
LOC_Os08g37370	mitochondrial carrier protein, putative, expressed	52.0094	79.0754	52.905	46.5039	51.4053	42.1385	67.2563	120.311	60.5776	63.6111	82.1329	105.104
LOC_Os07g44040	ras-related protein, putative, expressed	22.5773	24.1336	17.3214	20.7774	20.3132	20.3173	11.3215	8.42622	17.9105	16.4046	14.1657	18.0948
LOC_Os04g18030	Sec1 family transport protein, putative, expressed	6.77788	4.79338	6.2325	7.1109	7.56768	9.50116	7.33212	9.98243	8.15522	9.06557	6.15096	6.44466
LOC_Os09g24924	transporter family protein, putative, expressed	6.89196	9.99525	7.60994	8.37812	8.06239	7.35812	9.82646	3.85064	7.3522	6.12123	7.54865	11.8242
LOC_Os06g12610	OsPIN1a	0.75968	2.21092	1.10983	0.912609	0.749822	1.22555	2.00056	0.487511	0.721628	0.992184	1.00272	1.30573
LOC_Os02g06540	transporter family protein, putative, expressed	1.08506	0.446695	1.31653	0.763123	0.800232	0.961015	19.3719	12.5136	4.81574	4.47039	6.1564	5.10244
LOC_Os02g06530	armadillo/beta-catenin repeat family protein, putative, expressed	0.461597	0.76308	0.554322	0.897604	1.11217	0.815127	1.50224	3.88377	2.76497	1.32562	0.673847	1.03085
LOC_Os05g06480	Chalk5	17.7238	11.0876	12.2544	10.5845	8.65475	10.4377	7.4814	5.86686	7.64515	6.20592	4.24019	9.01367
LOC_Os07g16970	rab GDP dissociation inhibitor alpha, putative, expressed	46.5924	11.4619	50.5812	52.8496	68.8344	81.9621	109.008	143.798	61.532	94.2836	70.8462	54.4674
LOC_Os10g31040	Citrate transporter protein, putative, expressed	30.6795	43.2208	23.9725	25.7917	25.9476	17.9518	17.1034	14.9942	18.2996	16.6714	14.4433	20.2028
LOC_Os09g31478	auxin efflux carrier component, putative, expressed	7.3077	12.0289	6.45424	5.81845	7.22666	6.85248	3.95611	2.72405	3.15214	4.35362	5.38398	6.45326
LOC_Os06g12310	Lsi6	22.5913	31.0215	16.2825	23.8686	23.0984	12.348	14.358	4.18242	9.94958	24.6417	29.191	33.5265
LOC_Os12g06840	ATEXO70C2, putative, expressed	0.468418	0.426184	2.78086	0.898622	2.10935	1.57037	16.2949	17.2301	6.66657	8.06861	9.35786	7.05021
LOC_Os09g20480	transporter, putative, expressed	5.14019	0.94775	14.828	7.93406	12.1562	8.91073	34.7559	29.1664	16.4511	23.4435	23.278	12.2135
LOC_Os09g12590	transporter family protein, putative, expressed	0.547484	0.553765	0.804417	0.471378	0.366055	0.422513	0.0642344	0.0330413	0.144865	0.134101	0.0518956	0.263015
LOC_Os05g39560	OsZIP5	9.01151	15.6519	10.5304	10.3367	8.63669	6.09524	2.85891	2.35996	7.21507	6.66497	3.8256	4.61981
LOC_Os05g39600	ATCHX15, putative, expressed	0.0321151	0.107258	0.133477	0.0320451	0.0888224	0.0919659	6.82429	5.85888	2.62427	2.13639	2.86649	2.15004
LOC_Os03g21490	ABC transporter, ATP-binding protein, putative, expressed	20.1442	15.5432	23.739	14.6626	18.3432	19.012	27.9994	27.7976	18.086	24.1433	24.9201	18.252
LOC_Os06g12440	LTPL60 - Protease inhibitor/seed storage/LTP family protein precursor, putative, expressed	0.471614	4.50016	0.734837	0.526079	0.575464	0.619698	0.035191	0	0	0.0675018	0	0
LOC_Os05g02060	mitochondrial import inner membrane translocase subunit Tim17, putative, expressed	55.4182	42.5793	68.2877	36.7934	61.2506	53.6664	118.973	134.344	92.2182	109.015	95.2885	61.316
LOC_Os01g38680	OsMST7	45.308	108.62	37.393	26.7729	33.674	37.495	2.24323	3.26902	3.87475	4.59469	1.53533	4.86343
LOC_Os05g02050	mitochondrial import inner membrane translocase subunit Tim, putative, expressed	59.8083	45.3346	69.2925	72.6525	75.7925	59.2874	25.3556	20.1606	25.574	25.5626	33.2289	29.7968
LOC_Os01g38670	OsMST8	233.535	116.362	236.911	120.888	160.925	163.916	137.29	98.2573	65.2547	91.5513	77.9896	72.9267
LOC_Os05g43820	ras-related protein, putative, expressed	5.51989	6.25949	3.67736	4.14601	3.69478	3.28586	1.08002	1.02682	2.14834	2.45161	2.32056	3.16243
LOC_Os03g30550	RNA-binding protein-like, putative, expressed	34.2656	20.3149	32.6408	29.3197	34.688	39.453	42.6488	47.6277	30.5998	40.9939	34.7137	26.997
LOC_Os01g45550	OsPIN3t	5.60836	11.5331	5.04071	4.68913	4.15966	3.47879	7.6062	4.87731	5.45792	6.03538	6.049	9.00197
LOC_Os12g06060	amino acid permease family protein, putative, expressed	28.8459	27.6606	44.943	40.5648	31.3047	26.6154	49.2984	40.9196	61.0686	38.5782	49.1403	52.9487
LOC_Os08g41590	peptide transporter PTR2, putative, expressed	0.451287	1.18263	0.61897	0.619402	0.555112	0.377391	0.329681	0.126946	0.242819	0.144904	0.106049	0.470849
LOC_Os08g10550	potassium transporter, putative, expressed	23.0659	23.5786	18.8769	24.4023	25.6571	28.0693	13.0801	8.28095	15.9881	14.4689	14.9837	18.1965
LOC_Os02g41860	aquaporin protein, putative, expressed	84.3578	59.2889	103.46	108.55	87.2077	83.1925	173.724	93.3413	186.146	156.316	322.766	381.674
LOC_Os07g37130	FUR1, putative, expressed	1.57847	1.00373	3.83039	5.4979	3.26733	3.35922	5.16623	1.85128	3.57037	2.84712	4.67232	5.42437
LOC_Os07g37100	OsENT2	88.502	85.8046	58.2242	56.3652	57.4723	82.5607	28.9492	26.6886	23.5122	28.2029	23.7724	35.1577
LOC_Os08g02450	ATCHX, putative, expressed	0.696663	0.0991564	1.97191	0.662455	1.03985	1.00312	6.69137	7.0618	3.06139	3.78984	3.55418	3.04615
LOC_Os04g49890	multidrug resistance-associated protein, putative, expressed	8.6366	10.1755	6.12278	9.62634	9.26963	11.4172	16.3761	9.75965	10.6185	10.4473	7.75254	8.52334
LOC_Os12g06270	retrotransposon protein, putative, unclassified, expressed	2.93274	1.58863	4.24861	3.67862	4.57563	5.4917	9.72346	12.7008	6.63743	8.7811	6.46931	5.1478
LOC_Os02g02450	transposon protein, putative, unclassified, expressed	1.17872	1.64623	4.56951	1.2701	1.8322	4.77281	233.237	125.331	60.9002	60.1498	116.103	61.8678
LOC_Os03g16900	OsGDI3	65.993	8.84339	145.684	81.1637	145.79	205.656	723.761	792.659	310.872	461.468	465.137	271.609
LOC_Os02g02460	transposon protein, putative, unclassified, expressed	0.373812	0.205241	0.604099	0.312076	0.387528	0.384322	10.2283	9.38995	3.44495	2.67064	4.51674	3.41295
LOC_Os12g33946	cytochrome c oxidase subunit 1, putative, expressed	0.623764	0.397285	0.317641	0.538146	0.376452	0.405421	0.43816	0.992699	0.367294	0.99569	0.388892	0.122043
LOC_Os09g20000	heavy metal-associated domain containing protein, expressed	114.887	107.139	101.57	114.386	102.323	109.923	46.6482	55.4965	110.722	114.788	84.5118	94.0329
LOC_Os06g12090	OsSar1d	6.06821	12.9258	7.06662	2.57089	4.18595	4.7309	0.537825	0.590212	0.44372	1.1144	0.943848	1.18464
LOC_Os06g48810	OsHKT2;1|OsHKT1	1.14517	1.88806	0.672054	0.74405	1.03647	0.985315	0.145002	0.0114105	0.0719845	0.236105	0.217249	0.435422
LOC_Os03g60850	peptide transporter PTR2, putative, expressed	2.27818	5.57608	3.11365	2.77962	2.26838	1.7857	1.82623	0.943568	2.69289	2.28382	2.28059	2.85382
LOC_Os01g52200	mitochondrial ATP synthase g subunit family protein, putative, expressed	5.26023	15.4686	4.1862	2.39196	5.03833	4.56263	0.157351	0.200154	0.431219	0.545628	0.171222	0.151363
LOC_Os03g30220	mitochondrial import inner membrane translocase subunit Tim17, putative, expressed	1.354	0.696039	0.84729	0.621367	1.27228	1.6448	0.475613	0.659256	0.310702	0.664826	0.310195	0.214267
LOC_Os03g60880	nucleobase-ascorbate transporter, putative, expressed	5.3286	5.37899	5.57493	2.82379	3.52845	4.63287	2.20686	2.31426	1.68709	2.24443	2.29356	2.1884
LOC_Os10g39980	Lsi3	8.98451	13.0761	9.28204	14.1824	9.69106	7.71416	14.0242	4.41397	8.25497	9.0141	8.23526	7.98148
LOC_Os01g52130	sulfate transporter, putative, expressed	11.1731	6.66677	15.4247	10.8486	14.8492	17.068	44.5902	50.4337	22.7227	28.4165	26.1004	19.7759
LOC_Os01g01350	SNF7 domain containing protein, putative, expressed	13.8852	9.76245	12.7067	10.098	13.6517	14.3838	8.70168	7.54658	6.42702	10.7327	8.36703	7.33094
LOC_Os01g01360	peptide transporter PTR2, putative, expressed	1.27451	0.92119	1.20924	1.13986	1.03354	0.932912	1.09771	0.393787	0.891707	1.08746	1.0233	1.74876
LOC_Os03g21890	potassium transporter, putative, expressed	32.5884	50.0833	23.4833	30.1806	28.9964	27.1605	13.3577	8.30871	16.9425	15.8135	15.7729	25.4402
LOC_Os08g41720	OsPIN5b	1.29125	3.96001	1.10643	2.40284	1.67953	0.781134	2.12683	0.311139	0.524793	0.822516	0.899196	1.00648
LOC_Os06g39140	hemoglobin-like protein HbO, putative, expressed	23.795	28.4227	22.8222	14.687	19.4971	20.7377	30.6838	15.734	15.0033	19.813	27.6906	41.0016
LOC_Os01g69250	mitochondrial import receptor subunit TOM20, putative, expressed	64.9725	55.7407	86.0068	61.9873	76.165	58.2711	93.6007	93.1642	74.6061	100.081	85.9282	65.5705
LOC_Os01g40570	outer mitochondrial membrane porin, putative, expressed	109.415	62.8501	107.383	92.7536	111.868	128.325	163.348	171.907	104.059	145.733	137.756	109.874
LOC_Os12g01820	ATCHX, putative, expressed	0.0361848	0.00892782	0.00735395	0	0.0158189	0	0.830415	0.642811	0.165456	0.159307	0.230014	0.217469
LOC_Os02g45690	uncharacterized mscS family protein, putative, expressed	6.01194	6.61895	4.27648	7.9775	6.19763	7.70216	3.23402	2.53148	4.61256	4.92541	4.76371	5.81557
LOC_Os01g45990	OsAKT1	2.60364	3.20318	2.34652	3.00078	2.70059	3.04576	1.00575	1.66191	1.50086	1.95693	1.27057	1.93944
LOC_Os06g48630	ANTH/ENTH domain containing protein, putative, expressed	0.728207	0.621722	0.357494	0.512289	0.700548	0.834677	0.195649	0.549491	0.208642	0.332665	0.207784	0.115971
LOC_Os06g39260	OsUGT4	24.7593	16.9352	31.3165	20.0062	27.9031	28.0825	48.842	121.919	54.7744	45.9187	37.188	26.0581
LOC_Os02g45520	OsSPX-MFS2	4.00433	5.1867	5.51931	3.44031	4.26592	4.97339	9.64213	5.8852	4.58557	5.85122	7.17614	6.05146
LOC_Os08g45000	OsLPT1|OsPht1;6|OsPT6	1.00849	2.51494	0.911016	0.595245	0.89693	0.780754	0.230967	0.190042	0.674238	0.44461	0.558922	1.47005
LOC_Os08g45030	multidrug resistance protein, putative, expressed	3.98462	8.11788	4.23615	6.20518	3.75796	3.00882	3.88052	2.3179	6.30739	6.03703	4.98738	8.83375
LOC_Os02g02840	OsRacB	144.456	69.9025	146.807	175.633	216.656	261.392	287.652	392.257	211.944	313.94	215.012	156.522
LOC_Os11g02389	OsLTP5	69.0833	140.935	86.0475	63.3304	73.9473	75.7935	86.2084	84.5092	66.2333	82.559	130.448	143.392
LOC_Os11g02369	LTPL7 - Protease inhibitor/seed storage/LTP family protein precursor, expressed	87.6224	269.924	150.978	87.2696	91.2325	46.6959	83.0296	85.3723	86.0024	47.4127	34.7558	79.021
LOC_Os05g50140	auxin efflux carrier component, putative, expressed	3.44579	0.0435731	7.57651	4.17291	5.85316	5.05846	14.7064	16.0482	7.89737	10.9107	11.9843	7.84994
LOC_Os11g02350	LTPL25 - Protease inhibitor/seed storage/LTP family protein precursor, expressed	221.015	470.966	167.79	116.255	153.262	127.128	58.0999	42.8068	42.6253	42.1045	54.1806	108.121
LOC_Os06g22960	aquaporin protein, putative, expressed	82.1628	126.955	151.412	106.492	112.646	61.4465	262.276	213.268	124.716	144.368	178.765	132.876
LOC_Os05g27010	peptide transporter PTR3-A, putative, expressed	1.22598	2.30059	1.51941	1.67801	2.3224	1.28031	2.90231	2.03431	4.19563	3.92378	4.51547	5.28536
LOC_Os07g12890	OsZIP8	4.93333	5.85029	6.38479	5.89603	4.78673	3.98102	9.39325	9.30498	7.24564	7.81341	9.32973	9.82271
LOC_Os06g39050	syntaxin, putative, expressed	0.017519	0.0220717	0.0453603	0	0	0.0738574	5.69044	2.16597	1.13445	1.08532	2.27633	1.52754
LOC_Os11g06700	exo70 exocyst complex subunit, putative, expressed	2.74255	0.0228878	4.43746	1.81919	3.45345	2.89192	22.154	26.8258	11.7152	11.5329	12.1315	8.77466
LOC_Os01g71240	calcium-transporting ATPase, plasma membrane-type, putative, expressed	12.1622	5.10092	26.0558	12.0326	18.6036	18.2638	113.458	153.648	56.3567	59.7016	61.0624	46.2443
LOC_Os05g27304	peptide transporter PTR2, putative, expressed	1.08383	2.45358	1.20146	1.67275	1.22948	0.636896	0.321003	0.426062	0.918792	0.595588	0.391407	0.924786
LOC_Os05g50840	mitochondrial carrier protein, putative, expressed	63.4549	47.2242	68.1049	43.6156	51.9617	50.504	107.178	104.459	72.3145	85.7904	85.8783	65.2338
LOC_Os04g49220	mitochondrial import inner membrane translocase subunit Tim, putative, expressed	11.4672	5.97484	13.4577	7.41359	11.5346	11.3126	12.8637	14.9909	11.5141	15.9717	14.9914	10.0397
LOC_Os04g49260	heavy metal-associated domain containing protein, expressed	2.20619	6.19607	2.8084	0.655238	1.12159	0.394294	3.65774	0.942471	0.840867	1.35761	0.808993	0.940886
LOC_Os03g42830	MATE efflux family protein, putative, expressed	3.41097	3.83239	1.40143	2.07505	1.89938	2.32274	1.80884	0.735218	0.955664	1.05455	1.0948	2.60915
LOC_Os01g65210	proton-dependent oligopeptide transport, putative, expressed	6.32	8.35772	6.54595	10.4947	9.59499	7.03254	2.44312	1.41332	5.90547	6.10971	5.2572	5.18706
LOC_Os09g36930	OsPIP2;7	442.715	101.834	668.122	451.404	346.178	273.999	331.261	255.039	387.843	315.419	366.753	360.704
LOC_Os04g33930	LTPL103 - Protease inhibitor/seed storage/LTP family protein precursor, expressed	3802.59	416.519	3934.59	4231.23	3926.92	3709.4	3697.92	2179.51	3698.51	3520.06	3826.31	4252.49
LOC_Os04g33900	ctr copper transporter family protein, putative, expressed	3.05492	3.29559	4.99562	2.58452	3.5041	2.53009	4.98176	5.08376	4.5081	6.37864	3.63823	3.26671
LOC_Os01g65110	POT family protein, expressed	3.54764	5.34202	6.17933	5.34984	4.61761	4.34563	10.1813	6.01988	8.75658	7.72849	14.4052	17.4629
LOC_Os01g65100	peptide transporter, putative, expressed	33.1897	29.789	63.5551	39.1014	34.5328	24.5421	46.2857	31.9247	56.5095	38.3408	65.2329	65.5882
LOC_Os06g12790	ras-related protein, putative, expressed	87.7738	89.8836	60.9512	85.8989	90.3654	87.5906	14.5145	15.313	34.508	36.4655	30.4035	41.1774
LOC_Os04g55200	coatomer subunit epsilon, putative, expressed	16.9326	3.62608	28.2958	14.3438	24.1079	20.5451	85.8449	84.7581	39.1695	51.3286	61.3281	36.2155
LOC_Os01g65190	POT domain containing peptide transporter, putative, expressed	1.15152	1.62136	1.50399	1.21252	1.47447	0.687016	1.23926	0.397436	1.02195	1.18949	1.60907	1.15925
LOC_Os05g27530	ras-related protein, putative, expressed	10.7419	8.93226	9.19824	12.3122	12.1576	13.8964	13.651	15.9003	11.9637	11.3958	11.7337	12.0144
LOC_Os05g50654	mitochondrial import receptor subunit TOM7-1, putative, expressed	14.9919	13.1271	12.2245	12.5018	16.6148	19.7629	9.65666	9.66936	10.2891	13.0641	9.28875	8.27226
LOC_Os03g09230	LTPL69 - Protease inhibitor/seed storage/LTP family protein precursor, expressed	81.2127	32.1174	96.6301	63.1268	57.6232	51.1042	57.7947	27.0469	55.3705	51.8517	85.938	97.9486
LOC_Os04g38010	transporter family protein, putative, expressed	3.24107	3.41155	4.69148	4.94034	4.57185	2.63735	6.60782	5.6724	4.94315	5.33093	4.66072	3.22114
LOC_Os04g38026	transporter family protein, putative, expressed	45.6042	25.2177	98.9536	75.0263	75.5252	58.3199	125.253	90.9073	151.276	139.565	179.584	195.805
LOC_Os01g65000	ammonium transporter protein, putative, expressed	2.08013	1.35725	2.50988	1.55732	1.79153	1.55901	5.0375	5.25802	3.10837	3.28991	2.90307	3.27037
LOC_Os02g45380	MATE domain containing protein, expressed	0.0108464	0.0433224	0.0280837	0.0136783	0.0257247	0	0.329533	0.138922	0.0877217	0.0242917	0.138985	0.0513538
LOC_Os05g30640	leucine zipper protein-like, putative, expressed	1.77239	3.11144	1.43151	1.71554	1.64277	1.11387	0.287485	0.55083	1.03398	0.969918	0.753717	1.3101
LOC_Os05g30680	leucine zipper protein-like, putative, expressed	0.346424	1.44517	0.949208	0.66374	0.338139	0.494816	0.410496	0.267508	0.395999	0.495037	0.620009	0.605039
LOC_Os05g30660	leucine zipper protein-like, putative, expressed	0.235755	0.735484	0.405141	0.531789	0.300653	0.272226	0.211297	0.118388	0.511451	0.324719	0.476417	0.303031
LOC_Os07g31370	ras-related protein, putative, expressed	141.645	111.771	95.6169	177.5	190.641	193.383	182.643	234.35	171.639	210.627	122.739	123.387
LOC_Os11g18044	peptide transporter PTR2, putative, expressed	9.35601	16.3455	10.4456	9.91299	8.9727	7.46799	3.07421	2.3807	7.00637	5.5618	6.98123	8.7959
LOC_Os05g35160	clathrin assembly protein, putative, expressed	0.0971839	0.0270671	0.380078	0.17639	0.139373	0.204123	3.86431	4.49499	1.46748	1.53731	1.8352	1.26041
LOC_Os04g45900	OsYSL16	5.77469	10.6779	7.50103	5.16405	4.4231	3.73898	2.80171	3.00668	5.09631	4.11674	5.15723	5.99989
LOC_Os05g30700	expressed protein	3.13415	5.47683	3.28394	3.57557	3.24786	2.1813	1.12082	0.672692	1.61822	2.02779	1.46341	1.62169
LOC_Os01g28840	SLAC7	0.028771	0.345353	0.0556086	0.0108338	0.040532	0.00825551	0.0220009	0.0183681	0.00942095	0	0.0431849	0
LOC_Os09g38100	phosphate carrier protein, mitochondrial precursor, putative, expressed	1.50739	0.454127	1.37835	1.4691	1.73605	2.18999	4.97384	4.61277	2.3504	3.79473	3.45046	2.11324
LOC_Os03g14654	LTPL108 - Protease inhibitor/seed storage/LTP family protein precursor, expressed	0.129431	3.51689	2.81504	4.26196	5.56392	4.54956	2.8765	1.0185	2.0004	3.27942	4.79289	6.66727
LOC_Os03g10230	expressed protein	4.87764	2.6068	4.76305	4.58035	5.35392	6.50003	5.27039	7.40221	4.02044	5.73629	4.81298	3.12676
LOC_Os03g14690	vacuolar ATP synthase 98 kDa subunit, putative, expressed	28.6929	18.2768	24.4074	30.2121	33.2052	42.4813	70.2276	90.2463	51.9111	67.9176	51.9855	42.4674
LOC_Os02g47320	vacuolar ATPase G subunit, putative, expressed	6.59831	5.12701	7.717	4.35303	6.36173	6.60144	11.8461	10.1638	7.48442	9.20078	10.9325	8.22475
LOC_Os03g08680	pentatricopeptide, putative, expressed	1.04885	0.877539	1.67666	1.32453	1.09665	1.37024	1.96538	1.5809	1.91886	1.69534	1.78493	1.09566
LOC_Os01g72800	signal recognition particle receptor, putative, expressed	8.35481	11.375	8.89593	10.6214	10.3131	9.86608	5.04084	2.74951	5.86716	5.78561	5.87593	6.4381
LOC_Os09g09520	transporter family protein, putative, expressed	0.424434	1.36348	0.936303	0.691407	0.509982	0.449178	0.414121	0.203863	1.06029	0.605691	0.517023	0.455138
LOC_Os03g10510	outer mitochondrial membrane porin, putative, expressed	163.184	86.5841	122.579	140.738	167.228	200.085	170.319	207.919	133.586	178.905	142.458	132.92
LOC_Os01g12520	mitochondrial carrier protein, putative, expressed	6.36989	7.25979	7.31916	5.19579	6.63465	4.18501	11.3128	10.5744	11.2827	10.6359	10.2115	11.4627
LOC_Os01g28600	exo70 exocyst complex subunit family protein, putative, expressed	1.0457	1.08854	0.767105	0.70132	1.05181	0.885105	0.290648	0.464105	0.881709	0.888348	0.658956	0.494926
LOC_Os03g08560	plasma membrane ATPase, putative, expressed	0.71456	0.289796	0.952212	0.74481	0.840296	0.641831	0.810493	0.971568	0.93645	1.16909	0.892795	0.573008
LOC_Os02g47440	syntaxin, putative, expressed	31.0226	30.4957	27.1913	34.0812	34.5961	39.946	60.248	52.7711	46.01	53.0172	40.7094	38.1791
LOC_Os04g43210	transporter family protein, putative, expressed	67.0726	10.1589	83.2239	60.2501	77.2544	85.0881	93.2863	153.524	69.2972	94.1326	73.4307	51.793
LOC_Os07g47480	heavy metal-associated domain containing protein, expressed	2.13236	4.96716	4.61109	4.38493	4.95721	3.08288	8.45752	7.55191	9.2788	7.85259	9.82042	9.49836
LOC_Os05g30570	heavy metal-associated domain containing protein, expressed	6.80437	13.1103	13.5526	8.85274	9.01077	6.04246	6.87292	4.94078	14.3962	10.9814	12.2468	12.0601
LOC_Os01g28690	APIP12	13.8807	15.0299	12.1995	13.6581	13.5182	16.644	5.75996	6.25009	11.0463	10.4139	8.30092	9.9536
LOC_Os07g31300	ATP synthase delta chain, mitochondrial precursor, putative, expressed	198.927	156.403	210.305	166.806	191.914	179.737	304.581	264.829	208.273	256.298	271.467	218.806
LOC_Os12g42910	sodium/calcium exchanger protein, putative, expressed	2.313	3.79567	2.94613	3.46539	3.22728	1.81475	1.38894	0.873193	3.35954	2.88547	2.31149	2.75599
LOC_Os03g61290	ATCHX, putative, expressed	2.05595	2.17094	1.4667	0.727797	1.79416	1.64506	6.3714	4.70234	1.84178	2.36383	2.67111	2.49403
LOC_Os01g12680	C4-dicarboxylate transporter/malic acid transport protein, expressed	74.3126	72.5417	87.2085	91.2651	78.6364	77.0942	114.371	40.0937	112.168	98.9929	175.319	245.747
LOC_Os03g04360	OsPht1;7|OsPT7	71.787	28.9455	97.8563	61.163	65.8073	51.5871	96.7835	119.214	80.1229	75.334	84.125	81.1499
LOC_Os10g02260	peptide transporter PTR2, putative, expressed	0.55654	1.80401	1.19834	1.5982	0.876956	0.795689	0.359958	0.237845	0.813798	0.616616	0.334514	0.333817
LOC_Os10g02240	peptide transporter PTR2, putative, expressed	3.27495	7.70719	4.98583	4.46873	4.49133	2.99436	2.06048	0.90843	4.5351	3.30428	2.99497	3.39397
LOC_Os09g38410	sialin, putative, expressed	12.038	5.08129	9.10665	13.5117	11.0841	17.1484	22.9564	13.9225	12.1368	12.3499	20.7142	22.6062
LOC_Os04g37600	phosphate carrier protein, mitochondrial precursor, putative, expressed	13.9421	9.27554	26.103	14.5896	21.6664	23.0127	150.795	117.745	53.0654	68.522	83.7703	56.309
LOC_Os07g31884	MATE efflux family protein, putative, expressed	29.5072	41.5049	28.1406	28.685	26.8288	22.9834	27.676	15.3003	20.2478	20.9875	28.3379	49.7176
LOC_Os02g30650	heavy metal-associated domain containing protein, expressed	122.679	123.561	122.139	174.506	146.258	149.779	64.0347	44.3885	133.463	124.71	142.408	135.778
LOC_Os04g43070	OsAMT1;1|OsAMT1.1	41.2316	26.3868	53.9095	27.9673	25.7499	21.6932	52.8747	41.8956	40.7064	33.5385	44.653	54.2535
LOC_Os12g38310	mitochondrial import inner membrane translocase subunit Tim, putative, expressed	196.682	183.426	298.18	135.963	191.85	135.431	207.265	168.027	150.538	224.012	246.5	174.739
LOC_Os02g47210	OsPUT1	1.82429	3.36861	2.74613	2.83036	2.42593	1.54652	0.977655	1.44516	3.57596	2.80887	2.22546	2.75765
LOC_Os01g12470	mitochondrial carrier protein, putative, expressed	10.572	7.50183	12.6631	10.2413	12.2492	15.7142	22.4251	24.1512	16.1029	17.3022	16.5008	12.2668
LOC_Os01g48710	heavy metal-associated domain containing protein, expressed	7.90935	9.91554	12.8861	10.5213	10.7004	8.82615	10.1278	5.40724	16.3005	15.9982	16.3309	16.1131
LOC_Os04g33220	SAM domain family protein, expressed	25.4882	10.4849	21.3752	22.0636	27.1727	29.4409	22.2918	32.2579	19.2825	28.2916	19.6339	13.5986
LOC_Os03g10090	transporter family protein, putative, expressed	83.1442	146.457	82.8661	77.0827	74.2977	53.7422	56.123	31.2349	69.9547	58.2901	51.4345	69.3785
LOC_Os03g45170	amino acid permease, putative, expressed	5.23115	4.39593	4.65365	5.31083	5.2566	6.17195	7.5616	9.0643	7.65752	6.51982	7.56005	5.16064
LOC_Os03g04570	peptide transporter PTR3-A, putative, expressed	6.42392	11.6311	4.03031	5.64262	5.05438	3.1886	1.18407	1.57294	2.43661	1.9195	2.25967	4.16387
LOC_Os11g03710	mitochondrial import inner membrane translocase subunit Tim, putative, expressed	28.4486	21.5361	49.633	17.8491	29.0582	24.0733	48.1662	31.0077	26.2668	37.582	46.464	22.3298
LOC_Os01g12260	vacuolar ATP synthase subunit E, putative, expressed	78.4496	35.2523	69.2884	71.0045	98.0604	109.872	118.129	153.714	96.8107	151.489	93.2035	60.2466
LOC_Os02g47010	secretory carrier-associated membrane protein, putative, expressed	49.7743	54.6421	27.7682	61.4311	59.4448	51.0579	16.211	21.0693	27.3737	26.461	17.9955	27.1695
LOC_Os02g47090	peptide transporter PTR2, putative, expressed	0.00897887	0.285374	0.184353	0.0162439	0.0637152	0.0172568	0.338185	0.0728406	0.0795104	0.0524394	0.365308	0.162243
LOC_Os12g07270	bile acid sodium symporter family protein, putative, expressed	1.9401	5.82297	4.12851	2.86723	2.45837	1.7263	4.01498	3.13119	3.75898	2.50568	2.7667	2.1586
LOC_Os05g46720	phosphatidylinositol transfer, putative, expressed	18.2128	29.9182	17.4413	30.6905	25.4309	29.1939	16.6012	11.3453	26.5308	23.6809	21.4241	29.8751
LOC_Os10g22560	peptide transporter PTR2, putative, expressed	7.23565	10.4752	5.71858	6.52044	6.70586	6.43068	4.80007	1.79529	4.78662	5.38114	6.553	8.20667
LOC_Os04g50820	oligopeptide transporter, putative, expressed	11.7579	11.7811	26.7905	13.9935	18.3367	13.8573	48.8599	82.5724	33.1777	33.0351	33.6699	23.3798
LOC_Os04g50930	peptide transporter PTR2, putative, expressed	1.58785	1.06181	1.95933	1.93178	1.58832	1.74393	0.503144	0.25741	0.90105	1.13767	2.14748	2.44505
LOC_Os04g13220	ABC transporter family protein, putative, expressed	2.42381	1.10925	3.41136	2.50371	2.73976	2.94512	3.88765	3.29233	1.96143	3.1099	2.60203	1.96291
LOC_Os10g22330	clathrin adaptor complex small chain domain containing protein, expressed	66.1732	36.0454	68.6254	48.1811	54.1947	53.1904	52.3003	64.1865	51.5283	66.0518	60.6303	45.6575
LOC_Os03g57990	LTPL74 - Protease inhibitor/seed storage/LTP family protein precursor, expressed	10.5856	10.9612	5.94192	7.69178	9.47957	7.37795	8.37747	2.33966	4.39235	6.22609	9.8839	10.2794
LOC_Os03g57970	LTPL73 - Protease inhibitor/seed storage/LTP family protein precursor, expressed	6.45906	6.30624	4.00289	3.65734	3.87124	3.57923	0.80891	0.354112	2.23077	2.8042	1.66024	1.71972
LOC_Os01g52070	potassium channel AKT1, putative, expressed	1.12387	1.5789	0.584628	0.14022	0.44025	0.291621	0.396055	0.0240888	0.0123551	0.0518239	0.0438659	0.162094
LOC_Os04g37970	transporter family protein, putative, expressed	0.116815	0.39758	0.176669	0.12747	0.197043	0.0664963	0.325104	0.027464	0.158118	0.313684	0.491902	0.78349
LOC_Os04g37980	OsMST1	6.63961	0.1119	5.02089	3.56594	2.82304	3.58889	4.40217	1.62836	1.79591	1.22671	1.86246	4.66222
LOC_Os04g37990	transporter family protein, putative, expressed	8.18032	10.2017	5.28926	8.00527	8.19059	8.0069	3.58768	2.68798	4.32434	5.25772	5.13255	6.77462
LOC_Os08g25310	phosphatidylinositol transfer, putative, expressed	25.5479	24.4306	18.5656	36.9789	34.747	34.1714	11.6798	9.09988	20.297	21.2413	17.405	20.7624
LOC_Os05g35594	peptide transporter, putative, expressed	5.57198	7.38597	9.7286	7.73727	5.40965	3.86066	8.58379	5.08532	12.1914	10.0324	14.9844	16.9256
LOC_Os02g39910	B4-BTB1 - Bric-a-Brac, Tramtrack, Broad Complex BTB domain with B4 subfamily conserved sequence, expressed	0.844708	0.637714	1.47493	0.927119	1.11506	0.776965	1.80112	1.26163	1.67766	1.66018	1.89156	2.52912
LOC_Os03g26650	heavy metal-associated domain containing protein, expressed	5.02217	5.40344	10.9665	10.8272	9.91461	10.7869	36.047	23.2241	34.2955	29.0708	46.6048	55.1243
LOC_Os03g57310	OsSYP121	2.39858	2.39309	3.66117	2.6785	3.26413	1.49492	6.78926	7.48951	3.80161	4.37899	6.81322	5.76693
LOC_Os01g60740	Psd1	45.3616	94.0985	51.1197	31.5215	38.2488	34.8878	48.0444	24.7659	40.5652	34.8169	38.861	43.4648
LOC_Os09g26160	glutamate receptor, putative, expressed	5.63533	4.97029	5.05326	7.26038	7.35384	8.29036	11.4635	10.4677	9.23201	10.1417	7.50091	6.37649
LOC_Os05g35650	peptide transporter PTR2, putative, expressed	37.8578	29.2245	75.4081	41.4697	32.8687	27.2088	38.3039	40.4872	53.1127	45.3558	63.9008	62.8326
LOC_Os02g55970	ANTH, putative, expressed	12.9227	5.33155	8.97746	7.29329	9.81199	13.3083	2.98326	4.32435	3.45779	4.86585	3.11075	2.68523
LOC_Os02g55990	vesicle-associated membrane protein, putative, expressed	19.6155	11.52	21.9852	15.9837	23.0681	20.2583	34.014	34.2747	22.3368	35.0276	36.5022	23.6005
LOC_Os02g42220	transposon protein, putative, unclassified, expressed	20.5993	37.1809	20.5172	25.6038	23.6387	17.8365	12.2135	7.51092	21.9659	17.7356	15.0807	18.3346
LOC_Os02g14840	OsKAT3	0.910956	1.56201	0.588219	0.761294	1.08477	1.41816	0.267023	0.146216	0.553941	0.464423	0.303436	0.471724
LOC_Os03g22550	cation efflux family protein, putative, expressed	6.06664	6.62663	7.33797	7.27436	6.09443	6.16056	11.9977	10.1425	8.83567	8.42597	10.1344	9.79295
LOC_Os01g17214	major facilitator superfamily antiporter, putative, expressed	3.46201	6.39877	3.83192	2.59759	4.34625	4.82422	25.481	18.6975	10.0387	12.5472	14.4533	9.65832
LOC_Os02g39870	co-chaperone GrpE protein, putative, expressed	15.9617	10.583	12.0489	13.4721	14.5992	14.6781	16.357	25.4381	13.2925	14.6646	13.5715	11.1524
LOC_Os04g01150	ELMO/CED-12 family protein, putative, expressed	2.38608	0.968105	2.14679	1.88585	2.76571	3.72777	17.9157	16.9214	8.84693	9.16402	10.6832	4.85526
LOC_Os03g22490	heavy metal-associated domain containing protein, expressed	18.3378	28.0104	26.3219	26.1458	24.9653	16.1002	36.7183	9.76869	30.1776	43.1839	50.8353	66.5907
LOC_Os12g42300	potasium efflux antiporter protein, putative, expressed	3.94894	4.9755	2.39196	3.5607	3.26732	3.63057	4.44368	1.92787	2.60682	2.33795	3.0693	3.98665
LOC_Os08g25090	co-chaperone GrpE protein, putative, expressed	32.5665	21.4681	28.4455	26.1674	31.5894	31.5597	24.5612	37.2693	24.4583	32.5871	22.269	17.0139
LOC_Os06g05160	SPDT	8.76306	8.06675	15.5202	14.2235	11.8209	10.9448	38.6747	22.9975	23.2213	16.1777	30.7459	27.8016
LOC_Os12g34108	ATP synthase protein 9, mitochondrial, putative, expressed	20.5629	12.9801	19.6159	12.4821	22.8131	22.8188	16.544	15.3707	5.44061	19.7375	10.9128	6.93899
LOC_Os07g43290	LTPL56 - Protease inhibitor/seed storage/LTP family protein precursor, expressed	19.3101	20.8076	27.083	10.388	13.2779	10.5465	14.118	9.93117	10.4108	12.8323	14.4545	12.2138
LOC_Os10g22039	mitochondrial import inner membrane translocase subunit Tim17, putative, expressed	36.4089	42.7589	37.2512	39.2799	36.7831	34.0073	26.8501	14.2894	20.1694	26.3817	35.1866	30.6789
LOC_Os01g17240	transporter, major facilitator family, putative, expressed	1.02965	3.14176	2.26459	1.4577	0.908395	1.12987	1.34327	0.963954	1.58346	0.878294	1.20826	0.981329
LOC_Os05g35410	OsAKT2	5.2462	7.75587	2.8207	3.90034	5.10134	4.68165	1.21654	0.882589	1.93631	2.3347	2.61145	5.28793
LOC_Os02g07900	ANTH/ENTH domain containing protein, putative, expressed	0.493957	0.355635	0.96296	0.836684	0.990857	2.15595	58.7556	43.4864	20.0848	21.2765	28.92	16.2011
LOC_Os01g51380	ATP synthase, putative, expressed	56.2676	26.7999	50.4027	56.3709	62.6088	81.127	84.3407	110.481	68.6903	90.8212	62.2501	59.5239
LOC_Os08g34150	OsTIL-2 Temperature-induced lipocalin-2, expressed	25.6158	32.6336	8.14297	9.04045	11.1473	11.8423	17.8862	7.68641	9.10213	8.50536	11.0835	21.993
LOC_Os10g38274	ATP synthase C chain, putative, expressed	0.326451	0.411287	0.089503	1.06047	0.77218	0.404783	2.87307	3.95537	1.01805	0.740968	0.768288	0.197482
LOC_Os10g38276	chloroplast ATP synthase a chain precursor, putative, expressed	0.299376	0.207845	0.0645285	0.0828494	0.254804	0.061901	0.985869	2.04545	0.0909965	0.154344	0	0.09653
LOC_Os08g38400	oligopeptide transporter, putative, expressed	9.90644	19.1019	12.9852	11.7903	12.2896	8.56556	10.0655	4.78213	16.5091	11.9793	14.5301	15.9651
LOC_Os01g16910	outer mitochondrial membrane porin, putative, expressed	35.0271	19.8489	24.6704	30.9766	42.7704	54.3008	18.8523	29.0019	24.7904	36.7961	18.8672	16.5138
LOC_Os01g09660	expressed protein	4.08658	5.23646	5.52044	9.17123	7.02182	5.51597	2.10576	1.68236	5.07038	4.56059	4.61191	5.19333
LOC_Os04g32920	OsHAK1	31.1764	65.2143	34.3431	47.4304	34.5094	32.6341	28.0509	12.1885	29.6072	27.6745	40.0106	47.8224
LOC_Os07g29230	LTPL63 - Protease inhibitor/seed storage/LTP family protein precursor, putative, expressed	2.93573	17.4967	2.12375	1.34381	2.65893	1.8383	0.0601072	0	0	0.0835244	0	0
LOC_Os09g30446	transporter, monovalent cation:proton antiporter-2 family, putative, expressed	4.93309	1.55116	4.23187	3.07688	4.63291	5.86584	8.19002	10.2598	4.89808	6.92265	5.3988	3.67544
LOC_Os05g01030	phospholipid-transporting ATPase, putative, expressed	2.77046	4.16027	2.0421	2.25417	3.14897	2.09265	0.960965	1.07549	1.2362	1.27181	1.37698	1.84661
LOC_Os02g07870	ATP synthase, putative, expressed	56.2154	45.1241	56.8709	56.1169	63.2438	77.8892	97.3197	127.999	86.5801	94.4463	74.4775	66.0272
LOC_Os06g13210	peptide transporter PTR2, putative, expressed	15.944	21.1916	15.2618	23.0472	20.6585	20.5132	14.86	7.16835	13.3897	12.8016	16.5187	17.8833
LOC_Os06g13200	proton-dependent oligopeptide transport, putative, expressed	0.146103	0.0161521	0.417886	0.453374	0.378453	0.242822	0.689877	0.213387	0.687143	0.807385	1.15539	0.64407
LOC_Os03g37930	OsHAK21|qSE3	0.128793	0.0503671	0.0563814	0.111753	0.0994281	0.070178	1.00652	0.00817642	0.115954	0.58536	0.972908	1.09698
LOC_Os03g37840	OsHAK16	0.145909	0.577712	0.127931	0.200547	0.171214	0.319629	0.407076	0.248842	0.275114	0.600267	0.801727	1.14727
LOC_Os08g40530	calcium-transporting ATPase 9, plasma membrane-type, putative, expressed	15.2722	11.5646	10.9362	16.6372	17.4922	20.4463	29.3045	33.9496	21.9835	23.3037	19.1654	19.16
LOC_Os02g18670	ABC transporter family protein, putative, expressed	4.57029	5.0176	2.6418	3.31724	3.54673	5.53428	1.50531	2.91276	2.51905	2.32819	0.861416	1.0066
LOC_Os10g38870	heavy metal-associated domain containing protein, expressed	6.01562	14.9222	8.0604	7.46037	7.37893	5.36263	4.58002	1.82604	8.27767	6.26013	9.687	9.20212
LOC_Os09g21340	nucleobase-ascorbate transporter, putative, expressed	43.4284	48.7697	33.0192	59.4031	53.9952	59.3364	15.9429	15.8234	41.8632	41.7314	44.6565	51.6112
LOC_Os10g40420	LTPL138 - Protease inhibitor/seed storage/LTP family protein precursor, expressed	2.90042	4.08938	1.65857	1.45738	1.32463	1.12617	0.203178	0.447746	0.310689	0.434664	0.474079	1.31189
LOC_Os10g40430	LTPL139 - Protease inhibitor/seed storage/LTP family protein precursor, expressed	0.951519	1.54927	0.130446	0.0455726	0.179074	0.0968287	0	0	0	0.0282082	0	0.178901
LOC_Os01g16510	expressed protein	33.0119	22.8821	41.8372	30.4668	35.6165	35.8101	35.9709	40.0389	34.4508	45.1978	43.3581	29.5949
LOC_Os01g51250	mitochondrial carrier protein, putative, expressed	7.00907	6.20498	6.91441	6.37928	6.54908	7.23934	11.3507	14.2804	9.40779	8.88239	7.80894	6.38639
LOC_Os08g13570	exo70 exocyst complex subunit family protein, putative, expressed	0.129801	0.0947984	0.0624221	0.166124	0.0544307	0.0668032	0.24166	0.495377	0.24996	0.588873	0.570097	0.297705
LOC_Os04g54930	ABC transporter, ATP-binding protein, putative, expressed	2.00763	5.35409	3.94487	4.49069	3.06291	2.46374	1.22805	0.724424	3.70147	2.52103	1.42883	1.96779
LOC_Os03g54000	OPT|OsOPT7	7.87719	8.62898	6.77151	6.31135	7.21774	5.62483	5.99072	3.11923	7.0099	5.55811	6.82237	11.9233
LOC_Os01g60140	ATCHX15, putative, expressed	0.0742084	0	0.126386	0.0778602	0.135616	0.104772	18.569	9.86978	4.93247	3.76091	6.56449	4.9725
LOC_Os03g15690	phosphate carrier protein, mitochondrial precursor, putative, expressed	3.31732	4.30158	2.60934	3.04545	2.64078	2.8117	2.61531	1.25883	2.66516	2.38787	2.88961	2.9465
LOC_Os03g37830	potassium transporter, putative, expressed	0.316739	0.602664	0.16888	0.375069	0.285204	0.390731	0.28446	0.219493	0.577822	0.855359	0.721862	1.09381
LOC_Os04g17100	heavy metal-associated domain containing protein, expressed	77.5996	140.099	68.248	64.5356	65.0869	63.5916	36.3984	37.5111	37.433	47.6908	50.2657	91.1629
LOC_Os03g54050	anther-specific proline-rich protein APG precursor, putative, expressed	76.5925	102.586	96.2107	101.831	86.8784	70.9262	108.95	84.4771	150.697	126.706	169.353	182.848
LOC_Os10g30070	sodium/calcium exchanger protein, putative, expressed	1.18727	1.16858	3.08888	1.64938	1.61933	1.12822	7.33881	6.87612	3.93269	5.51001	5.77752	4.72732
LOC_Os10g30090	amino acid permease, putative, expressed	5.52166	4.87512	5.53495	6.10857	6.57977	8.79432	24.8459	24.6183	12.8275	15.5483	14.2214	10.8234
LOC_Os03g37490	PEZ1	19.6897	21.8548	19.1431	19.0295	17.4298	15.6355	10.8734	8.20583	21.6394	17.7533	20.7037	23.6802
LOC_Os03g37411	MATE efflux family protein, putative, expressed	1.11421	0.966157	0.259888	0.117252	0.287417	0.311179	0.480544	0.198035	0.0927955	0.283077	0.505034	0.649728
LOC_Os03g41064	natural resistance-associated macrophage protein, putative, expressed	0.343847	0.0979737	0.0829293	0	0.223463	0.145334	5.7674	2.84215	0.932907	0.855902	3.4873	1.26399
LOC_Os03g41070	metal transporter Nramp2, putative, expressed	0.0419912	0.0414417	0.17068	0.0563122	0	0.0598236	3.10827	1.46095	1.15886	0.77246	1.14209	0.777791
LOC_Os01g56420	COPT1	0.848769	1.34713	1.30427	0.528529	0.913971	0.166495	2.60536	1.28175	0.555562	1.4898	2.32637	1.31464
LOC_Os11g03500	MATE efflux family protein, putative, expressed	2.11994	2.04033	0.607471	1.34436	1.14112	1.59357	0.885212	0.433534	0.597314	0.947351	0.830076	1.30816
LOC_Os02g51110	Lsi1|OsNIP2;1|OsLsi1	0.377305	0.43322	0.52908	0.39208	0.500531	0.187199	1.18083	0.757873	0.534441	0.577913	0.814895	0.618286
LOC_Os09g37610	MATE efflux protein, putative, expressed	7.48918	5.96778	7.38412	6.8964	7.41118	8.24406	10.87	11.8698	9.44793	11.8909	8.31515	8.17217
LOC_Os04g44060	OsPIP2;3	0.512894	1.38748	0.680275	0.415646	0.293587	0.133534	2.44686	0.528104	1.61714	0.913464	2.16826	7.44294
LOC_Os03g45370	OsCCX2	7.03934	12.1788	9.1556	8.3369	7.29587	4.36612	8.65954	6.20954	9.06853	8.11749	8.38387	12.8862
LOC_Os05g42250	cyclic nucleotide-gated ion channel 2, putative, expressed	3.83019	6.25812	2.99826	3.67911	3.34328	3.13933	4.26067	1.94882	3.34437	4.15976	4.58895	5.80556
LOC_Os04g46490	aquaporin protein, putative, expressed	0.278552	0	1.85428	0.546117	1.28688	0.796188	13.4128	6.93543	3.73381	5.01257	6.83292	4.29924
LOC_Os06g45500	OsHMA9	13.4924	18.342	9.36	11.8817	12.0963	11.3722	10.9442	6.47773	9.16661	8.89111	6.95893	8.91975
LOC_Os01g24950	exocyst complex component 6, putative, expressed	13.3621	17.8707	12.9053	13.4624	12.3282	11.8278	9.28741	7.21688	10.9897	9.66805	12.213	14.2235
LOC_Os07g03910	transporter, major facilitator superfamily domain containing protein, expressed	1.00346	1.25902	1.21098	1.42097	1.12104	0.922414	0.847126	0.205179	0.821357	0.76243	0.630538	0.989547
LOC_Os09g33470	mitochondrial carrier protein, putative, expressed	2.51099	1.4099	3.39269	2.42571	2.09658	2.97402	5.05764	4.18805	2.90156	4.48544	4.14376	3.13105
LOC_Os10g03400	OsSNDP1	8.46309	3.68657	11.585	8.92937	12.3382	15.5844	22.4402	23.6499	10.9704	18.932	15.7068	9.2921
LOC_Os10g30450	heavy-metal-associated domain-containing protein, putative, expressed	9.46138	7.53404	14.5489	6.23619	9.24801	5.57884	11.1279	17.6195	8.85407	11.5557	10.0673	8.78104
LOC_Os02g46860	oligopeptide transporter 4, putative, expressed	1.20968	3.81225	1.29925	2.08498	1.93082	0.813147	0.271072	0.243608	0.752579	1.18535	1.09369	2.12106
LOC_Os02g46850	oligopeptide transporter, putative, expressed	7.56131	13.982	5.06138	9.98235	10.8052	6.65559	3.32929	1.29261	3.17705	3.47308	5.02551	5.52567
LOC_Os03g03680	transporter family protein, putative, expressed	12.1635	0.375445	16.0192	14.1378	20.146	23.3598	20.8926	25.577	13.1078	26.755	19.4653	10.5288
LOC_Os12g37360	OsSar1b	14.7175	12.3713	20.3734	10.425	13.8989	9.34198	24.8701	16.289	13.4882	19.969	21.3696	17.3884
LOC_Os12g37840	OsBOR1	185.034	205.567	267.893	286.828	263.972	272.619	145.585	66.1392	244.38	222.259	276.503	352.048
LOC_Os06g49250	OsPTR9|OsNPF8.20	1.94548	7.56203	10.1573	6.61681	3.98891	2.36903	1.16212	1.7355	7.80787	4.8432	3.92463	2.38984
LOC_Os03g10640	calcium-transporting ATPase, plasma membrane-type, putative, expressed	5.98566	1.76673	12.4314	7.66466	9.80153	9.56532	55.1239	78.207	27.648	28.7893	29.7539	21.3858
LOC_Os06g49210	retrotransposon protein, putative, unclassified, expressed	0.65628	1.56115	0.97109	0.747333	0.65177	0.681628	0.852568	0.39079	1.0777	0.913236	0.743452	0.783632
LOC_Os06g49190	LTPL154 - Protease inhibitor/seed storage/LTP family protein precursor, expressed	0.423097	1.23284	1.38501	0.563069	0.984645	0.530438	0.853129	0.145034	0.596144	0.675798	1.29929	1.21782
LOC_Os05g05590	OsNHX2|OsNHX3	7.95682	10.4714	6.47648	7.82259	6.60967	9.0625	5.98651	3.17921	4.86404	4.69377	5.75907	7.82826
LOC_Os11g03060	SNF7 domain containing protein, putative, expressed	15.0652	13.5685	10.9606	17.1639	16.906	17.3527	5.02013	5.01629	9.17801	11.6141	9.00919	10.4786
LOC_Os11g03070	ATCHX, putative, expressed	0.00753349	0.0685936	0.0690767	0.0190008	0.0533152	0.0361972	0.996313	0.669106	0.218308	0.223881	0.319861	0.215392
LOC_Os02g46680	multidrug resistance protein, putative, expressed	122.048	156.68	132.492	145.245	111.408	110.532	28.2923	17.8259	81.3957	62.5493	78.3215	128.205
LOC_Os01g51770	outer mitochondrial membrane porin, putative, expressed	18.0405	13.3263	18.5203	10.8149	16.7824	16.705	12.4344	12.8409	7.90647	12.3323	9.95237	9.39727
LOC_Os09g33720	protein transport protein Sec61, putative, expressed	6.014	3.81112	5.47064	4.73397	5.06922	6.98808	4.27137	4.34106	3.20116	4.29456	3.69038	2.78712
LOC_Os04g32850	Pi21	4.81035	16.7488	11.0606	11.1894	8.5141	3.48403	8.99148	3.50923	8.33651	10.2078	11.1628	9.48547
LOC_Os06g38294	peptide transporter PTR2, putative, expressed	15.632	9.29477	22.7202	24.3162	19.973	14.181	27.8768	21.4575	31.9475	23.3165	30.0152	38.7259
LOC_Os04g46079	ELMO/CED-12 family protein, putative, expressed	4.41977	2.99499	5.02765	4.88749	7.12914	8.01854	19.7862	22.93	10.4596	14.5753	11.7671	7.80758
LOC_Os10g30790	OsPht1;8|OsPT8	12.6974	25.9003	15.7801	19.5397	14.8995	11.1078	16.0364	15.1627	18.4438	17.6773	25.7299	28.453
LOC_Os06g45050	clathrin assembly protein, putative, expressed	7.80536	7.14099	6.97441	8.42553	9.97098	13.3467	29.4867	29.3823	16.1745	18.3628	15.4265	13.5181
LOC_Os10g26470	OsSUT3	0.0141803	0	0.401216	0	0.0869885	0.464651	32.6157	11.7642	5.09984	6.81581	15.3594	10.4486
LOC_Os12g02840	ATCHX, putative, expressed	0	0.00874928	0.165433	0.0125636	0.0327649	0.106776	4.63903	2.90902	0.82134	1.00563	1.64422	1.52941
LOC_Os12g02830	SNF7 domain containing protein, putative, expressed	8.03018	10.5855	8.53255	12.4491	11.7694	10.1356	3.40689	3.53613	8.77747	9.9146	6.71421	5.89085
LOC_Os08g20570	chloride channel protein, putative, expressed	14.2712	18.3492	22.5046	22.333	16.6626	11.9821	13.4772	9.18853	29.3968	18.5241	26.4937	32.8646
LOC_Os04g58620	AM1	24.4093	20.7802	28.3087	27.7843	30.5109	34.3547	39.6499	42.5859	32.4868	34.0112	28.6698	25.7864
LOC_Os02g36700	OsSUT5|OsSUT5Z	2.16839	4.75646	1.85255	1.32182	2.06759	1.36712	1.54496	0.738146	0.900757	0.829592	1.32352	0.96777
LOC_Os03g19290	mitochondrial import inner membrane translocase subunit Tim17, putative, expressed	0.590277	1.5992	0.611006	0.317071	0.379437	0.177231	1.55127	2.14856	0.663191	0.456244	0.668187	1.15291
LOC_Os04g36040	peptide transporter PTR2, putative, expressed	0.992291	1.62591	0.925488	0.683582	0.99644	0.564494	0.78772	0.446104	0.46552	0.627078	0.670691	0.855451
LOC_Os02g09150	inorganic H+ pyrophosphatase, putative, expressed	103.673	148.254	75.6698	95.7588	81.5691	99.2993	52.4609	38.8166	76.5726	47.5795	49.7811	80.9773
LOC_Os07g30250	RFT1, putative, expressed	30.0165	20.0919	31.9879	56.4984	46.2412	50.0944	60.2806	36.2397	52.8594	58.0285	74.8242	71.6655
LOC_Os12g03860	major facilitator superfamily antiporter, putative, expressed	1.97479	3.65855	0.640005	1.01175	1.31012	2.34242	1.8582	1.1072	0.803014	0.788516	0.639158	1.46917
LOC_Os06g14030	OsGORK|OsK5.2	0.543543	0.481844	0.754084	0.772425	0.757033	0.784239	3.79988	1.06952	1.26066	1.05971	1.44193	1.49408
LOC_Os06g45940	potassium transporter, putative, expressed	7.95064	11.0099	9.25706	8.74843	8.50629	6.97275	5.07097	4.15532	8.96562	6.07892	7.03405	7.77606
LOC_Os08g06010	transporter, major facilitator family, putative, expressed	10.2423	21.1576	8.50516	14.7506	12.5286	13.0843	14.5978	11.3709	21.9437	16.8791	16.5755	25.8537
LOC_Os02g54640	glutamate receptor, putative, expressed	0.141402	0.736666	0.741864	0.293901	0.26069	0.109136	0.473846	0.530723	0.895372	0.44841	0.355182	0.432087
LOC_Os04g32030	heavy metal-associated domain containing protein, expressed	142.047	255.651	150.9	103.37	132.95	88.8824	84.4911	53.8383	90.4973	73.0253	88.5004	112.391
LOC_Os04g46880	transporter, major facilitator family, putative, expressed	37.178	86.9529	25.2911	34.8044	32.3688	38.2388	50.0669	28.3349	33.9465	25.7224	35.8318	62.9485
LOC_Os04g46830	LTPL122 - Protease inhibitor/seed storage/LTP family protein precursor, expressed	1.54594	4.76433	1.09007	0.631617	0.510141	0.194988	0.0856827	0.124994	0.340173	0.119945	0.0237832	0.247038
LOC_Os01g23580	inorganic H+ pyrophosphatase, putative, expressed	8.55311	3.5155	10.5727	3.92734	5.9248	5.33876	5.30637	4.68424	3.26365	4.4178	3.89138	3.14434
LOC_Os11g17970	POT family protein, expressed	6.25157	3.89627	23.5793	22.5805	14.4184	9.48718	17.1046	9.25164	46.208	40.5779	59.6064	42.2244
LOC_Os03g48810	nucleobase-ascorbate transporter, putative, expressed	0.960894	2.38499	1.15138	1.77069	1.27708	1.12605	0.427632	0.452355	1.2986	1.33876	0.67327	0.644442
LOC_Os09g08910	ATP synthase, putative, expressed	1.14011	0.920578	0.796628	0.880447	1.18237	0.764668	1.88785	2.92443	1.51137	2.96408	1.13803	0.920072
LOC_Os03g50280	GLTP domain containing protein, putative, expressed	6.02016	5.46018	6.56062	4.99917	6.96475	7.03692	39.3048	35.4843	13.2109	17.099	24.2999	17.1705
LOC_Os09g15170	nucleobase-ascorbate transporter, putative, expressed	4.60081	5.13196	5.607	7.8796	7.31385	7.09569	1.8984	0.928236	4.19369	4.42556	3.93504	4.38459
LOC_Os03g07480	OsSUT1	3.04053	5.40085	3.22682	2.91297	3.30545	2.41028	47.6851	29.5802	11.1554	12.5625	16.5929	12.9913
LOC_Os08g42000	nuclear transport factor, putative, expressed	156.423	174.281	209.737	76.4794	111.835	76.8208	185.053	181.318	151.026	133.622	159.847	170.029
LOC_Os11g29200	protein transport protein, putative, expressed	24.4472	22.3476	18.5057	27.4325	29.6797	37.6235	25.7565	37.3526	33.3584	31.213	22.5026	24.4603
LOC_Os01g27170	potassium transporter, putative, expressed	2.66936	0.165962	11.7437	3.97755	7.55557	5.25469	37.0735	32.6228	16.3057	19.5837	25.1971	16.8095
LOC_Os06g14450	exo70 exocyst complex subunit family protein, putative, expressed	0.375544	0.535591	0.463097	0.738457	0.68582	0.708401	0.329036	1.83907	0.801177	0.664922	0.365919	0.360353
LOC_Os12g23280	heavy metal-associated domain containing protein, expressed	66.1909	122.981	70.0179	61.0742	63.5143	45.0312	47.4466	23.2397	56.7176	51.3554	51.7388	70.1876
LOC_Os02g58730	OsRacD|OsRac5	62.0812	66.3058	46.8618	62.4722	58.2783	59.259	27.7902	26.64	42.5455	46.4491	42.576	45.5724
LOC_Os02g48720	mitochondrial carrier protein, putative, expressed	639.886	538.877	611.56	520.744	619.076	645.019	1155.74	1150.81	802.11	927.191	954.058	787.525
LOC_Os09g39680	transporter, major facilitator family, putative, expressed	17.1966	20.8786	12.8536	17.9472	16.63	16.8017	11.574	4.41093	11.5231	11.4754	18.5401	21.0336
LOC_Os09g10740	mitochondrial import inner membrane translocase subunit Tim17, putative, expressed	9.36163	6.84423	8.89187	4.85869	8.39007	7.70774	18.1336	15.3854	9.10835	11.6934	11.4974	8.80709
LOC_Os03g62270	MATE efflux family protein, putative, expressed	2.61017	6.21358	3.03574	2.89714	1.9514	1.5757	5.24519	0.996707	2.03536	1.94291	1.7321	2.08924
LOC_Os03g07100	LTPL82 - Protease inhibitor/seed storage/LTP family protein precursor, expressed	18.3034	28.6648	13.594	11.091	13.3781	8.03411	9.47433	3.45867	4.66533	5.56064	9.93533	15.4921
LOC_Os02g48880	chloride transporter, chloride channel family, putative, expressed	3.24316	4.98641	2.43505	2.97232	2.92591	3.05513	2.13372	1.72104	2.94413	2.57257	2.22997	3.00275
LOC_Os03g62200	ammonium transporter protein, putative, expressed	0.0553688	0.900329	0.705201	0.587997	0.4448	0.255739	1.63025	0.744455	0.697358	0.812332	1.87012	2.57833
LOC_Os08g42380	mitochondrial import inner membrane translocase subunit Tim, putative, expressed	85.3058	57.3953	71.2116	81.3011	118.526	158.894	58.3354	80.1361	73.1948	103.011	52.2399	45.8236
LOC_Os03g48310	plasma membrane ATPase, putative, expressed	16.8156	17.9867	12.5776	20.118	22.7793	26.3255	9.44082	6.86983	18.5257	16.1275	20.1171	20.5231
LOC_Os02g36490	expressed protein	21.4813	15.5927	13.5081	10.4945	11.6941	13.8319	9.50723	3.92073	4.32263	4.65593	6.44406	12.3204
LOC_Os05g40650	ATCHX, putative, expressed	0.24501	0	2.03881	0.87411	1.48695	1.08411	13.0669	11.3057	5.11059	6.07662	7.00787	5.80722
LOC_Os09g26900	ctr copper transporter family protein, putative, expressed	16.4506	25.1879	25.1067	13.9506	13.98	9.50479	15.1687	6.41684	12.9673	12.22	21.6296	22.6204
LOC_Os02g43620	transporter, major facilitator family, putative, expressed	0.770664	0.471737	0.821477	0.53461	0.772367	1.08006	4.39188	3.31047	1.21679	1.57233	1.18354	1.44425
LOC_Os11g25030	mitochondrial 2-oxoglutarate/malate translocator, putative, expressed	0	0	0.400322	0.263511	0.144292	0.162189	3.80998	2.1298	1.51782	2.10254	3.01043	1.73786
LOC_Os05g33960	peptide transporter PTR2, putative, expressed	0.730693	0.719327	0.398947	0.399089	0.769157	0.329694	1.50456	2.15958	1.69549	1.21381	1.56838	2.7529
LOC_Os01g03914	OsMTP9	46.0121	14.7765	39.3822	37.8299	49.6534	64.161	40.1055	57.3931	29.7863	49.2236	30.873	21.256
LOC_Os07g34006	transporter family protein, putative, expressed	9.27161	11.9083	6.03123	4.45333	2.04451	2.8738	6.50595	15.9787	6.81585	2.45343	5.31748	6.63214
LOC_Os10g33170	POT domain containing peptide transporter, putative, expressed	14.7414	28.32	16.0946	16.3609	14.3898	9.47489	8.51972	10.8147	17.6694	13.8598	8.47339	13.3452
LOC_Os02g13560	OsTMT2	21.4407	50.8816	31.6595	25.9358	22.0145	22.4115	9.92865	12.757	26.1395	16.0833	15.6168	21.5844
LOC_Os08g28170	nucleobase-ascorbate transporter, putative, expressed	4.07299	8.68538	6.97162	4.42345	4.19506	4.5664	5.5901	2.69841	4.2811	3.57609	5.25784	4.11725
LOC_Os02g43590	ELMO/CED-12 family protein, putative, expressed	28.0612	26.1412	16.922	31.0718	28.4947	30.1997	13.2194	10.3852	17.8977	17.3638	15.0888	18.699
LOC_Os09g15790	ras-related protein, putative, expressed	3.36796	1.74539	3.20088	3.5346	3.16179	4.32605	16.254	10.3784	6.97171	8.11639	9.92478	7.87823
LOC_Os07g07910	potassium channel AKT1, putative, expressed	0.015637	0.0261121	0.111427	0.00839475	0.0314492	0.08316	3.82764	3.30587	1.20139	0.959136	1.83408	1.28762
LOC_Os01g55600	peptide transporter PTR2, putative, expressed	0.999935	0.0697483	0.391404	0.0231889	1.16792	0.287446	0.0806595	0.0388316	0.118303	0.100445	0.0577884	0.0509772
LOC_Os01g20160	OsHKT1;5|SKC1|OsHKT8	0.124721	0.326871	0.119265	0.183891	0.0658351	0.209369	0.0342478	0.021782	0.0961448	0.107809	0	0
LOC_Os03g48180	OsNPF2.4	85.2344	150.883	84.7709	65.8299	59.3644	43.1354	29.5998	19.0542	52.5235	39.9108	53.672	82.8465
LOC_Os10g37430	expressed protein	23.1579	13.4456	28.3774	21.7393	27.8673	31.3324	27.2786	34.3464	25.8319	32.6052	28.1968	19.993
LOC_Os03g48000	CorA-like magnesium transporter protein, putative, expressed	29.3254	20.2763	13.4744	11.229	18.2616	30.6626	78.38	46.3673	18.4671	28.305	44.7474	43.9538
LOC_Os01g11160	amino acid permease family protein, putative, expressed	42.6377	47.9078	56.4561	55.1847	37.9449	27.1544	9.67319	9.29755	48.2052	32.0753	35.0262	51.1117
LOC_Os11g29490	plasma membrane ATPase, putative, expressed	3.6253	4.70786	3.08053	3.54665	3.62475	3.79666	1.93451	1.89702	3.20427	3.42869	2.67782	2.79478
LOC_Os01g62950	ras-related protein, putative, expressed	30.4762	13.467	30.7823	28.6087	36.5007	45.55	71.508	64.713	39.862	57.7277	56.8702	34.4062
LOC_Os02g50960	OsPIN1|REH1|PIN1b|OsPIN1b	9.32733	15.3857	12.0487	10.8069	8.85964	6.56832	8.76439	7.11407	15.9584	14.1108	12.8225	15.3319
LOC_Os10g37690	inner membrane protein, putative, expressed	8.77897	4.39266	7.86311	7.34315	9.67634	12.3379	11.3502	16.6718	9.71223	13.6564	9.04552	6.28809
LOC_Os02g13870	OsNIP1;1	421.148	633.245	407.249	291.691	291.021	239.408	104.578	89.5215	142.724	160.527	135.846	249.258
LOC_Os07g13950	expressed protein	26.5975	24.1438	41.4305	17.5041	29.9212	17.423	48.5759	36.4345	31.9687	43.5481	47.9385	38.7052
LOC_Os03g11734	OsFRDL1	1.50409	1.97764	2.9657	2.48511	2.25399	2.74932	5.18975	1.69456	7.16952	5.28081	13.8764	10.1287
LOC_Os02g04030	phosphatidylinositol transfer, putative, expressed	10.0684	2.3785	28.3712	13.5586	22.759	21.9721	204.459	177.236	86.5002	108.859	114.92	67.7014
LOC_Os05g08430	OsBOR4	13.8579	6.85328	15.743	34.1065	24.6753	34.8244	27.2692	24.1934	38.5148	38.8374	45.4018	41.5155
LOC_Os01g03490	heavy-metal-associated domain-containing protein, putative, expressed	46.8563	72.4208	41.7068	60.4869	62.8718	55.2665	10.7582	7.09361	29.7889	27.2175	21.0974	25.3085
LOC_Os07g30810	nucleobase-ascorbate transporter, putative, expressed	24.1903	38.2574	22.271	26.1433	24.6768	21.7834	9.75609	6.69416	14.7322	13.6015	12.3609	17.7598
LOC_Os04g58870	exo70 exocyst complex subunit, putative, expressed	5.34436	3.23288	3.69664	3.34974	4.80656	6.38199	3.779	5.94101	4.20267	5.61591	3.66724	2.8519
LOC_Os10g21236	chloroplast ATP synthase a chain precursor, putative, expressed	0.117358	0.103922	0.0295937	0.0584398	0.0318291	0	0.710787	1.02611	0.218243	0.0318456	0.0339124	0.130593
LOC_Os01g66980	expressed protein	2.62504	4.37555	3.76728	4.29511	5.5075	4.83934	2.38156	1.17807	2.9259	3.13552	3.71934	3.18899
LOC_Os07g07870	LTPL77 - Protease inhibitor/seed storage/LTP family protein precursor, putative, expressed	0.220624	0.0489559	1.96414	0.218745	0.911034	0.91872	48.0266	34.0778	14.8522	14.7556	25.2643	15.2387
LOC_Os01g62570	ATP/GTP/Ca++ binding protein, putative, expressed	1.13214	1.59646	0.913518	0.560781	1.0976	1.19538	0.398527	0.467915	0.428199	0.56866	0.329569	0.441582
LOC_Os01g11414	sodium/calcium exchanger protein, putative, expressed	118.482	157.863	121.117	126.233	97.0201	115.766	39.6282	28.2269	70.2477	57.9283	70.8226	98.4386
LOC_Os03g07890	mitochondrial carrier protein, putative, expressed	2.71998	3.61054	3.67962	2.37486	2.47264	1.80262	2.80405	2.20804	3.17627	3.2918	3.83071	4.39298
LOC_Os01g55799	exo70 exocyst complex subunit domain containing protein, expressed	2.65073	3.05449	2.3159	2.72315	2.56297	2.55517	3.65745	2.0158	3.04858	2.7028	2.99464	4.65876
LOC_Os08g28080	coatomer subunit delta, putative, expressed	10.709	7.80167	10.1712	8.68406	10.1527	12.8794	13.0983	15.1277	11.1292	14.4638	10.8437	8.12607
LOC_Os04g40570	ABC transporter, ATP-binding protein, putative, expressed	0.0343313	0.16547	0.0801753	0.150766	0.0544759	0.108837	0.689704	0.348873	0.244505	0.151084	0.285317	0.226893
LOC_Os11g04150	major facilitator superfamily antiporter, putative, expressed	0.237587	0.38257	0.228469	0.161102	0.419121	0.663371	0.287802	0.105133	0.158166	0.15876	0.121697	0.0554365
LOC_Os02g17350	VHS and GAT domain containing protein, expressed	8.54124	9.36051	7.5815	9.21288	9.52895	12.1621	18.1352	15.8133	10.7199	13.2444	15.1669	16.6499
LOC_Os05g04120	ferroportin1 domain containing protein, expressed	0.388052	0.737604	0.634415	0.762547	0.653516	0.452623	0.312313	0.0769913	0.204167	0.401295	0.577206	0.26996
LOC_Os05g45740	mitochondrial ATP synthase g subunit family protein, putative, expressed	83.0634	64.9116	145.164	50.044	83.5651	83.2505	168.704	172.096	102.607	149.311	145.25	95.5205
LOC_Os01g67630	peptide transporter PTR2, putative, expressed	1.07724	2.67731	1.67383	0.948327	1.21155	0.953192	1.06044	0.358079	1.53678	1.86546	1.69171	1.66505
LOC_Os07g46540	condensin complex subunit 1, putative, expressed	2.13689	1.79648	1.81572	1.60546	2.33445	2.95728	2.00437	1.924	1.94569	2.00456	1.4163	1.13178
LOC_Os08g39370	citrate transporter, putative, expressed	2.81604	8.26506	1.58801	0.428409	0.440781	0.656521	4.38743	2.3684	0.462376	0.326824	0.259879	0.542039
LOC_Os01g04190	OsPGLCT	53.5852	36.8076	61.1301	62.3171	67.8442	83.2096	92.6122	120.776	75.8504	97.9769	74.3083	61.3134
LOC_Os01g67810	transposon protein, putative, unclassified, expressed	0.159334	0.305198	0.242428	0.252596	0.258159	0.282861	0.285971	2.64173	0.377562	0.527632	0.638376	0.796803
LOC_Os12g28260	cyclic nucleotide-gated ion channel, putative, expressed	0.985895	0.0666002	3.31005	1.72458	2.64225	2.05059	16.6442	22.1251	8.18902	9.64065	9.96164	6.99445
LOC_Os10g25830	mitochondrial carrier protein, putative, expressed	2.00629	4.02081	2.73043	2.8171	2.00788	1.37504	1.83871	0.891385	3.73766	2.58986	2.68771	2.61982
LOC_Os05g45820	heavy metal-associated domain containing protein, expressed	0.6884	0.974021	0.354209	0.644466	0.412227	0.917943	0.419937	0.0972736	0.378711	0.219152	0.360247	0.402134
LOC_Os01g67820	exo70 exocyst complex subunit domain containing protein, expressed	0.260628	1.98129	0.280009	0.395068	0.200028	0.545392	0.426189	9.89693	0.855174	0.487328	0.688595	0.780093
LOC_Os09g27580	potassium transporter, putative, expressed	30.2855	44.8314	33.0392	34.7892	29.3183	27.7787	25.3016	14.4451	34.4085	27.4074	41.8622	42.483
LOC_Os03g44440	cyclic nucleotide-gated ion channel, putative, expressed	3.65776	0.752939	7.54017	3.72008	5.26533	3.55053	21.2892	20.384	11.1196	11.3944	12.0633	9.1783
LOC_Os03g11900	OsMST4	1.91693	5.30221	2.57734	2.2624	1.88024	1.13617	3.64594	2.42169	2.41857	2.82595	4.15029	5.34206
LOC_Os01g11980	SFT2, putative, expressed	6.48955	6.75968	7.63456	5.16041	5.95557	5.91741	10.6373	7.69932	6.58176	8.02443	12.5161	7.8089
LOC_Os06g07200	syntaxin, putative, expressed	2.89451	2.98696	6.64713	4.66913	4.73902	3.7997	5.99406	8.26046	8.00983	9.19797	9.15742	5.9181
LOC_Os08g05910	OsNRT1.1A	12.6665	21.5535	8.79425	10.3286	11.0575	8.1506	12.3243	8.01575	12.9815	13.8595	9.06489	13.0136
LOC_Os02g17500	OsGMST1	51.0073	40.0199	45.9715	38.3962	44.5643	52.1594	81.9822	103.346	56.0071	52.8998	63.0776	62.9632
LOC_Os05g45950	outer mitochondrial membrane porin, putative, expressed	210.628	160.556	152.846	142.713	148.416	176.764	87.0738	85.152	96.8333	106.168	98.3538	115.771
LOC_Os01g08350	ATP synthase subunit alpha, mitochondrial, putative, expressed	2.22156	1.85475	1.49936	1.25912	1.82414	1.68444	4.26696	3.86692	3.15196	5.03891	1.42927	1.09975
LOC_Os07g14540	vesicle-associated membrane protein, putative, expressed	21.3758	17.8105	12.1794	25.1887	25.6509	25.3713	8.13601	9.76008	16.0575	16.7988	10.0955	11.8557
LOC_Os04g59480	POT family protein, expressed	1.50484	5.3308	6.18445	2.38489	1.85814	1.22069	0.605365	1.63339	4.65084	1.90225	1.1126	1.13133
LOC_Os01g16030	ADP-ribosylation factor, putative, expressed	127.538	92.4807	59.0697	98.9451	112.209	128.866	45.8422	54.0521	53.1395	67.8216	41.4569	45.1596
LOC_Os01g67580	multidrug resistance-associated protein, putative, expressed	1.22273	1.38456	0.913045	1.7247	1.29848	1.40615	0.858856	0.680519	0.818445	0.695969	0.545291	0.946365
LOC_Os05g41580	calcium-transporting ATPase, plasma membrane-type, putative, expressed	0.828891	1.11268	0.488743	0.927205	0.919234	0.940589	0.605911	0.368096	0.956073	0.750992	0.607848	0.890633
LOC_Os12g43080	expressed protein	0.437374	0.684147	0.230596	0.193211	0.331443	0.190099	0	0	0	0.0600586	0	0
LOC_Os08g39950	potassium transporter, putative, expressed	73.4679	24.7811	75.3813	57.1729	81.0917	92.5293	116.204	130.476	75.9786	125.663	92.3182	55.6935
LOC_Os11g41850	transporter family protein, putative, expressed	5.55122	10.4859	4.82279	3.8437	2.95463	2.30412	0.276342	0.620058	0.837897	0.911154	0.192785	2.69731
LOC_Os02g04630	sodium/calcium exchanger protein, putative, expressed	63.1975	31.4886	43.2144	60.8535	56.4009	95.8354	77.6036	78.6182	71.9808	52.1449	47.0268	55.244
LOC_Os05g04610	ABC transporter, ATP-binding protein, putative, expressed	13.4369	24.3196	9.33228	20.1787	15.2569	12.6836	10.7206	3.84727	12.5696	13.9017	12.0966	13.2767
LOC_Os01g50820	OsNRT2.3	1.46411	1.58614	2.09791	1.26457	1.28947	0.999122	1.43401	0.840718	1.25691	1.75752	2.27313	2.50407
LOC_Os05g04600	ABC transmembrane transporter domain containing protein, expressed	1.99543	5.8341	3.33773	4.8034	3.31319	2.47072	1.21931	0.412985	2.73773	2.64669	3.19133	5.10996
LOC_Os09g27980	emp24/gp25L/p24 family protein, putative, expressed	2.69598	0.0418536	6.48394	3.54495	7.03764	8.87323	20.3001	24.665	11.0442	19.6635	16.744	8.36549
LOC_Os01g08020	BOR2	5.17527	4.48313	4.03115	2.85017	4.84935	6.6505	2.55173	2.81612	3.20239	3.65083	2.22535	2.19096
LOC_Os11g41870	transporter family protein, putative, expressed	0.349461	0.242395	0.558159	0.439445	0.553163	0.386752	0.997091	0.546601	2.14942	1.48123	2.17148	1.69492
LOC_Os02g31910	potassium transporter, putative, expressed	3.60748	2.45851	12.942	5.44486	10.2686	6.74999	32.8281	33.0452	19.3353	23.3863	27.1585	16.9042
LOC_Os02g31940	potassium transporter, putative, expressed	0.00718309	0.00956347	0.151095	0.0220536	0.0169451	0.0164774	0.21572	0.153286	0.130761	0.106301	0.25719	0.128476
LOC_Os10g14150	ras-related protein, putative, expressed	1.25467	3.96029	1.4244	0.722678	1.24516	1.11308	0	0	0.0372534	0.0781304	0.0426917	0.163511
LOC_Os03g02860	heavy metal-associated domain containing protein, expressed	1.47652	2.27136	1.47023	1.89288	2.69888	1.44069	0.884369	0.605749	1.27501	1.54039	0.714745	0.631075
LOC_Os07g10820	transporter-related, putative, expressed	10.7181	18.6383	8.83711	12.312	11.2039	11.2749	4.98262	2.53689	6.58024	6.85027	7.45878	10.195
LOC_Os03g02670	transporter family protein, putative, expressed	14.6665	3.47256	18.0635	12.4075	16.4494	15.7959	16.4902	14.0639	7.87728	14.702	13.1996	7.81315
LOC_Os04g57840	transposon protein, putative, unclassified, expressed	0.102291	0.0837604	0.79535	0.124876	0.155888	0.629009	19.256	15.7598	5.28132	4.98205	8.12384	6.69517
LOC_Os08g43250	MATE efflux family protein, putative, expressed	0.209198	0.433892	0.821848	0.563113	0.535808	0.581219	3.092	1.85892	7.38273	4.49203	7.32849	10.5691
LOC_Os02g24430	expressed protein	3.78905	4.04134	5.11519	4.19096	5.58246	6.25459	56.5044	37.5363	18.1861	19.8632	26.5785	14.7464
LOC_Os04g16450	OsPIP2;6	101.756	195.987	59.2936	71.0317	71.2477	42.64	33.4895	21.2762	30.8342	27.4514	29.1089	67.6248
LOC_Os04g47320	uncharacterized mscS family protein, putative, expressed	1.15449	0.707094	5.10044	2.2093	3.44133	3.70733	45.7576	45.3857	18.8729	19.6198	20.3535	16.1801
LOC_Os07g26690	aquaporin protein, putative, expressed	205.065	305.332	137.341	103.486	130.721	126.994	282.411	118.143	107.405	100.041	184.001	389.148
LOC_Os07g26630	OsPIP2;4	4.6103	15.0711	2.25628	0.802997	1.38734	1.20222	4.01889	5.79005	0.489027	0.212043	0.219971	1.05734
LOC_Os07g26660	OsPIP2;5	1.64764	1.62608	1.98528	0.677664	0.824567	0.68838	4.56042	3.63437	4.8049	2.02295	5.73572	11.0573
LOC_Os04g47220	OsPIP1;2	510.693	734.113	355.083	388.956	375.893	402.693	302.736	198.381	227.124	216.154	362.352	632.186
LOC_Os02g24720	LTPL21 - Protease inhibitor/seed storage/LTP family protein precursor, expressed	4.89828	7.39207	6.65871	5.55885	7.01	4.7832	3.82531	1.90582	2.76551	4.74859	6.36066	6.71033
LOC_Os10g02100	peptide transporter PTR2, putative, expressed	0.870055	1.68451	0.356595	0.27492	0.638196	0.220379	0.100626	0.0695028	0.138023	0.365331	0.255396	0.144995
LOC_Os02g08180	protein transport protein SEC61 subunit gamma, putative, expressed	279.878	194.861	304.882	196.431	207.632	200.913	238.854	136.879	155.039	189.226	296.898	281.49
LOC_Os11g37130	mttA/Hcf106 family protein, putative, expressed	21.8166	21.0555	14.2715	22.9306	22.9449	23.0231	12.4781	8.14162	15.0609	12.5208	13.0423	12.2304
LOC_Os07g10590	transporter family protein, putative, expressed	104.954	20.7756	154.867	66.43	95.8261	83.0399	139.564	114.399	61.3472	108.317	117.595	79.7721
LOC_Os06g37010	metal cation transporter, putative, expressed	3.68132	4.57478	4.06083	3.30505	3.23484	2.77493	7.9834	4.50408	4.29963	5.5947	5.2491	7.62377
LOC_Os07g39350	transporter family protein, putative, expressed	1.12541	3.37983	3.42289	5.71694	4.74494	3.02055	2.92393	0.821457	2.94399	6.75652	12.983	13.1106
LOC_Os03g02390	mitochondrial import inner membrane translocase subunit Tim17, putative, expressed	14.2628	8.98323	12.4034	8.52204	11.586	11.4119	18.2448	22.906	13.6678	16.3384	14.2319	12.1701
LOC_Os01g47730	ras-related protein, putative, expressed	5.14556	7.94049	5.8317	3.21508	4.16614	2.56301	5.40309	19.7265	6.30254	6.16769	7.71953	9.69215
LOC_Os10g19190	vesicle transport protein GOT1B, putative, expressed	7.23562	4.81438	6.72031	6.19725	6.60861	8.11457	7.92099	11.2213	6.88522	9.92027	6.67556	5.14497
LOC_Os01g50080	MDR-like ABC transporter, putative, expressed	6.43061	11.7879	5.51719	6.4741	7.25973	6.51188	4.82845	4.42143	5.73284	5.96569	4.36547	4.71211
LOC_Os05g48040	OsMATE2	6.86016	15.1471	7.16185	8.33482	6.8368	6.29227	4.00274	3.25789	5.68276	3.59409	2.32609	3.01279
LOC_Os09g38960	potassium transporter, putative, expressed	14.4019	20.3289	13.7846	20.1039	17.5926	21.0157	13.1454	7.89355	16.2678	14.9855	15.6314	18.3583
LOC_Os01g73130	vacuolar ATP synthase, putative, expressed	1.59584	3.60263	2.30938	0.93057	2.00485	0.864801	1.41318	0.774945	0.502891	1.04562	0.809696	0.773013
LOC_Os01g50100	ABC transporter, ATP-binding protein, putative, expressed	0.0745254	0.114435	0.0657481	0.144778	0.116392	0.149677	0.123343	1.02537	0.196606	0.24383	0.392383	0.271219
LOC_Os05g16290	transposon protein, putative, unclassified, expressed	1.62498	0.0102075	13.9227	6.72281	11.0238	22.4411	92.0398	158.8	47.4011	43.8299	50.3149	38.1629
LOC_Os01g50160	MDR-like ABC transporter, putative, expressed	0.182906	0.663296	0.42835	0.601191	0.418941	0.422933	0.430278	0.237135	0.728945	0.985487	1.11023	0.855228
LOC_Os05g16280	transposon protein, putative, unclassified, expressed	0.254212	0	1.77592	0.949071	1.57732	2.14573	13.0262	12.8883	4.46573	6.32252	7.40345	4.54808
LOC_Os11g04060	major facilitator superfamily antiporter, putative, expressed	3.73998	1.14039	4.82222	2.89902	4.35934	4.28854	8.7962	9.09824	4.15755	6.94131	6.34593	3.62376
LOC_Os03g63110	prefoldin, putative, expressed	5.54029	6.11376	4.78853	6.72919	6.14879	5.62356	4.11288	2.42698	5.74579	5.21094	4.98574	4.84903
LOC_Os07g33310	MATE efflux family protein, putative, expressed	5.51091	11.8258	7.2463	5.60908	4.69517	2.71519	2.80272	2.73324	5.55611	3.91481	3.91958	4.04605
LOC_Os02g57570	MATE efflux family protein, putative, expressed	4.6329	1.55112	6.21915	2.88145	4.34672	3.93075	5.64924	4.5327	3.06661	4.67193	3.31594	3.05286
LOC_Os02g57580	anthocyanin permease, putative, expressed	14.8065	2.19567	14.9573	7.59489	8.95928	10.3038	14.5441	10.9284	6.33537	8.91996	8.72954	6.59163
LOC_Os02g57620	Citrate transporter protein, putative, expressed	16.7182	27.3739	19.5739	18.8061	16.1736	13.5833	7.35232	3.84599	13.2448	10.5501	12.9378	17.2833
LOC_Os02g57720	RWC3|OsPIP1;3	10.2507	9.40189	5.08102	3.34906	3.56946	4.45412	13.636	8.25305	6.05708	3.92808	6.03512	12.408
LOC_Os02g44080	aquaporin protein, putative, expressed	0.0182516	0.116279	0.100081	0	0.0863438	0.0701568	5.5017	2.76273	2.06906	1.7294	2.72191	1.48292
LOC_Os10g36924	OsNIP3;1|DTE1	3.83723	4.60982	1.74934	2.08779	4.23157	3.17876	2.5815	1.07423	1.4625	2.37573	2.89778	4.09523
LOC_Os02g20850	ras-related protein, putative, expressed	26.7358	30.7498	19.3236	24.0208	22.9635	23.6874	3.44526	2.45158	9.43869	10.1785	8.32871	12.9405
LOC_Os04g57200	heavy metal transport/detoxification protein, putative, expressed	4.57205	8.37371	6.61278	7.60868	6.72337	4.12452	13.7381	44.5095	12.5011	12.6548	16.3617	16.381
LOC_Os05g25550	E1-E2 ATPase domain containing protein, expressed	47.7675	0.724467	93.0219	46.4677	61.0545	59.5039	195.436	268.699	100.142	105.857	107.784	86.5933
LOC_Os03g02070	heavy-metal-associated domain-containing protein, putative, expressed	64.7396	42.599	36.6241	59.0171	53.3582	53.4096	28.1774	13.4727	18.3395	21.3656	23.7599	26.9662
LOC_Os06g15370	peptide transporter PTR2, putative, expressed	4.77967	7.97327	3.9017	4.84805	4.54939	3.3568	2.06392	0.683817	2.69509	3.3524	3.14126	4.73256
LOC_Os04g39430	D11|CPB1|CYP724B1|GNS4|PMM1	5.61543	7.835	5.25993	12.3254	8.84007	6.58498	3.95334	0.748037	3.98293	4.54435	4.9162	7.48583
LOC_Os03g02050	LTP2|nsLTP2	2.49586	4.05372	2.17561	2.89292	4.27256	3.50315	1.74867	1.14064	1.38792	2.86024	2.67323	3.78376
LOC_Os10g08879	nucleotide-sensitive chloride conductance regulator containing protein, expressed	6.45318	7.41444	6.04836	8.00335	3.48679	5.99539	5.03613	3.66095	5.37996	5.93122	7.14983	4.28262
LOC_Os01g70940	OsHAK2	16.0151	12.4558	17.635	17.9423	18.2052	22.6974	35.1436	42.0467	27.3823	32.2681	29.1022	20.9642
LOC_Os03g18190	importin subunit beta, putative, expressed	0.89726	1.19115	1.16653	2.40766	1.71802	2.39685	1.72271	2.56574	3.34442	1.93175	2.16581	1.89178
LOC_Os04g52530	heavy metal-associated domain containing protein, expressed	5.25578	6.07442	6.64955	6.56881	6.79439	5.11688	2.54773	4.85476	3.51198	2.54032	1.2174	2.42483
LOC_Os06g36450	ferroportin1 domain containing protein, expressed	1.87808	2.13346	3.58799	2.70153	3.30189	2.87167	5.26575	3.87982	2.40551	3.46683	4.89617	4.17941
LOC_Os03g18160	mitochondrial carrier protein, putative, expressed	21.5402	11.6821	18.4763	22.8188	22.4714	31.7229	24.8948	21.7926	23.0992	28.157	30.5695	28.3181
LOC_Os07g41330	mitochondrial import inner membrane translocase subunit Tim17, putative, expressed	41.1595	31.4009	44.8507	36.5139	44.5812	37.5918	47.523	57.3206	47.7135	53.5281	37.6776	25.9616
LOC_Os08g43654	MATE efflux family protein, putative, expressed	2.91828	5.27604	2.49811	3.60249	2.64841	1.65662	2.32647	1.6617	3.10218	3.04187	2.26583	2.65095
LOC_Os02g44310	RCc3	0.233475	0.971682	0.448838	0.384863	0.254481	0.205719	0.0601577	0.0306361	0.185881	0.190687	0.123389	0.085074
LOC_Os02g44320	LTPL113 - Protease inhibitor/seed storage/LTP family protein precursor, expressed	224.595	373.148	185.778	109.906	97.9124	109.174	13.9238	12.4631	24.4619	27.9353	18.6823	77.2317
LOC_Os08g43690	transporter, monovalent cation:proton antiporter-2 family, putative, expressed	0.104657	0.0429845	0.494957	0.165293	0.26117	0.241436	4.68491	3.33821	1.023	1.62122	2.25859	1.66276
LOC_Os07g41180	RNA-binding protein-like, putative, expressed	53.6324	25.9673	44.0064	36.9217	47.2323	61.4955	36.0892	43.2395	31.7384	46.3445	32.7168	22.9765
LOC_Os07g37320	OsMST6	6.37178	44.8032	6.71667	4.82274	6.24036	4.52439	10.9129	10.6736	3.33887	4.96792	9.88906	14.4304
LOC_Os08g15170	ATP synthase epsilon chain, mitochondrial, putative, expressed	52.2191	56.1449	95.0044	44.2877	56.9892	47.5579	131.139	121.161	77.9076	124.564	110.902	105.54
LOC_Os07g41250	OsNPF7.1	14.0068	14.7024	10.5047	13.844	12.3039	13.1853	7.07876	3.53214	7.48697	8.5829	9.78604	12.0159
LOC_Os11g01820	ATCHX, putative, expressed	0	0	0.00728341	0	0	0.0191463	2.4629	2.06613	0.459195	0.42248	0.817321	0.809489
LOC_Os05g37820	transporter, major facilitator family, putative, expressed	7.77083	8.51478	5.81428	6.37756	5.80251	6.61153	4.34411	3.36807	3.97239	4.77521	5.26442	6.11391
LOC_Os03g18350	importin subunit beta, putative, expressed	6.64543	4.25299	5.3025	5.09369	6.74614	8.64954	6.16823	8.11528	5.10024	6.42707	4.36477	3.94035
LOC_Os02g57360	heavy metal-associated domain containing protein, expressed	10.0107	3.01785	13.1387	3.7859	8.13126	6.96387	4.57331	4.92696	4.31598	7.11141	5.29062	2.9791
LOC_Os03g20949	phospholipid-transporting ATPase, putative, expressed	4.76459	5.23614	5.10505	8.24468	6.51751	6.30968	9.71164	11.096	7.64708	6.36952	7.49246	8.54591
LOC_Os03g20970	phospholipid-transporting ATPase 1, putative, expressed	0.0182376	0.13471	0.0344028	0.0774644	0.0233304	0.0236958	0.0922577	0.150622	0.0665207	0.158497	0.182661	0.219474
LOC_Os07g26460	GLTP domain containing protein, putative, expressed	0.779348	0.0979117	1.47033	0.685452	1.27456	1.12769	4.38745	2.56984	1.23121	2.50964	1.8503	1.69127
LOC_Os03g06080	heavy metal-associated domain containing protein, expressed	0.022737	0	0	0	0	0	0.0291145	2.27486	0	0	0	0.0544216
LOC_Os01g58010	ATP synthase, A subunit family protein, putative, expressed	1.31387	1.63178	0.925183	1.4263	1.35422	1.03913	2.66135	5.13881	2.93142	4.82153	1.79403	1.11878
LOC_Os02g44630	OsPIP1;1|RWC1	427.269	688.563	393.777	422.809	370.524	336.151	360.52	148.631	389.167	308.561	504.453	678.672
LOC_Os07g37530	organic cation transporter-related, putative, expressed	0.27878	0.483868	0.138952	0.180634	0.151011	0.166974	0.0660257	0.0363729	0.0367723	0.0615288	0.0561381	0.177519
LOC_Os12g12934	peptide transporter PTR3-A, putative, expressed	1.07984	2.55145	0.922447	0.574402	0.643032	0.653337	2.54968	0.724099	0.772988	0.574404	0.538386	0.74736
LOC_Os01g21850	protein transport protein-related, putative, expressed	21.7098	17.6329	18.4924	23.5714	24.9119	26.7506	38.242	45.0417	31.8231	33.9868	29.0221	25.0079
LOC_Os01g61510	ammonium transporter protein, putative, expressed	1.07903	0.813974	0.873897	0.751165	0.747081	0.50691	1.11509	1.9271	0.95387	1.35757	0.958063	1.18734
LOC_Os03g20750	outer mitochondrial membrane porin, putative, expressed	35.842	22.9932	29.5021	34.6531	35.8511	41.5004	36.5345	44.8465	34.0372	44.9435	33.9496	25.6277
LOC_Os02g44770	uncharacterized mscS family protein, putative, expressed	5.9135	0.747392	8.41099	8.81836	8.64659	10.4296	26.3338	65.1273	19.2602	11.9979	11.4658	13.3681
LOC_Os02g44680	allantoin permease, putative, expressed	0.936565	1.28904	0.715919	0.714112	0.613986	0.375344	0.302018	0.0394022	0.569703	0.397833	0.522873	0.705805
LOC_Os12g44150	plasma membrane ATPase, putative, expressed	78.8734	104.708	79.9086	120.7	97.777	105.162	68.1482	38.8607	112.62	87.2696	103.69	126.361
LOC_Os12g44110	ligA, putative, expressed	0.482785	1.11036	0.946746	0.954409	0.584114	0.503769	3.48449	0.763396	1.8461	1.38479	2.0718	3.14213
LOC_Os12g44100	OsNPF2.2	3.07479	6.88586	2.86656	3.63866	3.13616	2.15566	2.79604	1.20076	2.74013	2.30512	3.31336	4.90132
LOC_Os03g24870	transporter family protein, putative, expressed	0.694193	1.62648	1.54072	1.3333	0.972139	0.795437	1.61974	1.39289	1.9517	1.20854	0.89531	0.82934
LOC_Os01g19770	mitochondrial import inner membrane translocase subunit Tim17, putative, expressed	1.42555	0.0684232	2.15843	0.599093	0.966366	0.991363	1.64978	1.87301	0.759382	1.80547	1.15367	0.822968
LOC_Os03g06960	vesicle-associated membrane protein, putative, expressed	3.48237	1.16137	10.6288	3.49659	7.24564	7.14963	85.4173	61.2781	29.9418	37.7071	48.9068	26.3249
LOC_Os02g37300	heavy metal associated domain containing protein, expressed	1.89195	0.975382	2.11549	2.37737	1.94523	1.50657	4.74511	27.0535	7.19002	8.56057	7.36184	9.11284
LOC_Os08g31670	transporter, putative, expressed	1.51464	1.00201	1.73996	1.17802	1.43564	1.46917	1.97645	2.11247	1.56017	2.17939	1.43633	1.06967
LOC_Os02g37290	heavy metal associated domain containing protein, expressed	17.9836	3.12924	21.7197	11.6214	14.1487	13.5371	16.0325	21.5032	10.5435	14.0937	13.5638	20.5782
LOC_Os02g37280	heavy metal transport/detoxification protein, putative, expressed	17.0918	3.63562	10.2833	9.70685	12.1142	13.3022	4.11876	3.94394	4.9678	4.00507	2.72746	6.73924
LOC_Os01g19850	OsCCC2	8.0181	7.38063	7.4733	9.23198	8.26269	11.3005	14.3589	13.4839	10.5311	10.5674	10.3566	9.43127
LOC_Os08g31340	heavy metal-associated domain containing protein, expressed	5.28701	5.34456	4.16629	6.51771	5.83138	3.97538	2.55983	1.52442	3.07432	2.78516	2.76461	3.05944
LOC_Os01g70710	heavy metal-associated domain containing protein, expressed	5.74827	9.9386	10.4317	7.01178	7.22655	5.79534	12.5039	10.2663	9.80875	9.01555	9.55581	10.3658
LOC_Os10g36070	LTPL155 - Protease inhibitor/seed storage/LTP family protein precursor, putative, expressed	3.27795	13.5042	5.86853	5.85404	9.24074	4.17575	1.06654	0.297236	0.234335	0.84016	1.71291	1.89967
LOC_Os10g36200	heavy metal-associated domain containing protein, expressed	136.188	117.61	86.3835	153.424	163.207	159.485	49.3116	30.2565	66.847	72.9586	72.5226	79.0073
LOC_Os10g36170	LTPL160 - Protease inhibitor/seed storage/LTP family protein precursor, expressed	194.364	263.151	419.305	343.163	397.133	241.659	649.21	340.738	655.956	604.135	867.009	1025.54
LOC_Os10g36160	OsLTPL159	0.0446199	1.06779	0.685112	0.0716297	0.117249	0.50855	0.0406986	0.042295	0.0362715	0.224222	0.170346	0.197484
LOC_Os01g70660	potassium transporter, putative, expressed	22.5986	37.3925	22.3411	26.0022	22.4441	21.1694	6.87365	4.34161	19.7349	14.7221	18.69	27.5465
LOC_Os10g36110	LTPL158 - Protease inhibitor/seed storage/LTP family protein precursor, expressed	0.604838	2.81138	2.2107	2.07186	2.77195	1.28763	9.35994	1.84556	2.05478	2.37475	6.00967	8.38501
LOC_Os06g07830	ANTH/ENTH domain containing protein, putative, expressed	40.1257	44.6771	28.8133	42.9887	37.2696	37.5006	16.7639	15.0815	33.5961	30.8073	28.4666	35.6756
LOC_Os08g31410	sulfate transporter, putative, expressed	2.40578	3.72358	2.65047	2.59867	2.90423	3.74946	9.3017	9.59193	3.92628	5.00367	5.69395	4.68188
LOC_Os11g28430	expressed protein	3.64326	3.71174	3.45979	5.18824	5.20483	6.51587	7.60417	7.78649	5.93731	7.86865	5.95653	4.76003
LOC_Os11g28610	transporter family protein, putative, expressed	7.54149	1.25996	19.5158	7.01483	10.7966	7.4793	88.6452	90.2175	30.6109	34.3205	42.1363	35.8409
LOC_Os01g61070	OsATX	20.2919	8.86928	15.7172	20.4987	21.3586	23.4137	28.8372	19.4655	17.8335	16.742	13.4221	14.6062
LOC_Os11g24450	mitochondrial carrier protein, putative, expressed	13.932	12.1729	18.8123	11.6926	16.1496	17.426	59.5613	58.2443	32.3842	40.9677	43.8018	29.8159
LOC_Os04g35540	amino acid permease family protein, putative, expressed	48.59	14.5371	53.8666	30.6214	30.965	27.075	30.1591	15.1035	17.8307	16.7359	29.0078	41.5961
LOC_Os05g44070	ras-related protein, putative, expressed	22.7725	34.9698	25.2658	14.5732	16.4833	11.1424	9.13907	5.11919	16.4777	15.3799	17.9003	22.2357
LOC_Os01g61190	exo70 exocyst complex subunit, putative, expressed	4.50294	5.86755	3.66214	5.71539	5.18966	6.22378	2.49318	1.33962	3.92041	3.60609	3.37235	3.80396
LOC_Os03g06520	sulfate transporter, putative, expressed	9.88553	13.9266	6.67824	8.05915	9.5659	11.5962	10.3244	24.0721	6.60434	6.39824	7.88938	13.4064
LOC_Os01g65500	OsCLC1	4.24201	2.4652	5.33441	3.83366	4.27182	3.68718	8.25912	6.57883	3.66299	4.67108	4.39675	3.98519
LOC_Os08g31700	UNE2, putative, expressed	4.53857	6.21425	5.71978	7.09758	6.12423	5.77638	5.90244	3.81421	10.196	8.12365	10.5882	11.4295
LOC_Os01g61390	OsYSL18	3.01744	0.00954137	10.2068	4.62959	7.93981	6.46022	47.8369	48.4931	19.0655	23.1433	26.3939	17.4957
LOC_Os01g54590	ras-related protein, putative, expressed	14.5952	17.2695	9.15113	11.0624	12.3524	11.8277	2.76029	2.75511	6.03792	5.15563	3.60708	6.30631
LOC_Os01g65860	ANTH domain containing protein, expressed	0.613307	1.36382	0.79212	0.760168	0.764316	0.829015	2.23837	2.19576	1.26526	0.855445	1.9946	0.957218
LOC_Os07g06190	ethylene-insensitive protein 2, putative, expressed	0.822214	1.08952	0.819912	0.861905	0.738838	1.19121	0.510012	0.320311	1.0724	0.562154	0.67235	1.10611
LOC_Os01g70240	expressed protein	3.06775	6.55035	6.94974	5.42292	4.11109	3.42918	2.04269	1.15219	3.90569	3.29024	2.10482	2.68816
LOC_Os11g12740	SP1	1.86989	3.71709	0.955862	1.27692	1.26397	1.16299	2.22491	1.02206	1.15836	1.07634	0.715018	1.06414
LOC_Os01g02190	aquaporin protein, putative, expressed	89.1063	93.5003	85.1131	47.6044	73.0864	49.9296	4.23929	2.9489	2.31755	3.27728	0.17375	5.01294
LOC_Os09g11250	co-chaperone GrpE protein, putative, expressed	13.1448	10.0747	11.2635	13.5439	13.5762	15.8492	11.116	21.6504	10.9316	9.63455	7.5623	9.4769
LOC_Os04g41450	TGF-beta receptor, type I/II extracellular region, putative, expressed	0.746573	0.807776	1.04532	0.9515	0.864198	0.992869	1.1138	1.35441	0.927274	0.919722	1.09047	0.781101
LOC_Os03g06760	exocyst complex component 6, putative, expressed	8.7567	1.70338	11.5112	9.66328	12.5139	16.3944	24.9416	30.4835	15.558	23.7261	19.9972	11.6682
LOC_Os10g42960	OsDUR3	5.56109	1.95944	12.0397	6.37903	8.97845	4.50711	12.6987	14.0824	7.8334	10.1994	11.144	8.31285
LOC_Os10g42900	peptide transporter PTR2, putative, expressed	1.8603	2.45672	1.66241	0.867478	1.06213	0.973691	0.933696	0.793275	1.25129	0.610116	0.584428	1.15374
LOC_Os08g36340	potassium transporter, putative, expressed	0.281171	2.10462	0.681161	1.34805	1.03859	1.24014	0.274685	0.102932	0.62348	0.641637	0.243926	0.464311
LOC_Os11g05700	ABC transporter family protein, putative, expressed	8.33899	6.77942	6.57638	13.6933	9.72586	12.2198	9.26966	6.77374	15.5215	14.2536	16.6266	14.9464
LOC_Os10g20470	MATE efflux family protein, putative, expressed	3.15343	3.17931	3.36432	3.46092	2.92048	3.34516	5.92874	4.39325	3.64158	3.57129	5.99804	6.3634
LOC_Os03g39710	OsMST2	1.41279	4.52163	2.05485	4.08475	2.70729	1.84684	0.910492	0.438348	2.70986	2.67593	2.31402	2.54778
LOC_Os11g48040	OsUCP2	46.9494	35.4887	51.163	37.1763	45.2993	48.7781	64.7283	61.3739	53.4478	59.7804	61.7282	50.7947
LOC_Os07g06130	OsEIN2	1.28328	2.78363	1.87926	2.94414	2.55893	2.35467	1.17647	0.933632	2.59759	1.51182	2.16549	2.8901
LOC_Os12g05040	heavy-metal-associated domain-containing protein, putative, expressed	10.4991	23.0058	11.6786	11.9868	10.8665	8.64548	9.17539	4.75104	11.6848	10.1529	9.35024	13.1706
LOC_Os06g50060	OsPRA2	4.94706	10.7382	4.39022	4.9694	5.67573	4.15088	1.18374	1.16885	1.2559	1.88092	1.0413	3.43402
LOC_Os08g36410	ANTH domain containing protein, expressed	5.32918	7.06547	3.81791	5.76047	5.18064	4.03304	13.2113	11.3793	7.31856	8.80035	6.42841	9.78369
LOC_Os05g40010	LTPL17 - Protease inhibitor/seed storage/LTP family protein precursor, expressed	663.863	269.812	539.091	438.523	415.105	333.6	138.312	116.644	140.315	156.914	98.9173	208.124
LOC_Os11g05880	exo70 exocyst complex subunit, putative, expressed	9.03911	6.70495	8.2921	8.79189	8.56416	10.6156	15.3663	14.8418	9.47311	13.5832	11.6279	9.10418
LOC_Os07g15460	OsNRAMP1	14.2736	7.98026	20.191	13.3258	20.5894	21.9223	27.6148	32.6203	19.1842	25.1064	22.2456	14.5038
LOC_Os03g29920	proline-rich protein, putative, expressed	73.5773	115.854	66.8923	68.5563	70.2797	40.4715	27.5192	21.3425	43.2013	46.4129	34.0778	52.5399
LOC_Os09g35600	MATE domain containing protein, expressed	1.01282	2.20501	2.38579	1.56136	1.03607	0.625034	2.50674	1.04904	2.95756	2.84129	2.93168	4.08003
LOC_Os11g05556	signal recognition particle 54 kDa protein, putative, expressed	5.02872	7.39182	5.69077	5.96273	6.51194	5.34803	3.51898	2.63022	6.23841	5.44477	5.55747	5.12457
LOC_Os11g05552	YGL138(t)	5.12029	7.2819	4.78303	5.77909	5.70518	4.85552	2.82242	2.34308	5.07376	4.72361	3.21543	3.13917
LOC_Os07g15370	OsNRAMP5	7.84365	15.8662	12.3008	24.2425	31.2326	16.0221	5.41225	2.76351	10.4947	14.0326	14.1842	10.7356
LOC_Os03g29850	metal cation transporter, putative, expressed	23.2718	18.5994	27.8541	24.0537	18.7422	16.9765	12.8531	9.33412	10.2172	9.66089	20.3955	23.4111
LOC_Os10g42870	OsNPF7.7	22.4717	25.8788	24.2422	25.8909	22.5496	21.7668	14.4773	9.08029	20.4881	18.4336	23.6484	26.625
LOC_Os07g01750	MATE efflux family protein, putative, expressed	0.386792	0.803853	0.383178	0.424623	0.737422	0.490009	0.525117	0.0779078	0.579759	0.473737	0.702858	0.549722
LOC_Os06g08310	plasma membrane ATPase, putative, expressed	0.585137	0.628396	0.831192	0.480711	0.509874	0.73553	54.6396	30.4267	18.7455	12.3414	29.2149	14.4452
LOC_Os04g30800	ER lumen protein retaining receptor, putative, expressed	12.8495	13.9998	7.2565	10.4037	10.0716	13.0502	3.64597	3.75842	6.07522	7.39738	4.76635	6.96612
LOC_Os10g20880	LTPL136 - Protease inhibitor/seed storage/LTP family protein precursor, putative, expressed	1.05452	0.061097	2.15611	1.01564	0.74514	0.732094	1.93617	0.279554	0.563711	1.46164	2.25268	2.96177
LOC_Os08g32500	nucleobase-ascorbate transporter, putative, expressed	1.89872	3.18245	1.31341	1.72025	2.18172	2.10307	1.36987	0.980559	1.8797	1.45237	1.4193	1.22493
LOC_Os10g20830	LTPL133 - Protease inhibitor/seed storage/LTP family protein precursor, expressed	1.08583	1.05416	1.17128	0.560289	0.792585	0.68814	0.10587	0	0.186025	0.197717	0.249085	0.199041
LOC_Os08g23130	oligopeptide transporter, putative, expressed	0.0435347	1.12239	0.177155	0.103431	0.0685585	0.0305893	4.30543	1.89454	0.707563	0.49032	2.19901	1.12505
LOC_Os03g01700	Lsi2|OsLsi2	0.0117451	0	0.0208192	0.103817	0.0515671	0.0547866	0.0651485	0	0.39694	0.15704	0.18258	0.104651
LOC_Os07g01560	OsMST3	0.746201	3.13334	1.69169	1.40646	1.02697	0.756806	1.58771	0.532522	1.33078	1.88698	3.23457	2.36906
LOC_Os08g36560	emp24/gp25L/p24 family protein, putative, expressed	0	0	0.0476574	0.0393088	0.154599	0.0579247	3.66086	2.66269	0.870895	0.883785	2.07526	0.825274
LOC_Os04g48290	MATE efflux family protein, putative, expressed	0.018844	0.0260438	0.00558826	0.0230465	0	0.0135844	0.102869	2.80618	0.140119	0.0712396	0.168266	0.146625
LOC_Os05g40330	auxin efflux carrier component, putative, expressed	4.6865	5.34096	3.59024	3.78408	4.91315	4.14702	2.53567	1.37069	1.84819	3.68054	4.70095	4.79954
LOC_Os12g44300	CHX28, putative, expressed	0.00730329	0.019447	0.0269191	0.0132126	0.00861434	0.0140365	3.06813	2.2863	0.886992	0.623941	0.756045	0.804684
LOC_Os07g01310	glutamate receptor, putative, expressed	8.11349	10.1923	6.98853	8.53631	7.8343	7.35495	9.6793	4.9974	9.39987	6.5116	8.92494	13.6836
LOC_Os12g44380	OsSUT2|OsSUT2M	19.8142	19.1996	11.101	17.5582	16.149	17.2188	11.1816	7.78578	14.2197	11.1296	10.8609	15.4341
LOC_Os04g30490	MATE efflux family protein, putative, expressed	0.887041	2.15247	0.795366	0.73197	1.12458	0.720307	2.56024	1.97433	0.887557	1.30855	1.35308	0.762821
LOC_Os05g07870	triose phosphate/phosphate translocator, non-green plastid,chloroplast precursor, putative, expressed	19.5131	5.50688	20.5146	16.7138	20.148	27.8062	54.5815	63.9042	30.7842	45.1942	42.0522	30.6471
LOC_Os05g40230	vacuolar ATP synthase subunit E, putative, expressed	6.15281	0.488545	18.3385	5.8193	11.8181	6.95583	107.777	92.9282	46.2848	60.0811	61.491	32.775
LOC_Os04g48530	C4-dicarboxylate transporter/malic acid transport protein domain containing protein, expressed	0.620421	0.820941	0.444443	0.306602	0.61219	0.437702	2.44575	0.58152	0.75896	0.636895	2.59335	4.69665
LOC_Os04g52260	LTPL124 - Protease inhibitor/seed storage/LTP family protein precursor, expressed	10.371	40.1896	17.8553	3.14328	2.92654	1.93954	16.7468	19.1803	6.00074	3.0872	4.3991	6.1167
LOC_Os03g01320	qLTG3-1	398.744	614.512	315.227	310.114	288.502	212.525	80.0718	74.6721	166.118	133.674	82.0882	146.026
LOC_Os03g01300	Ltp1	1.18646	2.80152	1.83931	1.0659	1.03085	0.396116	1.9489	0.665216	0.927376	1.56418	2.0576	3.45539
LOC_Os09g28160	phosphate carrier protein, mitochondrial precursor, putative, expressed	3.40306	0.337031	1.80621	1.99197	2.65761	3.44618	3.22983	2.06622	2.09949	3.92536	3.30359	3.45363
LOC_Os06g42030	OsHAK10	7.87704	9.75851	13.2181	14.3555	11.4852	11.9812	19.6202	9.48166	22.011	16.746	25.1786	27.8678
LOC_Os04g56570	heavy metal-associated domain containing protein, expressed	0	7.39077	0	0	0	0.0412246	0.107718	0.054857	0	0.0960767	0.059204	0.0507778
LOC_Os01g37690	OsCAX1a	44.34	79.369	36.1691	35.5205	36.5812	38.6798	52.2443	21.4225	37.8558	34.7722	52.3106	77.7268
LOC_Os03g43970	amino acid permease family protein, putative, expressed	1.21067	0.0782905	2.45258	0.986458	2.12386	1.13138	3.42298	3.49798	1.94779	2.51486	2.29763	1.85363
LOC_Os10g42299	mitochondrial carrier protein, putative, expressed	13.4265	12.1119	14.828	8.54236	11.0553	8.03892	17.6277	12.783	10.8448	13.1815	15.6054	15.6256
LOC_Os03g01290	peptide transporter PTR2, putative, expressed	0.688822	0.998179	0.481905	0.734231	0.902314	0.291638	0.457126	0.194848	0.479745	0.536972	0.513767	0.937351
LOC_Os06g03560	oligopeptide transporter, putative, expressed	0.427539	2.01175	0.939394	0.684126	0.454061	0.589908	0.26586	0.19464	0.315468	0.288279	0.356494	0.57877
LOC_Os06g03540	oligopeptide transporter, putative, expressed	11.4684	12.049	11.3346	12.7233	10.4113	9.73438	12.9961	6.18631	14.4467	11.0409	16.8752	17.9316
LOC_Os07g38400	transporter family protein, putative, expressed	15.6645	9.51636	13.1491	13.9256	15.2498	18.9689	17.6202	20.0051	14.5532	17.6241	14.2554	11.741
LOC_Os10g17280	ATP synthase gamma chain, putative, expressed	215.287	156.383	166.27	199.606	216.789	228.253	265.053	302.602	245.503	294.565	233.747	201.924
LOC_Os03g59380	LTPL28 - Protease inhibitor/seed storage/LTP family protein precursor, expressed	4807.8	6731.79	4776.81	6065.2	5650.72	5102.64	1709.29	1266.84	1800.22	1643.12	1512.48	2662.38
LOC_Os04g52390	potassium transporter, putative, expressed	12.0031	19.2576	14.3242	22.3983	16.1378	15.8793	12.2059	6.8934	17.1195	15.142	17.7128	19.7828
LOC_Os04g52310	OsZIP3	0.225787	1.31535	2.83841	3.53356	2.48208	1.1923	0.185385	0.290447	1.46078	2.95068	1.57244	0.729908
LOC_Os03g59600	mitochondrial Rho GTPase 1, putative, expressed	10.2914	5.69914	10.6192	5.52118	8.56462	9.56157	10.761	11.2069	7.90304	8.53855	8.05356	5.09363
LOC_Os05g49260	transporter family protein, putative, expressed	3.23777	4.83512	2.99375	4.6198	4.24104	4.58584	2.54353	1.92739	3.38632	3.42651	4.05772	4.21441
LOC_Os01g42234	amino acid permease family protein, putative, expressed	14.9204	8.39465	31.9091	24.7011	20.761	15.8674	43.7306	25.7066	44.069	37.7583	57.5674	54.7987
LOC_Os03g64150	MATE efflux family protein, putative, expressed	2.72434	9.67746	3.89853	3.07127	2.4521	2.18779	4.05829	3.65149	5.98635	4.21533	3.96329	6.14568
LOC_Os03g59590	ATP/GTP/Ca++ binding protein, putative, expressed	50.3069	33.7719	50.1176	54.9096	60.3267	65.5806	70.8307	96.1214	67.6249	81.3226	58.3631	48.7025
LOC_Os02g09720	multidrug resistance protein, putative, expressed	0.394641	0.767063	0.548477	0.773043	0.492657	0.451994	0.960073	0.409432	0.878949	0.905125	0.857238	1.15156
LOC_Os01g07730	phosphate/phosphoenolpyruvate translocator-related protein, putative, expressed	7.18581	6.40462	6.73298	6.89884	6.38456	6.51477	2.80843	2.33434	3.60337	3.56925	2.54954	2.89001
LOC_Os04g56160	plasma membrane ATPase, putative, expressed	138.384	251.414	162.072	204.897	178.847	142.679	109.345	84.4494	199.664	152.878	140.176	154.076
LOC_Os01g74450	aquaporin protein, putative, expressed	74.7064	12.1081	161.193	54.1112	91.2043	61.9914	266.046	258.051	112.465	146.475	180.193	124.037
LOC_Os03g59450	transporter-related, putative, expressed	5.21586	6.20472	7.87109	6.43838	7.30459	7.70101	12.6817	10.1446	6.14114	10.3183	10.9038	8.2203
LOC_Os02g40890	GLTP domain containing protein, putative, expressed	134.416	155.132	100.372	140.079	144.189	170.629	59.2081	56.899	94.9198	109.087	105.129	107.385
LOC_Os05g19500	OsCHX14	0.063157	0.00966723	0.625309	0.132367	0.368411	0.29261	6.31024	4.54677	1.8955	2.06928	2.76747	2.48967
LOC_Os08g06440	secretory carrier-associated membrane protein 5, putative, expressed	1.92508	0.0345549	5.47507	3.41356	6.28007	5.07409	20.6102	20.0667	9.61349	11.5773	13.1965	7.23073
LOC_Os12g32940	transporter family protein, putative, expressed	0.467688	2.29074	3.25531	1.54314	1.00982	0.289717	1.0539	0.690246	1.95019	1.04687	1.19529	0.673458
LOC_Os03g01170	transporter family protein, putative, expressed	3.61425	4.58107	3.27359	4.27709	3.08354	2.46712	3.10147	1.76807	2.32201	2.64996	2.75078	3.98102
LOC_Os11g05010	heavy-metal-associated domain-containing protein, putative, expressed	12.5585	23.1315	11.4056	12.7885	11.8178	10.3386	6.77255	5.16145	11.7791	9.64446	9.80576	11.3396
LOC_Os03g64340	heavy metal-associated domain containing protein, expressed	4.88401	11.3529	6.90924	3.7857	4.53317	3.3208	4.38596	1.26328	2.04863	1.65119	2.76133	2.69167
LOC_Os02g32814	heavy metal-associated domain containing protein, expressed	101.779	127.798	83.1938	80.2534	69.0543	82.3273	35.7447	14.3455	38.4723	46.1201	46.2739	62.3072
LOC_Os01g37980	vesicle transport v-SNARE protein, putative, expressed	34.8337	31.6641	38.4345	36.7057	41.564	40.8338	45.446	55.1881	43.881	54.7938	46.6201	38.1211
LOC_Os03g43720	transporter family protein, putative, expressed	14.8232	13.1214	3.60941	5.01311	5.78394	17.0529	15.1899	5.08129	4.09234	3.74143	9.77489	21.8056
LOC_Os05g51610	sodium/calcium exchanger protein, putative, expressed	0.328291	0.676134	0.269703	0.30487	0.239501	0.217733	0.0518775	0.0684047	0.113043	0.105899	0.0455074	0.171661
LOC_Os12g32760	transporter family protein, putative, expressed	0.551091	0.400791	1.34348	0.468754	0.568316	0.471661	3.10283	1.26657	2.40859	2.29233	3.94982	4.34214
LOC_Os01g07870	ABC transporter family protein, putative, expressed	5.83574	6.67195	7.77062	6.80832	7.02135	7.20345	10.2172	12.0169	8.26813	8.42164	7.14522	6.81474
LOC_Os03g59660	clathrin adaptor complex small chain domain containing protein, expressed	15.1251	2.94307	20.6916	10.6642	18.8648	19.9642	57.8411	57.8047	31.1242	44.4766	45.6028	23.1177

## Sheet: DGE_carbohydrate
Gene		SD8	SD12	SD16	SD20	SD24	SD4	LD8	LD12	LD16	LD20	LD24	LD4
LOC_Os01g34920	beta-galactosidase precursor, putative, expressed	244.29	247.488	162.177	134.235	169.506	213.899	65.489	75.3414	63.3338	78.1145	44.2298	63.0807
LOC_Os06g35300	polygalacturonase, putative, expressed	0.0202795	0	0.0707343	0.0255743	0	0.038976	5.67459	3.16026	2.29562	1.38579	1.81558	1.18949
LOC_Os02g38920	OsGAPDH1	662.596	327.045	724.51	416.682	562.036	669.811	864.071	942.891	649.926	822.93	694.212	624.069
LOC_Os06g35370	polygalacturonase, putative, expressed	0.0171637	0	3.27676	0.0781241	0.135142	1.91953	167.358	101.921	40.6638	35.9585	84.4251	39.4728
LOC_Os01g34890	GLUCAN SYNTHASE-LIKE protein, putative, expressed	1.30999	1.37081	1.20461	2.34418	2.535	3.01694	1.07686	1.03445	2.00217	1.76813	1.16882	1.33087
LOC_Os04g44840	glycosyl hydrolase family 3 protein, putative, expressed	9.12161	12.0324	8.75376	12.2159	11.1716	9.40395	8.20645	4.42636	11.061	9.77185	9.66713	10.8518
LOC_Os06g35320	polygalacturonase, putative, expressed	0.0173506	0	6.10246	0.229535	0.682663	2.42246	220.838	101.146	45.5826	32.4437	83.503	54.035
LOC_Os06g08810	NAD dependent epimerase/dehydratase family protein, putative, expressed	0.0346347	0.0170907	0.131782	0.0161883	0.0303639	0.271387	22.6276	15.2526	6.85169	5.92129	10.2831	5.92695
LOC_Os04g51510	glycosyl hydrolases family 16, putative, expressed	0.639742	0.162112	1.0449	0.279733	0.872013	0.679936	1.4497	1.32447	0.669011	0.936377	1.97461	0.880792
LOC_Os03g52630	OsGH9A3	251.815	318.884	160.233	238.406	243.418	233.783	89.5031	95.8289	152.906	143.755	127.752	192.164
LOC_Os07g48750	OsARAF1	2.58488	3.93331	2.42566	2.71329	2.71313	2.52895	2.08368	1.51716	2.68526	2.38466	2.18586	2.16111
LOC_Os03g13570	glycosyl hydrolases family 16, putative, expressed	5.11016	6.20052	3.98406	7.56723	7.07236	3.8572	0.659975	0.184886	2.37837	2.58686	2.02051	3.71466
LOC_Os01g71670	OsGLN2	8.91228	24.9979	20.2162	11.6402	10.3069	7.94484	55.4567	32.1712	30.3655	36.9274	71.4762	62.2028
LOC_Os01g64170	glycosyl hydrolases family 17, putative, expressed	7.08369	14.6406	9.30607	6.71587	7.22379	4.80917	3.16692	4.78942	6.77019	5.4609	5.54844	5.59268
LOC_Os01g71380	glycosyl hydrolases family 17, putative, expressed	0.175412	0.24793	0.313082	0.135508	0.263532	0.0978767	0.620244	0.650173	0.678512	0.605635	1.13886	1.03264
LOC_Os01g71340	glycosyl hydrolases family 17, putative, expressed	2.55356	3.35545	2.27934	1.65068	1.14467	0.938839	13.6716	4.10336	3.48389	4.29268	10.5405	13.4792
LOC_Os01g71350	glycosyl hydrolases family 17, putative, expressed	0.545013	1.77308	0.414522	0.40912	0.83815	0.412787	1.73872	0.531847	0.298971	0.777824	1.11221	1.17177
LOC_Os11g19210	beta-D-xylosidase, putative, expressed	9.5837	2.23315	8.26365	5.76513	6.71492	6.11731	4.3937	3.5534	4.13821	2.38137	2.88654	5.03376
LOC_Os04g38600	glyceraldehyde-3-phosphate dehydrogenase, putative, expressed	68.0186	93.0076	37.7273	31.0468	27.668	24.1293	69.9211	22.2283	42.8409	27.1465	39.3544	67.0773
LOC_Os04g38540	aldose 1-epimerase, putative, expressed	16.1776	1.2901	31.9751	12.9303	18.4474	10.6685	30.0057	32.9065	17.1356	25.585	24.0744	15.8525
LOC_Os04g38530	aldose 1-epimerase, putative, expressed	2.03517	2.05554	3.42982	2.82132	2.82955	2.19113	1.70698	1.52779	4.30561	3.74001	4.73571	5.03539
LOC_Os01g71474	OsEGL2	18.1288	21.4302	10.48	10.8044	14.9303	11.774	5.61256	3.63832	5.72396	7.2811	4.14356	10.2021
LOC_Os11g07020	fructose-bisphospate aldolase isozyme, putative, expressed	170.716	242.758	158.246	132.273	138.099	111.493	135.144	68.5549	106.252	90.8278	132.167	138.283
LOC_Os01g71930	Osg1	2.30542	4.4251	2.37075	2.28361	2.37835	2.17631	2.20998	1.14881	2.54397	2.09442	1.92121	2.64093
LOC_Os10g11140	OspPGM	14.2052	7.74333	18.4	12.6474	16.3432	19.0633	25.1462	35.9924	27.1725	30.8357	22.5648	15.7014
LOC_Os12g41956	galactosyltransferase family protein, putative, expressed	8.06613	11.1054	6.65568	8.339	7.7849	7.49111	4.45466	3.60785	5.62792	4.98025	6.80968	7.24599
LOC_Os06g28194	expressed protein	0	0.0669712	0.34049	0.102017	0.082047	0.00835562	0.340802	0.228202	0.350178	0.176309	0.267615	0.228245
LOC_Os01g64660	MOC2|FBP1	165.594	54.5162	148.804	201.829	173.744	207.456	151.724	110.422	134.585	116.457	162.979	168.611
LOC_Os12g41780	glycosyl transferase family 17 protein, putative, expressed	4.48461	3.52586	5.69649	5.02204	5.29608	5.38813	40.505	21.5889	14.8342	14.4662	22.1923	15.1834
LOC_Os10g28050	chitinase 2, putative, expressed	16.8132	29.6091	26.1598	19.9473	18.8221	16.8131	35.8137	23.0776	28.2646	27.4926	40.2052	33.5443
LOC_Os10g28080	glycosyl hydrolase, putative, expressed	0.259605	2.59129	0.424802	0.201448	0.274787	0.196079	0.783994	0.585948	0.212941	0.513745	1.60994	1.03982
LOC_Os10g28120	glycosyl hydrolase, putative, expressed	37.4708	49.5735	53.0753	34.2337	38.3654	24.5815	50.9814	29.0062	35.7174	52.195	82.6658	88.8877
LOC_Os01g71810	glycosyl hydrolases family 17, putative, expressed	19.1155	0.582918	22.8947	17.1321	8.78232	12.738	3.32116	2.11543	0.884942	0.496687	0.720267	2.47118
LOC_Os01g71820	glycosyl hydrolases family 17, putative, expressed	1.85522	0.363601	2.58955	2.52132	0.965225	1.07622	0.588984	0.167315	0.616648	1.02148	3.22316	1.30987
LOC_Os01g64750	sterol 3-beta-glucosyltransferase, putative, expressed	5.87067	3.63965	5.12821	7.04627	8.13752	10.3677	6.06152	11.9498	7.71136	9.21763	6.05622	5.58203
LOC_Os02g15690	polygalacturonase, putative, expressed	1.26087	1.68721	1.378	1.62086	1.75809	1.69523	0.445745	0.579876	1.28381	0.987463	0.889727	0.786346
LOC_Os02g38140	glycosyl transferase family 17 protein, putative, expressed	8.74293	11.795	8.99183	12.3456	10.6358	11.0865	13.6199	20.7479	17.4808	14.3591	15.688	14.7318
LOC_Os08g14330	aldose 1-epimerase, putative, expressed	32.7724	22.6215	32.226	33.9577	39.4953	43.7057	76.9227	88.9748	58.1919	66.2015	53.645	46.2767
LOC_Os06g28670	polygalacturonase, putative, expressed	0	0.0494046	0.0447456	0.0439603	0.0455574	0.0540834	0.0157854	0	0.0443147	0.160342	0.140053	0.489945
LOC_Os09g25490	Bc6|OsCesA9	127.541	175.207	124.087	120.77	105.225	91.3319	45.2991	59.8509	94.7066	69.9777	66.8544	94.405
LOC_Os05g31140	OsEGL1	6.65336	22.4913	8.69292	5.54361	6.06704	7.40709	11.2316	3.41064	5.05155	6.64352	8.47912	13.4721
LOC_Os01g53000	OsTPS3	20.9244	16.5822	25.2801	23.2118	25.4256	25.8809	37.673	40.3852	29.9728	32.0038	26.8543	22.5899
LOC_Os05g31110	OsHXK10	4.52906	1.41371	4.66874	3.6149	4.8147	4.94415	6.55971	8.05745	3.79929	5.92829	4.84649	3.48069
LOC_Os07g36630	CSLF8 - cellulose synthase-like family F; beta1,3;1,4 glucan synthase, expressed	5.11816	3.79135	6.26802	5.54572	6.73404	7.48803	7.13041	8.14829	6.89897	8.33146	5.78907	3.68434
LOC_Os07g36690	CSLF2 - cellulose synthase-like family F; beta1,3;1,4 glucan synthase, expressed	0.952939	1.46697	3.67119	3.57701	2.60344	0.5362	5.41219	10.4178	9.39538	5.82226	3.48857	1.82177
LOC_Os03g58900	galactosyltransferase family protein, putative, expressed	3.11282	7.26093	4.04283	5.78367	4.94507	5.87808	7.41993	14.8927	6.87358	7.11721	7.90396	6.60096
LOC_Os03g21210	OsGLU1|OsGH9A1	23.0851	38.5612	28.6047	24.9386	22.7795	22.3636	31.3549	27.6477	34.5103	27.3462	40.1266	40.4832
LOC_Os03g58920	galactosyltransferase family protein, putative, expressed	5.92855	4.66823	5.82031	6.02217	5.99904	6.79756	9.81704	8.62684	6.83772	8.35712	6.93498	6.56575
LOC_Os07g36610	CSLF9 - cellulose synthase-like family F; beta1,3;1,4 glucan synthase, expressed	3.2631	0.56969	3.75571	3.8198	3.61008	2.68811	1.84154	2.31361	4.08542	3.52711	3.53642	4.04129
LOC_Os07g36700	CSLF1 - cellulose synthase-like family F; beta1,3;1,4 glucan synthase, expressed	0.321758	0.542138	1.47404	1.36644	0.826201	0.147699	1.21549	3.37238	3.24859	2.13012	0.960562	0.457532
LOC_Os09g20990	trehalose-6-phosphate synthase, putative, expressed	14.3868	18.6139	10.5945	22.1208	19.1022	17.9928	10.1331	6.10177	13.8554	14.1231	13.7889	12.6192
LOC_Os06g04200	Wx	6.26409	0.364779	22.9481	9.96218	13.3994	11.7201	73.8561	73.9865	32.5108	33.0616	38.9485	26.909
LOC_Os07g44660	FGGY family of carbohydrate kinases, putative, expressed	78.5395	90.7768	56.6589	66.1159	71.5931	78.4203	28.8977	32.2012	45.9682	51.0949	33.2607	36.754
LOC_Os07g09690	galactosyltransferase family protein, putative, expressed	4.9768	6.22321	6.40295	5.19929	5.95974	6.27914	9.92501	8.45261	5.95425	7.41782	7.55214	6.71762
LOC_Os07g01200	tetraacyldisaccharide 4-kinase, putative, expressed	4.62865	4.45913	6.06482	3.72496	5.62004	4.64576	10.0873	10.4419	7.37168	8.85359	7.09284	5.22714
LOC_Os10g35070	alpha-galactosidase precursor, putative, expressed	3.03292	7.5264	2.64412	2.30171	2.56535	2.11829	6.00167	27.708	2.82422	1.66027	2.77304	6.66102
LOC_Os10g35110	alpha-galactosidase precursor, putative, expressed	101.981	158.865	113.879	96.9227	86.1739	82.3166	70.9059	43.5216	118.431	92.8136	132.897	136.901
LOC_Os06g04080	glycosyl hydrolases family 17, putative, expressed	2.09844	0.790753	3.92723	4.71178	3.55284	2.34182	6.95761	3.60455	8.30886	7.15234	10.034	9.68099
LOC_Os11g10980	pyruvate kinase, putative, expressed	53.1013	20.695	48.4531	41.5403	55.5088	75.9166	78.2997	84.5443	47.8153	70.0221	51.5684	37.7871
LOC_Os11g27400	glycosyl hydrolase, putative, expressed	5.48515	11.9404	4.33648	4.81745	7.02574	5.45636	0.24986	0.317358	1.28074	1.04969	0.52516	1.82241
LOC_Os10g39840	glycosyl hydrolases family 16, putative, expressed	43.1428	62.0963	42.3597	27.4069	20.6216	18.6505	11.7755	4.9199	17.3162	13.9719	16.9058	27.598
LOC_Os10g39680	CHIT14 - Chitinase family protein precursor, expressed	1.18129	1.29959	1.68188	3.02796	1.61628	1.62788	4.86394	4.08647	3.18338	4.96252	8.054	6.96884
LOC_Os09g20390	OsTPP7	1.39347	3.28189	0.79712	0.5654	0.787526	0.652406	1.09244	29.5922	0.81426	0.693074	0.63636	1.03433
LOC_Os09g31430	Os9bglu30 - beta-glucosidase, similar to Os4bglu12 exoglucanase, expressed	3.5824	5.06485	3.76552	6.35334	6.01142	4.56271	2.81096	2.20723	7.91419	8.43076	10.6015	8.90765
LOC_Os06g12450	ALK|SSIIa	23.3836	3.73837	25.7795	22.9707	23.2456	20.8595	20.098	23.1222	25.5065	22.2001	20.1699	23.6717
LOC_Os05g50960	polygalacturonase, putative, expressed	18.64	22.5512	11.3402	15.2529	15.9966	18.618	3.55616	4.06984	7.32539	7.69315	9.12692	14.5914
LOC_Os08g02220	endoglucanase, putative, expressed	0.408143	1.55887	0.670168	0.590745	0.831285	0.428529	0.71082	0.319041	0.472389	0.43562	0.850033	0.339625
LOC_Os02g06840	galactosyltransferase, putative, expressed	24.5892	33.3566	20.94	25.3272	22.1113	22.3371	17.3054	12.861	24.8435	21.7029	19.3892	22.7399
LOC_Os08g02370	galactosyltransferase family protein, putative, expressed	24.7126	38.1634	21.6512	24.4396	25.9232	24.0545	12.4545	8.24541	13.9977	13.2365	16.5704	17.1656
LOC_Os06g51060	RC24	3.41692	60.5903	4.75085	3.82652	4.04164	3.66392	6.73469	3.71853	5.08851	9.6437	12.7504	11.9695
LOC_Os06g51050	Cht-3	0.427925	8.45131	1.09351	0.510515	0.282993	0.269341	1.73858	1.07007	1.2392	1.92187	3.76398	3.06421
LOC_Os02g10070	citrate synthase, putative, expressed	65.597	54.1906	84.7126	55.5173	69.1386	74.9309	171.28	172	107.056	118.215	122.017	91.2808
LOC_Os01g52450	hexokinase, putative, expressed	1.64832	2.56848	0.933512	1.44876	1.28649	1.4634	0.684084	0.914397	0.958134	0.881518	0.708452	0.690156
LOC_Os10g41550	beta-amylase, putative, expressed	26.7297	21.5433	10.5529	22.4902	29.1579	44.3065	11.2195	3.92288	5.61478	11.6049	21.5866	39.8849
LOC_Os08g03670	galactosyltransferase family protein, putative, expressed	8.05587	6.64326	8.6476	7.75781	9.3546	9.58273	22.101	18.5326	12.9691	14.0336	15.3715	11.2452
LOC_Os03g30300	6-phosphogluconolactonase, putative, expressed	2.64981	3.40047	0.98904	2.48542	2.84379	3.65758	4.15181	6.77919	2.26995	1.56598	0.927737	1.56406
LOC_Os06g51270	1,3-beta-glucan synthase component domain containing protein, expressed	51.3964	69.897	36.2619	59.5357	53.0159	64.1957	45.5555	26.7337	43.7344	51.3957	53.6323	67.3603
LOC_Os08g02700	fructose-bisphospate aldolase isozyme, putative, expressed	1.40114	3.08943	1.78199	1.95045	1.50004	1.22217	1.53316	2.18946	1.71341	3.49222	3.18254	5.32756
LOC_Os02g10300	polygalacturonase, putative, expressed	1.14934	0.47156	25.4095	3.63914	9.21743	13.2945	343.404	334.03	121.874	116.462	170.371	113.851
LOC_Os03g14010	glycosyl hydrolase family 10 protein, putative, expressed	8.38015	14.295	4.49133	4.25354	6.8649	6.48084	5.09417	2.7109	5.33736	4.76312	9.58244	12.1068
LOC_Os09g32080	bc15|OsCTL1	207.982	202.994	133.557	166.511	180.917	173.007	60.6205	68.5054	90.37	75.1749	76.3062	92.9072
LOC_Os04g33460	1,4-alpha-glucan-branching enzyme 2, chloroplast precursor, putative, expressed	16.5191	24.7209	32.2742	28.3267	31.9527	33.8678	29.6617	46.2117	52.4818	40.9039	28.6532	21.4252
LOC_Os01g69210	OsMOGS	17.405	12.1913	15.2246	21.8975	21.5881	23.7391	19.1824	20.7048	18.9555	22.0939	16.2937	15.2148
LOC_Os03g46910	pyruvate kinase, putative, expressed	25.9366	8.41743	25.5882	20.5616	30.4623	31.8931	24.2028	28.9093	15.8575	23.1512	16.5834	13.0253
LOC_Os05g50260	polygalacturonase, putative, expressed	2.46199	2.7258	0.284159	0.446659	0.623153	1.90957	0.350745	0.101879	0.305414	0.257093	0.255215	0.569612
LOC_Os04g45290	OsINV2	2.98333	4.51035	13.5682	4.03789	6.19432	9.38367	111.112	135.943	44.2939	40.5867	60.7668	61.1281
LOC_Os04g33640	glycosyl hydrolases family 17, putative, expressed	4.58356	5.99291	9.01836	6.46348	7.3623	5.67378	16.6176	27.6231	14.0803	10.1066	19.2181	16.4134
LOC_Os01g69030	sps1|SPS|OsSPS1	104.141	74.3194	145.539	110.316	121.25	122.356	308.402	323.408	189.054	177.67	189.95	184.013
LOC_Os03g46660	glucan endo-1,3-beta-glucosidase precursor, putative, expressed	38.8374	64.0448	40.8667	45.8341	42.0117	30.9264	23.8339	14.5296	24.3267	22.5376	33.6837	40.184
LOC_Os06g22980	CSLD5 - cellulose synthase-like family D, expressed	0	0.00728534	0	0	0.0193976	0.0157752	6.65701	3.89415	1.73541	0.731633	2.37682	1.55154
LOC_Os09g36350	endoglucanase, putative, expressed	274.192	329.135	208.234	267.798	252.482	248.406	106.05	84.4121	160.039	165.397	160.917	200.144
LOC_Os08g33720	lactate/malate dehydrogenase, putative, expressed	59.0582	37.6139	53.0239	51.9429	57.3151	70.1989	62.9557	79.0939	62.1218	70.4703	54.4507	48.0514
LOC_Os04g33740	GIF1|OsCIN2|OsGIF1|WB1	66.9279	96.6353	49.1796	36.6335	41.6332	34.1988	88.8951	35.4196	47.5167	34.9325	39.4114	55.2944
LOC_Os06g39060	glucan endo-1,3-beta-glucosidase precursor, putative, expressed	1.10543	0	8.12131	2.38932	4.48603	6.0761	113.791	86.5504	36.5825	43.2419	62.7102	35.6838
LOC_Os03g04770	beta-amylase, putative, expressed	40.4655	4.01898	146.969	50.1749	100.043	66.1879	843.795	691.461	348.736	473.896	557.878	361.268
LOC_Os09g36280	glycosyl hydrolases family 17, putative, expressed	0.45588	0.637639	0.436981	0.860273	0.767614	0.496707	3.62503	2.03062	2.31583	1.98322	2.24116	2.26971
LOC_Os04g33720	OSINV4	171.795	3.92852	330.591	159.053	219.748	182.668	319.547	540.12	257.516	352.028	247.921	176.732
LOC_Os06g48180	glycosyl hydrolases family 16, putative, expressed	44.7544	113.367	81.5775	123.537	75.1819	57.773	20.1048	13.2053	52.3264	62.1924	71.4038	95.5007
LOC_Os04g55410	FGGY family of carbohydrate kinases, putative, expressed	122.226	106.163	114.456	98.2881	110.856	115.993	50.2942	53.7222	65.0206	65.7837	57.5	64.8999
LOC_Os06g48170	glycosyl hydrolases family 16, putative, expressed	9.51007	18.0864	13.7393	6.41409	9.80563	8.22824	21.7913	20.4233	9.56319	11.6135	17.4086	12.31
LOC_Os06g48160	glycosyl hydrolases family 16, putative, expressed	25.4855	19.8646	6.67026	18.386	7.35377	7.43378	2.95528	45.853	6.89022	4.47261	4.16932	9.42616
LOC_Os01g71280	glycerol-3-phosphate dehydrogenase, putative, expressed	58.4436	73.2597	50.0571	57.9423	48.2196	51.6628	15.2288	16.534	39.6502	33.6407	30.814	42.0136
LOC_Os11g43750	polygalacturonase, putative, expressed	11.1966	8.37861	8.61509	11.3566	9.69719	12.1607	4.79297	4.24941	6.88539	8.77616	8.76689	9.59289
LOC_Os06g48200	glycosyl hydrolases family 16, putative, expressed	359.757	444.893	291.772	459.381	302.979	263.032	112.604	177.692	271.983	203.557	148.663	184.597
LOC_Os09g36810	beta-galactosidase precursor, putative, expressed	21.4491	3.69211	58.0738	27.7835	42.0744	36.2407	253.384	302.376	147.542	152.241	151.033	101.338
LOC_Os09g29404	ISA3	16.5012	12.0548	18.6633	15.9089	17.447	22.9715	94.7765	88.431	46.3429	48.8141	50.5836	40.8403
LOC_Os02g52700	alpha-amylase precursor, putative, expressed	5.68323	0.619791	23.0193	17.3147	14.7094	13.7086	53.7735	29.6706	88.9785	58.8885	114.805	109.658
LOC_Os03g09250	OsINO1-1|OsINO1	157.509	158.412	76.9095	61.7843	85.8175	107.987	45.998	64.5309	37.6537	39.5627	42.5447	101.132
LOC_Os02g52800	OsMan03 - Endo-Beta-Mannanase, expressed	0.590177	1.08559	0.429699	0.21584	0.447065	0.160165	0.0201831	0	0	0	0.111161	0
LOC_Os03g38050	galactosyltransferase, putative, expressed	14.3891	18.7992	13.0115	15.0346	15.5053	14.0745	9.32469	6.01396	15.2935	13.5575	11.9755	13.3664
LOC_Os07g47120	beta-amylase, putative, expressed	0	0	0	0.00819525	0	0	4.67581	2.41765	0.9826	0.367417	2.02198	1.15505
LOC_Os03g53800	periplasmic beta-glucosidase precursor, putative, expressed	96.5078	172.294	79.8537	146.679	118.911	93.831	26.0401	34.3273	65.8117	56.2026	54.5154	82.8049
LOC_Os10g02770	glycosyl hydrolases family 16, putative, expressed	9.51443	11.2079	7.72074	10.9452	11.354	13.2063	2.6502	1.6862	5.23721	5.45892	4.89156	5.12416
LOC_Os03g53860	periplasmic beta-glucosidase precursor, putative, expressed	33.8962	44.8658	28.7363	23.6132	25.4168	27.451	24.3231	16.869	31.6938	22.7644	25.231	45.3975
LOC_Os07g35520	glucan endo-1,3-beta-glucosidase precursor, putative, expressed	0.46495	0.761965	0.2512	0.244146	0.457415	0.134052	0.0676282	0.0137216	0.189161	0.0867015	0.1145	0.140839
LOC_Os12g03530	alpha-N-arabinofuranosidase, putative, expressed	3.72214	4.50168	4.3853	6.50284	4.86971	5.88687	7.45301	4.66633	6.35052	4.93293	6.58058	7.23842
LOC_Os07g35510	glucan endo-1,3-beta-glucosidase precursor, putative, expressed	0.413521	1.597	1.20529	1.98473	0.941504	1.62437	1.12046	0.739092	1.70549	2.26512	2.80839	2.52281
LOC_Os03g53790	periplasmic beta-glucosidase precursor, putative, expressed	257.705	101.782	351.129	171.808	237.123	196.577	291.338	378.569	231.917	285.715	193.35	164.169
LOC_Os05g35266	galactosyltransferase, putative, expressed	149.464	43.6336	214.598	218.955	190.315	151.367	273.581	212.212	289.057	225.551	250.579	297.108
LOC_Os03g04060	chi11	2.68927	12.7304	3.40396	2.33326	2.77647	2.74751	3.44882	2.04623	2.22664	3.05109	5.08083	4.93859
LOC_Os04g43410	Os4bglu18 - monolignol beta-glucoside homologue, expressed	8.88267	13.8476	7.47456	9.1814	7.49474	6.17108	3.60662	2.43143	8.92778	7.10184	8.1686	10.3067
LOC_Os03g53710	aldose 1-epimerase, putative, expressed	0.465646	2.8337	6.31844	2.76852	1.83737	0.461386	0.434748	0.346928	3.05356	2.48779	2.63218	0.564954
LOC_Os12g03470	alpha-N-arabinofuranosidase A, putative, expressed	34.2935	44.8749	41.3985	82.6741	55.0287	48.4505	22.273	15.8158	46.3941	48.3138	48.8188	57.6733
LOC_Os06g05860	6-phosphofructokinase, putative, expressed	71.1889	46.4139	55.8153	59.7319	69.1237	84.6804	118.259	143.069	85.2292	97.9889	87.0846	83.2833
LOC_Os05g23600	dolichyl-diphosphooligosaccharide--protein glycosyltransferase 67 kDasubunit precursor, putative, expressed	87.2806	58.5491	69.8145	86.8461	96.5229	115.466	86.3861	101.991	75.6646	94.7668	67.5798	64.6627
LOC_Os04g43390	Os4bglu16 - monolignol beta-glucoside homologue, expressed	1.7642	2.77816	0.522943	1.47183	1.07133	1.36703	0.837518	0.500199	0.984152	0.769788	0.687085	1.57311
LOC_Os03g40670	glycerophosphoryl diester phosphodiesterase family protein, putative, expressed	4.87947	8.35159	4.10034	10.2318	9.2079	7.4546	1.96077	3.03165	5.48447	7.44687	6.03769	6.23565
LOC_Os12g03790	rhamnogalacturonate lyase, putative, expressed	0.419574	0.245996	1.0068	0.120302	0.461334	0.91775	0.0239034	0.156254	0.0874299	0.0988115	0.0358902	0.0563395
LOC_Os06g34020	glycosyl hydrolases family 17, putative, expressed	0.11268	0.52674	0.157991	0.178666	0.0860771	0.23902	0.0909626	0.0341567	0.049059	0.11755	0.0584389	0.15689
LOC_Os02g26814	UDP-N-acetylglucosamine transferase subunit ALG13, putative, expressed	24.8088	15.2104	19.3801	33.9641	33.479	49.8767	35.9191	38.0875	29.9641	37.6087	29.1895	26.6341
LOC_Os03g10440	glycosyl hydrolase family 10 protein, putative, expressed	0.951997	0.485532	1.6129	1.43183	1.59654	1.16762	4.8827	3.03883	3.47877	2.57791	4.73463	4.46978
LOC_Os03g10469	glycosyl hydrolase family 10 protein, putative, expressed	2.62116	0.00840896	16.7969	5.70953	11.8218	13.7095	138.639	169.138	67.6564	79.3368	81.0506	55.3393
LOC_Os03g10478	glycosyl hydrolase family 10 protein, putative, expressed	12.5452	17.5198	13.0388	9.29315	10.7528	8.41155	10.2679	5.01461	11.5648	9.35675	15.1233	28.3492
LOC_Os07g35880	beta-amylase, putative, expressed	113.367	43.2762	140.148	117.019	99.7133	103.36	81.2487	73.4865	103.566	82.4269	80.6666	119.195
LOC_Os03g61270	OsMan04 - Endo-Beta-Mannanase, expressed	0.371402	1.25442	0.646209	0.543414	0.340901	0.229628	0.290302	0.214299	0.597235	0.280383	0.247664	0.123522
LOC_Os05g23924	glycosyl hydrolase family 10 protein, putative, expressed	2.10504	2.16731	2.46685	2.82264	2.4594	2.28983	0.316484	0.33733	0.623251	0.638224	0.417777	1.02119
LOC_Os07g35940	beta-amylase, putative, expressed	912.262	1847.16	854.189	836.023	696.84	760.834	72.9922	77.2078	489.002	332.454	283.255	603.061
LOC_Os01g63270	Pho2	82.282	14.7165	185.964	112.293	157.472	173.217	767.812	863.049	418.563	490.742	437.311	292.756
LOC_Os03g14210	glycosyl hydrolases family 17, putative, expressed	15.2471	20.4257	16.8853	12.434	11.8809	7.54845	7.15544	6.03151	18.2697	11.085	12.1857	15.7018
LOC_Os08g09230	OsSSIIIa|Flo5	9.99915	9.1069	9.05178	12.7686	12.3303	16.2148	16.1789	15.9329	14.7382	14.4607	10.4342	10.8024
LOC_Os11g18730	glycosyl hydrolase family 3 protein, putative, expressed	43.9212	113.784	53.6813	67.4437	54.8357	34.7626	5.19314	6.05161	33.6661	25.8012	18.4247	39.8655
LOC_Os09g09980	glucan endo-1,3-beta-glucosidase precursor, putative, expressed	14.2325	14.3214	8.64132	14.7289	15.0355	15.3965	5.86626	7.28314	10.3976	8.22796	6.61004	9.43159
LOC_Os06g22919	DEFL9 - Defensin and Defensin-like DEFL family, expressed	0.559775	1.80525	0.437396	0.785057	0.510998	0.37406	0.573077	0.316868	0.306453	0.460304	0.501125	0.476343
LOC_Os02g47020	OsPrk	36.0746	44.4194	16.7058	20.7412	23.8118	25.5255	19.1068	9.91277	18.4408	17.1731	20.1391	29.149
LOC_Os03g57880	glucan endo-1,3-beta-glucosidase precursor, putative, expressed	27.3124	16.7829	44.8558	26.6001	25.2663	22.1247	28.4414	34.0551	22.0214	27.1699	34.9532	30.4532
LOC_Os03g61800	polygalacturonase, putative, expressed	9.87924	12.1987	6.74623	10.7938	10.5647	11.0812	4.75732	3.61238	6.69634	6.80178	6.88742	7.46191
LOC_Os07g43820	glycosyl hydrolase, putative, expressed	119.934	131.886	73.9494	73.0579	74.4545	88.1468	204.717	79.6669	74.696	96.583	183.569	274.71
LOC_Os10g22520	GH5BG	0.549431	2.34031	2.76943	3.1665	2.15882	1.31631	1.78192	0.803243	1.39965	1.91664	2.95962	2.18064
LOC_Os02g55470	alpha-1,6-mannosyl-glycoprotein 2-beta-N-acetylglucosaminyltransferase, putative, expressed	7.07029	9.70004	7.03878	6.0971	7.39006	8.24231	6.47982	3.57555	4.81417	5.46397	8.35585	9.23498
LOC_Os01g63810	starch binding domain containing protein, putative, expressed	24.6904	6.68908	30.4146	26.996	33.1853	37.7922	50.5589	49.8031	41.6386	49.5971	64.5533	52.6578
LOC_Os01g12070	OsCel9A|OsGLU5	0.51991	1.34329	1.1383	0.55671	0.786841	0.540892	2.03671	1.21822	2.34623	1.68135	1.42916	0.946853
LOC_Os05g46520	polygalacturonase, putative, expressed	12.7134	29.8116	26.1531	25.8832	19.589	14.233	8.40466	6.91979	22.0262	17.3743	15.9353	17.1374
LOC_Os01g63970	sialyltransferase family domain containing protein, expressed	1.08824	1.91539	1.59958	0.927477	0.904391	0.771843	2.32482	1.46819	1.7268	1.327	2.66398	1.89427
LOC_Os08g01600	polygalacturonase, putative, expressed	3.27347	2.6333	4.55268	4.08733	4.69615	3.55974	8.37351	6.31064	5.77318	5.91521	6.81068	5.85442
LOC_Os02g10660	glycosyl hydrolases family 17, putative, expressed	1.90971	3.64529	4.20838	3.30978	2.8004	1.55838	2.59963	1.10182	2.87217	2.38182	3.48595	2.50632
LOC_Os03g26430	aldose 1-epimerase, putative, expressed	212.847	80.9228	355.468	114.473	162.781	113.536	212.228	203.067	116.491	160.407	180.276	138.717
LOC_Os07g43700	lactate/malate dehydrogenase, putative, expressed	0.472472	1.39951	0.307236	0.0895043	0.180199	0.14017	0.452736	0.225692	0.265683	0.119557	0.0490279	0.352799
LOC_Os06g13040	glycosyl hydrolases family 16, putative, expressed	28.8834	11.9273	40.6929	30.2598	29.8702	20.9064	43.0479	21.4616	41.0714	27.4248	56.3254	41.1649
LOC_Os02g39330	CHIT1 - Chitinase family protein precursor, expressed	0.0250781	4.56157	0.231613	0.211481	0.153959	0.156742	0.562924	0.349157	0	0.324585	0.492462	0.532475
LOC_Os10g22450	OsINO1-2	54.4074	5.35386	115.909	50.3387	81.0474	66.8643	358.457	375.273	166.367	208.248	244.104	144.096
LOC_Os07g43390	DPE1	5.77972	7.47485	6.44394	8.19582	8.4895	10.3016	32.1842	32.1369	17.7698	18.412	18.0673	13.4531
LOC_Os05g30250	Os5bglu19 - beta-glucosidase homologue, similar to G. max isohydroxyurate hydrolase, expressed	7.83966	8.31624	2.25394	2.30824	2.05117	4.76708	10.8638	2.82423	5.12275	4.04061	6.44228	14.3049
LOC_Os08g29770	endoglucanase, putative, expressed	214.641	1195.78	155.928	138.569	114.572	149.734	101.744	39.8662	62.3982	57.231	76.6928	188.666
LOC_Os02g26720	Inositol 1, 3, 4-trisphosphate 5/6-kinase, putative, expressed	3.55074	0.702063	3.60501	5.08855	4.73396	3.52815	6.58229	2.60822	2.26523	2.94222	3.65415	5.49055
LOC_Os10g06720	aldose 1-epimerase, putative, expressed	47.6282	62.6914	47.1137	34.6766	39.5987	37.3508	19.3621	18.8731	23.1591	26.1754	24.686	25.1244
LOC_Os03g16050	fructose-1,6-bisphosphatase, putative, expressed	24.046	27.0075	22.0245	23.5656	17.4533	9.86457	14.9565	6.5116	18.6465	20.1377	26.0568	26.573
LOC_Os05g30350	Os5bglu22 - beta-glucosidase homologue, similar to G. max isohydroxyurate hydrolase, expressed	3.84832	4.08959	1.56122	2.19267	1.98445	2.70512	3.81936	1.6008	2.40977	2.24854	2.59574	6.59071
LOC_Os02g55910	OsMGD|OsMGD2	6.75832	9.65917	5.95205	7.7299	6.24223	7.03302	16.5565	14.3761	9.79727	8.62861	11.5406	8.93937
LOC_Os08g29710	galactosyltransferase family protein, putative, expressed	17.746	15.1771	13.3456	17.1672	16.8263	17.6383	20.0648	24.9247	14.9575	16.3646	15.0858	16.5263
LOC_Os05g30320	6-phospho-beta-galactosidase, putative, expressed	0	0	0.143907	0	0	0.252198	7.70497	4.0339	1.61887	1.86447	2.90206	1.57728
LOC_Os05g30300	Os5bglu21 - beta-glucosidase homologue, similar to G. max isohydroxyurate hydrolase, expressed	0.412674	0.68526	0.247949	0.315521	0.275921	0.513072	0.0159484	0.063578	0.0284271	0.137662	0.0520631	0.231482
LOC_Os06g22060	pyrophosphate--fructose 6-phosphate 1-phosphotransferase subunit alpha, putative, expressed	59.6365	42.8593	40.8279	47.3747	48.8377	57.9082	26.9139	31.0825	31.9728	34.3116	28.2756	34.4183
LOC_Os06g40890	polygalacturonase, putative, expressed	0	0	0	0	0.0157047	0	42.1498	11.1974	6.83807	3.80716	21.2167	7.5446
LOC_Os05g35360	beta-galactosidase 7 precursor, putative, expressed	1.53658	2.97576	0.52692	0.876933	0.943936	0.645118	0.0489675	0.0354158	0.129867	0.118263	0.132877	0.44459
LOC_Os07g35480	glucan endo-1,3-beta-glucosidase precursor, putative, expressed	1.97495	4.03988	1.28365	1.57618	2.2299	2.14284	0.879223	0.352248	0.775392	0.6022	1.74554	1.60531
LOC_Os03g26910	uncharacterized glycosyl hydrolase Rv2006/MT2062, putative, expressed	5.94285	9.79077	3.22595	2.70638	2.16573	3.4116	6.00065	5.03017	2.50767	3.26428	3.68561	8.35982
LOC_Os02g03120	endoglucanase, putative, expressed	2.34615	0.0445381	5.40073	3.05564	5.72065	3.05263	7.76297	13.4272	8.67319	11.0084	7.92818	4.11629
LOC_Os09g26320	hypro1, putative, expressed	2.63305	5.92856	6.58739	3.59494	2.47875	1.38249	1.64112	2.13976	5.89536	4.44707	3.35242	3.02096
LOC_Os09g26310	hypro1, putative, expressed	8.67983	16.2152	12.8615	11.5277	10.5295	6.81833	14.0575	6.67243	14.9167	14.363	15.9179	19.015
LOC_Os09g26300	hypro1, putative, expressed	6.4162	11.2793	8.44561	7.4432	7.36969	4.03815	4.5676	2.05149	6.61244	6.40141	7.98405	7.6035
LOC_Os08g25710	CSLD3 - cellulose synthase-like family D, expressed	0.0839958	0.120749	0.137523	0.0560852	0.0903671	0.11703	20.9718	14.2759	6.15209	3.29388	7.53349	5.83846
LOC_Os03g15950	OsEno3	19.681	14.6541	22.3596	20.0897	22.6674	22.6017	24.0131	43.2259	24.0933	28.9743	20.4612	19.8051
LOC_Os01g39830	beta-galactosidase, putative, expressed	53.5921	53.0598	46.4024	87.4192	75.4903	78.7914	18.9017	18.9378	69.893	52.5898	48.9516	61.5918
LOC_Os09g30130	CSLE6 - cellulose synthase-like family E, expressed	1.47919	0.823641	2.28561	4.06397	2.90427	3.4984	2.74708	2.46081	6.46946	4.09607	4.35065	4.17559
LOC_Os08g40930	OsISA1|OsPHS8	24.8314	8.43209	25.0218	32.9976	31.6214	37.4342	19.8299	27.6424	29.999	28.2658	26.3825	25.8962
LOC_Os11g44950	glycosyl hydrolase family 3 protein, putative, expressed	1.80711	7.63221	6.22908	4.1339	2.71709	1.44777	4.67061	2.81075	7.31419	5.20664	7.64672	7.12791
LOC_Os01g16960	pyruvate kinase, putative, expressed	159.051	90.3601	182.195	107.89	143.195	146.79	235.908	199.361	131.768	171.433	193.543	147.141
LOC_Os06g40640	OsAld-Y	5.61132	8.08878	5.3036	4.01562	3.86167	2.03059	7.05897	1.63335	5.4001	4.85677	9.42904	9.57081
LOC_Os06g13720	dehydrogenase E1 component domain containing protein, expressed	2.34764	1.89079	1.71413	3.66148	4.19964	4.21921	1.29	0.499256	0.917579	1.64555	2.7356	2.17162
LOC_Os08g25734	OsAPS2|OsAGPS2b	60.3947	49.7497	45.9724	45.6799	50.3246	57.6426	93.3914	84.9082	63.4692	65.6574	73.6974	70.4351
LOC_Os03g22790	beta-amylase, putative, expressed	5.53069	7.97342	5.07977	7.62601	6.90154	4.86127	7.35916	6.57634	5.51098	8.10518	11.4564	16.8833
LOC_Os08g13980	glycosyl hydrolases family 16, putative, expressed	0	0.0590064	0.0729064	0	0	0.0851794	6.15725	3.28278	1.50787	1.29629	3.44126	1.50845
LOC_Os06g13830	endoglucanase, putative, expressed	5.88154	10.9418	6.13651	5.20219	4.17991	2.08427	1.66843	4.30616	5.73662	4.10561	1.11689	2.95598
LOC_Os02g03550	glycosyl hydrolases family 16, putative, expressed	0.703344	0.571047	0.890762	0.278407	0.471104	0.417437	14.1806	6.9404	4.46159	3.34561	7.75203	4.07865
LOC_Os08g40680	OsGH	0.201811	1.65029	0.549819	0.316984	0.388553	0.593474	0.366968	0.175391	0.346578	0.563353	0.695077	0.570347
LOC_Os01g09570	6-phosphofructokinase, putative, expressed	49.7335	29.0442	35.4696	54.1042	52.8263	58.9049	50.0708	60.5909	55.0253	41.7049	49.3071	60.3532
LOC_Os01g51570	glycosyl hydrolases family 17, putative, expressed	0.834481	1.09217	0.324258	0.4061	0.509772	0.0944161	2.35638	1.16429	1.04575	1.41347	2.19669	2.3216
LOC_Os08g13920	OsXTH8	180.832	396.919	136.89	117.618	145.842	112.811	39.5495	47.2213	46.6587	52.3422	51.16	108.949
LOC_Os02g03750	polygalacturonase, putative, expressed	5.22709	5.68432	5.01227	4.04768	4.08068	3.9847	5.05314	2.38851	5.63834	4.36471	5.33377	9.72259
LOC_Os04g54810	beta-D-xylosidase, putative, expressed	42.9821	63.7638	36.5101	34.2714	29.4871	28.1216	16.1191	12.774	24.5306	17.6306	14.9265	27.2041
LOC_Os02g03870	periplasmic beta-glucosidase precursor, putative, expressed	12.4268	1.77401	13.8255	18.9784	17.2192	15.9644	17.6795	8.34904	13.4294	23.6535	31.4121	24.2393
LOC_Os11g38810	mannose-6-phosphate isomerase, putative, expressed	43.1644	14.2291	46.1513	27.0425	36.6119	38.2423	48.6554	63.9136	30.92	39.7058	32.9686	26.1469
LOC_Os07g23880	glycosyl hydrolase, family 31, putative, expressed	50.2846	52.4419	47.0932	58.565	55.847	61.7612	79.8153	87.7624	78.3198	74.8415	62.5178	58.1022
LOC_Os10g40130	Mur ligase family protein, putative, expressed	5.4463	5.99241	4.10056	5.13478	5.09005	4.66336	2.45263	1.45927	5.51071	4.0463	3.4243	3.92512
LOC_Os01g56510	periplasmic beta-glucosidase precursor, putative, expressed	11.0784	12.7388	7.91732	13.1432	11.2995	12.4173	6.09947	5.1691	11.4505	9.86751	8.41816	10.8553
LOC_Os11g33240	citrate synthase, putative, expressed	27.6781	18.1323	34.9298	27.7075	32.9288	37.8609	73.8249	82.3539	44.8643	59.7354	53.9259	38.7999
LOC_Os11g33270	OsXTR1|XTH2	2.00823	3.43516	1.05993	1.30998	1.30315	1.05707	2.37867	1.31279	1.40122	1.39012	2.49068	4.12751
LOC_Os02g51070	SSIIB	7.96505	16.2432	4.93706	2.42561	3.60051	3.7153	4.47244	1.76172	2.24273	1.89398	2.26359	4.65736
LOC_Os08g20660	sucrose-phosphate synthase, putative, expressed	42.5212	55.373	34.3548	51.0051	41.3165	41.3819	23.6359	19.259	44.0799	37.7518	37.0699	43.4369
LOC_Os06g45370	fructose-1,6-bisphosphatase, putative, expressed	8.74284	9.5336	6.29551	9.1166	9.91012	8.36487	3.97649	2.77465	6.92101	7.02097	5.62477	4.81426
LOC_Os07g29750	glycosyl hydrolases family 16, putative, expressed	32.7958	50.3678	46.8318	21.2335	21.8896	16.0332	21.2814	12.8091	29.3215	17.4862	26.467	38.6166
LOC_Os03g15020	beta-galactosidase precursor, putative, expressed	17.4907	34.0233	15.5834	16.8931	15.4781	14.3816	11.8715	6.95581	17.9485	14.2635	16.3508	20.7644
LOC_Os11g14400	polygalacturonase, putative, expressed	4.82606	7.60528	5.59098	5.64912	5.14287	4.00469	4.47379	2.75931	5.01922	5.1582	3.86806	6.25346
LOC_Os03g15050	phosphoenolpyruvate carboxykinase, putative, expressed	5.18168	25.7612	5.21287	4.89439	6.17132	6.13475	6.37199	2.5466	3.42867	4.70398	7.11304	6.35325
LOC_Os03g49610	Os3BGlu8	16.1917	14.4538	6.26069	22.4179	19.6901	16.7021	5.59702	5.51891	12.2226	13.211	8.85234	10.3687
LOC_Os03g49600	Os3BGlu7	132.297	172.585	69.837	92.9883	101.835	87.6775	62.7924	49.4414	78.1614	86.7252	80.0484	92.2897
LOC_Os03g03720	GADPH	36.4553	93.594	75.8819	28.5882	22.296	12.6432	36.7815	28.4582	61.0653	28.5218	38.0312	41.4964
LOC_Os04g17650	OsSUS7	0.0971827	0.266467	0.154924	0.0537184	0.280068	0.150567	0.0292914	0.0260537	0.00836186	0.0535312	0.0507345	0.128755
LOC_Os04g46560	lactate/malate dehydrogenase, putative, expressed	1.28521	3.45886	1.50758	1.11155	1.07969	1.3262	0.713451	0.663259	0.760279	1.05231	0.795479	0.864827
LOC_Os02g46910	glycosyl hydrolases family 16, putative, expressed	8.33963	13.2415	13.8957	10.7181	8.82473	6.83578	14.9205	11.2754	14.2219	14.7451	23.295	23.0676
LOC_Os06g49970	alpha-amylase precursor, putative, expressed	1.67695	2.50184	3.25726	2.38887	2.55909	2.29096	1.60535	0.539592	2.20971	2.08836	2.31374	2.47194
LOC_Os09g33710	Os9BGlu33	3.10915	2.71716	1.92668	1.79901	2.12927	1.49068	0.555048	0.682303	1.70358	1.40987	0.956247	1.4123
LOC_Os01g51754	alpha-amylase precursor, putative, expressed	6.18061	5.96153	5.24675	9.53405	8.01866	8.192	14.9788	10.6948	13.0756	10.0217	11.1717	10.3491
LOC_Os02g51680	uncharacterized glycosyl hydrolase Rv2006/MT2062, putative, expressed	8.81752	23.5446	10.9203	5.6322	9.4913	7.08995	7.78089	1.4714	8.8206	8.16665	9.62691	7.09619
LOC_Os10g26570	phosphofructokinase, putative, expressed	8.52668	8.6735	10.3321	11.6817	11.9265	12.1965	16.4168	13.978	17.1096	16.0319	18.0776	17.5224
LOC_Os02g51620	glycosyl hydrolase family 3 protein, putative, expressed	37.8588	47.1094	22.7418	26.2729	26.22	24.328	18.8274	11.7743	23.7816	20.9479	24.2974	29.735
LOC_Os02g07260	OsPgk2	465.628	356.554	447.804	333.59	404.84	485.256	481.437	587.997	410.205	444.831	382.017	383.634
LOC_Os02g07490	glyceraldehyde-3-phosphate dehydrogenase, putative, expressed	81.868	36.9996	73.7275	63.9014	73.0702	88.853	89.2804	92.8638	73.1478	93.2409	84.1786	68.2963
LOC_Os11g19160	beta-D-xylosidase, putative, expressed	33.3988	0.198419	132.181	35.144	63.8431	30.7531	310.483	424.638	169.901	173.172	231.199	155.104
LOC_Os01g44970	polygalacturonase, putative, expressed	2.22369	2.68712	0.254404	0.259274	1.27749	2.41885	0.714302	0.0827019	0.349507	0.170718	0.315977	0.890068
LOC_Os02g36770	galactosyltransferase family protein, putative, expressed	0.0971892	0.0137712	0.174247	0.070889	0.134466	0.159037	0.53838	0.880961	0.31108	0.492712	0.279356	0.197518
LOC_Os03g62090	CESA5 - cellulose synthase, expressed	33.6048	41.4346	16.6177	37.2002	35.591	36.1807	8.45612	13.8194	19.583	18.1552	11.4478	18.2685
LOC_Os02g54890	UDP-glucuronate 4-epimerase, putative, expressed	23.7725	16.409	23.1065	30.3139	24.7811	23.4768	31.3813	59.7227	32.3619	26.4146	41.799	37.6624
LOC_Os06g37560	OsBGal2	47.2449	88.5906	44.255	45.9144	41.9903	35.2417	20.5941	9.82063	34.2155	28.8669	34.3006	54.8845
LOC_Os03g50480	phosphoglucomutase, putative, expressed	288.405	220.922	224.989	283.373	298.471	361.997	307.796	393.082	297.804	332.543	270.353	265.681
LOC_Os02g36600	aldose 1-epimerase, putative, expressed	11.559	18.7373	15.4126	11.2183	11.2835	7.2576	11.05	6.1488	13.3216	11.4413	8.62762	10.1775
LOC_Os03g03350	polygalacturonase, putative, expressed	43.9994	78.2878	58.7718	48.4892	40.5415	39.4959	39.2292	17.9472	37.4228	32.9055	63.83	70.9492
LOC_Os05g20020	polygalacturonase, putative, expressed	15.1072	14.3297	1.38665	0.879546	2.21966	6.73841	5.11543	1.54149	0.47345	0.298429	0.866534	6.24255
LOC_Os01g27880	OsSPP	26.2707	16.7518	27.4053	25.6662	31.8171	33.183	56.3956	63.8264	37.6296	50.6441	42.13	30.6107
LOC_Os01g47400	OsMan01 - Endo-Beta-Mannanase, expressed	48.1193	98.8828	60.53	33.95	33.3197	24.4257	30.2822	15.0912	39.3065	35.3399	41.8616	53.3846
LOC_Os03g56869	ribose-5-phosphate isomerase A, putative, expressed	4.24664	3.87186	2.32553	3.87502	3.35746	2.9444	1.96468	1.03711	2.17198	2.1402	2.21016	2.08725
LOC_Os04g46760	trehalose phosphatase, putative, expressed	14.4811	6.96232	10.7287	10.5967	12.2538	18.6742	17.7184	18.7711	11.6101	19.0865	14.2218	7.69578
LOC_Os10g07290	glycosyl hydrolases family 17, putative, expressed	3.20645	5.23266	2.69476	2.79532	2.82796	2.34916	2.41629	1.29724	2.67429	2.28279	2.35286	2.54219
LOC_Os03g48610	galactosyltransferase family protein, putative, expressed	3.51132	4.97307	1.4262	3.84271	4.76214	3.79313	0.553542	0.551402	1.12929	1.77458	0.783037	1.69426
LOC_Os09g39570	beta-amylase, putative, expressed	9.57516	12.7934	6.19054	8.43944	10.2713	10.4608	38.4183	28.1424	16.3922	14.2688	17.598	15.2705
LOC_Os04g58110	pyruvate kinase, putative, expressed	106.555	125.082	81.7129	88.2296	82.8519	90.8093	68.0784	50.7094	100.867	79.8249	86.3015	102.921
LOC_Os03g07300	RPE	18.3865	21.0077	14.5406	16.4146	16.0587	15.4248	10.4566	7.08523	13.9354	13.6495	13.689	13.9933
LOC_Os07g38930	glucan endo-1,3-beta-glucosidase precursor, putative, expressed	15.2393	16.3313	12.2046	20.8733	18.2469	19.7923	6.60495	7.13126	15.764	14.242	11.6988	13.2632
LOC_Os02g50040	OsGH9B1	1.26386	2.27605	0.851362	0.66298	0.82472	0.616808	0.730998	0.484842	1.1388	0.822507	0.984164	0.90797
LOC_Os07g34580	glycosyl hydrolases family 16, putative, expressed	5.01269	5.26794	3.47162	2.86331	3.67866	3.58101	5.56554	3.68245	4.76333	5.85365	7.18937	7.68158
LOC_Os12g23170	Os12bglu38 - beta-glucosidase/beta-mannosidase/exoglucanase homologue, expressed	121.935	4.3143	357.308	161.803	270.624	219.954	978.879	985.154	483.999	613.84	689.65	402.488
LOC_Os02g58480	sucrose synthase, putative, expressed	0.927587	1.40417	0.796083	0.863536	0.81662	0.64988	0.466075	0.419076	0.467622	0.402196	0.401931	0.439415
LOC_Os05g15880	OsXIP	0.854426	1.17685	1.04847	1.28607	2.48464	1.03352	1.49116	0.43424	1.71367	1.91408	5.04957	4.12702
LOC_Os01g32364	Os7BGlu26	6.21683	7.72375	3.98825	7.63759	6.67408	5.90956	2.76778	3.80219	6.54411	5.26499	4.49689	4.94829
LOC_Os07g42490	RSUS3|SUS3	1.74454	3.15595	1.27914	1.89834	1.3096	1.92602	1.05159	0.635269	1.35612	1.31811	2.13632	2.35844
LOC_Os04g53950	glycosyl hydrolases family 16 protein, protein, expressed	24.1082	41.1124	19.5571	25.8135	28.36	20.9912	8.35279	6.50474	21.6711	14.5369	14.3428	14.4308
LOC_Os05g15770	OsHI-XIP	10.1266	38.7345	36.0302	62.3506	37.8733	36.5889	34.3846	17.4178	26.7009	41.3402	65.846	71.3095
LOC_Os01g47070	glycosyl hydrolase, putative, expressed	0.630793	1.94099	0.996544	1.04097	1.47431	1.42491	20.0578	7.21584	4.68742	6.8067	21.9282	24.4711
LOC_Os07g30160	trehalose phosphatase, putative, expressed	0.0184966	0.0451834	0.0862384	0.050593	0.106478	0.120937	1.20277	0.952433	0.396426	0.455614	0.456157	0.346523
LOC_Os07g13580	glucan endo-1,3-beta-glucosidase precursor, putative, expressed	0.0989682	0.190974	0.0633166	0.0707198	0.101264	0.0678452	8.69738	5.3435	2.77789	2.13772	5.34677	3.09896
LOC_Os03g62860	glucan endo-1,3-beta-glucosidase precursor, putative, expressed	0.201248	0.269804	0.321353	0.495694	0.130829	0.133934	0.719892	0.268352	0.48866	0.729725	0.99527	1.29541
LOC_Os01g03950	glycosyl hydrolase, family 31, putative, expressed	12.8907	21.2932	13.7114	12.4336	11.0297	9.86965	5.7685	5.22987	15.4618	8.2628	7.73729	11.4186
LOC_Os03g11420	Os3BGlu6	41.9689	14.7602	68.0626	54.6155	61.2733	58.4796	128.254	86.8236	78.5285	77.9922	120.165	118.732
LOC_Os06g06560	OsSSI|SSS1	40.751	26.4705	34.7544	44.2234	43.6329	52.1865	46.5899	50.5995	51.5772	54.3308	52.2362	43.32
LOC_Os09g15820	aldose 1-epimerase, putative, expressed	28.2764	19.2784	25.3748	24.4923	27.7401	33.5322	38.6267	38.9355	27.9859	35.0153	39.0489	26.6033
LOC_Os10g37660	OsTRE1	39.3616	10.5216	41.9764	43.6187	33.894	36.64	31.6416	41.1034	54.9359	37.1237	39.2736	39.6744
LOC_Os01g03710	mannose-6-phosphate isomerase, putative, expressed	208.711	76.5205	185.796	270.957	211.295	253.861	194.251	140.651	183.4	189.221	240.918	237.623
LOC_Os09g08072	OSINV1	13.5633	21.0328	18.5303	14.5695	12.5327	9.66628	13.8826	13.288	18.2329	13.5225	14.1633	17.6664
LOC_Os07g13980	OsAPL4|OsAGPL4	4.68896	1.83387	6.59818	5.31327	7.11659	9.98281	46.2922	48.1003	21.1111	31.4947	25.2627	14.9773
LOC_Os09g15420	NAD dependent epimerase/dehydratase family protein, putative, expressed	6.91214	4.08495	6.98741	6.89339	7.16013	7.28169	21.4005	20.0859	12.8142	18.1736	15.9493	10.6694
LOC_Os05g08370	CESA1 - cellulose synthase, expressed	154.057	196.492	104.817	169.384	160.608	159.255	60.646	75.1487	122.118	102.415	81.3689	110.417
LOC_Os04g40150	glycosyl transferase family 17 protein, putative, expressed	7.06481	8.50524	4.92658	6.14478	5.75321	5.20969	18.7584	10.4985	8.1218	8.11532	12.6585	9.34909
LOC_Os10g21110	glycosyl hydrolase family 10 protein, putative, expressed	362.968	3.07763	719.822	289.332	478.869	361.702	1210.6	1813.03	831.221	921.251	849.258	544.592
LOC_Os07g07550	galactose-1-phosphate uridyl transferase, putative, expressed	14.3295	9.57986	10.167	11.614	13.1714	14.5507	14.9885	22.5052	12.8369	16.2846	12.7543	11.97
LOC_Os01g66940	OsFKI	65.3176	31.7547	72.5176	47.423	59.0602	58.5917	108.904	91.0249	54.8023	75.2118	89.2923	63.2206
LOC_Os04g40490	glycosyl hydrolase family 5 protein, putative, expressed	1.57679	2.05568	1.44135	2.37595	1.76403	1.78182	0.557993	0.474923	1.19197	0.903577	0.644946	1.07574
LOC_Os02g50620	dehydrogenase E1 component domain containing protein, expressed	153.941	122.699	155.552	147.99	164.129	182.393	200.891	258.622	177.215	198.234	184.354	159.888
LOC_Os04g24430	OsSUS5	0.484827	0.86814	0.253855	0.527345	0.627496	0.350349	0.204023	0.185419	0.216567	0.293099	0.2004	0.354646
LOC_Os01g04290	glycosyl hydrolase family 10 protein, putative, expressed	2.07986	1.566	4.20479	2.29349	2.34011	1.87547	4.75393	2.09045	2.76953	2.87422	6.63954	10.4764
LOC_Os12g20150	phosphoglucan, water dikinase, chloroplast precursor, putative, expressed	13.0538	12.7844	13.5983	17.4428	17.3933	22.3966	51.3722	51.6062	29.4961	31.7697	26.8256	25.1561
LOC_Os04g40510	glycosyl hydrolase family 5 protein, putative, expressed	1.60061	3.45257	1.56529	1.13858	0.86755	0.878893	0.965185	0.497146	1.03738	1.8091	2.68788	3.2969
LOC_Os04g40500	glycosyl hydrolase family 5 protein, putative, expressed	1.39632	2.60289	1.35239	1.67816	1.63998	1.83293	0.814705	0.851119	1.90787	2.01925	1.0807	1.50187
LOC_Os07g14160	polygalacturonase, putative, expressed	5.43426	7.38555	4.95019	7.22525	7.04112	6.69218	2.74867	1.27237	4.25377	4.85877	4.65724	5.49016
LOC_Os01g67860	fructose-bisphospate aldolase isozyme, putative, expressed	910.4	932.663	860.298	603.994	590.625	617.149	436.919	364.361	593.979	478.286	682.593	821.753
LOC_Os05g45590	hexokinase, putative, expressed	26.7068	16.1462	29.5891	24.2642	31.2985	37.1399	41.3482	49.1091	30.2693	41.9639	30.3854	22.7764
LOC_Os01g04300	glycosyl hydrolase family 10 protein, putative, expressed	8.13767	15.53	7.66434	7.42284	6.20959	3.64247	3.13321	3.09854	4.69325	4.78459	4.50862	7.64101
LOC_Os05g33140	CHIT5 - Chitinase family protein precursor, expressed	121.757	137.513	128.033	106.417	91.8322	63.9266	134.234	83.2892	127.58	150.568	151.621	189.927
LOC_Os05g33150	CHIA1;175	2155.19	2734.5	2926.05	2126.09	1954.02	1387.45	3030.68	1806.41	2801.52	3855.51	3972.1	5273.35
LOC_Os05g33130	Cht-2	0.116117	1.18297	0.699131	0.444088	0.463064	0.236598	2.29305	0.988432	0.921358	2.29838	4.55614	6.47842
LOC_Os07g46280	Os7bglu26 - beta-mannosidase/glucosidase/exoglucanase, expressed	24.1768	35.5358	18.7692	20.1933	17.7393	17.036	9.0886	5.57137	13.9695	14.2901	11.9093	15.2279
LOC_Os07g07340	glucan endo-1,3-beta-glucosidase precursor, putative, expressed	3.52748	5.85389	4.31937	4.55446	4.26788	3.31226	1.46069	0.760181	3.6344	2.40877	2.72941	3.65407
LOC_Os01g43160	polygalacturonase, putative, expressed	21.3651	25.7939	33.1367	34.0995	29.0692	22.901	48.6353	32.3419	47.9454	43.2625	65.1321	61.8637
LOC_Os08g39350	glycerophosphoryl diester phosphodiesterase family protein, putative, expressed	30.1178	14.7154	22.611	44.1342	39.7645	46.7544	52.0206	42.9916	59.6394	46.9265	43.9918	54.3793
LOC_Os11g45710	Os11bglu36 SFR2 homologue, expressed	2.74993	2.5493	3.54593	3.09144	3.95724	5.02816	10.1274	11.4238	5.49894	6.77765	5.96659	4.07742
LOC_Os04g40874	OsG6PDH2	46.1365	57.6791	44.2759	46.2804	46.0519	45.6758	19.1182	16.9732	33.555	30.1289	29.4097	35.938
LOC_Os05g45860	glucan endo-1,3-beta-glucosidase precursor, putative, expressed	9.24122	1.26278	5.13486	8.12386	6.99627	8.15161	4.98849	3.27174	3.88949	4.17075	3.93391	4.88639
LOC_Os03g28330	sucrose synthase, putative, expressed	468.622	1007.04	442.289	548.058	464.576	368.81	94.1218	108.206	267.524	222.189	170.612	242.007
LOC_Os03g11980	beta-hexosaminidase precursor, putative, expressed	12.7408	5.22599	16.036	11.4261	13.2473	10.9038	23.0279	28.8881	15.3843	20.5854	15.5901	14.573
LOC_Os07g46790	OsDPE2	38.6742	31.9757	49.4093	45.6751	47.9202	72.2424	207.471	213.426	131.207	137.201	124.206	101.239
LOC_Os11g37970	WIP5 - Wound-induced protein precursor, expressed	2.4567	9.34753	7.00426	5.6265	6.09204	4.37013	42.8041	27.6851	21.5619	49.2203	78.4441	63.8256
LOC_Os11g37960	WIP4 - Wound-induced protein precursor, expressed	0.978875	2.16293	1.06135	1.28962	1.73821	1.4592	9.60215	4.92524	4.42723	8.79953	15.6441	15.9616
LOC_Os11g37950	WIP3 - Wound-induced protein precursor, expressed	0.592442	1.67202	0.918702	1.69006	1.22415	1.36049	4.06183	2.39662	2.56387	6.41218	8.66459	9.23945
LOC_Os05g41590	glycerol-3-phosphate dehydrogenase, putative, expressed	2.69057	3.16715	1.52838	2.28063	2.04045	1.63125	1.3343	8.99468	1.74952	1.81374	1.45698	1.83771
LOC_Os10g19960	beta-galactosidase, putative, expressed	1.916	3.74275	1.26502	0.764435	1.32131	1.19128	0.0869144	0.180222	0.24125	0.111085	0.139295	0.12518
LOC_Os02g04670	glucan endo-1,3-beta-glucosidase precursor, putative, expressed	10.5416	15.5317	8.78734	10.4419	9.8611	10.6507	5.20022	5.28132	9.83491	6.5112	5.6226	7.4905
LOC_Os05g04690	CHIT11 - Chitinase family protein precursor, expressed	0.238928	0	0.603854	0.20064	0.466429	0.352299	1.2062	1.26967	0.584979	0.886583	1.08455	0.559754
LOC_Os01g16310	glycosyl hydrolase, family 31, putative, expressed	0.302277	0.777832	1.00909	0.700205	0.228891	0.445912	1.31224	1.26665	1.20044	0.549563	0.84749	1.0889
LOC_Os01g67364	retrotransposon protein, putative, Ty3-gypsy subclass, expressed	0.221918	0.154165	0.20168	0.253031	0.138184	0.28673	0.465003	0.827024	0.109977	0.396032	0.202984	0.232026
LOC_Os06g14740	NAD binding domain of 6-phosphogluconate dehydrogenase containing protein, expressed	12.4757	17.9539	9.03441	16.5596	15.3455	16.2418	9.86649	6.86087	9.5989	11.3741	11.6964	14.6529
LOC_Os06g46340	glycosyl hydrolase, family 31, putative, expressed	0.226376	1.08384	0.374973	0.254364	0.2148	0.132557	0.383385	0.325505	0.287661	0.389983	0.475877	0.511857
LOC_Os06g46372	dehydrogenase, putative, expressed	17.4411	17.9513	14.9613	19.7888	18.5482	18.4565	11.6939	7.20725	11.8628	15.1113	15.6475	17.7856
LOC_Os04g16680	fructose-1,6-bisphosphatase, putative, expressed	39.8633	35.6693	16.7193	23.2659	21.2462	22.3898	25.7798	6.07863	17.0999	17.2719	22.2477	32.8306
LOC_Os06g46284	glycosyl hydrolase, family 31, putative, expressed	7.31615	11.9261	10.9188	10.2838	6.99688	5.92632	3.68704	2.94477	13.9033	9.89025	17.0147	16.3278
LOC_Os04g57860	endoglucanase precursor, putative, expressed	0.954274	0.0355228	1.15959	0.632059	1.10192	1.03277	0.873863	0.611066	0.292215	0.646752	0.527767	0.605961
LOC_Os09g34920	glycosyl hydrolase family 29, putative, expressed	40.7779	89.7548	57.1865	40.9731	33.3055	25.1858	13.2614	12.9742	40.2783	24.66	20.3912	37.183
LOC_Os07g10770	OsCesA8	138.338	200.486	103.86	150.475	141.952	122.49	58.7525	57.8902	105.1	86.3613	73.2341	103.516
LOC_Os01g59819	Os1bglu2 - beta-glucosidase homologue, similar to G. max isohydroxyurate hydrolase, expressed	0.449411	0.757905	0.448501	0.251537	0.189345	0.438872	0.043324	0.114734	0.177312	0.0795313	0.0574406	0.040576
LOC_Os07g22350	OsG6PDH3	23.7755	17.8535	22.8097	23.8375	26.1526	28.3855	25.4714	32.1633	25.7017	29.1653	23.9505	19.7992
LOC_Os01g59840	Os1bglu3 - beta-glucosidase homologue, similar to G. max isohydroxyurate hydrolase, expressed	1.7284	2.39261	0.905106	2.32042	2.24555	2.04391	0.978227	0.360389	0.753484	1.09675	1.47497	1.02742
LOC_Os04g47280	ATFUC1, putative, expressed	5.54934	5.03945	4.17963	6.0821	5.71965	7.09536	2.34898	2.24174	5.10285	4.82458	3.75797	4.34433
LOC_Os06g14540	endoglucanase, putative, expressed	39.7946	61.5622	46.2582	34.7202	28.5658	23.5665	13.1436	13.1806	33.926	16.6468	13.6309	34.0081
LOC_Os03g02610	glycosyl hydrolases family 16 protein, protein, expressed	8.36131	11.6505	7.26644	5.30556	5.69497	4.28293	3.83339	2.73648	5.75588	4.98737	4.4805	6.98519
LOC_Os06g14510	PGI2	53.4128	41.7717	47.9773	62.9817	69.7287	82.1325	82.3215	91.0861	74.8133	87.2126	78.2173	70.8199
LOC_Os01g73580	glycosyl hydrolases, putative, expressed	1.18207	1.37401	0.860158	0.886979	1.03181	1.22108	1.7183	0.378311	0.866164	0.63868	1.16602	1.2535
LOC_Os01g43220	chitinase domain-containing protein 1 precursor, putative, expressed	4.07552	2.20171	3.42338	3.8142	3.92296	4.2187	3.5822	4.89758	4.96143	4.45873	4.25232	2.86638
LOC_Os05g09500	OsHXK7	31.2602	45.8642	25.1602	16.8755	26.6123	21.9654	9.333	6.16138	10.3952	9.85696	10.6956	9.70262
LOC_Os06g46570	galactosyltransferase, putative, expressed	28.0557	12.2787	27.0149	43.1738	33.1493	43.7036	55.1586	56.9423	59.4397	48.1359	64.8159	56.5127
LOC_Os03g51610	Inositol 1, 3, 4-trisphosphate 5/6-kinase, putative, expressed	8.89148	8.54414	11.0421	9.96016	9.64875	10.5076	14.1086	17.453	11.5923	11.4968	9.80236	7.95127
LOC_Os01g33300	polygalacturonase, putative, expressed	0.500152	0.0171486	7.22821	0.999266	4.30372	2.45019	98.4464	63.8039	26.1472	27.5772	50.9741	31.3746
LOC_Os04g35020	CSLH2 - cellulose synthase-like family H, expressed	6.27411	6.02523	6.42149	5.41839	5.80171	6.61655	17.4913	14.134	9.77439	10.0456	11.6073	9.32813
LOC_Os01g33230	UDP-N-acetylglucosamine--N-acetylmuramyl-pyrophosphor yl-undecaprenol N-acetylglucosamine transferase, putative, expressed	2.00795	1.67192	1.36809	2.45068	2.91783	2.45209	3.09221	3.37565	2.71611	2.69409	2.45983	2.25317
LOC_Os02g53200	Gns1	56.8171	44.9816	61.8888	52.938	58.4717	54.0753	72.2195	63.3456	73.9707	68.9297	87.1372	104.797
LOC_Os05g37450	starch binding domain containing protein, putative, expressed	9.76837	7.61777	8.2525	7.06519	8.69167	8.40661	10.9417	17.9458	6.77286	7.44408	7.89751	9.10369
LOC_Os07g49520	2-oxoglutarate dehydrogenase E1 component, mitochondrial precursor, putative, expressed	41.7768	36.6868	42.6337	41.9573	45.7116	49.3562	60.0042	61.0961	44.5717	47.5044	44.6731	48.2872
LOC_Os02g05030	sucrose-phosphatase, putative, expressed	103.369	96.0243	90.6916	99.5912	104.752	117.511	183.427	201.991	148.858	162.687	159.124	129.941
LOC_Os08g43570	beta-galactosidase precursor, putative, expressed	9.64649	0.184432	41.4221	16.6057	27.2661	21.0651	208.73	249.334	116.483	107.313	109.713	86.5039
LOC_Os02g44230	OsTPP1	50.539	12.195	28.2748	41.6081	34.2682	54.1837	16.5956	32.4132	6.00535	9.76073	17.4041	25.3456
LOC_Os02g44235	expressed protein	39.1782	9.08929	23.0621	29.6057	24.4345	34.8896	14.9933	27.9664	4.83918	8.3619	14.401	19.3991
LOC_Os05g25480	OsMan06 - Endo-Beta-Mannanase, expressed	0.439151	0.898688	1.0383	1.71233	0.774488	0.501708	0.415441	0.364584	1.06351	1.3916	1.64159	2.55654
LOC_Os07g41280	6-phosphogluconolactonase, putative, expressed	54.7983	69.6386	61.5287	76.8158	66.1035	59.8559	37.5135	28.0861	51.4531	55.4632	72.4428	52.8502
LOC_Os02g57180	NADH dehydrogenase 1 alpha subcomplex subunit 9,mitochondrial precursor, putative, expressed	71.6962	60.2493	71.8655	68.6391	79.5643	85.1635	108.296	122.267	96.9786	117.836	103.21	86.65
LOC_Os01g19170	polygalacturonase, putative, expressed	4.14775	5.24108	1.67835	1.22462	2.16606	1.23126	2.43197	0.797755	0.740719	1.63412	1.41653	2.36869
LOC_Os07g41150	glycerophosphoryl diester phosphodiesterase family protein, putative, expressed	55.9117	7.19622	67.4416	30.1406	50.0639	58.5193	41.1286	63.2772	30.1053	52.0003	38.7951	28.2602
LOC_Os01g19220	beta-D-xylosidase, putative, expressed	2.5768	4.34196	2.22328	3.04665	1.67512	1.44091	1.83902	1.23796	2.17727	2.26479	2.73798	3.94852
LOC_Os03g47010	glycosyl hydrolase family 10 protein, putative, expressed	0.584038	1.74346	0.39952	0.792737	0.689352	0.65487	0.146126	0.127691	0.561281	0.23418	0.377571	0.465329
LOC_Os03g12140	glucan endo-1,3-beta-glucosidase precursor, putative, expressed	1.94948	3.39227	2.91335	1.48758	1.80479	1.22059	1.97386	1.14216	1.99151	1.63599	2.13003	1.45285
LOC_Os04g52730	NAD dependent epimerase/dehydratase family domain containing protein, expressed	18.663	17.9984	19.6716	22.6775	22.3194	23.9383	30.5879	33.4034	27.9182	33.2476	28.3523	26.165
LOC_Os08g43370	6-phosphogluconolactonase, putative, expressed	17.2327	7.47259	25.5302	12.2483	17.8737	12.7907	33.6984	42.4989	21.0822	31.3036	24.8462	18.632
LOC_Os03g63760	glycosyl hydrolases family 16, putative, expressed	1.94176	2.89799	1.34305	1.57477	1.05436	0.865517	1.10053	0.353883	0.871494	0.61876	0.946927	0.986517
LOC_Os06g36560	OsMIOX	185.175	259.832	164.015	196.407	199.764	189.182	69.7496	48.3407	119.538	110.973	123.508	164.987
LOC_Os01g19450	ATP-citrate synthase subunit 1, putative, expressed	164.405	179.528	112.276	137.16	138.621	138.12	63.8924	66.3971	92.2933	93.3062	74.7135	101.802
LOC_Os03g18520	glucan endo-1,3-beta-glucosidase 9 precursor, putative, expressed	4.29607	2.52719	4.34718	2.90069	4.35463	3.19455	4.63552	5.14826	3.8353	4.9814	2.76621	2.85204
LOC_Os05g02510	beta-hexosaminidase precursor, putative, expressed	15.7131	19.0768	11.9543	17.9856	17.7126	18.2186	8.00026	7.31383	13.1953	13.6905	11.567	14.2571
LOC_Os11g47500	glycosyl hydrolase, putative, expressed	0.0592007	0.794427	1.04539	0.368703	0.0258807	0	0.572465	0.234118	0.225581	0.49538	0.928403	0.469789
LOC_Os01g70520	Os1bglu5 - beta-glucosidase homologue, similar to G. max isohydroxyurate hydrolase, expressed	15.466	22.7447	10.4374	11.4046	10.4805	10.764	6.99531	4.70293	12.0529	9.03757	8.40298	10.6884
LOC_Os03g12360	trehalose-6-phosphate synthase, putative, expressed	12.8726	21.6305	15.2402	14.9315	13.8446	10.471	9.36272	4.99907	14.2985	11.8734	12.387	13.7629
LOC_Os02g33000	glycosyl hydrolases family 17, putative, expressed	1.42295	1.52861	0.51122	0.292706	0.664345	0.465293	2.89634	3.2063	1.30062	1.65788	2.17084	1.92681
LOC_Os11g47600	glycosyl hydrolase, putative, expressed	0.057421	0.160941	0.128419	0.294542	0.0918688	0.095303	0.350897	0.0895093	0.506144	0.536611	0.68225	0.687755
LOC_Os03g06940	OsBGal1	95.773	128.048	53.1311	86.4789	85.5961	86.4264	22.5175	14.572	39.8741	43.0005	34.9235	62.1232
LOC_Os08g31630	uncharacterized glycosyl hydrolase Rv2006/MT2062, putative, expressed	6.20219	7.32255	8.19979	7.00549	5.51698	4.50503	8.65858	13.9211	5.15443	4.24384	5.55965	5.24544
LOC_Os11g47350	beta-D-xylosidase, putative, expressed	105.261	92.864	79.9771	46.3282	46.4275	46.5144	10.9063	14.2931	20.273	21.2433	10.8797	27.9025
LOC_Os03g12620	glycosyl hydrolases family 17, putative, expressed	0.872537	1.36995	0.836915	0.765148	0.497672	0.333508	0.349688	0.545012	0.564739	0.512725	0.555374	1.06612
LOC_Os07g14850	CESA6 - cellulose synthase, expressed	35.3983	41.3367	18.4363	31.5779	29.5856	28.5758	12.1929	26.9212	20.6579	17.3606	13.0861	20.8234
LOC_Os05g32710	OsISA2	7.97317	4.97658	10.2606	7.97735	9.11371	9.95273	26.5284	29.741	17.929	16.1609	15.4155	12.8742
LOC_Os02g05744	endoglucanase, putative, expressed	6.26252	7.44387	4.13744	3.65738	3.46535	3.43242	2.93475	1.95253	2.7667	3.3435	2.83607	5.80717
LOC_Os09g36060	endoglucanase, putative, expressed	24.3221	2.15382	41.5755	52.0799	31.3002	25.9501	46.1231	24.81	64.9774	52.63	101.056	82.8035
LOC_Os03g20300	OsG6PDH5	6.86924	6.2771	5.9912	9.37874	8.92944	8.05238	2.59424	2.3115	4.85162	5.03394	3.63103	3.37247
LOC_Os01g65590	galactosyltransferase, putative, expressed	329.823	72.2036	373.161	256.199	206.784	208.213	301.698	230.015	311.932	198.928	227.13	301.05
LOC_Os11g12810	OsSPS11	0.245431	0.430346	0.461385	0.496109	0.236956	0.313224	0.621971	0.409126	1.17262	0.978705	1.44806	1.30399
LOC_Os08g31980	trehalose-6-phosphate synthase, putative, expressed	3.89233	6.34574	4.11949	5.43838	4.17179	4.35404	5.24372	2.42177	4.05106	4.96011	5.12601	4.78924
LOC_Os02g49332	CSLE2 - cellulose synthase-like family E, expressed	11.8225	17.1243	9.91205	11.6294	9.92035	10.4402	8.78098	6.55319	10.2015	9.11048	9.21985	10.3277
LOC_Os03g55090	Pho1	11.9435	14.8454	21.8684	17.9586	15.9718	18.1848	21.4944	33.0004	29.8528	23.8931	14.4457	10.2842
LOC_Os04g41680	OsChia4a	1.83397	6.62877	5.3656	3.67501	3.36348	3.09492	29.7529	20.7754	18.5481	24.8584	38.9404	32.1555
LOC_Os04g41640	HEV2 - Hevein family protein precursor, expressed	0.850559	4.80495	3.65353	3.13451	4.08764	3.54839	15.7948	14.0975	13.6258	21.6835	24.6733	23.9035
LOC_Os04g41620	CHIT2 - Chitinase family protein precursor, expressed	5.39278	18.2804	19.8888	12.8693	13.7204	7.82775	83.8612	50.3236	48.6274	73.163	143.638	111.307
LOC_Os01g54620	OsCesA4|Bc7|bc11	288.686	338.762	254.878	291.643	277.054	259.884	118.68	109.396	192.2	154.873	121.874	169.669
LOC_Os01g21070	endoglucanase, putative, expressed	0.746709	2.46204	0.413677	0.539122	0.699484	0.481491	0.365114	0.23454	0.4418	0.545716	0.407474	0.351803
LOC_Os04g35270	alpha-1,4-fucosyltransferase, putative, expressed	0.314012	1.21742	0.28304	0.785201	0.71041	0.256931	0.036038	0.0156551	0.0987621	0.287604	0.288693	0.262687
LOC_Os02g12730	beta-galactosidase precursor, putative, expressed	18.0899	42.0313	15.7727	15.3818	15.7416	12.2775	5.28926	4.13945	7.00789	7.24226	7.41092	11.2952
LOC_Os02g32660	OsBEIIb	42.0882	13.6905	44.6482	54.567	49.9834	70.6114	156.038	144.094	80.107	89.7951	84.91	73.3982
LOC_Os09g23084	endoglucanase, putative, expressed	6.75169	6.36736	10.5688	8.84262	8.2534	4.9177	8.28946	7.75451	12.3704	13.2674	13.3358	14.1488
LOC_Os01g74000	glycerol-3-phosphate dehydrogenase, putative, expressed	2.79289	1.8313	3.07464	2.42879	2.906	2.95003	9.36597	7.2977	4.3265	5.10433	6.43419	3.45116
LOC_Os10g32810	beta-amylase, putative, expressed	41.1097	1.50697	189.679	84.3522	138.381	108.484	980.272	1064.95	538.526	802.393	738.6	448.45
LOC_Os06g50140	endoglucanase, putative, expressed	3.94821	0.389264	9.59434	4.09032	7.0713	4.64598	21.8265	21.2144	10.4113	13.5975	14.3422	9.85573
LOC_Os03g29950	glucose-6-phosphate 1-dehydrogenase, chloroplast precursor, putative, expressed	0.954515	5.85004	4.14927	1.96697	1.54933	1.07515	0.467699	0.982153	3.4127	0.912426	0.661567	0.517474
LOC_Os09g23350	trehalose synthase, putative, expressed	10.3876	22.51	11.8689	15.513	13.2421	10.6054	5.84222	5.46149	10.0654	8.07148	8.32435	10.8356
LOC_Os04g30770	glycosyl hydrolase, putative, expressed	0.50518	0.497804	0.886907	0.481646	0.503068	0.224562	0.649354	0.311431	0.665797	0.464543	0.561624	0.785447
LOC_Os04g41970	OsGLU3|RT	1.50286	1.79513	3.08132	1.64655	2.26684	1.07019	7.43711	7.08951	3.64322	3.03332	4.46795	4.17037
LOC_Os07g01770	OsSMCP1	3.18276	2.44138	5.78487	3.84195	4.94775	13.3147	87.5423	65.313	35.1986	50.6881	48.3879	21.2288
LOC_Os05g44360	oligosaccharyl transferase, putative, expressed	42.7917	28.9933	36.4668	39.8939	42.9524	50.4986	43.6982	49.0851	37.8396	45.7586	36.1245	33.1255
LOC_Os06g08380	GSL5|OsGSL5	69.8476	24.2383	66.6361	107.216	81.7346	95.1755	85.951	80.8116	87.304	64.9527	63.197	85.563
LOC_Os03g01800	glycosyl hydrolases family 16, putative, expressed	34.6904	115.267	47.7701	15.9757	31.091	17.5099	2.38543	2.20817	4.75221	6.74342	3.05174	19.7116
LOC_Os04g56920	glycosyl hydrolases, putative, expressed	0.293347	0.0270115	0.435189	0.159744	0.258665	0.376451	0.497838	0.262438	0.199476	0.601881	0.388663	0.297764
LOC_Os11g36940	glucan endo-1,3-beta-glucosidase precursor, putative, expressed	7.93167	20.875	5.5083	5.30582	5.56003	4.07592	0.448847	0.787954	1.78159	1.40816	0.398106	3.85086
LOC_Os10g42670	glycosyl hydrolases family 16, putative, expressed	8.2914	11.474	6.06154	5.20359	6.30208	4.74349	3.12343	1.79279	2.17338	2.92185	4.85725	7.23378
LOC_Os02g01510	lactate/malate dehydrogenase, putative, expressed	2.41725	3.01663	3.38231	1.23312	2.45177	1.56147	2.90313	3.09306	2.69252	3.45378	2.77818	3.31049
LOC_Os05g40420	2,3-bisphosphoglycerate-independent phosphoglycerate mutase, putative, expressed	223.341	140.625	213.772	224.818	273.733	334.174	229.328	309.057	199.715	243.119	200.525	164.052
LOC_Os01g53910	dehydrogenase, putative, expressed	6.84193	7.23334	8.18609	5.88705	5.28034	3.22143	6.11977	4.80263	7.03898	5.7801	5.6509	7.03628
LOC_Os12g05550	sialyltransferase family domain containing protein, expressed	7.94325	9.66305	4.80165	4.30703	4.79715	3.68684	4.67185	2.94279	4.4748	3.07131	2.61036	4.55462
LOC_Os02g01590	OSINV3|OsVIN2	37.7442	40.3559	20.9464	19.3617	23.0067	20.6159	60.5984	53.7509	24.3528	25.2104	33.332	61.4196
LOC_Os10g17650	Os10bglu34 - beta-glucosidase homologue, similar to Os3bglu6, expressed	11.1284	9.11441	34.8576	43.5828	24.6049	31.074	90.3112	50.5357	78.1093	58.2106	94.5737	88.1319
LOC_Os05g44760	OsHXK5	68.7013	36.1768	104.311	61.8541	80.0284	81.3283	230.741	238.981	136.148	158.421	156.256	104.96
LOC_Os10g42100	pyruvate kinase, putative, expressed	40.5902	27.0341	30.0089	36.0728	42.136	48.5399	47.848	51.3801	36.9928	50.1745	38.6395	32.6791
LOC_Os01g46950	aldose 1-epimerase, putative, expressed	13.864	19.9709	11.5569	9.4135	9.52695	10.0554	3.83203	3.39878	4.08509	4.50949	5.76946	6.79122
LOC_Os05g15510	cellulase, putative, expressed	23.279	31.5785	16.5918	19.4998	22.2451	21.0985	14.6045	6.74728	21.2545	21.0429	17.4009	21.4708
LOC_Os03g59330	polygalacturonase, putative, expressed	46.3815	59.5651	33.5369	25.845	33.5256	33.1835	2.87008	5.45369	11.4439	10.138	5.66255	19.7654
LOC_Os09g35800	UDP-glucose 4-epimerase, putative, expressed	759.5	1233.87	845.75	595.133	523.907	510.934	97.7998	105.929	310.969	299.808	277.92	522.557
LOC_Os04g39610	glycerophosphoryl diester phosphodiesterase family protein, putative, expressed	2.91283	5.40799	2.80351	3.33511	2.54947	2.01895	1.04858	1.04183	3.48513	1.72058	1.4712	1.73505
LOC_Os09g35970	6-phosphogluconolactonase, putative, expressed	63.4877	53.5893	62.2614	63.5052	67.8998	77.6627	122.729	145.708	97.8907	108.644	105.527	85.4589
LOC_Os10g08022	fructose-bisphospate aldolase isozyme, putative, expressed	0.409568	0.175541	5.95094	1.33973	3.00586	5.76371	182.886	129.619	48.1891	37.51	74.5909	55.2872
LOC_Os06g42310	beta-galactosidase precursor, putative, expressed	170.869	135.909	136.398	100.301	122.067	144.984	76.8762	106.357	93.9472	127.309	70.516	61.598
LOC_Os05g49430	aldose 1-epimerase, putative, expressed	32.6931	5.46867	34.3438	44.4604	39.3289	42.9097	46.7297	26.9943	46.1599	41.5189	55.2942	57.7476
LOC_Os02g09450	MTD1	0.367843	0	4.26032	1.66048	2.65876	4.6797	89.9837	73.1632	30.5232	31.9357	43.2292	26.7213
LOC_Os10g32980	OsCesA7	168.76	204.02	165.628	166.198	149.96	122.67	62.2888	77.0732	140.846	96.6438	70.0704	109.203
LOC_Os04g39880	Os4BGlu12	5.2631	22.1848	11.9949	8.84598	6.3008	4.42177	3.65484	2.5738	4.54126	4.71518	5.64028	4.91787
LOC_Os04g39840	Os4BGlu10	6.50274	7.61189	5.78807	8.95708	8.30389	7.47216	3.2831	2.1567	5.15918	6.08488	5.76186	6.60884
LOC_Os04g39864	Os4bglu11 - beta-glucosidase homologue, similar to Os4Bglu12 exoglucanase/beta-glucosidase, expressed	1.98009	4.44774	1.43944	2.5653	2.63892	2.26584	0.748185	0.761161	1.53463	1.31617	0.851505	1.26666
LOC_Os05g49070	dehydrogenase, putative, expressed	1.52126	1.18957	1.47639	1.71481	1.46432	0.981871	2.33953	3.1929	2.98721	2.51663	2.81102	1.61424
LOC_Os04g39900	OsTAGG1|Os4BGlu13	10.2939	15.7285	8.98407	13.5526	12.0524	10.3267	6.49207	6.20096	8.35873	8.60616	8.40606	8.85624
LOC_Os02g53820	endoglucanase, putative, expressed	0.0293359	0.0674679	1.11672	0.0268935	0.0723792	0.345121	39.382	26.8435	9.92621	7.75662	14.9831	11.9306
LOC_Os08g06380	CslF6	28.6165	43.9567	21.3596	24.9741	23.6876	16.0211	10.3843	16.7964	18.4407	13.9776	13.9993	23.2112
LOC_Os08g23790	polygalacturonase, putative, expressed	7.10841	0.0849612	63.5024	15.409	37.9787	22.3738	214.88	274.432	115.554	136.347	174.072	104.394

## Sheet: DEG_lipid
		SD8	SD12	SD16	SD20	SD24	SD4	LD8	LD12	LD16	LD20	LD24	LD4
LOC_Os01g01710	OsDXR	13.7632	14.5759	13.1114	11.432	13.7361	11.1013	7.30762	3.60274	8.36594	7.49518	11.9044	11.926
LOC_Os01g05670	3-oxo-5-alpha-steroid 4-dehydrogenase, putative, expressed	174.964	213.839	135.257	140.96	134.644	141.895	83.2074	57.9133	111.542	116.358	99.4571	124.887
LOC_Os01g11620	GDSL-like lipase/acylhydrolase, putative, expressed	191.039	319.138	159.092	187.491	163.658	153.549	50.8947	32.3596	74.8419	71.0462	105.017	133.894
LOC_Os01g11650	GDSL-like lipase/acylhydrolase, putative, expressed	3.2793	6.82215	4.81969	4.35158	4.761	3.61143	5.3972	3.34696	6.84305	6.96881	9.1854	10.9122
LOC_Os01g11710	GDSL-like lipase/acylhydrolase, putative, expressed	17.7646	35.7666	19.4291	15.9676	14.4675	9.13135	15.8712	8.67129	18.3217	17.7814	21.6265	26.9153
LOC_Os01g11740	GDSL-like lipase/acylhydrolase, putative, expressed	23.6406	7.43198	24.2731	13.7338	19.7526	22.0859	22.0904	32.6471	16.0223	22.7566	20.6756	13.9868
LOC_Os01g12304	esterase, putative, expressed	1.52408	2.38681	1.31513	1.63545	1.60683	1.58371	1.32202	0.515784	1.34179	0.944598	1.44704	1.97153
LOC_Os01g12320	GDSL-like lipase/acylhydrolase, putative, expressed	11.3133	15.3494	10.3375	11.3705	8.93752	9.30549	6.0552	5.5802	10.3883	7.18182	5.23358	7.85802
LOC_Os01g14630	OsGPPS	0.116566	0.736602	0.30028	0.458219	0.256562	0.115849	0.731795	0.933425	0.428499	0.900389	1.35112	1.59829
LOC_Os01g18630	aspartic proteinase oryzasin-1 precursor, putative, expressed	158.325	290.734	229.829	270.28	186.547	175.664	42.54	70.7715	199.131	132.903	96.3482	92.525
LOC_Os01g22640	GDSL-like lipase/acylhydrolase, putative, expressed	16.1955	21.0507	13.7191	12.7586	12.9393	10.392	9.63724	7.07438	11.3076	12.142	9.57561	13.2129
LOC_Os01g22660	GDSL-like lipase/acylhydrolase, putative, expressed	2.69275	3.91348	2.08305	1.99594	2.17737	2.46192	1.04828	0.774905	1.49105	1.22852	1.52569	1.56981
LOC_Os01g22780	GDSL-like lipase/acylhydrolase, putative, expressed	0.994723	2.06144	0.622801	0.327789	0.525866	0.38917	0.526139	0.176334	0.438245	0.397984	0.374827	0.273061
LOC_Os01g33230	UDP-N-acetylglucosamine--N-acetylmuramyl-pyrophosphor yl-undecaprenol N-acetylglucosamine transferase, putative, expressed	2.00795	1.67192	1.36809	2.45068	2.91783	2.45209	3.09221	3.37565	2.71611	2.69409	2.45983	2.25317
LOC_Os01g34560	3-ketoacyl-CoA synthase, putative, expressed	9.88915	13.7234	10.809	13.4849	9.72691	7.2507	7.83452	6.09274	12.5522	13.2117	15.1976	20.5345
LOC_Os01g39960	OsLCYe|OsLCYepsilon	20.6585	15.5577	16.3427	22.1137	20.6429	23.2407	6.39244	3.96626	10.3271	9.82018	11.2045	13.8882
LOC_Os01g43140	lipase, putative, expressed	7.96366	5.57222	13.061	11.419	8.4856	7.04969	18.7729	14.6557	19.3882	16.4913	22.9114	27.1424
LOC_Os01g44130	aspartic proteinase oryzasin-1 precursor, putative, expressed	3.05936	5.39232	1.68754	2.79221	2.96891	1.8586	0.610385	0.284063	1.06825	1.20649	0.70595	1.20996
LOC_Os01g45200	Snl6	20.8867	26.9027	22.6883	15.0854	17.0485	12.495	14.0705	8.33575	9.88027	11.8676	11.0175	16.7691
LOC_Os01g46240	lipase class 3 family protein, putative, expressed	2.88007	2.50917	4.20358	3.4821	3.04141	3.01066	5.62198	4.27192	4.75648	4.85036	4.42927	3.50721
LOC_Os01g46250	lipase, putative, expressed	3.58921	1.29699	6.49716	3.08328	5.43301	3.18576	18.0746	15.2249	8.31423	14.0227	12.9169	8.46345
LOC_Os01g46260	expressed protein	0.391858	0.9398	0.265772	0.0434358	0.237335	0.0770954	0.0256824	0	0.109974	0	0.0276798	0.358207
LOC_Os01g46290	lipase, putative, expressed	1.28082	3.1683	1.60773	1.24581	0.949164	0.758522	0.789506	0.586657	0.99709	1.15252	0.762225	1.70645
LOC_Os01g49024	phosphatidylserine synthase, putative, expressed	5.4241	2.79571	7.34066	4.4489	6.39993	5.80587	11.3924	13.1247	5.94065	9.06836	8.81805	5.81969
LOC_Os01g50050	polyprenyl synthetase, putative, expressed	6.22437	3.83981	6.55054	6.42858	5.98113	7.33834	12.6701	8.66232	7.92053	6.97352	8.91715	9.26505
LOC_Os01g51360	lipase, putative, expressed	13.1527	25.6307	14.6347	16.2373	16.5661	10.3537	7.32761	7.81116	6.93338	6.36032	6.64467	10.6088
LOC_Os01g52770	GDSL-like lipase/acylhydrolase, putative, expressed	11.7528	15.6334	8.04419	8.51351	7.30553	5.97491	6.59682	3.5918	5.92052	8.59186	10.3913	14.2964
LOC_Os01g54810	THIS1	11.5259	7.57812	10.1231	10.4933	12.4106	15.1295	14.3589	21.5551	13.988	15.0784	10.162	8.84396
LOC_Os01g58790	OsCMK|OsIspE	2.00003	2.97532	1.95388	2.62751	2.28514	2.62682	1.15531	0.963946	2.03647	1.71598	2.17615	2.43504
LOC_Os01g61200	GDSL-like lipase/acylhydrolase, putative, expressed	1.65969	1.44753	0.646694	0.498433	0.991469	0.722751	0.222948	0.193313	0.628297	0.271174	0.325663	0.50858
LOC_Os01g61570	GDSL-like lipase/acylhydrolase, putative, expressed	49.1782	35.495	43.8811	54.677	49.8773	40.3548	40.5279	19.9368	52.263	50.4614	68.3128	75.4426
LOC_Os01g63260	3-oxo-5-alpha-steroid 4-dehydrogenase, putative, expressed	3.39468	3.83662	4.44479	1.65789	1.64675	1.15062	2.89297	1.4769	3.02014	2.44303	2.90227	3.80122
LOC_Os01g64750	sterol 3-beta-glucosyltransferase, putative, expressed	5.87067	3.63965	5.12821	7.04627	8.13752	10.3677	6.06152	11.9498	7.71136	9.21763	6.05622	5.58203
LOC_Os01g65830	acyl-desaturase, chloroplast precursor, putative, expressed	0.483739	0.0506341	3.42207	0.317898	0.713622	0.470741	1.54573	2.5224	1.25439	1.68343	1.15084	0.96
LOC_Os01g67430	EG1|GY1	1.16329	0.896014	2.9511	3.3029	2.31297	1.16052	2.16495	2.29909	5.57754	4.23406	4.69359	3.10399
LOC_Os02g01140	GDSL-like lipase/acylhydrolase, putative, expressed	5.14915	6.59847	4.23139	6.58789	5.02754	3.44873	2.9865	2.04426	4.69754	4.76182	4.21032	4.8648
LOC_Os02g01760	diphosphomevalonate decarboxylase family protein, expressed	7.35694	10.9856	10.2045	6.35896	7.5145	9.24025	5.40609	4.35475	4.77105	5.25116	6.24686	5.7604
LOC_Os02g01980	GDSL-like lipase/acylhydrolase, putative, expressed	45.2833	3.82517	35.6056	0.555668	32.3782	23.3248	0.0252082	0.0480981	0.0224661	0.0114704	0.0128729	0.012393
LOC_Os02g08230	WAX2, putative, expressed	77.0565	115.07	60.6493	72.3633	64.4848	59.1635	9.01999	15.0522	39.7435	23.2162	13.1714	35.7463
LOC_Os02g09450	MTD1	0.367843	0	4.26032	1.66048	2.65876	4.6797	89.9837	73.1632	30.5232	31.9357	43.2292	26.7213
LOC_Os02g09610	GDSL-like lipase/acylhydrolase, putative, expressed	0.851377	1.25613	0.711301	0.742554	0.699438	0.56562	0.580142	0.288347	1.14368	0.797153	0.636312	1.19464
LOC_Os02g09620	GDSL-like lipase/acylhydrolase, putative, expressed	8.78156	11.915	8.90226	6.53145	6.33157	5.27793	6.77561	3.30145	7.668	6.80802	10.1982	11.211
LOC_Os02g11070	3-ketoacyl-CoA synthase, putative, expressed	1.25214	0.806307	1.21647	0.581993	0.774623	0.743554	0.63764	9.91109	0.733444	0.586854	0.851723	0.738367
LOC_Os02g15230	BS1	78.4996	106.152	59.5698	62.4836	59.7322	53.5315	27.1452	26.3346	36.3042	33.3985	29.279	45.6909
LOC_Os02g18990	GDSL-like lipase/acylhydrolase, putative, expressed	0	0.569747	0.0186275	0	0	0	0	0	0	0	0	0
LOC_Os02g26814	UDP-N-acetylglucosamine transferase subunit ALG13, putative, expressed	24.8088	15.2104	19.3801	33.9641	33.479	49.8767	35.9191	38.0875	29.9641	37.6087	29.1895	26.6341
LOC_Os02g28040	lipase, putative, expressed	11.5376	9.09781	9.17659	15.4947	14.2069	16.8587	15.3325	17.6765	16.7906	14.8059	12.3564	13.5588
LOC_Os02g30060	3-oxoacyl-reductase, chloroplast precursor, putative, expressed	1.78327	0.345693	1.04655	0.404123	0.813909	0.801215	0.112184	0.293835	0.138845	0.164214	0.145308	0.173169
LOC_Os02g30200	PE-PGRS family protein, putative, expressed	144.003	41.0516	159.254	86.9559	80.6272	62.8499	97.6754	75.4662	68.2395	52.7801	63.3411	132.518
LOC_Os02g31030	OsGDPD2	7.91847	19.1639	6.15763	10.9343	10.7688	12.8482	12.7557	9.34615	15.8293	10.8339	12.7037	15.1745
LOC_Os02g37050	phosphatidylinositolglycan class N family protein, expressed	5.91108	4.15985	4.87564	5.4485	6.14103	7.26996	5.7983	6.86348	5.26593	6.78722	5.25123	5.04284
LOC_Os02g37654	lecithin:cholesterol acyltransferase, putative, expressed	2.19322	2.12892	1.81818	1.18635	1.15113	1.10103	2.65531	1.41583	1.01553	1.15235	2.14149	2.47664
LOC_Os02g37770	lecithin cholesterol acyltransferase, putative, expressed	2.79783	5.0291	2.57868	3.86855	4.24716	2.6481	3.19097	0.570996	2.30918	1.95838	2.54091	4.27211
LOC_Os02g37780	lecithine cholesterol acyltransferase, putative, expressed	1.66516	6.11696	3.54509	2.4361	2.43898	2.00282	1.12188	0.430151	1.35176	1.60819	1.72432	3.4829
LOC_Os02g37800	lecithin:cholesterol acyltransferase, putative, expressed	26.4922	53.4299	38.5733	38.4422	27.4883	19.0758	21.4136	14.0952	29.7383	25.481	24.1449	34.2926
LOC_Os02g39590	GDSL-like lipase/acylhydrolase, putative, expressed	0.676504	0.0429241	1.03823	0.463189	0.685745	0.68757	1.43624	1.46745	0.974584	1.45929	0.831934	0.868799
LOC_Os02g40440	GDSL-like lipase/acylhydrolase, putative, expressed	128.669	177.912	125.847	75.3773	72.4496	70.3253	9.2748	7.52101	22.8016	22.7693	21.7912	61.5479
LOC_Os02g40784	OsCER1|OsGL1-4	673.198	230.916	628.344	1015.96	899.123	967.209	425.443	569.603	695.649	590.192	562.659	646.454
LOC_Os02g43700	triacylglycerol lipase like protein, putative, expressed	1.3328	2.6031	1.10497	1.11802	0.896022	0.633545	1.09639	3.03681	1.18519	1.7263	1.6101	2.7348
LOC_Os02g45660	OsIspF	6.92906	9.0845	10.3473	5.57841	6.08499	3.60154	5.57414	4.02049	8.02122	7.04619	8.88718	7.84872
LOC_Os02g48460	NAD dependent epimerase/dehydratase family protein, putative, expressed	8.33168	9.27585	6.84944	8.44071	7.90183	8.16264	2.82055	2.89317	6.43927	6.64132	7.29855	6.07122
LOC_Os02g49920	3-ketoacyl-CoA synthase, putative, expressed	3.7395	3.76081	10.3893	7.87321	5.58431	4.27432	17.6043	10.4408	25.2615	20.0539	44.0694	46.7851
LOC_Os02g50000	GDSL-like lipase/acylhydrolase, putative, expressed	0.436586	0.966343	0.551482	0.0545149	0.489392	0.234246	0.158194	0.112051	0.146109	0.148275	0.0439104	0.0384949
LOC_Os02g50690	GDSL-like lipase/acylhydrolase, putative, expressed	13.1581	22.3403	17.5569	20.5111	15.1517	11.3467	5.28917	3.25906	14.277	11.3043	12.0864	16.6732
LOC_Os02g55910	OsMGD|OsMGD2	6.75832	9.65917	5.95205	7.7299	6.24223	7.03302	16.5565	14.3761	9.79727	8.62861	11.5406	8.93937
LOC_Os02g56860	3-ketoacyl-CoA synthase, putative, expressed	1.59673	1.69689	0.869827	0.397153	0.703572	0.318858	0.77959	0.323641	0.411048	0.651643	0.685707	0.901315
LOC_Os02g56920	OsGL1-6	7.61997	12.783	3.78391	2.79417	5.08079	5.5879	1.15791	1.44078	2.25229	1.47311	1.19708	3.06972
LOC_Os02g57110	GDSL-like lipase/acylhydrolase, putative, expressed	6.32884	7.79598	3.03556	3.81488	3.61394	3.35207	4.85461	1.25325	2.79003	2.78177	5.70775	7.776
LOC_Os02g58500	phospholipase A2, putative, expressed	9.96228	7.97177	12.2467	7.43907	9.88925	9.38199	12.2118	15.179	11.0423	15.1593	12.0339	8.4063
LOC_Os03g01820	fatty acid hydroxylase, putative, expressed	4.04828	9.30739	3.558	3.29655	2.76649	2.06527	3.08906	0.818333	2.73701	2.40696	4.1562	6.33265
LOC_Os03g02740	phospholipase D, putative, expressed	3.37632	1.20513	6.83993	3.7993	5.34751	4.50498	19.1156	21.1739	11.1134	13.0707	13.2313	8.67517
LOC_Os03g03370	DSM2	5.27708	3.73543	9.31916	4.27741	5.68387	3.44638	20.7987	17.208	10.9525	14.0129	19.0651	12.2746
LOC_Os03g04340	Ossmt2-1	60.3344	85.021	77.0833	73.5255	60.6482	45.0383	33.4514	22.5336	65.0593	53.0131	65.8854	63.4928
LOC_Os03g08360	ONI1	321.692	423.221	296.156	306.613	238.656	183.404	111.002	82.1422	214.87	191.746	205.676	331.78
LOC_Os03g09250	OsINO1-1|OsINO1	157.509	158.412	76.9095	61.7843	85.8175	107.987	45.998	64.5309	37.6537	39.5627	42.5447	101.132
LOC_Os03g12030	WSL4|CUT1L	89.6853	97.1055	71.6499	77.3416	62.5403	54.0099	22.4764	24.9922	47.0984	38.316	43.4389	71.6007
LOC_Os03g13030	lecithin cholesterol acyltransferase, putative, expressed	2.75346	5.21476	3.16193	2.62113	2.18395	1.01904	1.20603	2.0833	2.33658	1.48411	0.94693	1.38551
LOC_Os03g14170	3-ketoacyl-CoA synthase, putative, expressed	14.7866	21.7843	18.8889	15.5974	13.7932	9.59138	18.9581	15.6099	17.8807	15.463	20.1937	26.9661
LOC_Os03g14950	OspPLAIIIalpha	2.05847	3.01804	3.33915	2.50841	2.82094	1.2965	2.14187	1.50373	4.37481	3.57633	3.92179	3.49485
LOC_Os03g18070	OsFAD7	55.268	35.4381	15.1541	23.7453	26.5307	37.3919	20.806	16.4644	15.981	16.1407	26.281	44.1481
LOC_Os03g18590	malonyl CoA-acyl carrier protein transacylase, mitochondrial precursor, putative, expressed	69.1174	51.3426	49.9876	53.6238	57.4354	63.3711	29.1609	30.8557	40.06	41.3126	38.5399	38.9285
LOC_Os03g19670	GDSL-like lipase/acylhydrolase, putative, expressed	5.39413	11.5888	6.83301	3.2319	4.1743	3.13977	3.87851	3.40638	3.49474	5.65461	7.11906	5.3364
LOC_Os03g24160	phosphatidylinositol-4-phosphate 5-kinase, putative, expressed	1.59986	2.64321	0.990103	1.32721	1.3232	1.43938	2.94029	2.47518	1.33951	1.30901	1.81292	1.67281
LOC_Os03g24170	phosphatidylinositol-4-phosphate 5-kinase, putative, expressed	2.17452	0.462641	3.69826	2.66639	3.45178	4.35896	29.4668	23.8335	10.9419	15.3101	15.3719	9.4525
LOC_Os03g25030	GDSL-like lipase/acylhydrolase, putative, expressed	1.23085	0.14593	3.6438	2.44396	2.99149	2.27034	10.2852	10.1743	6.16228	9.03229	11.0884	6.0569
LOC_Os03g25040	GDSL-like lipase/acylhydrolase, putative, expressed	0	0.0185882	0	0.0176068	0	0.0320266	4.05713	1.01265	0.591371	0.831981	1.95619	0.916601
LOC_Os03g27610	OsMATL	2.9903	0.0493384	11.3409	4.49828	8.47506	4.9121	47.7552	46.9839	18.1795	24.4354	31.038	23.0725
LOC_Os03g28140	1-phosphatidylinositol-4-phosphate 5-kinase/ zinc ion binding protein, putative, expressed	4.37898	4.35054	3.6361	5.94037	5.5471	6.75035	9.42677	8.09767	7.50098	7.8878	6.59306	6.06579
LOC_Os03g28420	3-oxoacyl-synthase, putative, expressed	366.739	176.827	281.831	450.303	426.132	489.746	310.154	323.015	373.032	332.579	280.157	311.895
LOC_Os03g30950	acyl-desaturase, chloroplast precursor, putative, expressed	1.7333	2.28249	1.33951	1.30701	1.60277	0.882125	2.90899	0.788774	1.37535	2.60515	2.93724	4.67892
LOC_Os03g38390	GDSL-like lipase/acylhydrolase, putative, expressed	0	0.0182706	0	0	0	0.018292	23.4669	8.13298	5.06359	1.93495	7.88859	4.73641
LOC_Os03g38470	GDSL-like lipase/acylhydrolase, putative, expressed	4.9109	7.80245	4.96136	3.30065	2.85839	2.85528	5.60894	3.05122	4.40782	4.00912	6.12655	8.22478
LOC_Os03g39860	acyl carrier protein, putative, expressed	25.9242	14.0008	23.5092	18.855	27.3672	31.7637	28.5724	26.8847	22.5409	33.2206	22.6944	17.8394
LOC_Os03g40670	glycerophosphoryl diester phosphodiesterase family protein, putative, expressed	4.87947	8.35159	4.10034	10.2318	9.2079	7.4546	1.96077	3.03165	5.48447	7.44687	6.03769	6.23565
LOC_Os03g43880	PLA IIIA/PLP7, putative, expressed	0.159136	0.196639	0.0162244	0.17658	0.0593668	0.0454529	0.422628	5.06684	0.999824	0.67924	0.726992	0.986926
LOC_Os03g47940	GDSL-like lipase/acylhydrolase, putative, expressed	12.0098	21.4644	10.4263	7.63359	10.0485	7.38734	14.4337	6.95043	10.6354	11.9173	13.4213	12.7201
LOC_Os03g50325	phosphatidylinositol 4-kinase, putative, expressed	7.40931	13.0708	9.88462	16.0329	16.1564	16.1688	13.5061	18.0652	21.4051	15.2342	9.96085	15.6637
LOC_Os03g52010	lecithin cholesterol acyltransferase, putative, expressed	1.15201	1.79677	0.995216	2.06314	1.43668	1.47726	1.61536	0.414787	1.13567	1.60161	2.11117	2.75239
LOC_Os03g59040	SQS	42.9277	27.3242	28.1201	41.9277	43.4611	51.1376	46.6465	46.4394	31.2132	43.7154	42.4318	35.44
LOC_Os03g59620	phospholipase, patatin family, putative, expressed	9.44555	9.5595	8.43397	14.5509	11.4913	11.6509	14.4234	10.342	19.117	13.7862	13.368	15.1149
LOC_Os03g60740	expressed protein	74.2231	40.3395	38.6543	54.8307	59.588	80.4868	59.5602	67.3841	44.0566	50.2163	45.3282	69.0591
LOC_Os03g62410	phospholipase D, putative, expressed	0.00735412	0.103496	0.0175858	0.0159265	0.0347439	0.0337394	1.6896	0.808721	0.302829	0.248829	0.848284	0.272354
LOC_Os03g62740	GDSL-like lipase/acylhydrolase, putative, expressed	116.837	180.697	106.715	72.7299	73.5766	65.1065	12.5305	13.0796	41.3939	31.7121	28.4261	76.1802
LOC_Os03g63930	acyl carrier protein, putative, expressed	15.444	14.4265	8.92585	10.4199	9.93649	10.1945	3.16173	1.99415	5.53897	6.04264	5.40787	7.04782
LOC_Os03g64170	GDSL-like lipase/acylhydrolase, putative, expressed	1.48095	2.55464	1.07865	0.973921	1.02086	0.721744	0.913806	0.510138	0.791406	0.842078	2.15539	2.24357
LOC_Os04g01510	DUF1295 domain containing protein, putative, expressed	8.35772	14.6416	14.3614	13.0105	9.65632	7.37705	5.36239	5.42906	15.0319	11.8161	9.09695	7.91135
LOC_Os04g21160	triacylglycerol lipase 1 precursor, putative, expressed	0.328864	0.0189978	0.961286	0.510074	0.421945	0.590952	0.732008	0.301511	1.51863	1.45088	1.97586	1.46973
LOC_Os04g35100	phospholipase C, putative, expressed	3.87421	3.60973	4.03258	2.33689	2.4923	2.45543	8.85215	7.0303	8.09271	4.91312	7.51717	8.37585
LOC_Os04g36800	3-oxoacyl-synthase, putative, expressed	108.401	38.7117	97.492	126.144	118.281	131.716	96.1114	78.3135	105.043	105.091	103.682	116.909
LOC_Os04g39610	glycerophosphoryl diester phosphodiesterase family protein, putative, expressed	2.91283	5.40799	2.80351	3.33511	2.54947	2.01895	1.04858	1.04183	3.48513	1.72058	1.4712	1.73505
LOC_Os04g42860	GDSL-like lipase/acylhydrolase, putative, expressed	6.31272	17.4872	4.36408	3.20053	4.68047	4.00712	3.43231	2.00831	3.10228	3.34162	4.43423	6.96793
LOC_Os04g43270	WAX2, putative, expressed	1.2725	0.376266	1.10026	1.40365	0.904582	1.24679	1.89043	1.41202	1.65401	1.17398	1.37563	1.55506
LOC_Os04g47390	GDSL-like lipase/acylhydrolase, putative, expressed	10.331	10.3218	12.7885	15.2828	14.7076	11.4724	9.28128	3.01196	8.70747	11.2158	20.6854	21.8231
LOC_Os04g48750	3-oxo-5-alpha-steroid 4-dehydrogenase, putative, expressed	12.3855	7.88331	7.93017	10.2842	10.5994	12.491	16.3205	14.9154	10.2076	7.70152	8.52787	14.1504
LOC_Os04g48800	GDSL-like lipase/acylhydrolase, putative, expressed	92.847	72.8747	101.098	121.696	92.3398	96.3967	45.8698	23.54	90.4201	86.6155	124.959	109.681
LOC_Os04g55660	GDSL-like lipase/acylhydrolase, putative, expressed	793.817	414.628	795.799	390.418	517.797	541.831	310.637	340.735	194.585	305.602	251.187	240.626
LOC_Os04g56210	OsFPPS3	5.37407	2.7632	6.28611	6.10065	6.18321	9.20864	17.2427	9.92215	18.3026	18.4278	23.8318	30.1223
LOC_Os04g59310	phospholipase C, putative, expressed	0.714258	0.487904	4.66549	1.3414	2.81375	2.77113	42.8682	40.0563	15.319	17.6935	26.2268	16.4679
LOC_Os04g59540	phosphatidylinositol-4-phosphate 5-Kinase, putative, expressed	0.175306	0.371662	0.12237	0.189002	0.162689	0.221701	0.0997574	0.0567898	0.144655	0.0664187	0.111341	0.148229
LOC_Os05g01970	NAD dependent epimerase/dehydratase family protein, putative, expressed	8.06682	11.4177	8.38558	9.64928	8.51557	6.6386	4.58724	3.25963	8.14303	6.39613	5.70723	5.13858
LOC_Os05g03610	OsPLC4	1.34707	4.42442	3.08988	3.23392	2.52842	1.81569	2.24834	1.514	2.93452	3.40451	3.76142	3.62776
LOC_Os05g04630	OsAP1	107.096	189.858	148.685	221.416	169.032	162.597	63.9274	62.791	161.993	127.749	134.621	142.91
LOC_Os05g06720	DARX1	66.6299	71.7371	52.46	62.3311	62.7714	60.8421	19.4503	21.5609	38.5847	33.618	23.5709	34.9823
LOC_Os05g07880	phospholipase D, putative, expressed	0.303938	0.528524	4.47681	0.720714	1.62075	1.72505	62.0703	55.0063	21.328	18.6512	25.7727	23.068
LOC_Os05g11910	GDSL-like lipase/acylhydrolase, putative, expressed	140.713	212.724	152.651	129.866	117.484	117.595	31.0845	17.782	98.3549	67.9317	64.7178	112.631
LOC_Os05g11950	GDSL-like lipase/acylhydrolase, putative, expressed	95.2205	132.023	125.21	104.112	80.8478	62.0496	78.0097	35.7621	100.758	75.4094	109.008	129.005
LOC_Os05g31290	acyl carrier protein, putative, expressed	29.6789	17.4407	33.2974	25.6179	37.8638	31.9077	45.7913	64.3477	40.5573	65.535	43.6095	25.5775
LOC_Os05g32380	phospholipase, putative, expressed	0.284291	0.612989	0.373883	0.308008	0.21249	0.0649577	0.755166	0.455585	0.605678	0.562572	0.469679	0.739876
LOC_Os05g33270	GDSL-like lipase/acylhydrolase, putative, expressed	61.1841	68.1341	33.0564	66.7225	66.0397	59.0373	10.191	12.3069	22.5078	23.8727	16.0619	27.4629
LOC_Os05g33840	CLA1|OsDXS1|OsDXS2	17.5612	26.489	10.2618	5.52615	8.48772	9.32815	8.51636	3.42674	5.37524	4.51269	7.81284	19.2657
LOC_Os05g34180	hydrolase, NUDIX family, domain containing protein, expressed	49.6857	21.4362	44.0641	57.031	56.751	58.321	47.014	44.2203	38.322	43.7134	37.843	36.1708
LOC_Os05g34700	GDSL-like lipase/acylhydrolase, putative, expressed	16.9188	37.4936	16.0482	13.738	20.8486	15.6069	13.0361	7.74895	11.5598	12.3299	18.2246	12.9408
LOC_Os05g39220	GDSL-like lipase/acylhydrolase, putative, expressed	5.95254	14.3722	4.28846	3.40008	5.17445	3.87786	0.160677	0.157142	0.110876	0.26837	0.0598003	0.188818
LOC_Os05g44200	GDSL-like lipase/acylhydrolase, putative, expressed	4.71272	5.09392	2.69266	1.92737	2.27548	1.70679	3.42634	2.17695	3.4665	3.75363	4.88278	6.11514
LOC_Os05g45820	heavy metal-associated domain containing protein, expressed	0.6884	0.974021	0.354209	0.644466	0.412227	0.917943	0.419937	0.0972736	0.378711	0.219152	0.360247	0.402134
LOC_Os05g47545	expressed protein	58.6563	37.473	52.4567	59.858	62.8119	76.982	74.8873	78.4419	69.721	87.0717	72.9349	71.5042
LOC_Os05g49830	lipase class 3 family protein, putative, expressed	441.26	374.476	643.091	687.651	545.176	452.565	419.645	515.859	1206.91	860.42	1062.12	1153.49
LOC_Os05g49840	phospholipase, putative, expressed	1.01977	0.364203	2.48416	2.52637	1.96058	1.92581	4.72295	2.71602	3.0973	4.0159	6.0057	5.83867
LOC_Os05g49900	OsCHS	35.8529	13.6606	37.2481	31.7099	30.113	25.5637	36.8912	28.3301	30.4524	23.2912	26.8793	33.1034
LOC_Os06g05550	GDSL-like lipase/acylhydrolase, putative, expressed	388.994	500.216	397.509	416.844	339.196	342.291	87.4102	69.8685	217.461	193.696	231.731	286.663
LOC_Os06g05630	GDSL-like lipase/acylhydrolase, putative, expressed	0.170044	0.70628	0.475543	0.265261	0.204638	0.210912	0.0265778	0.023091	0.10659	0.074516	0.145048	0.232646
LOC_Os06g06230	GDSL-like lipase/acylhydrolase, putative, expressed	1.90699	0	2.23926	0.642096	2.62227	2.734	1.40803	1.56455	1.04772	1.70331	0.822832	0.58737
LOC_Os06g06250	GDSL-like lipase/acylhydrolase, putative, expressed	329.093	569.554	297.083	271.634	249.728	187.62	49.0303	30.7674	107.585	92.3103	111.301	190.301
LOC_Os06g06290	GDSL-like lipase/acylhydrolase, putative, expressed	79.3194	118.001	57.6039	74.5382	57.7419	59.0555	45.853	18.7185	40.4407	43.5447	79.9555	103.659
LOC_Os06g06520	GDSL-like lipase/acylhydrolase, putative, expressed	3.42583	2.87524	3.11274	5.25251	4.14336	3.91615	4.78822	7.81385	3.85589	4.2452	3.68096	3.56127
LOC_Os06g12250	DSH1	3.25071	4.44979	2.17316	1.69986	2.08633	2.30894	1.58398	1.28186	1.72445	1.63923	2.52653	2.25906
LOC_Os06g12410	GDSL-like lipase/acylhydrolase, putative, expressed	0.103061	0.612906	0.18455	0.0406398	0.171152	0.0584394	0	0.0412088	0.036665	0.0190154	0	0.0194946
LOC_Os06g14490	calmodulin-binding heat-shock protein, putative, expressed	4.52772	5.42413	3.87755	4.43212	4.48282	4.90559	1.56388	6.04594	3.10209	3.14616	3.04159	3.08859
LOC_Os06g14630	GDSL-like lipase/acylhydrolase, putative, expressed	0.282245	0.569003	0.197708	0.0127354	0.16678	0.127003	0	0.0150513	0.0165974	0	0	0.0336987
LOC_Os06g14810	3-ketoacyl-CoA synthase, putative, expressed	110.07	147.352	121.651	99.2717	72.0871	57.5988	18.489	9.16043	42.0186	40.5261	52.5399	111.348
LOC_Os06g15170	3-ketoacyl-CoA synthase, putative, expressed	1.67513	5.40876	2.69959	3.08934	3.19681	2.15037	0.800727	0.899405	1.33981	1.10985	2.15797	2.61191
LOC_Os06g24404	GDSL-like lipase/acylhydrolase, putative, expressed	25.82	39.9989	22.1794	22.9792	22.8641	28.915	2.85066	5.49771	24.7639	13.595	7.62132	10.295
LOC_Os06g34070	GDSL-like lipase/acylhydrolase, putative, expressed	5.82047	6.4669	4.40353	5.11918	4.94668	4.72487	1.92187	2.10291	3.47684	2.62202	3.0107	3.84293
LOC_Os06g34120	GDSL-like lipase/acylhydrolase, putative, expressed	85.9469	135.45	49.1722	54.8262	56.5025	50.4502	13.338	10.1824	19.7283	18.1725	18.0339	35.025
LOC_Os06g40170	OsPLDalpha4	3.04211	5.84857	3.15223	3.37144	3.25693	2.06055	3.1738	2.44847	3.75634	3.8175	3.79085	3.91753
LOC_Os06g40180	OsPLDalpha5	0.294746	0.591774	0.487075	0.23813	0.289788	0.164249	0.253058	0.136912	0.285585	0.301483	0.249776	0.242699
LOC_Os06g42860	triacylglycerol lipase precursor, putative, expressed	838.482	68.8467	689.686	736.043	571.583	698.743	637.941	498.808	747.893	549.126	525.288	682.102
LOC_Os06g43044	GDSL-like lipase/acylhydrolase, putative, expressed	216.968	80.6517	213.998	125.531	132.365	149.024	46.8789	36.5376	49.1759	46.5479	44.9924	64.6332
LOC_Os06g44300	OsGL1-3	192.023	299.348	173.187	182.731	151.098	148.113	63.3491	42.1967	115.992	84.9346	107.641	170.85
LOC_Os06g46350	DEP3	2.58768	3.03604	4.21656	7.141	4.52621	2.27697	3.72571	3.29361	6.66225	5.46997	7.43145	6.4801
LOC_Os06g47910	GDSL-like lipase/acylhydrolase, putative, expressed	7.21206	4.11954	3.54806	6.44601	5.7654	7.18061	5.35024	8.95795	3.31807	2.64418	2.83227	3.21512
LOC_Os07g01150	fatty acid hydroxylase, putative, expressed	27.0778	23.2985	32.2374	24.9996	30.9932	32.1788	63.184	60.5754	38.2384	46.1735	50.5757	35.3952
LOC_Os07g01200	tetraacyldisaccharide 4-kinase, putative, expressed	4.62865	4.45913	6.06482	3.72496	5.62004	4.64576	10.0873	10.4419	7.37168	8.85359	7.09284	5.22714
LOC_Os07g05110	PLA IIIA/PLP7, putative, expressed	4.91617	7.86693	3.46952	4.81661	5.64793	3.16487	2.36641	2.77934	2.19633	2.76729	1.53502	2.88168
LOC_Os07g06800	3-oxo-5-alpha-steroid 4-dehydrogenase, putative, expressed	0.507798	0.0320502	0.921429	0.294997	0.653832	0.603701	6.88653	6.53384	2.60161	3.48596	5.48243	2.35986
LOC_Os07g09190	OsDXS|OsDXS3	12.8628	12.0516	19.4263	29.9456	22.5509	16.674	14.9406	11.1811	29.8111	27.0236	29.5533	36.9709
LOC_Os07g12150	acyl carrier protein, putative, expressed	67.4365	42.7773	62.5385	63.2719	72.4016	68.7587	93.4609	99.0323	80.5741	95.1163	76.6092	66.6871
LOC_Os07g15680	phospholipase D, putative, expressed	1.24255	1.26177	1.35378	1.13868	1.46278	1.78638	12.0984	8.76508	4.76333	5.14868	5.6803	3.64123
LOC_Os07g39270	OsGGPPS1	15.4639	7.16999	13.0976	10.8573	14.0196	14.2911	17.3769	16.0938	10.6427	14.8823	16.8802	13.7707
LOC_Os07g39750	AChE	9.44309	12.5886	5.96484	6.07486	7.33815	5.80909	3.3695	3.27661	5.04698	4.29166	3.91316	4.91868
LOC_Os07g41150	glycerophosphoryl diester phosphodiesterase family protein, putative, expressed	55.9117	7.19622	67.4416	30.1406	50.0639	58.5193	41.1286	63.2772	30.1053	52.0003	38.7951	28.2602
LOC_Os07g42420	3-oxoacyl-synthase, putative, expressed	27.5941	56.6823	35.7794	29.3048	31.198	22.722	20.7452	18.1634	27.232	26.6926	25.4411	25.9996
LOC_Os07g44780	GDSL-like lipase/acylhydrolase, putative, expressed	0.317817	0.810736	1.15752	0.740388	0.442722	0.222804	0.336081	0.217162	1.11258	0.911744	0.963105	1.63279
LOC_Os07g47210	GDSL-like lipase/acylhydrolase, putative, expressed	0.395599	1.37356	0.544159	0.410543	0.41231	0.306144	0.0752118	0.0590068	0.137852	0.167449	0.120939	0.1582
LOC_Os07g47250	lipase precursor, putative, expressed	4.54509	3.64333	3.34262	4.25053	4.05543	6.11342	7.65532	7.38911	6.76046	5.48676	5.55775	5.55707
LOC_Os07g49310	OsFAD8	3.84402	5.01424	2.78317	2.02287	2.129	1.99558	1.41303	0.520675	1.18007	1.35026	1.92004	3.19829
LOC_Os07g49330	OsPLC1	38.07	59.5996	46.9441	47.703	39.6515	34.8337	19.8727	14.257	36.5334	28.1578	27.6783	34.4221
LOC_Os08g01310	phospholipase C, putative, expressed	16.0301	18.9962	10.776	12.6176	12.3428	10.7176	5.61097	5.77107	6.24609	8.07981	5.32115	8.53581
LOC_Os08g02094	GDSL-like lipase/acylhydrolase, putative, expressed	28.6068	40.4273	27.8646	25.0653	24.9782	16.968	26.143	19.3625	22.7181	31.0582	34.0279	43.1886
LOC_Os08g04800	triacylglycerol lipase like protein, putative, expressed	0.0114987	0.0732569	0	0.0145009	0	0	0.014724	0.456532	0	0.01357	0	0.0275225
LOC_Os08g05870	oxysterol-binding protein-related protein 6, putative, expressed	12.6439	11.2479	11.3548	13.5875	14.9546	16.992	26.8076	20.306	20.0096	18.017	17.772	16.4102
LOC_Os08g09950	acyl-desaturase, chloroplast precursor, putative, expressed	4.32601	9.23709	3.57736	6.06727	4.14143	3.98419	3.83554	1.38082	2.92178	6.67691	8.64701	11.2176
LOC_Os08g14490	dehydrogenase-phosphopantetheinyltransferase, putative, expressed	18.9576	19.5277	10.7447	14.4851	14.8069	16.9045	8.31557	8.195	8.37172	9.05219	7.62514	9.08268
LOC_Os08g39350	glycerophosphoryl diester phosphodiesterase family protein, putative, expressed	30.1178	14.7154	22.611	44.1342	39.7645	46.7544	52.0206	42.9916	59.6394	46.9265	43.9918	54.3793
LOC_Os08g40180	3-hydroxy-3-methylglutaryl-coenzyme A reductase, putative, expressed	23.8906	20.9404	22.9663	12.9685	17.6411	16.5132	61.5984	54.0945	30.5735	33.9043	37.3579	31.3133
LOC_Os08g40590	oxysterol-binding protein, putative, expressed	5.81156	6.4518	8.15146	8.53419	6.63572	6.96535	32.4369	21.762	20.5029	15.5768	20.9766	19.48
LOC_Os08g41780	triacylglycerol lipase precursor, putative, expressed	23.0379	26.7747	28.2461	34.332	25.8135	24.8782	8.70522	6.27275	14.0542	15.0009	18.117	22.434
LOC_Os08g43170	hydroxymethylglutaryl-CoA synthase, putative, expressed	31.2181	19.4236	43.0992	30.151	37.474	42.8547	58.9346	56.4875	37.4326	46.2798	49.8607	37.7051
LOC_Os08g45150	GDSL-like lipase/acylhydrolase, putative, expressed	956.845	2086.19	1013.2	729.015	590.194	436.084	109.744	117.116	357.434	240.85	233.544	631.392
LOC_Os09g02729	phospholipase C, putative, expressed	14.4527	12.8931	8.77594	13.6421	14.0182	15.5439	6.30136	8.39598	10.6248	10.4451	9.41242	12.0378
LOC_Os09g04624	GDSL-like lipase/acylhydrolase, putative, expressed	5.83002	12.0882	7.35565	6.1232	5.86044	3.65335	1.53338	1.7792	2.87249	2.96619	2.04638	3.2945
LOC_Os09g04710	GDSL-like lipase/acylhydrolase, putative, expressed	10.901	24.208	7.17537	4.7299	6.80289	4.9704	1.25026	1.29775	2.70688	2.1373	2.05396	5.441
LOC_Os09g07290	GDSL-like lipase/acylhydrolase, putative, expressed	2.09991	4.40902	1.07167	0.934635	1.82882	1.58299	0.107808	0.0796892	0.284747	0.179228	0.0894983	0.2415
LOC_Os09g17000	glycerophosphoryl diester phosphodiesterase family protein, putative, expressed	0.864471	1.61091	0.926643	1.20039	0.47978	0.765148	1.1174	0.470048	0.791076	1.5597	1.65668	1.78576
LOC_Os09g19650	3-ketoacyl-CoA synthase precursor, putative, expressed	1.21072	6.99143	2.1442	1.33422	1.77727	0.775545	0.242139	0.230019	0.697218	0.518033	0.512549	1.78175
LOC_Os09g25390	phospholipase D, putative, expressed	20.9856	28.0123	61.1415	55.2732	32.629	26.1625	97.3394	80.0478	140.63	102.784	136.912	192.503
LOC_Os09g25850	OsGL1-1|WSL2	107.611	50.0563	128.856	121.71	93.5899	74.6829	127.607	94.1488	138.501	99.4826	151.364	192.183
LOC_Os09g34090	sterol-4-alpha-carboxylate 3-dehydrogenase, decarboxylating, putative, expressed	15.8824	16.5326	9.71838	14.5299	14.1358	14.58	6.17413	5.30922	9.09928	8.7266	7.31413	8.76268
LOC_Os09g34930	3-ketoacyl-CoA synthase precursor, putative, expressed	0.862125	1.70686	0.846718	0.994677	0.651022	0.905071	1.44817	0.992868	0.660164	1.29442	2.0976	3.01965
LOC_Os09g36520	ki1 protein, putative, expressed	4.70048	10.1221	6.24547	6.24209	6.07055	4.80606	5.23607	9.49652	9.98474	7.29651	5.94939	8.74891
LOC_Os09g36860	acyl carrier protein, putative, expressed	290.505	154.755	163.947	178.876	228.889	271.373	115.858	112.885	107.324	138.979	120.543	112.64
LOC_Os09g37100	phospholipase D, putative, expressed	11.0611	5.77899	7.5611	10.5719	10.0958	11.2938	14.2777	9.74868	8.55306	9.17956	11.1641	12.8104
LOC_Os09g39430	GDSL-like lipase/acylhydrolase, putative, expressed	76.7404	79.249	59.6479	69.1417	58.4857	46.568	20.5632	15.4317	38.8994	40.5468	40.6419	69.6585
LOC_Os09g39580	calmodulin-binding heat-shock protein, putative, expressed	1.65433	1.92586	2.62283	1.38254	1.86671	1.72114	3.00213	4.31722	2.89942	3.27667	2.75335	2.33576
LOC_Os10g05088	GDSL-like lipase/acylhydrolase, putative, expressed	19.9724	0.0400493	46.3101	20.9506	34.2026	25.4127	71.5948	105.673	50.2384	79.4268	78.0688	44.5684
LOC_Os10g07010	3-ketoacyl-CoA synthase, putative, expressed	4.0238	3.66195	12.0713	10.8461	7.71748	4.57642	13.5935	10.4205	24.286	19.5286	18.8181	27.4972
LOC_Os10g22450	OsINO1-2	54.4074	5.35386	115.909	50.3387	81.0474	66.8643	358.457	375.273	166.367	208.248	244.104	144.096
LOC_Os10g25340	GDSL-like lipase/acylhydrolase, putative, expressed	19.7912	61.8209	39.3313	19.6026	16.1981	9.81455	3.06795	1.20284	6.98957	7.9989	12.1604	14.2901
LOC_Os10g25400	GDSL-like lipase/acylhydrolase, putative, expressed	1.36208	0.369382	3.48911	0.958415	1.78675	0.9329	3.52918	3.50258	2.42363	2.87905	4.37448	2.44533
LOC_Os10g28060	ONI2	69.2562	205.532	57.0776	53.4267	53.7147	42.4872	12.2625	10.6323	16.9434	18.0786	17.3695	39.1928
LOC_Os10g32580	GDSL-like lipase/acylhydrolase, putative, expressed	3.6034	5.54521	1.59792	1.14162	1.53545	0.887875	0.435707	0.371343	0.407032	0.497584	0.115767	0.619217
LOC_Os10g33250	WDA1	377.404	619.967	352.022	511.217	394.807	468.05	130.191	116.23	343.671	277.167	278.596	350.946
LOC_Os10g33370	3-ketoacyl-CoA synthase precursor, putative, expressed	55.0024	69.6614	37.9766	49.9618	45.6218	44.8519	9.20765	8.10547	23.9452	18.7935	14.3722	38.5244
LOC_Os10g38940	fatty acid hydroxylase, putative, expressed	9.18326	9.92129	8.8954	3.51405	4.49247	5.23374	16.7516	17.7284	8.48168	10.4257	12.1106	11.2995
LOC_Os10g40590	oxysterol-binding protein, putative, expressed	16.0416	15.82	16.9425	18.2428	17.9171	17.9234	27.376	26.574	20.9592	21.5362	22.2375	19.0343
LOC_Os11g01875	lipase-related, putative, expressed	2.00649	1.97726	2.13091	2.30426	2.41996	2.77427	2.41389	3.21295	2.29951	2.22444	2.37141	2.29292
LOC_Os11g04840	phosphatidylinositol-4-phosphate 5-kinase, putative, expressed	0.131716	0.018863	0.499047	0.272999	0.395567	0.599115	8.87535	10.3207	3.59028	4.50759	3.53761	2.98347
LOC_Os11g09010	PAD4|OsPAD4	7.30776	13.9514	11.3495	9.66057	7.40025	7.2751	8.5259	32.891	10.7814	8.28311	8.20158	7.33026
LOC_Os11g19340	lipase, putative, expressed	0	0	0	0	0	0	0	0.40842	0	0	0	0
LOC_Os11g31900	acyl carrier protein, putative, expressed	35.0643	35.1383	11.3348	10.1061	14.8173	17.0864	15.618	5.29646	7.71868	7.88123	13.9486	28.5767
LOC_Os11g31940	GDSL-like lipase/acylhydrolase, putative, expressed	1.72701	2.8302	1.69223	2.08222	1.73718	1.61594	0.860219	0.353121	0.915264	1.03764	1.42121	1.24586
LOC_Os11g37900	3-ketoacyl-CoA synthase, putative, expressed	5.22349	7.77955	4.74381	5.96941	4.15847	3.58722	1.99874	2.88891	4.99891	3.05538	2.67457	5.2854
LOC_Os11g39220	OsACX2	28.8187	52.3181	23.9747	39.3108	35.3933	31.698	11.3919	11.4332	25.6805	24.8894	24.4047	29.3583
LOC_Os11g43760	lipase class 3 family protein, putative, expressed	2.67606	1.8806	4.34963	3.86405	3.91311	4.89179	5.45541	5.03891	5.30409	6.40617	7.36851	5.85929
LOC_Os11g48070	WDL1	213.177	235.665	157.228	190.655	160.063	181.371	29.5664	21.7551	60.6985	62.1314	51.9505	97.2921
LOC_Os12g04700	phosphatidylinositol-4-phosphate 5-kinase, putative, expressed	0.0129611	0.00816467	0.147272	0.111036	0.17581	0.31138	6.38413	8.50886	2.19029	2.63607	2.81895	2.16511
LOC_Os12g13930	KAR	94.4497	79.0341	58.6256	51.4661	82.8993	82.7474	3.87021	3.90038	2.35078	2.2656	0.137684	3.32112
LOC_Os12g17320	polyprenyl synthetase, putative, expressed	7.08824	6.52457	3.10812	3.04914	3.17192	4.08338	4.09599	1.627	2.65228	2.03947	2.60885	3.58797
LOC_Os12g17570	GDSL-like lipase/acylhydrolase, putative, expressed	0.282728	0.382214	0.0680858	0.159706	0.0927877	0.150032	0.014346	0.0119772	0.0623521	0.0125457	0	0.106089
LOC_Os12g34890	acyl carrier protein, putative, expressed	18.9885	18.3147	11.1946	16.6066	17.0635	17.7265	10.3102	4.68336	13.87	11.6264	13.1341	13.0821
LOC_Os12g37910	GDSL-like lipase/acylhydrolase, putative, expressed	40.5319	62.6909	41.3183	36.6837	29.3254	23.6691	21.2386	13.5872	29.641	25.4545	32.2212	37.2036

## Sheet: rhythm
	SD8	SD12	SD16	SD20	SD24	SD4	LD8	LD12	LD16	LD20	LD24	LD4
OsPRR73(LOC_Os03g17570)	32.0892	92.6179	71.4832	59.6962	13.4281	14.2308	59.9022	79.268	73.6743	32.425	7.94652	6.53125
OsPRR95(LOC_Os09g36220)	22.3397	115.061	44.5932	9.21125	8.23453	9.78268	15.8265	22.9407	32.3145	6.36092	6.0427	6.66351
OsELF3(LOC_Os06g05060)	13.1369	15.0938	10.9044	17.9285	17.6817	17.6837	13.276	12.4703	16.0427	13.2083	12.2536	13.9602
OsFKF1(LOC_Os11g34460)	1.93247	13.0808	17.7809	6.31287	2.50728	1.04488	0.516221	14.1323	30.942	6.08009	0.612343	0.301534
OsCCA1/OsLHY(LOC_Os08g06110)	232.23	166.502	14.2894	10.2908	22.7472	163.031	247.951	24.074	4.13017	5.81236	36.5886	302.488
OsGI(LOC_Os01g08700)	27.0127	122.704	154.652	182.716	40.1445	20.5424	32.4327	121.663	234.704	100.608	15.6471	6.77758
OsPRR37(LOC_Os07g49460)	27.5025	35.9137	39.3839	41.5916	15.2906	16.1346	19.5766	27.5442	28.8933	17.2749	3.61525	4.0723
OsZTL1(LOC_Os02g05700)	26.9915	25.1679	23.2708	33.9888	31.9715	35.1652	33.9476	32.9873	34.9844	37.317	30.4043	28.2463
OsLUX(LOC_Os01g74020)	0.579638	0.656314	7.9978	8.85623	3.41012	0.818239	0.535333	1.29053	22.1554	8.85127	2.92127	0.605928
OsTOC1/OsPRR1(LOC_Os02g40510)	10.0257	18.3843	19.6072	20.0673	15.4455	11.9355	3.80305	14.1777	27.8072	16.453	8.4717	5.29196
OsZTL2(LOC_Os06g47890)	41.7708	44.426	40.2209	45.3475	42.5156	40.4088	53.044	37.4981	43.6856	44.6274	47.1264	44.5834
OsCAB1R(LOC_Os09g17740)	356.051	523.631	251.466	9.53922	3.74056	12.942	327.626	158.706	110.107	2.03916	1.73849	31.0236
