# Supplementary material for: Transcriptome Analysis Reveals Photoperiod-Associated Genes Expressed in Rice Anthers
Source: Front Plant Sci. 2021 Feb 26;12:621561. doi: 10.3389/fpls.2021.621561 (PMC7953911; doi:10.3389/fpls.2021.621561)
Supplement: Supplementary file 8 [file Data_Sheet_6.XLSX]

## Sheet: All gene of turquoise
GeneID	module	geneModuleMembership	kTotal	kWithin	kOut	kDiff	KME	GS
LOC_Os07g05830	turquoise	0.626955	325.454	217.351	108.103	109.248	0.626955	0.58509	zinc-finger protein, putative, expressed
LOC_Os01g18070	turquoise	0.906086	1351.27	735.56	615.713	119.847	0.906086	0.802187	bacterial transferase hexapeptide domain containing protein, expressed
LOC_Os10g05190	turquoise	0.534237	55.8522	27.7852	28.0669	-0.281659	0.534237	0.366132	transposon protein, putative, CACTA, En/Spm sub-class, expressed
LOC_Os03g25930	turquoise	0.906594	1454.38	725.245	729.131	-3.88638	0.906594	0.617526	emp24/gp25L/p24 family protein, putative, expressed
LOC_Os03g39129	turquoise	0.870243	940.873	551.225	389.648	161.577	0.870243	0.589214	frigida, putative, expressed
LOC_Os08g22690	turquoise	0.78212	730.685	370.597	360.089	10.508	0.78212	0.460774	retrotransposon, putative, centromere-specific, expressed
LOC_Os10g28600	turquoise	0.315842	107.915	18.4298	89.485	-71.0552	0.315842	0.191494	PPR repeat domain containing protein, putative, expressed
LOC_Os01g25520	turquoise	0.397832	22.2745	9.10664	13.1679	-4.06123	0.397832	0.461353	ferredoxin-nitrite reductase, putative, expressed
LOC_Os03g05450	turquoise	0.885822	1280.97	647.206	633.762	13.4438	0.885822	0.608943	expressed protein
LOC_Os02g56090	turquoise	0.451914	31.2663	13.405	17.8612	-4.45616	0.451914	0.3553	expressed protein
LOC_Os03g25960	turquoise	0.819813	896.534	410.208	486.326	-76.1174	0.819813	0.704492	RNA recognition motif containing protein, putative, expressed
LOC_Os06g35300	turquoise	0.881256	1001.62	735.666	265.954	469.712	0.881256	0.717963	polygalacturonase, putative, expressed
LOC_Os10g35240	turquoise	0.593669	174.73	106.119	68.6104	37.509	0.593669	0.437275	Rf1, mitochondrial precursor, putative, expressed
LOC_Os12g41460	turquoise	0.623786	120.533	98.0071	22.5262	75.4809	0.623786	0.3621	expressed protein
LOC_Os06g23790	turquoise	0.877094	1293.53	709.547	583.981	125.565	0.877094	0.84421	expressed protein
LOC_Os10g35230	turquoise	0.752342	437.16	243.584	193.576	50.0083	0.752342	0.499908	Rf1, mitochondrial precursor, putative, expressed
LOC_Os12g41450	turquoise	0.735733	276.395	219.872	56.5233	163.348	0.735733	0.498471	F-box domain containing protein, expressed
LOC_Os11g02810	turquoise	0.229286	20.8964	4.45538	16.441	-11.9857	0.229286	0.0551446	expressed protein
LOC_Os05g31744	turquoise	0.700974	687.025	217.359	469.666	-252.307	0.700974	0.702933	expressed protein
LOC_Os06g43700	turquoise	0.968346	1664.41	1144.8	519.607	625.197	0.968346	0.792333	transmembrane amino acid transporter protein, putative, expressed
LOC_Os01g18000	turquoise	0.706506	214.936	142.35	72.5862	69.7633	0.706506	0.598175	retrotransposon protein, putative, Ty3-gypsy subclass, expressed
LOC_Os06g08720	turquoise	0.780495	756.096	300.679	455.416	-154.737	0.780495	0.411373	OsSCP32 - Putative Serine Carboxypeptidase homologue, expressed
LOC_Os05g31720	turquoise	0.908714	1158.4	732.552	425.852	306.7	0.908714	0.610247	stromal membrane-associated protein, putative, expressed
LOC_Os06g23740	turquoise	0.201704	38.2725	6.20027	32.0722	-25.8719	0.201704	0.0488594	expressed protein
LOC_Os04g42090	turquoise	0.741308	620.228	311.529	308.699	2.83058	0.741308	0.62626	CPuORF7 - conserved peptide uORF-containing transcript, expressed
LOC_Os04g42095	turquoise	0.780638	537.245	300.642	236.603	64.0384	0.780638	0.667676	S-adenosyl-l-methionine decarboxylase leader peptide, putative, expressed
LOC_Os06g23770	turquoise	0.748769	271.905	208.288	63.6168	144.672	0.748769	0.474592	expressed protein
LOC_Os02g38920	turquoise	0.853897	1218.81	519.089	699.722	-180.632	0.853897	0.557381	glyceraldehyde-3-phosphate dehydrogenase, putative, expressed
LOC_Os10g35190	turquoise	0.686982	300.557	136.475	164.082	-27.6063	0.686982	0.421074	ZOS10-06 - C2H2 zinc finger protein, expressed
LOC_Os04g51440	turquoise	0.984224	1737.95	1202.43	535.524	666.904	0.984224	0.776705	villin protein, putative, expressed
LOC_Os06g35370	turquoise	0.905497	1236.76	941.847	294.914	646.933	0.905497	0.705751	polygalacturonase, putative, expressed
LOC_Os01g13870	turquoise	0.456165	47.1037	19.4315	27.6722	-8.24075	0.456165	0.121534	expressed protein
LOC_Os02g15700	turquoise	0.588865	139.002	72.9616	66.0408	6.92086	0.588865	0.587979	expressed protein
LOC_Os08g44660	turquoise	0.951453	1653.09	989.187	663.903	325.284	0.951453	0.813384	EF hand family protein, putative, expressed
LOC_Os10g35150	turquoise	0.796956	806.084	362.211	443.873	-81.6628	0.796956	0.443458	expressed protein
LOC_Os03g17084	turquoise	0.402991	60.6542	19.4675	41.1866	-21.7191	0.402991	0.548876	Core histone H2A/H2B/H3/H4 domain containing protein, putative, expressed
LOC_Os08g44650	turquoise	0.904355	1097.95	700.034	397.913	302.121	0.904355	0.674447	expressed protein
LOC_Os03g41920	turquoise	0.624591	126.977	65.7968	61.1797	4.61703	0.624591	0.430478	expressed protein
LOC_Os12g02420	turquoise	0.572607	193.735	96.9167	96.8181	0.0986827	0.572607	0.677957	WRKY97, expressed
LOC_Os04g44840	turquoise	0.745903	653.681	262.125	391.556	-129.432	0.745903	0.348904	glycosyl hydrolase family 3 protein, putative, expressed
LOC_Os06g43650	turquoise	0.823701	865.56	388.574	476.986	-88.4126	0.823701	0.721124	secreted salivary protein, putative, expressed
LOC_Os06g35320	turquoise	0.840986	923.781	686.358	237.423	448.935	0.840986	0.635499	polygalacturonase, putative, expressed
LOC_Os01g64370	turquoise	0.959832	1547.05	1022.96	524.092	498.863	0.959832	0.755978	expressed protein
LOC_Os08g44620	turquoise	0.598946	152.217	69.5513	82.6654	-13.1141	0.598946	0.318619	zinc-binding protein, putative, expressed
LOC_Os06g04440	turquoise	0.532851	117.558	51.4623	66.0955	-14.6332	0.532851	0.392815	expressed protein
LOC_Os06g04450	turquoise	0.968416	1584.17	1158.75	425.426	733.321	0.968416	0.755991	Sec1 family transport protein, putative, expressed
LOC_Os02g56080	turquoise	0.590516	101.004	54.4958	46.5082	7.98768	0.590516	0.282948	retrotransposon protein, putative, Ty3-gypsy subclass, expressed
LOC_Os03g52750	turquoise	0.487905	136.053	40.7424	95.311	-54.5687	0.487905	0.484105	cyclin, putative, expressed
LOC_Os02g15780	turquoise	0.794834	824.744	375.404	449.34	-73.9365	0.794834	0.447335	expressed protein
LOC_Os07g48660	turquoise	0.426061	89.0784	25.65	63.4284	-37.7783	0.426061	0.270737	bZIP transcription factor domain containing protein, expressed
LOC_Os12g39070	turquoise	0.70922	371.878	165.751	206.127	-40.3761	0.70922	0.362929	TATA-binding protein, putative, expressed
LOC_Os02g15790	turquoise	0.75206	727.966	335.825	392.14	-56.3147	0.75206	0.411219	expressed protein
LOC_Os04g38270	turquoise	0.804292	814.732	419.971	394.761	25.2093	0.804292	0.40051	expressed protein
LOC_Os02g21650	turquoise	0.480606	294.746	116.554	178.192	-61.6382	0.480606	0.11978	prefoldin, putative, expressed
LOC_Os01g34860	turquoise	0.762398	533.563	251.28	282.283	-31.0034	0.762398	0.519262	expressed protein
LOC_Os02g15760	turquoise	0.675683	277.801	119.087	158.714	-39.6269	0.675683	0.559207	helix-loop-helix DNA-binding domain containing protein, expressed
LOC_Os02g56030	turquoise	0.83987	924.114	426.843	497.271	-70.4276	0.83987	0.78423	expressed protein
LOC_Os03g17020	turquoise	0.619019	317.236	121.694	195.542	-73.8476	0.619019	0.628098	GTPase-activating protein, putative, expressed
LOC_Os07g05880	turquoise	0.898317	1709.76	676.184	1033.57	-357.388	0.898317	0.781289	OsFBK18 - F-box domain and kelch repeat containing protein, expressed
LOC_Os01g71540	turquoise	0.663721	421.129	178.85	242.279	-63.4292	0.663721	0.717249	expressed protein
LOC_Os02g56040	turquoise	0.572445	204.03	78.969	125.061	-46.0925	0.572445	0.601999	chaperone protein dnaJ, putative, expressed
LOC_Os03g17030	turquoise	0.971654	1657.53	1101.85	555.685	546.163	0.971654	0.811135	polyadenylate-binding protein, putative, expressed
LOC_Os12g13420	turquoise	0.951883	1316.43	928.683	387.749	540.934	0.951883	0.692497	transposon protein, putative, CACTA, En/Spm sub-class, expressed
LOC_Os08g22750	turquoise	0.585737	91.6264	52.8651	38.7613	14.1038	0.585737	0.349668	retrotransposon protein, putative, Ty3-gypsy subclass, expressed
LOC_Os03g39010	turquoise	0.839342	1073.81	461.716	612.096	-150.38	0.839342	0.657068	possible lysine decarboxylase domain containing protein, expressed
LOC_Os01g71624	turquoise	0.452021	44.9121	20.9874	23.9246	-2.9372	0.452021	0.520812	expressed protein
LOC_Os03g39000	turquoise	0.926011	1577.14	812.379	764.765	47.6145	0.926011	0.700575	inositol-1-monophosphatase, putative, expressed
LOC_Os03g05520	turquoise	0.559652	86.1466	42.5188	43.6278	-1.10894	0.559652	0.428005	nicotiana lesion-inducing like, putative, expressed
LOC_Os09g37040	turquoise	0.290068	70.3233	14.5893	55.7339	-41.1446	0.290068	0.370457	DUF630/DUF632 domains containing protein, putative, expressed
LOC_Os03g13614	turquoise	0.800219	753.563	336.297	417.266	-80.9687	0.800219	0.680364	transcription factor, putative, expressed
LOC_Os04g22420	turquoise	0.844909	860.472	452.638	407.834	44.8033	0.844909	0.676378	retrotransposon protein, putative, unclassified, expressed
LOC_Os03g05540	turquoise	0.339463	142.045	37.1918	104.853	-67.6615	0.339463	0.0162337	tetratricopeptide repeat containing protein, putative, expressed
LOC_Os01g64510	turquoise	0.516737	82.6427	41.5714	41.0713	0.500088	0.516737	0.44009	retrotransposon protein, putative, unclassified, expressed
LOC_Os03g52690	turquoise	0.81349	760.509	374.672	385.837	-11.1657	0.81349	0.484071	CBS domain containing membrane protein, putative, expressed
LOC_Os03g05560	turquoise	0.754948	570.074	242.777	327.297	-84.5207	0.754948	0.705319	zinc finger, C3HC4 type domain containing protein, expressed
LOC_Os09g37006	turquoise	0.804174	944.203	465.025	479.178	-14.153	0.804174	0.575138	protein of unknown function domain containing protein, expressed
LOC_Os04g22430	turquoise	0.834345	818.487	418.071	400.415	17.6558	0.834345	0.719294	retrotransposon protein, putative, unclassified, expressed
LOC_Os01g18110	turquoise	0.712219	608.236	237.186	371.05	-133.863	0.712219	0.795835	cinnamoyl CoA reductase, putative, expressed
LOC_Os04g44780	turquoise	0.56271	110.252	52.2948	57.9576	-5.66275	0.56271	0.378631	beta-expansin precursor, putative, expressed
LOC_Os06g08820	turquoise	0.535432	102.131	36.7716	65.359	-28.5874	0.535432	0.514438	RING-H2 finger protein, putative, expressed
LOC_Os09g01134	turquoise	0.876151	1154.42	844.763	309.661	535.102	0.876151	0.724772	expressed protein
LOC_Os10g35330	turquoise	0.663218	430.491	199.554	230.937	-31.3836	0.663218	0.281743	expressed protein
LOC_Os06g08810	turquoise	0.918817	1269.8	979.984	289.816	690.168	0.918817	0.71044	NAD dependent epimerase/dehydratase family protein, putative, expressed
LOC_Os06g43850	turquoise	0.668757	406.338	172.774	233.564	-60.7898	0.668757	0.512588	ATP synthase F1, delta subunit family protein, putative, expressed
LOC_Os11g02950	turquoise	0.871972	1110.71	626.155	484.556	141.599	0.871972	0.785796	auxin efflux carrier component, putative, expressed
LOC_Os03g09850	turquoise	0.8508	965.136	534.689	430.447	104.242	0.8508	0.73397	auxin-responsive protein-related, putative, expressed
LOC_Os10g35300	turquoise	0.573673	153.991	65.5653	88.426	-22.8607	0.573673	0.565282	dof zinc finger domain containing protein, putative, expressed
LOC_Os06g08860	turquoise	0.866602	904.326	617.19	287.136	330.053	0.866602	0.767919	transporter family protein, putative, expressed
LOC_Os01g49430	turquoise	0.776853	501.619	307.668	193.951	113.717	0.776853	0.738393	DnaK family protein, putative, expressed
LOC_Os03g09870	turquoise	0.516081	320.971	144.537	176.435	-31.898	0.516081	0.0589828	mitochondrial import inner membrane translocase subunit Tim17, putative, expressed
LOC_Os06g08850	turquoise	0.827813	1035.58	446.845	588.733	-141.888	0.827813	0.457043	cyclic nucleotide-gated ion channel 14, putative, expressed
LOC_Os10g35310	turquoise	0.89613	978.597	628.935	349.662	279.274	0.89613	0.700502	expressed protein
LOC_Os10g35294	turquoise	0.555383	88.2048	38.9181	49.2867	-10.3687	0.555383	0.438088	fiber protein Fb34, putative, expressed
LOC_Os06g08770	turquoise	0.630172	292.838	149.905	142.933	6.97198	0.630172	0.521012	ruvB-like 2, putative, expressed
LOC_Os09g32968	turquoise	0.77064	634.595	316.334	318.261	-1.92755	0.77064	0.497306	emp24/gp25L/p24 family protein, putative, expressed
LOC_Os08g44790	turquoise	0.92529	1300.43	998.861	301.566	697.295	0.92529	0.749274	expansin precursor, putative, expressed
LOC_Os02g38804	turquoise	0.453056	66.8578	24.5717	42.2861	-17.7143	0.453056	0.452775	protein phosphatase 2C containing protein, expressed
LOC_Os03g17170	turquoise	0.867683	934.627	592.599	342.028	250.57	0.867683	0.678416	zinc finger, C3HC4 type domain containing protein, expressed
LOC_Os11g02964	turquoise	0.630455	455.815	113.467	342.349	-228.882	0.630455	0.771866	FAR1 family protein, expressed
LOC_Os09g32930	turquoise	0.860432	976.467	516.962	459.505	57.4574	0.860432	0.570876	retrotransposon protein, putative, SINE subclass, expressed
LOC_Os06g08790	turquoise	0.443657	119.719	39.2422	80.4767	-41.2345	0.443657	0.0630731	ORC1 - Putative origin recognition complex subunit 1, expressed
LOC_Os08g44770	turquoise	0.652316	255.675	114.616	141.059	-26.4431	0.652316	0.664609	copper/zinc superoxide dismutase, putative, expressed
LOC_Os02g56190	turquoise	0.766639	545.564	292.367	253.197	39.1693	0.766639	0.658912	expressed protein
LOC_Os04g51510	turquoise	0.65254	338.236	123.667	214.569	-90.9015	0.65254	0.51006	glycosyl hydrolases family 16, putative, expressed
LOC_Os10g28830	turquoise	0.869959	919.193	532.563	386.63	145.933	0.869959	0.686049	expressed protein
LOC_Os06g04340	turquoise	0.818072	837.848	447.896	389.952	57.9447	0.818072	0.500185	expressed protein
LOC_Os02g21750	turquoise	0.960403	1754.21	987.461	766.749	220.712	0.960403	0.690262	MDR-like ABC transporter, putative, expressed
LOC_Os01g25440	turquoise	0.848061	839.631	634.459	205.172	429.287	0.848061	0.752323	thiamin pyrophosphokinase 1, putative, expressed
LOC_Os08g22660	turquoise	0.619732	117.505	68.8139	48.6907	20.1233	0.619732	0.342656	retrotransposon, putative, centromere-specific, expressed
LOC_Os10g05210	turquoise	0.785436	380.727	289.806	90.921	198.885	0.785436	0.420737	OsFBX368 - F-box domain containing protein, expressed
LOC_Os04g38350	turquoise	0.881411	960.309	643.337	316.973	326.364	0.881411	0.771782	expressed protein
LOC_Os01g13950	turquoise	0.586228	203.082	63.5301	139.552	-76.0214	0.586228	0.590539	OsGrx_A1 - glutaredoxin subgroup III, expressed
LOC_Os02g56150	turquoise	0.650826	249.925	173.905	76.0202	97.8844	0.650826	0.471206	expressed protein
LOC_Os01g25460	turquoise	0.952111	1691.74	1139.54	552.198	587.345	0.952111	0.807437	uncharacterized protein At4g06744 precursor, putative, expressed
LOC_Os03g17150	turquoise	0.586917	174.975	83.7637	91.2111	-7.44735	0.586917	0.52012	ZOS3-09 - C2H2 zinc finger protein, expressed
LOC_Os07g48790	turquoise	0.909149	1505.02	766.896	738.121	28.7753	0.909149	0.62718	SNF1-related protein kinase regulatory subunit beta-1, putative, expressed
LOC_Os03g13570	turquoise	0.867542	1001.64	499.73	501.907	-2.1764	0.867542	0.751575	glycosyl hydrolases family 16, putative, expressed
LOC_Os07g48780	turquoise	0.891053	1214.88	724.357	490.523	233.834	0.891053	0.754106	OsCam1-2 - Calmodulin, expressed
LOC_Os12g02390	turquoise	0.782657	531.771	302.111	229.66	72.4518	0.782657	0.643646	vacuolar-sorting receptor precursor, putative, expressed
LOC_Os06g04360	turquoise	0.703836	316.088	159.067	157.021	2.04585	0.703836	0.328471	expressed protein
LOC_Os01g25760	turquoise	0.406082	67.3248	21.8567	45.4681	-23.6115	0.406082	0.239122	powdery mildew resistance protein PM3F, putative, expressed
LOC_Os06g08900	turquoise	0.668497	306.736	143.547	163.19	-19.6427	0.668497	0.384344	glutamate receptor 2.6 precursor, putative, expressed
LOC_Os04g42220	turquoise	0.924372	1317.65	1011.5	306.148	705.352	0.924372	0.725092	GPI-anchored protein, putative, expressed
LOC_Os10g28400	turquoise	0.627054	211.46	123.739	87.7215	36.0175	0.627054	0.481489	MTN26L4 - MtN26 family protein precursor, expressed
LOC_Os04g42210	turquoise	0.86502	1031.68	809.736	221.947	587.789	0.86502	0.699516	GPI-anchored protein, putative, expressed
LOC_Os04g22510	turquoise	0.605541	171.708	114.429	57.2788	57.1503	0.605541	0.389845	expressed protein
LOC_Os07g27950	turquoise	0.689805	377.285	183.461	193.824	-10.3628	0.689805	0.801356	RING zinc finger protein, putative, expressed
LOC_Os10g35440	turquoise	0.896972	972.8	725.834	246.967	478.867	0.896972	0.726383	pentatricopeptide repeat domain containing protein, putative, expressed
LOC_Os06g23504	turquoise	0.37588	89.2653	28.8167	60.4486	-31.6319	0.37588	0.401736	DTW domain containing protein, putative, expressed
LOC_Os06g08920	turquoise	0.548637	135.539	68.9101	66.6291	2.28102	0.548637	0.362157	expressed protein
LOC_Os11g23220	turquoise	0.890516	1124.77	883.742	241.027	642.715	0.890516	0.676372	myosin, putative, expressed
LOC_Os10g28480	turquoise	0.517558	51.8906	23.9469	27.9437	-3.99682	0.517558	0.478928	expressed protein
LOC_Os04g51290	turquoise	0.495349	58.6854	29.2756	29.4098	-0.134109	0.495349	0.317372	expressed protein
LOC_Os06g23570	turquoise	0.783271	536.118	265.977	270.141	-4.16442	0.783271	0.483033	expressed protein
LOC_Os02g46260	turquoise	0.609079	317.068	115.452	201.615	-86.1629	0.609079	0.216639	OsSCP9 - Putative Serine Carboxypeptidase homologue, expressed
LOC_Os10g35450	turquoise	0.914598	1666.63	762.099	904.529	-142.43	0.914598	0.811868	serine/threonine-protein kinase, putative, expressed
LOC_Os11g23236	turquoise	0.406015	38.2641	19.521	18.743	0.777998	0.406015	0.336262	retrotransposon protein, putative, Ty3-gypsy subclass, expressed
LOC_Os10g35390	turquoise	0.509964	97.8189	47.7417	50.0772	-2.33547	0.509964	0.390724	acyltransferase, putative, expressed
LOC_Os05g26760	turquoise	0.724521	351.551	262.007	89.5441	172.463	0.724521	0.696164	expressed protein
LOC_Os01g49720	turquoise	0.624202	266.152	92.5957	173.557	-80.9608	0.624202	0.616085	glutathione S-transferase, putative, expressed
LOC_Os06g43410	turquoise	0.771416	676.8	323.949	352.851	-28.9016	0.771416	0.727588	cytochrome P450, putative, expressed
LOC_Os01g49730	turquoise	0.579498	141.168	58.2296	82.9383	-24.7087	0.579498	0.582576	expressed protein
LOC_Os04g44610	turquoise	0.814059	937.837	415.788	522.05	-106.262	0.814059	0.423162	white-brown complex homolog protein 11, putative, expressed
LOC_Os04g51260	turquoise	0.861533	1243.04	558.167	684.868	-126.701	0.861533	0.792024	expressed protein
LOC_Os04g44620	turquoise	0.454066	102.842	31.073	71.7693	-40.6963	0.454066	0.486968	hus1-like protein, expressed
LOC_Os04g38450	turquoise	0.943914	1596.9	896.761	700.141	196.62	0.943914	0.632333	gamma-glutamyltranspeptidase 1 precursor, putative, expressed
LOC_Os12g02230	turquoise	0.526314	161.582	53.6493	107.933	-54.2834	0.526314	0.393842	expressed protein
LOC_Os06g43440	turquoise	0.294588	30.5189	7.39453	23.1243	-15.7298	0.294588	0.423077	cytochrome P450, putative, expressed
LOC_Os06g08890	turquoise	0.695182	330.965	180.031	150.934	29.0971	0.695182	0.557163	glutamate receptor 3.4 precursor, putative, expressed
LOC_Os06g04610	turquoise	0.726011	673.932	240.067	433.865	-193.798	0.726011	0.738453	ribosome-binding factor A, chloroplast precursor, putative, expressed
LOC_Os09g32860	turquoise	0.74595	332.638	227.95	104.689	123.261	0.74595	0.416707	OsFBX335 - F-box domain containing protein, expressed
LOC_Os03g13220	turquoise	0.805306	660.832	404.688	256.144	148.545	0.805306	0.829037	expressed protein
LOC_Os07g32774	turquoise	0.823718	559.183	376.168	183.015	193.153	0.823718	0.522692	chorismate mutase/prephenate dehydratase, putative, expressed
LOC_Os11g07124	turquoise	0.730796	388.476	282.954	105.522	177.432	0.730796	0.745414	EFR, putative, expressed
LOC_Os03g05280	turquoise	0.645856	252.864	98.2002	154.664	-56.4635	0.645856	0.306351	ras-related protein, putative, expressed
LOC_Os07g48430	turquoise	0.917718	1394.69	757.203	637.487	119.716	0.917718	0.572073	nucleoside-triphosphatase, putative, expressed
LOC_Os06g35160	turquoise	0.599555	501.722	162.558	339.164	-176.606	0.599555	0.273358	CAMK_KIN1/SNF1/Nim1_like.26 - CAMK includes calcium/calmodulin depedent protein kinases, expressed
LOC_Os12g02280	turquoise	0.270119	122.228	20.3633	101.865	-81.5016	0.270119	0.283158	pentatricopeptide, putative, expressed
LOC_Os07g32761	turquoise	0.72767	260.237	175.882	84.3548	91.5276	0.72767	0.637055	expressed protein
LOC_Os06g35165	turquoise	0.639074	388.301	138.795	249.505	-110.71	0.639074	0.704045	expressed protein
LOC_Os02g21840	turquoise	0.827426	728.394	388.581	339.813	48.7679	0.827426	0.585396	retrotransposon protein, putative, unclassified, expressed
LOC_Os03g05250	turquoise	0.461936	26.3957	12.1501	14.2456	-2.09551	0.461936	0.196549	expressed protein
LOC_Os03g25620	turquoise	0.673149	297.895	140.374	157.521	-17.1465	0.673149	0.655697	LTV1, putative, expressed
LOC_Os07g48400	turquoise	0.864116	867.561	522.124	345.437	176.686	0.864116	0.582038	retrotransposon protein, putative, unclassified, expressed
LOC_Os03g41710	turquoise	0.584737	118.735	63.8029	54.9318	8.87115	0.584737	0.427289	retrotransposon protein, putative, Ty3-gypsy subclass, expressed
LOC_Os07g36880	turquoise	0.926936	1188.41	769.152	419.254	349.898	0.926936	0.639334	expressed protein
LOC_Os09g29060	turquoise	0.867418	853.588	504.974	348.614	156.359	0.867418	0.57185	expressed protein
LOC_Os10g28510	turquoise	0.340102	22.3294	8.0826	14.2468	-6.16421	0.340102	0.176765	expressed protein
LOC_Os03g52450	turquoise	0.742204	559.317	422.504	136.814	285.69	0.742204	0.654407	GATA transcription factor 25, putative, expressed
LOC_Os11g19210	turquoise	0.445271	89.3686	29.8094	59.5592	-29.7498	0.445271	0.572982	beta-D-xylosidase, putative, expressed
LOC_Os03g05320	turquoise	0.697219	400.515	176.845	223.67	-46.8245	0.697219	0.605239	expressed protein
LOC_Os04g42130	turquoise	0.872728	1141.37	654.86	486.507	168.353	0.872728	0.858768	integral membrane transporter family protein, putative, expressed
LOC_Os04g42134	turquoise	0.854712	1433.03	596.767	836.26	-239.493	0.854712	0.840017	enhancer of rudimentary protein, putative, expressed
LOC_Os11g19220	turquoise	0.224019	25.962	7.29535	18.6666	-11.3713	0.224019	0.0530379	mitosis protein dim1, putative, expressed
LOC_Os03g52475	turquoise	0.883195	1176.21	689.482	486.725	202.757	0.883195	0.747253	pentatricopeptide, putative, expressed
LOC_Os04g42120	turquoise	0.694125	296.488	144.372	152.116	-7.74382	0.694125	0.608616	N-acetyltransferase ESCO2, putative, expressed
LOC_Os03g52470	turquoise	0.908546	884.213	664.956	219.257	445.698	0.908546	0.649912	WD domain, G-beta repeat domain containing protein, expressed
LOC_Os10g05088	turquoise	0.898901	1569.99	719.338	850.651	-131.313	0.898901	0.759675	GDSL-like lipase/acylhydrolase, putative, expressed
LOC_Os12g13320	turquoise	0.400206	126.269	27.8403	98.4283	-70.5881	0.400206	0.395989	argininosuccinate synthase, chloroplast precursor, putative, expressed
LOC_Os04g34030	turquoise	0.418952	21.0101	7.88599	13.1241	-5.23812	0.418952	0.294257	U-box domain-containing protein, putative, expressed
LOC_Os08g22380	turquoise	0.704558	336.326	193.866	142.46	51.4065	0.704558	0.571062	retrotransposon protein, putative, unclassified, expressed
LOC_Os10g35530	turquoise	0.293774	121.581	16.5858	104.995	-88.4094	0.293774	0.189036	hydrolase, alpha/beta fold family domain containing protein, expressed
LOC_Os10g23100	turquoise	0.910262	1558.93	730.249	828.686	-98.4372	0.910262	0.729495	ras-related protein, putative, expressed
LOC_Os12g25630	turquoise	0.776715	645.167	318.667	326.501	-7.83426	0.776715	0.54457	sulfite oxidase, putative, expressed
LOC_Os10g28570	turquoise	0.616825	187.555	81.7147	105.841	-24.1258	0.616825	0.508878	expressed protein
LOC_Os04g44550	turquoise	0.523532	304.363	135.235	169.128	-33.8925	0.523532	0.214683	CHCH domain containing protein, expressed
LOC_Os10g35550	turquoise	0.829319	1164.92	466.181	698.74	-232.558	0.829319	0.80095	pre-mRNA-processing factor 6, putative, expressed
LOC_Os12g25640	turquoise	0.729933	331.276	168.497	162.779	5.71828	0.729933	0.532917	SAP domain containing protein, expressed
LOC_Os01g49630	turquoise	0.35326	21.1733	5.69145	15.4819	-9.79046	0.35326	0.117663	proteophosphoglycan ppg4, putative, expressed
LOC_Os02g46380	turquoise	0.673655	484.58	195.886	288.693	-92.807	0.673655	0.727025	purine permease, putative, expressed
LOC_Os12g41350	turquoise	0.84617	670.111	523.757	146.354	377.404	0.84617	0.545037	meiotic asynaptic mutant 1, putative, expressed
LOC_Os05g26660	turquoise	0.973647	1648.54	1148.92	499.62	649.301	0.973647	0.745229	NADH-ubiquinone oxidoreductase, mitochondrial precursor, putative, expressed
LOC_Os10g35490	turquoise	0.888288	1391.8	652.852	738.949	-86.0968	0.888288	0.815091	hydrolase, alpha/beta fold family domain containing protein, expressed
LOC_Os04g51390	turquoise	0.533865	177.279	64.9089	112.37	-47.4607	0.533865	0.145944	aldose 1-epimerase, putative, expressed
LOC_Os06g04530	turquoise	0.464474	150.492	40.3556	110.137	-69.7812	0.464474	0.481031	OsClp9 - Putative Clp protease homologue, expressed
LOC_Os04g44500	turquoise	0.562764	244.392	74.9273	169.465	-94.5378	0.562764	0.593157	GEM, putative, expressed
LOC_Os10g23050	turquoise	0.338961	10.0146	4.40829	5.60635	-1.19806	0.338961	0.113778	helix-loop-helix DNA-binding protein, putative, expressed
LOC_Os06g43520	turquoise	0.755316	866.091	383.524	482.567	-99.043	0.755316	0.406365	cytochrome P450 71D7, putative, expressed
LOC_Os04g38560	turquoise	0.899081	1159.31	896.639	262.673	633.966	0.899081	0.702769	pectinesterase, putative, expressed
LOC_Os01g49600	turquoise	0.755778	442.669	221.402	221.267	0.135463	0.755778	0.387575	expressed protein
LOC_Os06g04510	turquoise	0.443287	96.5237	27.1837	69.34	-42.1564	0.443287	0.462815	enolase, putative, expressed
LOC_Os06g43540	turquoise	0.825866	782.275	407.171	375.104	32.0668	0.825866	0.551664	retrotransposon protein, putative, unclassified, expressed
LOC_Os07g36910	turquoise	0.358731	30.7091	11.6349	19.0742	-7.43927	0.358731	0.0646549	OsFBX254 - F-box domain containing protein, expressed
LOC_Os10g23090	turquoise	0.864875	989.916	565.297	424.619	140.678	0.864875	0.750071	homeobox associated leucine zipper, putative, expressed
LOC_Os12g41400	turquoise	0.743751	562.138	261.077	301.06	-39.9833	0.743751	0.686693	eukaryotic translation initiation factor 2 subunit gamma, putative, expressed
LOC_Os04g51340	turquoise	0.859546	994.985	765.741	229.244	536.497	0.859546	0.648562	pectinacetylesterase domain containing protein, expressed
LOC_Os12g02120	turquoise	0.939683	1565.06	1002.17	562.895	439.27	0.939683	0.769678	dual specificity protein phosphatase, putative, expressed
LOC_Os06g43550	turquoise	0.916293	1278.37	796.329	482.046	314.283	0.916293	0.684686	expressed protein
LOC_Os07g36920	turquoise	0.835618	934.233	435.077	499.157	-64.0798	0.835618	0.507379	OsFBX255 - F-box domain containing protein, expressed
LOC_Os04g51330	turquoise	0.971396	1710.07	1166.92	543.15	623.768	0.971396	0.766511	maltose excess protein 1-like, chloroplast precursor, putative, expressed
LOC_Os06g35030	turquoise	0.858528	1347.85	592.53	755.319	-162.789	0.858528	0.606484	RNA recognition motif containing protein, putative, expressed
LOC_Os06g43570	turquoise	0.456016	119.162	39.0036	80.1583	-41.1547	0.456016	0.410015	peptidase, T1 family, putative, expressed
LOC_Os12g39180	turquoise	0.80932	601.273	360.598	240.674	119.924	0.80932	0.53281	natural resistance-associated macrophage protein, putative, expressed
LOC_Os07g32880	turquoise	0.826879	888.117	431.204	456.913	-25.7098	0.826879	0.778549	ATP synthase gamma chain, putative, expressed
LOC_Os06g35090	turquoise	0.784997	442.375	270.273	172.102	98.1715	0.784997	0.487723	expressed protein
LOC_Os04g34100	turquoise	0.91557	1677.79	850.562	827.227	23.3347	0.91557	0.814439	expressed protein
LOC_Os03g52400	turquoise	0.627877	418.466	176.332	242.134	-65.8015	0.627877	0.444706	ribosomal protein L7/L12 C-terminal domain containing protein, expressed
LOC_Os02g21970	turquoise	0.752086	651.933	291.401	360.532	-69.1308	0.752086	0.781816	26S protease regulatory subunit 6B, putative, expressed
LOC_Os09g37320	turquoise	0.934583	1554.84	927.599	627.24	300.359	0.934583	0.868241	retrotransposon protein, putative, unclassified, expressed
LOC_Os01g13440	turquoise	0.91094	1232.08	959.522	272.558	686.964	0.91094	0.698707	pollen allergen Cyn d 23, putative, expressed
LOC_Os03g05800	turquoise	0.43893	65.5968	31.517	34.0798	-2.56275	0.43893	0.482973	expressed protein
LOC_Os03g05806	turquoise	0.747914	424.886	230.77	194.116	36.654	0.747914	0.639206	pseudouridine synthase family protein, putative, expressed
LOC_Os04g44410	turquoise	0.91236	1667.13	775.704	891.425	-115.722	0.91236	0.72209	OsSCP25 - Putative Serine Carboxypeptidase homologue, expressed
LOC_Os10g35690	turquoise	0.672186	563.84	213.689	350.151	-136.463	0.672186	0.464903	ribosomal protein S18 containing protein, expressed
LOC_Os10g11110	turquoise	0.733	531.1	224.782	306.317	-81.5349	0.733	0.534519	expressed protein
LOC_Os09g37340	turquoise	0.462762	70.5688	21.5412	49.0276	-27.4864	0.462762	0.191108	expressed protein
LOC_Os09g37344	turquoise	0.557843	186.919	55.8299	131.089	-75.2595	0.557843	0.260634	expressed protein
LOC_Os01g13460	turquoise	0.89615	1196.34	851.486	344.857	506.63	0.89615	0.727598	helix-loop-helix DNA-binding domain containing protein, expressed
LOC_Os10g28260	turquoise	0.838529	877.309	465.324	411.985	53.3397	0.838529	0.757157	expressed protein
LOC_Os12g39520	turquoise	0.821093	854.205	478.692	375.512	103.18	0.821093	0.532221	OsFBDUF66 - F-box and DUF domain containing protein, expressed
LOC_Os10g11140	turquoise	0.876108	1216.67	639.288	577.377	61.9111	0.876108	0.700146	phosphoglucomutase, putative, expressed
LOC_Os05g14034	turquoise	0.751276	572.561	385.161	187.4	197.76	0.751276	0.556105	expressed protein
LOC_Os09g37300	turquoise	0.843473	992.922	674.702	318.22	356.483	0.843473	0.760225	transporter, monovalent cation:proton antiporter-2 family, putative, expressed
LOC_Os04g38740	turquoise	0.718493	248.934	165.411	83.5231	81.8878	0.718493	0.528965	MYB family transcription factor, putative, expressed
LOC_Os07g48229	turquoise	0.980358	1716.18	1103.19	612.984	490.21	0.980358	0.706504	vacuolar-sorting receptor precursor, putative, expressed
LOC_Os01g64890	turquoise	0.819358	1055.23	499.898	555.336	-55.438	0.819358	0.492639	CorA-like magnesium transporter protein, putative, expressed
LOC_Os10g35640	turquoise	0.146349	86.8574	22.5102	64.3471	-41.8369	0.146349	0.0161414	Rf1, mitochondrial precursor, putative, expressed
LOC_Os03g05880	turquoise	0.609236	190.702	105.243	85.4587	19.7846	0.609236	0.559742	monooxygenase, putative, expressed
LOC_Os05g26902	turquoise	0.434113	45.4718	12.9025	32.5693	-19.6668	0.434113	0.327347	chaperone protein dnaJ, putative, expressed
LOC_Os04g51910	turquoise	0.824512	1092.04	452.152	639.893	-187.741	0.824512	0.783574	proteasome/cyclosome repeat containing protein, expressed
LOC_Os03g05870	turquoise	0.718228	541.574	268.149	273.425	-5.27541	0.718228	0.769805	Fe-S metabolism associated domain containing protein, expressed
LOC_Os03g05860	turquoise	0.655703	203.127	141.263	61.8643	79.3988	0.655703	0.650317	expressed protein
LOC_Os07g48260	turquoise	0.486607	120.427	41.0045	79.4223	-38.4178	0.486607	0.621194	WRKY47, expressed
LOC_Os10g35604	turquoise	0.675779	439.495	163.68	275.815	-112.135	0.675779	0.801489	expressed protein
LOC_Os01g71970	turquoise	0.795266	430.61	289.694	140.916	148.778	0.795266	0.363326	GRAS family transcription factor containing protein, expressed
LOC_Os01g64870	turquoise	0.514743	259.183	92.6576	166.526	-73.868	0.514743	0.179763	expressed protein
LOC_Os03g46480	turquoise	0.73874	579.267	222.582	356.685	-134.103	0.73874	0.672274	ranBP1 domain containing protein, expressed
LOC_Os01g41300	turquoise	0.890249	976.374	642.556	333.818	308.738	0.890249	0.777037	expressed protein
LOC_Os04g51950	turquoise	0.412888	72.7669	25.1588	47.6081	-22.4494	0.412888	0.345645	serine/threonine-protein kinase HT1, putative, expressed
LOC_Os02g52190	turquoise	0.858421	733.079	508.5	224.58	283.92	0.858421	0.623846	helix-loop-helix DNA-binding protein, putative, expressed
LOC_Os02g52250	turquoise	0.763373	549.008	240.52	308.487	-67.9668	0.763373	0.49549	SKIP/SNW domain containing protein, expressed
LOC_Os11g02480	turquoise	0.689714	308.987	143.922	165.066	-21.1439	0.689714	0.490092	WRKY46, expressed
LOC_Os04g34460	turquoise	0.682786	319.919	128.006	191.914	-63.9079	0.682786	0.398107	PAP fibrillin family domain containing protein, expressed
LOC_Os02g52220	turquoise	0.187244	103.21	33.4453	69.7648	-36.3195	0.187244	0.0541015	PPR repeat domain containing protein, putative, expressed
LOC_Os01g41280	turquoise	0.520885	234.117	89.425	144.692	-55.2672	0.520885	0.258916	OsFBD4 - F-box and FBD domain containing protein, expressed
LOC_Os05g26926	turquoise	0.573156	149.031	66.021	83.0099	-16.9889	0.573156	0.708042	chaperone protein dnaJ, putative, expressed
LOC_Os01g41270	turquoise	0.799568	582.37	313.132	269.238	43.8936	0.799568	0.37979	OsFBD3 - F-box and FBD domain containing protein, expressed
LOC_Os11g02440	turquoise	0.694196	328.137	157.423	170.713	-13.2901	0.694196	0.430447	chalcone--flavonone isomerase, putative, expressed
LOC_Os01g49930	turquoise	0.465339	235.369	78.945	156.424	-77.4789	0.465339	0.115553	expressed protein
LOC_Os10g11060	turquoise	0.817636	661.062	401.628	259.434	142.194	0.817636	0.463948	ACI13, putative, expressed
LOC_Os06g04840	turquoise	0.880139	891.532	593.547	297.985	295.563	0.880139	0.731403	leucine rich repeat protein, putative, expressed
LOC_Os05g51140	turquoise	0.890091	1307.54	641.795	665.745	-23.9503	0.890091	0.639184	expressed protein
LOC_Os06g04830	turquoise	0.705212	329.736	229.92	99.8159	130.104	0.705212	0.565995	leucine rich repeat protein, putative, expressed
LOC_Os04g38650	turquoise	0.455911	55.3249	13.9454	41.3795	-27.4341	0.455911	0.504753	expressed protein
LOC_Os06g04850	turquoise	0.709427	317.314	159.31	158.005	1.30482	0.709427	0.436047	homeobox associated leucine zipper, putative, expressed
LOC_Os03g13000	turquoise	0.716874	414.162	212.638	201.524	11.1142	0.716874	0.481056	GTP-binding protein, putative, expressed
LOC_Os05g51180	turquoise	0.367653	113.116	25.5868	87.529	-61.9422	0.367653	0.457394	hyaluronan/mRNA binding family domain containing protein, expressed
LOC_Os06g04880	turquoise	0.914744	1144.79	750.683	394.103	356.58	0.914744	0.643906	serine threonine kinase, putative, expressed
LOC_Os09g05100	turquoise	0.681755	259.883	131.206	128.677	2.52922	0.681755	0.604295	retrotransposon protein, putative, Ty3-gypsy subclass, expressed
LOC_Os03g13070	turquoise	0.353904	222.018	76.374	145.644	-69.2703	0.353904	0.0389233	thaumatin family domain containing protein, expressed
LOC_Os01g34480	turquoise	0.682989	371.46	172.275	199.186	-26.9112	0.682989	0.344486	NAD dependent epimerase/dehydratase family protein, putative, expressed
LOC_Os06g04870	turquoise	0.730484	542.432	235.892	306.54	-70.648	0.730484	0.759356	homeobox associated leucine zipper, putative, expressed
LOC_Os12g13824	turquoise	0.840856	938.398	493.101	445.297	47.8042	0.840856	0.616715	expressed protein
LOC_Os04g44300	turquoise	0.504984	112.549	33.5809	78.9684	-45.3875	0.504984	0.280263	transposon protein, putative, unclassified, expressed
LOC_Os11g15620	turquoise	0.776913	707.211	503.494	203.717	299.777	0.776913	0.626326	OsFBX420 - F-box domain containing protein, expressed
LOC_Os04g22000	turquoise	0.485787	55.677	28.6132	27.0638	1.54939	0.485787	0.501171	retrotransposon protein, putative, Ty3-gypsy subclass, expressed
LOC_Os01g34390	turquoise	0.774759	721.184	358.7	362.485	-3.785	0.774759	0.583798	prenyltransferase, putative, expressed
LOC_Os01g49890	turquoise	0.905697	1006.59	665.113	341.479	323.634	0.905697	0.62464	threonine synthase, chloroplast precursor, putative, expressed
LOC_Os08g32620	turquoise	0.810924	908.674	377.845	530.829	-152.984	0.810924	0.459318	ES43 protein, putative, expressed
LOC_Os04g38850	turquoise	0.757066	566.815	277.242	289.573	-12.3313	0.757066	0.716113	expressed protein
LOC_Os12g25400	turquoise	0.402165	36.9937	10.166	26.8277	-16.6617	0.402165	0.510778	expressed protein
LOC_Os06g28150	turquoise	0.87242	1264.05	668.414	595.634	72.7799	0.87242	0.793846	transposon protein, putative, unclassified, expressed
LOC_Os10g35730	turquoise	0.792362	772.453	393.506	378.947	14.5596	0.792362	0.447495	pentatricopeptide repeat domain containing protein, putative, expressed
LOC_Os12g39420	turquoise	0.791885	735.586	325.941	409.646	-83.7054	0.791885	0.516647	nucleobase-ascorbate transporter, putative, expressed
LOC_Os02g21230	turquoise	0.722473	390.692	175.507	215.184	-39.6773	0.722473	0.482922	F-box domain containing protein, expressed
LOC_Os12g39430	turquoise	0.765934	444.356	334.045	110.311	223.734	0.765934	0.60729	expressed protein
LOC_Os07g48330	turquoise	0.799694	441.546	341.245	100.301	240.944	0.799694	0.429746	cytochrome P450, putative, expressed
LOC_Os07g48390	turquoise	0.847636	1061.09	456.674	604.414	-147.739	0.847636	0.733828	proline-rich protein, putative, expressed
LOC_Os08g32660	turquoise	0.866774	891.268	529.183	362.085	167.098	0.866774	0.530489	expressed protein
LOC_Os02g21250	turquoise	0.684161	306.016	146.091	159.924	-13.8331	0.684161	0.556543	clathrin adaptor complex small chain domain containing protein, expressed
LOC_Os04g34330	turquoise	0.504716	38.972	20.1638	18.8082	1.35558	0.504716	0.270066	serine/threonine-protein kinase receptor precursor, putative, expressed
LOC_Os04g51990	turquoise	0.886614	1362.1	650.629	711.466	-60.8365	0.886614	0.905754	transferase family domain containing protein, expressed
LOC_Os04g34340	turquoise	0.771899	521.764	291.281	230.483	60.7978	0.771899	0.409664	expressed protein
LOC_Os07g09000	turquoise	0.734926	453.129	204.09	249.039	-44.9484	0.734926	0.480556	WD domain, G-beta repeat domain containing protein, expressed
LOC_Os10g03970	turquoise	0.805525	569.44	410.042	159.398	250.645	0.805525	0.683405	retrotransposon protein, putative, unclassified, expressed
LOC_Os06g04790	turquoise	0.823255	884.057	651.619	232.438	419.182	0.823255	0.7204	HAD superfamily phosphatase, putative, expressed
LOC_Os03g46400	turquoise	0.589525	143.384	90.8882	52.4962	38.3921	0.589525	0.531857	UDP-glucoronosyl and UDP-glucosyl transferase domain containing protein, expressed
LOC_Os11g02580	turquoise	0.844925	885.226	711.137	174.089	537.048	0.844925	0.660261	esterase, putative, expressed
LOC_Os05g51230	turquoise	0.947548	1536.05	1114.39	421.66	692.732	0.947548	0.7597	phosphatidylinositol 3- and 4-kinase family protein, putative, expressed
LOC_Os03g46420	turquoise	0.454689	51.7688	15.3512	36.4176	-21.0664	0.454689	0.394354	expressed protein
LOC_Os09g37510	turquoise	0.298177	159.243	53.0809	106.162	-53.0807	0.298177	0.0255631	DUF292 domain containing protein, expressed
LOC_Os01g13500	turquoise	0.847035	655.148	447.313	207.835	239.478	0.847035	0.649974	expressed protein
LOC_Os04g38770	turquoise	0.806356	658.708	537.678	121.031	416.647	0.806356	0.592653	OsMADS61 - MADS-box family gene with MIKCc type-box, expressed
LOC_Os04g38780	turquoise	0.898048	937.187	759.726	177.46	582.266	0.898048	0.613485	transcription factor, putative, expressed
LOC_Os03g13120	turquoise	0.743036	431.882	328.878	103.004	225.874	0.743036	0.555394	expressed protein
LOC_Os06g43304	turquoise	0.399755	109.969	26.0481	83.9207	-57.8726	0.399755	0.0635756	cytochrome P450, putative, expressed
LOC_Os04g38750	turquoise	0.779968	649.264	310.886	338.378	-27.492	0.779968	0.685576	plastid-specific 30S ribosomal protein 3, chloroplast precursor, putative, expressed
LOC_Os02g56580	turquoise	0.87278	1114.02	808.308	305.709	502.599	0.87278	0.735939	P21-Rho-binding domain containing protein, putative, expressed
LOC_Os06g16610	turquoise	0.735465	462.261	214.89	247.372	-32.4817	0.735465	0.559882	expressed protein
LOC_Os02g56570	turquoise	0.970186	1591.22	1095.02	496.2	598.817	0.970186	0.762112	TBC domain containing protein, expressed
LOC_Os07g09050	turquoise	0.689164	309.57	148.541	161.029	-12.4874	0.689164	0.448528	exostosin family protein, putative, expressed
LOC_Os07g09040	turquoise	0.363424	26.2446	8.03839	18.2062	-10.1678	0.363424	0.316226	peptidyl-prolyl cis-trans isomerase, FKBP-type, putative, expressed
LOC_Os01g13550	turquoise	0.537799	108.099	64.3484	43.7503	20.5982	0.537799	0.48709	beta-amylase, putative, expressed
LOC_Os02g56550	turquoise	0.667337	300.793	129.924	170.868	-40.9441	0.667337	0.649416	ABC transporter, ATP-binding protein, putative, expressed
LOC_Os10g03930	turquoise	0.483355	92.2596	36.9363	55.3233	-18.3871	0.483355	0.373778	OsFBX355 - F-box domain containing protein, expressed
LOC_Os03g13190	turquoise	0.671998	417.759	164.659	253.1	-88.4418	0.671998	0.60807	transposon protein, putative, unclassified, expressed
LOC_Os11g02510	turquoise	0.74143	361.937	196.081	165.856	30.2243	0.74143	0.435713	expressed protein
LOC_Os07g09020	turquoise	0.645094	329.607	128.073	201.534	-73.4612	0.645094	0.246374	argonaute, putative, expressed
LOC_Os04g38950	turquoise	0.715197	759.939	330.008	429.931	-99.923	0.715197	0.364101	class I glutamine amidotransferase, putative, expressed
LOC_Os04g44200	turquoise	0.762845	530.337	238.736	291.601	-52.8655	0.762845	0.485474	oxygen-evolving enhancer protein 3, chloroplast precursor, putative, expressed
LOC_Os12g39710	turquoise	0.827093	872.775	428.194	444.581	-16.3873	0.827093	0.793005	expressed protein
LOC_Os10g28000	turquoise	0.766282	853.621	366.3	487.32	-121.02	0.766282	0.352626	glutathione reductase, putative, expressed
LOC_Os04g38910	turquoise	0.348965	92.7913	23.8835	68.9079	-45.0244	0.348965	0.120462	atypical receptor-like kinase MARK, putative, expressed
LOC_Os04g38930	turquoise	0.880115	1028.15	583.117	445.033	138.084	0.880115	0.714336	pentatricopeptide, putative, expressed
LOC_Os07g48020	turquoise	0.428455	112.027	51.2699	60.7567	-9.48678	0.428455	0.485183	peroxidase precursor, putative, expressed
LOC_Os06g43080	turquoise	0.508299	98.7386	31.9322	66.8065	-34.8743	0.508299	0.542384	expressed protein
LOC_Os03g46260	turquoise	0.729243	459.918	198.166	261.752	-63.5858	0.729243	0.462079	DUF581 domain containing protein, expressed
LOC_Os04g38900	turquoise	0.468349	198.286	54.9085	143.378	-88.4694	0.468349	0.666207	prohibitin, putative, expressed
LOC_Os04g44290	turquoise	0.281394	149.165	53.1582	96.0066	-42.8484	0.281394	0.0727918	expressed protein
LOC_Os06g43060	turquoise	0.94287	1502.06	1072.4	429.666	642.731	0.94287	0.75665	expressed protein
LOC_Os04g51700	turquoise	0.574732	75.9085	49.854	26.0545	23.7994	0.574732	0.354533	DNA ligase I, ATP-dependent family protein, expressed
LOC_Os10g35820	turquoise	0.898859	1438.64	890.589	548.048	342.542	0.898859	0.826624	expressed protein
LOC_Os11g19790	turquoise	0.628337	179.77	133.903	45.8668	88.0359	0.628337	0.408309	O-methyltransferase, putative, expressed
LOC_Os10g35870	turquoise	0.597737	322.584	113.925	208.66	-94.7354	0.597737	0.671779	cytochrome b5-like Heme/Steroid binding domain containing protein, expressed
LOC_Os02g21320	turquoise	0.575582	98.417	48.8557	49.5613	-0.705676	0.575582	0.37491	expressed protein
LOC_Os02g15594	turquoise	0.973067	1550.75	1151.15	399.6	751.553	0.973067	0.735552	protein phosphatase 2C, putative, expressed
LOC_Os10g03570	turquoise	0.711661	357.591	179.753	177.837	1.91571	0.711661	0.286025	RGH1A, putative, expressed
LOC_Os03g05630	turquoise	0.442542	122.918	37.6412	85.2771	-47.6359	0.442542	0.53216	expressed protein
LOC_Os01g34630	turquoise	0.445107	84.342	34.1833	50.1587	-15.9754	0.445107	0.387627	retrotransposon protein, putative, Ty1-copia subclass, expressed
LOC_Os06g43000	turquoise	0.692236	539.06	325.467	213.593	111.874	0.692236	0.719606	nitrate-induced NOI protein, expressed
LOC_Os01g71790	turquoise	0.455237	41.4135	21.1334	20.2801	0.853281	0.455237	0.333431	NAM, putative, expressed
LOC_Os01g41030	turquoise	0.387221	204.076	82.4528	121.623	-39.1703	0.387221	0.0641985	ribosomal protein L25, putative, expressed
LOC_Os02g56280	turquoise	0.867477	1020.34	513.519	506.821	6.69783	0.867477	0.581125	zinc finger family protein, putative, expressed
LOC_Os01g71780	turquoise	0.822229	728.823	554.191	174.631	379.56	0.822229	0.6026	WD domain, G-beta repeat domain containing protein, expressed
LOC_Os01g34620	turquoise	0.620652	378.133	156.45	221.684	-65.2339	0.620652	0.294032	OsGrx_S15.1 - glutaredoxin subgroup II, expressed
LOC_Os10g35800	turquoise	0.987024	1922.43	1205.65	716.785	488.861	0.987024	0.80691	expressed protein
LOC_Os11g15290	turquoise	0.592256	220.816	110.392	110.424	-0.0324937	0.592256	0.4698	transposon protein, putative, CACTA, En/Spm sub-class, expressed
LOC_Os04g34680	turquoise	0.437355	46.6841	15.6494	31.0347	-15.3853	0.437355	0.345075	retrotransposon protein, putative, unclassified, expressed
LOC_Os06g43044	turquoise	0.569758	247.363	102.539	144.824	-42.2853	0.569758	0.752603	GDSL-like lipase/acylhydrolase, putative, expressed
LOC_Os04g34699	turquoise	0.735511	406.431	271.442	134.988	136.454	0.735511	0.639279	expressed protein
LOC_Os06g43030	turquoise	0.400726	35.9591	14.1206	21.8386	-7.71799	0.400726	0.256812	protein kinase domain containing protein, expressed
LOC_Os11g11120	turquoise	0.747564	321.874	203.598	118.276	85.3214	0.747564	0.408415	retrotransposon protein, putative, Ty3-gypsy subclass, expressed
LOC_Os12g41780	turquoise	0.883412	1160.9	877.652	283.252	594.401	0.883412	0.724563	glycosyl transferase family 17 protein, putative, expressed
LOC_Os11g02620	turquoise	0.656332	201.901	113.054	88.8471	24.2067	0.656332	0.611151	BTBN21 - Bric-a-Brac, Tramtrack, Broad Complex BTB domain with non-phototropic hypocotyl 3 NPH3 and coiled-coil domains, expressed
LOC_Os01g34690	turquoise	0.87634	1446.88	592.788	854.09	-261.302	0.87634	0.779129	expressed protein
LOC_Os01g13670	turquoise	0.601092	194.622	81.6498	112.972	-31.3221	0.601092	0.709098	expressed protein
LOC_Os12g41790	turquoise	0.563593	119.391	46.3	73.091	-26.791	0.563593	0.400844	DEFL3 - Defensin and Defensin-like DEFL family, expressed
LOC_Os12g41740	turquoise	0.380206	24.2205	8.74497	15.4756	-6.73059	0.380206	0.372379	retrotransposon protein, putative, unclassified
LOC_Os03g52940	turquoise	0.614004	221.396	95.4184	125.977	-30.5589	0.614004	0.588859	expressed protein
LOC_Os01g34680	turquoise	0.692097	229.942	124.54	105.402	19.1388	0.692097	0.58085	expressed protein
LOC_Os02g56210	turquoise	0.695051	372.096	172.273	199.823	-27.5501	0.695051	0.758173	hydrolase, NUDIX family, domain containing protein, expressed
LOC_Os04g38880	turquoise	0.718377	364.465	179.58	184.885	-5.30576	0.718377	0.603294	dynein light chain type 1 domain containing protein, expressed
LOC_Os01g13610	turquoise	0.63765	285.387	156.025	129.362	26.6636	0.63765	0.662688	isoflavone reductase homolog IRL, putative, expressed
LOC_Os08g32920	turquoise	0.983903	1694.09	1138.38	555.703	582.682	0.983903	0.701182	dynamin-2B, putative, expressed
LOC_Os04g22060	turquoise	0.678952	280.096	133.982	146.113	-12.1312	0.678952	0.460677	retrotransposon protein, putative, unclassified, expressed
LOC_Os08g32910	turquoise	0.893586	1212.09	724.478	487.607	236.871	0.893586	0.720454	expressed protein
LOC_Os03g46190	turquoise	0.497763	140.554	44.4041	96.1503	-51.7462	0.497763	0.48204	parafibromin, putative, expressed
LOC_Os03g05730	turquoise	0.890959	1368.84	681.082	687.756	-6.67428	0.890959	0.767184	cell division control protein 48 homolog E, putative, expressed
LOC_Os06g04920	turquoise	0.920735	1189.42	763.274	426.144	337.131	0.920735	0.540663	zinc finger family protein, putative, expressed
LOC_Os08g32870	turquoise	0.69069	245.894	170.521	75.3731	95.148	0.69069	0.558943	aldehyde dehydrogenase, putative, expressed
LOC_Os01g71810	turquoise	0.484296	122.852	46.1639	76.6884	-30.5244	0.484296	0.738867	glycosyl hydrolases family 17, putative, expressed
LOC_Os04g51830	turquoise	0.883773	1018.78	821.82	196.959	624.86	0.883773	0.684601	OsHKT1;4 - Na+ transporter, expressed
LOC_Os10g35930	turquoise	0.969571	1596.41	1174.56	421.847	752.716	0.969571	0.77124	OsPLIM2c - LIM domain protein, putative actin-binding protein and transcription factor, expressed
LOC_Os10g35940	turquoise	0.887163	1089.85	579.789	510.063	69.7256	0.887163	0.582676	folylpolyglutamate synthetase, putative, expressed
LOC_Os04g44180	turquoise	0.917749	1321.07	788.446	532.62	255.826	0.917749	0.773975	expressed protein
LOC_Os04g51809	turquoise	0.780003	800.102	462.84	337.262	125.578	0.780003	0.700636	expressed protein
LOC_Os09g37250	turquoise	0.828234	617.729	387.197	230.532	156.665	0.828234	0.639192	high mobility group, putative, expressed
LOC_Os02g21490	turquoise	0.150512	32.0376	3.68065	28.3569	-24.6763	0.150512	0.0415239	WD domain, G-beta repeat domain containing protein, expressed
LOC_Os07g48120	turquoise	0.88979	961.848	582.722	379.127	203.595	0.88979	0.628791	expressed protein
LOC_Os01g71860	turquoise	0.503498	64.9009	22.4794	42.4215	-19.9421	0.503498	0.328229	glycosyl hydrolases family 17, putative, expressed
LOC_Os02g15690	turquoise	0.751872	620.104	261.324	358.781	-97.4571	0.751872	0.701299	polygalacturonase, putative, expressed
LOC_Os03g05770	turquoise	0.968869	1771.55	1115.82	655.727	460.095	0.968869	0.778515	peroxidase precursor, putative, expressed
LOC_Os04g44110	turquoise	0.787682	463.089	295.217	167.872	127.345	0.787682	0.356197	hydrolase, putative, expressed
LOC_Os10g03690	turquoise	0.792253	670.658	311.313	359.345	-48.0315	0.792253	0.670116	OsFBX346 - F-box domain containing protein, expressed
LOC_Os01g13710	turquoise	0.853005	955.262	758.274	196.988	561.285	0.853005	0.652745	transposon protein, putative, unclassified, expressed
LOC_Os02g15640	turquoise	0.691742	428.706	261.945	166.761	95.1837	0.691742	0.561492	CAPIP1, putative, expressed
LOC_Os04g34590	turquoise	0.347276	79.0912	28.4431	50.6481	-22.205	0.347276	0.411826	UPF0496 protein 2, putative, expressed
LOC_Os12g41810	turquoise	0.915965	1121	781.687	339.31	442.377	0.915965	0.769835	expressed protein
LOC_Os01g34520	turquoise	0.855527	825.189	628.794	196.394	432.4	0.855527	0.665228	expressed protein
LOC_Os12g41800	turquoise	0.727096	539.281	372.823	166.459	206.364	0.727096	0.702814	VTC2, putative, expressed
LOC_Os03g52870	turquoise	0.944341	1701.75	1083.3	618.452	464.843	0.944341	0.83927	WD-40 repeat family protein, putative, expressed
LOC_Os04g34580	turquoise	0.352876	73.3914	17.8724	55.519	-37.6465	0.352876	0.168705	FAD binding domain containing protein, expressed
LOC_Os04g44090	turquoise	0.968239	1624.64	1020.98	603.656	417.324	0.968239	0.705357	expressed protein
LOC_Os02g21500	turquoise	0.791124	886.859	392.644	494.215	-101.571	0.791124	0.584575	PE-PGRS family protein, putative, expressed
LOC_Os11g11240	turquoise	0.966604	1649	1022.79	626.213	396.576	0.966604	0.627919	expressed protein
LOC_Os12g13730	turquoise	0.55818	106.421	38.8765	67.5441	-28.6676	0.55818	0.596493	pleiotropic drug resistance protein 2, putative, expressed
LOC_Os10g35920	turquoise	0.841336	694.695	431.066	263.629	167.438	0.841336	0.504558	OsFBX389 - F-box domain containing protein, expressed
LOC_Os10g03740	turquoise	0.83545	1138.93	533.578	605.349	-71.7711	0.83545	0.530682	OsFBX348 - F-box domain containing protein, expressed
LOC_Os12g13710	turquoise	0.586621	218.436	120.727	97.7086	23.0189	0.586621	0.61062	hypothetical protein
LOC_Os11g02730	turquoise	0.500358	251.992	57.8372	194.155	-136.318	0.500358	0.0421075	harpin-induced protein 1 domain containing protein, expressed
LOC_Os11g11270	turquoise	0.604905	164.399	86.3498	78.0489	8.30083	0.604905	0.32803	expressed protein
LOC_Os02g56310	turquoise	0.751469	463.877	275.439	188.438	87.0011	0.751469	0.796688	calcium-dependent protein kinase isoform AK1, putative, expressed
LOC_Os05g22722	turquoise	0.49409	54.7702	21.6322	33.138	-11.5058	0.49409	0.243352	chloroplast 50S ribosomal protein L14, putative, expressed
LOC_Os01g41180	turquoise	0.347182	67.4915	20.8757	46.6158	-25.7401	0.347182	0.385993	THION19 - Plant thionin family protein precursor, putative, expressed
LOC_Os12g41860	turquoise	0.895124	1652.74	671.275	981.463	-310.188	0.895124	0.742586	START domain containing protein, expressed
LOC_Os05g01820	turquoise	0.648751	258.916	123.402	135.515	-12.113	0.648751	0.521818	cytochrome b5-like Heme/Steroid binding domain containing protein, expressed
LOC_Os10g05980	turquoise	0.870386	1335.54	605.572	729.964	-124.393	0.870386	0.866873	POEI13 - Pollen Ole e I allergen and extensin family protein precursor, expressed
LOC_Os07g05020	turquoise	0.918017	1119.93	754.859	365.075	389.784	0.918017	0.674544	expressed protein
LOC_Os03g25050	turquoise	0.500109	295.886	92.0159	203.87	-111.854	0.500109	0.124507	chaperonin, putative, expressed
LOC_Os07g05000	turquoise	0.477889	80.2095	26.6931	53.5164	-26.8232	0.477889	0.241273	oxidoreductase, aldo/keto reductase family protein, putative, expressed
LOC_Os03g25040	turquoise	0.76065	598.381	477.284	121.097	356.187	0.76065	0.59801	GDSL-like lipase/acylhydrolase, putative, expressed
LOC_Os05g38980	turquoise	0.922437	1303.58	990.364	313.211	677.152	0.922437	0.724445	respiratory burst oxidase, putative, expressed
LOC_Os07g05010	turquoise	0.780951	557.94	302.758	255.182	47.576	0.780951	0.520485	helix-loop-helix DNA-binding domain containing protein, expressed
LOC_Os05g47820	turquoise	0.491885	177.863	51.2661	126.597	-75.3313	0.491885	0.239852	expressed protein
LOC_Os03g25030	turquoise	0.893089	1451.31	742.981	708.329	34.6518	0.893089	0.84875	GDSL-like lipase/acylhydrolase, putative, expressed
LOC_Os03g25020	turquoise	0.846717	1180.57	549.511	631.059	-81.5478	0.846717	0.843194	expressed protein
LOC_Os04g42870	turquoise	0.72488	463.387	206.841	256.546	-49.705	0.72488	0.578237	methyltransferase domain containing protein, putative, expressed
LOC_Os04g42880	turquoise	0.485032	100.784	27.4419	73.3423	-45.9004	0.485032	0.517505	WD domain, G-beta repeat domain containing protein, expressed
LOC_Os07g44940	turquoise	0.776421	715.794	357.503	358.291	-0.788573	0.776421	0.565168	ATP12 ATPase, putative, expressed
LOC_Os07g44930	turquoise	0.447844	34.6984	10.1611	24.5372	-14.3761	0.447844	0.212845	dirigent, putative, expressed
LOC_Os05g38960	turquoise	0.747818	517.152	406.305	110.847	295.457	0.747818	0.629066	expressed protein
LOC_Os06g28510	turquoise	0.698941	251.237	153.498	97.7399	55.7577	0.698941	0.703674	retrotransposon protein, putative, unclassified, expressed
LOC_Os06g28524	turquoise	0.693004	220.558	132.172	88.3858	43.7865	0.693004	0.615508	expressed protein
LOC_Os01g53240	turquoise	0.896697	1157.19	649.083	508.106	140.977	0.896697	0.755007	BURP domain containing protein, expressed
LOC_Os02g56910	turquoise	0.493047	168.041	62.9146	105.126	-42.2117	0.493047	0.592324	lecithine cholesterol acyltransferase, putative, expressed
LOC_Os02g38140	turquoise	0.611546	302.966	120.451	182.515	-62.0648	0.611546	0.76909	glycosyl transferase family 17 protein, putative, expressed
LOC_Os11g34824	turquoise	0.82709	668.924	401.569	267.356	134.213	0.82709	0.515074	expressed protein
LOC_Os07g36260	turquoise	0.771216	526.363	280.983	245.38	35.6038	0.771216	0.429986	transposon protein, putative, Pong sub-class, expressed
LOC_Os07g36250	turquoise	0.869809	1369.33	586.682	782.652	-195.971	0.869809	0.79995	peptide chain release factor protein, putative, expressed
LOC_Os07g40620	turquoise	0.666025	199.301	123.924	75.3768	48.5472	0.666025	0.260341	saccharopine dehydrogenase, putative, expressed
LOC_Os12g33370	turquoise	0.784086	500.436	302.804	197.632	105.172	0.784086	0.514623	retrotransposon protein, putative, Ty3-gypsy subclass
LOC_Os11g34870	turquoise	0.791615	574.725	342.199	232.526	109.673	0.791615	0.551716	expressed protein
LOC_Os12g18080	turquoise	0.831211	824.285	439.796	384.489	55.3069	0.831211	0.607442	retrotransposon protein, putative, unclassified, expressed
LOC_Os05g34460	turquoise	0.58371	246.143	129.658	116.485	13.1725	0.58371	0.268287	OsDegp7 - Putative Deg protease homologue, expressed
LOC_Os04g14640	turquoise	0.617403	103.967	61.6833	42.2832	19.4001	0.617403	0.311699	retrotransposon protein, putative, unclassified, expressed
LOC_Os05g34480	turquoise	0.805034	713.376	396.85	316.526	80.3237	0.805034	0.722936	expressed protein
LOC_Os02g56970	turquoise	0.58219	118.847	56.5379	62.3088	-5.77095	0.58219	0.468523	uncharacterized protein yqjG, putative, expressed
LOC_Os10g40710	turquoise	0.437245	173.196	38.8009	134.395	-95.5939	0.437245	0.526153	expansin precursor, putative, expressed
LOC_Os08g14320	turquoise	0.845336	988.198	538.379	449.819	88.5596	0.845336	0.508531	zinc finger, C3HC4 type domain containing protein, expressed
LOC_Os02g38170	turquoise	0.901209	1079.31	721.942	357.366	364.576	0.901209	0.788183	expressed protein
LOC_Os05g47880	turquoise	0.375698	51.3465	14.9521	36.3944	-21.4424	0.375698	0.138264	hypro1, putative, expressed
LOC_Os11g34810	turquoise	0.86148	1217.98	610.455	607.527	2.92791	0.86148	0.859227	expressed protein
LOC_Os01g13000	turquoise	0.67772	239.612	122.129	117.483	4.64557	0.67772	0.581723	ethylene-responsive protein related, putative, expressed
LOC_Os08g14330	turquoise	0.960839	1602.32	1008.62	593.7	414.925	0.960839	0.774441	aldose 1-epimerase, putative, expressed
LOC_Os05g01890	turquoise	0.447439	167.091	59.974	107.117	-47.1431	0.447439	0.0660729	expressed protein
LOC_Os10g40550	turquoise	0.723372	372.779	213.691	159.087	54.6041	0.723372	0.399515	CPuORF23 - conserved peptide uORF-containing transcript, expressed
LOC_Os04g05650	turquoise	0.49489	52.8826	27.8416	25.041	2.80064	0.49489	0.50554	expressed protein
LOC_Os10g40555	turquoise	0.627457	286.241	113.179	173.063	-59.8837	0.627457	0.302532	expressed protein
LOC_Os10g40540	turquoise	0.449947	325.692	133.983	191.708	-57.7254	0.449947	0.0342878	enoyl-CoA hydratase/isomerase family protein, putative, expressed
LOC_Os03g25130	turquoise	0.764958	522.244	273.381	248.863	24.5185	0.764958	0.725851	OB-fold nucleic acid binding domain containing protein, putative, expressed
LOC_Os03g25150	turquoise	0.775983	496.173	267.804	228.368	39.4364	0.775983	0.516544	transposon protein, putative, unclassified, expressed
LOC_Os01g53330	turquoise	0.587164	204.693	90.8305	113.863	-23.0323	0.587164	0.310381	anthocyanidin 5,3-O-glucosyltransferase, putative, expressed
LOC_Os04g42740	turquoise	0.411379	36.69	15.6635	21.0265	-5.36303	0.411379	0.216508	serine/threonine-protein kinase receptor precursor, putative, expressed
LOC_Os05g31062	turquoise	0.614412	181.761	122.057	59.7033	62.354	0.614412	0.420504	DNAJ heat shock N-terminal domain-containing protein, putative, expressed
LOC_Os05g38820	turquoise	0.638891	142.288	100.041	42.2467	57.7944	0.638891	0.528654	histone-like transcription factor and archaeal histone, putative, expressed
LOC_Os08g08110	turquoise	0.986682	1893.12	1200.19	692.936	507.25	0.986682	0.751343	diacylglycerol kinase, putative, expressed
LOC_Os10g40590	turquoise	0.95348	1381.5	990.729	390.773	599.957	0.95348	0.743041	oxysterol-binding protein, putative, expressed
LOC_Os07g36330	turquoise	0.52933	91.4267	40.5157	50.911	-10.3953	0.52933	0.192108	OsFBX245 - F-box domain containing protein, expressed
LOC_Os05g38800	turquoise	0.599239	194.839	67.3302	127.509	-60.1785	0.599239	0.279227	PWWP domain containing protein, expressed
LOC_Os02g27400	turquoise	0.500144	189.874	42.7411	147.133	-104.392	0.500144	0.280044	OsFBX49 - F-box domain containing protein, expressed
LOC_Os07g09450	turquoise	0.19424	152.684	40.3973	112.287	-71.8894	0.19424	0.154253	heat shock protein DnaJ, putative, expressed
LOC_Os08g08070	turquoise	0.924177	1370.69	981.598	389.089	592.51	0.924177	0.736276	transporter family protein, putative, expressed
LOC_Os12g18110	turquoise	0.53777	138.674	52.4321	86.2423	-33.8102	0.53777	0.199092	PQ loop repeat domain containing protein, expressed
LOC_Os06g51500	turquoise	0.848466	1393.72	568.369	825.348	-256.979	0.848466	0.827006	expressed protein
LOC_Os01g13180	turquoise	0.592475	110.955	55.0318	55.9233	-0.891467	0.592475	0.402738	expressed protein
LOC_Os02g38029	turquoise	0.906662	1434.87	734.528	700.344	34.1841	0.906662	0.7612	expressed protein
LOC_Os07g09520	turquoise	0.43393	31.3791	11.7631	19.6159	-7.85282	0.43393	0.2792	expressed protein
LOC_Os03g60790	turquoise	0.654818	272.071	119.681	152.39	-32.7094	0.654818	0.587651	heat shock protein DnaJ, putative, expressed
LOC_Os02g38020	turquoise	0.811392	1045.21	415.4	629.807	-214.406	0.811392	0.776987	inorganic phosphate transporter 2-1, chloroplast precursor, putative, expressed
LOC_Os11g34980	turquoise	0.752821	532.436	278.861	253.575	25.2857	0.752821	0.709449	expressed protein
LOC_Os12g18130	turquoise	0.706652	277.853	167.696	110.157	57.5383	0.706652	0.555366	expressed protein
LOC_Os12g18120	turquoise	0.92093	1704.58	796.558	908.021	-111.463	0.92093	0.775007	zinc finger C-x8-C-x5-C-x3-H type family protein, expressed
LOC_Os01g53430	turquoise	0.564633	100.742	57.5009	43.2407	14.2601	0.564633	0.558648	anthocyanidin 5,3-O-glucosyltransferase, putative, expressed
LOC_Os02g38080	turquoise	0.867312	1026.21	537.397	488.813	48.5839	0.867312	0.644102	protein kinase domain containing protein, expressed
LOC_Os05g01780	turquoise	0.732429	592.401	256.016	336.386	-80.3702	0.732429	0.644092	STE_PAK_Ste20++TranslationKinase_Slob_Wnk.1 - STE kinases include homologs to sterile 7, sterile 11 and sterile 20 from yeast, expressed
LOC_Os09g25460	turquoise	0.819965	974.478	414.379	560.099	-145.719	0.819965	0.565933	transferase family protein, putative, expressed
LOC_Os05g34570	turquoise	0.261604	18.2827	4.37331	13.9094	-9.53606	0.261604	0.237082	pentatricopeptide, putative, expressed
LOC_Os06g51520	turquoise	0.399394	73.1184	38.1732	34.9452	3.22799	0.399394	0.353183	lysine ketoglutarate reductase trans-splicing related 1, putative, expressed
LOC_Os08g02840	turquoise	0.461638	43.0842	19.8284	23.2557	-3.42732	0.461638	0.277585	ribosome, putative, expressed
LOC_Os02g38040	turquoise	0.948652	1693.64	1029.84	663.808	366.027	0.948652	0.732698	leucine-rich repeat family protein, putative, expressed
LOC_Os04g26190	turquoise	0.896579	1107.53	728.215	379.312	348.903	0.896579	0.805232	pollen allergen, putative, expressed
LOC_Os03g17940	turquoise	0.94475	1651.44	1072.06	579.379	492.679	0.94475	0.743156	phosphatase, putative, expressed
LOC_Os01g39110	turquoise	0.762103	745.517	274.419	471.098	-196.678	0.762103	0.380333	ZOS1-10 - C2H2 zinc finger protein, expressed
LOC_Os07g05250	turquoise	0.48119	156.322	74.6496	81.6726	-7.02303	0.48119	0.545597	expressed protein
LOC_Os01g53090	turquoise	0.464841	145.502	41.4741	104.028	-62.5543	0.464841	0.0172939	pathogen-related protein, putative, expressed
LOC_Os04g14340	turquoise	0.676146	198.593	119.878	78.7151	41.163	0.676146	0.506641	retrotransposon protein, putative, unclassified, expressed
LOC_Os10g05780	turquoise	0.578421	188.18	74.6984	113.482	-38.7833	0.578421	0.472286	POT domain containing peptide transporter, putative, expressed
LOC_Os07g09384	turquoise	0.958864	1519.36	1033.11	486.258	546.849	0.958864	0.777557	expressed protein
LOC_Os05g34600	turquoise	0.606462	145.136	60.8503	84.2859	-23.4356	0.606462	0.444127	no apical meristem protein, putative, expressed
LOC_Os01g53070	turquoise	0.929633	1443.94	818.458	625.477	192.98	0.929633	0.645016	ATP binding protein, putative, expressed
LOC_Os07g05260	turquoise	0.820748	817.107	421.513	395.594	25.9186	0.820748	0.46357	expressed protein
LOC_Os01g05900	turquoise	0.574981	240.038	108.996	131.042	-22.0453	0.574981	0.616806	Core histone H2A/H2B/H3/H4 domain containing protein, putative, expressed
LOC_Os08g08420	turquoise	0.74872	398.093	205.496	192.597	12.8989	0.74872	0.60714	expressed protein
LOC_Os07g05270	turquoise	0.740231	368.203	199.64	168.563	31.0775	0.740231	0.600683	expressed protein
LOC_Os05g34640	turquoise	0.674613	320.512	160.458	160.054	0.4035	0.674613	0.702532	PHD finger protein, putative, expressed
LOC_Os01g53030	turquoise	0.93879	1563.25	893.249	669.998	223.251	0.93879	0.735444	expressed protein
LOC_Os01g53000	turquoise	0.908767	1186.69	707.612	479.082	228.53	0.908767	0.599301	trehalose synthase, putative, expressed
LOC_Os03g34300	turquoise	0.531037	82.5981	42.133	40.465	1.66797	0.531037	0.585308	TMS membrane protein/tumour differentially expressed protein, putative, expressed
LOC_Os05g31160	turquoise	0.845685	874.23	593.095	281.135	311.96	0.845685	0.694297	peptide chain release factor 2, putative, expressed
LOC_Os02g38300	turquoise	0.807376	820.813	374.795	446.018	-71.2229	0.807376	0.740376	SNF7 domain containing protein, putative, expressed
LOC_Os07g40800	turquoise	0.484208	283.819	118.648	165.171	-46.5231	0.484208	0.0873157	PPR repeat domain containing protein, putative, expressed
LOC_Os07g09370	turquoise	0.549276	225.222	72.1873	153.035	-80.8476	0.549276	0.47748	pentatricopeptide, putative, expressed
LOC_Os07g09340	turquoise	0.892141	1133.89	642.328	491.562	150.766	0.892141	0.567831	plasma membrane ATPase, putative, expressed
LOC_Os06g28340	turquoise	0.538772	153.676	63.8248	89.8508	-26.0259	0.538772	0.340704	transposon protein, putative, CACTA, En/Spm sub-class, expressed
LOC_Os08g26270	turquoise	0.428602	33.6026	16.2691	17.3335	-1.06445	0.428602	0.102374	expressed protein
LOC_Os07g36060	turquoise	0.713574	376.736	163.189	213.547	-50.3585	0.713574	0.631101	SMP-30/Gluconolaconase/LRE-like region containing protein, expressed
LOC_Os07g40890	turquoise	0.921034	1517.15	815.481	701.67	113.811	0.921034	0.802354	igA FC receptor precursor, putative, expressed
LOC_Os04g02690	turquoise	0.94642	1521.42	1003.59	517.83	485.764	0.94642	0.76225	pattern formation protein EMB30, putative, expressed
LOC_Os02g27592	turquoise	0.826108	812.784	469.51	343.273	126.237	0.826108	0.773604	expressed protein
LOC_Os05g31110	turquoise	0.811036	942.576	453.427	489.15	-35.7232	0.811036	0.402893	hexokinase, putative, expressed
LOC_Os03g17610	turquoise	0.647987	238.909	116.413	122.496	-6.08289	0.647987	0.639101	OsTOP6A3 - Topoisomerase 6 subunit A homolog 3, expressed
LOC_Os12g18210	turquoise	0.582146	183.959	57.7236	126.235	-68.5113	0.582146	0.662079	cysteine protease, putative, expressed
LOC_Os01g05970	turquoise	0.706864	400.427	191.058	209.369	-18.3115	0.706864	0.577786	OsFBO1 - F-box and other domain containing protein, expressed
LOC_Os01g13270	turquoise	0.827609	860.675	682.393	178.281	504.112	0.827609	0.636991	AGC_PVPK_like_kin82y.4 - ACG kinases include homologs to PKA, PKG and PKC, expressed
LOC_Os03g60470	turquoise	0.86784	1004.39	786.937	217.451	569.486	0.86784	0.711228	glycine-rich protein A3, putative, expressed
LOC_Os06g35970	turquoise	0.832004	735.783	471.009	264.774	206.235	0.832004	0.833542	meiosis 5, putative, expressed
LOC_Os08g37940	turquoise	0.302767	39.6606	9.3135	30.3471	-21.0336	0.302767	0.142394	HAD-superfamily hydrolase subfamily IA, variant 3, putative, expressed
LOC_Os11g44014	turquoise	0.521865	50.9377	28.2626	22.6751	5.58746	0.521865	0.34196	retrotransposon protein, putative, unclassified, expressed
LOC_Os10g40920	turquoise	0.229455	81.3628	9.56887	71.7939	-62.225	0.229455	0.215874	pentatricopeptide, putative, expressed
LOC_Os10g11340	turquoise	0.755677	568.714	289.633	279.081	10.5517	0.755677	0.612996	nitroreductase family protein, putative, expressed
LOC_Os10g40950	turquoise	0.726468	562.202	341.113	221.089	120.024	0.726468	0.701116	polyol transporter 5, putative, expressed
LOC_Os02g56770	turquoise	0.364316	121.401	22.1884	99.2131	-77.0248	0.364316	0.618403	OsFBX67 - F-box domain containing protein, expressed
LOC_Os04g42930	turquoise	0.836269	1202.66	507.069	695.591	-188.521	0.836269	0.894207	OsGrx_C2.2 - glutaredoxin subgroup I, expressed
LOC_Os05g34720	turquoise	0.744218	673.632	297.201	376.431	-79.2302	0.744218	0.839519	transcriptional regulator, putative, expressed
LOC_Os05g47950	turquoise	0.870862	1059.96	588.558	471.399	117.159	0.870862	0.786588	UDP-glucoronosyl and UDP-glucosyl transferase domain containing protein, expressed
LOC_Os01g13310	turquoise	0.414532	317.852	123.069	194.783	-71.7144	0.414532	0.050074	DNA topoisomerase 2, putative, expressed
LOC_Os07g05120	turquoise	0.746665	298.025	200.63	97.3946	103.235	0.746665	0.442252	expressed protein
LOC_Os04g42960	turquoise	0.952449	1536.44	1102.4	434.045	668.353	0.952449	0.751054	Lung seven transmembrane receptor domain containing protein, putative, expressed
LOC_Os04g09780	turquoise	0.33483	17.6603	3.54477	14.1156	-10.5708	0.33483	0.178058	cysteine-rich receptor protein kinase, putative, expressed
LOC_Os04g42900	turquoise	0.852305	1406.19	559.405	846.784	-287.379	0.852305	0.609304	expressed protein
LOC_Os04g42910	turquoise	0.918947	1291.62	790.52	501.1	289.42	0.918947	0.723883	expressed protein
LOC_Os10g11190	turquoise	0.500348	69.7724	27.8755	41.8969	-14.0215	0.500348	0.285827	retrotransposon protein, putative, Ty3-gypsy subclass, expressed
LOC_Os01g18880	turquoise	0.791767	497.082	324.391	172.69	151.701	0.791767	0.528194	ubiquitin carboxyl-terminal hydrolase, family 1, putative, expressed
LOC_Os01g53130	turquoise	0.898028	1102.04	806.483	295.553	510.931	0.898028	0.737552	zinc finger, C3HC4 type domain containing protein, expressed
LOC_Os05g31290	turquoise	0.814351	842.064	465.242	376.822	88.42	0.814351	0.595401	acyl carrier protein, putative, expressed
LOC_Os04g05450	turquoise	0.45098	168.888	48.3302	120.558	-72.2274	0.45098	0.473818	retrotransposon protein, putative, unclassified, expressed
LOC_Os04g02880	turquoise	0.503687	93.9366	33.0165	60.9201	-27.9036	0.503687	0.407492	expressed protein
LOC_Os06g16000	turquoise	0.506259	114.314	46.3742	67.9398	-21.5655	0.506259	0.111976	UDP-glucoronosyl and UDP-glucosyl transferase, putative, expressed
LOC_Os03g17770	turquoise	0.264677	34.8526	9.58265	25.2699	-15.6873	0.264677	0.317332	expressed protein
LOC_Os02g38200	turquoise	0.968511	1828.2	1023.3	804.905	218.39	0.968511	0.741042	dehydrogenase, putative, expressed
LOC_Os02g38220	turquoise	0.881468	894.338	561.505	332.833	228.672	0.881468	0.615283	eukaryotic translation initiation factor 4B, putative, expressed
LOC_Os05g01590	turquoise	0.642786	306.061	166.782	139.278	27.5039	0.642786	0.346339	heat shock protein DnaJ, putative, expressed
LOC_Os03g60530	turquoise	0.625451	155.663	90.1078	65.5549	24.5529	0.625451	0.313019	ras-related protein, putative, expressed
LOC_Os02g27674	turquoise	0.516203	76.9138	27.5475	49.3663	-21.8188	0.516203	0.246328	expressed protein
LOC_Os02g56800	turquoise	0.460988	151.217	46.5542	104.663	-58.1089	0.460988	0.610416	F-box protein PP2-B2, putative, expressed
LOC_Os03g17740	turquoise	0.668512	235.107	108.756	126.351	-17.595	0.668512	0.592527	transporter, putative, expressed
LOC_Os01g05830	turquoise	0.753973	552.009	270.276	281.733	-11.4567	0.753973	0.588453	expressed protein
LOC_Os01g05820	turquoise	0.789161	515.156	330.475	184.681	145.794	0.789161	0.492392	gamma-glutamyltranspeptidase 1 precursor, putative, expressed
LOC_Os01g13370	turquoise	0.791099	721.995	576.773	145.222	431.552	0.791099	0.611494	seven in absentia protein family domain containing protein, expressed
LOC_Os05g34790	turquoise	0.459374	69.1022	15.7384	53.3638	-37.6254	0.459374	0.261752	GYF domain containing protein, putative, expressed
LOC_Os01g05870	turquoise	0.752779	524.294	232.749	291.545	-58.7961	0.752779	0.51496	receptor kinase, putative, expressed
LOC_Os10g40820	turquoise	0.817423	812.606	396.466	416.14	-19.6735	0.817423	0.571107	expressed protein
LOC_Os10g40824	turquoise	0.710462	558.612	225.875	332.737	-106.862	0.710462	0.794163	expressed protein
LOC_Os10g05900	turquoise	0.925845	1298.83	844.582	454.245	390.337	0.925845	0.741581	expressed protein
LOC_Os05g47980	turquoise	0.898923	1169.91	693.177	476.731	216.446	0.898923	0.628006	ATP synthase, putative, expressed
LOC_Os07g05440	turquoise	0.442586	195.951	43.541	152.41	-108.869	0.442586	0.175102	retrotransposon protein, putative, unclassified, expressed
LOC_Os07g05430	turquoise	0.791094	770.604	366.719	403.886	-37.1672	0.791094	0.557359	retrotransposon protein, putative, unclassified, expressed
LOC_Os03g17450	turquoise	0.771929	672.414	375.782	296.632	79.1498	0.771929	0.372061	nucleotide binding protein, putative, expressed
LOC_Os03g17440	turquoise	0.59515	123.181	95.9528	27.2286	68.7243	0.59515	0.299988	expressed protein
LOC_Os01g25110	turquoise	0.171498	16.6291	3.04162	13.5875	-10.5459	0.171498	0.208505	clathrin adaptor complex small chain domain containing protein, expressed
LOC_Os03g05049	turquoise	0.53943	82.6379	45.4087	37.2293	8.17938	0.53943	0.326363	expressed protein
LOC_Os04g42420	turquoise	0.826947	1074.51	401.83	672.678	-270.848	0.826947	0.565612	nodulin, putative, expressed
LOC_Os11g39350	turquoise	0.666222	183.408	116.744	66.6634	50.0809	0.666222	0.423716	expressed protein
LOC_Os07g36690	turquoise	0.662064	348.517	152.437	196.08	-43.6426	0.662064	0.603559	CSLF2 - cellulose synthase-like family F; beta1,3;1,4 glucan synthase, expressed
LOC_Os11g39360	turquoise	0.459443	67.1058	26.5245	40.5813	-14.0567	0.459443	0.296147	pentatricopeptide repeat domain containing protein, putative, expressed
LOC_Os03g25480	turquoise	0.725547	485.311	214.924	270.387	-55.4635	0.725547	0.255835	cytochrome P450, putative, expressed
LOC_Os10g05520	turquoise	0.524359	160.898	65.2622	95.6354	-30.3732	0.524359	0.163995	OsFBX371 - F-box domain containing protein, expressed
LOC_Os06g23390	turquoise	0.725712	305.631	244.777	60.854	183.923	0.725712	0.55453	IQ calmodulin-binding motif family protein, putative, expressed
LOC_Os03g58920	turquoise	0.930633	1271.12	805.232	465.889	339.342	0.930633	0.693829	galactosyltransferase family protein, putative, expressed
LOC_Os03g25460	turquoise	0.871601	1121.5	824.176	297.323	526.853	0.871601	0.697931	OsRCI2-4 - Putative low temperature and salt responsive protein, expressed
LOC_Os06g28970	turquoise	0.541718	344.872	138.873	205.999	-67.126	0.541718	0.20889	bolA, putative, expressed
LOC_Os09g31390	turquoise	0.882661	1175.62	600.507	575.113	25.3941	0.882661	0.680545	transcription factor, putative, expressed
LOC_Os03g21250	turquoise	0.952139	1349.43	911.559	437.869	473.69	0.952139	0.713709	glycosyl transferase, family 8, putative, expressed
LOC_Os11g27730	turquoise	0.336829	76.2886	15.8844	60.4042	-44.5198	0.336829	0.0641557	cytochrome P450, putative, expressed
LOC_Os10g05540	turquoise	0.808607	930.917	474.609	456.307	18.3023	0.808607	0.660851	OsFBX373 - F-box domain containing protein, expressed
LOC_Os05g38490	turquoise	0.696806	468.432	200.204	268.228	-68.024	0.696806	0.365458	growth regulator related protein, putative, expressed
LOC_Os11g31400	turquoise	0.845447	927.857	731.364	196.494	534.87	0.845447	0.681254	expressed protein
LOC_Os10g23230	turquoise	0.321893	49.1845	7.08028	42.1042	-35.0239	0.321893	0.265869	AT hook-containing MAR binding 1, putative, expressed
LOC_Os02g34030	turquoise	0.702624	474.489	232.163	242.326	-10.1629	0.702624	0.350413	retrotransposon protein, putative, unclassified, expressed
LOC_Os08g37720	turquoise	0.623136	161.709	80.3347	81.3746	-1.03993	0.623136	0.225532	expressed protein
LOC_Os10g23220	turquoise	0.568294	224.261	89.6037	134.658	-45.0539	0.568294	0.154929	GIL1, putative, expressed
LOC_Os03g21190	turquoise	0.481719	47.3161	19.7268	27.5893	-7.86252	0.481719	0.512182	retrotransposon protein, putative, unclassified, expressed
LOC_Os10g23204	turquoise	0.823956	695.399	405.879	289.52	116.359	0.823956	0.552426	CutA, chloroplast precursor, putative, expressed
LOC_Os05g47446	turquoise	0.721418	395.814	232.64	163.173	69.4671	0.721418	0.810322	expressed protein
LOC_Os05g47442	turquoise	0.774622	666.39	303.783	362.607	-58.8239	0.774622	0.666409	expressed protein
LOC_Os04g42470	turquoise	0.792815	859.075	348.403	510.672	-162.269	0.792815	0.529196	regulatory subunit, putative, expressed
LOC_Os01g49120	turquoise	0.441791	150.517	36.3483	114.169	-77.8206	0.441791	0.0386864	MATE efflux family protein, putative, expressed
LOC_Os04g42451	turquoise	0.448376	33.9407	10.3206	23.62	-13.2994	0.448376	0.268577	expressed protein
LOC_Os02g27790	turquoise	0.779191	663.824	316.729	347.095	-30.3657	0.779191	0.847915	splicing factor 3B subunit 1, putative, expressed
LOC_Os07g13160	turquoise	0.90812	1489.57	728.633	760.934	-32.3013	0.90812	0.655451	expressed protein
LOC_Os10g11980	turquoise	0.844476	826.211	451.916	374.295	77.6206	0.844476	0.710016	transferase family protein, putative, expressed
LOC_Os01g49130	turquoise	0.493493	62.7695	22.2227	40.5467	-18.324	0.493493	0.62428	retrotransposon protein, putative, unclassified, expressed
LOC_Os07g13170	turquoise	0.707286	547.81	183.776	364.034	-180.258	0.707286	0.459549	AP2 domain containing protein, expressed
LOC_Os05g47470	turquoise	0.491006	282.699	103.84	178.859	-75.0193	0.491006	0.278315	VIP1 protein, putative, expressed
LOC_Os05g34010	turquoise	0.724157	310.876	167.361	143.515	23.8465	0.724157	0.576675	peptide transporter PTR2, putative, expressed
LOC_Os01g49150	turquoise	0.612432	442.641	192.771	249.869	-57.0976	0.612432	0.202434	anti-silencing protein, ASF1-like domain containing protein, expressed
LOC_Os11g11710	turquoise	0.96783	1771.4	1151.65	619.751	531.896	0.96783	0.804278	expressed protein
LOC_Os01g49160	turquoise	0.876741	1103.3	575.689	527.614	48.0751	0.876741	0.588762	MYB family transcription factor, putative, expressed
LOC_Os05g01490	turquoise	0.809122	613.931	394.353	219.578	174.775	0.809122	0.716516	ras-related protein, putative, expressed
LOC_Os03g13984	turquoise	0.390823	166.675	38.4885	128.187	-89.6981	0.390823	0.57407	expressed protein
LOC_Os05g01480	turquoise	0.918449	1355.65	765.334	590.314	175.02	0.918449	0.711915	ras-related protein, putative, expressed
LOC_Os08g22210	turquoise	0.593855	260.59	106.89	153.7	-46.8101	0.593855	0.441065	retrotransposon protein, putative, unclassified
LOC_Os11g11730	turquoise	0.97236	1790.39	1163.29	627.094	536.199	0.97236	0.801466	cell wall adhesin, putative, expressed
LOC_Os09g20910	turquoise	0.789826	531.99	311.233	220.757	90.4752	0.789826	0.455429	expressed protein
LOC_Os11g27810	turquoise	0.526421	107.481	64.8254	42.6557	22.1697	0.526421	0.377719	retrotransposon protein, putative, unclassified, expressed
LOC_Os03g17590	turquoise	0.923616	1345.57	779.06	566.506	212.554	0.923616	0.622589	cat eye syndrome critical region protein 5 precursor, putative, expressed
LOC_Os12g18630	turquoise	0.925143	1150.28	778.748	371.537	407.212	0.925143	0.538981	expressed protein
LOC_Os03g05110	turquoise	0.577272	132.466	60.557	71.9086	-11.3516	0.577272	0.325831	xyloglucan galactosyltransferase KATAMARI1, putative, expressed
LOC_Os03g25530	turquoise	0.85977	1052.9	561.945	490.958	70.9872	0.85977	0.771607	expressed protein
LOC_Os09g17630	turquoise	0.471313	70.923	25.7713	45.1517	-19.3805	0.471313	0.097368	receptor-like protein kinase 2, putative, expressed
LOC_Os03g05160	turquoise	0.394347	34.6674	11.8345	22.8329	-10.9984	0.394347	0.414512	GATA zinc finger domain containing protein, expressed
LOC_Os07g44610	turquoise	0.9116	1544.31	740.475	803.839	-63.364	0.9116	0.756178	pyrrolidone-carboxylate peptidase, putative, expressed
LOC_Os12g18650	turquoise	0.140215	113.331	25.1436	88.1872	-63.0436	0.140215	0.195145	Regulator of chromosome condensation domain containing protein, expressed
LOC_Os02g27870	turquoise	0.708656	337.489	172.349	165.14	7.20914	0.708656	0.461846	expressed protein
LOC_Os04g42310	turquoise	0.504067	86.7739	36.5585	50.2154	-13.657	0.504067	0.235806	B4-BTB3 - Bric-a-Brac, Tramtrack, Broad Complex BTB domain with B4 subfamily conserved sequence, expressed
LOC_Os07g36700	turquoise	0.530902	204.281	72.4096	131.872	-59.4623	0.530902	0.513524	CSLF1 - cellulose synthase-like family F; beta1,3;1,4 glucan synthase, expressed
LOC_Os07g05380	turquoise	0.713625	275.142	142.514	132.629	9.88516	0.713625	0.654892	ATPase BadF/BadG/BcrA/BcrD type, putative, expressed
LOC_Os09g20970	turquoise	0.661279	341.716	139.677	202.039	-62.3617	0.661279	0.800897	receptor kinase, putative, expressed
LOC_Os01g18630	turquoise	0.816608	920.943	403.237	517.706	-114.469	0.816608	0.729157	aspartic proteinase oryzasin-1 precursor, putative, expressed
LOC_Os03g21100	turquoise	0.895125	1101.34	838.993	262.349	576.644	0.895125	0.688683	transposon protein, putative, CACTA, En/Spm sub-class, expressed
LOC_Os07g36720	turquoise	0.468633	57.6483	25.2668	32.3814	-7.11463	0.468633	0.33997	retrotransposon protein, putative, unclassified, expressed
LOC_Os03g21120	turquoise	0.950241	1373.18	890.551	482.633	407.919	0.950241	0.660133	nucleoside-triphosphatase, putative, expressed
LOC_Os02g27810	turquoise	0.597991	349.695	174.252	175.443	-1.19097	0.597991	0.300238	MazG nucleotide pyrophosphohydrolase domain containing protein, expressed
LOC_Os09g17680	turquoise	0.738935	392.799	248.4	144.399	104	0.738935	0.475762	NAD kinase, putative, expressed
LOC_Os07g40100	turquoise	0.965279	1795.94	1112.26	683.682	428.579	0.965279	0.806552	POEI22 - Pollen Ole e I allergen and extensin family protein precursor, expressed
LOC_Os03g60380	turquoise	0.889519	1387.38	672.727	714.654	-41.9274	0.889519	0.81409	cinnamoyl CoA reductase, putative, expressed
LOC_Os02g34150	turquoise	0.42334	36.344	17.9466	18.3974	-0.450821	0.42334	0.189119	hypothetical protein
LOC_Os02g34180	turquoise	0.552618	72.9113	46.2937	26.6176	19.676	0.552618	0.483084	transposon protein, putative, unclassified, expressed
LOC_Os08g37650	turquoise	0.869123	1046.2	636.114	410.084	226.03	0.869123	0.721817	expressed protein
LOC_Os05g38360	turquoise	0.614858	294.868	215.366	79.5015	135.865	0.614858	0.461205	DHHC zinc finger domain containing protein, expressed
LOC_Os12g41140	turquoise	0.595321	283.737	115.917	167.82	-51.903	0.595321	0.721498	expressed protein
LOC_Os07g40160	turquoise	0.452177	40.004	13.0441	26.9599	-13.9158	0.452177	0.466204	expressed protein
LOC_Os03g21090	turquoise	0.762011	561.329	256.637	304.692	-48.0556	0.762011	0.552248	auxin-independent growth promoter protein, putative, expressed
LOC_Os10g05720	turquoise	0.470003	115.737	49.8878	65.8495	-15.9617	0.470003	0.560247	LTPL37 - Protease inhibitor/seed storage/LTP family protein precursor, expressed
LOC_Os07g40150	turquoise	0.552383	208.211	75.4847	132.727	-57.242	0.552383	0.0598444	expressed protein
LOC_Os12g41170	turquoise	0.966161	1541.2	996.856	544.342	452.514	0.966161	0.620239	SEY1, putative, expressed
LOC_Os07g13280	turquoise	0.673343	303.102	140.77	162.333	-21.5632	0.673343	0.181536	RNA recognition motif containing protein, putative, expressed
LOC_Os04g42340	turquoise	0.789744	895.434	377.677	517.757	-140.08	0.789744	0.690103	expressed protein
LOC_Os02g38470	turquoise	0.480935	61.9882	26.5174	35.4708	-8.95346	0.480935	0.19935	B3 DNA binding domain containing protein, expressed
LOC_Os09g25070	turquoise	0.552901	223.559	67.0571	156.502	-89.4447	0.552901	0.869339	WRKY62, expressed
LOC_Os04g42350	turquoise	0.873359	1000.67	780.94	219.726	561.214	0.873359	0.648816	heavy metal-associated domain containing protein, expressed
LOC_Os04g42360	turquoise	0.414007	148.053	58.9005	89.1527	-30.2522	0.414007	0.0553097	expressed protein
LOC_Os09g25060	turquoise	0.616163	380.165	123.046	257.119	-134.074	0.616163	0.776338	WRKY76, expressed
LOC_Os05g34150	turquoise	0.52664	97.381	44.3495	53.0315	-8.68207	0.52664	0.134715	glutathione S-transferase, putative, expressed
LOC_Os01g49024	turquoise	0.93572	1556.33	848.924	707.402	141.522	0.93572	0.605467	phosphatidylserine synthase, putative, expressed
LOC_Os05g31430	turquoise	0.793681	548.414	384.504	163.91	220.595	0.793681	0.594624	retrotransposon protein, putative, Ty3-gypsy subclass, expressed
LOC_Os01g49020	turquoise	0.848376	789.276	485.443	303.833	181.61	0.848376	0.418265	expressed protein
LOC_Os04g42399	turquoise	0.431283	48.1188	14.6371	33.4817	-18.8446	0.431283	0.285902	retrotransposon protein, putative, Ty1-copia subclass, expressed
LOC_Os03g17540	turquoise	0.743963	520.196	234.483	285.713	-51.2305	0.743963	0.52719	TBC domain containing protein, expressed
LOC_Os03g17270	turquoise	0.963305	1505.7	1132.57	373.132	759.436	0.963305	0.714372	expressed protein
LOC_Os07g36430	turquoise	0.904665	1342.8	657.224	685.573	-28.3494	0.904665	0.761017	expressed protein
LOC_Os04g42670	turquoise	0.676152	540.893	215.143	325.75	-110.608	0.676152	0.584519	OsFBL19 - F-box domain and LRR containing protein, expressed
LOC_Os09g17720	turquoise	0.710045	320.942	171.287	149.655	21.6321	0.710045	0.474255	retrotransposon protein, putative, unclassified, expressed
LOC_Os03g17250	turquoise	0.958806	1720.42	1069.19	651.232	417.955	0.958806	0.768946	ankyrin repeat-containing protein, putative, expressed
LOC_Os03g58710	turquoise	0.569738	317.745	81.4552	236.29	-154.835	0.569738	0.606943	riboflavin biosynthesis protein-related, putative, expressed
LOC_Os03g17230	turquoise	0.976058	1950.75	1110.07	840.675	269.398	0.976058	0.769765	NAD dependent epimerase/dehydratase family domain containing protein, expressed
LOC_Os07g05680	turquoise	0.487203	303.208	86.1132	217.095	-130.982	0.487203	0.202455	expressed protein
LOC_Os06g04210	turquoise	0.835326	915.478	480.526	434.953	45.573	0.835326	0.713692	expressed protein
LOC_Os06g04200	turquoise	0.96159	1655.43	1036.39	619.037	417.353	0.96159	0.712523	starch synthase, putative, expressed
LOC_Os09g31120	turquoise	0.71801	337.593	215.647	121.946	93.7001	0.71801	0.584919	pirin, putative, expressed
LOC_Os07g44700	turquoise	0.959154	1433.61	1053.18	380.432	672.75	0.959154	0.759222	expressed protein
LOC_Os05g38740	turquoise	0.311341	46.2756	10.1332	36.1423	-26.0091	0.311341	0.204271	Core histone H2A/H2B/H3/H4 domain containing protein, putative, expressed
LOC_Os04g14790	turquoise	0.853204	851.346	520.115	331.231	188.884	0.853204	0.777682	FAD dependent oxidoreductase domain containing protein, expressed
LOC_Os07g48830	turquoise	0.481768	82.5579	28.4377	54.1202	-25.6825	0.481768	0.326104	glycosyl transferase 8 domain containing protein, putative, expressed
LOC_Os02g27920	turquoise	0.495281	184.552	53.9351	130.617	-76.6823	0.495281	0.704573	retrotransposon protein, putative, unclassified
LOC_Os09g31140	turquoise	0.678926	241.181	114.312	126.869	-12.5572	0.678926	0.448743	ZOS9-16 - C2H2 zinc finger protein, expressed
LOC_Os08g14180	turquoise	0.823843	809.434	605.903	203.531	402.373	0.823843	0.754372	flavonol sulfotransferase, putative, expressed
LOC_Os03g25270	turquoise	0.800455	704.756	360.051	344.705	15.3469	0.800455	0.622067	pyrrolidone-carboxylate peptidase, putative, expressed
LOC_Os06g35590	turquoise	0.94903	1538.68	984.423	554.257	430.166	0.94903	0.759013	reticuline oxidase-like protein precursor, putative, expressed
LOC_Os05g38770	turquoise	0.946442	1428.92	1048.74	380.177	668.561	0.946442	0.760154	protein kinase APK1B, chloroplast precursor, putative, expressed
LOC_Os09g20870	turquoise	0.609764	220.178	90.1388	130.039	-39.9006	0.609764	0.26531	expressed protein
LOC_Os05g38790	turquoise	0.873071	1069.42	810.613	258.806	551.807	0.873071	0.693644	IQ calmodulin-binding motif domain containing protein, expressed
LOC_Os09g20880	turquoise	0.866005	844.938	607.748	237.19	370.559	0.866005	0.830086	serine/threonine-protein kinase, putative, expressed
LOC_Os01g18280	turquoise	0.331423	15.6243	5.93947	9.68481	-3.74534	0.331423	0.377675	SNF7 domain containing protein, putative, expressed
LOC_Os01g49300	turquoise	0.771497	706.61	342.095	364.514	-22.4191	0.771497	0.419053	retrotransposon protein, putative, unclassified, expressed
LOC_Os07g15970	turquoise	0.616745	155.369	92.0466	63.3225	28.724	0.616745	0.472642	erythronate-4-phosphate dehydrogenase domain containing protein, expressed
LOC_Os01g49310	turquoise	0.387506	115.732	29.9269	85.8055	-55.8785	0.387506	0.0949261	expressed protein
LOC_Os10g09860	turquoise	0.472733	70.5805	19.9522	50.6283	-30.6761	0.472733	0.604611	chalcone synthase, putative, expressed
LOC_Os07g15959	turquoise	0.571651	76.2112	44.5235	31.6877	12.8358	0.571651	0.512422	expressed protein
LOC_Os07g01140	turquoise	0.6755	248.843	131.116	117.727	13.3886	0.6755	0.627538	MBTB12 - Bric-a-Brac, Tramtrack, Broad Complex BTB domain with Meprin and TRAF Homology MATH domain, expressed
LOC_Os10g09850	turquoise	0.720664	384.397	173.735	210.662	-36.9266	0.720664	0.655799	EF hand family protein, putative, expressed
LOC_Os07g01150	turquoise	0.97859	1704.97	1168.15	536.819	631.336	0.97859	0.729002	fatty acid hydroxylase, putative, expressed
LOC_Os11g31650	turquoise	0.528467	233.037	74.4052	158.632	-84.2268	0.528467	0.0405498	expressed protein
LOC_Os06g35524	turquoise	0.879579	813.862	601.384	212.478	388.906	0.879579	0.647542	expressed protein
LOC_Os07g09814	turquoise	0.836784	891.756	496.494	395.262	101.231	0.836784	0.417659	OsFBX221 - F-box domain containing protein, expressed
LOC_Os06g35550	turquoise	0.559227	345.34	115.645	229.694	-114.049	0.559227	0.192651	retrotransposon protein, putative, Ty1-copia subclass, expressed
LOC_Os01g18210	turquoise	0.57273	118.201	51.3527	66.8482	-15.4956	0.57273	0.330766	peptidyl-prolyl cis-trans isomerase, putative, expressed
LOC_Os06g35540	turquoise	0.896737	1295.3	708.942	586.355	122.586	0.896737	0.639911	aminotransferase, classes I and II, domain containing protein, expressed
LOC_Os10g35000	turquoise	0.571999	82.1422	49.3989	32.7433	16.6557	0.571999	0.604332	G-patch domain containing protein, expressed
LOC_Os05g01230	turquoise	0.398359	131.489	42.753	88.7355	-45.9825	0.398359	0.079608	zinc finger, C3HC4 type domain containing protein, expressed
LOC_Os08g37570	turquoise	0.926613	1306.62	978.024	328.595	649.429	0.926613	0.683742	spotted leaf 11, putative, expressed
LOC_Os07g36470	turquoise	0.577071	214.966	95.2858	119.68	-24.394	0.577071	0.502681	vacuolar ATP synthase subunit H, putative, expressed
LOC_Os10g11750	turquoise	0.680547	385.492	295.663	89.8289	205.834	0.680547	0.54593	LTPL89 - Protease inhibitor/seed storage/LTP family protein precursor, expressed
LOC_Os03g58690	turquoise	0.585644	424.852	171.65	253.201	-81.5511	0.585644	0.281457	expressed protein
LOC_Os07g05600	turquoise	0.926673	1374.99	923.991	450.999	472.992	0.926673	0.711529	retrotransposon protein, putative, unclassified, expressed
LOC_Os11g11990	turquoise	0.441354	104.369	31.7921	72.5771	-40.785	0.441354	0.125564	NB-ARC domain containing protein, expressed
LOC_Os05g01262	turquoise	0.291861	104.886	23.4212	81.4646	-58.0433	0.291861	0.161459	translocon-associated protein beta domain containing protein, expressed
LOC_Os12g33100	turquoise	0.716344	328.715	219.177	109.538	109.639	0.716344	0.415847	guanylate kinase, putative, expressed
LOC_Os07g44650	turquoise	0.76184	520.55	293.387	227.163	66.2246	0.76184	0.480583	LYR motif containing protein, putative, expressed
LOC_Os10g05490	turquoise	0.579071	74.4398	41.0272	33.4127	7.6145	0.579071	0.416893	cytochrome P450, putative, expressed
LOC_Os12g33090	turquoise	0.539517	133.771	46.3395	87.4317	-41.0922	0.539517	0.262719	zinc finger family protein, putative, expressed
LOC_Os07g09690	turquoise	0.873723	924.761	614.117	310.644	303.473	0.873723	0.632833	galactosyltransferase family protein, putative, expressed
LOC_Os12g33070	turquoise	0.904586	1562.66	764.326	798.334	-34.0082	0.904586	0.867142	myb-like DNA-binding domain containing protein, putative, expressed
LOC_Os09g17840	turquoise	0.867312	1187.82	563.928	623.891	-59.963	0.867312	0.558357	protein transport protein Sec61 subunit alpha, putative, expressed
LOC_Os07g36544	turquoise	0.712118	354.916	164.616	190.299	-25.6831	0.712118	0.589801	serine/threonine-protein kinase receptor precursor, putative, expressed
LOC_Os03g17330	turquoise	0.597361	225.228	105.513	119.715	-14.2016	0.597361	0.260744	expressed protein
LOC_Os07g05550	turquoise	0.694188	256.033	129.1	126.933	2.16698	0.694188	0.570045	expressed protein
LOC_Os01g49190	turquoise	0.969716	1775.37	1068.19	707.18	361.008	0.969716	0.796191	ATP synthase, putative, expressed
LOC_Os09g17810	turquoise	0.726746	267.998	174.073	93.9246	80.1484	0.726746	0.344194	leucine zipper protein-like, putative, expressed
LOC_Os04g42520	turquoise	0.675478	343.646	146.858	196.787	-49.9288	0.675478	0.403166	phosphoribosyl transferase, putative, expressed
LOC_Os03g58620	turquoise	0.533103	159.326	54.3017	105.024	-50.7224	0.533103	0.237135	small multi-drug export protein, putative, expressed
LOC_Os07g05570	turquoise	0.513877	145.057	45.0503	100.007	-54.957	0.513877	0.363718	ERD4 protein, putative, expressed
LOC_Os07g44840	turquoise	0.837335	1022.94	533.921	489.015	44.9063	0.837335	0.451477	bacterial transferase hexapeptide domain containing protein, expressed
LOC_Os07g05560	turquoise	0.687069	456.42	160.544	295.876	-135.332	0.687069	0.561747	expressed protein
LOC_Os03g25390	turquoise	0.638241	284.198	125.774	158.424	-32.6499	0.638241	0.23658	novel plant SNARE 11, putative, expressed
LOC_Os09g31040	turquoise	0.574438	107.194	56.7365	50.4573	6.2792	0.574438	0.588302	EF hand family protein, putative, expressed
LOC_Os09g13410	turquoise	0.585337	172.365	86.8221	85.5427	1.27938	0.585337	0.532235	plant protein of unknown function domain containing protein, expressed
LOC_Os07g44800	turquoise	0.602806	205.986	99.429	106.557	-7.12822	0.602806	0.408114	SWI/SNF-related matrix-associated actin-dependent regulator of chromatin subfamily A, putative, expressed
LOC_Os07g01200	turquoise	0.942996	1378.45	869.004	509.443	359.561	0.942996	0.70715	tetraacyldisaccharide 4-kinase, putative, expressed
LOC_Os05g38610	turquoise	0.278686	169.931	25.2032	144.728	-119.524	0.278686	0.121048	clathrin adaptor complex small chain domain containing protein, expressed
LOC_Os09g31090	turquoise	0.689561	401.895	158.259	243.636	-85.3768	0.689561	0.719364	HECT-domain domain containing protein, expressed
LOC_Os09g31080	turquoise	0.843396	912.372	454.844	457.528	-2.68363	0.843396	0.736392	induced stolen tip protein TUB8, putative, expressed
LOC_Os07g48910	turquoise	0.698501	462.736	262.407	200.329	62.0781	0.698501	0.779874	retrotransposon protein, putative, unclassified, expressed
LOC_Os04g44930	turquoise	0.66521	520.659	220.048	300.61	-80.5621	0.66521	0.74581	expressed protein
LOC_Os05g38590	turquoise	0.713074	314.795	186.056	128.739	57.3168	0.713074	0.428857	expressed protein
LOC_Os07g01260	turquoise	0.911504	1185.54	899.759	285.781	613.978	0.911504	0.680792	la domain containing protein, expressed
LOC_Os04g14730	turquoise	0.543851	117.638	46.2147	71.423	-25.2083	0.543851	0.713117	expressed protein
LOC_Os07g13090	turquoise	0.433138	55.0004	18.9168	36.0837	-17.1669	0.433138	0.440701	expressed protein
LOC_Os03g60100	turquoise	0.814352	850.514	378.697	471.817	-93.1205	0.814352	0.782411	50S ribosomal protein L17, putative, expressed
LOC_Os05g38580	turquoise	0.556053	413.714	139.311	274.403	-135.092	0.556053	0.1954	50S ribosomal protein L17, putative, expressed
LOC_Os03g60130	turquoise	0.536559	64.1949	34.4663	29.7286	4.73774	0.536559	0.253248	transcription elongation factor protein, putative, expressed
LOC_Os05g47510	turquoise	0.448937	121.865	40.7932	81.0714	-40.2782	0.448937	0.347684	pentatricopeptide, putative, expressed
LOC_Os11g31540	turquoise	0.699237	390.31	169.576	220.734	-51.1585	0.699237	0.810433	BRASSINOSTEROID INSENSITIVE 1-associated receptor kinase 1 precursor, putative, expressed
LOC_Os01g18360	turquoise	0.757303	455.914	216.278	239.635	-23.3567	0.757303	0.575982	OsIAA4 - Auxin-responsive Aux/IAA gene family member, expressed
LOC_Os06g04070	turquoise	0.882166	1272.22	725.359	546.862	178.497	0.882166	0.772223	pyridoxal-dependent decarboxylase protein, putative, expressed
LOC_Os12g33020	turquoise	0.866473	927.077	610.363	316.714	293.649	0.866473	0.65275	mitochondrial import inner membrane translocase subunit Tim17, putative, expressed
LOC_Os06g04090	turquoise	0.947687	1743.86	985.866	757.999	227.867	0.947687	0.882781	no apical meristem protein, putative, expressed
LOC_Os03g58540	turquoise	0.795381	852.753	399.756	452.997	-53.2405	0.795381	0.796269	spo0B-associated GTP-binding protein, putative, expressed
LOC_Os06g04030	turquoise	0.74102	406.069	251.624	154.445	97.1789	0.74102	0.716608	histone H3, putative, expressed
LOC_Os03g13830	turquoise	0.808651	570.034	345.876	224.158	121.717	0.808651	0.433148	pentatricopeptide, putative, expressed
LOC_Os04g42590	turquoise	0.537676	85.5214	40.465	45.0564	-4.59137	0.537676	0.562061	expressed protein
LOC_Os01g49230	turquoise	0.798262	757.63	345.249	412.381	-67.1325	0.798262	0.560005	limonoid UDP-glucosyltransferase, putative, expressed
LOC_Os01g06540	turquoise	0.535211	55.4675	34.2719	21.1956	13.0762	0.535211	0.266187	PHD finger protein, putative, expressed
LOC_Os05g39270	turquoise	0.22477	26.6873	6.30772	20.3796	-14.0719	0.22477	0.0135906	retrotransposon protein, putative, Ty3-gypsy subclass, expressed
LOC_Os08g03390	turquoise	0.656037	307.001	126.753	180.248	-53.4942	0.656037	0.207728	pre-mRNA-splicing factor SLU7, putative, expressed
LOC_Os05g02210	turquoise	0.827466	811.84	437.37	374.47	62.9004	0.827466	0.469227	pentatricopeptide, putative, expressed
LOC_Os10g39870	turquoise	0.807898	969.649	376.826	592.823	-215.998	0.807898	0.607092	ATG1, putative, expressed
LOC_Os07g12390	turquoise	0.823916	756.898	404.508	352.39	52.1186	0.823916	0.609214	expressed protein
LOC_Os03g58340	turquoise	0.694475	429.896	178.17	251.726	-73.556	0.694475	0.771417	expressed protein
LOC_Os04g55800	turquoise	0.735399	546.256	273.886	272.37	1.51668	0.735399	0.56055	sulfate transporter, putative, expressed
LOC_Os10g41083	turquoise	0.958205	1688.64	992.341	696.296	296.045	0.958205	0.700408	uncharacterized Cys-rich domain containing protein, putative, expressed
LOC_Os03g58380	turquoise	0.576317	83.6292	48.6018	35.0274	13.5744	0.576317	0.409019	aldehyde oxidase 2, putative, expressed
LOC_Os12g06520	turquoise	0.519821	127.653	47.9353	79.7179	-31.7826	0.519821	0.166602	bZIP transcription factor domain containing protein, expressed
LOC_Os08g10870	turquoise	0.434411	122.459	48.9314	73.5272	-24.5958	0.434411	0.214697	hypothetical protein
LOC_Os09g12270	turquoise	0.309809	146.102	47.5584	98.5437	-50.9853	0.309809	0.220353	peptidyl-prolyl cis-trans isomerase, FKBP-type, putative, expressed
LOC_Os05g39210	turquoise	0.679238	283.879	116.751	167.128	-50.3775	0.679238	0.586248	expressed protein
LOC_Os05g06650	turquoise	0.369952	39.2094	10.19	29.0194	-18.8295	0.369952	0.414669	expressed protein
LOC_Os12g06510	turquoise	0.813733	882.21	407.092	475.118	-68.0263	0.813733	0.422153	calcineurin B, putative, expressed
LOC_Os07g44180	turquoise	0.925236	1422.28	786.759	635.525	151.234	0.925236	0.745841	OsRCI2-10 - Hydrophobic protein LTI6A, expressed
LOC_Os09g12240	turquoise	0.639863	323.739	129.838	193.901	-64.0635	0.639863	0.159393	serine/threonine-protein kinase BRI1-like 1 precursor, putative, expressed
LOC_Os12g06570	turquoise	0.9818	1953.43	1206.28	747.15	459.128	0.9818	0.786427	cyclic nucleotide-gated ion channel, putative, expressed
LOC_Os02g02270	turquoise	0.765694	358	258.519	99.4817	159.037	0.765694	0.545845	expressed protein
LOC_Os08g07600	turquoise	0.969767	1610.03	1107.14	502.89	604.251	0.969767	0.79211	expressed protein
LOC_Os02g02275	turquoise	0.856351	1155.89	543.983	611.907	-67.9245	0.856351	0.441459	expressed protein
LOC_Os01g52910	turquoise	0.566292	162.169	60.5446	101.625	-41.0799	0.566292	0.553751	expressed protein
LOC_Os02g06490	turquoise	0.855512	946.478	534.892	411.586	123.307	0.855512	0.531869	vacuolar protein sorting-associated protein 4, putative, expressed
LOC_Os12g06480	turquoise	0.896851	1200.09	682.878	517.211	165.667	0.896851	0.612188	PHD-finger family protein, expressed
LOC_Os08g07670	turquoise	0.620773	138.227	77.2809	60.946	16.3349	0.620773	0.588422	expressed protein
LOC_Os05g06720	turquoise	0.898016	1705.82	763.006	942.814	-179.808	0.898016	0.88676	GDSL-like lipase/acylhydrolase, putative, expressed
LOC_Os05g06710	turquoise	0.793172	483.188	322.104	161.084	161.02	0.793172	0.365971	GDSL-like lipase/acylhydrolase, putative, expressed
LOC_Os06g24930	turquoise	0.717589	274.094	172.123	101.97	70.1529	0.717589	0.590697	transposon protein, putative, Ac/Ds sub-class, expressed
LOC_Os01g06490	turquoise	0.569532	101.187	54.4368	46.7504	7.68642	0.569532	0.247133	OsSCP1 - Putative Serine Carboxypeptidase homologue, expressed
LOC_Os06g12500	turquoise	0.937658	1245.57	810.82	434.751	376.069	0.937658	0.689281	membrane associated DUF588 domain containing protein, putative, expressed
LOC_Os05g13960	turquoise	0.819402	573.156	363.761	209.395	154.366	0.819402	0.409936	transposon protein, putative, Pong sub-class, expressed
LOC_Os03g21510	turquoise	0.727761	667.253	281.09	386.163	-105.072	0.727761	0.752701	inactive receptor kinase At2g26730 precursor, putative, expressed
LOC_Os11g35430	turquoise	0.424755	264.07	108.244	155.826	-47.582	0.424755	0.044431	csAtPR5, putative, expressed
LOC_Os11g35425	turquoise	0.442221	41.1191	16.7699	24.3493	-7.57936	0.442221	0.316774	expressed protein
LOC_Os02g06400	turquoise	0.697244	435.675	197.049	238.626	-41.5775	0.697244	0.31463	growth regulator related protein, putative, expressed
LOC_Os10g39950	turquoise	0.938616	1250.15	968.138	282.016	686.122	0.938616	0.723545	viral A-type inclusion protein repeat containing protein, expressed
LOC_Os10g41000	turquoise	0.934368	1167.59	816.688	350.903	465.785	0.934368	0.700706	retrotransposon protein, putative, unclassified, expressed
LOC_Os03g58400	turquoise	0.775086	635.365	314.552	320.813	-6.26075	0.775086	0.459182	C-5 cytosine-specific DNA methylase, putative, expressed
LOC_Os10g39760	turquoise	0.895388	1345.33	766.709	578.624	188.086	0.895388	0.846905	WD domain, G-beta repeat domain containing protein, expressed
LOC_Os10g41150	turquoise	0.687012	339.436	175.517	163.919	11.5978	0.687012	0.669037	aminotransferase, classes I and II, domain containing protein, expressed
LOC_Os10g39750	turquoise	0.703122	245.253	131.122	114.131	16.9914	0.703122	0.628809	inducer of CBF expression 2, putative, expressed
LOC_Os10g39744	turquoise	0.249848	13.4873	2.80792	10.6794	-7.87149	0.249848	0.00519606	PE-PGRS family protein, putative, expressed
LOC_Os05g39390	turquoise	0.600469	442.978	192.097	250.88	-58.7829	0.600469	0.220973	outer membrane protein, OMP85 family protein, expressed
LOC_Os08g37320	turquoise	0.86231	940.029	569.218	370.811	198.407	0.86231	0.740183	expressed protein
LOC_Os08g02080	turquoise	0.83705	1026.21	492.368	533.843	-41.4751	0.83705	0.632718	rickettsia 17 kDa surface antigen family protein, expressed
LOC_Os10g39790	turquoise	0.945139	1446.82	893.366	553.457	339.909	0.945139	0.701089	CorA-like magnesium transporter protein, putative, expressed
LOC_Os03g30890	turquoise	0.7545	356.008	262.749	93.2586	169.491	0.7545	0.502992	S-locus-like receptor protein kinase, putative, expressed
LOC_Os08g37345	turquoise	0.487692	60.9848	24.6001	36.3847	-11.7846	0.487692	0.514828	DNA binding protein, putative, expressed
LOC_Os10g41180	turquoise	0.718244	344.651	196.457	148.194	48.2633	0.718244	0.396419	expressed protein
LOC_Os12g06620	turquoise	0.82674	854.121	419.763	434.358	-14.5944	0.82674	0.712083	deoxyhypusine hydroxylase, putative, expressed
LOC_Os05g39374	turquoise	0.954876	1603.67	961.43	642.244	319.186	0.954876	0.779502	expressed protein
LOC_Os01g06600	turquoise	0.694354	522.409	185.523	336.887	-151.364	0.694354	0.582946	glutaryl-CoA dehydrogenase, mitochondrial precursor, putative, expressed
LOC_Os05g02300	turquoise	0.432153	140.233	34.6778	105.555	-70.8777	0.432153	0.369884	Core histone H2A/H2B/H3/H4 domain containing protein, putative, expressed
LOC_Os07g44020	turquoise	0.94578	1690.2	966.56	723.644	242.916	0.94578	0.785171	SNARE associated Golgi protein, putative, expressed
LOC_Os01g06620	turquoise	0.924746	1380.07	1024.12	355.941	668.183	0.924746	0.751244	expressed protein
LOC_Os07g44040	turquoise	0.928671	1531.89	806.088	725.8	80.2886	0.928671	0.703911	ras-related protein, putative, expressed
LOC_Os04g18020	turquoise	0.864699	807.615	574.325	233.29	341.035	0.864699	0.753029	retrotransposon protein, putative, unclassified, expressed
LOC_Os09g24990	turquoise	0.751626	606.886	257.723	349.163	-91.4396	0.751626	0.68896	CAF1 family ribonuclease containing protein, putative, expressed
LOC_Os11g35390	turquoise	0.828648	744.45	406.319	338.13	68.1891	0.828648	0.715282	MYB family transcription factor, putative, expressed
LOC_Os08g26840	turquoise	0.607789	247.467	104.988	142.479	-37.4907	0.607789	0.700456	plant protein of unknown function domain containing protein, expressed
LOC_Os11g35350	turquoise	0.655911	447.235	209.807	237.428	-27.6207	0.655911	0.429188	expressed protein
LOC_Os09g24924	turquoise	0.405825	182.99	49.5914	133.399	-83.8072	0.405825	0.0716887	transporter family protein, putative, expressed
LOC_Os11g35310	turquoise	0.90132	1658.46	698.599	959.863	-261.264	0.90132	0.844847	phytosulfokines precursor, putative, expressed
LOC_Os02g06540	turquoise	0.91075	1184.14	898.666	285.473	613.192	0.91075	0.656475	transporter family protein, putative, expressed
LOC_Os09g24900	turquoise	0.932366	1830.99	895.947	935.04	-39.0935	0.932366	0.867476	methyltransferase, putative, expressed
LOC_Os07g12220	turquoise	0.939962	1332.45	851.207	481.24	369.968	0.939962	0.678749	expressed protein
LOC_Os03g30810	turquoise	0.883745	1149.93	612.416	537.519	74.8966	0.883745	0.640727	retrotransposon protein, putative, unclassified, expressed
LOC_Os02g06520	turquoise	0.851018	1181.53	530.023	651.502	-121.479	0.851018	0.759744	OsFBLD1 - F-box, LRR and FBD domain containing protein, expressed
LOC_Os02g06510	turquoise	0.958628	1473.43	1117.04	356.392	760.647	0.958628	0.739021	myosin heavy chain, putative, expressed
LOC_Os03g58520	turquoise	0.590418	137.522	68.6069	68.9147	-0.307844	0.590418	0.643491	green ripe-like, putative, expressed
LOC_Os07g12250	turquoise	0.517615	398.071	170.353	227.717	-57.3642	0.517615	0.151145	ribosomal protein L24, putative, expressed
LOC_Os03g58100	turquoise	0.605965	123.378	58.5738	64.8043	-6.23055	0.605965	0.33756	pentatricopeptide, putative, expressed
LOC_Os01g06340	turquoise	0.483439	72.8162	31.1841	41.6321	-10.448	0.483439	0.216573	expressed protein
LOC_Os08g37010	turquoise	0.40867	79.3035	23.7026	55.601	-31.8984	0.40867	0.0788316	gibberellin receptor GID1L2, putative, expressed
LOC_Os03g30780	turquoise	0.408271	90.799	29.9534	60.8457	-30.8923	0.408271	0.0502373	expressed protein
LOC_Os08g02190	turquoise	0.886877	988.625	597.886	390.739	207.147	0.886877	0.630026	expressed protein
LOC_Os05g02010	turquoise	0.357411	144.231	43.6873	100.544	-56.8568	0.357411	0.105337	expressed protein
LOC_Os02g33470	turquoise	0.405849	30.9517	14.269	16.6826	-2.41359	0.405849	0.306331	transposon protein, putative, Pong sub-class, expressed
LOC_Os05g02020	turquoise	0.831478	804.396	452.93	351.466	101.465	0.831478	0.521125	protein kinase APK1A, chloroplast precursor, putative, expressed
LOC_Os06g12350	turquoise	0.42502	79.2128	31.0843	48.1285	-17.0442	0.42502	0.3604	amino acid transporter, putative, expressed
LOC_Os01g45350	turquoise	0.949952	1546.02	1113.25	432.779	680.466	0.949952	0.737577	exostosin family protein, putative, expressed
LOC_Os10g39610	turquoise	0.703101	536.676	216.297	320.378	-104.081	0.703101	0.538286	expressed protein
LOC_Os10g41260	turquoise	0.631758	465.533	154.461	311.071	-156.61	0.631758	0.32937	MYB family transcription factor, putative, expressed
LOC_Os11g35620	turquoise	0.885424	1045.54	616.54	429.001	187.539	0.885424	0.545271	expressed protein
LOC_Os06g12360	turquoise	0.389268	79.2711	26.8167	52.4543	-25.6376	0.389268	0.330526	pentatricopeptide, putative, expressed
LOC_Os05g06480	turquoise	0.627049	237.835	113.484	124.35	-10.866	0.627049	0.682076	inorganic H+ pyrophosphatase, putative, expressed
LOC_Os01g45370	turquoise	0.812777	581.534	349.84	231.694	118.146	0.812777	0.447515	radical SAM enzyme, putative, expressed
LOC_Os07g12150	turquoise	0.866581	1122.89	560.841	562.052	-1.21104	0.866581	0.666715	acyl carrier protein, putative, expressed
LOC_Os07g16970	turquoise	0.881977	1243.77	637.274	606.494	30.7807	0.881977	0.544748	rab GDP dissociation inhibitor alpha, putative, expressed
LOC_Os09g12480	turquoise	0.739051	341.457	239.617	101.841	137.776	0.739051	0.676157	ulp1 protease family, C-terminal catalytic domain containing protein, expressed
LOC_Os03g58170	turquoise	0.941895	1445.09	900.139	544.947	355.193	0.941895	0.716226	stem-specific protein TSJT1, putative, expressed
LOC_Os07g16980	turquoise	0.867016	1076.26	543.636	532.626	11.0101	0.867016	0.759078	expressed protein
LOC_Os12g06780	turquoise	0.941838	1486.99	902.499	584.489	318.01	0.941838	0.738836	expressed protein
LOC_Os05g06450	turquoise	0.775914	580.589	290.64	289.949	0.690247	0.775914	0.504512	tubulin/FtsZ domain containing protein, putative, expressed
LOC_Os03g58190	turquoise	0.953769	1572.03	1104.44	467.596	636.841	0.953769	0.755984	expressed protein
LOC_Os02g02070	turquoise	0.718837	296.768	159.21	137.558	21.6518	0.718837	0.374782	hypothetical protein
LOC_Os01g38580	turquoise	0.39332	68.4032	15.3711	53.0321	-37.661	0.39332	0.679845	beta,beta-carotene 9,10-dioxygenase, putative, expressed
LOC_Os09g12550	turquoise	0.839823	747.018	562.854	184.163	378.691	0.839823	0.751697	WD domain, G-beta repeat domain containing protein, expressed
LOC_Os09g24860	turquoise	0.231819	28.3441	6.46369	21.8804	-15.4167	0.231819	0.0827604	expressed protein
LOC_Os10g41220	turquoise	0.91575	984.399	771.145	213.254	557.892	0.91575	0.708481	protein kinase family protein, putative, expressed
LOC_Os01g45380	turquoise	0.682696	272.914	154.425	118.489	35.9361	0.682696	0.63392	protein kinase domain containing protein, expressed
LOC_Os01g38500	turquoise	0.923044	1541.14	874.303	666.835	207.468	0.923044	0.699874	DUF538 domain containing protein, putative, expressed
LOC_Os06g12320	turquoise	0.809238	1005.61	406.646	598.967	-192.321	0.809238	0.896606	transmembrane amino acid transporter protein, putative, expressed
LOC_Os01g45390	turquoise	0.89923	1157.56	704.264	453.3	250.964	0.89923	0.605207	HD domain containing protein 2, putative, expressed
LOC_Os09g31470	turquoise	0.538261	216.976	68.4762	148.5	-80.0239	0.538261	0.163239	AT hook motif domain containing protein, expressed
LOC_Os09g24810	turquoise	0.607715	142.31	75.461	66.849	8.61202	0.607715	0.586296	ZF-HD protein dimerisation region containing protein, expressed
LOC_Os11g43600	turquoise	0.84444	1044.33	464.136	580.195	-116.059	0.84444	0.623605	peptide chain release factor protein, putative, expressed
LOC_Os01g38520	turquoise	0.492049	317.091	115.392	201.7	-86.3081	0.492049	0.0604798	expressed protein
LOC_Os08g37060	turquoise	0.7156	556.703	246.432	310.271	-63.8386	0.7156	0.622155	gibberellin receptor GID1L2, putative, expressed
LOC_Os04g55650	turquoise	0.747707	511.201	254.127	257.074	-2.94702	0.747707	0.319026	oryzain alpha chain precursor, putative, expressed
LOC_Os01g38510	turquoise	0.710138	623.927	250.677	373.25	-122.573	0.710138	0.478742	protein transport protein Sec61 subunit beta, putative, expressed
LOC_Os02g06650	turquoise	0.916228	1359.68	842.962	516.714	326.248	0.916228	0.649348	COX VIIa, putative, expressed
LOC_Os01g38530	turquoise	0.518957	128.63	63.4897	65.1399	-1.65018	0.518957	0.480225	ELF3 protein, putative, expressed
LOC_Os11g43640	turquoise	0.869526	1065.18	586.392	478.792	107.601	0.869526	0.66731	retrotransposon protein, putative, unclassified, expressed
LOC_Os09g24800	turquoise	0.873868	894.777	530.195	364.582	165.612	0.873868	0.581064	MYB family transcription factor, putative, expressed
LOC_Os09g31458	turquoise	0.936979	1517.95	837.504	680.451	157.053	0.936979	0.610907	expressed protein
LOC_Os03g30680	turquoise	0.534956	74.8625	34.8481	40.0144	-5.16623	0.534956	0.251946	expressed protein
LOC_Os12g06840	turquoise	0.962242	1698.19	1102.45	595.74	506.707	0.962242	0.780956	ATEXO70C2, putative, expressed
LOC_Os09g31514	turquoise	0.200128	96.183	16.83	79.353	-62.523	0.200128	0.107863	dihydroflavonol-4-reductase, putative, expressed
LOC_Os01g52660	turquoise	0.876818	1412.27	657.034	755.241	-98.207	0.876818	0.747384	POEI51 - Pollen Ole e I allergen and extensin family protein precursor, expressed
LOC_Os12g06850	turquoise	0.624273	307.361	125.89	181.471	-55.5809	0.624273	0.369188	transcription elongation factor protein, putative, expressed
LOC_Os05g02120	turquoise	0.650432	309.937	121.716	188.221	-66.505	0.650432	0.553151	pectinacetylesterase domain containing protein, expressed
LOC_Os10g39520	turquoise	0.857998	1343.36	526.794	816.568	-289.774	0.857998	0.775661	MLO domain containing protein, putative, expressed
LOC_Os01g69980	turquoise	0.731563	420.235	194.47	225.766	-31.2962	0.731563	0.441494	TCP family transcription factor, putative, expressed
LOC_Os02g33310	turquoise	0.60266	183.05	78.5592	104.491	-25.9314	0.60266	0.467793	OsFBD7 - F-box and FBD domain containing protein, expressed
LOC_Os07g44230	turquoise	0.624595	286.273	144.293	141.98	2.31261	0.624595	0.19664	ribosomal protein L7Ae/L30e/S12e/Gadd45 family protein, putative, expressed
LOC_Os05g06350	turquoise	0.851554	821.095	475.756	345.339	130.417	0.851554	0.590215	importin subunit alpha, putative, expressed
LOC_Os10g41380	turquoise	0.441396	338.414	112.903	225.511	-112.608	0.441396	0.0632844	expressed protein
LOC_Os05g06330	turquoise	0.882951	1235.18	660.272	574.909	85.3624	0.882951	0.581643	nifU, putative, expressed
LOC_Os02g02150	turquoise	0.78042	848.274	391.82	456.454	-64.6345	0.78042	0.397095	ATP-dependent helicase HRQ1, putative, expressed
LOC_Os01g69950	turquoise	0.667929	357.699	133.632	224.067	-90.4354	0.667929	0.75976	ribosomal protein L27, putative, expressed
LOC_Os09g20480	turquoise	0.94633	1655.46	958.865	696.592	262.273	0.94633	0.715262	transporter, putative, expressed
LOC_Os05g06340	turquoise	0.715901	484.358	187.518	296.84	-109.323	0.715901	0.446354	GATA zinc finger domain containing protein, expressed
LOC_Os02g02140	turquoise	0.782136	684.11	331.64	352.471	-20.8308	0.782136	0.784434	receptor protein kinase CLAVATA1 precursor, putative, expressed
LOC_Os05g39580	turquoise	0.718233	346.696	202.335	144.362	57.973	0.718233	0.504882	bet v I allergen family protein, putative, expressed
LOC_Os09g12590	turquoise	0.693613	335.05	154.42	180.63	-26.2107	0.693613	0.752129	transporter family protein, putative, expressed
LOC_Os07g44299	turquoise	0.280654	82.9928	25.6442	57.3486	-31.7043	0.280654	0.144436	pentatricopeptide, putative, expressed
LOC_Os05g06300	turquoise	0.886612	1016.33	627.759	388.571	239.188	0.886612	0.679812	3-hydroxyacyl-CoA dehydrogenase, putative, expressed
LOC_Os03g58270	turquoise	0.68022	177.565	110.903	66.6618	44.2416	0.68022	0.587427	retrotransposon protein, putative, unclassified, expressed
LOC_Os03g58260	turquoise	0.902099	1285	731.348	553.649	177.699	0.902099	0.575654	indole-3-glycerol phosphate lyase, chloroplast precursor, putative, expressed
LOC_Os01g69930	turquoise	0.807836	752.48	405.699	346.781	58.9176	0.807836	0.621321	dnaJ domain containing protein, expressed
LOC_Os11g27470	turquoise	0.648026	147.828	106.596	41.2324	65.3635	0.648026	0.531381	expressed protein
LOC_Os05g50960	turquoise	0.878621	1462.74	607.891	854.848	-246.958	0.878621	0.753879	polygalacturonase, putative, expressed
LOC_Os09g12630	turquoise	0.876306	1083.68	777.437	306.242	471.195	0.876306	0.778504	expressed protein
LOC_Os11g43560	turquoise	0.934679	1250.66	846.191	404.467	441.723	0.934679	0.716314	retrotransposon protein, putative, unclassified, expressed
LOC_Os05g39600	turquoise	0.93753	1378.87	1014.84	364.024	650.82	0.93753	0.742288	ATCHX15, putative, expressed
LOC_Os02g33410	turquoise	0.37878	65.6374	28.0622	37.5752	-9.51303	0.37878	0.102747	expressed protein
LOC_Os04g55780	turquoise	0.796676	665.39	422.233	243.157	179.077	0.796676	0.71257	expressed protein
LOC_Os01g45274	turquoise	0.921911	1392.1	972.535	419.564	552.971	0.921911	0.685555	carbonic anhydrase, chloroplast precursor, putative, expressed
LOC_Os05g02060	turquoise	0.951345	1620.55	937.359	683.189	254.171	0.951345	0.738682	mitochondrial import inner membrane translocase subunit Tim17, putative, expressed
LOC_Os03g30610	turquoise	0.475041	68.2738	29.3482	38.9256	-9.5774	0.475041	0.0903881	ubiquinone oxidoreductase, putative, expressed
LOC_Os02g06790	turquoise	0.843235	1231.61	554.547	677.062	-122.515	0.843235	0.757051	expressed protein
LOC_Os05g02050	turquoise	0.672791	317.498	169.827	147.67	22.157	0.672791	0.854876	mitochondrial import inner membrane translocase subunit Tim, putative, expressed
LOC_Os10g41310	turquoise	0.462939	107.761	31.9642	75.7967	-43.8325	0.462939	0.0701293	DUF630/DUF632 domains containing protein, putative, expressed
LOC_Os09g12620	turquoise	0.971646	1631.75	1139.72	492.027	647.695	0.971646	0.786729	GPI-anchored protein, putative, expressed
LOC_Os08g03440	turquoise	0.797911	1104.87	386.852	718.016	-331.164	0.797911	0.494209	actin, putative, expressed
LOC_Os01g38660	turquoise	0.244216	64.8197	14.0275	50.7922	-36.7647	0.244216	0.0012006	expressed protein
LOC_Os10g41300	turquoise	0.404336	118.582	26.2294	92.3526	-66.1232	0.404336	0.055616	expressed protein
LOC_Os05g02030	turquoise	0.480019	320.031	105.933	214.098	-108.165	0.480019	0.0671757	OB-fold nucleic acid binding domain containing protein, putative, expressed
LOC_Os01g38650	turquoise	0.956311	1626.96	1122.15	504.81	617.341	0.956311	0.779145	expressed protein
LOC_Os04g18520	turquoise	0.7467	383.789	217.342	166.447	50.8953	0.7467	0.520522	retrotransposon protein, putative, Ty3-gypsy subclass, expressed
LOC_Os11g43070	turquoise	0.601449	122.153	63.0481	59.1047	3.94337	0.601449	0.403672	expressed protein
LOC_Os09g24580	turquoise	0.95478	1516.2	1078.06	438.147	639.91	0.95478	0.801848	EF hand family protein, putative, expressed
LOC_Os08g41650	turquoise	0.950218	1456.52	1076.89	379.633	697.254	0.950218	0.760486	expressed protein
LOC_Os08g10410	turquoise	0.436369	72.8971	21.8357	51.0614	-29.2258	0.436369	0.390895	expressed protein
LOC_Os03g26080	turquoise	0.768933	518.603	297.904	220.699	77.2052	0.768933	0.423646	nucleoside-triphosphatase, putative, expressed
LOC_Os08g41680	turquoise	0.61821	423.502	135.145	288.357	-153.212	0.61821	0.662696	expressed protein
LOC_Os06g48960	turquoise	0.755176	797.274	372.4	424.874	-52.4744	0.755176	0.458772	AIG2-like family domain containing protein, expressed
LOC_Os08g10440	turquoise	0.797681	744.113	326.925	417.188	-90.2634	0.797681	0.783842	NBS-LRR disease resistance protein, putative, expressed
LOC_Os01g57940	turquoise	0.931157	1348.9	1026.25	322.646	703.607	0.931157	0.751531	tyrosine protein kinase domain containing protein, putative, expressed
LOC_Os06g51100	turquoise	0.947367	1404.96	910.489	494.473	416.016	0.947367	0.695758	transmembrane protein, putative, expressed
LOC_Os08g10450	turquoise	0.876044	1062.89	562.879	500.013	62.8667	0.876044	0.709046	nucleoside transporter, putative, expressed
LOC_Os02g27030	turquoise	0.621391	307.197	109.381	197.815	-88.4337	0.621391	0.277177	cysteine proteinase 1 precursor, putative, expressed
LOC_Os06g48980	turquoise	0.941596	1524.4	1086.7	437.696	649.004	0.941596	0.799491	protein kinase APK1B, chloroplast precursor, putative, expressed
LOC_Os02g41961	turquoise	0.848857	1094.81	619.217	475.594	143.623	0.848857	0.80163	expressed protein
LOC_Os06g12129	turquoise	0.46768	61.8648	18.8126	43.0522	-24.2396	0.46768	0.303698	expressed protein
LOC_Os03g21914	turquoise	0.539634	174.073	65.2794	108.794	-43.5142	0.539634	0.440984	ATP binding protein, putative, expressed
LOC_Os03g42100	turquoise	0.396578	54.6184	10.3463	44.2722	-33.9259	0.396578	0.562043	helix-loop-helix DNA-binding domain containing protein, expressed
LOC_Os02g33670	turquoise	0.526288	159.819	47.1534	112.665	-65.5121	0.526288	0.241689	expressed protein
LOC_Os02g10140	turquoise	0.613832	321.921	103.525	218.396	-114.871	0.613832	0.343831	bZIP transcription factor domain containing protein, expressed
LOC_Os03g30580	turquoise	0.191502	46.6152	5.99815	40.6171	-34.6189	0.191502	0.13936	expressed protein
LOC_Os02g10130	turquoise	0.78664	601.75	320.227	281.523	38.7038	0.78664	0.495673	tubulin binding cofactor C, putative, expressed
LOC_Os08g19780	turquoise	0.961891	1635.24	1134.67	500.572	634.095	0.961891	0.779703	expressed protein
LOC_Os05g43880	turquoise	0.918913	1469.11	836.844	632.27	204.574	0.918913	0.86137	gibberellin 2-beta-dioxygenase, putative, expressed
LOC_Os05g43895	turquoise	0.544736	77.7829	48.2308	29.5521	18.6788	0.544736	0.408872	expressed protein
LOC_Os08g19790	turquoise	0.732521	468.815	306.475	162.34	144.134	0.732521	0.509736	retrotransposon protein, putative, Ty3-gypsy subclass, expressed
LOC_Os01g52530	turquoise	0.736227	713.324	317.986	395.338	-77.3511	0.736227	0.323751	phosphoribosyl transferase, putative, expressed
LOC_Os05g18604	turquoise	0.863941	861.932	494.608	367.324	127.284	0.863941	0.632942	OsSCP28 - Putative Serine Carboxypeptidase homologue, expressed
LOC_Os07g37220	turquoise	0.864452	849.844	604.087	245.757	358.331	0.864452	0.670456	inositol-1-monophosphatase, putative, expressed
LOC_Os03g30530	turquoise	0.673427	548.072	182.184	365.888	-183.704	0.673427	0.283896	expressed protein
LOC_Os08g19770	turquoise	0.583804	219.711	81.1636	138.547	-57.3836	0.583804	0.444646	expressed protein
LOC_Os08g03780	turquoise	0.812962	822.218	415.929	406.289	9.64043	0.812962	0.565346	retrotransposon protein, putative, Ty3-gypsy subclass, expressed
LOC_Os03g30519	turquoise	0.354328	22.3044	7.22177	15.0826	-7.86084	0.354328	0.314608	expressed protein
LOC_Os10g41420	turquoise	0.837677	1048.52	475.629	572.895	-97.2667	0.837677	0.697161	expressed protein
LOC_Os08g03790	turquoise	0.602669	260.129	115.551	144.578	-29.0272	0.602669	0.383384	expressed protein
LOC_Os06g51084	turquoise	0.796662	569.622	434.431	135.191	299.24	0.796662	0.772373	1,4-alpha-glucan-branching enzyme, chloroplast precursor, putative, expressed
LOC_Os02g33700	turquoise	0.747674	592.709	446.612	146.097	300.515	0.747674	0.625636	expressed protein
LOC_Os02g41900	turquoise	0.530095	94.9244	41.8047	53.1197	-11.315	0.530095	0.56623	expressed protein
LOC_Os08g02330	turquoise	0.746788	593.05	297.324	295.726	1.59868	0.746788	0.723172	RNA recognition motif containing protein, putative, expressed
LOC_Os10g09160	turquoise	0.698905	321.609	168.043	153.566	14.4778	0.698905	0.457748	cytochrome P450, putative, expressed
LOC_Os03g21964	turquoise	0.756964	384.342	251.86	132.483	119.377	0.756964	0.689938	expressed protein
LOC_Os05g34920	turquoise	0.433405	65.6882	16.0531	49.6352	-33.5821	0.433405	0.204453	expressed protein
LOC_Os03g21950	turquoise	0.876679	1196.1	624.969	571.131	53.8376	0.876679	0.581521	fumarate hydratase, mitochondrial precursor, putative, expressed
LOC_Os10g41480	turquoise	0.953468	1838	970.352	867.645	102.707	0.953468	0.684354	phospho-2-dehydro-3-deoxyheptonate aldolase, chloroplast precursor, putative, expressed
LOC_Os05g34940	turquoise	0.58049	260.968	98.8143	162.153	-63.3391	0.58049	0.206226	OsMADS4 - MADS-box family gene with MIKCc type-box, expressed
LOC_Os07g12730	turquoise	0.420029	45.3145	20.2411	25.0734	-4.83229	0.420029	0.253646	DUF567 domain containing protein, putative, expressed
LOC_Os06g51000	turquoise	0.82075	721.594	367.888	353.705	14.1827	0.82075	0.645554	carrier, putative, expressed
LOC_Os11g06790	turquoise	0.829571	847.419	655.69	191.729	463.961	0.829571	0.688307	retrotransposon protein, putative, unclassified, expressed
LOC_Os09g24640	turquoise	0.80809	649.194	338.518	310.676	27.8425	0.80809	0.514412	pentatricopeptide, putative, expressed
LOC_Os07g28300	turquoise	0.452094	29.7901	14.1132	15.6768	-1.56361	0.452094	0.284967	leucine rich repeat protein, putative, expressed
LOC_Os09g24660	turquoise	0.78601	648.554	352.97	295.585	57.3847	0.78601	0.826823	AGAP000554-PA, putative, expressed
LOC_Os09g24680	turquoise	0.611394	139.703	80.0837	59.6194	20.4643	0.611394	0.492082	pentatricopeptide, putative, expressed
LOC_Os03g38930	turquoise	0.76985	592.146	307.987	284.158	23.8292	0.76985	0.529534	expressed protein
LOC_Os09g12770	turquoise	0.523787	185.521	76.4008	109.121	-32.7198	0.523787	0.145925	Myb-like DNA-binding domain containing protein, putative, expressed
LOC_Os08g03770	turquoise	0.392747	75.2576	33.3165	41.9412	-8.62472	0.392747	0.147991	expressed protein
LOC_Os12g22920	turquoise	0.885679	1097.72	636.886	460.838	176.048	0.885679	0.543783	expressed protein
LOC_Os04g18400	turquoise	0.772032	611.217	364.708	246.51	118.198	0.772032	0.792863	retrotransposon protein, putative, unclassified, expressed
LOC_Os02g10080	turquoise	0.567719	183.811	89.1282	94.683	-5.55482	0.567719	0.583445	zinc finger C-x8-C-x5-C-x3-H type family protein, expressed
LOC_Os02g10070	turquoise	0.991707	1899.02	1229.88	669.141	560.736	0.991707	0.762676	citrate synthase, putative, expressed
LOC_Os02g10060	turquoise	0.699616	357.299	155.316	201.983	-46.6665	0.699616	0.780646	SWIRM domain containing protein, expressed
LOC_Os03g16910	turquoise	0.585628	133.116	87.8936	45.2221	42.6716	0.585628	0.498869	SLT1 protein, putative, expressed
LOC_Os03g58070	turquoise	0.884295	970.945	570.848	400.097	170.752	0.884295	0.714879	frigida, putative, expressed
LOC_Os03g58080	turquoise	0.310323	50.446	12.2012	38.2448	-26.0437	0.310323	0.377977	BT1 family protein, putative, expressed
LOC_Os02g10040	turquoise	0.822263	546.412	389.135	157.276	231.859	0.822263	0.558394	guanine nucleotide-exchange protein like, putative, expressed
LOC_Os11g06960	turquoise	0.906544	1053.68	758.602	295.075	463.527	0.906544	0.743821	retrotransposon protein, putative, unclassified, expressed
LOC_Os09g20220	turquoise	0.502632	73.649	37.1535	36.4955	0.658033	0.502632	0.198609	glutathione S-transferase, putative, expressed
LOC_Os06g51220	turquoise	0.645377	256.09	112.258	143.832	-31.574	0.645377	0.603664	HMG1/2, putative, expressed
LOC_Os02g10010	turquoise	0.566635	146.229	57.6605	88.569	-30.9085	0.566635	0.7174	expressed protein
LOC_Os01g52460	turquoise	0.771692	387.528	250.84	136.688	114.152	0.771692	0.565129	regulator of ribonuclease, putative, expressed
LOC_Os09g20250	turquoise	0.699615	534.241	236.982	297.259	-60.2765	0.699615	0.594641	retrotransposon protein, putative, Ty1-copia subclass, expressed
LOC_Os02g41880	turquoise	0.540246	155.953	62.8083	93.1444	-30.3361	0.540246	0.537856	expressed protein
LOC_Os05g43770	turquoise	0.521774	346.508	162.766	183.742	-20.976	0.521774	0.0783702	NLI interacting factor-like phosphatase, putative, expressed
LOC_Os08g14760	turquoise	0.81346	700.734	358.2	342.534	15.666	0.81346	0.462792	AMP-binding domain containing protein, expressed
LOC_Os01g01115	turquoise	0.511587	178.192	52.6956	125.497	-72.8011	0.511587	0.470118	pentatricopeptide, putative, expressed
LOC_Os10g41534	turquoise	0.663175	548.03	230.023	318.007	-87.9842	0.663175	0.664909	ICE-like protease p20 domain containing protein, expressed
LOC_Os08g03670	turquoise	0.972731	1659.03	1159.71	499.318	660.395	0.972731	0.754999	galactosyltransferase family protein, putative, expressed
LOC_Os10g16720	turquoise	0.561785	105.88	43.5504	62.3296	-18.7792	0.561785	0.401685	retrotransposon protein, putative, Ty3-gypsy subclass, expressed
LOC_Os08g14810	turquoise	0.456	166.344	47.9803	118.364	-70.3836	0.456	0.0941353	NB-ARC domain containing protein, expressed
LOC_Os09g29970	turquoise	0.696878	273.398	145.367	128.032	17.3348	0.696878	0.377522	TMV-MP30 binding protein 2C, putative, expressed
LOC_Os08g02450	turquoise	0.981879	1902.04	1177.33	724.71	452.624	0.981879	0.788633	ATCHX, putative, expressed
LOC_Os04g14190	turquoise	0.945443	1373.5	901.626	471.877	429.749	0.945443	0.721121	TRAF-type zinc finger family protein, expressed
LOC_Os02g06970	turquoise	0.890665	974.687	651.143	323.544	327.599	0.890665	0.680433	expressed protein
LOC_Os02g33640	turquoise	0.552502	68.1649	33.953	34.2119	-0.258885	0.552502	0.416267	expressed protein
LOC_Os08g03600	turquoise	0.627558	160.337	91.9708	68.3665	23.6043	0.627558	0.115944	expressed protein
LOC_Os06g51130	turquoise	0.914807	1238.43	901.467	336.962	564.505	0.914807	0.703133	spotted leaf 11, putative, expressed
LOC_Os08g02440	turquoise	0.725352	424.056	234.462	189.594	44.8681	0.725352	0.700439	expressed protein
LOC_Os07g12610	turquoise	0.641668	149.864	77.1327	72.7308	4.4019	0.641668	0.36879	OsFBX227 - F-box domain containing protein, expressed
LOC_Os03g58090	turquoise	0.85219	970.097	512.931	457.166	55.7651	0.85219	0.6166	expressed protein
LOC_Os09g29990	turquoise	0.90555	1212.61	917.181	295.43	621.751	0.90555	0.689686	skin secretory protein xP2 precursor, putative, expressed
LOC_Os01g57910	turquoise	0.11991	47.7696	11.0867	36.683	-25.5963	0.11991	0.0346948	KH domain containing protein, putative, expressed
LOC_Os07g12630	turquoise	0.913518	1328	759.427	568.572	190.854	0.913518	0.552682	transcription elongation factor protein, putative, expressed
LOC_Os08g03620	turquoise	0.377257	47.3349	16.4131	30.9219	-14.5088	0.377257	0.376354	tetratricopeptide repeat domain containing protein, expressed
LOC_Os05g34854	turquoise	0.595	203.145	74.0408	129.104	-55.0634	0.595	0.720135	gibberellin 20 oxidase 2, putative, expressed
LOC_Os04g26380	turquoise	0.812198	661.2	463.197	198.003	265.193	0.812198	0.752605	aspartic proteinase-like protein 2 precursor, putative, expressed
LOC_Os02g02490	turquoise	0.549243	258.202	68.8331	189.369	-120.536	0.549243	0.226932	phytosulfokine receptor precursor, putative, expressed
LOC_Os11g27130	turquoise	0.714261	401.177	189.232	211.945	-22.7135	0.714261	0.721942	HAT dimerisation protein, putative, expressed
LOC_Os05g39000	turquoise	0.906118	1202.4	931.005	271.397	659.608	0.906118	0.703921	KIP1, putative, expressed
LOC_Os01g45720	turquoise	0.456771	27.4946	12.6864	14.8082	-2.12184	0.456771	0.397983	expressed protein
LOC_Os12g06300	turquoise	0.87875	967.323	609.1	358.223	250.877	0.87875	0.75831	expressed protein
LOC_Os06g51310	turquoise	0.934317	1961.4	893.16	1068.24	-175.075	0.934317	0.829432	PAZ domain containing protein, putative, expressed
LOC_Os08g10630	turquoise	0.586248	201.762	81.5229	120.239	-38.7163	0.586248	0.381409	metal cation transporter, putative, expressed
LOC_Os06g30710	turquoise	0.772674	377.902	262.863	115.039	147.824	0.772674	0.487293	DGCR14, putative, expressed
LOC_Os08g10649	turquoise	0.212126	48.9391	8.9132	40.0259	-31.1127	0.212126	0.0703915	GTPase of unknown function domain containing protein, putative, expressed
LOC_Os01g45770	turquoise	0.615019	172.546	68.787	103.759	-34.9716	0.615019	0.511803	expressed protein
LOC_Os03g16840	turquoise	0.826176	766.149	594.634	171.515	423.118	0.826176	0.687108	expressed protein
LOC_Os06g34950	turquoise	0.909876	1237.64	686.332	551.305	135.027	0.909876	0.565263	expressed protein
LOC_Os08g10608	turquoise	0.454736	214.923	68.4178	146.505	-78.0873	0.454736	0.0833096	ribosomal protein S17, putative, expressed
LOC_Os05g06050	turquoise	0.967393	1690.41	1071.49	618.915	452.579	0.967393	0.750576	N-acetylglucosaminyltransferase, putative, expressed
LOC_Os05g06000	turquoise	0.89302	1275.44	673.029	602.41	70.6192	0.89302	0.601963	expressed protein
LOC_Os02g10380	turquoise	0.735795	607.207	246.79	360.417	-113.627	0.735795	0.601241	Regulator of chromosome condensation domain containing protein, expressed
LOC_Os11g27170	turquoise	0.704777	351.176	132.806	218.37	-85.5634	0.704777	0.602387	OsSCP58 - Putative Serine Carboxypeptidase homologue, expressed
LOC_Os09g12900	turquoise	0.756638	412.068	248.791	163.277	85.5144	0.756638	0.622028	expressed protein
LOC_Os05g39050	turquoise	0.446725	152.186	42.8055	109.38	-66.5749	0.446725	0.499034	Core histone H2A/H2B/H3/H4 domain containing protein, putative, expressed
LOC_Os10g16550	turquoise	0.620258	161.646	77.6214	84.0251	-6.40376	0.620258	0.227069	retrotransposon protein, putative, Ty3-gypsy subclass, expressed
LOC_Os07g12590	turquoise	0.605858	172.911	75.4564	97.4543	-21.9979	0.605858	0.579047	OsFBX225 - F-box domain containing protein, expressed
LOC_Os10g41660	turquoise	0.477252	131.005	44.8547	86.1503	-41.2957	0.477252	0.120645	zinc finger, C3HC4 type domain containing protein, expressed
LOC_Os11g32030	turquoise	0.711556	292.638	151.532	141.106	10.4263	0.711556	0.601305	sex determination protein tasselseed-2, putative, expressed
LOC_Os02g33944	turquoise	0.810648	837.998	371.452	466.546	-95.0944	0.810648	0.660279	transposon protein, putative, CACTA, En/Spm sub-class, expressed
LOC_Os01g52270	turquoise	0.675165	192.849	134.527	58.3219	76.2048	0.675165	0.562793	NB-ARC domain containing protein, expressed
LOC_Os09g12980	turquoise	0.909277	1293.62	725.755	567.867	157.888	0.909277	0.656116	retrotransposon protein, putative, LINE subclass
LOC_Os09g12970	turquoise	0.780357	583.77	326.547	257.223	69.3244	0.780357	0.605476	plant protein of unknown function domain containing protein, expressed
LOC_Os04g49954	turquoise	0.473913	123.717	46.9347	76.7819	-29.8471	0.473913	0.438953	expressed protein
LOC_Os08g41850	turquoise	0.718789	599.735	219.283	380.452	-161.17	0.718789	0.473397	expressed protein
LOC_Os07g24980	turquoise	0.377444	98.0129	30.7325	67.2804	-36.548	0.377444	0.0422708	retrotransposon protein, putative, Ty3-gypsy subclass, expressed
LOC_Os10g41640	turquoise	0.383043	63.6282	14.5499	49.0783	-34.5283	0.383043	0.176194	transcription factor HBP-1b, putative, expressed
LOC_Os02g33910	turquoise	0.544638	148.099	42.2131	105.886	-63.6727	0.544638	0.590421	retrotransposon protein, putative, Ty3-gypsy subclass, expressed
LOC_Os12g06270	turquoise	0.946776	1543.19	920.724	622.469	298.255	0.946776	0.719196	retrotransposon protein, putative, unclassified, expressed
LOC_Os02g02450	turquoise	0.889431	1155.56	896.306	259.251	637.055	0.889431	0.704621	transposon protein, putative, unclassified, expressed
LOC_Os03g16900	turquoise	0.98737	1791.9	1203.48	588.412	615.071	0.98737	0.762895	rab GDP dissociation inhibitor alpha, putative, expressed
LOC_Os04g49990	turquoise	0.658742	341.312	142.915	198.398	-55.4831	0.658742	0.511727	AT hook motif domain containing protein, expressed
LOC_Os08g02540	turquoise	0.848636	869.064	514.53	354.535	159.995	0.848636	0.625284	adenylate kinase, putative, expressed
LOC_Os02g02460	turquoise	0.940034	1425.94	1013.73	412.219	601.507	0.940034	0.724968	transposon protein, putative, unclassified, expressed
LOC_Os08g10590	turquoise	0.363503	116.909	41.5047	75.4038	-33.8991	0.363503	0.0678798	expressed protein
LOC_Os01g38140	turquoise	0.737498	333.318	202.517	130.801	71.7159	0.737498	0.423889	retrotransposon protein, putative, unclassified, expressed
LOC_Os02g19990	turquoise	0.649748	369.335	118.669	250.665	-131.996	0.649748	0.682983	reticulon domain containing protein, putative, expressed
LOC_Os09g24408	turquoise	0.687792	219.711	147.3	72.4108	74.8894	0.687792	0.387715	conserved hypothetical protein
LOC_Os06g48770	turquoise	0.574975	181.086	67.6877	113.398	-45.7104	0.574975	0.136939	OsSBeL1 - Putative Serine Beta-Lactamase homologue, expressed
LOC_Os09g20000	turquoise	0.810764	658.728	435.185	223.542	211.643	0.810764	0.510123	heavy metal-associated domain containing protein, expressed
LOC_Os05g43940	turquoise	0.435138	28.77	12.7885	15.9815	-3.19295	0.435138	0.291258	O-methyltransferase, putative, expressed
LOC_Os11g27020	turquoise	0.695025	695.197	292.908	402.29	-109.382	0.695025	0.308474	expressed protein
LOC_Os05g39130	turquoise	0.359206	17.2179	4.07825	13.1397	-9.06143	0.359206	0.241009	retrotransposon protein, putative, unclassified, expressed
LOC_Os05g43920	turquoise	0.849203	744.315	481.936	262.379	219.557	0.849203	0.472425	auxin response factor 14, putative, expressed
LOC_Os01g38180	turquoise	0.854874	798.176	507.46	290.716	216.743	0.854874	0.694544	peptidyl-prolyl isomerase, putative, expressed
LOC_Os06g51470	turquoise	0.752731	349.179	208.662	140.517	68.1446	0.752731	0.452193	expressed protein
LOC_Os12g33956	turquoise	0.780213	368.97	262.069	106.901	155.168	0.780213	0.468859	maturase, putative, expressed
LOC_Os06g51460	turquoise	0.829189	866.646	665.273	201.373	463.901	0.829189	0.675674	white-brown complex homolog protein, putative, expressed
LOC_Os08g41780	turquoise	0.906579	1002.5	646.876	355.628	291.248	0.906579	0.778233	triacylglycerol lipase precursor, putative, expressed
LOC_Os09g24230	turquoise	0.984277	1995.19	1194.06	801.133	392.922	0.984277	0.748306	haloacid dehalogenase-like hydrolase family protein, putative, expressed
LOC_Os08g41790	turquoise	0.414441	85.7872	22.8496	62.9376	-40.088	0.414441	0.445186	phosphoribulokinase/Uridine kinase family protein, expressed
LOC_Os06g51400	turquoise	0.603411	138.063	68.515	69.5482	-1.0332	0.603411	0.504762	expressed protein
LOC_Os01g45620	turquoise	0.876853	971.969	763.934	208.035	555.9	0.876853	0.655743	CGMC_MAPKCMGC_2.5 - CGMC includes CDA, MAPK, GSK3, and CLKC kinases, expressed
LOC_Os03g16740	turquoise	0.74214	565.447	262.811	302.635	-39.8242	0.74214	0.344503	protein kinase APK1A, chloroplast precursor, putative, expressed
LOC_Os01g01302	turquoise	0.71479	487.903	206.642	281.262	-74.62	0.71479	0.618475	shikimate kinase, putative, expressed
LOC_Os02g10210	turquoise	0.521384	63.7477	29.2888	34.4589	-5.17011	0.521384	0.243743	expressed protein
LOC_Os03g16790	turquoise	0.704952	310.907	177.7	133.207	44.4932	0.704952	0.752086	DHHC zinc finger domain containing protein, expressed
LOC_Os02g33790	turquoise	0.488422	67.4675	26.1522	41.3153	-15.1631	0.488422	0.211999	expressed protein
LOC_Os04g26230	turquoise	0.913424	1211.58	906.381	305.196	601.185	0.913424	0.72397	pollen allergen, putative, expressed
LOC_Os02g10240	turquoise	0.496584	56.7324	23.3353	33.3971	-10.0618	0.496584	0.346002	ZOS2-05 - C2H2 zinc finger protein, expressed
LOC_Os04g26220	turquoise	0.95871	1485.5	1045.19	440.307	604.885	0.95871	0.717874	pollen allergen, putative, expressed
LOC_Os09g20010	turquoise	0.665181	380.328	136.098	244.23	-108.133	0.665181	0.375008	SNF1-related protein kinase regulatory subunit beta-2, putative, expressed
LOC_Os01g52214	turquoise	0.891621	1536.27	736.279	799.995	-63.7165	0.891621	0.814949	ubiquinone oxidoreductase, putative, expressed
LOC_Os03g21800	turquoise	0.949406	1420.99	1073.82	347.174	726.641	0.949406	0.726736	bZIP transcription factor family protein, putative, expressed
LOC_Os08g19830	turquoise	0.675771	436.41	182.461	253.948	-71.4867	0.675771	0.457473	ubiquitin family protein, putative, expressed
LOC_Os01g52130	turquoise	0.98918	1783.61	1165.76	617.851	547.911	0.98918	0.714111	sulfate transporter, putative, expressed
LOC_Os03g60950	turquoise	0.306294	97.6618	32.5557	65.1061	-32.5503	0.306294	0.0622543	expressed protein
LOC_Os07g12490	turquoise	0.889659	1335.73	643.748	691.982	-48.2341	0.889659	0.757918	KH domain containing protein, putative, expressed
LOC_Os02g33830	turquoise	0.95039	1622.65	949.056	673.59	275.467	0.95039	0.675679	expressed protein
LOC_Os02g10300	turquoise	0.955271	1583.7	1083.5	500.205	583.295	0.955271	0.769296	polygalacturonase, putative, expressed
LOC_Os01g52160	turquoise	0.382835	48.8637	13.4275	35.4362	-22.0087	0.382835	0.267437	heavy metal-associated domain containing protein, expressed
LOC_Os03g21880	turquoise	0.955981	1481.16	1088.64	392.52	696.123	0.955981	0.765831	THION28 - Plant thionin family protein precursor, expressed
LOC_Os10g09090	turquoise	0.88368	1000.73	676.972	323.756	353.215	0.88368	0.763631	cytochrome P450, putative, expressed
LOC_Os03g60910	turquoise	0.730219	598.103	224.662	373.441	-148.779	0.730219	0.63747	PPR repeat domain containing protein, putative, expressed
LOC_Os07g12400	turquoise	0.50066	134.863	61.6819	73.181	-11.4991	0.50066	0.547454	expressed protein
LOC_Os08g41750	turquoise	0.857146	1134.01	555.928	578.084	-22.1557	0.857146	0.64781	OsFBX303 - F-box domain containing protein, expressed
LOC_Os02g02560	turquoise	0.988636	1851.86	1245.33	606.535	638.791	0.988636	0.761927	UTP--glucose-1-phosphate uridylyltransferase, putative, expressed
LOC_Os08g41740	turquoise	0.94432	1561.45	891.898	669.551	222.347	0.94432	0.66981	cystathionin beta synthase protein, putative, expressed
LOC_Os09g24320	turquoise	0.879234	1185.28	652.162	533.115	119.048	0.879234	0.656352	2-oxo acid dehydrogenases acyltransferase domain containing protein, expressed
LOC_Os08g41730	turquoise	0.726701	575.785	268.382	307.402	-39.0199	0.726701	0.368948	peptidase, T1 family, putative, expressed
LOC_Os02g02590	turquoise	0.76175	522.481	327.626	194.854	132.772	0.76175	0.768596	PPR repeat domain containing protein, putative, expressed
LOC_Os08g41710	turquoise	0.706653	379.231	171.881	207.35	-35.4684	0.706653	0.648421	FHA domain containing protein, putative, expressed
LOC_Os06g48880	turquoise	0.790054	429.943	291.199	138.744	152.456	0.790054	0.397825	expressed protein
LOC_Os12g22630	turquoise	0.799736	759.458	397.668	361.789	35.8789	0.799736	0.775798	retrotransposon protein, putative, unclassified, expressed
LOC_Os10g09000	turquoise	0.77887	722.477	450.699	271.778	178.921	0.77887	0.650764	expressed protein
LOC_Os06g51390	turquoise	0.831472	902.844	562.267	340.577	221.69	0.831472	0.729351	expressed protein
LOC_Os06g30460	turquoise	0.85475	1094.75	567.724	527.028	40.6956	0.85475	0.543002	2-oxo acid dehydrogenases acyltransferase domain containing protein, expressed
LOC_Os04g55040	turquoise	0.76249	569.286	285.822	283.464	2.35795	0.76249	0.779729	vacuolar ATP synthase subunit D 1, putative, expressed
LOC_Os04g49739	turquoise	0.961179	1627.24	1149.8	477.44	672.356	0.961179	0.773606	purine permease, putative, expressed
LOC_Os03g38500	turquoise	0.732329	479.609	217.988	261.621	-43.6331	0.732329	0.539128	expressed protein
LOC_Os04g55070	turquoise	0.493396	132.783	44.4317	88.3515	-43.9199	0.493396	0.542386	gibberellin 20 oxidase 2, putative, expressed
LOC_Os06g48510	turquoise	0.429708	56.711	17.4032	39.3078	-21.9046	0.429708	0.0707317	choline monooxygenase, chloroplast precursor, putative, expressed
LOC_Os06g48520	turquoise	0.341789	25.2448	7.56562	17.6792	-10.1136	0.341789	0.205101	disease resistance protein RPM1, putative, expressed
LOC_Os03g30092	turquoise	0.772859	597.099	288.257	308.842	-20.5855	0.772859	0.681131	expressed protein
LOC_Os03g14000	turquoise	0.857355	1032.8	525.218	507.586	17.6321	0.857355	0.436532	acyl CoA binding protein, putative, expressed
LOC_Os09g36660	turquoise	0.792049	623.797	348.277	275.52	72.7579	0.792049	0.628357	expressed protein
LOC_Os02g52560	turquoise	0.617519	268.493	111.794	156.699	-44.9056	0.617519	0.0996238	xyloglucan fucosyltransferase, putative, expressed
LOC_Os04g33400	turquoise	0.545561	129.9	46.4933	83.4071	-36.9138	0.545561	0.405713	OsFBLD2 - F-box, LRR and FBD domain containing protein, expressed
LOC_Os03g38570	turquoise	0.583385	206.901	89.3362	117.565	-28.2288	0.583385	0.673927	retrotransposon protein, putative, unclassified, expressed
LOC_Os01g69230	turquoise	0.758344	510.398	245.034	265.364	-20.3296	0.758344	0.375409	exo70 exocyst complex subunit domain containing protein, expressed
LOC_Os02g45710	turquoise	0.676328	391.205	145.466	245.739	-100.273	0.676328	0.752328	zinc finger, C3HC4 type domain containing protein, expressed
LOC_Os03g46884	turquoise	0.760996	637.791	276.332	361.459	-85.1265	0.760996	0.53017	transposon protein, putative, CACTA, En/Spm sub-class, expressed
LOC_Os01g69240	turquoise	0.975512	1854.4	1126.12	728.281	397.836	0.975512	0.800222	CBS domain containing membrane protein, putative, expressed
LOC_Os06g44250	turquoise	0.716892	554.349	216.883	337.466	-120.583	0.716892	0.758147	haemolysin-III, putative, expressed
LOC_Os04g45160	turquoise	0.525915	65.4791	27.254	38.2251	-10.971	0.525915	0.308663	DTA2, putative, expressed
LOC_Os04g33460	turquoise	0.474115	171.794	57.1622	114.632	-57.4697	0.474115	0.423163	1,4-alpha-glucan-branching enzyme 2, chloroplast precursor, putative, expressed
LOC_Os10g04810	turquoise	0.671004	239.849	134.794	105.055	29.7393	0.671004	0.51071	retrotransposon protein, putative, Ty3-gypsy subclass
LOC_Os06g09230	turquoise	0.928169	1324.53	1010.42	314.105	696.316	0.928169	0.734715	serine threonine kinase, putative, expressed
LOC_Os05g22930	turquoise	0.660112	262.126	117.181	144.944	-27.7632	0.660112	0.326532	CAAX amino terminal protease family protein, putative, expressed
LOC_Os07g20240	turquoise	0.739856	504.725	242.855	261.87	-19.0157	0.739856	0.593798	transposon protein, putative, unclassified, expressed
LOC_Os05g43450	turquoise	0.810051	923.121	428.027	495.094	-67.0669	0.810051	0.450313	transcription initiation factor IIF beta subunit, putative, expressed
LOC_Os07g49250	turquoise	0.942876	1584.2	999.386	584.811	414.575	0.942876	0.778845	thiamine pyrophosphate enzyme, C-terminal TPP binding domain containing protein, expressed
LOC_Os01g40570	turquoise	0.901104	1296.71	698.839	597.875	100.964	0.901104	0.562045	outer mitochondrial membrane porin, putative, expressed
LOC_Os12g01810	turquoise	0.643173	106.386	76.3537	30.032	46.3218	0.643173	0.542495	expressed protein
LOC_Os07g20270	turquoise	0.972206	1532.85	1134.46	398.396	736.06	0.972206	0.718217	expressed protein
LOC_Os10g04780	turquoise	0.201508	19.991	4.65995	15.3311	-10.6711	0.201508	0.193558	OsFBX363 - F-box domain containing protein, expressed
LOC_Os06g09290	turquoise	0.50646	148.452	62.8067	85.6452	-22.8385	0.50646	0.378717	26S protease regulatory subunit 7, putative, expressed
LOC_Os12g01820	turquoise	0.897079	1061.75	795.246	266.504	528.741	0.897079	0.639387	ATCHX, putative, expressed
LOC_Os09g32150	turquoise	0.837254	822.095	458.366	363.728	94.6377	0.837254	0.60076	expressed protein
LOC_Os12g01830	turquoise	0.743856	471.944	209.032	262.912	-53.8803	0.743856	0.517291	staphylococcal nuclease homologue, putative, expressed
LOC_Os01g40540	turquoise	0.753821	436.912	239.528	197.384	42.1445	0.753821	0.541116	lectin receptor-type protein kinase, putative, expressed
LOC_Os03g46790	turquoise	0.692004	273.468	146.02	127.449	18.5711	0.692004	0.704538	helix-loop-helix DNA-binding domain containing protein, expressed
LOC_Os12g38570	turquoise	0.87178	1073.35	589.994	483.359	106.635	0.87178	0.430513	transmembrane amino acid transporter protein, putative, expressed
LOC_Os01g57550	turquoise	0.570089	364.984	142.144	222.841	-80.697	0.570089	0.220492	nodulation protein-related, putative, expressed
LOC_Os07g49210	turquoise	0.865296	786.596	568.483	218.113	350.37	0.865296	0.553247	helicase conserved C-terminal domain containing protein, expressed
LOC_Os03g42520	turquoise	0.812979	654.45	370.829	283.621	87.2083	0.812979	0.647304	expressed protein
LOC_Os06g30500	turquoise	0.444323	161.871	53.4184	108.453	-55.0345	0.444323	0.109127	cytochrome P450, putative, expressed
LOC_Os12g38540	turquoise	0.761844	426.319	245.375	180.945	64.4298	0.761844	0.501715	expressed protein
LOC_Os01g45990	turquoise	0.826943	1249.6	504.766	744.83	-240.064	0.826943	0.851778	potassium channel AKT1, putative, expressed
LOC_Os06g48500	turquoise	0.556396	104.422	81.9461	22.4763	59.4698	0.556396	0.416903	expressed protein
LOC_Os04g49650	turquoise	0.866759	1011.87	804.036	207.831	596.205	0.866759	0.680829	DUF581 domain containing protein, expressed
LOC_Os03g53190	turquoise	0.611445	194.98	93.0991	101.881	-8.78173	0.611445	0.422292	Core histone H2A/H2B/H3/H4 domain containing protein, putative, expressed
LOC_Os02g22160	turquoise	0.949777	1559.91	1019.88	540.027	479.853	0.949777	0.746951	DNA binding protein, putative, expressed
LOC_Os03g30160	turquoise	0.494677	44.9145	26.6362	18.2783	8.35787	0.494677	0.271305	OsFBK13 - F-box domain and kelch repeat containing protein, expressed
LOC_Os08g45120	turquoise	0.308728	20.4566	6.2686	14.188	-7.91939	0.308728	0.189899	expressed protein
LOC_Os04g49660	turquoise	0.504081	79.9708	35.8375	44.1333	-8.29581	0.504081	0.580127	DUF581 domain containing protein, expressed
LOC_Os04g49620	turquoise	0.587467	192.838	90.3056	102.533	-12.2273	0.587467	0.35984	DUF581 domain containing protein, expressed
LOC_Os07g28614	turquoise	0.5477	137.133	43.0227	94.1106	-51.0878	0.5477	0.502489	expressed protein
LOC_Os02g52640	turquoise	0.950987	1434.4	942.556	491.847	450.708	0.950987	0.715884	xyloglucan fucosyltransferase, putative, expressed
LOC_Os06g30310	turquoise	0.787332	497.528	382.363	115.165	267.198	0.787332	0.616986	alpha-glucan water dikinase, chloroplast precursor, putative, expressed
LOC_Os01g45910	turquoise	0.830655	588.708	431.488	157.221	274.267	0.830655	0.718194	plastidic ATP/ADP-transporter, putative, expressed
LOC_Os03g38640	turquoise	0.536465	86.6908	32.8076	53.8832	-21.0756	0.536465	0.167972	expressed protein
LOC_Os06g39270	turquoise	0.50778	110.137	46.8095	63.3273	-16.5178	0.50778	0.229613	UDP-glucoronosyl and UDP-glucosyl transferase domain containing protein, expressed
LOC_Os02g52610	turquoise	0.951914	1629.79	1120.27	509.519	610.749	0.951914	0.798547	xyloglucan fucosyltransferase, putative, expressed
LOC_Os07g28640	turquoise	0.167465	18.2829	4.3229	13.96	-9.63714	0.167465	0.0730454	expressed protein
LOC_Os04g33530	turquoise	0.496222	71.8088	19.8411	51.9677	-32.1266	0.496222	0.240107	Ser/Thr protein phosphatase family protein, putative, expressed
LOC_Os06g48680	turquoise	0.627292	165.025	86.0103	79.0145	6.9958	0.627292	0.416813	expressed protein
LOC_Os06g30380	turquoise	0.73505	710.438	261.442	448.996	-187.555	0.73505	0.783649	GTP binding protein, putative, expressed
LOC_Os05g22870	turquoise	0.598351	186.794	85.3854	101.408	-16.0231	0.598351	0.383955	PPR repeat domain containing protein, putative, expressed
LOC_Os08g41080	turquoise	0.940661	1666.7	1004.54	662.16	342.385	0.940661	0.756947	expressed protein
LOC_Os04g55110	turquoise	0.8424	940.688	712.691	227.997	484.695	0.8424	0.624202	expressed protein
LOC_Os03g09080	turquoise	0.962249	1615.19	1012.13	603.054	409.078	0.962249	0.777503	ubiquitin carboxyl-terminal hydrolase domain containing protein, expressed
LOC_Os07g20400	turquoise	0.545679	108.763	43.2714	65.4916	-22.2203	0.545679	0.629558	retrotransposon, putative, centromere-specific, expressed
LOC_Os11g02000	turquoise	0.636007	265.862	129.494	136.368	-6.8743	0.636007	0.441215	retrotransposon protein, putative, unclassified, expressed
LOC_Os11g02010	turquoise	0.815868	722.023	393.599	328.424	65.1745	0.815868	0.59772	transposon protein, putative, CACTA, En/Spm sub-class, expressed
LOC_Os03g09020	turquoise	0.833592	606.623	403.674	202.949	200.725	0.833592	0.405404	dehydrogenase, putative, expressed
LOC_Os05g43380	turquoise	0.706041	404.548	218.527	186.022	32.5049	0.706041	0.745022	tesmin/TSO1-like CXC domain containing protein, expressed
LOC_Os03g38650	turquoise	0.641302	334.98	125.183	209.797	-84.6135	0.641302	0.464315	expressed protein
LOC_Os11g02020	turquoise	0.717098	410.722	191.104	219.618	-28.5145	0.717098	0.458388	retrotransposon protein, putative, Ty3-gypsy subclass, expressed
LOC_Os05g50220	turquoise	0.875852	1158.22	584.743	573.476	11.2669	0.875852	0.668205	pex14, putative, expressed
LOC_Os01g40390	turquoise	0.404337	21.6584	8.43958	13.2188	-4.77925	0.404337	0.273042	phosphatase-associated family protein, putative, expressed
LOC_Os01g57490	turquoise	0.565603	137.246	73.957	63.2892	10.6678	0.565603	0.549264	D-mannose binding lectin family protein, expressed
LOC_Os04g45280	turquoise	0.676831	216.761	130.344	86.4164	43.9279	0.676831	0.441063	histidine triad family protein, putative, expressed
LOC_Os05g43390	turquoise	0.540569	191.804	97.7099	94.0946	3.61531	0.540569	0.0699373	signal recognition particle 54 kDa protein, putative, expressed
LOC_Os06g44140	turquoise	0.806127	825.233	374.172	451.061	-76.8892	0.806127	0.720146	transmembrane 9 superfamily member, putative, expressed
LOC_Os10g04700	turquoise	0.471468	61.5928	19.6071	41.9857	-22.3786	0.471468	0.369055	OsFBX361 - F-box domain containing protein, expressed
LOC_Os04g45290	turquoise	0.921178	1405.29	873.12	532.167	340.953	0.921178	0.774139	glycosyl hydrolases, putative, expressed
LOC_Os12g01910	turquoise	0.620492	303.961	148.231	155.73	-7.49865	0.620492	0.695954	pentatricopeptide, putative, expressed
LOC_Os06g44160	turquoise	0.802539	623.268	332.148	291.12	41.028	0.802539	0.606812	heat shock protein DnaJ, putative, expressed
LOC_Os09g32260	turquoise	0.352993	74.785	18.7989	55.9861	-37.1872	0.352993	0.453266	no apical meristem protein, putative, expressed
LOC_Os12g01916	turquoise	0.62916	395.393	114.174	281.219	-167.045	0.62916	0.674539	double-stranded RNA binding motif containing protein, expressed
LOC_Os02g45520	turquoise	0.715076	437.62	276.768	160.853	115.915	0.715076	0.547912	uncharacterized membrane protein, putative, expressed
LOC_Os01g01520	turquoise	0.462496	55.4798	23.952	31.5278	-7.57575	0.462496	0.26747	transferase family protein, putative, expressed
LOC_Os08g45060	turquoise	0.63698	183.807	89.5953	94.2116	-4.61628	0.63698	0.20681	protein Kinase-like protein TMKL1 precursor, putative, expressed
LOC_Os07g49100	turquoise	0.729125	499.171	393.778	105.393	288.385	0.729125	0.55957	pectinesterase, putative, expressed
LOC_Os03g42450	turquoise	0.730836	653.105	220.03	433.075	-213.044	0.730836	0.705686	expressed protein
LOC_Os01g57450	turquoise	0.76002	500.698	260.355	240.343	20.0116	0.76002	0.313113	universal stress protein domain containing protein, putative, expressed
LOC_Os06g44170	turquoise	0.758329	432.341	246.547	185.794	60.7524	0.758329	0.444075	NAD dependent epimerase/dehydratase family protein, putative, expressed
LOC_Os01g40470	turquoise	0.62277	269.158	101.331	167.827	-66.496	0.62277	0.78861	vacuolar ATP synthase subunit d, putative, expressed
LOC_Os01g40420	turquoise	0.880813	1402.01	697.004	705.011	-8.00661	0.880813	0.823518	CBS domain containing membrane protein, putative, expressed
LOC_Os07g20370	turquoise	0.591194	133.045	58.2033	74.8413	-16.638	0.591194	0.278502	retrotransposon, putative, centromere-specific, expressed
LOC_Os04g21890	turquoise	0.526601	95.391	43.9566	51.4344	-7.47775	0.526601	0.465862	disease resistance protein RPM1, putative, expressed
LOC_Os01g01560	turquoise	0.436621	45.52	27.8234	17.6965	10.1269	0.436621	0.365335	transposon protein, putative, unclassified, expressed
LOC_Os09g32290	turquoise	0.703591	286.662	185.212	101.451	83.7612	0.703591	0.384763	FAD dependent oxidoreductase domain containing protein, expressed
LOC_Os09g32280	turquoise	0.627384	168.614	78.3357	90.2787	-11.9429	0.627384	0.397843	thaumatin, putative, expressed
LOC_Os03g53220	turquoise	0.548749	78.2835	43.1607	35.1228	8.03798	0.548749	0.219924	U5 small nuclear ribonucleoprotein 200 kDa helicase, putative, expressed
LOC_Os08g41180	turquoise	0.645678	332.619	113.524	219.095	-105.571	0.645678	0.683422	MBTB31 - Bric-a-Brac, Tramtrack, Broad Complex BTB domain with Meprin and TRAF Homology MATH domain, expressed
LOC_Os12g01940	turquoise	0.630464	180.171	101.782	78.3882	23.3943	0.630464	0.374346	expressed protein
LOC_Os01g57410	turquoise	0.69996	360.625	166.595	194.03	-27.4347	0.69996	0.521744	pentatricopeptide repeat domain containing protein, putative, expressed
LOC_Os09g36460	turquoise	0.224443	25.1942	5.66161	19.5325	-13.8709	0.224443	0.297649	zinc RING finger protein, putative, expressed
LOC_Os09g29584	turquoise	0.416199	123.965	58.2492	65.7156	-7.46642	0.416199	0.565213	OsWAK84 - OsWAK receptor-like protein OsWAK-RLP, expressed
LOC_Os02g22070	turquoise	0.537963	117.409	42.1204	75.2888	-33.1684	0.537963	0.375088	expressed protein
LOC_Os09g36490	turquoise	0.592942	81.9531	49.6616	32.2915	17.3701	0.592942	0.49708	expressed protein
LOC_Os04g49540	turquoise	0.278065	75.5137	14.5553	60.9584	-46.4032	0.278065	0.194307	expressed protein
LOC_Os08g33600	turquoise	0.876902	869.256	592.026	277.23	314.796	0.876902	0.744417	retrotransposon protein, putative, unclassified, expressed
LOC_Os03g42480	turquoise	0.793065	707.979	343.257	364.722	-21.4655	0.793065	0.543522	expressed protein
LOC_Os07g49140	turquoise	0.866265	1621.02	629.615	991.406	-361.791	0.866265	0.8368	expressed protein
LOC_Os03g04950	turquoise	0.901912	1151.59	647.297	504.297	143	0.901912	0.773668	OsSub26 - Putative Subtilisin homologue, expressed
LOC_Os01g45840	turquoise	0.335437	42.2994	12.7429	29.5564	-16.8135	0.335437	0.182775	CRR2, putative, expressed
LOC_Os07g49150	turquoise	0.791149	812.872	432.656	380.216	52.4394	0.791149	0.873515	26S protease regulatory subunit 4, putative, expressed
LOC_Os11g02300	turquoise	0.662274	300.277	148.06	152.217	-4.15729	0.662274	0.38027	CPuORF36 - conserved peptide uORF-containing transcript, expressed
LOC_Os11g02305	turquoise	0.593203	224.193	97.986	126.207	-28.2208	0.593203	0.279356	expressed protein
LOC_Os06g48330	turquoise	0.669874	255.607	124.916	130.69	-5.77427	0.669874	0.24982	ATEXO70G1, putative, expressed
LOC_Os05g50170	turquoise	0.97144	1539.77	1110.47	429.296	681.176	0.97144	0.672289	ATPCME, putative, expressed
LOC_Os02g52300	turquoise	0.639956	220.446	110.852	109.594	1.25878	0.639956	0.59658	CPuORF38 - conserved peptide uORF-containing transcript, expressed
LOC_Os02g52316	turquoise	0.578929	75.1079	41.1401	33.9678	7.17233	0.578929	0.527297	BTB/POZ domain containing protein, putative, expressed
LOC_Os04g33640	turquoise	0.731044	620.514	228.556	391.957	-163.401	0.731044	0.774912	glycosyl hydrolases family 17, putative, expressed
LOC_Os06g48320	turquoise	0.932722	1132.69	844.377	288.31	556.067	0.932722	0.701577	EDR2, putative, expressed
LOC_Os04g33660	turquoise	0.572976	455.065	165.966	289.099	-123.134	0.572976	0.172895	bifunctional monodehydroascorbate reductase and carbonic anhydrasenectarin-3 precursor, putative, expressed
LOC_Os06g48300	turquoise	0.935091	1447.56	1042.99	404.57	638.419	0.935091	0.710227	protein phosphatase 2C, putative, expressed
LOC_Os01g34100	turquoise	0.306584	46.6744	11.0012	35.6732	-24.672	0.306584	0.0132312	expressed protein
LOC_Os01g69090	turquoise	0.728011	596.333	399.478	196.856	202.622	0.728011	0.571455	CBS domain-containing protein, putative, expressed
LOC_Os04g33680	turquoise	0.629575	183.492	97.007	86.4847	10.5223	0.629575	0.365473	glutaredoxin, putative, expressed
LOC_Os02g02840	turquoise	0.83977	998.216	510.779	487.437	23.3425	0.83977	0.518549	ras-related protein, putative, expressed
LOC_Os01g69020	turquoise	0.950717	1538.16	1010.29	527.874	482.412	0.950717	0.830921	retrotransposon protein, putative, unclassified, expressed
LOC_Os02g19540	turquoise	0.414505	64.6176	20.3434	44.2742	-23.9308	0.414505	0.0526033	OsFBX47 - F-box domain containing protein, expressed
LOC_Os01g69030	turquoise	0.962541	1783.68	1036.18	747.499	288.684	0.962541	0.753886	sucrose-phosphate synthase, putative, expressed
LOC_Os03g46600	turquoise	0.60412	465.476	190.836	274.641	-83.8054	0.60412	0.296259	acidic leucine-rich nuclear phosphoprotein 32-related protein 2, putative, expressed
LOC_Os05g50120	turquoise	0.967968	1597.55	1174.67	422.876	751.797	0.967968	0.751216	CGMC_MAPKCMGC_2.3 - CGMC includes CDA, MAPK, GSK3, and CLKC kinases, expressed
LOC_Os01g69040	turquoise	0.688851	341.49	157.229	184.261	-27.0314	0.688851	0.633348	zinc finger, C3HC4 type domain containing protein, expressed
LOC_Os05g50110	turquoise	0.894333	1472.26	830.475	641.785	188.69	0.894333	0.782078	oleosin, putative, expressed
LOC_Os09g29825	turquoise	0.604506	86.4158	64.1833	22.2325	41.9509	0.604506	0.396887	pentatricopeptide, putative, expressed
LOC_Os02g45940	turquoise	0.546916	189.565	63.7413	125.823	-62.0821	0.546916	0.566468	Core histone H2A/H2B/H3/H4 domain containing protein, putative, expressed
LOC_Os05g18730	turquoise	0.951291	1564.32	953.091	611.227	341.864	0.951291	0.756553	generative cell specific-1, putative, expressed
LOC_Os05g50140	turquoise	0.94141	1861.37	916.815	944.55	-27.7347	0.94141	0.751209	auxin efflux carrier component, putative, expressed
LOC_Os02g52340	turquoise	0.837062	887.099	456.532	430.567	25.965	0.837062	0.467299	OsMADS22 - MADS-box family gene with MIKCc type-box, expressed
LOC_Os05g18740	turquoise	0.719103	315.074	187.801	127.273	60.5272	0.719103	0.670858	retrotransposon protein, putative, unclassified, expressed
LOC_Os06g09490	turquoise	0.76667	346.062	249.409	96.6525	152.757	0.76667	0.591892	retrotransposon protein, putative, unclassified, expressed
LOC_Os05g50160	turquoise	0.858852	951.347	690.557	260.79	429.766	0.858852	0.754445	DUF617 domain containing protein, expressed
LOC_Os06g22980	turquoise	0.871624	1006.93	777.584	229.347	548.236	0.871624	0.640155	CSLD5 - cellulose synthase-like family D, expressed
LOC_Os04g49490	turquoise	0.784864	655.826	350.994	304.832	46.1626	0.784864	0.679085	protein phosphatase 2C, putative, expressed
LOC_Os02g22300	turquoise	0.657862	157.149	94.9145	62.2346	32.6799	0.657862	0.511354	retrotransposon protein, putative, Ty3-gypsy subclass
LOC_Os03g04890	turquoise	0.971288	1856.92	1064.93	791.997	272.93	0.971288	0.717237	zinc finger family protein, putative, expressed
LOC_Os03g46550	turquoise	0.782286	663.447	301.31	362.137	-60.8268	0.782286	0.427619	RGH1A, putative, expressed
LOC_Os02g15270	turquoise	0.369694	233.706	77.2682	156.438	-79.1696	0.369694	0.0173839	tyrosine-protein phosphatase YVH1, putative, expressed
LOC_Os04g45010	turquoise	0.92672	1421.22	1030.28	390.933	639.35	0.92672	0.744621	OsPLIM2b - LIM domain protein, putative actin-binding protein and transcription factor, expressed
LOC_Os08g33740	turquoise	0.730683	352.138	252.67	99.4676	153.202	0.730683	0.679853	CSLA11 - cellulose synthase-like family A, expressed
LOC_Os12g40910	turquoise	0.565815	178.148	58.4568	119.691	-61.2342	0.565815	0.446091	expressed protein
LOC_Os02g45890	turquoise	0.630989	262.612	94.0738	168.538	-74.4647	0.630989	0.62961	sulfotransferase domain containing protein, expressed
LOC_Os06g22960	turquoise	0.828545	1005.02	539.612	465.407	74.2051	0.828545	0.608492	aquaporin protein, putative, expressed
LOC_Os01g01650	turquoise	0.599988	117.754	83.5218	34.2317	49.2901	0.599988	0.447299	isoflavone reductase homolog IRL, putative, expressed
LOC_Os08g41489	turquoise	0.471455	62.5349	17.6406	44.8943	-27.2536	0.471455	0.509911	expressed protein
LOC_Os02g02900	turquoise	0.481578	60.3793	30.9284	29.4509	1.4775	0.481578	0.365423	expressed protein
LOC_Os08g41470	turquoise	0.282917	86.3012	22.8591	63.4422	-40.5831	0.282917	0.194185	proteophosphoglycan ppg4, putative, expressed
LOC_Os03g04830	turquoise	0.931245	1552.7	821.213	731.492	89.7205	0.931245	0.646696	expressed protein
LOC_Os09g05030	turquoise	0.300274	93.8684	26.413	67.4555	-41.0425	0.300274	0.011245	armadillo/beta-catenin-like repeat family protein, expressed
LOC_Os09g36350	turquoise	0.940297	1900.87	888.413	1012.46	-124.049	0.940297	0.811952	endoglucanase, putative, expressed
LOC_Os03g04840	turquoise	0.282737	161.408	48.9097	112.498	-63.5881	0.282737	0.197663	expressed protein
LOC_Os02g22374	turquoise	0.739056	429.435	206.473	222.962	-16.489	0.739056	0.516796	expressed protein
LOC_Os01g01610	turquoise	0.840998	851.471	512.196	339.275	172.921	0.840998	0.721101	IscA-like iron-sulfur assembly protein, mitochondrial precursor, putative, expressed
LOC_Os07g49040	turquoise	0.936202	1492.33	821.002	671.323	149.679	0.936202	0.768674	protein phosphotase protein, putative, expressed
LOC_Os09g36370	turquoise	0.699112	720.865	286.87	433.995	-147.126	0.699112	0.735763	ER lumen protein retaining receptor containing protein, expressed
LOC_Os12g01680	turquoise	0.651291	210.33	139.849	70.4809	69.3685	0.651291	0.553997	macrophage migration inhibitory factor, putative, expressed
LOC_Os12g01620	turquoise	0.814341	675.298	403.452	271.845	131.607	0.814341	0.793234	expressed protein
LOC_Os07g49070	turquoise	0.574479	76.2801	48.4389	27.8411	20.5978	0.574479	0.451033	expressed protein
LOC_Os09g05080	turquoise	0.364392	22.0917	6.79943	15.2923	-8.49283	0.364392	0.337461	retrotransposon protein, putative, unclassified, expressed
LOC_Os01g57740	turquoise	0.460654	82.5428	33.8182	48.7246	-14.9065	0.460654	0.586236	expressed protein
LOC_Os08g41400	turquoise	0.839693	1188.82	494.214	694.604	-200.39	0.839693	0.454249	expressed protein
LOC_Os06g39050	turquoise	0.825923	848.703	669.799	178.904	490.895	0.825923	0.643061	syntaxin, putative, expressed
LOC_Os11g06690	turquoise	0.966448	1497.69	1117.78	379.912	737.869	0.966448	0.736894	serine esterase family protein, putative, expressed
LOC_Os09g29780	turquoise	0.487006	59.8808	28.8152	31.0656	-2.25035	0.487006	0.501982	expressed protein
LOC_Os12g40880	turquoise	0.539984	220.587	81.4276	139.159	-57.7314	0.539984	0.462884	phosphoribulokinase/Uridine kinase family protein, expressed
LOC_Os07g28440	turquoise	0.818815	785.639	430.36	355.279	75.0816	0.818815	0.808717	SNARE associated Golgi protein, putative, expressed
LOC_Os06g39060	turquoise	0.9486	1535.35	1120.87	414.482	706.384	0.9486	0.758575	glucan endo-1,3-beta-glucosidase precursor, putative, expressed
LOC_Os08g10244	turquoise	0.258748	19.6755	4.02749	15.648	-11.6205	0.258748	0.110351	retrotransposon protein, putative, unclassified, expressed
LOC_Os11g06650	turquoise	0.314179	92.3233	23.5128	68.8106	-45.2978	0.314179	0.0730264	transcription elongation factor protein, putative, expressed
LOC_Os06g39000	turquoise	0.813412	548.026	399.209	148.817	250.392	0.813412	0.543217	expressed protein
LOC_Os05g13440	turquoise	0.492344	239.361	91.4516	147.91	-56.458	0.492344	0.103192	coiled-coil domain-containing protein 25, putative, expressed
LOC_Os12g38820	turquoise	0.812062	718.73	375.646	343.084	32.5625	0.812062	0.699285	expressed protein
LOC_Os11g06670	turquoise	0.865192	729.551	503.261	226.289	276.972	0.865192	0.510437	expressed protein
LOC_Os04g33780	turquoise	0.658806	391.063	153.817	237.246	-83.4293	0.658806	0.503283	OTU-like cysteine protease family protein, putative, expressed
LOC_Os07g28400	turquoise	0.503672	136.108	47.562	88.5456	-40.9837	0.503672	0.702469	CDGSH iron sulfur domain-containing protein 1, putative, expressed
LOC_Os09g29760	turquoise	0.389936	56.2203	18.2545	37.9658	-19.7113	0.389936	0.12802	expressed protein
LOC_Os05g13420	turquoise	0.941382	1672.85	921.085	751.762	169.322	0.941382	0.795153	large tegument protein, putative, expressed
LOC_Os01g40130	turquoise	0.913701	1132.11	770.095	362.017	408.078	0.913701	0.674082	retrotransposon protein, putative, unclassified, expressed
LOC_Os04g45070	turquoise	0.738058	441.258	231.233	210.025	21.2083	0.738058	0.49308	remorin, putative, expressed
LOC_Os06g09350	turquoise	0.706203	340.368	162.124	178.243	-16.1189	0.706203	0.393693	expressed protein
LOC_Os02g19650	turquoise	0.810577	527.224	374.456	152.768	221.687	0.810577	0.615211	hydrolase, alpha/beta fold family domain containing protein, expressed
LOC_Os05g13400	turquoise	0.552836	94.1838	45.8022	48.3816	-2.57942	0.552836	0.457105	retrotransposon protein, putative, unclassified, expressed
LOC_Os01g40150	turquoise	0.947463	1331	987.48	343.523	643.957	0.947463	0.737269	eukaryotic translation initiation factor 5B, putative, expressed
LOC_Os07g16040	turquoise	0.705099	357.061	208.885	148.176	60.7082	0.705099	0.656207	erythronate-4-phosphate dehydrogenase domain containing protein, expressed
LOC_Os03g46740	turquoise	0.66388	275.937	121.836	154.101	-32.265	0.66388	0.55283	ABC transporter, ATP-binding protein, putative, expressed
LOC_Os02g45870	turquoise	0.869215	866.995	590.24	276.755	313.485	0.869215	0.746923	tobamovirus multiplication protein, putative, expressed
LOC_Os06g39090	turquoise	0.688285	246.656	130.968	115.687	15.2812	0.688285	0.344624	transposon protein, putative, unclassified, expressed
LOC_Os11g02200	turquoise	0.566643	182.138	74.5612	107.576	-33.0152	0.566643	0.211871	expressed protein
LOC_Os06g09390	turquoise	0.838299	696.712	422.542	274.17	148.373	0.838299	0.458573	AP2 domain containing protein, expressed
LOC_Os02g52450	turquoise	0.844868	735.021	463.522	271.499	192.024	0.844868	0.666994	regulator of ribonuclease, putative, expressed
LOC_Os03g46780	turquoise	0.655091	236.565	118.59	117.976	0.61417	0.655091	0.405424	expressed protein
LOC_Os05g50020	turquoise	0.911227	1136.48	699.119	437.362	261.757	0.911227	0.646431	expressed protein
LOC_Os03g04770	turquoise	0.960768	1783.56	1169.46	614.094	555.367	0.960768	0.823262	beta-amylase, putative, expressed
LOC_Os07g20130	turquoise	0.401944	289.715	98.3971	191.318	-92.9207	0.401944	0.0186033	MATH domain containing protein, expressed
LOC_Os10g31930	turquoise	0.529023	148.981	56.7465	92.2345	-35.4881	0.529023	0.552179	shugoshin-1, putative, expressed
LOC_Os05g43520	turquoise	0.694024	425.707	187.649	238.058	-50.4085	0.694024	0.347844	BSD, putative, expressed
LOC_Os05g18950	turquoise	0.279086	99.3169	26.6151	72.7018	-46.0866	0.279086	0.0395037	pentatricopeptide, putative, expressed
LOC_Os09g32030	turquoise	0.85128	992.308	485.631	506.677	-21.0455	0.85128	0.685024	expressed protein
LOC_Os05g43540	turquoise	0.544198	285.868	143.889	141.979	1.90966	0.544198	0.637273	transmembrane protein 56, putative, expressed
LOC_Os02g45770	turquoise	0.818839	675.035	365.309	309.726	55.5829	0.818839	0.694504	OsMADS6 - MADS-box family gene with MIKCc type-box, expressed
LOC_Os11g15750	turquoise	0.357039	71.6646	17.1411	54.5235	-37.3824	0.357039	0.0938484	retrotransposon protein, putative, unclassified, expressed
LOC_Os02g15120	turquoise	0.643608	344.968	126.781	218.187	-91.4058	0.643608	0.635003	RING-H2 finger protein, putative, expressed
LOC_Os10g04450	turquoise	0.476128	74.3347	28.8735	45.4612	-16.5877	0.476128	0.27519	expressed protein
LOC_Os01g40240	turquoise	0.453957	55.0304	16.0056	39.0248	-23.0192	0.453957	0.43885	expressed protein
LOC_Os09g36280	turquoise	0.809187	824.812	529.877	294.934	234.943	0.809187	0.852208	glycosyl hydrolases family 17, putative, expressed
LOC_Os11g02180	turquoise	0.922923	1289.17	903.965	385.206	518.759	0.922923	0.807524	dual specificity protein phosphatase, putative, expressed
LOC_Os01g01740	turquoise	0.822086	657.922	383.528	274.394	109.134	0.822086	0.406168	protein kinase domain containing protein, expressed
LOC_Os08g33860	turquoise	0.968656	1646.7	1195.06	451.638	743.424	0.968656	0.787742	zinc finger, C3HC4 type, putative, expressed
LOC_Os03g42230	turquoise	0.90465	1151.71	697.342	454.37	242.972	0.90465	0.625178	B3 DNA binding domain containing protein, expressed
LOC_Os08g41320	turquoise	0.587403	397.359	142.9	254.459	-111.56	0.587403	0.209343	BHLH transcription factor, putative, expressed
LOC_Os11g06720	turquoise	0.748715	522.841	234.752	288.089	-53.3375	0.748715	0.719124	abscisic stress-ripening, putative, expressed
LOC_Os01g01710	turquoise	0.839297	847.686	452.378	395.308	57.0701	0.839297	0.678297	1-deoxy-D-xylulose 5-phosphate reductoisomerase, chloroplast precursor, putative, expressed
LOC_Os04g18690	turquoise	0.75461	474.14	236.699	237.441	-0.741831	0.75461	0.602433	retrotransposon protein, putative, Ty3-gypsy subclass, expressed
LOC_Os03g42259	turquoise	0.65503	187.22	125.09	62.1296	62.9605	0.65503	0.423724	hypervariable Bacillus group-specific protein, putative, expressed
LOC_Os08g10340	turquoise	0.662313	244.866	113.888	130.978	-17.0898	0.662313	0.227275	OsFBX278 - F-box domain containing protein, expressed
LOC_Os11g06740	turquoise	0.910852	1095.5	757.216	338.28	418.935	0.910852	0.613705	syntaxin 6, putative, expressed
LOC_Os12g38860	turquoise	0.70236	411.65	308.642	103.008	205.633	0.70236	0.551351	transposon protein, putative, unclassified, expressed
LOC_Os08g45200	turquoise	0.718999	301.292	192.498	108.794	83.7041	0.718999	0.471621	expressed protein
LOC_Os08g33810	turquoise	0.802921	731.241	382.836	348.405	34.4309	0.802921	0.423076	lipoate protein ligase, putative, expressed
LOC_Os04g33720	turquoise	0.779613	963.337	391.247	572.09	-180.842	0.779613	0.502482	glycosyl hydrolases, putative, expressed
LOC_Os07g20170	turquoise	0.835991	1177.29	508.144	669.147	-161.004	0.835991	0.658162	actin-depolymerizing factor, putative, expressed
LOC_Os01g57630	turquoise	0.285201	147.64	49.7671	97.873	-48.106	0.285201	0.0256665	pentatricopeptide containing protein, putative, expressed
LOC_Os08g45210	turquoise	0.849067	1255.53	489.455	766.073	-276.618	0.849067	0.691251	Mpv17 / PMP22 family domain containing protein, expressed
LOC_Os12g38880	turquoise	0.7918	850.626	359.724	490.902	-131.177	0.7918	0.774876	tetratricopeptide-like helical, putative, expressed
LOC_Os03g04740	turquoise	0.790868	777.575	332.482	445.093	-112.611	0.790868	0.698181	expressed protein
LOC_Os12g01730	turquoise	0.829933	823.414	429.987	393.427	36.5601	0.829933	0.862763	laccase-23 precursor, putative, expressed
LOC_Os03g42290	turquoise	0.848031	957.809	512.283	445.527	66.7558	0.848031	0.682718	B3 DNA binding domain containing protein, expressed
LOC_Os04g33700	turquoise	0.584286	129.178	59.2862	69.8918	-10.6055	0.584286	0.532949	ABC transmembrane transporter domain containing protein, expressed
LOC_Os08g10304	turquoise	0.561028	143.629	47.2681	96.361	-49.0929	0.561028	0.368518	expressed protein
LOC_Os08g45230	turquoise	0.933359	1554.91	1028.48	526.427	502.057	0.933359	0.788815	ENTH domain containing protein, expressed
LOC_Os11g06700	turquoise	0.979744	1808.67	1148.98	659.689	489.29	0.979744	0.769229	exo70 exocyst complex subunit, putative, expressed
LOC_Os04g33710	turquoise	0.921677	1208.03	890.973	317.058	573.914	0.921677	0.754459	expressed protein
LOC_Os03g42970	turquoise	0.627278	176.958	137.196	39.7621	97.4339	0.627278	0.456916	transposon protein, putative, unclassified, expressed
LOC_Os01g06000	turquoise	0.547532	142.137	51.2103	90.9262	-39.716	0.547532	0.395072	PPR repeat containing protein, expressed
LOC_Os01g65310	turquoise	0.660814	298.179	149.966	148.213	1.75367	0.660814	0.483749	DUF803 domain containing, putative, expressed
LOC_Os01g71210	turquoise	0.90659	1462.4	717.709	744.687	-26.9771	0.90659	0.851289	expressed protein
LOC_Os01g06010	turquoise	0.519322	209.699	69.8498	139.849	-69.9993	0.519322	0.500362	Core histone H2A/H2B/H3/H4 domain containing protein, putative, expressed
LOC_Os06g24540	turquoise	0.752018	653.24	255.098	398.142	-143.045	0.752018	0.427955	expressed protein
LOC_Os11g43820	turquoise	0.819199	938.114	425.388	512.726	-87.3375	0.819199	0.712362	myristoyl-acyl carrier protein thioesterase, chloroplast precursor, putative, expressed
LOC_Os01g71240	turquoise	0.959355	1639.21	1009.61	629.598	380.015	0.959355	0.744466	calcium-transporting ATPase, plasma membrane-type, putative, expressed
LOC_Os06g48170	turquoise	0.637912	364.019	129.829	234.19	-104.361	0.637912	0.442383	glycosyl hydrolases family 16, putative, expressed
LOC_Os05g13520	turquoise	0.934209	1737.32	840.168	897.156	-56.9884	0.934209	0.672989	white-brown complex homolog protein 12, putative, expressed
LOC_Os11g43830	turquoise	0.613832	268.665	203.923	64.7419	139.181	0.613832	0.463325	pectinesterase, putative, expressed
LOC_Os01g06080	turquoise	0.744901	478.369	216.715	261.654	-44.9386	0.744901	0.406057	expressed protein
LOC_Os01g71280	turquoise	0.944966	1821.33	910.646	910.679	-0.0337773	0.944966	0.777564	glycerol-3-phosphate dehydrogenase, putative, expressed
LOC_Os04g51130	turquoise	0.775062	500.625	351.629	148.996	202.633	0.775062	0.708708	expressed protein
LOC_Os01g71270	turquoise	0.283079	123.112	34.4297	88.6822	-54.2525	0.283079	0.193937	eukaryotic peptide chain release factor subunit 1-1, putative, expressed
LOC_Os06g12910	turquoise	0.669477	147.002	115.04	31.9618	83.0784	0.669477	0.499331	XPA-binding protein 2, putative, expressed
LOC_Os02g52990	turquoise	0.657336	345.132	133.524	211.609	-78.0846	0.657336	0.74389	OsSAUR12 - Auxin-responsive SAUR gene family member, expressed
LOC_Os12g01480	turquoise	0.782067	843.289	342.914	500.375	-157.46	0.782067	0.851542	phosphatidate cytidylyltransferase, putative, expressed
LOC_Os12g38920	turquoise	0.587799	361.296	125.123	236.173	-111.05	0.587799	0.158164	heparanase-like protein precursor, putative, expressed
LOC_Os06g09610	turquoise	0.889364	1265.58	610.26	655.324	-45.0639	0.889364	0.709607	peroxiredoxin, putative, expressed
LOC_Os11g43890	turquoise	0.763962	416.777	282.027	134.751	147.276	0.763962	0.63694	WD domain, G-beta repeat domain containing protein, expressed
LOC_Os11g43895	turquoise	0.633778	165.204	101.841	63.3626	38.4785	0.633778	0.419169	expressed protein
LOC_Os09g32500	turquoise	0.403961	263.888	100.788	163.099	-62.3111	0.403961	0.00412262	60S ribosomal protein L32, putative, expressed
LOC_Os04g51100	turquoise	0.480738	97.3224	36.8238	60.4986	-23.6748	0.480738	0.211465	COBW domain containing protein, putative, expressed
LOC_Os04g33880	turquoise	0.724798	418.473	180.85	237.622	-56.7718	0.724798	0.389082	HVA22, putative, expressed
LOC_Os06g39660	turquoise	0.197499	36.1576	6.83325	29.3243	-22.491	0.197499	0.0161907	FAD binding domain containing protein, expressed
LOC_Os12g06980	turquoise	0.916677	1148.34	736.375	411.963	324.413	0.916677	0.645094	SAP domain containing protein, expressed
LOC_Os09g32526	turquoise	0.82316	1047.55	502.028	545.524	-43.4957	0.82316	0.570713	peptidyl-prolyl cis-trans isomerase, FKBP-type, putative, expressed
LOC_Os02g45240	turquoise	0.691768	233.576	128.734	104.842	23.8914	0.691768	0.419637	zinc finger family protein, putative, expressed
LOC_Os05g50840	turquoise	0.942925	1693.1	892.452	800.652	91.7998	0.942925	0.729287	mitochondrial carrier protein, putative, expressed
LOC_Os05g50830	turquoise	0.831364	877.692	686.313	191.379	494.934	0.831364	0.691595	protein kinase family protein, putative, expressed
LOC_Os02g52920	turquoise	0.87628	1296.86	593.799	703.06	-109.261	0.87628	0.771939	emp24/gp25L/p24 family protein, putative, expressed
LOC_Os06g39640	turquoise	0.93875	1795.4	845.58	949.82	-104.239	0.93875	0.689814	PINHEAD, putative, expressed
LOC_Os12g01420	turquoise	0.744271	555.142	217.483	337.66	-120.177	0.744271	0.715993	ammonium transporter protein, putative, expressed
LOC_Os01g40950	turquoise	0.375016	62.9156	18.6407	44.2749	-25.6341	0.375016	0.526061	expressed protein
LOC_Os05g27240	turquoise	0.726989	495.3	342.431	152.869	189.562	0.726989	0.646063	expressed protein
LOC_Os10g04370	turquoise	0.944554	1757.69	947.269	810.426	136.843	0.944554	0.776891	OsFBX357 - F-box domain containing protein, expressed
LOC_Os09g32590	turquoise	0.542775	110.461	73.4019	37.0595	36.3424	0.542775	0.377238	expressed protein
LOC_Os03g53550	turquoise	0.896289	1190.79	897.316	293.477	603.839	0.896289	0.693067	retrotransposon protein, putative, unclassified, expressed
LOC_Os01g01870	turquoise	0.568798	140.821	58.667	82.1541	-23.4871	0.568798	0.373374	helix-loop-helix DNA-binding domain containing protein, expressed
LOC_Os03g53530	turquoise	0.670233	365.571	176.178	189.393	-13.2151	0.670233	0.620504	WD domain, G-beta repeat domain containing protein, expressed
LOC_Os07g32110	turquoise	0.937692	1329	878.56	450.436	428.124	0.937692	0.771587	transposon protein, putative, unclassified, expressed
LOC_Os04g21570	turquoise	0.610763	218.144	151.455	66.6889	84.7664	0.610763	0.532885	fasciclin-like arabinogalactan precursor protein, putative, expressed
LOC_Os03g53520	turquoise	0.62248	380.824	143.538	237.286	-93.748	0.62248	0.193034	expressed protein
LOC_Os05g50850	turquoise	0.258792	25.8231	6.29256	19.5306	-13.238	0.258792	0.175375	expressed protein
LOC_Os02g45200	turquoise	0.676189	273.582	132.856	140.726	-7.86931	0.676189	0.528706	dof zinc finger domain containing protein, putative, expressed
LOC_Os04g49270	turquoise	0.570916	139.437	44.9704	94.467	-49.4966	0.570916	0.502766	tRNA-splicing endonuclease positive effector-related, putative, expressed
LOC_Os06g39600	turquoise	0.259343	38.53	9.50764	29.0224	-19.5147	0.259343	0.353713	protein phosphatase 2C, putative, expressed
LOC_Os05g13630	turquoise	0.836171	827.917	430.443	397.474	32.9692	0.836171	0.630746	RNA recognition motif containing protein, putative, expressed
LOC_Os06g48240	turquoise	0.590315	142.128	60.962	81.1659	-20.2039	0.590315	0.458231	AAA ATPase, putative, expressed
LOC_Os01g06130	turquoise	0.454036	208.371	82.9669	125.404	-42.4373	0.454036	0.0604922	expressed protein
LOC_Os06g48230	turquoise	0.670922	285.472	154.042	131.43	22.612	0.670922	0.537803	DNA-directed RNA polymerases I, II, and III subunit RPABC3, putative, expressed
LOC_Os11g43740	turquoise	0.982604	1785.07	1179.83	605.235	574.595	0.982604	0.768917	OsMADS68 - MADS-box family gene with MIKC* type-box, expressed
LOC_Os11g06050	turquoise	0.955478	1297.31	947.714	349.6	598.114	0.955478	0.665035	expressed protein
LOC_Os01g71114	turquoise	0.72064	582.234	191.85	390.384	-198.534	0.72064	0.437879	disease resistance protein RGA4, putative, expressed
LOC_Os06g48270	turquoise	0.715232	262.197	158.341	103.856	54.4852	0.715232	0.581353	expressed protein
LOC_Os01g57030	turquoise	0.963908	1784.46	1123.86	660.6	463.263	0.963908	0.79273	expressed protein
LOC_Os04g55520	turquoise	0.493034	75.839	28.6263	47.2127	-18.5863	0.493034	0.23512	AP2 domain containing protein, expressed
LOC_Os11g43700	turquoise	0.742895	363.105	260.762	102.343	158.419	0.742895	0.535252	RGH1A, putative, expressed
LOC_Os07g24240	turquoise	0.525878	67.6168	35.6728	31.944	3.72872	0.525878	0.502849	retrotransposon protein, putative, Ty3-gypsy subclass, expressed
LOC_Os08g33140	turquoise	0.745458	498.578	264.456	234.122	30.3341	0.745458	0.63179	F-box domain containing protein, expressed
LOC_Os01g65290	turquoise	0.562085	133.397	46.0783	87.3189	-41.2406	0.562085	0.270969	retrotransposon protein, putative, unclassified, expressed
LOC_Os04g10420	turquoise	0.442682	127.051	31.2312	95.8202	-64.589	0.442682	0.328514	CW7, putative, expressed
LOC_Os04g33980	turquoise	0.630061	179.185	83.2811	95.9039	-12.6228	0.630061	0.537302	transposon protein, putative, Mutator sub-class, expressed
LOC_Os04g10460	turquoise	0.460047	113.869	35.7074	78.1618	-42.4544	0.460047	0.0139748	amidase, putative, expressed
LOC_Os06g48210	turquoise	0.613656	429.942	150.447	279.495	-129.048	0.613656	0.271773	DEAD-box ATP-dependent RNA helicase, putative, expressed
LOC_Os09g36990	turquoise	0.785881	618.616	281.635	336.981	-55.3463	0.785881	0.565643	expressed protein
LOC_Os04g33970	turquoise	0.638996	141.867	98.0037	43.8635	54.1402	0.638996	0.433088	2-Cys peroxiredoxin BAS1, chloroplast precursor, putative, expressed
LOC_Os05g50720	turquoise	0.840012	765.72	442.497	323.222	119.275	0.840012	0.649744	harpin-induced protein 1 domain containing protein, expressed
LOC_Os02g45130	turquoise	0.960282	1439.75	1032.84	406.902	625.943	0.960282	0.77974	protein kinase, putative, expressed
LOC_Os06g39760	turquoise	0.979635	1791.36	1204.67	586.699	617.967	0.979635	0.794571	WD domain, G-beta repeat domain containing protein, expressed
LOC_Os05g27320	turquoise	0.750696	309.232	222.068	87.1636	134.905	0.750696	0.33171	VHS and GAT domain containing protein, expressed
LOC_Os02g45150	turquoise	0.467557	146.16	40.3762	105.784	-65.4076	0.467557	0.538939	expressed protein
LOC_Os12g01550	turquoise	0.530765	85.1285	35.5056	49.6229	-14.1173	0.530765	0.515648	DUF260 domain containing protein, putative, expressed
LOC_Os01g01970	turquoise	0.819048	932.321	393.691	538.63	-144.94	0.819048	0.711036	expressed protein
LOC_Os12g01540	turquoise	0.527416	91.4034	33.4722	57.9312	-24.459	0.527416	0.294181	expressed protein
LOC_Os02g45180	turquoise	0.765071	685.251	279.169	406.082	-126.913	0.765071	0.632079	ORM1, putative, expressed
LOC_Os09g32670	turquoise	0.555214	170.338	65.7429	104.595	-38.8517	0.555214	0.0265095	UDP-glucuronate 4-epimerase, putative, expressed
LOC_Os02g06080	turquoise	0.67718	349.346	163.734	185.611	-21.8771	0.67718	0.596005	expressed protein
LOC_Os04g51040	turquoise	0.323671	25.1429	7.11016	18.0327	-10.9226	0.323671	0.558125	OsWAK50 - OsWAK receptor-like protein kinase, expressed
LOC_Os03g53650	turquoise	0.839716	1085.56	480.999	604.559	-123.56	0.839716	0.798239	cysteine synthase, putative, expressed
LOC_Os04g55510	turquoise	0.832993	749.36	596.111	153.248	442.863	0.832993	0.679534	zinc finger, C3HC4 type domain containing protein, expressed
LOC_Os04g49194	turquoise	0.400433	78.8131	21.4649	57.3483	-35.8834	0.400433	0.525864	naringenin,2-oxoglutarate 3-dioxygenase, putative, expressed
LOC_Os06g39712	turquoise	0.725397	350.092	192.736	157.356	35.3801	0.725397	0.556508	OsClp10 - Putative Clp protease homologue, expressed
LOC_Os04g49170	turquoise	0.410688	97.8735	29.6244	68.2491	-38.6247	0.410688	0.291497	zinc finger, C3HC4 type domain containing protein, expressed
LOC_Os01g01990	turquoise	0.896488	1085.55	854.38	231.168	623.211	0.896488	0.682105	expressed protein
LOC_Os03g42880	turquoise	0.646132	176.842	103.413	73.4293	29.9832	0.646132	0.416666	nucleotide-binding protein-like, putative, expressed
LOC_Os12g22030	turquoise	0.326866	109.298	25.6272	83.6712	-58.044	0.326866	0.465358	serine hydroxymethyltransferase, mitochondrial precursor, putative, expressed
LOC_Os06g39740	turquoise	0.644035	193.33	109.148	84.1814	24.9671	0.644035	0.302419	ATP synthase subunit beta, putative, expressed
LOC_Os05g50730	turquoise	0.571254	86.9932	41.8095	45.1837	-3.37423	0.571254	0.512379	expressed protein
LOC_Os02g45110	turquoise	0.6793	420.98	176.832	244.148	-67.316	0.6793	0.747599	MT-A70 domain containing protein, expressed
LOC_Os01g71010	turquoise	0.456452	219.251	62.7672	156.484	-93.7165	0.456452	0.04876	lipase precursor, putative, expressed
LOC_Os04g21710	turquoise	0.950405	1415.66	1071.19	344.466	726.722	0.950405	0.767012	expressed protein
LOC_Os03g09160	turquoise	0.777273	699.277	505.478	193.798	311.68	0.777273	0.5849	hydroxyproline-rich glycoprotein family protein, putative, expressed
LOC_Os11g06180	turquoise	0.882758	766.383	581.657	184.727	396.93	0.882758	0.627122	nodulation-signaling pathway 2 protein, putative, expressed
LOC_Os06g12790	turquoise	0.876978	1700.31	670.803	1029.51	-358.702	0.876978	0.90072	ras-related protein, putative, expressed
LOC_Os01g57380	turquoise	0.351315	40.5491	12.4279	28.1212	-15.6933	0.351315	0.194153	hypothetical protein
LOC_Os09g36810	turquoise	0.979369	1812.13	1144.77	667.363	477.408	0.979369	0.798261	beta-galactosidase precursor, putative, expressed
LOC_Os04g55200	turquoise	0.980856	1967.5	1184.26	783.242	401.015	0.980856	0.756773	coatomer subunit epsilon, putative, expressed
LOC_Os04g55210	turquoise	0.820832	752.389	360.966	391.423	-30.4573	0.820832	0.585577	chloride channel protein, putative, expressed
LOC_Os11g06140	turquoise	0.83876	905.554	488.185	417.369	70.8163	0.83876	0.447372	serine/threonine-protein kinase WNK4, putative, expressed
LOC_Os03g09190	turquoise	0.840143	908.228	709.936	198.292	511.644	0.840143	0.624404	OsSCP11 - Putative Serine Carboxypeptidase homologue, expressed
LOC_Os07g32406	turquoise	0.769209	462.253	244.37	217.883	26.4876	0.769209	0.40611	expressed protein
LOC_Os11g35220	turquoise	0.597744	153.737	79.7579	73.9788	5.77908	0.597744	0.526099	OsWAK117 - OsWAK receptor-like cytoplasmic kinase OsWAK-RLCK, expressed
LOC_Os06g09840	turquoise	0.796761	616.725	378.94	237.784	141.156	0.796761	0.64749	expressed protein
LOC_Os04g55250	turquoise	0.311368	45.8484	8.80307	37.0454	-28.2423	0.311368	0.148748	expressed protein
LOC_Os02g06210	turquoise	0.804709	530.202	364.892	165.311	199.581	0.804709	0.498362	phytosulfokine receptor precursor, putative, expressed
LOC_Os02g06215	turquoise	0.755921	363.765	247.609	116.156	131.453	0.755921	0.456909	RNA-directed DNA polymerase, putative, expressed
LOC_Os06g09860	turquoise	0.821982	799.507	629.412	170.095	459.317	0.821982	0.653523	expressed protein
LOC_Os04g55270	turquoise	0.682091	421.667	165.309	256.358	-91.0489	0.682091	0.757154	expressed protein
LOC_Os09g29404	turquoise	0.973037	1647.22	1169.93	477.288	692.645	0.973037	0.776947	glycogen operon protein glgX, putative, expressed
LOC_Os01g71040	turquoise	0.847644	775.895	627.303	148.592	478.711	0.847644	0.656485	expressed protein
LOC_Os09g36850	turquoise	0.707855	518.241	213.763	304.478	-90.7149	0.707855	0.772736	expressed protein
LOC_Os04g10500	turquoise	0.69644	428.433	322.33	106.103	216.227	0.69644	0.567814	expressed protein
LOC_Os07g28930	turquoise	0.966534	1480.12	1029.54	450.574	578.967	0.966534	0.719544	expressed protein
LOC_Os09g32330	turquoise	0.733931	520.62	201.145	319.474	-118.329	0.733931	0.503889	expressed protein
LOC_Os12g14280	turquoise	0.363425	16.2866	6.02511	10.2615	-4.23636	0.363425	0.323444	retrotransposon protein, putative, Ty3-gypsy subclass, expressed
LOC_Os07g28920	turquoise	0.934426	1310.55	1022.35	288.199	734.156	0.934426	0.72264	expressed protein
LOC_Os06g09930	turquoise	0.742255	559.378	252.207	307.171	-54.9642	0.742255	0.796406	G protein coupled receptor, putative, expressed
LOC_Os01g40740	turquoise	0.697219	593.805	251.919	341.885	-89.966	0.697219	0.380195	expressed protein
LOC_Os09g29460	turquoise	0.696798	388.564	168.605	219.959	-51.3541	0.696798	0.288529	homeobox associated leucine zipper, putative, expressed
LOC_Os02g45490	turquoise	0.400494	62.4046	21.1602	41.2443	-20.0841	0.400494	0.389617	expressed protein
LOC_Os03g09210	turquoise	0.898948	1424.52	708.835	715.684	-6.84822	0.898948	0.736036	NADH dehydrogenase 1 alpha subcomplex subunit 13, putative, expressed
LOC_Os03g38375	turquoise	0.697197	438.264	335.555	102.709	232.846	0.697197	0.479392	expressed protein
LOC_Os03g42780	turquoise	0.600577	366.175	129.974	236.201	-106.227	0.600577	0.247874	zinc finger protein-related, putative, expressed
LOC_Os03g38390	turquoise	0.806936	766.118	597.887	168.231	429.656	0.806936	0.597054	GDSL-like lipase/acylhydrolase, putative, expressed
LOC_Os02g19060	turquoise	0.936098	1690.31	888.803	801.506	87.2965	0.936098	0.741954	expressed protein
LOC_Os01g38960	turquoise	0.787929	864.573	372.743	491.83	-119.087	0.787929	0.620873	expressed protein
LOC_Os08g41030	turquoise	0.934533	1297.64	834.452	463.185	371.266	0.934533	0.635811	AP2 domain containing protein, expressed
LOC_Os05g50680	turquoise	0.78888	547.361	279.419	267.942	11.4771	0.78888	0.706333	WRKY83, expressed
LOC_Os02g19040	turquoise	0.470925	44.9062	21.0082	23.8979	-2.88971	0.470925	0.459286	GDSL-like lipase/acylhydrolase, putative, expressed
LOC_Os04g49060	turquoise	0.926531	1387.79	785.236	602.55	182.686	0.926531	0.723828	H-BTB3 - Bric-a-Brac, Tramtrack, Broad Complex BTB domain with H family conserved sequence, expressed
LOC_Os03g42799	turquoise	0.302554	231.133	83.1015	148.031	-64.9295	0.302554	0.0626075	expressed protein
LOC_Os03g09220	turquoise	0.793945	747.145	306.438	440.707	-134.269	0.793945	0.627903	stage II sporulation protein E, putative, expressed
LOC_Os04g38010	turquoise	0.502405	69.9194	23.84	46.0794	-22.2394	0.502405	0.35221	transporter family protein, putative, expressed
LOC_Os01g65000	turquoise	0.872816	1225.36	598.686	626.679	-27.9933	0.872816	0.767133	ammonium transporter protein, putative, expressed
LOC_Os01g57240	turquoise	0.769151	743.338	366.763	376.575	-9.81242	0.769151	0.871762	expressed protein
LOC_Os06g48050	turquoise	0.964049	1730.68	1165.45	565.224	600.227	0.964049	0.80098	expressed protein
LOC_Os07g24000	turquoise	0.910437	978.155	691.775	286.38	405.395	0.910437	0.739605	AWPM-19-like membrane family protein, putative, expressed
LOC_Os11g43934	turquoise	0.411759	43.8984	17.3335	26.5649	-9.23135	0.411759	0.334464	pentatricopeptide, putative, expressed
LOC_Os06g12876	turquoise	0.729624	417.829	239.2	178.629	60.5719	0.729624	0.642667	expressed protein
LOC_Os11g35100	turquoise	0.689483	252.694	148.466	104.228	44.2383	0.689483	0.594269	conserved hypothetical protein
LOC_Os11g06240	turquoise	0.863081	1024.98	578.067	446.914	131.153	0.863081	0.516107	ATOZI1, putative, expressed
LOC_Os06g12882	turquoise	0.658716	263.029	131.912	131.118	0.793948	0.658716	0.355511	S phase cyclin A-associated protein in the ER, putative, expressed
LOC_Os08g33350	turquoise	0.872671	1013.62	600.283	413.341	186.942	0.872671	0.672821	expressed protein
LOC_Os11g43980	turquoise	0.810002	1157.31	407.106	750.201	-343.095	0.810002	0.83813	peroxidase precursor, putative, expressed
LOC_Os05g13850	turquoise	0.946956	1486.06	1098.77	387.288	711.48	0.946956	0.73661	TsetseEP precursor, putative, expressed
LOC_Os02g06310	turquoise	0.47965	43.0362	19.176	23.8602	-4.6842	0.47965	0.217662	expressed protein
LOC_Os09g29310	turquoise	0.515057	107.534	38.5744	68.9593	-30.3849	0.515057	0.600189	zinc finger, C3HC4 type domain containing protein, expressed
LOC_Os04g10680	turquoise	0.963608	1479.61	1109.31	370.306	739.002	0.963608	0.761121	zinc finger, C3HC4 type domain containing protein, expressed
LOC_Os11g06234	turquoise	0.707526	298.655	199.055	99.6001	99.4552	0.707526	0.599647	expressed protein
LOC_Os01g65070	turquoise	0.782676	522.167	314.538	207.63	106.908	0.782676	0.598672	hydrolase, alpha/beta fold family domain containing protein, expressed
LOC_Os05g27650	turquoise	0.794465	751.631	390.913	360.719	30.194	0.794465	0.526746	transposon protein, putative, CACTA, En/Spm sub-class, expressed
LOC_Os04g55370	turquoise	0.955118	1520.08	961.199	558.886	402.314	0.955118	0.799169	plant protein of unknown function domain containing protein, expressed
LOC_Os02g06370	turquoise	0.894401	1343.08	733.735	609.344	124.391	0.894401	0.861918	whirly transcription factor domain containing protein, expressed
LOC_Os05g06814	turquoise	0.436672	134.31	61.9573	72.3524	-10.3951	0.436672	0.0666184	expressed protein
LOC_Os02g06390	turquoise	0.745715	581.66	278.26	303.4	-25.1407	0.745715	0.475725	expressed protein
LOC_Os09g36710	turquoise	0.336853	193.11	64.5344	128.576	-64.0414	0.336853	0.0672853	peptidase, T1 family, putative, expressed
LOC_Os12g14140	turquoise	0.831444	709.735	448.745	260.99	187.756	0.831444	0.682091	expressed protein
LOC_Os05g06790	turquoise	0.785607	456.957	261.403	195.554	65.8483	0.785607	0.528177	expressed protein
LOC_Os09g32440	turquoise	0.977529	1646.82	1160.07	486.747	673.327	0.977529	0.73442	endonuclease/exonuclease/phosphatase family domain containing protein, expressed
LOC_Os01g40600	turquoise	0.52774	205.944	57.8405	148.104	-90.263	0.52774	0.673121	coiled-coil domain-containing protein, putative, expressed
LOC_Os01g40610	turquoise	0.707232	471.942	208.35	263.591	-55.2409	0.707232	0.517137	coiled-coil domain-containing protein, putative, expressed
LOC_Os05g27590	turquoise	0.418491	103.17	30.1388	73.0311	-42.8924	0.418491	0.425673	wound-induced protein WI12, putative, expressed
LOC_Os09g36690	turquoise	0.832769	729.648	433.777	295.871	137.906	0.832769	0.483509	expressed protein
LOC_Os01g40620	turquoise	0.661269	389.437	144.971	244.466	-99.4953	0.661269	0.533306	Uncharacterized ACR, COG1565 containing protein, putative, expressed
LOC_Os06g39520	turquoise	0.544331	183.476	58.0544	125.421	-67.3667	0.544331	0.144064	myristoyl-acyl carrier protein thioesterase, chloroplast precursor, putative, expressed
LOC_Os05g06750	turquoise	0.974708	1793.9	1139.16	654.737	484.426	0.974708	0.804685	dihydrolipoyl dehydrogenase, mitochondrial precursor, putative, expressed
LOC_Os10g04074	turquoise	0.862707	907.15	538.315	368.835	169.481	0.862707	0.560564	retrotransposon protein, putative, unclassified, expressed
LOC_Os02g45380	turquoise	0.760701	556.349	412.784	143.565	269.219	0.760701	0.518787	MATE domain containing protein, expressed
LOC_Os07g28800	turquoise	0.759291	309.414	212.728	96.6867	116.041	0.759291	0.393272	heat shock protein DnaJ, putative, expressed
LOC_Os02g45390	turquoise	0.558872	243.599	73.6247	169.974	-96.3495	0.558872	0.65348	RING-H2 finger protein, putative, expressed
LOC_Os01g40650	turquoise	0.546911	302.812	120.254	182.557	-62.3033	0.546911	0.0524355	expressed protein
LOC_Os05g13830	turquoise	0.948232	1520.05	1102.3	417.755	684.542	0.948232	0.749486	TsetseEP precursor, putative, expressed
LOC_Os08g33420	turquoise	0.452288	101.73	42.118	59.6122	-17.4942	0.452288	0.537475	agenet domain containing protein, expressed
LOC_Os02g45344	turquoise	0.830898	840.423	421.224	419.199	2.02428	0.830898	0.54627	O-acyltransferase, putative, expressed
LOC_Os12g14100	turquoise	0.768328	924.079	371.499	552.58	-181.081	0.768328	0.384794	amino acid transporter, putative, expressed
LOC_Os03g53410	turquoise	0.951058	1824.64	1002.34	822.301	180.035	0.951058	0.761662	protein kinase domain containing protein, expressed
LOC_Os01g57230	turquoise	0.933683	1701.64	875.345	826.291	49.0532	0.933683	0.780108	BTBN1 - Bric-a-Brac, Tramtrack, Broad Complex BTB domain with non-phototropic hypocotyl 3 NPH3 and coiled-coil domains, expressed
LOC_Os08g33400	turquoise	0.933653	1504.93	954.224	550.703	403.521	0.933653	0.661015	expressed protein
LOC_Os01g57220	turquoise	0.753714	446.982	253.195	193.787	59.4076	0.753714	0.463141	secretory carrier-associated membrane protein, putative, expressed
LOC_Os02g19180	turquoise	0.577202	178.15	62.3169	115.834	-53.5166	0.577202	0.490338	ZOS2-06 - C2H2 zinc finger protein, expressed
LOC_Os05g23530	turquoise	0.902159	1342.89	676.25	666.636	9.61366	0.902159	0.763341	expressed protein
LOC_Os03g08440	turquoise	0.75678	592.148	312.227	279.921	32.3064	0.75678	0.709665	ribosomal protein S2, putative, expressed
LOC_Os06g38670	turquoise	0.418416	113.87	37.8632	76.0069	-38.1437	0.418416	0.32348	receptor-like protein kinase precursor, putative, expressed
LOC_Os01g28740	turquoise	0.640249	149.102	77.5765	71.5253	6.05119	0.640249	0.483108	transposon protein, putative, unclassified, expressed
LOC_Os01g28730	turquoise	0.855185	871.179	467.721	403.458	64.2633	0.855185	0.641089	protein kinase domain containing protein, expressed
LOC_Os12g42550	turquoise	0.864839	790.354	507.129	283.225	223.903	0.864839	0.55182	methyl-CpG binding domain containing protein, putative, expressed
LOC_Os10g27170	turquoise	0.780393	631.584	502.755	128.829	373.926	0.780393	0.589621	calmodulin-binding protein, putative, expressed
LOC_Os01g48420	turquoise	0.887993	1420.26	702.175	718.083	-15.9087	0.887993	0.868213	peroxiredoxin, putative, expressed
LOC_Os01g48410	turquoise	0.910232	1214.31	948.816	265.496	683.32	0.910232	0.709939	ATROPGEF7/ROPGEF7, putative, expressed
LOC_Os12g38020	turquoise	0.399077	38.5285	16.4669	22.0616	-5.59474	0.399077	0.146338	retrotransposon protein, putative, unclassified, expressed
LOC_Os01g24430	turquoise	0.639921	248.952	99.6652	149.287	-49.6214	0.639921	0.393317	expressed protein
LOC_Os03g38050	turquoise	0.854793	1097.08	491.221	605.856	-114.634	0.854793	0.54485	galactosyltransferase, putative, expressed
LOC_Os01g24420	turquoise	0.487994	83.058	29.4473	53.6107	-24.1634	0.487994	0.386733	expressed protein
LOC_Os07g31390	turquoise	0.598858	136.584	59.2094	77.3751	-18.1657	0.598858	0.377722	beta-expansin precursor, putative, expressed
LOC_Os05g30695	turquoise	0.726468	548.476	256.362	292.114	-35.7521	0.726468	0.383964	expressed protein
LOC_Os03g53890	turquoise	0.652421	462.481	138.299	324.182	-185.884	0.652421	0.819816	N2, N2-dimethylguanosine tRNA methyltransferase, putative, expressed
LOC_Os07g47120	turquoise	0.842556	882.886	693.076	189.81	503.266	0.842556	0.630946	beta-amylase, putative, expressed
LOC_Os05g35160	turquoise	0.956325	1492.89	1032.1	460.79	571.307	0.956325	0.726819	clathrin assembly protein, putative, expressed
LOC_Os09g38010	turquoise	0.573069	98.4461	42.2358	56.2103	-13.9745	0.573069	0.379667	no apical meristem protein, putative, expressed
LOC_Os07g04730	turquoise	0.514749	83.3849	32.0272	51.3577	-19.3305	0.514749	0.328451	expressed protein
LOC_Os06g01340	turquoise	0.941014	1427.76	871.166	556.59	314.576	0.941014	0.709745	CCT/B-box zinc finger protein, putative, expressed
LOC_Os09g38030	turquoise	0.886302	1452.64	691.792	760.845	-69.0521	0.886302	0.837075	UTP--glucose-1-phosphate uridylyltransferase, putative, expressed
LOC_Os09g09790	turquoise	0.903606	1148.7	662.77	485.93	176.84	0.903606	0.521503	Fe-S metabolism associated domain containing protein, expressed
LOC_Os07g47110	turquoise	0.838327	742.269	482.447	259.822	222.626	0.838327	0.708608	OsFBT11 - F-box and tubby domain containing protein, expressed
LOC_Os07g47100	turquoise	0.649036	473.431	187.49	285.941	-98.4509	0.649036	0.252096	transporter, monovalent cation:proton antiporter-2 family, putative, expressed
LOC_Os09g38080	turquoise	0.747627	679.842	286.063	393.779	-107.716	0.747627	0.776956	retrotransposon protein, putative, unclassified, expressed
LOC_Os12g34040	turquoise	0.597258	96.3418	60.3033	36.0386	24.2647	0.597258	0.445988	retrotransposon protein, putative, unclassified, expressed
LOC_Os08g21210	turquoise	0.506327	78.0196	34.7649	43.2547	-8.48973	0.506327	0.476862	transposon protein, putative, CACTA, En/Spm sub-class, expressed
LOC_Os03g14510	turquoise	0.627237	166.604	86.8593	79.7447	7.11461	0.627237	0.46332	immature colon carcinoma transcript 1 protein precursor, putative, expressed
LOC_Os01g24470	turquoise	0.968886	1464.74	1022.13	442.603	579.529	0.968886	0.659961	PHS1, putative, expressed
LOC_Os10g02760	turquoise	0.772132	600.148	325.929	274.219	51.7102	0.772132	0.295502	hydroxyproline-rich glycoprotein family protein, putative, expressed
LOC_Os01g12700	turquoise	0.485559	36.4333	16.608	19.8253	-3.21733	0.485559	0.28876	MYB family transcription factor, putative
LOC_Os12g34018	turquoise	0.545957	68.5997	35.4233	33.1764	2.24698	0.545957	0.302066	ATP synthase protein YMF19, putative, expressed
LOC_Os06g05970	turquoise	0.760001	530.886	268.923	261.963	6.9599	0.760001	0.667058	DUF581 domain containing protein, expressed
LOC_Os12g03510	turquoise	0.878933	995.021	794.698	200.323	594.375	0.878933	0.624243	PME/invertase inhibitor, putative, expressed
LOC_Os04g29870	turquoise	0.662954	231.578	106.182	125.396	-19.2133	0.662954	0.551329	retrotransposon protein, putative, unclassified, expressed
LOC_Os12g42630	turquoise	0.403483	179.689	43.1931	136.496	-93.3026	0.403483	0.0992833	transposon protein, putative, Mutator sub-class, expressed
LOC_Os03g10334	turquoise	0.858798	977.073	706.028	271.045	434.982	0.858798	0.641999	expressed protein
LOC_Os10g02700	turquoise	0.594633	158.178	80.2119	77.9664	2.24556	0.594633	0.648508	retrotransposon protein, putative, unclassified, expressed
LOC_Os12g42650	turquoise	0.939063	1305.11	973.085	332.023	641.062	0.939063	0.760764	pollen preferential protein, putative, expressed
LOC_Os03g14590	turquoise	0.665196	355.041	133.475	221.566	-88.0908	0.665196	0.310575	calcium-binding EF hand family protein, putative, expressed
LOC_Os11g08400	turquoise	0.915409	1280.3	940.645	339.65	600.995	0.915409	0.729688	expressed protein
LOC_Os01g12760	turquoise	0.626969	180.29	75.601	104.689	-29.0882	0.626969	0.429079	cytochrome P450, putative, expressed
LOC_Os06g44780	turquoise	0.893756	1341.78	668.573	673.211	-4.63818	0.893756	0.744338	expressed protein
LOC_Os02g30070	turquoise	0.534407	100.538	41.9466	58.5918	-16.6452	0.534407	0.409653	expressed protein
LOC_Os07g39950	turquoise	0.257825	48.3092	9.52266	38.7865	-29.2639	0.257825	0.213456	mitotic checkpoint protein, putative, expressed
LOC_Os12g26940	turquoise	0.612102	267.094	102.733	164.361	-61.6287	0.612102	0.216053	CHASE domain containing protein, expressed
LOC_Os02g30219	turquoise	0.899039	954.826	671.716	283.11	388.605	0.899039	0.653774	expressed protein
LOC_Os05g23670	turquoise	0.770169	714.74	326.054	388.686	-62.6325	0.770169	0.547411	transcription factor jumonji, putative, expressed
LOC_Os06g44900	turquoise	0.982551	1885.84	1220.01	665.83	554.184	0.982551	0.785233	leaf senescence related protein, putative, expressed
LOC_Os03g08310	turquoise	0.892219	1542.5	762.414	780.089	-17.6753	0.892219	0.742088	ZIM domain containing protein, putative, expressed
LOC_Os10g34230	turquoise	0.547466	211.603	60.2079	151.395	-91.1872	0.547466	0.55877	cytokinin dehydrogenase precursor, putative, expressed
LOC_Os01g28870	turquoise	0.714475	368.232	243.159	125.073	118.086	0.714475	0.531034	retrotransposon protein, putative, unclassified, expressed
LOC_Os10g34220	turquoise	0.916111	1489.71	770.635	719.074	51.5609	0.916111	0.712003	TKL_IRAK_DUF26-lf.1 - DUF26 kinases have homology to DUF26 containing loci, expressed
LOC_Os12g26900	turquoise	0.580552	187.489	65.734	121.755	-56.0212	0.580552	0.580177	retrotransposon protein, putative, unclassified, expressed
LOC_Os06g38594	turquoise	0.872431	847	556.792	290.209	266.583	0.872431	0.660843	expressed protein
LOC_Os06g22120	turquoise	0.678025	267.065	143.174	123.891	19.2833	0.678025	0.445826	hypothetical protein
LOC_Os06g22110	turquoise	0.968394	1604.51	1097.23	507.281	589.951	0.968394	0.793144	retrotransposon protein, putative, unclassified, expressed
LOC_Os07g39930	turquoise	0.977211	1593	1064.8	528.191	536.614	0.977211	0.655193	expressed protein
LOC_Os01g48320	turquoise	0.561398	177.783	79.2894	98.4937	-19.2043	0.561398	0.351022	transcription factor like protein, putative, expressed
LOC_Os12g42660	turquoise	0.978152	1682.41	1178.39	504.025	674.364	0.978152	0.743346	AGC_AGC_other_GWLd.1 - ACG kinases include homologs to PKA, PKG and PKC, expressed
LOC_Os01g48310	turquoise	0.902109	1023.94	688.934	335.002	353.932	0.902109	0.768455	expressed protein
LOC_Os06g44930	turquoise	0.748207	481.675	228.787	252.888	-24.1008	0.748207	0.498037	expressed protein
LOC_Os05g35230	turquoise	0.557686	237.116	79.9241	157.192	-77.2678	0.557686	0.0041836	expressed protein
LOC_Os09g38110	turquoise	0.469682	87.3814	33.2894	54.092	-20.8027	0.469682	0.485165	RING-H2 finger protein, putative, expressed
LOC_Os06g01260	turquoise	0.684834	260.08	153.678	106.402	47.2762	0.684834	0.506548	glutathione gamma-glutamylcysteinyltransferase 1, putative, expressed
LOC_Os09g38100	turquoise	0.95553	1494.61	975.754	518.853	456.901	0.95553	0.738591	phosphate carrier protein, mitochondrial precursor, putative, expressed
LOC_Os04g21340	turquoise	0.871589	1045.05	822.154	222.896	599.258	0.871589	0.693544	expressed protein
LOC_Os05g35240	turquoise	0.235527	71.59	12.1005	59.4895	-47.3891	0.235527	0.130891	expressed protein
LOC_Os07g47290	turquoise	0.864316	1570.3	630.286	940.018	-309.731	0.864316	0.851328	xylose isomerase, putative, expressed
LOC_Os09g09820	turquoise	0.605153	135.184	77.978	57.2059	20.772	0.605153	0.39648	retrotransposon protein, putative, unclassified, expressed
LOC_Os03g53790	turquoise	0.574016	445.964	161.978	283.986	-122.009	0.574016	0.213791	periplasmic beta-glucosidase precursor, putative, expressed
LOC_Os03g14710	turquoise	0.634311	236.678	113.621	123.057	-9.43553	0.634311	0.561954	protein kinase, putative, expressed
LOC_Os06g38510	turquoise	0.956234	1595.08	1140.47	454.608	685.866	0.956234	0.776972	pectate lyase precursor, putative, expressed
LOC_Os09g09800	turquoise	0.60372	165.754	88.8239	76.9302	11.8937	0.60372	0.622215	retrotransposon protein, putative, unclassified, expressed
LOC_Os06g38520	turquoise	0.83927	732.366	452.904	279.462	173.442	0.83927	0.615878	pectate lyase family protein, expressed
LOC_Os07g47250	turquoise	0.751748	462.458	254.303	208.155	46.1477	0.751748	0.670952	lipase precursor, putative, expressed
LOC_Os03g14654	turquoise	0.252756	25.4284	6.12859	19.2998	-13.1712	0.252756	0.0078051	LTPL108 - Protease inhibitor/seed storage/LTP family protein precursor, expressed
LOC_Os09g02700	turquoise	0.270639	100.886	31.0344	69.8518	-38.8173	0.270639	0.151579	polyadenylate-binding protein, putative, expressed
LOC_Os01g72760	turquoise	0.715323	273.014	151.368	121.646	29.7215	0.715323	0.514137	cytochrome P450, putative, expressed
LOC_Os11g08314	turquoise	0.954167	1524.03	1036.88	487.153	549.728	0.954167	0.753832	methyltransferase, putative, expressed
LOC_Os04g43410	turquoise	0.79306	908.997	373.672	535.325	-161.653	0.79306	0.356263	Os4bglu18 - monolignol beta-glucoside homologue, expressed
LOC_Os03g14610	turquoise	0.8665	763.016	658.14	104.876	553.264	0.8665	0.631953	HVA22, putative, expressed
LOC_Os01g72790	turquoise	0.851454	953.738	476.662	477.076	-0.413588	0.851454	0.447455	cyclin-dependent kinase, putative, expressed
LOC_Os05g27950	turquoise	0.897595	1235.49	678.067	557.418	120.65	0.897595	0.774546	DUF538 domain containing protein, putative, expressed
LOC_Os11g08340	turquoise	0.335736	78.1157	18.8196	59.296	-40.4764	0.335736	0.0842874	OsGH3.12 - Probable indole-3-acetic acid-amido synthetase, expressed
LOC_Os03g53730	turquoise	0.852733	1090.71	659.625	431.085	228.54	0.852733	0.719211	flavoprotein wrbA, putative, expressed
LOC_Os02g14760	turquoise	0.932916	1371.01	831.687	539.32	292.367	0.932916	0.619326	CID11, putative, expressed
LOC_Os03g08290	turquoise	0.513789	95.5182	35.5615	59.9567	-24.3952	0.513789	0.579698	expressed protein
LOC_Os01g24340	turquoise	0.583108	135.781	59.395	76.3859	-16.991	0.583108	0.344458	expressed protein
LOC_Os07g35680	turquoise	0.580111	214.723	74.7888	139.935	-65.1459	0.580111	0.193463	TKL_IRAK_DUF26-lc22 - DUF26 kinases have homology to DUF26 containing loci, expressed
LOC_Os02g14770	turquoise	0.823196	735.554	406.375	329.178	77.1974	0.823196	0.42685	phosphoenolpyruvate carboxylase, putative, expressed
LOC_Os06g05890	turquoise	0.828827	863.931	444.453	419.479	24.9739	0.828827	0.55237	B-box zinc finger family protein, putative, expressed
LOC_Os11g08370	turquoise	0.628404	149.953	94.7665	55.1867	39.5797	0.628404	0.266147	transporter, major facilitator family, putative, expressed
LOC_Os06g05860	turquoise	0.942663	1427.68	868.474	559.207	309.267	0.942663	0.706924	6-phosphofructokinase, putative, expressed
LOC_Os03g10220	turquoise	0.885083	1136.77	654.468	482.305	172.162	0.885083	0.867785	methyladenine glycosylase, putative, expressed
LOC_Os12g42770	turquoise	0.778124	371.123	257.35	113.773	143.577	0.778124	0.489181	expressed protein
LOC_Os09g02750	turquoise	0.56624	84.3255	55.8494	28.4762	27.3732	0.56624	0.527439	expressed protein
LOC_Os10g02840	turquoise	0.443678	134.676	42.1335	92.5426	-50.4091	0.443678	0.185282	O-methyltransferase, putative, expressed
LOC_Os03g14690	turquoise	0.943989	1410.15	907.978	502.176	405.803	0.943989	0.754831	vacuolar ATP synthase 98 kDa subunit, putative, expressed
LOC_Os12g10190	turquoise	0.951755	1447.88	1092.29	355.594	736.691	0.951755	0.754828	transposon protein, putative, unclassified, expressed
LOC_Os05g23620	turquoise	0.909908	1441.64	789.642	652	137.642	0.909908	0.683591	cytochrome c1-1, heme protein, mitochondrial precursor, putative, expressed
LOC_Os01g12880	turquoise	0.456305	115.094	44.9771	70.1173	-25.1403	0.456305	0.470538	VHS and GAT domain containing protein, expressed
LOC_Os12g03430	turquoise	0.741399	467.973	253.832	214.141	39.6914	0.741399	0.835683	Mpv17 / PMP22 family domain containing protein, expressed
LOC_Os02g30190	turquoise	0.259142	16.3439	3.7884	12.5555	-8.76708	0.259142	0.0256097	expressed protein
LOC_Os07g35610	turquoise	0.64876	328.368	136.955	191.413	-54.4572	0.64876	0.170519	kelch repeat-containing protein, putative, expressed
LOC_Os03g08630	turquoise	0.562624	223.785	77.0565	146.729	-69.6724	0.562624	0.499094	NAD-dependent epimerase/dehydratase, putative, expressed
LOC_Os05g30430	turquoise	0.585043	197.806	65.9067	131.899	-65.9926	0.585043	0.479615	expressed protein
LOC_Os05g23320	turquoise	0.905003	1464.01	704.421	759.59	-55.1694	0.905003	0.577072	expressed protein
LOC_Os03g61100	turquoise	0.51241	66.29	24.9214	41.3686	-16.4473	0.51241	0.532991	GDP-mannose transporter, putative, expressed
LOC_Os03g61130	turquoise	0.798799	613.759	352.443	261.316	91.1263	0.798799	0.340054	phosphoesterase family protein, putative, expressed
LOC_Os03g08610	turquoise	0.966414	1389.79	1015.13	374.667	640.458	0.966414	0.639057	leucine-rich repeat family protein, putative, expressed
LOC_Os03g61120	turquoise	0.717119	779.566	320.174	459.393	-139.219	0.717119	0.300413	anthranilate synthase component I-1, chloroplast precursor, putative, expressed
LOC_Os10g27350	turquoise	0.754767	503.163	274.832	228.33	46.502	0.754767	0.659004	DUF584 domain containing protein, putative, expressed
LOC_Os02g47320	turquoise	0.86069	1269.67	589.757	679.916	-90.159	0.86069	0.708427	vacuolar ATPase G subunit, putative, expressed
LOC_Os10g27370	turquoise	0.91743	1329.73	924.97	404.765	520.205	0.91743	0.79863	transposon protein, putative, Pong sub-class, expressed
LOC_Os07g04520	turquoise	0.852954	1023.24	698.995	324.248	374.747	0.852954	0.624349	protein kinase, putative, expressed
LOC_Os10g27330	turquoise	0.849732	687.161	458.091	229.069	229.022	0.849732	0.637687	glycerol-3-phosphate acyltransferase, putative, expressed
LOC_Os06g49080	turquoise	0.601102	249.162	98.0362	151.125	-53.0892	0.601102	0.669303	zinc finger C-x8-C-x5-C-x3-H type family protein, expressed
LOC_Os05g30470	turquoise	0.655435	173.875	83.8127	90.0624	-6.24968	0.655435	0.552554	collagen alpha-1, putative, expressed
LOC_Os04g43350	turquoise	0.54951	199.198	75.6665	123.531	-47.865	0.54951	0.679378	expressed protein
LOC_Os09g38210	turquoise	0.130165	59.4899	10.5067	48.9832	-38.4765	0.130165	0.274837	auxin efflux carrier component, putative, expressed
LOC_Os03g04120	turquoise	0.449286	82.3302	32.201	50.1291	-17.9281	0.449286	0.276656	AMP-binding enzyme, putative, expressed
LOC_Os01g72800	turquoise	0.875866	1380.78	594.174	786.602	-192.428	0.875866	0.872656	signal recognition particle receptor, putative, expressed
LOC_Os04g06030	turquoise	0.751992	394.339	212.176	182.163	30.0135	0.751992	0.71803	transposon protein, putative, CACTA, En/Spm sub-class, expressed
LOC_Os01g28580	turquoise	0.413083	39.7508	13.7969	25.9539	-12.157	0.413083	0.337317	expressed protein
LOC_Os03g04100	turquoise	0.927263	1112.13	748.323	363.806	384.516	0.927263	0.604308	expressed protein
LOC_Os06g49140	turquoise	0.875043	1024.19	605.144	419.047	186.097	0.875043	0.717709	ribosomal RNA large subunit methyltransferase J, putative, expressed
LOC_Os01g63050	turquoise	0.676939	255.272	167.006	88.2659	78.7397	0.676939	0.659432	expressed protein
LOC_Os03g04140	turquoise	0.54827	377.205	137.949	239.256	-101.308	0.54827	0.153277	serine acetyltransferase protein, putative, expressed
LOC_Os06g49120	turquoise	0.516271	199.475	76.2427	123.233	-46.9899	0.516271	0.497297	Complex I intermediate-associated protein 30 domain containing protein, putative, expressed
LOC_Os09g09540	turquoise	0.571701	121.466	59.0345	62.4311	-3.3966	0.571701	0.351634	transposon protein, putative, unclassified, expressed
LOC_Os02g26890	turquoise	0.633869	165.976	82.06	83.9156	-1.85558	0.633869	0.278138	PPR repeat containing protein, expressed
LOC_Os07g04540	turquoise	0.374844	247.684	77.404	170.28	-92.8761	0.374844	0.0993499	expressed protein
LOC_Os01g63020	turquoise	0.589736	421.93	191.413	230.517	-39.1035	0.589736	0.226484	expressed protein
LOC_Os03g40650	turquoise	0.750541	467.17	216.361	250.81	-34.4489	0.750541	0.535919	bromodomain associated family protein, expressed
LOC_Os12g42810	turquoise	0.296886	203.39	58.7879	144.602	-85.8138	0.296886	0.194807	mov34/MPN/PAD-1 family protein, expressed
LOC_Os10g02930	turquoise	0.552156	91.6692	55.6198	36.0495	19.5703	0.552156	0.40808	helicase SEN1, putative, expressed
LOC_Os03g10550	turquoise	0.897804	1181.79	784.495	397.293	387.201	0.897804	0.828994	expressed protein
LOC_Os12g42820	turquoise	0.773608	485.252	238.15	247.102	-8.95112	0.773608	0.570818	SWITCH1 splice variant S, putative, expressed
LOC_Os06g09960	turquoise	0.665456	245.73	157.291	88.4387	68.8524	0.665456	0.468753	expressed protein
LOC_Os05g27890	turquoise	0.961468	1675.84	1026.25	649.587	376.664	0.961468	0.801589	expressed protein
LOC_Os04g50110	turquoise	0.551787	168.033	63.5929	104.44	-40.8474	0.551787	0.468913	RNA recognition motif containing protein, putative, expressed
LOC_Os09g06870	turquoise	0.600269	134.451	76.4184	58.0329	18.3855	0.600269	0.48229	retrotransposon protein, putative, unclassified
LOC_Os10g02920	turquoise	0.666238	341.608	158.907	182.701	-23.7945	0.666238	0.643312	cytochrome b561, putative, expressed
LOC_Os06g34040	turquoise	0.669424	722.858	256.132	466.726	-210.594	0.669424	0.390231	DJ-1 family protein, putative, expressed
LOC_Os01g12540	turquoise	0.651386	326.857	150.739	176.118	-25.3793	0.651386	0.618523	GTPase of unknown function domain containing protein, putative, expressed
LOC_Os12g42850	turquoise	0.527531	261.834	92.4228	169.412	-76.9889	0.527531	0.0252795	amino acid permease, putative, expressed
LOC_Os02g30280	turquoise	0.552968	148.442	58.8208	89.6213	-30.8005	0.552968	0.423634	expressed protein
LOC_Os03g08600	turquoise	0.488497	135.389	46.2324	89.1565	-42.9241	0.488497	0.489587	glycosyl transferase, putative, expressed
LOC_Os03g40600	turquoise	0.465698	61.7833	21.6299	40.1534	-18.5235	0.465698	0.253529	cytochrome P450 78A11, putative, expressed
LOC_Os06g05730	turquoise	0.838265	831.61	671.604	160.007	511.597	0.838265	0.661558	expressed protein
LOC_Os03g10570	turquoise	0.60079	133.144	77.4451	55.6992	21.7459	0.60079	0.551587	HORMA domain containing protein, putative, expressed
LOC_Os01g12580	turquoise	0.458641	137.336	43.3055	94.0306	-50.7251	0.458641	0.139793	late embryogenesis abundant protein, putative, expressed
LOC_Os10g02940	turquoise	0.411481	41.1868	16.9033	24.2835	-7.38013	0.411481	0.51268	expressed protein
LOC_Os04g50176	turquoise	0.928731	1663.75	953.583	710.167	243.416	0.928731	0.775465	expressed protein
LOC_Os08g29980	turquoise	0.870764	1028.14	590.877	437.263	153.614	0.870764	0.670797	retrotransposon protein, putative, unclassified, expressed
LOC_Os12g10340	turquoise	0.816956	647.35	408.639	238.711	169.928	0.816956	0.735742	NBS-LRR type resistance protein, putative, expressed
LOC_Os05g23470	turquoise	0.395897	129.832	44.9221	84.91	-39.9879	0.395897	0.127466	AN1-like zinc finger domain containing protein, expressed
LOC_Os06g29080	turquoise	0.874519	1001.76	780.269	221.49	558.778	0.874519	0.628257	expressed protein
LOC_Os01g28600	turquoise	0.673278	384.616	152.33	232.286	-79.9566	0.673278	0.564424	exo70 exocyst complex subunit family protein, putative, expressed
LOC_Os02g30470	turquoise	0.846998	720.536	481.712	238.824	242.887	0.846998	0.721172	expressed protein
LOC_Os12g10390	turquoise	0.787779	403.16	273.506	129.654	143.853	0.787779	0.531495	disease resistance protein, putative, expressed
LOC_Os03g08530	turquoise	0.568706	130.045	58.0752	71.9699	-13.8947	0.568706	0.245827	aminotransferase, classes I and II, domain containing protein, expressed
LOC_Os03g08540	turquoise	0.831543	1087.2	452.819	634.376	-181.557	0.831543	0.772748	expressed protein
LOC_Os02g30460	turquoise	0.841781	911.041	481.416	429.625	51.7912	0.841781	0.63791	uncharacterized protein MJ0304, putative, expressed
LOC_Os02g47440	turquoise	0.881813	844.742	632.096	212.646	419.449	0.881813	0.737906	syntaxin, putative, expressed
LOC_Os10g27480	turquoise	0.959429	1512.1	1126.33	385.772	740.553	0.959429	0.773611	expressed protein
LOC_Os03g14900	turquoise	0.853234	1095.68	505.053	590.624	-85.5719	0.853234	0.509615	NB-ARC/LRR disease resistance protein, putative, expressed
LOC_Os04g43210	turquoise	0.7509	894.044	362.064	531.98	-169.916	0.7509	0.371686	transporter family protein, putative, expressed
LOC_Os01g48130	turquoise	0.70762	244.213	165.809	78.4045	87.404	0.70762	0.256527	no apical meristem protein, putative, expressed
LOC_Os07g47490	turquoise	0.471452	170.951	52.0621	118.889	-66.8268	0.471452	0.428555	OsGH3.11 - Probable indole-3-acetic acid-amido synthetase, expressed
LOC_Os01g48170	turquoise	0.623351	163.225	86.8213	76.4039	10.4174	0.623351	0.201039	homeobox domain containing protein, expressed
LOC_Os01g28690	turquoise	0.871299	1510.56	688.13	822.426	-134.296	0.871299	0.816054	nucleoporin autopeptidase domain containing protein, expressed
LOC_Os01g72930	turquoise	0.367997	74.6842	18.0976	56.5866	-38.4891	0.367997	0.424971	pentatricopeptide, putative, expressed
LOC_Os11g18130	turquoise	0.573658	85.6941	44.5704	41.1237	3.44678	0.573658	0.241953	expressed protein
LOC_Os07g31300	turquoise	0.89896	1484.8	765.003	719.793	45.21	0.89896	0.715477	ATP synthase delta chain, mitochondrial precursor, putative, expressed
LOC_Os07g47460	turquoise	0.424933	54.7	19.9375	34.7625	-14.825	0.424933	0.106459	expressed protein
LOC_Os07g31320	turquoise	0.584831	144.211	73.5537	70.6577	2.89603	0.584831	0.410368	expressed protein
LOC_Os04g29920	turquoise	0.640432	184.031	87.4177	96.6136	-9.19588	0.640432	0.343804	reticulon domain containing protein, putative, expressed
LOC_Os01g12660	turquoise	0.97262	1569.37	1125.4	443.976	681.419	0.97262	0.757675	AAA-type ATPase family protein, putative, expressed
LOC_Os06g05620	turquoise	0.24842	59.1525	13.0018	46.1507	-33.1489	0.24842	0.195499	OsFBDUF33 - F-box and DUF domain containing protein, expressed
LOC_Os03g40700	turquoise	0.656538	202.743	111.422	91.3205	20.1015	0.656538	0.711968	presenilin, putative, expressed
LOC_Os09g02540	turquoise	0.451923	41.5786	13.6818	27.8968	-14.215	0.451923	0.193936	expressed protein
LOC_Os03g10469	turquoise	0.966977	1697.77	1098.87	598.899	499.968	0.966977	0.801267	glycosyl hydrolase family 10 protein, putative, expressed
LOC_Os03g61290	turquoise	0.75214	362.124	293.174	68.9501	224.224	0.75214	0.504709	ATCHX, putative, expressed
LOC_Os03g40720	turquoise	0.939663	1657.37	898.938	758.43	140.508	0.939663	0.76441	UDP-glucose 6-dehydrogenase, putative, expressed
LOC_Os01g31890	turquoise	0.659237	156.864	93.0291	63.835	29.1941	0.659237	0.528669	transposon protein, putative, unclassified, expressed
LOC_Os06g05610	turquoise	0.806578	497.104	378.11	118.994	259.116	0.806578	0.552158	OsFBDUF32 - F-box and DUF domain containing protein, expressed
LOC_Os01g12670	turquoise	0.513788	79.9352	37.4422	42.4929	-5.0507	0.513788	0.0953878	expressed protein
LOC_Os02g22690	turquoise	0.75149	345.576	247.755	97.8216	149.933	0.75149	0.521542	retrotransposon, putative, centromere-specific
LOC_Os12g10640	turquoise	0.566465	110.64	44.554	66.0862	-21.5322	0.566465	0.304068	uncharacterized protein ycf45, putative, expressed
LOC_Os08g09270	turquoise	0.654897	370.781	150.081	220.7	-70.6191	0.654897	0.509401	pentatricopeptide, putative, expressed
LOC_Os09g38470	turquoise	0.468134	60.8445	17.9258	42.9187	-24.9928	0.468134	0.449077	expressed protein
LOC_Os02g14280	turquoise	0.402138	25.0091	9.26557	15.7436	-6.47798	0.402138	0.387607	transposon protein, putative, unclassified, expressed
LOC_Os04g43130	turquoise	0.700052	550.801	201.882	348.919	-147.038	0.700052	0.326154	transcriptional corepressor LEUNIG, putative, expressed
LOC_Os03g04320	turquoise	0.521096	93.2742	38.5563	54.7179	-16.1615	0.521096	0.281705	expressed protein
LOC_Os12g38440	turquoise	0.940271	1675.15	847.754	827.394	20.3592	0.940271	0.689864	XH domain containing protein, expressed
LOC_Os02g22680	turquoise	0.574395	171.23	54.9838	116.247	-61.2629	0.574395	0.647333	integral membrane protein DUF6 containing protein, expressed
LOC_Os12g38450	turquoise	0.953437	1609.79	1050.61	559.184	491.426	0.953437	0.856885	exostosin family domain containing protein, expressed
LOC_Os02g08080	turquoise	0.294289	61.992	18.9195	43.0725	-24.153	0.294289	0.0270758	expressed protein
LOC_Os10g02220	turquoise	0.850711	1122.39	512.893	609.5	-96.6076	0.850711	0.762384	peptide transporter PTR2, putative, expressed
LOC_Os06g22654	turquoise	0.284736	126.546	35.1567	91.3892	-56.2325	0.284736	0.0169816	expressed protein
LOC_Os09g02360	turquoise	0.684292	271.241	167.986	103.255	64.7317	0.684292	0.601098	cyclin, putative, expressed
LOC_Os12g38430	turquoise	0.454651	54.5027	29.2471	25.2555	3.99163	0.454651	0.407633	SR repressor protein, putative, expressed
LOC_Os01g12390	turquoise	0.840632	886.772	500.873	385.899	114.975	0.840632	0.749111	inactive receptor kinase At2g26730 precursor, putative, expressed
LOC_Os09g02370	turquoise	0.865964	863.251	614.953	248.298	366.655	0.865964	0.704497	expressed protein
LOC_Os06g22690	turquoise	0.845744	976.371	446.039	530.332	-84.2931	0.845744	0.763396	bundle sheath defective protein 2, putative, expressed
LOC_Os03g14190	turquoise	0.688898	295.552	183.005	112.547	70.4582	0.688898	0.683413	RNA recognition motif containing protein, putative, expressed
LOC_Os11g03920	turquoise	0.897368	1428.24	703.652	724.587	-20.9347	0.897368	0.795436	expressed protein
LOC_Os02g08018	turquoise	0.378453	116.868	31.3539	85.5142	-54.1603	0.378453	0.164365	calcium-transporting ATPase 9, plasma membrane-type, putative, expressed
LOC_Os02g08000	turquoise	0.560529	136.408	47.363	89.0454	-41.6824	0.560529	0.556847	expressed protein
LOC_Os04g45500	turquoise	0.735673	384.596	216.12	168.475	47.6447	0.735673	0.665131	expressed protein
LOC_Os04g37600	turquoise	0.963024	1675.82	1166.14	509.673	656.471	0.963024	0.767134	phosphate carrier protein, mitochondrial precursor, putative, expressed
LOC_Os04g33300	turquoise	0.795388	788.958	327.293	461.665	-134.372	0.795388	0.675955	amino acid kinase, putative, expressed
LOC_Os07g31850	turquoise	0.552579	274.104	91.7805	182.324	-90.5434	0.552579	0.05912	zinc finger, C3HC4 type domain containing protein, expressed
LOC_Os05g23924	turquoise	0.809026	823.905	389.118	434.787	-45.6694	0.809026	0.881646	glycosyl hydrolase family 10 protein, putative, expressed
LOC_Os03g08810	turquoise	0.310686	191.072	75.4644	115.607	-40.1428	0.310686	0.0269073	expressed protein
LOC_Os01g12330	turquoise	0.850752	919.49	686.598	232.892	453.705	0.850752	0.625322	expressed protein
LOC_Os07g31830	turquoise	0.958156	1618.06	1148.29	469.777	678.511	0.958156	0.745115	GTPase activating protein, putative, expressed
LOC_Os12g14910	turquoise	0.664579	195.282	128.215	67.0677	61.1468	0.664579	0.377892	hypothetical protein
LOC_Os04g33330	turquoise	0.812177	645.412	385.932	259.48	126.452	0.812177	0.534381	expressed protein
LOC_Os03g14130	turquoise	0.773898	652.536	314.511	338.025	-23.5146	0.773898	0.812096	POEI1 - Pollen Ole e I allergen and extensin family protein precursor, expressed
LOC_Os05g23950	turquoise	0.837766	946.308	475.523	470.785	4.7387	0.837766	0.62001	TRAF-type zinc finger family protein, expressed
LOC_Os03g14120	turquoise	0.790598	625.973	350.273	275.7	74.5724	0.790598	0.503203	dihydrodipicolinate reductase, putative, expressed
LOC_Os07g35970	turquoise	0.928264	1566.72	829.281	737.438	91.8437	0.928264	0.789102	SMP-30/Gluconolaconase/LRE-like region containing protein, expressed
LOC_Os05g23960	turquoise	0.567458	101.146	48.6978	52.4484	-3.75059	0.567458	0.380598	pentatricopeptide, putative, expressed
LOC_Os04g01850	turquoise	0.389927	26.5758	9.34054	17.2352	-7.8947	0.389927	0.050771	hypothetical protein
LOC_Os01g35980	turquoise	0.864842	1028.71	681.131	347.583	333.548	0.864842	0.83833	expressed protein
LOC_Os11g03980	turquoise	0.865296	823.267	598.347	224.92	373.427	0.865296	0.673622	OsCML2 - Calmodulin-related calcium sensor protein, expressed
LOC_Os12g03100	turquoise	0.430092	134.643	37.9132	96.7297	-58.8165	0.430092	0.636064	exostosin family domain containing protein, expressed
LOC_Os01g12304	turquoise	0.71395	565.553	241.596	323.958	-82.3618	0.71395	0.421341	esterase, putative, expressed
LOC_Os01g63240	turquoise	0.666441	238.302	124.872	113.43	11.4425	0.666441	0.401335	reticulon domain containing protein, putative, expressed
LOC_Os01g63270	turquoise	0.98972	1886.47	1213.99	672.487	541.5	0.98972	0.785623	alpha-glucan phosphorylast isozyme, putative, expressed
LOC_Os06g44320	turquoise	0.466516	36.826	16.3842	20.4419	-4.05769	0.466516	0.336835	expressed protein
LOC_Os02g22760	turquoise	0.944389	1428	955.07	472.934	482.136	0.944389	0.813542	retrotransposon protein, putative, LINE subclass, expressed
LOC_Os06g01780	turquoise	0.931426	1300.87	985.398	315.475	669.922	0.931426	0.722698	ethylene-responsive element-binding protein, putative, expressed
LOC_Os02g22700	turquoise	0.864696	758.045	565.404	192.641	372.762	0.864696	0.634664	retrotransposon, putative, centromere-specific, expressed
LOC_Os01g63290	turquoise	0.670078	335.603	136.192	199.41	-63.2182	0.670078	0.747152	transporter, major facilitator family, putative, expressed
LOC_Os06g44370	turquoise	0.711091	327.645	208.368	119.277	89.0911	0.711091	0.562866	WD domain, G-beta repeat domain containing protein, expressed
LOC_Os03g40880	turquoise	0.390802	77.3519	27.4143	49.9376	-22.5232	0.390802	0.344012	retrotransposon protein, putative, unclassified, expressed
LOC_Os03g04380	turquoise	0.438248	47.6372	15.116	32.5213	-17.4053	0.438248	0.392134	LYR motif containing protein, putative, expressed
LOC_Os02g30624	turquoise	0.476875	84.7097	32.8775	51.8322	-18.9547	0.476875	0.499908	LSM domain containing protein, expressed
LOC_Os02g30610	turquoise	0.947549	1724.9	1035.79	689.108	346.685	0.947549	0.799744	expressed protein
LOC_Os02g30600	turquoise	0.683772	305.144	127.971	177.173	-49.2025	0.683772	0.468517	expressed protein
LOC_Os09g38570	turquoise	0.911833	1339.87	705.678	634.194	71.484	0.911833	0.624808	transcription factor like protein, putative, expressed
LOC_Os03g04480	turquoise	0.75691	415.561	237.83	177.731	60.099	0.75691	0.627992	CorA-like magnesium transporter protein, putative, expressed
LOC_Os06g38980	turquoise	0.768499	853.012	381.76	471.252	-89.4925	0.768499	0.315938	polyadenylate-binding protein, putative, expressed
LOC_Os06g29220	turquoise	0.68657	453.17	160.406	292.764	-132.357	0.68657	0.62637	erythronate-4-phosphate dehydrogenase domain containing protein, expressed
LOC_Os01g63410	turquoise	0.857403	996.645	490.534	506.111	-15.5768	0.857403	0.606625	expressed protein
LOC_Os04g45460	turquoise	0.79666	584.875	344.899	239.976	104.923	0.79666	0.422065	cysteine-rich repeat secretory protein precursor, putative, expressed
LOC_Os03g04410	turquoise	0.963356	1612.31	1070.43	541.876	528.557	0.963356	0.809809	aconitate hydratase protein, putative, expressed
LOC_Os02g30650	turquoise	0.799605	648.077	337.295	310.783	26.512	0.799605	0.454567	heavy metal-associated domain containing protein, expressed
LOC_Os04g45470	turquoise	0.88744	1219.89	608.873	611.014	-2.14053	0.88744	0.629645	vacuolar-processing enzyme precursor, putative, expressed
LOC_Os02g22770	turquoise	0.952666	1721.97	961.02	760.947	200.073	0.952666	0.69463	expressed protein
LOC_Os09g02284	turquoise	0.717935	453.844	252.03	201.815	50.215	0.717935	0.738474	DNA-directed RNA polymerase subunit, putative, expressed
LOC_Os06g22500	turquoise	0.646502	211.872	122.151	89.7215	32.4294	0.646502	0.557851	retrotransposon protein, putative, unclassified, expressed
LOC_Os10g34670	turquoise	0.456065	241.782	53.6642	188.117	-134.453	0.456065	0.757226	prefoldin, putative, expressed
LOC_Os09g02270	turquoise	0.724937	423.443	172.152	251.292	-79.1403	0.724937	0.441568	cyclase family protein, putative, expressed
LOC_Os09g38510	turquoise	0.359239	110.928	17.3048	93.6229	-76.318	0.359239	0.0202836	purine permease, putative, expressed
LOC_Os10g34680	turquoise	0.975674	1640.12	1135.72	504.405	631.315	0.975674	0.773874	vacuolar protein sorting-associated protein 52, putative, expressed
LOC_Os09g38520	turquoise	0.662429	249.128	111.274	137.853	-26.579	0.662429	0.529611	DOMON domain containing protein, expressed
LOC_Os06g29290	turquoise	0.884967	888.807	634.746	254.061	380.685	0.884967	0.696618	pentatricopeptide, putative, expressed
LOC_Os01g31580	turquoise	0.451412	123.2	31.5112	91.6888	-60.1777	0.451412	0.45683	BZIP protein, putative, expressed
LOC_Os04g37750	turquoise	0.763449	378.743	250.595	128.148	122.447	0.763449	0.287998	expressed protein
LOC_Os04g45400	turquoise	0.428042	55.4537	17.4462	38.0075	-20.5612	0.428042	0.484704	retrotransposon protein, putative, Ty3-gypsy subclass, expressed
LOC_Os06g22530	turquoise	0.735423	517.236	223.732	293.504	-69.772	0.735423	0.639561	hypothetical protein
LOC_Os02g47200	turquoise	0.342581	17.7511	6.56397	11.1871	-4.62313	0.342581	0.443096	transposon protein, putative, unclassified, expressed
LOC_Os09g38500	turquoise	0.278084	222.018	62.0013	160.017	-98.0156	0.278084	0.188636	mitochondrial glycoprotein, putative, expressed
LOC_Os04g37740	turquoise	0.317158	26.7248	6.3291	20.3957	-14.0666	0.317158	0.0446448	zinc finger, C3HC4 type domain containing protein, expressed
LOC_Os04g45410	turquoise	0.316931	232.999	78.4404	154.558	-76.1179	0.316931	0.00536561	retrotransposon protein, putative, Ty3-gypsy subclass, expressed
LOC_Os09g38550	turquoise	0.859136	755.255	489.675	265.581	224.094	0.859136	0.437311	protein phosphatase 2C, putative, expressed
LOC_Os02g47230	turquoise	0.717703	361.142	205.075	156.067	49.0081	0.717703	0.524058	Disease resistance/zinc finger/chromosome condensation-like region protein, putative, expressed
LOC_Os12g10590	turquoise	0.754595	368.876	231.796	137.08	94.7164	0.754595	0.618508	OsClp13 - Putative Clp protease homologue, expressed
LOC_Os01g12490	turquoise	0.883048	1288.92	768.608	520.314	248.294	0.883048	0.761706	flavin monooxygenase, putative, expressed
LOC_Os04g37720	turquoise	0.459025	299.792	103.288	196.505	-93.2171	0.459025	0.173601	pentatricopeptide, putative, expressed
LOC_Os01g31570	turquoise	0.756383	358.806	258.271	100.535	157.735	0.756383	0.681997	expressed protein
LOC_Os12g10560	turquoise	0.511705	159.766	45.7718	113.994	-68.2227	0.511705	0.532862	clathrin adaptor complex small chain domain containing protein, expressed
LOC_Os03g08754	turquoise	0.568962	480.964	183.779	297.185	-113.406	0.568962	0.0732863	OsMADS47 - MADS-box family gene with MIKCc type-box, expressed
LOC_Os11g18320	turquoise	0.733382	566.341	415.234	151.108	264.126	0.733382	0.536482	expressed protein
LOC_Os01g12470	turquoise	0.945191	1335.85	863.82	472.027	391.793	0.945191	0.62774	mitochondrial carrier protein, putative, expressed
LOC_Os01g12430	turquoise	0.625252	260.162	106.906	153.256	-46.3494	0.625252	0.218217	receptor-like protein kinase, putative, expressed
LOC_Os01g12410	turquoise	0.402951	57.7937	19.8905	37.9032	-18.0128	0.402951	0.430274	receptor-like protein kinase, putative, expressed
LOC_Os04g01990	turquoise	0.821392	878.46	466.582	411.878	54.7038	0.821392	0.603367	pentatricopeptide domain containing protein, putative, expressed
LOC_Os01g48700	turquoise	0.611456	260.885	107.039	153.847	-46.8083	0.611456	0.111178	transcription factor Dp, putative, expressed
LOC_Os09g38600	turquoise	0.896396	1319.65	666.69	652.963	13.7265	0.896396	0.566935	expressed protein
LOC_Os01g12420	turquoise	0.496268	95.1502	32.2578	62.8924	-30.6347	0.496268	0.311409	receptor-like protein kinase, putative, expressed
LOC_Os06g17730	turquoise	0.598397	506.135	177.234	328.901	-151.668	0.598397	0.344909	plastocyanin-like domain containing protein, putative, expressed
LOC_Os02g55010	turquoise	0.85031	636.877	485.093	151.784	333.309	0.85031	0.587197	expressed protein
LOC_Os03g40920	turquoise	0.206226	122.886	27.2365	95.6491	-68.4126	0.206226	0.192767	expressed protein
LOC_Os08g21541	turquoise	0.524307	162.388	65.7327	96.6558	-30.9232	0.524307	0.503695	expressed protein
LOC_Os01g35830	turquoise	0.613302	284.682	86.4541	198.228	-111.774	0.613302	0.572283	expressed protein
LOC_Os11g14030	turquoise	0.5523	66.5461	32.0278	34.5184	-2.49061	0.5523	0.256718	expressed protein
LOC_Os06g44460	turquoise	0.714526	519.175	361.219	157.956	203.262	0.714526	0.650904	D-3-phosphoglycerate dehydrogenase, chloroplast precursor, putative, expressed
LOC_Os02g55040	turquoise	0.482476	227.764	84.8908	142.873	-57.982	0.482476	0.216494	expressed protein
LOC_Os08g09200	turquoise	0.723877	573.647	231.26	342.387	-111.127	0.723877	0.373079	aconitate hydratase protein, putative, expressed
LOC_Os06g01630	turquoise	0.878395	1067.4	597.921	469.479	128.442	0.878395	0.492749	2-oxo acid dehydrogenases acyltransferase domain containing protein, expressed
LOC_Os06g44470	turquoise	0.956799	1622.14	1150.01	472.129	677.884	0.956799	0.789351	pollen allergen, putative, expressed
LOC_Os03g40980	turquoise	0.558951	67.4368	41.4011	26.0357	15.3653	0.558951	0.446176	retrotransposon protein, putative, Ty3-gypsy subclass
LOC_Os12g03030	turquoise	0.841534	716.385	544.466	171.919	372.548	0.841534	0.604432	conserved hypothetical protein
LOC_Os10g02410	turquoise	0.896237	921.158	642.754	278.404	364.349	0.896237	0.688163	expressed protein
LOC_Os03g04560	turquoise	0.967171	1726.34	1124.74	601.593	523.151	0.967171	0.761728	expressed protein
LOC_Os07g04980	turquoise	0.925193	1034.46	800.334	234.128	566.206	0.925193	0.600669	expressed protein
LOC_Os12g10850	turquoise	0.340684	37.6777	15.7526	21.9251	-6.17257	0.340684	0.134094	hhH-GPD superfamily base excision DNA repair protein, putative, expressed
LOC_Os03g04550	turquoise	0.484849	306.58	133.373	173.207	-39.8338	0.484849	0.15376	expressed protein
LOC_Os03g04530	turquoise	0.796218	552.501	336.102	216.399	119.703	0.796218	0.783725	cytochrome P450, putative, expressed
LOC_Os12g38210	turquoise	0.834352	844.52	413.595	430.925	-17.3304	0.834352	0.54801	spotted leaf 11, putative, expressed
LOC_Os07g31599	turquoise	0.775248	593.926	314.559	279.368	35.1911	0.775248	0.697938	expressed protein
LOC_Os03g45170	turquoise	0.817524	584.408	368.76	215.648	153.112	0.817524	0.672286	amino acid permease, putative, expressed
LOC_Os12g38260	turquoise	0.964036	1491	1086.82	404.175	682.647	0.964036	0.761179	expressed protein
LOC_Os06g29350	turquoise	0.975669	1602.67	1111.61	491.061	620.544	0.975669	0.774595	myosin, putative, expressed
LOC_Os12g38250	turquoise	0.381239	39.0011	12.1241	26.877	-14.7529	0.381239	0.12796	expressed protein
LOC_Os02g14090	turquoise	0.845426	1223.59	489.287	734.306	-245.019	0.845426	0.559286	berberine and berberine like domain containing protein, expressed
LOC_Os09g38670	turquoise	0.869918	836.294	548.516	287.778	260.738	0.869918	0.630784	thioredoxin, putative, expressed
LOC_Os07g04910	turquoise	0.827042	823.195	423.026	400.168	22.858	0.827042	0.46801	reticulon domain containing protein, putative, expressed
LOC_Os10g34370	turquoise	0.628823	360.87	137.937	222.933	-84.9962	0.628823	0.48553	expressed protein
LOC_Os11g18660	turquoise	0.61869	330.041	138.934	191.108	-52.1741	0.61869	0.292687	expressed protein
LOC_Os01g12160	turquoise	0.446658	164.315	41.8186	122.496	-80.6774	0.446658	0.0645068	OsGH3.3 - Probable indole-3-acetic acid-amido synthetase, expressed
LOC_Os02g30790	turquoise	0.824236	577.128	405.552	171.575	233.977	0.824236	0.601143	SAR DNA-binding protein-like, putative, expressed
LOC_Os05g30860	turquoise	0.833352	869.884	476.667	393.217	83.4498	0.833352	0.65203	expressed protein
LOC_Os03g04500	turquoise	0.823487	807.994	461.569	346.425	115.144	0.823487	0.720364	tetratricopeptide repeat domain containing protein, expressed
LOC_Os09g38630	turquoise	0.391444	142.565	61.5196	81.045	-19.5254	0.391444	0.0210214	expressed protein
LOC_Os03g10060	turquoise	0.890202	1302.91	647.505	655.404	-7.89834	0.890202	0.795515	S10/S20 domain containing ribosomal protein, putative, expressed
LOC_Os01g31220	turquoise	0.37713	88.2433	25.8039	62.4395	-36.6356	0.37713	0.110171	expressed protein
LOC_Os09g02130	turquoise	0.281658	67.3512	26.4233	40.9279	-14.5046	0.281658	0.0186349	expressed protein
LOC_Os09g38700	turquoise	0.980344	1664.58	1200.5	464.086	736.412	0.980344	0.757875	STRUBBELIG-RECEPTOR FAMILY 5 precursor, putative, expressed
LOC_Os06g44540	turquoise	0.890438	1200.59	618.209	582.376	35.8324	0.890438	0.684616	HOTHEAD precursor, putative, expressed
LOC_Os11g03760	turquoise	0.560656	154.446	53.1632	101.283	-48.1201	0.560656	0.572214	expressed protein
LOC_Os06g17830	turquoise	0.296123	38.3241	9.35872	28.9654	-19.6067	0.296123	0.332719	oxidoreductase, 2OG-Fe oxygenase family protein, putative, expressed
LOC_Os05g30940	turquoise	0.90313	1137.75	895.107	242.639	652.468	0.90313	0.69561	vacuolar calcium binding protein, putative, expressed
LOC_Os08g21879	turquoise	0.916351	1085.17	754.179	330.996	423.183	0.916351	0.776062	expressed protein
LOC_Os03g14334	turquoise	0.875657	823.543	576.673	246.87	329.803	0.875657	0.725741	expressed protein
LOC_Os01g48640	turquoise	0.50345	59.9727	26.5106	33.462	-6.95139	0.50345	0.423164	expressed protein
LOC_Os03g10110	turquoise	0.548465	75.8487	39.1329	36.7158	2.41703	0.548465	0.294367	cupin domain containing protein, expressed
LOC_Os05g23700	turquoise	0.866422	736.302	527.904	208.398	319.506	0.866422	0.577168	DNA-binding storekeeper protein-related, putative, expressed
LOC_Os02g55100	turquoise	0.558816	119.232	43.3914	75.8409	-32.4495	0.558816	0.533767	expressed protein
LOC_Os04g29670	turquoise	0.910976	1131.27	765.123	366.149	398.973	0.910976	0.79267	expressed protein
LOC_Os07g31650	turquoise	0.801559	647.493	363.589	283.905	79.684	0.801559	0.500202	expressed protein
LOC_Os04g33110	turquoise	0.572807	182.942	86.0529	96.8889	-10.836	0.572807	0.506663	expressed protein
LOC_Os11g14180	turquoise	0.396163	208.766	62.4537	146.313	-83.859	0.396163	0.113429	expressed protein
LOC_Os01g35720	turquoise	0.527573	76.8812	40.0379	36.8432	3.19474	0.527573	0.446138	retrotransposon protein, putative, Ty3-gypsy subclass, expressed
LOC_Os02g55190	turquoise	0.384363	22.0292	7.72025	14.309	-6.58873	0.384363	0.399508	expressed protein
LOC_Os12g10740	turquoise	0.295024	101.479	22.0153	79.4637	-57.4484	0.295024	0.107282	leucine-rich repeat family protein, putative, expressed
LOC_Os10g02584	turquoise	0.494628	166.027	40.1892	125.837	-85.6481	0.494628	0.514132	GAGA-binding protein, putative, expressed
LOC_Os06g29490	turquoise	0.713458	419.679	208.013	211.666	-3.65349	0.713458	0.317783	expressed protein
LOC_Os12g10720	turquoise	0.917679	1514.65	767.801	746.852	20.9488	0.917679	0.787668	glutathione S-transferase, putative, expressed
LOC_Os07g47010	turquoise	0.591331	93.4108	58.7627	34.6481	24.1146	0.591331	0.41216	transposon protein, putative, unclassified, expressed
LOC_Os02g22590	turquoise	0.692584	376.621	197.376	179.244	18.1323	0.692584	0.486411	expressed protein
LOC_Os04g50740	turquoise	0.566261	226.299	60.0395	166.26	-106.22	0.566261	0.695836	ara54-like RING finger protein, putative, expressed
LOC_Os03g04690	turquoise	0.839848	865.935	488.867	377.068	111.8	0.839848	0.664245	expressed protein
LOC_Os04g50730	turquoise	0.654706	390.733	131.446	259.286	-127.84	0.654706	0.54963	RWD domain containing protein, expressed
LOC_Os02g22580	turquoise	0.671347	248.748	138.572	110.177	28.3949	0.671347	0.487775	expressed protein
LOC_Os07g47040	turquoise	0.740791	600.384	323.427	276.957	46.47	0.740791	0.379068	expressed protein
LOC_Os01g12260	turquoise	0.796364	827.64	420.143	407.496	12.647	0.796364	0.479123	vacuolar ATP synthase subunit E, putative, expressed
LOC_Os03g08980	turquoise	0.902696	1207.25	902.797	304.453	598.345	0.902696	0.735465	expressed protein
LOC_Os01g63620	turquoise	0.927085	1390.82	942.591	448.229	494.363	0.927085	0.767816	expressed protein
LOC_Os11g18570	turquoise	0.829156	853.43	401.798	451.631	-49.8328	0.829156	0.48913	cytochrome P450, putative, expressed
LOC_Os04g45600	turquoise	0.683613	340.18	139.132	201.047	-61.915	0.683613	0.530044	NDH-M H PLASTOQUINONE DEHY, putative, expressed
LOC_Os03g04600	turquoise	0.768243	556.597	287.762	268.835	18.9269	0.768243	0.481198	expressed protein
LOC_Os04g45610	turquoise	0.952111	1642.26	958.355	683.909	274.446	0.952111	0.751743	expressed protein
LOC_Os01g12230	turquoise	0.708802	423.178	165.521	257.657	-92.1365	0.708802	0.576504	peptidase C45, acyl-coenzyme A/6-aminopenicillanic acid acyl-transferase, putative, expressed
LOC_Os09g38784	turquoise	0.625141	174.057	78.872	95.1853	-16.3133	0.625141	0.417374	retrotransposon protein, putative, unclassified, expressed
LOC_Os03g08999	turquoise	0.638354	269.734	143.458	126.276	17.182	0.638354	0.783273	dehydrogenase, putative, expressed
LOC_Os01g63610	turquoise	0.946389	1484.89	907.936	576.956	330.98	0.946389	0.763493	retrotransposon protein, putative, unclassified, expressed
LOC_Os03g04620	turquoise	0.922619	1362.2	1022.19	340.012	682.178	0.922619	0.743879	CCT motif family protein, expressed
LOC_Os04g45665	turquoise	0.609431	218.954	96.0757	122.878	-26.8026	0.609431	0.678653	hypothetical protein
LOC_Os09g38755	turquoise	0.778806	629.622	337.877	291.745	46.1321	0.778806	0.501581	E3 ubiquitin-protein ligase HERC2, putative, expressed
LOC_Os08g33920	turquoise	0.0997396	81.6114	20.3282	61.2832	-40.9549	0.0997396	0.126584	60S ribosomal protein L34, putative, expressed
LOC_Os05g23890	turquoise	0.613745	136.636	78.7596	57.8764	20.8832	0.613745	0.180426	retrotransposon protein, putative, LINE subclass, expressed
LOC_Os06g44640	turquoise	0.802243	1091.98	452.03	639.95	-187.92	0.802243	0.687161	expressed protein
LOC_Os04g37450	turquoise	0.905934	1119.34	676.721	442.62	234.101	0.905934	0.716875	expressed protein
LOC_Os04g06520	turquoise	0.498357	116.976	37.8289	79.1471	-41.3181	0.498357	0.678267	expressed protein
LOC_Os06g44660	turquoise	0.938274	1846.61	909.855	936.758	-26.9038	0.938274	0.829377	fasciclin-like arabinogalactan precursor protein, putative, expressed
LOC_Os12g03200	turquoise	0.331647	88.1175	23.5438	64.5737	-41.0299	0.331647	0.116845	MATE efflux family protein, putative, expressed
LOC_Os05g23830	turquoise	0.350621	91.4433	17.7574	73.6859	-55.9285	0.350621	0.600435	endo-1,4-beta-xylanase, putative, expressed
LOC_Os04g37460	turquoise	0.964626	1950.91	1054.4	896.504	157.901	0.964626	0.744637	glutamate decarboxylase, putative, expressed
LOC_Os04g37470	turquoise	0.825946	798.862	435.142	363.72	71.4227	0.825946	0.562478	oxidoreductase, aldo/keto reductase family protein, putative, expressed
LOC_Os02g30810	turquoise	0.750908	639.924	469.636	170.288	299.348	0.750908	0.596635	OsSAUR10 - Auxin-responsive SAUR gene family member, expressed
LOC_Os07g31740	turquoise	0.668347	444.873	201.726	243.146	-41.4201	0.668347	0.484378	expressed protein
LOC_Os06g01850	turquoise	0.694385	302.522	159.949	142.574	17.3751	0.694385	0.44697	ferredoxin--NADP reductase, chloroplast precursor, putative, expressed
LOC_Os12g03250	turquoise	0.922779	1301.32	860.074	441.244	418.83	0.922779	0.809154	retrotransposon protein, putative, unclassified, expressed
LOC_Os04g33040	turquoise	0.825818	974.743	450.439	524.304	-73.8647	0.825818	0.833086	alpha-amylase precursor, putative, expressed
LOC_Os06g01890	turquoise	0.668303	363.853	166.934	196.918	-29.9843	0.668303	0.731103	MADS-box transcription factor, putative, expressed
LOC_Os11g10250	turquoise	0.391017	45.4874	11.4647	34.0226	-22.5579	0.391017	0.466568	expressed protein
LOC_Os02g10780	turquoise	0.556406	133.128	51.7391	81.3893	-29.6501	0.556406	0.441653	SPX domain containing protein, putative, expressed
LOC_Os03g57870	turquoise	0.156327	79.4605	22.7854	56.6751	-33.8897	0.156327	0.0639691	RFC3 - Putative clamp loader of PCNA, replication factor C subunit 3, expressed
LOC_Os04g50790	turquoise	0.71904	491.457	217.36	274.097	-56.7376	0.71904	0.657135	RNA recognition motif, putative, expressed
LOC_Os02g10720	turquoise	0.805342	772.941	436.675	336.266	100.409	0.805342	0.871954	expressed protein
LOC_Os02g39630	turquoise	0.709018	439.68	197.519	242.161	-44.6422	0.709018	0.737819	iron-stress related protein, putative, expressed
LOC_Os07g08040	turquoise	0.827494	717.579	393.362	324.217	69.1447	0.827494	0.750568	expressed protein
LOC_Os03g57890	turquoise	0.600509	421.161	142.185	278.976	-136.791	0.600509	0.634795	zinc finger A20 and AN1 domain-containing stress-associated protein, putative, expressed
LOC_Os06g29650	turquoise	0.734524	458.047	245.626	212.421	33.2057	0.734524	0.646205	CDP-diacylglycerol--inositol 3-phosphatidyltransferase 1, putative, expressed
LOC_Os03g61810	turquoise	0.557096	192.578	81.7692	110.809	-29.0398	0.557096	0.530246	tRNA-specific adenosine deaminase, putative, expressed
LOC_Os04g50760	turquoise	0.612584	269.128	85.4741	183.654	-98.1802	0.612584	0.620776	ara54-like RING finger protein, putative, expressed
LOC_Os11g18919	turquoise	0.93232	1102.12	814.891	287.226	527.665	0.93232	0.702275	expressed protein
LOC_Os07g47990	turquoise	0.616655	188.558	85.9086	102.649	-16.7406	0.616655	0.518192	peroxidase precursor, putative, expressed
LOC_Os01g17470	turquoise	0.878263	811.724	565.1	246.624	318.475	0.878263	0.69149	plastocyanin-like domain containing protein, putative, expressed
LOC_Os12g07220	turquoise	0.893592	1121.73	676.928	444.801	232.127	0.893592	0.655024	bacterial transferase hexapeptide domain containing protein, expressed
LOC_Os11g18900	turquoise	0.829492	648.496	401.762	246.735	155.027	0.829492	0.649795	expressed protein
LOC_Os07g08080	turquoise	0.534199	88.7545	40.2698	48.4847	-8.21486	0.534199	0.561374	expressed protein
LOC_Os12g21798	turquoise	0.574754	482.218	181.523	300.695	-119.172	0.574754	0.139601	40S ribosomal protein S3a, putative, expressed
LOC_Os05g46740	turquoise	0.977582	1743.68	1187.18	556.499	630.685	0.977582	0.776061	regulator of chromosome condensation, putative, expressed
LOC_Os07g08060	turquoise	0.900785	1295.12	936.061	359.054	577.007	0.900785	0.751799	transmembrane BAX inhibitor motif-containing protein, putative, expressed
LOC_Os12g21730	turquoise	0.699654	298.368	165.627	132.741	32.8856	0.699654	0.687888	retrotransposon protein, putative, unclassified, expressed
LOC_Os08g01760	turquoise	0.859411	1089.77	490.081	599.69	-109.609	0.859411	0.66668	dehydrogenase, putative, expressed
LOC_Os08g01794	turquoise	0.686953	348.51	147.273	201.236	-53.963	0.686953	0.372686	bromodomain domain containing protein, expressed
LOC_Os12g07230	turquoise	0.549732	248.771	83.5802	165.191	-81.6111	0.549732	0.117757	CAMK_CAMK_like.45 - CAMK includes calcium/calmodulin depedent protein kinases, expressed
LOC_Os01g17402	turquoise	0.257879	75.1346	17.3938	57.7408	-40.347	0.257879	0.136487	cyclin, putative, expressed
LOC_Os05g35980	turquoise	0.654018	211.504	135.154	76.3493	58.8052	0.654018	0.680592	expressed protein
LOC_Os08g01859	turquoise	0.673516	398.926	203.381	195.544	7.83721	0.673516	0.470762	ribosomal protein L30 containing protein, expressed
LOC_Os08g13250	turquoise	0.280583	140.157	45.7797	94.3775	-48.5978	0.280583	0.07703	speckle-type POZ protein, putative, expressed
LOC_Os09g26420	turquoise	0.877115	1084.96	558.701	526.257	32.4437	0.877115	0.85218	AP2 domain containing protein, expressed
LOC_Os09g26430	turquoise	0.970828	1640.97	1149.91	491.062	658.845	0.970828	0.807893	retrotransposon protein, putative, unclassified, expressed
LOC_Os11g32500	turquoise	0.699022	473.491	169.376	304.115	-134.739	0.699022	0.48799	rubredoxin family protein, putative, expressed
LOC_Os09g26440	turquoise	0.93427	1447.72	1042.5	405.221	637.28	0.93427	0.78218	expressed protein
LOC_Os01g17390	turquoise	0.77472	675.144	537.725	137.419	400.306	0.77472	0.620862	OsFBX5 - F-box domain containing protein, expressed
LOC_Os02g42570	turquoise	0.648834	324.143	171.664	152.479	19.1855	0.648834	0.56165	ferredoxin-thioredoxin reductase, variable chain, putative, expressed
LOC_Os11g45320	turquoise	0.280745	117.705	43.0699	74.635	-31.5651	0.280745	0.0510927	expressed protein
LOC_Os01g17360	turquoise	0.526421	107.481	64.8254	42.6557	22.1697	0.526421	0.377719	retrotransposon protein, putative, unclassified, expressed
LOC_Os05g46780	turquoise	0.351347	107.081	27.8825	79.1989	-51.3164	0.351347	0.0570951	transposon protein, putative, CACTA, En/Spm sub-class, expressed
LOC_Os02g26290	turquoise	0.933366	1493.86	1035.4	458.457	576.942	0.933366	0.731201	fasciclin-like arabinogalactan protein 8 precursor, putative, expressed
LOC_Os02g55400	turquoise	0.905177	1232.55	937.354	295.2	642.154	0.905177	0.720425	ATPase 8, plasma membrane-type, putative, expressed
LOC_Os06g05080	turquoise	0.854636	860.822	524.091	336.73	187.361	0.854636	0.528599	cytochrome c oxidase subunit 5B, mitochondrial precursor, putative, expressed
LOC_Os10g22520	turquoise	0.27436	42.5633	9.10916	33.4541	-24.345	0.27436	0.123515	cellulase, putative, expressed
LOC_Os09g26470	turquoise	0.394345	192.741	74.3415	118.399	-44.0578	0.394345	0.0912651	zinc finger, C3HC4 type family protein, expressed
LOC_Os04g29050	turquoise	0.909212	982.017	689.006	293.011	395.995	0.909212	0.607616	expressed protein
LOC_Os04g50864	turquoise	0.787393	893.33	430.85	462.48	-31.6306	0.787393	0.796928	expressed protein
LOC_Os03g61720	turquoise	0.311615	17.0991	5.50935	11.5897	-6.08036	0.311615	0.246707	glycerol-3-phosphate acyltransferase, putative, expressed
LOC_Os03g61710	turquoise	0.802057	774.224	397.051	377.173	19.8779	0.802057	0.692352	GHMP kinases ATP-binding protein, putative, expressed
LOC_Os01g04690	turquoise	0.63282	204.927	91.5133	113.413	-21.9001	0.63282	0.728618	expressed protein
LOC_Os10g14230	turquoise	0.790102	548.6	338.609	209.99	128.619	0.790102	0.704402	transposon protein, putative, unclassified, expressed
LOC_Os04g50820	turquoise	0.89267	1273.67	660.341	613.329	47.0127	0.89267	0.66616	oligopeptide transporter, putative, expressed
LOC_Os10g22570	turquoise	0.220035	118.455	31.1729	87.2817	-56.1089	0.220035	0.181447	cellulase, putative, expressed
LOC_Os03g61750	turquoise	0.698827	320.836	157.18	163.656	-6.47557	0.698827	0.584604	expressed protein
LOC_Os11g10200	turquoise	0.781169	715.956	333.967	381.989	-48.0222	0.781169	0.488457	OsFBX413 - F-box domain containing protein, expressed
LOC_Os11g32490	turquoise	0.990136	1789.81	1208.71	581.103	627.606	0.990136	0.769956	expressed protein
LOC_Os04g01520	turquoise	0.717823	482.856	214.722	268.134	-53.4123	0.717823	0.576971	expressed protein
LOC_Os02g26300	turquoise	0.701638	582.803	220.296	362.508	-142.212	0.701638	0.805612	expressed protein
LOC_Os04g01530	turquoise	0.912698	980.137	710.803	269.334	441.469	0.912698	0.550212	adenylate kinase, putative, expressed
LOC_Os04g06770	turquoise	0.816175	1021.07	474.694	546.375	-71.6804	0.816175	0.771871	argonaute, putative, expressed
LOC_Os08g09650	turquoise	0.831106	1047.58	493.359	554.224	-60.8653	0.831106	0.569141	OsFBX269 - F-box domain containing protein, expressed
LOC_Os04g01540	turquoise	0.88495	1359.91	594.949	764.963	-170.015	0.88495	0.75483	expressed protein
LOC_Os02g26320	turquoise	0.767639	621.27	496.393	124.877	371.517	0.767639	0.593755	fasciclin-like arabinogalactan precursor protein, putative, expressed
LOC_Os08g09640	turquoise	0.905001	1577.55	739.611	837.943	-98.3329	0.905001	0.662379	OsFBL43 - F-box domain and LRR containing protein, expressed
LOC_Os04g01550	turquoise	0.505478	78.4271	37.3015	41.1255	-3.82402	0.505478	0.380202	peroxidase precursor, putative, expressed
LOC_Os03g61900	turquoise	0.662039	324.966	126.145	198.821	-72.6764	0.662039	0.433372	expressed protein
LOC_Os04g01560	turquoise	0.716238	440.008	205.273	234.735	-29.4621	0.716238	0.804036	expressed protein
LOC_Os07g43970	turquoise	0.602351	167.628	82.8322	84.7958	-1.96361	0.602351	0.46755	calmodulin-binding protein, putative, expressed
LOC_Os07g43960	turquoise	0.74497	618.273	292.216	326.057	-33.8407	0.74497	0.397827	expressed protein
LOC_Os04g50870	turquoise	0.866292	686.709	528.688	158.021	370.667	0.866292	0.584393	elongation factor Tu, putative, expressed
LOC_Os07g43990	turquoise	0.755162	717.9	301.359	416.542	-115.183	0.755162	0.398642	expressed protein
LOC_Os03g57770	turquoise	0.598291	130.921	65.1062	65.8144	-0.708216	0.598291	0.411355	expressed protein
LOC_Os05g46610	turquoise	0.906362	1326.94	728.318	598.619	129.699	0.906362	0.77033	myb-like DNA-binding domain containing protein, putative, expressed
LOC_Os05g46620	turquoise	0.937735	1363.3	865.011	498.292	366.718	0.937735	0.688174	chaperone protein dnaJ 10, putative, expressed
LOC_Os02g55470	turquoise	0.53773	190.393	66.4349	123.958	-57.5229	0.53773	0.344199	alpha-1,6-mannosyl-glycoprotein 2-beta-N-acetylglucosaminyltransferase, putative, expressed
LOC_Os07g43940	turquoise	0.822759	711.042	395.311	315.731	79.5794	0.822759	0.606793	X8 domain containing protein, expressed
LOC_Os12g07110	turquoise	0.808919	548.225	323.315	224.91	98.4058	0.808919	0.464094	acyl-CoA synthetase protein, putative, expressed
LOC_Os08g01650	turquoise	0.501143	103.107	31.5803	71.5272	-39.9469	0.501143	0.366836	Rf1, mitochondrial precursor, putative, expressed
LOC_Os03g26220	turquoise	0.345499	100.088	29.2193	70.8686	-41.6494	0.345499	0.148379	expressed protein
LOC_Os04g01510	turquoise	0.559346	202.599	73.2633	129.336	-56.0727	0.559346	0.304028	DUF1295 domain containing protein, putative, expressed
LOC_Os12g21710	turquoise	0.742897	333.194	226.539	106.655	119.884	0.742897	0.617518	nnrU, putative, expressed
LOC_Os02g55510	turquoise	0.921655	1218.91	881.679	337.232	544.446	0.921655	0.758751	CXXXC2 - Cysteine-rich protein with paired CXXXC motifs precursor, putative, expressed
LOC_Os02g55500	turquoise	0.952216	1461.34	1082.83	378.513	704.316	0.952216	0.778145	expressed protein
LOC_Os02g55520	turquoise	0.706966	475.386	225.45	249.936	-24.4853	0.706966	0.278904	zinc finger, C3HC4 type domain containing protein, expressed
LOC_Os05g46630	turquoise	0.617914	137.591	90.6383	46.9527	43.6857	0.617914	0.608735	expressed protein
LOC_Os08g13380	turquoise	0.746624	434.106	296.339	137.767	158.572	0.746624	0.583286	expressed protein
LOC_Os09g26560	turquoise	0.667562	452.259	173.448	278.811	-105.363	0.667562	0.517422	expressed protein
LOC_Os03g16440	turquoise	0.591341	385.365	154.006	231.359	-77.3531	0.591341	0.346214	outer membrane protein, OMP85 family, putative, expressed
LOC_Os10g22630	turquoise	0.233527	60.138	10.6029	49.535	-38.9321	0.233527	0.154882	expressed protein
LOC_Os04g50970	turquoise	0.780697	584.551	313.251	271.3	41.9514	0.780697	0.62951	seed specific protein Bn15D1B, putative, expressed
LOC_Os02g26390	turquoise	0.976174	1693.33	1190.12	503.21	686.914	0.976174	0.787477	expressed protein
LOC_Os03g61840	turquoise	0.914233	1250.53	722.264	528.268	193.996	0.914233	0.599675	expressed protein
LOC_Os08g13310	turquoise	0.935575	1159.67	885.259	274.413	610.845	0.935575	0.692432	expressed protein
LOC_Os03g16420	turquoise	0.895753	1403.3	784.328	618.976	165.352	0.895753	0.840654	retrotransposon protein, putative, unclassified, expressed
LOC_Os06g17450	turquoise	0.928504	1470.2	1003.95	466.251	537.699	0.928504	0.800788	expressed protein
LOC_Os06g29890	turquoise	0.582627	231.866	92.6362	139.23	-46.5936	0.582627	0.608129	retrotransposon protein, putative, unclassified, expressed
LOC_Os02g10500	turquoise	0.641119	217.976	99.7234	118.252	-18.529	0.641119	0.440522	expressed protein
LOC_Os02g10510	turquoise	0.920981	1598.58	835.834	762.743	73.0913	0.920981	0.706794	Ubiquitin family domain containing protein, expressed
LOC_Os07g08210	turquoise	0.751821	533.619	272.197	261.423	10.7744	0.751821	0.697569	cytidylyltransferase domain containing protein, expressed
LOC_Os11g10000	turquoise	0.713641	491.373	244.235	247.138	-2.90319	0.713641	0.33867	mTERF family protein, expressed
LOC_Os02g10530	turquoise	0.849248	935.515	740.444	195.071	545.373	0.849248	0.674185	expressed protein
LOC_Os05g35710	turquoise	0.794642	622.657	346.821	275.836	70.9845	0.794642	0.512338	coiled-coil domain-containing protein 47 precursor, putative, expressed
LOC_Os01g04814	turquoise	0.70481	440.849	208.736	232.113	-23.3764	0.70481	0.222235	vacuolar protein sorting-associating protein 4B, putative, expressed
LOC_Os04g06850	turquoise	0.531317	221.224	67.8565	153.368	-85.511	0.531317	0.1863	expressed protein
LOC_Os09g18410	turquoise	0.639246	198.384	91.981	106.403	-14.4224	0.639246	0.282708	retrotransposon protein, putative, Ty3-gypsy subclass, expressed
LOC_Os11g22510	turquoise	0.659969	196.115	109.135	86.9805	22.1542	0.659969	0.512094	retrotransposon protein, putative, Ty3-gypsy subclass, expressed
LOC_Os04g13220	turquoise	0.583427	300.564	128.068	172.496	-44.4279	0.583427	0.165194	ABC transporter family protein, putative, expressed
[truncated: 3,853 more rows]

## Sheet: All gene of magenta
GeneID	module	geneModuleMembership	kTotal	kWithin	kOut	kDiff	KME	GS
LOC_Os03g25920	magenta	0.794055	555.159	99.1584	456.001	-356.842	0.794055	0.776766	amino acid permease family protein, putative, expressed
LOC_Os12g13460	magenta	0.79906	646.477	86.6629	559.814	-473.151	0.79906	0.748692	SET domain-containing protein, putative, expressed
LOC_Os01g29870	magenta	0.887341	289.383	123.45	165.933	-42.4836	0.887341	0.737026	multidrug resistance protein 9, putative, expressed
LOC_Os12g39120	magenta	0.784362	181.268	71.1495	110.119	-38.9694	0.784362	0.6591	protein phosphatase 2C, putative, expressed
LOC_Os07g32480	magenta	0.790876	133.15	64.805	68.345	-3.54001	0.790876	0.413858	mitotic checkpoint serine/threonine-protein kinase BUB1, putative, expressed
LOC_Os02g46030	magenta	0.904699	349.747	152.85	196.897	-44.0467	0.904699	0.718742	MYB family transcription factor, putative, expressed
LOC_Os03g46060	magenta	0.765496	216.303	70.0839	146.219	-76.1354	0.765496	0.50365	thaumatin family domain containing protein, expressed
LOC_Os03g46070	magenta	0.837941	570.555	113.854	456.701	-342.846	0.837941	0.906656	thaumatin, putative, expressed
LOC_Os12g02470	magenta	0.768598	154.988	54.2426	100.745	-46.5026	0.768598	0.692941	WRKY65, expressed
LOC_Os12g18950	magenta	0.670352	86.2044	32.2273	53.9771	-21.7498	0.670352	0.476209	retrotransposon protein, putative, unclassified, expressed
LOC_Os07g48610	magenta	0.74914	721.504	76.8869	644.617	-567.73	0.74914	0.773605	hydrolase, alpha/beta fold family domain containing protein, expressed
LOC_Os11g15040	magenta	0.712605	82.9716	33.2623	49.7093	-16.4471	0.712605	0.573205	S-adenosyl-L-methionine:benzoic acid/salicylic acid carboxyl methyltransferase, putative, expressed
LOC_Os06g04460	magenta	0.659515	92.6046	31.0044	61.6002	-30.5958	0.659515	0.16699	hypersensitive-induced response protein, putative, expressed
LOC_Os12g13400	magenta	0.59804	96.3266	18.0253	78.3013	-60.2761	0.59804	0.473246	expressed protein
LOC_Os07g32570	magenta	0.837213	306.06	109.745	196.315	-86.5708	0.837213	0.622055	OsAPRL1 adenosine 5'-phosphosulfate reductase-like OsAPRL1, expressed
LOC_Os03g52670	magenta	0.776683	238.018	74.9749	163.043	-88.0685	0.776683	0.56352	GRAM domain containing protein, expressed
LOC_Os06g43800	magenta	0.725925	117.941	52.3602	65.5812	-13.2211	0.725925	0.430048	methyltransferase domain containing protein, putative, expressed
LOC_Os05g31910	magenta	0.700393	396.012	57.7328	338.279	-280.547	0.700393	0.760832	white-brown complex homolog protein 16, putative, expressed
LOC_Os12g02340	magenta	0.91093	548.415	156.235	392.179	-235.944	0.91093	0.855326	LTPL14 - Protease inhibitor/seed storage/LTP family protein precursor, expressed
LOC_Os02g21700	magenta	0.68786	168.628	44.5507	124.078	-79.5271	0.68786	0.687475	STE_MEKK_ste11_MAP3K.8 - STE kinases include homologs to sterile 7, sterile 11 and sterile 20 from yeast, expressed
LOC_Os12g02330	magenta	0.630314	84.945	23.3495	61.5955	-38.246	0.630314	0.308451	LTPL13 - Protease inhibitor/seed storage/LTP family protein precursor, expressed
LOC_Os03g09810	magenta	0.526384	30.6363	9.86054	20.7757	-10.9152	0.526384	0.304291	polyamine oxidase precursor, putative, expressed
LOC_Os02g15860	magenta	0.738633	209.782	62.8747	146.907	-84.0328	0.738633	0.514106	expressed protein
LOC_Os03g13540	magenta	0.734071	300.657	54.3105	246.347	-192.036	0.734071	0.570925	Ser/Thr protein phosphatase family protein, putative, expressed
LOC_Os07g48730	magenta	0.746616	239.941	52.0196	187.922	-135.902	0.746616	0.6981	tyrosine protein kinase domain containing protein, putative, expressed
LOC_Os01g71670	magenta	0.86117	458.035	131.635	326.4	-194.765	0.86117	0.788013	glycosyl hydrolases family 17, putative, expressed
LOC_Os06g39970	magenta	0.674608	126.375	30.3494	96.0255	-65.676	0.674608	0.556139	CESA11 - cellulose synthase, expressed
LOC_Os06g23560	magenta	0.738327	139.215	56.4634	82.7512	-26.2877	0.738327	0.475551	anthocyanidin 5,3-O-glucosyltransferase, putative, expressed
LOC_Os02g21810	magenta	0.875985	233.952	115.815	118.137	-2.32136	0.875985	0.461913	cytochrome P450 51, putative, expressed
LOC_Os01g71380	magenta	0.832563	307.588	93.7525	213.836	-120.083	0.832563	0.742967	glycosyl hydrolases family 17, putative, expressed
LOC_Os08g44870	magenta	0.844528	225.231	106.622	118.608	-11.9861	0.844528	0.371201	MATE efflux family protein, putative, expressed
LOC_Os07g36810	magenta	0.613391	83.3574	20.3519	63.0055	-42.6535	0.613391	0.33421	expressed protein
LOC_Os12g02250	magenta	0.87132	235.374	105.926	129.448	-23.5216	0.87132	0.41185	STE_PAK_Ste20_Slob_Wnk.3 - STE kinases include homologs to sterile 7, sterile 11 and sterile 20 from yeast, expressed
LOC_Os01g71340	magenta	0.78006	380.008	95.7912	284.217	-188.426	0.78006	0.68634	glycosyl hydrolases family 17, putative, expressed
LOC_Os12g39220	magenta	0.963124	385.382	191.98	193.402	-1.42221	0.963124	0.712164	ZOS12-08 - C2H2 zinc finger protein, expressed
LOC_Os11g07090	magenta	0.655607	61.9572	27.0019	34.9553	-7.95336	0.655607	0.28888	pectinesterase, putative, expressed
LOC_Os07g48596	magenta	0.644442	43.7604	17.4251	26.3353	-8.91016	0.644442	0.479593	Myb transcription factor, putative, expressed
LOC_Os12g41390	magenta	0.739969	136.628	57.4086	79.219	-21.8104	0.739969	0.452483	homocysteine S-methyltransferase protein, putative, expressed
LOC_Os09g32760	magenta	0.723036	110.692	43.4774	67.2151	-23.7377	0.723036	0.310188	acyl-ACP thioesterase, putative, expressed
LOC_Os10g23060	magenta	0.756165	127.719	48.982	78.7371	-29.7551	0.756165	0.306441	expressed protein
LOC_Os12g25660	magenta	0.610308	76.8672	14.0929	62.7744	-48.6815	0.610308	0.642707	cytochrome P450, putative, expressed
LOC_Os09g32730	magenta	0.800747	401.41	74.5675	326.843	-252.275	0.800747	0.822154	zinc finger, C3HC4 type domain containing protein, expressed
LOC_Os04g38530	magenta	0.776095	143.051	69.5287	73.5224	-3.99375	0.776095	0.380819	aldose 1-epimerase, putative, expressed
LOC_Os01g71460	magenta	0.623453	110.314	21.962	88.3523	-66.3903	0.623453	0.423683	OsFBDUF11 - F-box and DUF domain containing protein, expressed
LOC_Os07g48290	magenta	0.705453	108.475	44.3551	64.1194	-19.7643	0.705453	0.216636	AGC_AGC_other_RS6K_like.2 - ACG kinases include homologs to PKA, PKG and PKC, expressed
LOC_Os10g28200	magenta	0.75465	196.119	71.0984	125.02	-53.9221	0.75465	0.448046	NAD dependent epimerase/dehydratase family protein, putative, expressed
LOC_Os01g25990	magenta	0.600871	28.3216	10.4285	17.8932	-7.46467	0.600871	0.379996	expressed protein
LOC_Os06g43270	magenta	0.695154	114.94	45.3257	69.6147	-24.289	0.695154	0.398554	protein kinase domain containing protein, expressed
LOC_Os07g09190	magenta	0.788765	162.633	78.7192	83.9137	-5.19446	0.788765	0.34032	transketolase, putative, expressed
LOC_Os01g49920	magenta	0.428311	31.1863	5.02414	26.1621	-21.138	0.428311	0.264768	protein kinase, putative, expressed
LOC_Os11g02424	magenta	0.912668	458.174	158.77	299.404	-140.634	0.912668	0.835711	LTPL9 - Protease inhibitor/seed storage/LTP family protein precursor, expressed
LOC_Os11g02400	magenta	0.856392	383.334	114.315	269.018	-154.703	0.856392	0.684497	LTPL8 - Protease inhibitor/seed storage/LTP family protein precursor, expressed
LOC_Os01g64910	magenta	0.671553	99.1136	23.9746	75.139	-51.1644	0.671553	0.581002	anthocyanidin 5,3-O-glucosyltransferase, putative, expressed
LOC_Os02g56600	magenta	0.846414	455.373	113.339	342.033	-228.694	0.846414	0.771629	no apical meristem protein, putative, expressed
LOC_Os12g39400	magenta	0.811485	186.233	73.6952	112.538	-38.8424	0.811485	0.719236	ZOS12-09 - C2H2 zinc finger protein, expressed
LOC_Os01g41430	magenta	0.805062	227.598	79.1484	148.45	-69.3014	0.805062	0.618995	UDP-glucoronosyl and UDP-glucosyl transferase, putative, expressed
LOC_Os06g28124	magenta	0.868844	218.599	102.255	116.343	-14.0877	0.868844	0.579533	glycosyltransferase, putative, expressed
LOC_Os10g03950	magenta	0.6089	43.2666	15.9272	27.3394	-11.4121	0.6089	0.447041	legume lectins beta domain containing protein, putative, expressed
LOC_Os06g43384	magenta	0.953844	347.252	189.572	157.68	31.8929	0.953844	0.698891	cytochrome P450, putative, expressed
LOC_Os05g51240	magenta	0.735979	147.42	49.6602	97.7599	-48.0997	0.735979	0.588177	hydrolase, alpha/beta fold family domain containing protein, expressed
LOC_Os11g02540	magenta	0.748271	143.984	54.6196	89.3645	-34.7449	0.748271	0.534219	WRKY50, expressed
LOC_Os03g05610	magenta	0.782386	243.487	80.6253	162.861	-82.236	0.782386	0.535685	inorganic phosphate transporter, putative, expressed
LOC_Os03g05600	magenta	0.611941	68.7602	17.629	51.1312	-33.5022	0.611941	0.355207	hypothetical protein
LOC_Os04g38940	magenta	0.934623	303.028	163.366	139.662	23.7044	0.934623	0.653084	integral membrane protein, putative, expressed
LOC_Os04g44230	magenta	0.738647	183.162	59.7447	123.418	-63.673	0.738647	0.707	cytokinin dehydrogenase precursor, putative, expressed
LOC_Os04g44240	magenta	0.972594	316.556	198.788	117.768	81.0204	0.972594	0.64864	cytokinin-O-glucosyltransferase 3, putative, expressed
LOC_Os02g21340	magenta	0.839207	315.256	118.475	196.78	-78.3053	0.839207	0.682245	ABC-2 type transporter family protein, expressed
LOC_Os04g44250	magenta	0.830905	185.78	82.8341	102.946	-20.1117	0.830905	0.751473	cytokinin-O-glucosyltransferase 3, putative, expressed
LOC_Os02g15540	magenta	0.617288	99.185	33.599	65.586	-31.987	0.617288	0.280858	expressed protein
LOC_Os12g41720	magenta	0.776936	188.05	60.6708	127.379	-66.7083	0.776936	0.677065	PLA IIIA/PLP7, putative, expressed
LOC_Os10g28120	magenta	0.768314	263.933	68.9412	194.991	-126.05	0.768314	0.414423	glycosyl hydrolase, putative, expressed
LOC_Os05g14180	magenta	0.727733	244.171	52.9586	191.213	-138.254	0.727733	0.662327	OsIAA17 - Auxin-responsive Aux/IAA gene family member, expressed
LOC_Os01g71830	magenta	0.832716	167.076	87.3213	79.7551	7.56621	0.832716	0.510612	glycosyl hydrolases family 17, putative, expressed
LOC_Os01g41170	magenta	0.645525	370.516	45.5444	324.972	-279.427	0.645525	0.617998	THION27 - Plant thionin family protein precursor, expressed
LOC_Os07g44910	magenta	0.841298	141.05	78.2314	62.8189	15.4124	0.841298	0.499029	gibberellin receptor GID1L2, putative, expressed
LOC_Os05g38940	magenta	0.82327	583.306	101.485	481.822	-380.337	0.82327	0.880631	expressed protein
LOC_Os07g36210	magenta	0.782165	208.017	68.656	139.361	-70.7055	0.782165	0.36513	expressed protein
LOC_Os03g17870	magenta	0.548155	29.8032	10.6457	19.1575	-8.51179	0.548155	0.461953	metallothionein, putative, expressed
LOC_Os07g40630	magenta	0.862981	324.399	111.856	212.543	-100.686	0.862981	0.650951	BRASSINOSTEROID INSENSITIVE 1 precursor, putative, expressed
LOC_Os07g36230	magenta	0.721197	143.677	44.7519	98.9248	-54.1728	0.721197	0.168225	BTBN15 - Bric-a-Brac, Tramtrack, Broad Complex BTB domain with non-phototropic hypocotyl 3 NPH3 and coiled-coil domains, expressed
LOC_Os07g40640	magenta	0.729349	333.507	61.9699	271.537	-209.567	0.729349	0.658811	expressed protein
LOC_Os10g11500	magenta	0.814867	158.227	77.1351	81.0919	-3.95682	0.814867	0.538688	SCP-like extracellular protein, expressed
LOC_Os07g40610	magenta	0.803503	146.741	73.1893	73.5512	-0.361942	0.803503	0.572889	retrotransposon protein, putative, unclassified, expressed
LOC_Os07g09610	magenta	0.883032	177.75	109.241	68.5088	40.7319	0.883032	0.437712	CAMK_KIN1/SNF1/Nim1_like_AMPKh.1 - CAMK includes calcium/calmodulin depedent protein kinases, expressed
LOC_Os09g25390	magenta	0.926532	451.995	169.169	282.825	-113.656	0.926532	0.816773	phospholipase D, putative, expressed
LOC_Os03g60620	magenta	0.732328	187.808	43.506	144.302	-100.796	0.732328	0.512696	DnaK family protein, putative, expressed
LOC_Os08g02909	magenta	0.638556	60.5339	21.3777	39.1562	-17.7784	0.638556	0.377201	expressed protein
LOC_Os05g47700	magenta	0.788631	472.567	85.8006	386.766	-300.965	0.788631	0.834374	LTPL152 - Protease inhibitor/seed storage/LTP family protein precursor, expressed
LOC_Os03g60810	magenta	0.669873	92.9202	30.2223	62.6979	-32.4756	0.669873	0.495333	lectin-like receptor kinase, putative, expressed
LOC_Os05g31040	magenta	0.951747	431.085	189.632	241.453	-51.8204	0.951747	0.793242	cytokinin dehydrogenase precursor, putative, expressed
LOC_Os10g40570	magenta	0.542166	114.147	17.492	96.6555	-79.1635	0.542166	0.0307206	flavin-containing monooxygenase family protein, putative, expressed
LOC_Os04g09900	magenta	0.819718	331.621	103.659	227.962	-124.303	0.819718	0.759383	ent-kaurene synthase, chloroplast precursor, putative, expressed
LOC_Os04g09920	magenta	0.843243	348.132	114.083	234.049	-119.966	0.843243	0.754353	cytochrome P450, putative, expressed
LOC_Os01g13120	magenta	0.828306	173.427	89.8196	83.6078	6.21173	0.828306	0.343609	aquaporin protein, putative, expressed
LOC_Os01g13130	magenta	0.918901	294.293	142.809	151.484	-8.67547	0.918901	0.660935	aquaporin protein, putative, expressed
LOC_Os11g23770	magenta	0.851704	215.375	104.279	111.096	-6.81679	0.851704	0.686323	cysteine protease, putative, expressed
LOC_Os08g08430	magenta	0.78442	220.357	62.0649	158.292	-96.2271	0.78442	0.679369	expressed protein
LOC_Os04g05330	magenta	0.524167	37.808	8.06655	29.7415	-21.6749	0.524167	0.523029	retrotransposon protein, putative, unclassified, expressed
LOC_Os03g17660	magenta	0.722285	167.347	58.2089	109.138	-50.9293	0.722285	0.485345	expressed protein
LOC_Os06g35960	magenta	0.589462	75.9528	16.2735	59.6793	-43.4058	0.589462	0.382912	HSF-type DNA-binding domain containing protein, expressed
LOC_Os04g09830	magenta	0.751934	110.774	41.1088	69.6655	-28.5567	0.751934	0.615552	retrotransposon protein, putative, unclassified, expressed
LOC_Os10g11370	magenta	0.626641	67.83	23.4252	44.4048	-20.9796	0.626641	0.181532	LTPL87 - Protease inhibitor/seed storage/LTP family protein precursor, putative, expressed
LOC_Os04g09810	magenta	0.570512	46.9347	10.4148	36.5198	-26.105	0.570512	0.452945	riboflavin biosynthesis protein ribD, putative, expressed
LOC_Os10g40934	magenta	0.480551	34.3365	5.13678	29.1997	-24.0629	0.480551	0.231309	flavonol synthase/flavanone 3-hydroxylase, putative, expressed
LOC_Os08g37930	magenta	0.916416	295.113	148.374	146.739	1.63446	0.916416	0.722334	beta-expansin precursor, putative, expressed
LOC_Os01g18870	magenta	0.781558	129.455	72.3687	57.0861	15.2826	0.781558	0.406327	helix-loop-helix DNA-binding domain containing protein, expressed
LOC_Os04g05470	magenta	0.757603	193.285	72.4121	120.873	-48.4607	0.757603	0.683158	protein kinase, putative, expressed
LOC_Os01g53100	magenta	0.576262	29.5785	11.142	18.4365	-7.29445	0.576262	0.317499	ubiquitin family protein, putative, expressed
LOC_Os02g38230	magenta	0.761591	200.209	58.9833	141.226	-82.2427	0.761591	0.538822	high affinity nitrate transporter, putative, expressed
LOC_Os05g01530	magenta	0.771097	151.798	63.8378	87.9605	-24.1227	0.771097	0.478119	expressed protein
LOC_Os02g38290	magenta	0.80572	151.422	75.6018	75.8206	-0.218786	0.80572	0.608386	cytochrome P450, putative, expressed
LOC_Os08g37874	magenta	0.680875	76.6243	26.813	49.8113	-22.9983	0.680875	0.365257	2-nitropropane dioxygenase family, putative, expressed
LOC_Os10g40830	magenta	0.835216	338.142	108.485	229.657	-121.172	0.835216	0.66423	metalloendoproteinase 1 precursor, putative, expressed
LOC_Os09g31360	magenta	0.614377	86.2923	24.2599	62.0324	-37.7725	0.614377	0.407374	expressed protein
LOC_Os03g25440	magenta	0.654917	82.0236	26.9432	55.0804	-28.1372	0.654917	0.228279	expressed protein
LOC_Os03g58940	magenta	0.938576	346.155	173.64	172.515	1.12451	0.938576	0.740559	LTPL83 - Protease inhibitor/seed storage/LTP family protein precursor, putative, expressed
LOC_Os03g05030	magenta	0.784113	260.004	79.3488	180.655	-101.306	0.784113	0.660228	dirigent, putative, expressed
LOC_Os03g25490	magenta	0.778144	126.13	58.5773	67.5527	-8.97544	0.778144	0.384749	cytochrome P450 72A1, putative, expressed
LOC_Os03g25470	magenta	0.737897	104.092	47.168	56.9242	-9.75621	0.737897	0.430753	ctr copper transporter family protein, putative, expressed
LOC_Os01g18450	magenta	0.771318	129.31	62.9247	66.3857	-3.46101	0.771318	0.398522	expressed protein
LOC_Os11g11780	magenta	0.593915	55.9901	13.2499	42.7401	-29.4902	0.593915	0.60996	cysteine-rich receptor-like protein kinase 21 precursor, putative, expressed
LOC_Os07g36770	magenta	0.601974	34.9228	14.6456	20.2772	-5.63159	0.601974	0.366123	retrotransposon protein, putative, Ty3-gypsy subclass, expressed
LOC_Os11g39230	magenta	0.69866	106.394	34.6214	71.7722	-37.1507	0.69866	0.472952	retrotransposon protein, putative, unclassified, expressed
LOC_Os11g39260	magenta	0.647939	52.0113	20.8854	31.1259	-10.2405	0.647939	0.428639	NBS-LRR disease resistance protein, putative, expressed
LOC_Os10g05660	magenta	0.893935	369.182	143.154	226.028	-82.8736	0.893935	0.719663	thaumatin, putative, expressed
LOC_Os06g23220	magenta	0.604685	54.0495	11.1968	42.8528	-31.656	0.604685	0.437244	GRF zinc finger family protein, expressed
LOC_Os09g20940	magenta	0.669483	60.9779	23.2622	37.7157	-14.4534	0.669483	0.476561	expressed protein
LOC_Os12g41124	magenta	0.909624	436.932	150.027	286.905	-136.878	0.909624	0.786332	expressed protein
LOC_Os03g21060	magenta	0.878283	661.501	140.339	521.163	-380.824	0.878283	0.842885	No apical meristem protein, putative, expressed
LOC_Os05g31490	magenta	0.684386	111.334	27.3973	83.9368	-56.5395	0.684386	0.440718	golgi transport complex protein-related, putative, expressed
LOC_Os12g41180	magenta	0.880325	201.857	114.66	87.1971	27.4631	0.880325	0.560521	LSTK-1-like kinase, putative, expressed
LOC_Os10g11889	magenta	0.670521	114.571	33.2567	81.3147	-48.058	0.670521	0.582881	expressed protein
LOC_Os03g58750	magenta	0.767751	161.964	62.637	99.3267	-36.6897	0.767751	0.544517	protein kinase domain containing protein, expressed
LOC_Os06g43860	magenta	0.714126	112.45	32.3067	80.1429	-47.8362	0.714126	0.313065	homeobox protein knotted-1, putative, expressed
LOC_Os03g60090	magenta	0.724621	107.121	41.4517	65.6697	-24.218	0.724621	0.351289	methylenetetrahydrofolate reductase, putative, expressed
LOC_Os05g38690	magenta	0.726857	129.346	55.3769	73.9693	-18.5924	0.726857	0.287194	expressed protein
LOC_Os05g47650	magenta	0.7488	92.6067	46.3692	46.2375	0.131655	0.7488	0.483443	B3 DNA binding domain containing protein, expressed
LOC_Os01g49320	magenta	0.521794	32.0691	5.90435	26.1647	-20.2604	0.521794	0.47748	glycosyl hydrolase, putative, expressed
LOC_Os08g37500	magenta	0.789396	141.746	73.8423	67.904	5.93833	0.789396	0.564764	expressed protein
LOC_Os05g01250	magenta	0.677776	100.689	30.4359	70.2532	-39.8173	0.677776	0.246703	SNF7 domain containing protein, putative, expressed
LOC_Os08g37580	magenta	0.90274	245.227	133.41	111.817	21.5933	0.90274	0.419188	homeobox associated leucine zipper, putative, expressed
LOC_Os07g36570	magenta	0.796359	528.39	96.2625	432.128	-335.865	0.796359	0.757085	KI domain interacting kinase 1, putative, expressed
LOC_Os07g44860	magenta	0.713785	61.5528	31.2878	30.2649	1.0229	0.713785	0.39434	gibberellin receptor GID1L2, putative, expressed
LOC_Os04g14690	magenta	0.546488	108.14	26.9639	81.1757	-54.2118	0.546488	0.440341	flavin-containing monooxygenase family protein, putative, expressed
LOC_Os09g31050	magenta	0.649023	49.0295	17.4674	31.5621	-14.0947	0.649023	0.319915	cytosolic phospholipase A2 beta, putative, expressed
LOC_Os04g44924	magenta	0.895203	514.11	162.165	351.945	-189.78	0.895203	0.804813	short-chain dehydrogenase/reductase, putative, expressed
LOC_Os07g40290	magenta	0.944782	428.634	181.492	247.142	-65.6494	0.944782	0.7922	OsGH3.8 - Probable indole-3-acetic acid-amido synthetase, expressed
LOC_Os07g48900	magenta	0.8041	176.397	67.9196	108.478	-40.5581	0.8041	0.545797	expressed protein
LOC_Os10g35060	magenta	0.731758	167.465	44.2073	123.258	-79.0504	0.731758	0.425765	Ser/Thr protein phosphatase family protein, putative, expressed
LOC_Os05g34320	magenta	0.529228	40.3525	8.52566	31.8268	-23.3011	0.529228	0.403371	beta-hexosaminidase precursor, putative, expressed
LOC_Os08g37432	magenta	0.848569	212.465	101.788	110.677	-8.88901	0.848569	0.315348	MATE efflux family protein, putative, expressed
LOC_Os06g04080	magenta	0.945981	421.172	182.506	238.666	-56.1606	0.945981	0.76184	glycosyl hydrolases family 17, putative, expressed
LOC_Os03g58580	magenta	0.806862	238.872	83.6564	155.216	-71.5592	0.806862	0.445832	nodulin, putative, expressed
LOC_Os01g45110	magenta	0.880325	247.102	131.784	115.318	16.4664	0.880325	0.54383	anthocyanin 3-O-beta-glucosyltransferase, putative, expressed
LOC_Os01g06520	magenta	0.647706	131.574	27.7176	103.856	-76.1389	0.647706	0.638625	verticillium wilt disease resistance protein, putative, expressed
LOC_Os04g55850	magenta	0.830403	376.573	106.796	269.777	-162.981	0.830403	0.81165	nuclease PA3, putative, expressed
LOC_Os10g41060	magenta	0.862996	265.226	115.495	149.731	-34.236	0.862996	0.720567	expressed protein
LOC_Os03g58350	magenta	0.877588	399.531	122.192	277.339	-155.147	0.877588	0.688839	OsIAA14 - Auxin-responsive Aux/IAA gene family member, expressed
LOC_Os05g39200	magenta	0.69428	55.1186	24.8198	30.2987	-5.47889	0.69428	0.365597	expressed protein
LOC_Os03g58390	magenta	0.711915	82.5982	37.0205	45.5777	-8.55714	0.711915	0.38622	zinc finger, C3HC4 type domain containing protein, expressed
LOC_Os05g06670	magenta	0.961243	391.509	195.664	195.845	-0.181736	0.961243	0.714209	gibberellin 2-oxidase, putative, expressed
LOC_Os07g44130	magenta	0.748543	157.916	53.5497	104.367	-50.8171	0.748543	0.666964	cytochrome P450 72A1, putative, expressed
LOC_Os02g02210	magenta	0.883269	400.49	134.519	265.97	-131.451	0.883269	0.841458	aminotransferase, putative, expressed
LOC_Os02g02230	magenta	0.796272	193.925	73.1477	120.777	-47.6292	0.796272	0.667802	cytochrome P450, putative, expressed
LOC_Os01g38359	magenta	0.74882	78.2478	38.3536	39.8942	-1.54063	0.74882	0.504074	peptidyl-prolyl cis-trans isomerase, FKBP-type, putative, expressed
LOC_Os03g30950	magenta	0.777296	223.344	72.8309	150.513	-77.6824	0.777296	0.461511	acyl-desaturase, chloroplast precursor, putative, expressed
LOC_Os03g58410	magenta	0.70471	168.637	32.6907	135.946	-103.255	0.70471	0.649162	prenylated rab acceptor, putative, expressed
LOC_Os04g02030	magenta	0.856241	178.696	92.7994	85.897	6.90233	0.856241	0.610814	rp1, putative, expressed
LOC_Os01g52830	magenta	0.823091	183.702	78.7695	104.933	-26.1632	0.823091	0.478727	DUF1264 domain containing protein, putative, expressed
LOC_Os01g52810	magenta	0.513047	58.6634	8.02882	50.6345	-42.6057	0.513047	0.471963	expressed protein
LOC_Os02g02340	magenta	0.646092	319.334	45.5676	273.766	-228.199	0.646092	0.696662	glycerol-3-phosphate acyltransferase, putative, expressed
LOC_Os05g06610	magenta	0.687479	82.1022	35.108	46.9942	-11.8862	0.687479	0.377289	retrotransposon protein, putative, unclassified, expressed
LOC_Os08g26870	magenta	0.580573	69.5869	19.5047	50.0822	-30.5775	0.580573	0.434678	wound responsive protein, putative, expressed
LOC_Os08g02030	magenta	0.692007	167.44	49.3098	118.13	-68.8206	0.692007	0.111781	transferase family protein, putative, expressed
LOC_Os06g12630	magenta	0.620866	60.1591	17.4931	42.6661	-25.173	0.620866	0.419025	glutathione S-transferase, N-terminal domain containing protein, expressed
LOC_Os10g39680	magenta	0.890227	424.586	131.384	293.202	-161.818	0.890227	0.80382	CHIT14 - Chitinase family protein precursor, expressed
LOC_Os10g41250	magenta	0.858169	228.448	109.522	118.926	-9.40344	0.858169	0.627402	glycoprotein, putative, expressed
LOC_Os04g55610	magenta	0.592709	43.9935	15.1451	28.8483	-13.7032	0.592709	0.496898	expressed protein
LOC_Os02g02010	magenta	0.874082	269.563	118.172	151.391	-33.2194	0.874082	0.592369	expressed protein
LOC_Os09g31430	magenta	0.723335	107.801	47.7847	60.0165	-12.2318	0.723335	0.348013	Os9bglu30 - beta-glucosidase, similar to Os4bglu12 exoglucanase, expressed
LOC_Os06g24730	magenta	0.846884	168.241	87.254	80.9865	6.26745	0.846884	0.417089	hydrolase, alpha/beta fold family domain containing protein, expressed
LOC_Os08g37115	magenta	0.72004	136.587	42.8301	93.7568	-50.9267	0.72004	0.462454	expressed protein
LOC_Os04g55710	magenta	0.83924	192.241	95.1803	97.0608	-1.88049	0.83924	0.490705	transposon protein, putative, unclassified, expressed
LOC_Os04g55740	magenta	0.5408	32.3966	7.91995	24.4766	-16.5567	0.5408	0.51333	peroxidase precursor, putative, expressed
LOC_Os03g21380	magenta	0.724254	160.996	51.8018	109.195	-57.393	0.724254	0.50854	OsCML27 - Calmodulin-related calcium sensor protein, expressed
LOC_Os05g50920	magenta	0.871811	332.3	132.791	199.508	-66.717	0.871811	0.648358	transmembrane amino acid transporter protein, putative, expressed
LOC_Os12g06870	magenta	0.73989	454.288	53.982	400.306	-346.324	0.73989	0.729638	OsNucAP2 - Putative Nucleoporin Autopeptidase homologue, expressed
LOC_Os01g38610	magenta	0.638948	69.6509	20.0111	49.6398	-29.6287	0.638948	0.482042	helix-loop-helix DNA-binding domain containing protein, expressed
LOC_Os01g45510	magenta	0.924058	299.974	156.791	143.183	13.6082	0.924058	0.536874	DUF617 domain containing protein, expressed
LOC_Os12g22810	magenta	0.657623	66.2006	21.1931	45.0074	-23.8143	0.657623	0.365899	transposon protein, putative, CACTA, En/Spm sub-class, expressed
LOC_Os05g43870	magenta	0.683708	121.55	33.1322	88.4181	-55.286	0.683708	0.52083	myosin heavy chain-related, putative, expressed
LOC_Os02g06830	magenta	0.757732	114.012	47.7091	66.3029	-18.5938	0.757732	0.328854	expressed protein
LOC_Os12g06060	magenta	0.716793	235.274	56.6238	178.65	-122.026	0.716793	0.649776	amino acid permease family protein, putative, expressed
LOC_Os03g21999	magenta	0.665297	72.2449	22.9019	49.3431	-26.4412	0.665297	0.473453	expressed protein
LOC_Os03g21960	magenta	0.570913	123.774	16.1614	107.613	-91.4512	0.570913	0.322733	aminotransferase, putative, expressed
LOC_Os08g03700	magenta	0.715932	105.825	46.4626	59.3623	-12.8997	0.715932	0.408131	glycerol-3-phosphate acyltransferase, putative, expressed
LOC_Os05g43910	magenta	0.748953	135.087	49.3328	85.7543	-36.4215	0.748953	0.580591	cytochrome P450, putative, expressed
LOC_Os10g41400	magenta	0.719546	356.043	56.1317	299.911	-243.779	0.719546	0.649813	peptide methionine sulfoxide reductase, putative, expressed
LOC_Os09g20240	magenta	0.862988	334.477	113.578	220.899	-107.321	0.862988	0.830892	DUF581 domain containing protein, expressed
LOC_Os02g10030	magenta	0.667499	55.3447	19.358	35.9867	-16.6287	0.667499	0.378369	expressed protein
LOC_Os02g06960	magenta	0.73521	72.3398	35.5616	36.7782	-1.21657	0.73521	0.474269	expressed protein
LOC_Os02g41860	magenta	0.966764	341.168	200.759	140.409	60.35	0.966764	0.655879	aquaporin protein, putative, expressed
LOC_Os02g06950	magenta	0.71744	82.9842	33.1751	49.809	-16.6339	0.71744	0.60152	no apical meristem protein, putative, expressed
LOC_Os06g12210	magenta	0.711223	133.694	41.5113	92.1823	-50.671	0.711223	0.205191	helix-loop-helix DNA-binding domain containing protein, expressed
LOC_Os07g37130	magenta	0.674382	78.8476	30.4511	48.3965	-17.9453	0.674382	0.257493	FUR1, putative, expressed
LOC_Os02g33560	magenta	0.807264	645.755	92.5849	553.17	-460.585	0.807264	0.881551	expressed protein
LOC_Os08g19650	magenta	0.634325	102.011	30.8974	71.1134	-40.216	0.634325	0.628502	homeobox protein knotted-1, putative, expressed
LOC_Os12g06190	magenta	0.632075	49.8763	15.6809	34.1954	-18.5146	0.632075	0.41545	expressed protein
LOC_Os12g06180	magenta	0.74887	186.819	52.9765	133.842	-80.8656	0.74887	0.583914	HVA22, putative, expressed
LOC_Os02g19820	magenta	0.760121	119.393	55.5374	63.8558	-8.31844	0.760121	0.365903	nodulin MtN3 family protein, putative, expressed
LOC_Os01g06740	magenta	0.724956	222.19	45.5321	176.658	-131.126	0.724956	0.613477	ribosome inactivating protein, putative, expressed
LOC_Os06g48720	magenta	0.72495	93.6048	43.4915	50.1133	-6.62171	0.72495	0.20621	cadmium/zinc-transporting ATPase 4, putative, expressed
LOC_Os09g24330	magenta	0.472415	35.3152	6.91923	28.396	-21.4767	0.472415	0.414097	TKL_IRAK_DUF26-lg.2 - DUF26 kinases have homology to DUF26 containing loci, expressed
LOC_Os09g24350	magenta	0.819939	306.563	105.79	200.773	-94.9835	0.819939	0.602286	THION32 - Plant thionin family protein precursor, expressed
LOC_Os02g10350	magenta	0.760127	266.161	82.7094	183.452	-100.743	0.760127	0.668611	MLO domain containing protein, putative, expressed
LOC_Os02g19924	magenta	0.548302	52.2475	11.4094	40.8381	-29.4287	0.548302	0.0658012	aminotransferase, classes I and II, domain containing protein, expressed
LOC_Os01g38110	magenta	0.697041	161.973	43.0766	118.896	-75.8195	0.697041	0.64629	cytochrome P450, putative, expressed
LOC_Os06g30640	magenta	0.957181	314.685	180.924	133.761	47.163	0.957181	0.682484	cytochrome P450, putative, expressed
LOC_Os03g16700	magenta	0.620805	311.342	27.9953	283.346	-255.351	0.620805	0.695493	initiator-binding protein, putative, expressed
LOC_Os06g12060	magenta	0.583319	48.8457	10.0672	38.7786	-28.7114	0.583319	0.259266	mTERF family protein, expressed
LOC_Os01g45624	magenta	0.668643	72.4703	22.7082	49.7621	-27.054	0.668643	0.585861	oleosin, putative, expressed
LOC_Os06g12040	magenta	0.66621	86.1703	30.1493	56.021	-25.8717	0.66621	0.481986	mTERF family protein, expressed
LOC_Os03g30200	magenta	0.697662	135.544	27.1244	108.42	-81.2953	0.697662	0.402199	mitochondrial import inner membrane translocase subunit Tim17, putative, expressed
LOC_Os05g39170	magenta	0.625239	48.3658	19.2089	29.1569	-9.94793	0.625239	0.562886	expressed protein
LOC_Os03g21820	magenta	0.837659	364.369	113.904	250.465	-136.562	0.837659	0.750086	expansin precursor, putative, expressed
LOC_Os11g32170	magenta	0.857528	423.049	116.492	306.557	-190.065	0.857528	0.822412	stripe rust resistance protein Yr10, putative, expressed
LOC_Os08g02690	magenta	0.486066	27.506	7.19817	20.3078	-13.1097	0.486066	0.203847	MA3 domain containing protein, expressed
LOC_Os03g60960	magenta	0.908085	388.571	147.721	240.85	-93.1291	0.908085	0.764987	cytokinin-N-glucosyltransferase 1, putative, expressed
LOC_Os02g33850	magenta	0.588767	57.8591	11.2695	46.5896	-35.3202	0.588767	0.34069	elongation factor Tu family protein, putative, expressed
LOC_Os10g41749	magenta	0.753554	141.385	46.7679	94.6176	-47.8497	0.753554	0.518918	crcB-like protein, expressed
LOC_Os06g39120	magenta	0.554335	23.9884	9.12626	14.8621	-5.73583	0.554335	0.345563	expressed protein
LOC_Os01g69220	magenta	0.522778	37.8928	9.11747	28.7753	-19.6578	0.522778	0.371272	exostosin family domain containing protein, expressed
LOC_Os06g09260	magenta	0.626987	58.3373	15.4821	42.8552	-27.373	0.626987	0.497289	expressed protein
LOC_Os11g02159	magenta	0.770702	110.023	50.0004	60.0221	-10.0217	0.770702	0.526617	expressed protein
LOC_Os04g33490	magenta	0.934121	279.482	155.063	124.419	30.6432	0.934121	0.631797	neutral/alkaline invertase, putative, expressed
LOC_Os01g40499	magenta	0.717123	130.057	45.4153	84.6414	-39.2261	0.717123	0.569351	S-locus lectin protein kinase family protein, putative, expressed
LOC_Os06g44240	magenta	0.747294	175.495	40.7587	134.736	-93.9777	0.747294	0.574792	gp176, putative, expressed
LOC_Os01g40580	magenta	0.578727	45.4265	10.7997	34.6268	-23.827	0.578727	0.549173	hypersensitive-induced response protein, putative, expressed
LOC_Os01g57599	magenta	0.744026	212.894	55.7309	157.163	-101.432	0.744026	0.649993	retrotransposon protein, putative, unclassified, expressed
LOC_Os01g69200	magenta	0.852876	227.92	104.084	123.836	-19.7519	0.852876	0.593334	regulatory protein, putative, expressed
LOC_Os06g24180	magenta	0.596235	37.7574	12.5524	25.205	-12.6526	0.596235	0.183521	cytochrome P450 84A1, putative, expressed
LOC_Os12g01890	magenta	0.657159	56.0381	24.6751	31.3629	-6.68776	0.657159	0.267527	SAG20, putative, expressed
LOC_Os09g32100	magenta	0.83308	471.91	111.158	360.752	-249.594	0.83308	0.765098	expressed protein
LOC_Os09g29540	magenta	0.804562	111.173	63.415	47.7584	15.6567	0.804562	0.427946	OsWAK82 - OsWAK receptor-like cytoplasmic kinase OsWAK-RLCK, expressed
LOC_Os09g29560	magenta	0.702612	54.6928	26.3862	28.3067	-1.92046	0.702612	0.53994	OsWAK83 - OsWAK pseudogene, expressed
LOC_Os10g04730	magenta	0.77167	161.035	57.9466	103.089	-45.1421	0.77167	0.475195	TKL_IRAK_DUF26-la.6 - DUF26 kinases have homology to DUF26 containing loci, expressed
LOC_Os04g10010	magenta	0.697845	243.876	48.138	195.738	-147.6	0.697845	0.697629	sex determination protein tasselseed-2, putative, expressed
LOC_Os04g10060	magenta	0.877509	337.345	129.975	207.37	-77.3958	0.877509	0.799639	ent-kaurene synthase, chloroplast precursor, putative, expressed
LOC_Os04g33590	magenta	0.765095	92.6004	45.2562	47.3442	-2.08802	0.765095	0.391918	hydrolase, alpha/beta fold family protein, putative, expressed
LOC_Os07g49120	magenta	0.929068	486.172	171.151	315.021	-143.87	0.929068	0.799461	sex determination protein tasselseed-2, putative, expressed
LOC_Os09g32230	magenta	0.797773	513.288	97.1433	416.145	-319.001	0.797773	0.735135	vignain precursor, putative, expressed
LOC_Os04g49550	magenta	0.841621	362.734	108.156	254.578	-146.422	0.841621	0.703282	RING-H2 finger protein ATL2A, putative, expressed
LOC_Os03g04920	magenta	0.762539	156.344	62.4125	93.9319	-31.5194	0.762539	0.320571	multidrug resistance-associated protein, putative, expressed
LOC_Os02g02820	magenta	0.653944	218.495	38.6218	179.873	-141.251	0.653944	0.676016	helix-loop-helix DNA-binding domain containing protein, expressed
LOC_Os04g10160	magenta	0.857344	272.733	114.851	157.882	-43.0314	0.857344	0.686703	cytochrome P450, putative, expressed
LOC_Os02g19530	magenta	0.72101	155.804	52.942	102.862	-49.9202	0.72101	0.554861	lectin-like receptor kinase, putative, expressed
LOC_Os03g46570	magenta	0.909478	439.33	149.466	289.864	-140.399	0.909478	0.803404	protein binding protein, putative, expressed
LOC_Os05g27050	magenta	0.852664	180.413	98.4928	81.92	16.5728	0.852664	0.610475	peptide transporter, putative, expressed
LOC_Os04g45020	magenta	0.723266	156.866	41.0877	115.778	-74.6905	0.723266	0.73397	MYB family transcription factor, putative, expressed
LOC_Os08g33710	magenta	0.787362	249.751	68.5242	181.227	-112.703	0.787362	0.435964	ribonuclease T2 family domain containing protein, expressed
LOC_Os09g36360	magenta	0.534752	29.4801	8.24525	21.2348	-12.9896	0.534752	0.110466	protein of unknown function containing protein, expressed
LOC_Os05g27010	magenta	0.920964	307.052	149.362	157.69	-8.32805	0.920964	0.761114	peptide transporter PTR3-A, putative, expressed
LOC_Os04g33600	magenta	0.880795	276.241	121.148	155.092	-33.9436	0.880795	0.598221	hydrolase, alpha/beta fold family protein, putative, expressed
LOC_Os07g49080	magenta	0.625983	55.0734	16.1825	38.8909	-22.7083	0.625983	0.35755	COBRA-like protein 7 precursor, putative, expressed
LOC_Os02g52410	magenta	0.754071	103.987	50.0001	53.9871	-3.98693	0.754071	0.508388	expressed protein
LOC_Os06g09310	magenta	0.910466	467.27	165.091	302.179	-137.088	0.910466	0.825041	zinc finger, C3HC4 type domain containing protein, expressed
LOC_Os09g29710	magenta	0.877026	442.377	136.013	306.364	-170.351	0.877026	0.799216	beta-expansin precursor, putative, expressed
LOC_Os02g52480	magenta	0.660385	76.5839	28.4718	48.1121	-19.6402	0.660385	0.328192	cyclin-dependent kinase inhibitor, putative, expressed
LOC_Os05g18850	magenta	0.590588	91.7048	13.6224	78.0824	-64.46	0.590588	0.529905	endoribonuclease Dicer, putative, expressed
LOC_Os12g26290	magenta	0.680417	107.514	32.3928	75.121	-42.7282	0.680417	0.712559	alpha-DOX2, putative, expressed
LOC_Os04g45140	magenta	0.845078	479.119	110.302	368.817	-258.515	0.845078	0.786198	DTA2, putative, expressed
LOC_Os03g04710	magenta	0.636221	90.0595	24.2347	65.8248	-41.5901	0.636221	0.537947	expressed protein
LOC_Os06g39110	magenta	0.561498	32.4801	10.2315	22.2486	-12.017	0.561498	0.28209	expressed protein
LOC_Os09g36200	magenta	0.943853	403.346	175.549	227.797	-52.2475	0.943853	0.822492	senescence-inducible chloroplast stay-green protein 1, putative, expressed
LOC_Os01g57610	magenta	0.768674	261.387	67.7924	193.594	-125.802	0.768674	0.462724	OsGH3.1 - Probable indole-3-acetic acid-amido synthetase, expressed
LOC_Os06g09688	magenta	0.428699	16.1329	2.43521	13.6977	-11.2625	0.428699	0.224429	chaperonin, putative, expressed
LOC_Os10g27980	magenta	0.747548	100.921	44.9605	55.9608	-11.0003	0.747548	0.475535	transmembrane amino acid transporter protein, putative, expressed
LOC_Os11g35040	magenta	0.843676	385.026	102.774	282.252	-179.478	0.843676	0.721757	aminotransferase, classes I and II, domain containing protein, expressed
LOC_Os06g09660	magenta	0.671743	91.5543	32.2773	59.277	-26.9997	0.671743	0.199996	auxin response factor, putative, expressed
LOC_Os09g29200	magenta	0.799013	237.033	81.5265	155.507	-73.9802	0.799013	0.600225	glutathione S-transferase, putative, expressed
LOC_Os09g32510	magenta	0.772589	148.659	74.733	73.9261	0.806882	0.772589	0.398923	BHLH transcription factor, putative, expressed
LOC_Os04g51172	magenta	0.969302	341.101	197.413	143.688	53.7257	0.969302	0.677264	Disease resistance/zinc finger/chromosome condensation-like region protein, putative, expressed
LOC_Os09g32550	magenta	0.718359	129.52	47.8644	81.6555	-33.7912	0.718359	0.600365	glucan endo-1,3-beta-glucosidase precursor, putative, expressed
LOC_Os01g01840	magenta	0.913542	271.418	137.576	133.841	3.73487	0.913542	0.676477	helix-loop-helix DNA-binding domain containing protein, expressed
LOC_Os02g57060	magenta	0.733632	102.071	50.2666	51.8043	-1.53774	0.733632	0.267146	OsCttP2 - Putative C-terminal processing peptidase homologue, expressed
LOC_Os03g38240	magenta	0.627701	43.4555	16.9594	26.4961	-9.53671	0.627701	0.475212	expressed protein
LOC_Os11g06020	magenta	0.711438	135.259	54.3441	80.9146	-26.5704	0.711438	0.443167	homeobox domain containing protein, expressed
LOC_Os09g32640	magenta	0.469793	58.4338	13.759	44.6747	-30.9157	0.469793	0.251539	dehydrogenase, putative, expressed
LOC_Os09g29120	magenta	0.729185	102.547	35.9798	66.567	-30.5872	0.729185	0.713693	GRAM domain containing protein, expressed
LOC_Os06g39750	magenta	0.840845	232.209	84.7294	147.479	-62.75	0.840845	0.661658	3-ketoacyl-CoA synthase, putative, expressed
LOC_Os01g65110	magenta	0.921551	358.251	162.458	195.793	-33.3357	0.921551	0.673709	POT family protein, expressed
LOC_Os01g65100	magenta	0.729248	219.635	55.0758	164.559	-109.483	0.729248	0.412456	peptide transporter, putative, expressed
LOC_Os09g36820	magenta	0.733785	155.788	42.5024	113.285	-70.7829	0.733785	0.566251	MCM10 - Putative minichromosome maintenance MCM protein 10, expressed
LOC_Os03g38350	magenta	0.74533	340.151	66.8924	273.259	-206.366	0.74533	0.648506	expressed protein
LOC_Os01g71090	magenta	0.921326	366.296	156.081	210.215	-54.1338	0.921326	0.685341	xylanase inhibitor, putative, expressed
LOC_Os05g06970	magenta	0.825792	167.842	79.0841	88.7578	-9.67369	0.825792	0.423029	peroxidase precursor, putative, expressed
LOC_Os01g71080	magenta	0.737977	166.669	60.7491	105.92	-45.1705	0.737977	0.507748	xylanase inhibitor, putative, expressed
LOC_Os02g52700	magenta	0.950334	403.752	188.192	215.56	-27.3674	0.950334	0.791029	alpha-amylase precursor, putative, expressed
LOC_Os06g09900	magenta	0.828292	158.642	82.0352	76.6065	5.42875	0.828292	0.498957	expressed protein
LOC_Os09g29490	magenta	0.852101	283.156	121.831	161.325	-39.4942	0.852101	0.697584	peroxidase precursor, putative, expressed
LOC_Os09g29480	magenta	0.841656	206.449	90.2034	116.246	-26.0424	0.841656	0.602108	2-aminoethanethiol dioxygenase, putative, expressed
LOC_Os02g45460	magenta	0.675595	289.751	45.9155	243.835	-197.92	0.675595	0.569717	expressed protein
LOC_Os08g33300	magenta	0.937917	496.605	186.05	310.556	-124.506	0.937917	0.809007	cytochrome P450 72A1, putative, expressed
LOC_Os09g36700	magenta	0.868866	306.682	126.229	180.453	-54.2247	0.868866	0.588878	ribonuclease T2 family domain containing protein, expressed
LOC_Os04g38026	magenta	0.92283	464.882	163.68	301.202	-137.521	0.92283	0.767922	transporter family protein, putative, expressed
LOC_Os06g24420	magenta	0.780526	109.831	52.9447	56.8858	-3.94115	0.780526	0.440249	transposon protein, putative, CACTA, En/Spm sub-class, expressed
LOC_Os06g48020	magenta	0.911163	261.042	144.845	116.197	28.6476	0.911163	0.552813	peroxidase precursor, putative, expressed
LOC_Os04g55380	magenta	0.864001	261.257	119.374	141.883	-22.5088	0.864001	0.586754	expressed protein
LOC_Os12g01370	magenta	0.683101	87.9727	35.3838	52.5889	-17.205	0.683101	0.244551	fatty acid desaturase, putative, expressed
LOC_Os06g12810	magenta	0.614844	99.2599	24.0399	75.22	-51.1801	0.614844	0.487493	proteins of unknown function domain containing protein, expressed
LOC_Os02g52870	magenta	0.89133	292.261	129.819	162.442	-32.6235	0.89133	0.798925	zinc finger, C3HC4 type domain containing protein, expressed
LOC_Os01g65030	magenta	0.682812	80.2293	24.836	55.3933	-30.5573	0.682812	0.412196	S-locus-specific glycoprotein precursor, putative, expressed
LOC_Os07g24090	magenta	0.711167	72.666	27.276	45.39	-18.114	0.711167	0.397548	mTERF domain containing protein, expressed
LOC_Os05g43110	magenta	0.486828	26.359	8.57613	17.7829	-9.20675	0.486828	0.410224	GDSL-like lipase/acylhydrolase, putative, expressed
LOC_Os02g30100	magenta	0.960013	454.842	201.27	253.572	-52.3026	0.960013	0.79477	cytochrome P450, putative, expressed
LOC_Os02g30110	magenta	0.872585	222.864	110.157	112.707	-2.55046	0.872585	0.715835	cytochrome P450, putative, expressed
LOC_Os05g23560	magenta	0.734349	125.168	45.3606	79.8077	-34.4471	0.734349	0.687067	expressed protein
LOC_Os03g08490	magenta	0.699396	142.749	44.7433	98.0053	-53.262	0.699396	0.402165	AP2 domain containing protein, expressed
LOC_Os01g12740	magenta	0.826201	314.529	96.7014	217.828	-121.126	0.826201	0.704263	cytochrome P450, putative, expressed
LOC_Os12g34056	magenta	0.572987	46.0814	8.86265	37.2187	-28.3561	0.572987	0.21542	mitochondrial 60S ribosomal protein L16, putative, expressed
LOC_Os07g35540	magenta	0.772153	146.16	51.4957	94.6638	-43.1681	0.772153	0.573013	TKL_IRAK_DUF26-lc.19 - DUF26 kinases have homology to DUF26 containing loci, expressed
LOC_Os12g03530	magenta	0.676568	102.949	30.2765	72.6726	-42.3961	0.676568	0.487855	alpha-N-arabinofuranosidase, putative, expressed
LOC_Os04g29810	magenta	0.702069	83.8538	38.9929	44.8609	-5.86804	0.702069	0.371359	expressed protein
LOC_Os10g27260	magenta	0.553089	34.0975	8.72623	25.3713	-16.6451	0.553089	0.529624	transposon protein, putative, CACTA, En/Spm sub-class, expressed
LOC_Os04g45860	magenta	0.659285	124.493	36.7732	87.7202	-50.9469	0.659285	0.0806867	transposon protein, putative, unclassified, expressed
LOC_Os06g01250	magenta	0.822295	185.321	88.0579	97.2629	-9.20507	0.822295	0.442716	cytochrome P450, putative, expressed
LOC_Os07g31460	magenta	0.527545	83.3861	15.0408	68.3453	-53.3045	0.527545	0.0607073	peptide-Nasparagine amidase, putative, expressed
LOC_Os01g72710	magenta	0.724338	297.34	41.1113	256.229	-215.117	0.724338	0.648885	expressed protein
LOC_Os05g35266	magenta	0.728021	394.162	65.5675	328.595	-263.027	0.728021	0.654947	galactosyltransferase, putative, expressed
LOC_Os01g72740	magenta	0.950752	388.818	194.112	194.707	-0.595	0.950752	0.74835	cytochrome P450, putative, expressed
LOC_Os03g40540	magenta	0.701857	141.496	45.1255	96.3705	-51.2449	0.701857	0.254781	cytochrome P450, putative, expressed
LOC_Os03g04020	magenta	0.882279	283.43	121.477	161.953	-40.4756	0.882279	0.511733	expansin precursor, putative, expressed
LOC_Os05g27930	magenta	0.563966	83.2217	15.7314	67.4903	-51.759	0.563966	0.209837	AP2 domain containing protein, expressed
LOC_Os03g14630	magenta	0.870187	465.653	135.638	330.015	-194.377	0.870187	0.797141	LTPL106 - Protease inhibitor/seed storage/LTP family protein precursor, expressed
LOC_Os10g02880	magenta	0.854859	156.501	97.6064	58.8949	38.7116	0.854859	0.466459	O-methyltransferase, putative, expressed
LOC_Os04g45834	magenta	0.751849	78.3169	41.6536	36.6633	4.99029	0.751849	0.552314	DUF584 domain containing protein, putative, expressed
LOC_Os03g10240	magenta	0.866085	355.07	110.786	244.284	-133.498	0.866085	0.792627	DUF677 domain containing protein, putative, expressed
LOC_Os07g31190	magenta	0.643826	59.5285	19.2533	40.2751	-21.0218	0.643826	0.477669	OsWAK71 - OsWAK receptor-like cytoplasmic kinase OsWAK-RLCK, expressed
LOC_Os05g30400	magenta	0.834447	157.134	88.399	68.7348	19.6642	0.834447	0.478528	expressed protein
LOC_Os01g28500	magenta	0.882526	356.617	136.902	219.716	-82.8139	0.882526	0.804609	SCP-like extracellular protein, expressed
LOC_Os09g38239	magenta	0.627593	51.5961	15.6228	35.9733	-20.3505	0.627593	0.333359	sulfotransferase domain containing protein, expressed
LOC_Os03g04130	magenta	0.835629	299.492	100.592	198.899	-98.3067	0.835629	0.590483	AMP-binding domain containing protein, expressed
LOC_Os07g35790	magenta	0.723843	254.764	49.656	205.108	-155.452	0.723843	0.58397	TKL_IRAK_DUF26-ld.5 - DUF26 kinases have homology to DUF26 containing loci, expressed
LOC_Os10g34020	magenta	0.881528	316.695	128.329	188.366	-60.0378	0.881528	0.831605	glutathione S-transferase, putative, expressed
LOC_Os04g21160	magenta	0.852247	185.479	99.9141	85.565	14.3491	0.852247	0.610083	triacylglycerol lipase 1 precursor, putative, expressed
LOC_Os09g38390	magenta	0.642745	98.0667	32.6232	65.4434	-32.8202	0.642745	0.471982	octicosapeptide/Phox/Bem1p, putative, expressed
LOC_Os07g47480	magenta	0.821228	477.475	93.5514	383.924	-290.372	0.821228	0.836159	heavy metal-associated domain containing protein, expressed
LOC_Os04g21110	magenta	0.670112	190.411	36.4279	153.983	-117.555	0.670112	0.644272	phosphoribulokinase/Uridine kinase family protein, expressed
LOC_Os03g14950	magenta	0.628034	141.797	29.0838	112.714	-83.6298	0.628034	0.335436	PLA IIIA/PLP7, putative, expressed
LOC_Os07g04450	magenta	0.799185	734.765	101.606	633.159	-531.553	0.799185	0.795679	expressed protein
LOC_Os11g18194	magenta	0.805138	185.596	79.7138	105.883	-26.1687	0.805138	0.475809	cycloartenol synthase, putative, expressed
LOC_Os04g50216	magenta	0.736146	157.825	50.8716	106.953	-56.0818	0.736146	0.388507	SNARE associated Golgi protein, putative, expressed
LOC_Os05g27790	magenta	0.717639	356.633	61.2044	295.429	-234.224	0.717639	0.59102	membrane associated DUF588 domain containing protein, putative, expressed
LOC_Os03g10440	magenta	0.840119	669.056	123.858	545.198	-421.34	0.840119	0.850923	glycosyl hydrolase family 10 protein, putative, expressed
LOC_Os01g12680	magenta	0.913277	258.573	147.304	111.269	36.0354	0.913277	0.476937	C4-dicarboxylate transporter/malic acid transport protein, expressed
LOC_Os09g38410	magenta	0.695061	216.674	45.676	170.998	-125.322	0.695061	0.562153	sialin, putative, expressed
LOC_Os01g48820	magenta	0.397106	50.811	7.26017	43.5509	-36.2907	0.397106	0.0502595	expressed protein
LOC_Os12g03110	magenta	0.799037	388.846	85.291	303.555	-218.264	0.799037	0.678675	ZF-HD protein dimerisation region containing protein, expressed
LOC_Os12g03150	magenta	0.767724	112.133	57.339	54.7937	2.54528	0.767724	0.364478	myb-like DNA-binding domain containing protein, putative, expressed
LOC_Os12g38320	magenta	0.720272	89.117	34.5937	54.5233	-19.9297	0.720272	0.487357	expressed protein
LOC_Os11g14130	magenta	0.747732	160.202	49.1606	111.041	-61.8808	0.747732	0.396807	mTERF family protein, expressed
LOC_Os04g37760	magenta	0.918374	416.364	159.199	257.165	-97.9667	0.918374	0.702014	expressed protein
LOC_Os12g38300	magenta	0.795731	290.382	94.0588	196.323	-102.265	0.795731	0.703046	metallothionein, putative, expressed
LOC_Os01g24720	magenta	0.543101	38.6889	8.86755	29.8214	-20.9538	0.543101	0.437315	expressed protein
LOC_Os01g12440	magenta	0.682573	93.6488	30.179	63.4698	-33.2908	0.682573	0.367733	AP2 domain containing protein, expressed
LOC_Os04g37660	magenta	0.659751	144.838	32.6308	112.207	-79.5762	0.659751	0.543718	protein phosphotase protein, putative, expressed
LOC_Os04g37670	magenta	0.608543	74.975	22.0349	52.9401	-30.9051	0.608543	0.0891431	steroid nuclear receptor, ligand-binding, putative, expressed
LOC_Os01g48710	magenta	0.80046	155.687	75.762	79.9255	-4.16348	0.80046	0.42735	heavy metal-associated domain containing protein, expressed
LOC_Os06g01660	magenta	0.643829	149.026	33.4151	115.611	-82.1956	0.643829	0.103967	integral membrane protein DUF6 domain containing protein, expressed
LOC_Os04g33240	magenta	0.661139	86.8376	26.3989	60.4387	-34.0397	0.661139	0.563613	sex determination protein tasselseed-2, putative, expressed
LOC_Os04g33070	magenta	0.848725	237.787	115.211	122.576	-7.36555	0.848725	0.529439	expressed protein
LOC_Os08g09060	magenta	0.852143	166.902	93.9738	72.9286	21.0452	0.852143	0.520277	Cupin domain containing protein, expressed
LOC_Os10g02480	magenta	0.837579	157.123	86.7521	70.3707	16.3815	0.837579	0.57728	oxidoreductase, aldo/keto reductase family protein, putative, expressed
LOC_Os09g02180	magenta	0.896858	296.997	140.002	156.994	-16.9917	0.896858	0.563829	expressed protein
LOC_Os04g33080	magenta	0.625907	156.47	24.5561	131.914	-107.357	0.625907	0.636839	protein phosphatase 2C, putative, expressed
LOC_Os02g30714	magenta	0.583929	80.8974	15.7847	65.1127	-49.328	0.583929	0.537446	dehydrogenase/reductase, putative, expressed
LOC_Os08g09010	magenta	0.868734	232.429	117.103	115.326	1.77722	0.868734	0.429564	Cupin domain containing protein, expressed
LOC_Os08g09000	magenta	0.785841	142.591	65.1782	77.4126	-12.2343	0.785841	0.489249	Cupin domain containing protein, expressed
LOC_Os09g02120	magenta	0.645687	45.661	19.3088	26.3522	-7.04332	0.645687	0.445684	expressed protein
LOC_Os03g10050	magenta	0.54035	81.6615	21.0136	60.6479	-39.6343	0.54035	0.434295	serine acetyltransferase protein, putative, expressed
LOC_Os03g10100	magenta	0.748629	86.1518	46.3478	39.804	6.54381	0.748629	0.420604	transporter family protein, putative, expressed
LOC_Os01g48610	magenta	0.710814	106.285	42.479	63.8064	-21.3274	0.710814	0.564262	expressed protein
LOC_Os06g01960	magenta	0.82948	240.573	91.0838	149.489	-58.4056	0.82948	0.379876	retrotransposon protein, putative, unclassified, expressed
LOC_Os12g03370	magenta	0.861419	539.049	124.509	414.541	-290.032	0.861419	0.780592	harpin-induced protein 1 domain containing protein, expressed
LOC_Os04g45690	magenta	0.581118	75.7243	20.0907	55.6337	-35.543	0.581118	0.319716	B-box zinc finger family protein, putative, expressed
LOC_Os02g14180	magenta	0.8318	186.307	86.5019	99.8054	-13.3035	0.8318	0.536901	peroxidase precursor, putative, expressed
LOC_Os01g48540	magenta	0.484861	12.5396	3.68586	8.85374	-5.16787	0.484861	0.403576	glyoxal oxidase-related, putative, expressed
LOC_Os09g38772	magenta	0.872346	208.842	124.298	84.5449	39.7527	0.872346	0.507471	MOSC domain-containing protein, mitochondrial precursor, putative, expressed
LOC_Os06g01800	magenta	0.560512	45.3893	8.20377	37.1855	-28.9817	0.560512	0.225147	expressed protein
LOC_Os01g40030	magenta	0.712689	92.7696	43.9977	48.7719	-4.77418	0.712689	0.411302	expressed protein
LOC_Os03g16390	magenta	0.868266	366.05	122.793	243.257	-120.464	0.868266	0.808898	avr9/Cf-9 rapidly elicited protein, putative, expressed
LOC_Os04g01470	magenta	0.886338	494.107	143.247	350.86	-207.613	0.886338	0.878224	O-methyltransferase, putative, expressed
LOC_Os02g35190	magenta	0.731571	107.979	45.8811	62.0976	-16.2165	0.731571	0.384433	chloride channel protein, putative, expressed
LOC_Os02g35180	magenta	0.916575	243.503	143.575	99.9279	43.6474	0.916575	0.476152	OsRR2 type-A response regulator, expressed
LOC_Os02g55330	magenta	0.516092	56.0786	8.77331	47.3053	-38.532	0.516092	0.344974	OsPOP6 - Putative Prolyl Oligopeptidase homologue, expressed
LOC_Os11g32480	magenta	0.739491	135.468	47.2267	88.2415	-41.0148	0.739491	0.587125	TPR repeat region family protein, expressed
LOC_Os02g10860	magenta	0.668941	64.8408	25.943	38.8978	-12.9549	0.668941	0.382891	bZIP transcription factor domain containing protein, expressed
LOC_Os04g01590	magenta	0.634645	73.5134	24.536	48.9774	-24.4414	0.634645	0.198759	arginase, putative, expressed
LOC_Os07g43900	magenta	0.815595	184.188	71.8699	112.318	-40.4484	0.815595	0.58031	protein kinase domain containing protein, expressed
LOC_Os01g63854	magenta	0.916962	262.912	146.738	116.174	30.5639	0.916962	0.472676	transmembrane amino acid transporter protein, putative, expressed
LOC_Os02g39570	magenta	0.797367	179.147	82.659	96.4878	-13.8288	0.797367	0.525525	ACT domain containing protein, expressed
LOC_Os11g10300	magenta	0.732332	169.216	37.222	131.994	-94.772	0.732332	0.58983	OsFBX415 - F-box domain containing protein, expressed
LOC_Os04g01690	magenta	0.725004	138.52	59.5773	78.9432	-19.3659	0.725004	0.219862	pyridoxal-dependent decarboxylase protein, putative, expressed
LOC_Os07g43670	magenta	0.685859	99.354	29.5335	69.8204	-40.2869	0.685859	0.556522	ribonuclease T2 family domain containing protein, expressed
LOC_Os04g29210	magenta	0.651647	96.4802	30.2316	66.2485	-36.0169	0.651647	0.564933	FAD-binding and arabino-lactone oxidase domains containing protein, putative, expressed
LOC_Os08g01530	magenta	0.71837	109.241	46.1862	63.0546	-16.8684	0.71837	0.468004	expressed protein
LOC_Os05g46510	magenta	0.79516	155.173	71.2121	83.9605	-12.7484	0.79516	0.437299	polygalacturonase, putative, expressed
LOC_Os02g39490	magenta	0.78381	618.473	79.6986	538.774	-459.076	0.78381	0.731297	carbonyl reductase 3, putative, expressed
LOC_Os09g26840	magenta	0.636106	153.655	38.7694	114.886	-76.1162	0.636106	0.233071	expressed protein
LOC_Os06g13070	magenta	0.544306	25.8856	6.5334	19.3522	-12.8188	0.544306	0.260027	hhH-GPD superfamily base excision DNA repair protein, putative, expressed
LOC_Os06g13040	magenta	0.639884	51.4417	16.8158	34.6259	-17.8101	0.639884	0.380147	glycosyl hydrolases family 16, putative, expressed
LOC_Os11g32210	magenta	0.72666	117.098	47.5658	69.5325	-21.9667	0.72666	0.568017	jacalin-like lectin domain containing protein, expressed
LOC_Os01g52100	magenta	0.926469	362.617	163.253	199.364	-36.1115	0.926469	0.788754	DUF581 domain containing protein, expressed
LOC_Os08g29650	magenta	0.581451	60.3299	13.8979	46.432	-32.5341	0.581451	0.203434	RNA recognition motif containing protein, expressed
LOC_Os07g47590	magenta	0.874669	424.616	131.2	293.415	-162.215	0.874669	0.803674	expressed protein
LOC_Os07g08460	magenta	0.952611	328.616	175.347	153.269	22.0778	0.952611	0.689131	OsIAA24 - Auxin-responsive Aux/IAA gene family member, expressed
LOC_Os05g46395	magenta	0.757633	102.302	46.2365	56.0657	-9.82914	0.757633	0.494384	expressed protein
LOC_Os05g35594	magenta	0.907615	315.685	142.279	173.407	-31.128	0.907615	0.569854	peptide transporter, putative, expressed
LOC_Os01g48040	magenta	0.607037	64.9757	14.8296	50.1461	-35.3164	0.607037	0.441455	S-locus-like receptor protein kinase, putative, expressed
LOC_Os12g42120	magenta	0.448162	37.7916	4.802	32.9896	-28.1876	0.448162	0.348482	PPR repeat containing protein, expressed
LOC_Os10g39100	magenta	0.884447	344.139	130.718	213.42	-82.702	0.884447	0.743766	uncharacterized Cys-rich domain containing protein, putative, expressed
LOC_Os05g35570	magenta	0.682692	109.661	43.4017	66.2594	-22.8577	0.682692	0.521733	DUF803 domain containing, putative, expressed
LOC_Os10g06760	magenta	0.761763	131.327	63.4529	67.8745	-4.42161	0.761763	0.405938	receptor-like protein kinase precursor, putative, expressed
LOC_Os02g39910	magenta	0.860523	434.016	117.075	316.941	-199.866	0.860523	0.739551	B4-BTB1 - Bric-a-Brac, Tramtrack, Broad Complex BTB domain with B4 subfamily conserved sequence, expressed
LOC_Os01g60780	magenta	0.525526	26.2217	6.49749	19.7242	-13.2267	0.525526	0.52789	solute carrier family 35 member E3, putative, expressed
LOC_Os11g38160	magenta	0.657407	118.954	25.841	93.1127	-67.2717	0.657407	0.678657	transporter family protein, putative, expressed
LOC_Os03g26650	magenta	0.921863	530.077	171.915	358.163	-186.248	0.921863	0.839539	heavy metal-associated domain containing protein, expressed
LOC_Os07g08390	magenta	0.905207	395.017	145.672	249.345	-103.672	0.905207	0.715846	plant-specific domain TIGR01615 family protein, expressed
LOC_Os07g47670	magenta	0.834518	184.146	92.0822	92.0637	0.0185178	0.834518	0.31814	hypoxia-responsive family protein, putative, expressed
LOC_Os01g60700	magenta	0.842784	159.53	86.6796	72.8504	13.8292	0.842784	0.48973	serine/threonine-protein kinase NAK, putative, expressed
LOC_Os05g35650	magenta	0.579565	160.887	21.3258	139.561	-118.235	0.579565	0.315715	peptide transporter PTR2, putative, expressed
LOC_Os03g61490	magenta	0.62142	125.282	24.3109	100.971	-76.6603	0.62142	0.626502	expressed protein
LOC_Os10g39260	magenta	0.689294	136.064	42.3565	93.7072	-51.3507	0.689294	0.514077	aspartic proteinase nepenthesin, putative, expressed
LOC_Os11g38070	magenta	0.53268	61.2598	8.80758	52.4522	-43.6446	0.53268	0.384541	expressed protein
LOC_Os06g22030	magenta	0.694735	383.341	38.1816	345.16	-306.978	0.694735	0.763726	AT hook motif domain containing protein, expressed
LOC_Os07g04150	magenta	0.870919	243.565	104.326	139.24	-34.9141	0.870919	0.739325	stress-induced protein, putative, expressed
LOC_Os06g40818	magenta	0.855863	214.937	104.594	110.343	-5.7485	0.855863	0.416055	aspartic proteinase, putative, expressed
LOC_Os10g14920	magenta	0.708788	636.598	60.3514	576.247	-515.896	0.708788	0.800659	integral membrane protein DUF6 containing protein, expressed
LOC_Os05g39800	magenta	0.873478	306.57	121.484	185.087	-63.6031	0.873478	0.621613	NFD4, putative, expressed
LOC_Os07g35370	magenta	0.706871	108.011	40.6928	67.3186	-26.6258	0.706871	0.575276	TKL_IRAK_DUF26-lc.15 - DUF26 kinases have homology to DUF26 containing loci, expressed
LOC_Os07g35380	magenta	0.790089	185.176	69.0694	116.106	-47.037	0.790089	0.605559	TKL_IRAK_DUF26-lc.16 - DUF26 kinases have homology to DUF26 containing loci, expressed
LOC_Os07g35390	magenta	0.643821	52.687	23.0369	29.6501	-6.61316	0.643821	0.549736	TKL_IRAK_DUF26-lc.17 - DUF26 kinases have homology to DUF26 containing loci, expressed
LOC_Os02g42330	magenta	0.770586	126.354	60.973	65.3815	-4.40854	0.770586	0.343226	nitrilase, putative, expressed
LOC_Os02g03230	magenta	0.652526	112.841	26.8844	85.9564	-59.072	0.652526	0.261994	membrane related protein CP5, putative, expressed
LOC_Os03g22490	magenta	0.91504	276.97	141.817	135.154	6.66308	0.91504	0.51884	heavy metal-associated domain containing protein, expressed
LOC_Os06g34400	magenta	0.805813	334.767	94.0611	240.706	-146.645	0.805813	0.692022	zinc finger, C3HC4 type domain containing protein, expressed
LOC_Os08g01880	magenta	0.748751	179.635	59.654	119.981	-60.3268	0.748751	0.399512	synaptobrevin-related family protein, putative, expressed
LOC_Os07g04040	magenta	0.774486	151.117	55.8308	95.2867	-39.4559	0.774486	0.314735	expressed protein
LOC_Os01g09280	magenta	0.743082	739.683	72.9677	666.716	-593.748	0.743082	0.7897	myb-related transcription activator, putative, expressed
LOC_Os11g32650	magenta	0.737064	177.604	60.3748	117.23	-56.8547	0.737064	0.52827	chalcone synthase, putative, expressed
LOC_Os03g22390	magenta	0.78039	112.658	57.9301	54.7284	3.20166	0.78039	0.464056	universal stress protein domain containing protein, putative, expressed
LOC_Os09g21660	magenta	0.58878	83.7323	11.1262	72.6061	-61.4799	0.58878	0.487494	expressed protein
LOC_Os07g43070	magenta	0.634805	83.6307	32.3194	51.3113	-18.9918	0.634805	0.458063	expressed protein
LOC_Os11g38640	magenta	0.880279	448.553	121.695	326.859	-205.164	0.880279	0.696987	expressed protein
LOC_Os11g38650	magenta	0.764102	288.689	65.2717	223.417	-158.146	0.764102	0.741573	UDP-glucoronosyl/UDP-glucosyl transferase, putative, expressed
LOC_Os03g22600	magenta	0.687404	74.6952	26.1227	48.5725	-22.4497	0.687404	0.607346	BTBN6 - Bric-a-Brac, Tramtrack, Broad Complex BTB domain with non-phototropic hypocotyl 3 NPH3 and coiled-coil domains, expressed
LOC_Os03g22650	magenta	0.706616	67.6175	30.2271	37.3904	-7.16324	0.706616	0.417077	expressed protein
LOC_Os09g13890	magenta	0.771758	208.491	66.1055	142.386	-76.2802	0.771758	0.187716	calmodulin binding protein, putative, expressed
LOC_Os03g22680	magenta	0.532711	51.9464	11.5684	40.3779	-28.8095	0.532711	0.0206192	RING finger and CHY zinc finger domain-containing protein 1, putative, expressed
LOC_Os11g40570	magenta	0.746196	298.186	64.9105	233.276	-168.365	0.746196	0.642174	plant viral response family protein, putative, expressed
LOC_Os01g51320	magenta	0.654618	109.579	22.7627	86.8162	-64.0535	0.654618	0.663558	peroxisomal N-acetyl-spermine/spermidine oxidase precursor, putative, expressed
LOC_Os02g51910	magenta	0.868217	209.948	105.357	104.591	0.76549	0.868217	0.463702	cytokinin-O-glucosyltransferase 2, putative, expressed
LOC_Os03g49150	magenta	0.81497	199.042	78.7156	120.327	-41.6109	0.81497	0.59053	yippee zinc-binding protein, putative, expressed
LOC_Os02g51900	magenta	0.817444	134.224	69.6969	64.5269	5.17003	0.817444	0.421844	cytokinin-O-glucosyltransferase 2, putative, expressed
LOC_Os11g38780	magenta	0.73037	108.616	43.3293	65.2867	-21.9573	0.73037	0.471755	EF hand family protein, putative
LOC_Os01g68650	magenta	0.614916	57.8453	15.7812	42.0641	-26.2828	0.614916	0.352797	plant-specific domain TIGR01615 family protein, expressed
LOC_Os07g08970	magenta	0.608132	73.6493	20.1667	53.4826	-33.3159	0.608132	0.526305	uncharacterized protein ycf45, putative, expressed
LOC_Os03g49190	magenta	0.704665	54.5708	26.6791	27.8917	-1.21263	0.704665	0.34352	oleosin, putative, expressed
LOC_Os02g34710	magenta	0.928226	572.74	177.333	395.407	-218.074	0.928226	0.868734	expressed protein
LOC_Os01g60230	magenta	0.873715	293.812	121.435	172.376	-50.941	0.873715	0.645775	auxin efflux carrier component, putative, expressed
LOC_Os02g34700	magenta	0.558214	55.6731	19.3493	36.3238	-16.9746	0.558214	0.274248	expressed protein
LOC_Os03g22790	magenta	0.784507	201.015	72.8562	128.158	-55.3022	0.784507	0.443104	beta-amylase, putative, expressed
LOC_Os03g57050	magenta	0.604612	65.6988	14.9739	50.7249	-35.751	0.604612	0.587198	expressed protein
LOC_Os08g38510	magenta	0.475745	12.0804	3.10424	8.97614	-5.8719	0.475745	0.195124	expressed protein
LOC_Os12g07810	magenta	0.677582	90.1984	34.533	55.6654	-21.1324	0.677582	0.255887	aldehyde dehydrogenase, putative, expressed
LOC_Os02g34560	magenta	0.929519	278.457	156.339	122.118	34.2205	0.929519	0.682495	plant neutral invertase domain containing protein, expressed
LOC_Os08g25440	magenta	0.733752	89.9273	41.0557	48.8716	-7.81597	0.733752	0.510356	expressed protein
LOC_Os05g12640	magenta	0.781178	117.393	57.4356	59.9571	-2.52148	0.781178	0.573859	BURP domain containing protein, expressed
LOC_Os08g08960	magenta	0.721912	133.386	40.9455	92.4406	-51.4951	0.721912	0.738949	Cupin domain containing protein, expressed
LOC_Os08g40740	magenta	0.679991	66.2322	30.2743	35.9579	-5.68361	0.679991	0.424623	glycosyl hydrolase, putative, expressed
LOC_Os02g18930	magenta	0.746297	116.181	49.7791	66.4019	-16.6228	0.746297	0.438188	calcineurin B, putative, expressed
LOC_Os04g54630	magenta	0.602665	80.1248	27.3626	52.7622	-25.3995	0.602665	0.432951	expressed protein
LOC_Os08g04540	magenta	0.548454	42.3888	10.8074	31.5814	-20.7741	0.548454	0.56209	decarboxylase, putative, expressed
LOC_Os08g04560	magenta	0.826645	222.128	97.2798	124.848	-27.5679	0.826645	0.454307	decarboxylase, putative, expressed
LOC_Os02g11640	magenta	0.917655	347.465	168.222	179.244	-11.022	0.917655	0.687283	UDP-glucoronosyl and UDP-glucosyl transferase, putative, expressed
LOC_Os02g11680	magenta	0.597984	30.4179	11.2419	19.176	-7.93414	0.597984	0.405252	glucosyltransferase, putative, expressed
LOC_Os06g13200	magenta	0.808262	187.069	74.134	112.935	-38.8008	0.808262	0.576704	proton-dependent oligopeptide transport, putative, expressed
LOC_Os11g44590	magenta	0.472278	29.9636	9.00045	20.9631	-11.9627	0.472278	0.229689	retrotransposon protein, putative, Ty3-gypsy subclass, expressed
LOC_Os03g37930	magenta	0.825711	252.903	99.9191	152.984	-53.0652	0.825711	0.653276	potassium transporter, putative, expressed
LOC_Os03g37840	magenta	0.737087	126.022	53.5048	72.5175	-19.0127	0.737087	0.520238	potassium transporter, putative, expressed
LOC_Os01g09930	magenta	0.716699	108.037	44.2191	63.8179	-19.5988	0.716699	0.38443	helix-loop-helix DNA-binding domain containing protein, expressed
LOC_Os10g40360	magenta	0.843942	441.243	114.034	327.208	-213.174	0.843942	0.862323	proline oxidase, mitochondrial precursor, putative, expressed
LOC_Os10g38860	magenta	0.473698	35.8853	5.19817	30.6871	-25.489	0.473698	0.319308	hydrolase, alpha/beta fold family domain containing protein, expressed
LOC_Os09g21380	magenta	0.72345	80.469	35.2318	45.2371	-10.0053	0.72345	0.430172	expressed protein
LOC_Os07g29290	magenta	0.754992	185.735	61.6313	124.104	-62.4723	0.754992	0.257987	expansin precursor, putative, expressed
LOC_Os09g25620	magenta	0.493274	60.814	10.1387	50.6753	-40.5366	0.493274	0.4409	CPuORF8 - conserved peptide uORF-containing transcript, expressed
LOC_Os09g25625	magenta	0.441756	52.2703	7.32479	44.9455	-37.6207	0.441756	0.34205	S-adenosyl-l-methionine decarboxylase leader peptide, putative, expressed
LOC_Os02g03870	magenta	0.770191	139.439	55.941	83.4984	-27.5574	0.770191	0.395256	periplasmic beta-glucosidase precursor, putative, expressed
LOC_Os10g40490	magenta	0.555646	26.6397	8.69734	17.9424	-9.24507	0.555646	0.43129	U-box domain containing protein, expressed
LOC_Os10g38710	magenta	0.622724	37.5931	13.5481	24.0449	-10.4968	0.622724	0.296855	glutathione S-transferase, putative, expressed
LOC_Os02g34990	magenta	0.830856	347.571	102.212	245.359	-143.148	0.830856	0.726664	ACT domain containing protein, putative, expressed
LOC_Os01g51210	magenta	0.743672	128.781	52.9833	75.7978	-22.8145	0.743672	0.223647	uncharacterized protein PA4923, putative, expressed
LOC_Os03g15780	magenta	0.68987	374.639	38.4445	336.194	-297.75	0.68987	0.718099	anthranilate synthase component I-1, chloroplast precursor, putative, expressed
LOC_Os01g60190	magenta	0.706548	117.279	50.5455	66.7334	-16.1879	0.706548	0.516129	2,3-bisphosphoglycerate-independent phosphoglycerate mutase, putative, expressed
LOC_Os01g60170	magenta	0.833195	575.343	102.397	472.946	-370.549	0.833195	0.84541	DUF567 domain containing protein, putative, expressed
LOC_Os11g33120	magenta	0.940967	426.959	181.294	245.664	-64.37	0.940967	0.793597	respiratory burst oxidase, putative, expressed
LOC_Os01g60120	magenta	0.782534	118.176	59.5957	58.5807	1.015	0.782534	0.346116	transmembrane protein 56, putative, expressed
LOC_Os03g15680	magenta	0.595624	37.6611	14.0909	23.5702	-9.47927	0.595624	0.187487	nodulation-signaling pathway 2 protein, putative, expressed
LOC_Os03g27280	magenta	0.893959	505.676	147.978	357.698	-209.72	0.893959	0.807256	CAMK_CAMK_like.19 - CAMK includes calcium/calmodulin depedent protein kinases, expressed
LOC_Os01g09990	magenta	0.566767	51.6258	14.5685	37.0573	-22.4888	0.566767	0.397458	helix-loop-helix DNA-binding domain containing protein, expressed
LOC_Os03g54100	magenta	0.693181	72.6046	26.9296	45.6751	-18.7455	0.693181	0.6543	potassium channel protein, putative, expressed
LOC_Os01g56500	magenta	0.711634	105.942	34.2241	71.7179	-37.4937	0.711634	0.562947	expressed protein
LOC_Os03g54130	magenta	0.794552	227.501	85.8681	141.633	-55.765	0.794552	0.708487	cysteine protease 1 precursor, putative, expressed
LOC_Os09g25850	magenta	0.787826	169.806	76.7291	93.0773	-16.3481	0.787826	0.478232	WAX2, putative, expressed
LOC_Os01g60020	magenta	0.856053	279.961	106.456	173.505	-67.0498	0.856053	0.42485	NAC domain transcription factor, putative, expressed
LOC_Os03g54050	magenta	0.939963	334.302	166.956	167.346	-0.390001	0.939963	0.639898	anther-specific proline-rich protein APG precursor, putative, expressed
LOC_Os08g04910	magenta	0.90768	282.952	147.861	135.09	12.771	0.90768	0.587477	expressed protein
LOC_Os07g23730	magenta	0.853895	552.215	128.722	423.494	-294.772	0.853895	0.772855	thaumatin, putative, expressed
LOC_Os08g01150	magenta	0.890466	556.804	147.69	409.115	-261.425	0.890466	0.780758	DTA2, putative, expressed
LOC_Os09g25810	magenta	0.899219	473.279	150.037	323.242	-173.204	0.899219	0.812505	nodulin, putative, expressed
LOC_Os08g01120	magenta	0.770921	252.916	69.0231	183.893	-114.87	0.770921	0.584135	sulfate transporter, putative, expressed
LOC_Os10g38960	magenta	0.854815	179.515	98.6373	80.8781	17.7592	0.854815	0.592016	lectin-like receptor kinase, putative, expressed
LOC_Os01g29240	magenta	0.84376	249.831	100.1	149.731	-49.6309	0.84376	0.777989	expressed protein
LOC_Os02g51000	magenta	0.656051	81.2877	23.0526	58.2351	-35.1825	0.656051	0.191273	CS domain containing protein, putative, expressed
LOC_Os01g29280	magenta	0.935397	321.064	165.91	155.154	10.7563	0.935397	0.774694	expressed protein
LOC_Os03g03500	magenta	0.690062	128.478	43.6256	84.852	-41.2264	0.690062	0.359337	heavy metal-associated domain containing protein, expressed
LOC_Os11g07930	magenta	0.830094	216.244	84.5204	131.723	-47.203	0.830094	0.667985	oxidoreductase, short chain dehydrogenase/reductase family domain containing family, expressed
LOC_Os10g30560	magenta	0.92977	440.58	170.801	269.779	-98.9785	0.92977	0.817964	UDP-glucoronosyl and UDP-glucosyl transferase domain containing protein, expressed
LOC_Os05g42280	magenta	0.642876	84.7886	20.0143	64.7743	-44.76	0.642876	0.407745	expressed protein
LOC_Os01g56390	magenta	0.732612	153.238	55.7143	97.5232	-41.8089	0.732612	0.437869	OsFBX26 - F-box domain containing protein, expressed
LOC_Os02g30910	magenta	0.739049	142.642	48.8767	93.7657	-44.8889	0.739049	0.586003	nodulin MtN3 family protein, putative, expressed
LOC_Os01g29150	magenta	0.868931	294.908	106.435	188.473	-82.0375	0.868931	0.594185	cytochrome P450 72A1, putative, expressed
LOC_Os10g34910	magenta	0.719708	115.083	39.1573	75.9259	-36.7686	0.719708	0.641519	secretory protein, putative, expressed
LOC_Os07g17300	magenta	0.446398	15.4044	2.67759	12.7268	-10.0492	0.446398	0.100418	expressed protein
LOC_Os02g07210	magenta	0.635683	148.324	29.7268	118.597	-88.87	0.635683	0.000553998	OTU-like cysteine protease family protein, putative, expressed
LOC_Os03g03440	magenta	0.730024	250.883	61.416	189.467	-128.051	0.730024	0.616393	expressed protein
LOC_Os06g21760	magenta	0.666153	55.0257	24.2707	30.755	-6.48427	0.666153	0.378858	jasmonate O-methyltransferase, putative, expressed
LOC_Os05g42210	magenta	0.885912	492.467	136.426	356.042	-219.616	0.885912	0.764111	serine/threonine-protein kinase receptor precursor, putative, expressed
LOC_Os10g34960	magenta	0.833155	206.559	85.9353	120.624	-34.6886	0.833155	0.683819	ubiquitin family protein, putative, expressed
LOC_Os03g03490	magenta	0.937321	300.464	159.418	141.047	18.3711	0.937321	0.603185	expressed protein
LOC_Os03g45390	magenta	0.683749	140.403	51.3344	89.0685	-37.7341	0.683749	0.212551	glucan endo-1,3-beta-glucosidase precursor, putative, expressed
LOC_Os11g03440	magenta	0.646858	59.8896	22.1066	37.7831	-15.6765	0.646858	0.493395	myb-like DNA-binding domain containing protein, putative, expressed
LOC_Os11g03420	magenta	0.853394	338.208	112.088	226.12	-114.031	0.853394	0.676806	ZF-HD protein dimerisation region containing protein, expressed
LOC_Os05g42150	magenta	0.82306	434.021	103.604	330.417	-226.814	0.82306	0.78136	OsGH3.4 - Probable indole-3-acetic acid-amido synthetase, expressed
LOC_Os01g72130	magenta	0.882425	387.898	148.978	238.92	-89.9428	0.882425	0.686295	glutathione S-transferase, putative, expressed
LOC_Os01g72120	magenta	0.839082	429.515	110.379	319.136	-208.757	0.839082	0.85036	glutathione S-transferase, putative, expressed
LOC_Os09g37958	magenta	0.608744	94.2416	28.6019	65.6397	-37.0378	0.608744	0.417395	cupin domain containing protein, expressed
LOC_Os06g49850	magenta	0.692589	290.248	52.5742	237.674	-185.1	0.692589	0.687888	expressed protein
LOC_Os09g37967	magenta	0.840931	296.133	95.7962	200.337	-104.541	0.840931	0.739682	cupin domain containing protein, expressed
LOC_Os03g15320	magenta	0.827828	175.12	90.8197	84.3005	6.51919	0.827828	0.525859	glyoxal oxidase-related, putative, expressed
LOC_Os06g49830	magenta	0.822217	132.372	69.7847	62.5876	7.19718	0.822217	0.586283	SHI, putative, expressed
LOC_Os01g35230	magenta	0.742663	114.438	50.1562	64.2819	-14.1257	0.742663	0.367643	1-aminocyclopropane-1-carboxylate oxidase homolog 1, putative, expressed
LOC_Os02g46970	magenta	0.813503	653.747	113.078	540.669	-427.591	0.813503	0.827411	AMP-binding domain containing protein, expressed
LOC_Os12g37260	magenta	0.789686	181.784	73.126	108.658	-35.5321	0.789686	0.488189	lipoxygenase 2.1, chloroplast precursor, putative, expressed
LOC_Os02g46910	magenta	0.892705	374.375	135.84	238.535	-102.695	0.892705	0.629215	glycosyl hydrolases family 16, putative, expressed
LOC_Os03g37320	magenta	0.593392	79.295	16.4179	62.8771	-46.4591	0.593392	0.414486	expressed protein
LOC_Os08g34900	magenta	0.485339	22.0679	6.12563	15.9423	-9.81666	0.485339	0.25124	pectinesterase, putative, expressed
LOC_Os04g46630	magenta	0.960485	390.038	199.965	190.073	9.89127	0.960485	0.711532	expansin precursor, putative, expressed
LOC_Os03g03660	magenta	0.66788	89.3642	30.1164	59.2478	-29.1314	0.66788	0.404312	CAMK_CAMK_like.17 - CAMK includes calcium/calmodulin depedent protein kinases, expressed
LOC_Os03g15270	magenta	0.87226	382.435	145.801	236.634	-90.8333	0.87226	0.736509	gibberellin receptor GID1L2, putative, expressed
LOC_Os11g07430	magenta	0.609585	84.4659	17.7717	66.6942	-48.9226	0.609585	0.243583	proteophosphoglycan ppg1, putative, expressed
LOC_Os11g03240	magenta	0.772756	95.9588	50.9898	44.9691	6.02071	0.772756	0.489635	MATE efflux family protein, putative, expressed
LOC_Os10g26410	magenta	0.52686	26.1696	8.42689	17.7427	-9.31583	0.52686	0.206732	bHLH family protein, putative, expressed
LOC_Os08g04420	magenta	0.685911	98.6072	26.741	71.8661	-45.1251	0.685911	0.440796	tyrosine protein kinase domain containing protein, putative, expressed
LOC_Os11g07450	magenta	0.777239	121.292	46.0786	75.2139	-29.1353	0.777239	0.566845	zinc finger, C3HC4 type domain containing protein, expressed
LOC_Os01g56020	magenta	0.66068	106.159	23.7385	82.4208	-58.6823	0.66068	0.296283	expressed protein
LOC_Os12g02500	magenta	0.842924	225.837	93.5321	132.305	-38.7732	0.842924	0.609819	esterase, putative, expressed
LOC_Os12g02530	magenta	0.887658	305.062	140.352	164.71	-24.3582	0.887658	0.595066	BTBN22 - Bric-a-Brac, Tramtrack, Broad Complex BTB domain with non-phototropic hypocotyl 3 NPH3 and coiled-coil domains, expressed
LOC_Os01g51890	magenta	0.458165	47.4022	6.76093	40.6412	-33.8803	0.458165	0.348631	endonuclease/exonuclease/phosphatase family domain containing protein, expressed
LOC_Os01g68290	magenta	0.620852	61.6801	17.6442	44.0359	-26.3917	0.620852	0.668188	expressed protein
LOC_Os04g54002	magenta	0.769755	87.8858	50.3468	37.539	12.8079	0.769755	0.596247	serine/threonine-protein kinase receptor precursor, putative, expressed
LOC_Os02g46690	magenta	0.807753	227.376	65.7962	161.58	-95.7838	0.807753	0.540543	OsFBD8 - F-box and FBD domain containing protein, expressed
LOC_Os06g38294	magenta	0.865714	342.623	123.848	218.775	-94.9272	0.865714	0.684211	peptide transporter PTR2, putative, expressed
LOC_Os03g45960	magenta	0.781173	218.079	81.1386	136.94	-55.8013	0.781173	0.601607	thaumatin, putative, expressed
LOC_Os02g51670	magenta	0.795957	302.192	78.0969	224.095	-145.998	0.795957	0.768341	ethylene-responsive transcription factor, putative, expressed
LOC_Os01g64000	magenta	0.913428	266.333	138.98	127.352	11.6278	0.913428	0.623827	bZIP transcription factor, putative, expressed
LOC_Os12g27220	magenta	0.885835	273.314	126.363	146.95	-20.5873	0.885835	0.723875	transferase family protein, putative, expressed
LOC_Os08g34380	magenta	0.940609	261.977	160.3	101.677	58.6228	0.940609	0.564803	receptor-like kinase, putative, expressed
LOC_Os10g26540	magenta	0.896536	462.189	150.901	311.288	-160.387	0.896536	0.759198	expressed protein
LOC_Os08g04230	magenta	0.66367	76.5561	26.8774	49.6787	-22.8013	0.66367	0.330556	cysteine-rich repeat secretory protein 55 precursor, putative, expressed
LOC_Os12g37690	magenta	0.788864	318.5	91.2564	227.244	-135.987	0.788864	0.717161	MYB family transcription factor, putative, expressed
LOC_Os01g72420	magenta	0.923943	465.645	172.346	293.299	-120.953	0.923943	0.711064	C2 domain containing protein, putative, expressed
LOC_Os03g08170	magenta	0.831799	260.382	94.0724	166.309	-72.2369	0.831799	0.392139	protein kinase APK1B, chloroplast precursor, putative, expressed
LOC_Os01g12910	magenta	0.84363	202.286	97.1671	105.119	-7.95191	0.84363	0.418097	thioesterase family protein, putative, expressed
LOC_Os08g04130	magenta	0.73846	151.287	64.6288	86.6582	-22.0294	0.73846	0.529973	copine-6, putative, expressed
LOC_Os02g46480	magenta	0.835993	192.979	87.1321	105.846	-18.7144	0.835993	0.513209	expressed protein
LOC_Os06g37590	magenta	0.605533	39.8394	14.805	25.0344	-10.2295	0.605533	0.262669	1-aminocyclopropane-1-carboxylate oxidase protein, putative, expressed
LOC_Os03g62060	magenta	0.532211	48.2783	9.45516	38.8231	-29.368	0.532211	0.431662	hydrolase, putative, expressed
LOC_Os03g19240	magenta	0.834248	324.041	102.507	221.534	-119.026	0.834248	0.703967	AMP-binding enzyme, putative, expressed
LOC_Os09g39940	magenta	0.735114	104.209	47.8696	56.3399	-8.47027	0.735114	0.371711	plastocyanin-like domain containing protein, putative, expressed
LOC_Os08g28970	magenta	0.885006	229.394	120.073	109.32	10.753	0.885006	0.537489	expressed protein
LOC_Os11g25920	magenta	0.820861	205.295	74.5273	130.767	-56.24	0.820861	0.649774	transcription factor-related, putative, expressed
LOC_Os07g30250	magenta	0.843781	231.153	91.2864	139.866	-48.58	0.843781	0.567444	RFT1, putative, expressed
LOC_Os03g62180	magenta	0.706331	179.539	50.4575	129.082	-78.6242	0.706331	0.258048	lectin protein kinase family protein, putative, expressed
LOC_Os04g46940	magenta	0.621178	123.091	26.957	96.1342	-69.1772	0.621178	0.321534	copper-transporting ATPase 3, putative, expressed
LOC_Os08g06010	magenta	0.640896	123.652	25.0221	98.6298	-73.6077	0.640896	0.420751	transporter, major facilitator family, putative, expressed
LOC_Os04g24600	magenta	0.899486	247.971	124.059	123.912	0.147418	0.899486	0.450926	cysteine proteinase 1 precursor, putative, expressed
LOC_Os01g62310	magenta	0.844523	277.555	95.9442	181.611	-85.6663	0.844523	0.720856	homeobox domain containing protein, expressed
LOC_Os08g42630	magenta	0.773637	171.584	70.9523	100.631	-29.679	0.773637	0.411314	expressed protein
LOC_Os05g29990	magenta	0.783136	242.72	65.7055	177.014	-111.309	0.783136	0.708611	NAD dependent epimerase/dehydratase family domain containing protein, expressed
LOC_Os03g56940	magenta	0.819487	705.473	114.045	591.428	-477.384	0.819487	0.821194	app1, putative, expressed
LOC_Os06g37300	magenta	0.820854	445.593	96.9927	348.601	-251.608	0.820854	0.892391	cytochrome P450, putative, expressed
LOC_Os03g07570	magenta	0.457862	63.3894	11.9805	51.4089	-39.4284	0.457862	0.276632	aminotransferase, putative, expressed
LOC_Os09g39770	magenta	0.708817	131.551	48.7608	82.7907	-34.03	0.708817	0.433627	C2 domain containing protein, putative, expressed
LOC_Os03g03034	magenta	0.849545	179.991	99.2074	80.7831	18.4243	0.849545	0.512333	flavonol synthase/flavanone 3-hydroxylase, putative, expressed
LOC_Os11g17954	magenta	0.681526	89.6053	42.5529	47.0525	-4.4996	0.681526	0.38596	transposon protein, putative, Pong sub-class, expressed
LOC_Os11g17930	magenta	0.760509	112.818	51.1929	61.6254	-10.4325	0.760509	0.539042	expressed protein
LOC_Os11g13720	magenta	0.818751	145.733	78.3165	67.4167	10.8998	0.818751	0.358669	expressed protein
LOC_Os11g17970	magenta	0.883624	237.831	132.591	105.24	27.3503	0.883624	0.621494	POT family protein, expressed
LOC_Os07g30690	magenta	0.790416	196.543	75.7564	120.786	-45.03	0.790416	0.455008	indole-3-acetate beta-glucosyltransferase, putative, expressed
LOC_Os10g07229	magenta	0.813398	171.545	85.0357	86.5095	-1.47383	0.813398	0.487041	dehydrogenase, putative, expressed
LOC_Os03g50210	magenta	0.53024	48.602	9.45001	39.1519	-29.7019	0.53024	0.379628	DUF292 domain containing protein, expressed
LOC_Os01g62080	magenta	0.715594	147.356	35.5595	111.796	-76.2368	0.715594	0.501853	serine/threonine-protein kinase AFC1, putative, expressed
LOC_Os07g34730	magenta	0.584574	40.1559	12.1372	28.0187	-15.8814	0.584574	0.364917	acyltransferase, putative, expressed
LOC_Os03g19120	magenta	0.803396	135.413	72.5309	62.8819	9.64893	0.803396	0.417733	MYB family transcription factor, putative, expressed
LOC_Os04g46750	magenta	0.710151	208.603	39.696	168.907	-129.211	0.710151	0.588828	glycosyl transferase 8 domain containing protein, putative, expressed
LOC_Os02g09250	magenta	0.772012	252.388	83.3128	169.075	-85.7626	0.772012	0.662689	cytochrome P450 71D10, putative, expressed
LOC_Os02g09240	magenta	0.842373	284.779	109.809	174.971	-65.1618	0.842373	0.769779	cytochrome P450 71D8, putative, expressed
LOC_Os02g09220	magenta	0.866564	234.51	106.767	127.742	-20.9749	0.866564	0.461681	cytochrome P450, putative, expressed
LOC_Os10g01080	magenta	0.852181	362.27	132.221	230.05	-97.8291	0.852181	0.720701	SOR/SNZ family protein, putative, expressed
LOC_Os05g29974	magenta	0.906807	281.806	136.923	144.883	-7.95909	0.906807	0.518	lipase, putative, expressed
LOC_Os01g62130	magenta	0.958114	412.496	187.535	224.962	-37.4272	0.958114	0.7487	ZOS1-14 - C2H2 zinc finger protein, expressed
LOC_Os08g42020	magenta	0.644409	69.8348	23.1302	46.7046	-23.5744	0.644409	0.157536	zinc ion binding protein, putative, expressed
LOC_Os09g10840	magenta	0.605201	78.0875	23.3735	54.714	-31.3405	0.605201	0.193368	transcription factor, putative, expressed
LOC_Os02g36340	magenta	0.58353	63.9667	18.9106	45.0561	-26.1455	0.58353	0.475757	riboflavin biosynthesis protein ribAB, chloroplast precursor, putative, expressed
LOC_Os10g01660	magenta	0.753654	150.115	45.9364	104.179	-58.2423	0.753654	0.714094	transferase family protein, putative, expressed
LOC_Os11g29210	magenta	0.792409	132.486	67.0832	65.4029	1.68031	0.792409	0.390555	resistance-gene-interacting protein, putative, expressed
LOC_Os03g19680	magenta	0.657167	104.84	33.9434	70.8962	-36.9528	0.657167	0.0364442	enoyl-CoA hydratase/isomerase family protein, putative, expressed
LOC_Os01g27210	magenta	0.840372	223.34	104.426	118.913	-14.487	0.840372	0.715002	glutathione S-transferase, putative, expressed
LOC_Os11g17700	magenta	0.525954	45.1739	10.4462	34.7276	-24.2814	0.525954	0.377052	retrotransposon protein, putative, unclassified, expressed
LOC_Os02g48630	magenta	0.874818	206.636	106.853	99.7833	7.06932	0.874818	0.392266	expressed protein
LOC_Os07g34510	magenta	0.546789	31.0609	5.85268	25.2083	-19.3556	0.546789	0.292234	retrotransposon protein, putative, unclassified, expressed
LOC_Os04g58100	magenta	0.849711	386.713	114.115	272.598	-158.482	0.849711	0.68093	expressed protein
LOC_Os07g34580	magenta	0.744224	150.511	50.3284	100.182	-49.854	0.744224	0.57331	glycosyl hydrolases family 16, putative, expressed
LOC_Os02g36220	magenta	0.87829	355.698	126.572	229.126	-102.554	0.87829	0.830747	terpene synthase, putative, expressed
LOC_Os01g42900	magenta	0.933071	430.02	177.407	252.613	-75.2059	0.933071	0.801449	ABC-2 type transporter domain containing protein, expressed
LOC_Os05g36290	magenta	0.889286	219.208	128.478	90.7302	37.7477	0.889286	0.573693	actin, putative, expressed
LOC_Os02g36280	magenta	0.803458	226.62	89.4521	137.168	-47.7161	0.803458	0.609933	cytochrome P450, putative, expressed
LOC_Os05g36340	magenta	0.692996	58.4767	30.4607	28.016	2.44477	0.692996	0.373877	expressed protein
LOC_Os02g36264	magenta	0.738441	142.419	47.9972	94.422	-46.4249	0.738441	0.679772	terpene synthase, putative, expressed
LOC_Os12g11610	magenta	0.785939	193.994	67.7033	126.29	-58.5871	0.785939	0.644304	expressed protein
LOC_Os02g43300	magenta	0.828684	379.445	108.751	270.694	-161.943	0.828684	0.647391	expressed protein
LOC_Os07g38840	magenta	0.907386	603.223	165.734	437.489	-271.755	0.907386	0.869296	expressed protein
LOC_Os07g42310	magenta	0.571758	53.0362	13.9172	39.119	-25.2018	0.571758	0.326418	lung seven transmembrane domain containing protein, putative, expressed
LOC_Os03g62230	magenta	0.658726	51.9294	25.3378	26.5916	-1.25388	0.658726	0.540553	ZOS3-24 - C2H2 zinc finger protein, expressed
LOC_Os06g33200	magenta	0.69589	632.717	54.1091	578.608	-524.499	0.69589	0.850313	expressed protein
LOC_Os04g53810	magenta	0.662625	93.5901	29.9022	63.6879	-33.7858	0.662625	0.324004	leucoanthocyanidin reductase, putative, expressed
LOC_Os05g15880	magenta	0.827018	149.612	79.6009	70.0108	9.59009	0.827018	0.391532	glycosyl hydrolase, putative, expressed
LOC_Os02g13380	magenta	0.677555	135.407	32.9166	102.49	-69.5734	0.677555	0.223372	early nodulin 93 ENOD93 protein, putative, expressed
LOC_Os03g62200	magenta	0.805949	290.347	88.2717	202.075	-113.803	0.805949	0.618081	ammonium transporter protein, putative, expressed
LOC_Os12g11550	magenta	0.688104	66.2814	25.5117	40.7697	-15.258	0.688104	0.626199	hypothetical protein
LOC_Os06g14200	magenta	0.673852	113.587	25.7077	87.8791	-62.1713	0.673852	0.470903	zinc finger, C3HC4 type domain containing protein, expressed
LOC_Os07g34390	magenta	0.631298	89.68	24.1087	65.5713	-41.4626	0.631298	0.365223	ankyrin repeat family protein, putative, expressed
LOC_Os01g59550	magenta	0.712234	455.107	55.6828	399.425	-343.742	0.712234	0.754485	senescence-induced receptor-like serine/threonine-protein kinase precursor, putative, expressed
LOC_Os01g59530	magenta	0.831123	328.849	117.187	211.662	-94.4749	0.831123	0.68131	OsCML1 - Calmodulin-related calcium sensor protein, expressed
LOC_Os01g20840	magenta	0.709658	115.471	40.4044	75.0665	-34.6621	0.709658	0.289602	lipase class 3 family protein, putative, expressed
LOC_Os01g47070	magenta	0.847494	423.866	132.779	291.087	-158.307	0.847494	0.74553	glycosyl hydrolase, putative, expressed
LOC_Os07g38620	magenta	0.746806	213.213	52.1833	161.029	-108.846	0.746806	0.455507	pyridoxamine 5'-phosphate oxidase family protein, putative, expressed
LOC_Os03g62340	magenta	0.937719	266.15	155.875	110.276	45.5987	0.937719	0.629502	protein kinase family protein, putative, expressed
LOC_Os03g62330	magenta	0.774681	214.231	61.9943	152.237	-90.2427	0.774681	0.729681	expressed protein
LOC_Os04g12580	magenta	0.522259	36.6035	9.77175	26.8318	-17.06	0.522259	0.291304	receptor-like protein kinase, putative, expressed
LOC_Os03g62860	magenta	0.873442	212.256	103.162	109.095	-5.93291	0.873442	0.635323	glucan endo-1,3-beta-glucosidase precursor, putative, expressed
LOC_Os11g46000	magenta	0.861968	327.185	111.651	215.535	-103.884	0.861968	0.771439	von Willebrand factor type A domain containing protein, putative, expressed
LOC_Os11g25110	magenta	0.656982	95.0664	30.9889	64.0776	-33.0887	0.656982	0.351773	tropinone reductase 2, putative, expressed
LOC_Os10g37340	magenta	0.889884	215.082	120.645	94.4372	26.2077	0.889884	0.595306	cystathionine gamma-synthase, putative, expressed
LOC_Os06g06480	magenta	0.72378	203.705	43.7652	159.94	-116.175	0.72378	0.574058	Core histone H2A/H2B/H3/H4 domain containing protein, putative, expressed
LOC_Os03g11420	magenta	0.79296	728.82	95.1822	633.638	-538.456	0.79296	0.747283	Os3bglu6 - beta-glucosidase/beta-fucosidase/beta-galactosidase, expressed
LOC_Os07g34110	magenta	0.96524	399.626	200.608	199.017	1.59112	0.96524	0.752559	integral membrane protein DUF6 containing protein, expressed
LOC_Os10g33040	magenta	0.732662	163.302	65.0565	98.2453	-33.1888	0.732662	0.467331	receptor-like protein kinase precursor, putative, expressed
LOC_Os01g62830	magenta	0.714155	78.4769	34.1904	44.2865	-10.0962	0.714155	0.337029	expressed protein
LOC_Os05g40890	magenta	0.799719	143.695	70.9489	72.7461	-1.79721	0.799719	0.340202	expressed protein
LOC_Os02g36140	magenta	0.657405	124.458	28.0417	96.4168	-68.375	0.657405	0.542759	terpene synthase, putative, expressed
LOC_Os07g03710	magenta	0.747072	710.093	82.082	628.011	-545.929	0.747072	0.829587	SCP-like extracellular protein, expressed
LOC_Os03g48060	magenta	0.819199	641.023	109.931	531.092	-421.16	0.819199	0.813168	class I glutamine amidotransferase, putative, expressed
LOC_Os07g03780	magenta	0.751734	109.567	48.5903	60.9768	-12.3866	0.751734	0.637247	lectin-like receptor kinase, putative, expressed
LOC_Os05g36980	magenta	0.628935	126.516	24.4255	102.091	-77.6652	0.628935	0.52621	expressed protein
LOC_Os02g36020	magenta	0.514516	44.8229	11.5557	33.2673	-21.7116	0.514516	0.404439	transposon protein, putative, CACTA, En/Spm sub-class, expressed
LOC_Os07g42970	magenta	0.532066	18.1563	5.92619	12.2301	-6.30389	0.532066	0.365053	UDP-glucoronosyl and UDP-glucosyl transferase domain containing protein, expressed
LOC_Os02g36030	magenta	0.84034	463.867	113.96	349.907	-235.947	0.84034	0.847691	cytochrome P450, putative, expressed
LOC_Os08g16810	magenta	0.901243	260.429	139.079	121.351	17.728	0.901243	0.690583	retrotransposon protein, putative, SINE subclass, expressed
LOC_Os08g16820	magenta	0.946022	270.32	171.692	98.6285	73.0633	0.946022	0.524315	retrotransposon protein, putative, SINE subclass, expressed
LOC_Os02g36070	magenta	0.843016	213.309	99.3997	113.91	-14.51	0.843016	0.722221	cytochrome P450, putative, expressed
LOC_Os01g55330	magenta	0.579088	78.2877	26.3133	51.9743	-25.661	0.579088	0.370816	embryonic protein DC-8, putative, expressed
LOC_Os10g33270	magenta	0.683331	267.575	41.4462	226.129	-184.683	0.683331	0.658745	cyanate hydratase, putative, expressed
LOC_Os07g03820	magenta	0.540599	48.1364	10.376	37.7604	-27.3844	0.540599	0.49567	lectin-like receptor kinase, putative, expressed
LOC_Os02g13890	magenta	0.721036	66.5594	33.4989	33.0605	0.43841	0.721036	0.387833	FYVE zinc finger domain containing protein, expressed
LOC_Os07g03870	magenta	0.738632	62.529	34.5932	27.9357	6.65751	0.738632	0.481311	receptor like protein kinase, putative, expressed
LOC_Os05g29000	magenta	0.637481	94.9594	20.5695	74.3899	-53.8205	0.637481	0.479468	expressed protein
LOC_Os01g55340	magenta	0.702655	188.72	43.2667	145.453	-102.186	0.702655	0.28064	dof zinc finger domain containing protein, putative, expressed
LOC_Os10g33210	magenta	0.642388	90.1584	35.048	55.1104	-20.0624	0.642388	0.434031	peptide transporter PTR3-A, putative, expressed
LOC_Os01g03630	magenta	0.787758	124.343	57.6937	66.6497	-8.95599	0.787758	0.576651	multicopper oxidase domain containing protein, expressed
LOC_Os05g36910	magenta	0.828504	398.402	100.309	298.093	-197.784	0.828504	0.617005	NC domain-containing protein, putative, expressed
LOC_Os06g06120	magenta	0.839413	229.508	88.3263	141.182	-52.8557	0.839413	0.657873	expressed protein
LOC_Os01g55940	magenta	0.891467	575.064	148.905	426.159	-277.254	0.891467	0.877228	OsGH3.2 - Probable indole-3-acetic acid-amido synthetase, expressed
LOC_Os03g11734	magenta	0.930463	269.45	157.458	111.992	45.4668	0.930463	0.643975	MATE efflux protein, putative, expressed
LOC_Os05g08390	magenta	0.824154	169.105	89.9341	79.1712	10.7629	0.824154	0.585898	expressed protein
LOC_Os05g08430	magenta	0.770007	282.576	62.0924	220.483	-158.391	0.770007	0.599515	boron transporter protein, putative, expressed
LOC_Os09g19820	magenta	0.625128	118.672	20.3299	98.3416	-78.0117	0.625128	0.49711	aminopeptidase, putative, expressed
LOC_Os03g27780	magenta	0.867413	165.266	97.0628	68.203	28.8597	0.867413	0.472757	protein phosphotase protein, putative, expressed
LOC_Os01g03390	magenta	0.633575	55.8948	23.8619	32.033	-8.17112	0.633575	0.472864	BBTI7 - Bowman-Birk type bran trypsin inhibitor precursor, expressed
LOC_Os10g13940	magenta	0.582785	70.1377	19.0625	51.0753	-32.0128	0.582785	0.159259	MATE efflux protein, putative, expressed
LOC_Os01g66890	magenta	0.66392	89.8877	27.5946	62.2931	-34.6986	0.66392	0.37545	BTBZ1 - Bric-a-Brac, Tramtrack, and Broad Complex BTB domain with TAZ zinc finger and Calmodulin-binding domains, expressed
LOC_Os05g45450	magenta	0.888197	332.396	128.174	204.222	-76.0476	0.888197	0.672038	DUF584 domain containing protein, putative, expressed
LOC_Os01g03330	magenta	0.64423	69.505	25.9505	43.5545	-17.604	0.64423	0.307477	BBTI3 - Bowman-Birk type bran trypsin inhibitor precursor, expressed
LOC_Os04g40410	magenta	0.847622	273.23	109.426	163.803	-54.377	0.847622	0.688808	high affinity nitrate transporter, putative, expressed
LOC_Os09g19970	magenta	0.790606	126.764	60.5979	66.1665	-5.56856	0.790606	0.403862	expressed protein
LOC_Os07g07800	magenta	0.53487	42.0897	8.31761	33.7721	-25.4545	0.53487	0.303021	PHA synthase, putative, expressed
LOC_Os04g28540	magenta	0.590623	76.1992	21.0591	55.1401	-34.081	0.590623	0.154453	expressed protein
LOC_Os07g13810	magenta	0.793892	160.876	68.0671	92.8088	-24.7416	0.793892	0.597748	cytokinin-N-glucosyltransferase 1, putative, expressed
LOC_Os04g28520	magenta	0.658613	80.7695	33.9767	46.7928	-12.8162	0.658613	0.510253	male sterility protein, putative, expressed
LOC_Os04g58734	magenta	0.815932	213.991	76.1185	137.873	-61.7544	0.815932	0.520748	expressed protein
LOC_Os04g58740	magenta	0.880838	286.97	127.361	159.61	-32.2494	0.880838	0.69473	expressed protein
LOC_Os01g15990	magenta	0.942594	304.384	166.576	137.808	28.7677	0.942594	0.679373	expressed protein
LOC_Os01g66850	magenta	0.825886	232.104	103.905	128.199	-24.2937	0.825886	0.59205	pectinacetylesterase domain containing protein, expressed
LOC_Os03g50610	magenta	0.613143	44.7301	14.813	29.9171	-15.1042	0.613143	0.446569	expressed protein
LOC_Os09g34250	magenta	0.75868	151.739	63.352	88.3875	-25.0355	0.75868	0.189272	UDP-glucoronosyl and UDP-glucosyl transferase domain containing protein, expressed
LOC_Os01g08820	magenta	0.513484	45.388	7.78961	37.5984	-29.8087	0.513484	0.253693	PHD-finger domain containing protein, putative, expressed
LOC_Os01g08810	magenta	0.605146	90.4567	33.6059	56.8507	-23.2448	0.605146	0.365668	cytochrome P450, putative, expressed
LOC_Os01g73000	magenta	0.642508	130.973	29.8783	101.095	-71.2163	0.642508	0.0949765	copine, putative, expressed
LOC_Os01g11650	magenta	0.854647	254.472	101.059	153.413	-52.3538	0.854647	0.533613	GDSL-like lipase/acylhydrolase, putative, expressed
LOC_Os12g16200	magenta	0.667396	116.568	47.3036	69.2648	-21.9613	0.667396	0.287422	glutathione synthetase, chloroplast precursor, putative, expressed
LOC_Os07g07070	magenta	0.789453	183.735	65.7975	117.937	-52.1399	0.789453	0.730204	anthranilate phosphoribosyltransferase, putative, expressed
LOC_Os03g44760	magenta	0.710834	77.898	35.2006	42.6974	-7.49679	0.710834	0.392499	SWI1, putative, expressed
LOC_Os04g04330	magenta	0.646007	62.9302	21.1924	41.7378	-20.5455	0.646007	0.235666	receptor-like protein kinase 2 precursor, putative, expressed
LOC_Os12g43440	magenta	0.850738	543.599	121.322	422.277	-300.955	0.850738	0.853807	thaumatin, putative, expressed
LOC_Os12g43450	magenta	0.85911	420.75	118.643	302.108	-183.465	0.85911	0.876531	thaumatin family domain containing protein, expressed
LOC_Os05g33150	magenta	0.829762	269.564	87.3427	182.221	-94.8782	0.829762	0.554557	CHIT6 - Chitinase family protein precursor, expressed
LOC_Os05g33130	magenta	0.893971	282.423	144.825	137.598	7.22761	0.893971	0.608685	CHIT17 - Chitinase family protein precursor, expressed
LOC_Os01g11810	magenta	0.816831	283.251	96.0828	187.168	-91.0855	0.816831	0.603319	powdery mildew resistant protein 5, putative, expressed
LOC_Os12g43490	magenta	0.729908	115.825	51.2237	64.6011	-13.3774	0.729908	0.555732	thaumatin, putative, expressed
LOC_Os07g46240	magenta	0.820497	201	72.795	128.205	-55.4095	0.820497	0.64588	choline transporter-related, putative, expressed
LOC_Os06g07000	magenta	0.800148	234.182	88.5051	145.677	-57.1716	0.800148	0.370729	OsFBL28 - F-box domain and LRR containing protein, expressed
LOC_Os12g43750	magenta	0.796551	144.382	71.8384	72.5436	-0.705225	0.796551	0.354267	expressed protein
LOC_Os10g38150	magenta	0.920774	229.397	141.689	87.7078	53.9809	0.920774	0.520615	glutathione S-transferase, N-terminal domain containing protein, expressed
LOC_Os10g38140	magenta	0.831741	216.788	91.8323	124.955	-33.123	0.831741	0.295429	glutathione S-transferase, putative, expressed
LOC_Os02g17330	magenta	0.702165	208.666	51.0385	157.627	-106.589	0.702165	0.0852724	aminotransferase domain containing protein, putative, expressed
LOC_Os01g11910	magenta	0.854249	205.251	98.147	107.104	-8.9569	0.854249	0.390882	basic helix-loop-helix, putative, expressed
LOC_Os09g19640	magenta	0.780751	256.732	66.0051	190.726	-124.721	0.780751	0.414066	holocarboxylase synthetase, putative, expressed
LOC_Os03g44540	magenta	0.740291	101.861	40.1628	61.6978	-21.5351	0.740291	0.594613	nuclear transcription factor Y subunit, putative, expressed
LOC_Os06g07150	magenta	0.501078	22.8489	5.50504	17.3438	-11.8388	0.501078	0.306026	expressed protein
LOC_Os01g43100	magenta	0.761053	127.555	54.9026	72.6527	-17.75	0.761053	0.267475	protein phosphatase 2C, putative, expressed
LOC_Os01g11860	magenta	0.753719	119.47	52.9377	66.532	-13.5942	0.753719	0.306986	DJ-1 family protein, putative, expressed
LOC_Os01g43140	magenta	0.92311	530.937	173.512	357.425	-183.914	0.92311	0.817826	lipase, putative, expressed
LOC_Os01g43160	magenta	0.969817	439.513	206.208	233.305	-27.0967	0.969817	0.757588	polygalacturonase, putative, expressed
LOC_Os10g21790	magenta	0.730205	112.867	46.0106	66.8561	-20.8454	0.730205	0.421604	dehydration stress-induced protein, putative, expressed
LOC_Os09g27500	magenta	0.616695	58.0877	16.4103	41.6773	-25.267	0.616695	0.381589	cytochrome P450, putative, expressed
LOC_Os05g33320	magenta	0.833319	193.946	95.3009	98.6455	-3.34455	0.833319	0.61771	expressed protein
LOC_Os11g45740	magenta	0.924162	274.5	148.941	125.559	23.3823	0.924162	0.546992	MYB family transcription factor, putative, expressed
LOC_Os07g07410	magenta	0.93136	382.445	171.073	211.373	-40.2999	0.93136	0.661672	oxidoreductase, 2OG-Fe oxygenase family protein, putative, expressed
LOC_Os03g28300	magenta	0.64637	120.016	39.2096	80.8069	-41.5973	0.64637	0.440124	protein kinase domain containing protein, expressed
LOC_Os01g08460	magenta	0.8529	261.863	107.215	154.648	-47.4338	0.8529	0.565268	TMS membrane protein/tumour differentially expressed protein, putative, expressed
LOC_Os01g11946	magenta	0.562132	84.6704	16.7476	67.9228	-51.1753	0.562132	0.065578	ABC transporter, ATP-binding protein, putative, expressed
LOC_Os05g33310	magenta	0.865371	229.439	106.632	122.807	-16.1752	0.865371	0.56859	oxidoreductase, 2OG-Fe oxygenase family protein, putative, expressed
LOC_Os09g34214	magenta	0.648272	67.0127	21.1096	45.9032	-24.7936	0.648272	0.632843	UDP-glucoronosyl and UDP-glucosyl transferase domain containing protein, expressed
LOC_Os05g33300	magenta	0.67203	156.886	30.6069	126.279	-95.6724	0.67203	0.533501	tat pathway signal sequence family protein, expressed
LOC_Os05g08570	magenta	0.925918	402.445	160.586	241.859	-81.2734	0.925918	0.626836	OsIAA15 - Auxin-responsive Aux/IAA gene family member, expressed
LOC_Os07g14590	magenta	0.780427	373.825	72.5009	301.324	-228.823	0.780427	0.572559	hydrolase, putative, expressed
LOC_Os10g33420	magenta	0.766688	161.803	59.8512	101.952	-42.1004	0.766688	0.541715	non-lysosomal glucosylceramidase, putative, expressed
LOC_Os05g45900	magenta	0.645811	133.81	31.9605	101.85	-69.8894	0.645811	0.218044	endonuclease/exonuclease/phosphatase family domain containing protein, expressed
LOC_Os06g41840	magenta	0.736992	84.6951	41.1051	43.59	-2.48491	0.736992	0.318309	reductase, putative, expressed
LOC_Os07g18874	magenta	0.899261	207.555	121.558	85.997	35.5607	0.899261	0.682102	white-brown complex homolog protein 11, putative, expressed
LOC_Os01g08320	magenta	0.941655	413.501	191.58	221.921	-30.3405	0.941655	0.667913	OsIAA1 - Auxin-responsive Aux/IAA gene family member, expressed
LOC_Os01g67430	magenta	0.678165	163.34	49.9544	113.386	-63.4315	0.678165	0.571964	lipase, putative, expressed
LOC_Os10g33540	magenta	0.805428	346.819	82.1444	264.675	-182.531	0.805428	0.50563	alcohol oxidase, putative, expressed
LOC_Os07g02690	magenta	0.736339	151.831	45.3141	106.517	-61.2027	0.736339	0.636646	DUF538 domain containing protein, putative, expressed
LOC_Os04g47080	magenta	0.794016	282.976	96.3043	186.672	-90.3676	0.794016	0.635201	anthocyanin regulatory Lc protein, putative, expressed
LOC_Os09g27750	magenta	0.931332	354.491	166.041	188.45	-22.4085	0.931332	0.779555	1-aminocyclopropane-1-carboxylate oxidase 1, putative, expressed
LOC_Os11g37970	magenta	0.883652	349.96	135.607	214.353	-78.7451	0.883652	0.797467	WIP5 - Wound-induced protein precursor, expressed
LOC_Os11g37940	magenta	0.650831	93.1873	25.3517	67.8356	-42.4839	0.650831	0.581545	WIP2 - Wound-induced protein precursor, expressed
LOC_Os11g37960	magenta	0.88653	324.382	140.483	183.899	-43.4164	0.88653	0.753649	WIP4 - Wound-induced protein precursor, expressed
LOC_Os11g37950	magenta	0.92005	273.082	149.621	123.461	26.1596	0.92005	0.695806	WIP3 - Wound-induced protein precursor, expressed
LOC_Os11g37920	magenta	0.738152	119.64	54.6805	64.9596	-10.2792	0.738152	0.32188	DJ-1 family protein, putative, expressed
LOC_Os09g27820	magenta	0.784972	146.224	64.8912	81.3325	-16.4413	0.784972	0.568595	1-aminocyclopropane-1-carboxylate oxidase protein, putative, expressed
LOC_Os03g28160	magenta	0.754	165.822	63.5459	102.277	-38.7306	0.754	0.390154	jacalin-like lectin domain containing protein, expressed
LOC_Os05g33080	magenta	0.881166	486.043	148.436	337.606	-189.17	0.881166	0.722272	serine/threonine-protein kinase, putative, expressed
LOC_Os08g31200	magenta	0.941204	247.612	161.985	85.6275	76.3573	0.941204	0.55373	cytokinin-O-glucosyltransferase 2, putative, expressed
LOC_Os05g48840	magenta	0.914786	539.746	168.764	370.982	-202.219	0.914786	0.831646	expressed protein
LOC_Os04g59120	magenta	0.573544	28.4503	8.10309	20.3472	-12.2441	0.573544	0.352965	auxin-induced protein 5NG4, putative, expressed
LOC_Os01g16450	magenta	0.834481	173.627	97.2829	76.3445	20.9383	0.834481	0.567018	peroxidase precursor, putative, expressed
LOC_Os08g39630	magenta	0.822567	169.974	74.7636	95.2099	-20.4463	0.822567	0.39162	helix-loop-helix DNA-binding domain containing protein, expressed
LOC_Os01g08110	magenta	0.813378	140.023	85.7662	54.2567	31.5094	0.813378	0.418363	flavonol-3-O-glycoside-7-O-glucosyltransferase 1, putative, expressed
LOC_Os01g36060	magenta	0.658678	89.5798	26.1724	63.4074	-37.2351	0.658678	0.55483	expressed protein
LOC_Os08g31130	magenta	0.869118	270.958	115.452	155.506	-40.0548	0.869118	0.642289	integral membrane protein DUF6 containing protein, expressed
LOC_Os06g41930	magenta	0.540753	71.6339	12.7127	58.9212	-46.2085	0.540753	0.437719	zinc-binding protein, putative, expressed
LOC_Os06g18670	magenta	0.819899	187.147	81.986	105.161	-23.1754	0.819899	0.549853	anthocyanidin 3-O-glucosyltransferase, putative, expressed
LOC_Os01g36070	magenta	0.907121	248.095	133.646	114.449	19.1972	0.907121	0.473996	nodulin MtN3 family protein, putative, expressed
LOC_Os10g33760	magenta	0.919631	534.373	167.889	366.484	-198.594	0.919631	0.813183	No apical meristem protein, putative, expressed
LOC_Os04g59210	magenta	0.962822	403.012	204.47	198.542	5.9286	0.962822	0.710794	peroxidase precursor, putative, expressed
LOC_Os07g46846	magenta	0.805392	591.564	101.076	490.487	-389.411	0.805392	0.847351	sex determination protein tasselseed-2, putative, expressed
LOC_Os07g46852	magenta	0.538404	44.8008	9.30314	35.4976	-26.1945	0.538404	0.0512969	sex determination protein tasselseed-2, putative, expressed
LOC_Os07g46870	magenta	0.774141	235.659	83.69	151.969	-68.2791	0.774141	0.633401	sex determination protein tasselseed-2, putative, expressed
LOC_Os01g50940	magenta	0.928064	354.74	163.25	191.49	-28.2398	0.928064	0.753013	helix-loop-helix DNA-binding domain containing protein, expressed
LOC_Os07g18710	magenta	0.651377	55.0804	17.5684	37.512	-19.9437	0.651377	0.539703	OsFBLD8 - F-box, LRR and FBD domain containing protein, expressed
LOC_Os11g41870	magenta	0.863704	239.469	111.024	128.445	-17.4211	0.863704	0.780783	transporter family protein, putative, expressed
LOC_Os11g41875	magenta	0.648978	62.3267	24.7395	37.5872	-12.8477	0.648978	0.371794	membrane protein, putative, expressed
LOC_Os10g18510	magenta	0.521826	25.2552	7.55331	17.7019	-10.1486	0.521826	0.449186	UDP-glucoronosyl and UDP-glucosyl transferase domain containing protein, expressed
LOC_Os04g47400	magenta	0.862346	293.287	117.487	175.8	-58.3125	0.862346	0.646217	monocopper oxidase, putative, expressed
LOC_Os08g35750	magenta	0.898054	392.384	137.558	254.826	-117.269	0.898054	0.788311	Cupin domain containing protein, expressed
LOC_Os06g10350	magenta	0.865723	216.969	113.048	103.921	9.12672	0.865723	0.551752	MYB family transcription factor, putative, expressed
LOC_Os10g25310	magenta	0.778126	165.461	61.0488	104.412	-43.363	0.778126	0.429099	SPX domain containing protein, putative, expressed
LOC_Os03g02920	magenta	0.94706	324.546	169.475	155.072	14.4031	0.94706	0.720842	peroxidase precursor, putative, expressed
LOC_Os03g51080	magenta	0.884519	227.801	120.97	106.831	14.1397	0.884519	0.469264	glutamate decarboxylase, putative, expressed
LOC_Os06g18900	magenta	0.471982	52.3102	7.98608	44.3241	-36.3381	0.471982	0.426798	cadmium tolerance factor, putative, expressed
LOC_Os08g05440	magenta	0.713892	74.3588	33.519	40.8398	-7.32073	0.713892	0.521662	NB-ARC domain containing protein, expressed
LOC_Os06g46350	magenta	0.710853	99.3142	42.3539	56.9603	-14.6064	0.710853	0.387421	PLA IIIA/PLP7, putative, expressed
LOC_Os03g51030	magenta	0.721554	131.428	46.8103	84.6182	-37.8079	0.721554	0.293112	phytochrome A, putative, expressed
LOC_Os08g35860	magenta	0.893594	305.253	130.317	174.936	-44.6188	0.893594	0.592994	cytokinin dehydrogenase precursor, putative, expressed
LOC_Os03g51050	magenta	0.714691	149.675	47.5818	102.093	-54.5114	0.714691	0.197441	peptide transporter PTR2, putative, expressed
LOC_Os01g73740	magenta	0.41693	16.9015	3.38799	13.5135	-10.1255	0.41693	0.325446	lipase, putative, expressed
LOC_Os03g02850	magenta	0.81253	193.818	75.2724	118.545	-43.273	0.81253	0.652017	tobamovirus multiplication protein, putative, expressed
LOC_Os01g43700	magenta	0.517037	62.7812	18.5136	44.2676	-25.754	0.517037	0.271055	cytochrome P450 72A1, putative, expressed
LOC_Os07g10850	magenta	0.746312	67.6919	35.5191	32.1728	3.34625	0.746312	0.429254	retrotransposon protein, putative, unclassified, expressed
LOC_Os09g34930	magenta	0.730737	161.688	57.1784	104.51	-47.3314	0.730737	0.398837	3-ketoacyl-CoA synthase precursor, putative, expressed
LOC_Os01g59900	magenta	0.800379	489.962	80.2076	409.755	-329.547	0.800379	0.719173	expressed protein
LOC_Os03g02685	magenta	0.813696	306.29	90.7674	215.522	-124.755	0.813696	0.547741	lysM domain containing protein, putative, expressed
LOC_Os06g46270	magenta	0.858646	223.07	115.972	107.098	8.87318	0.858646	0.572306	no apical meristem protein, putative, expressed
LOC_Os06g20790	magenta	0.866153	253.522	121.775	131.746	-9.97127	0.866153	0.653725	SAM dependent carboxyl methyltransferase, putative, expressed
LOC_Os10g25010	magenta	0.805573	181.256	82.6883	98.5674	-15.8791	0.805573	0.51894	OsCML8 - Calmodulin-related calcium sensor protein, expressed
LOC_Os01g59970	magenta	0.820362	153.217	75.4354	77.7815	-2.34604	0.820362	0.516856	expressed protein
LOC_Os05g48400	magenta	0.754119	73.8502	39.3471	34.5031	4.84396	0.754119	0.406141	expressed protein
LOC_Os08g05720	magenta	0.835339	143.658	83.5392	60.1188	23.4204	0.835339	0.58546	integral membrane protein, putative, expressed
LOC_Os06g20820	magenta	0.843704	223.368	106.157	117.211	-11.0539	0.843704	0.53581	expressed protein
LOC_Os07g39530	magenta	0.809332	142.696	78.2011	64.4944	13.7067	0.809332	0.519217	BTBN16 - Bric-a-Brac, Tramtrack, Broad Complex BTB domain with non-phototropic hypocotyl 3 NPH3 domain, expressed
LOC_Os08g43250	magenta	0.901758	265.049	136.838	128.211	8.62703	0.901758	0.736528	MATE efflux family protein, putative, expressed
LOC_Os07g39510	magenta	0.6794	84.0944	22.9743	61.1201	-38.1457	0.6794	0.429611	yippee zinc-binding protein, putative, expressed
LOC_Os03g02530	magenta	0.863348	707.184	134.568	572.616	-438.048	0.863348	0.859083	OsRhmbd7 - Putative Rhomboid homologue, expressed
LOC_Os01g59890	magenta	0.607227	84.4847	25.8003	58.6844	-32.884	0.607227	0.465823	pentatricopeptide, putative, expressed
LOC_Os02g47950	magenta	0.822096	671.602	109.335	562.268	-452.933	0.822096	0.838754	expressed protein
LOC_Os07g26660	magenta	0.837747	298.252	108.917	189.335	-80.4183	0.837747	0.690751	aquaporin protein, putative, expressed
LOC_Os11g37700	magenta	0.865173	303.63	117.252	186.378	-69.1263	0.865173	0.737529	pleiotropic drug resistance protein, putative, expressed
LOC_Os04g47270	magenta	0.511691	41.6859	7.92552	33.7604	-25.8349	0.511691	0.303985	amine oxidase, putative, expressed
LOC_Os01g73500	magenta	0.798464	220.34	91.8085	128.532	-36.7232	0.798464	0.539958	expressed protein
LOC_Os08g43120	magenta	0.876791	217.57	120.238	97.3319	22.9061	0.876791	0.697613	Plant PDR ABC transporter associated domain containing protein, expressed
LOC_Os10g07010	magenta	0.891807	331.793	138.678	193.116	-54.4381	0.891807	0.74936	3-ketoacyl-CoA synthase, putative, expressed
LOC_Os02g08110	magenta	0.900208	226.942	126.044	100.898	25.1462	0.900208	0.559746	membrane associated DUF588 domain containing protein, putative, expressed
LOC_Os04g53360	magenta	0.632584	48.5696	12.6386	35.931	-23.2923	0.632584	0.452512	expressed protein
LOC_Os10g18150	magenta	0.705193	186.84	55.0733	131.767	-76.6939	0.705193	0.691738	crooked neck, putative, expressed
LOC_Os05g09724	magenta	0.628715	32.712	14.4655	18.2465	-3.78098	0.628715	0.502655	HAD superfamily phosphatase, putative, expressed
LOC_Os07g39350	magenta	0.840489	173.688	94.2771	79.4107	14.8664	0.840489	0.382248	transporter family protein, putative, expressed
LOC_Os10g25570	magenta	0.686425	202.507	45.5261	156.981	-111.455	0.686425	0.38699	expressed protein
LOC_Os04g47930	magenta	0.57817	35.2154	11.4919	23.7235	-12.2315	0.57817	0.378638	aluminum-activated malate transporter, putative, expressed
LOC_Os04g53240	magenta	0.886962	256.782	123.189	133.592	-10.4031	0.886962	0.582605	autophagy-related protein, putative, expressed
LOC_Os02g35860	magenta	0.811386	219.465	73.9533	145.512	-71.5585	0.811386	0.548172	expressed protein
LOC_Os07g10420	magenta	0.634803	60.812	22.3054	38.5066	-16.2012	0.634803	0.326487	expressed protein
LOC_Os07g10470	magenta	0.59511	113.683	17.1921	96.4913	-79.2992	0.59511	0.59161	transposon protein, putative, unclassified, expressed
LOC_Os12g43880	magenta	0.764857	116.191	56.1657	60.0258	-3.86009	0.764857	0.541979	DNA binding protein, putative, expressed
LOC_Os08g12800	magenta	0.585914	37.7046	16.5653	21.1392	-4.5739	0.585914	0.284286	glucan endo-1,3-beta-glucosidase precursor, putative, expressed
LOC_Os12g31850	magenta	0.769632	366.053	68.7716	297.282	-228.51	0.769632	0.767045	ureide permease, putative, expressed
LOC_Os04g16160	magenta	0.517753	23.7515	4.96553	18.786	-13.8204	0.517753	0.215221	expressed protein
LOC_Os01g43520	magenta	0.780649	157.385	66.8617	90.5229	-23.6612	0.780649	0.434114	neutral ceramidase precursor, putative, expressed
LOC_Os01g73170	magenta	0.842025	294.991	89.8169	205.175	-115.358	0.842025	0.358122	peroxidase precursor, putative, expressed
LOC_Os02g54980	magenta	0.735696	113.558	42.7267	70.8312	-28.1046	0.735696	0.472222	pheophorbide a oxygenase, chloroplast precursor, putative, expressed
LOC_Os06g46670	magenta	0.680854	127.636	34.7796	92.8559	-58.0763	0.680854	0.280868	glutamate receptor, putative, expressed
LOC_Os07g22760	magenta	0.61171	68.6309	21.6585	46.9724	-25.3139	0.61171	0.161175	conserved hypothetical protein
LOC_Os04g47780	magenta	0.70723	115.016	43.3445	71.6713	-28.3268	0.70723	0.493554	transmembrane amino acid transporter protein, putative, expressed
LOC_Os01g73040	magenta	0.657624	78.0962	24.6369	53.4593	-28.8223	0.657624	0.495653	CBS domain-containing protein, putative, expressed
LOC_Os01g50110	magenta	0.63123	83.7124	32.785	50.9274	-18.1425	0.63123	0.425566	MYB family transcription factor, putative, expressed
LOC_Os01g50160	magenta	0.756018	102.871	51.7416	51.1293	0.612301	0.756018	0.441474	MDR-like ABC transporter, putative, expressed
LOC_Os10g12190	magenta	0.942086	303.659	164.247	139.411	24.8362	0.942086	0.738584	nodulin, putative, expressed
LOC_Os06g46920	magenta	0.578692	86.9909	20.381	66.6099	-46.229	0.578692	0.0295518	dihydroflavonol-4-reductase, putative, expressed
LOC_Os12g40419	magenta	0.957274	463.151	198.505	264.645	-66.1402	0.957274	0.780226	protein kinase domain containing protein, expressed
LOC_Os12g09300	magenta	0.778265	187.27	71.8422	115.427	-43.585	0.778265	0.473452	amino acid transporter, putative, expressed
LOC_Os03g06290	magenta	0.7444	121.1	44.631	76.469	-31.8381	0.7444	0.623093	OsSub27 - Putative Subtilisin homologue, expressed
LOC_Os07g37890	magenta	0.950716	341.323	171.3	170.023	1.27766	0.950716	0.570847	protein phosphatase 2C, putative, expressed
LOC_Os02g49760	magenta	0.813819	222.841	77.3894	145.451	-68.0617	0.813819	0.648352	potassium transporter, putative, expressed
LOC_Os05g25784	magenta	0.680695	71.1447	28.822	42.3227	-13.5007	0.680695	0.245969	expressed protein
LOC_Os12g36170	magenta	0.687015	102.1	30.6049	71.4952	-40.8903	0.687015	0.268398	HEAT repeat family protein, putative, expressed
LOC_Os02g53200	magenta	0.863172	223.113	109.47	113.642	-4.17207	0.863172	0.668698	glucan endo-1,3-beta-glucosidase precursor, putative, expressed
LOC_Os07g49460	magenta	0.670487	81.0145	25.5766	55.4379	-29.8613	0.670487	0.511736	response regulator receiver domain containing protein, expressed
LOC_Os09g16449	magenta	0.73577	103.036	41.2473	61.7887	-20.5414	0.73577	0.561415	pleiotropic drug resistance protein 4, putative, expressed
LOC_Os09g16458	magenta	0.656808	94.3945	26.6301	67.7644	-41.1343	0.656808	0.525156	pleiotropic drug resistance protein 4, putative, expressed
LOC_Os02g49860	magenta	0.911869	496.472	155.772	340.7	-184.928	0.911869	0.813207	AWPM-19-like membrane family protein, putative, expressed
LOC_Os07g37730	magenta	0.670744	108.066	28.8182	79.2473	-50.4291	0.670744	0.296483	NADH-ubiquinone oxidoreductase, mitochondrial precursor, putative, expressed
LOC_Os01g33110	magenta	0.722345	152.964	47.32	105.644	-58.3241	0.722345	0.686124	receptor-like protein kinase 5 precursor, putative, expressed
LOC_Os06g36210	magenta	0.903218	499.845	159.8	340.045	-180.245	0.903218	0.671219	amino acid transporter, putative, expressed
LOC_Os05g37080	magenta	0.689706	73.2679	24.4756	48.7924	-24.3168	0.689706	0.669451	No apical meristem protein, putative, expressed
LOC_Os03g47810	magenta	0.548878	36.7756	11.2947	25.4809	-14.1863	0.548878	0.424175	nodulin family protein, putative, expressed
LOC_Os01g41960	magenta	0.905601	466.919	154.403	312.516	-158.113	0.905601	0.868569	retrotransposon protein, putative, unclassified, expressed
LOC_Os01g26390	magenta	0.808324	111.51	66.309	45.2008	21.1082	0.808324	0.452346	TKL_IRAK_DUF26-lh.1 - DUF26 kinases have homology to DUF26 containing loci, expressed
LOC_Os08g07280	magenta	0.83916	357.719	95.2728	262.446	-167.173	0.83916	0.666652	expressed protein
LOC_Os04g39320	magenta	0.863108	217.981	106.424	111.557	-5.13354	0.863108	0.52198	expressed protein
LOC_Os03g06430	magenta	0.770673	95.0757	48.3518	46.7239	1.62785	0.770673	0.493293	expressed protein
LOC_Os07g33620	magenta	0.850609	172.025	93.1741	78.8507	14.3234	0.850609	0.604821	cytochrome P450 domain containing protein, expressed
LOC_Os02g53410	magenta	0.826902	501.382	105.989	395.393	-289.404	0.826902	0.683507	expressed protein
LOC_Os02g44136	magenta	0.699007	198.422	38.2648	160.157	-121.892	0.699007	0.572169	retrotransposon protein, putative, Ty1-copia subclass, expressed
LOC_Os06g36180	magenta	0.896509	285.135	137.367	147.768	-10.4017	0.896509	0.542615	amino acid transporter, putative, expressed
LOC_Os11g24780	magenta	0.705271	108.857	39.2071	69.6495	-30.4425	0.705271	0.483589	expressed protein
LOC_Os09g07440	magenta	0.628918	77.1586	20.4641	56.6945	-36.2304	0.628918	0.215005	retrotransposon protein, putative, unclassified, expressed
LOC_Os01g61044	magenta	0.674536	103.883	30.315	73.5685	-43.2534	0.674536	0.484775	transmembrane amino acid transporter protein, putative, expressed
LOC_Os07g26110	magenta	0.714251	83.8922	32.5628	51.3294	-18.7666	0.714251	0.612684	membrane associated DUF588 domain containing protein, putative, expressed
LOC_Os05g19110	magenta	0.552019	72.9188	17.6109	55.3079	-37.697	0.552019	0.229394	expressed protein
LOC_Os03g47693	magenta	0.831994	283.057	79.1898	203.867	-124.677	0.831994	0.746025	ankyrin repeat family protein, putative, expressed
LOC_Os08g27780	magenta	0.753	139.489	50.2449	89.2444	-38.9995	0.753	0.459321	OsWAK77 - OsWAK receptor-like cytoplasmic kinase OsWAK-RLCK, expressed
LOC_Os08g07340	magenta	0.498908	18.2793	5.24119	13.0381	-7.79692	0.498908	0.300679	mla1, putative, expressed
LOC_Os01g58100	magenta	0.886061	243.355	121.696	121.66	0.0362148	0.886061	0.686036	polyphenol oxidase, putative, expressed
LOC_Os04g52530	magenta	0.753514	250.657	54.1885	196.469	-142.28	0.753514	0.793984	heavy metal-associated domain containing protein, expressed
LOC_Os11g12050	magenta	0.728448	76.2873	38.5366	37.7507	0.785892	0.728448	0.435066	NBS-LRR type disease resistance protein, putative, expressed
LOC_Os05g25390	magenta	0.780776	157.458	65.2626	92.1952	-26.9326	0.780776	0.407869	tyrosine protein kinase domain containing protein, putative, expressed
LOC_Os03g63510	magenta	0.826673	290.915	91.2723	199.642	-108.37	0.826673	0.616329	pentatricopeptide, putative, expressed
LOC_Os03g47160	magenta	0.642326	85.7393	18.0867	67.6525	-49.5658	0.642326	0.441351	expressed protein
LOC_Os04g15580	magenta	0.826266	149.014	70.6839	78.3296	-7.64576	0.826266	0.655748	serine/threonine-protein kinase receptor precursor, putative, expressed
LOC_Os11g08870	magenta	0.73838	104.243	43.847	60.3965	-16.5495	0.73838	0.498594	retrotransposon protein, putative, unclassified, expressed
LOC_Os04g52640	magenta	0.694925	84.2615	28.4123	55.8491	-27.4368	0.694925	0.556763	SHR5-receptor-like kinase, putative, expressed
LOC_Os01g58280	magenta	0.866437	224.306	110.764	113.542	-2.77824	0.866437	0.612668	OsSub8 - Putative Subtilisin homologue, expressed
LOC_Os02g57250	magenta	0.873648	279.445	114.133	165.312	-51.1792	0.873648	0.589007	OsIAA10 - Auxin-responsive Aux/IAA gene family member, expressed
LOC_Os06g03800	magenta	0.80899	221.924	85.5435	136.381	-50.8371	0.80899	0.492462	pollen ankyrin, putative, expressed
LOC_Os06g03810	magenta	0.707669	72.1838	36.4712	35.7126	0.758638	0.707669	0.478369	expressed protein
LOC_Os01g70820	magenta	0.928505	243.489	148.342	95.1471	53.195	0.928505	0.551244	lumenal PsbP, putative, expressed
LOC_Os01g41810	magenta	0.621374	87.326	19.0266	68.2994	-49.2728	0.621374	0.491337	cytochrome P450 72A1, putative, expressed
LOC_Os08g43670	magenta	0.783608	351.413	72.2256	279.187	-206.962	0.783608	0.471512	RING-H2 finger protein ATL2B, putative, expressed
LOC_Os01g70870	magenta	0.812907	143.04	69.599	73.4413	-3.84232	0.812907	0.554151	ZOS1-23 - C2H2 zinc finger protein, expressed
LOC_Os08g43680	magenta	0.634222	70.7092	26.079	44.6301	-18.5511	0.634222	0.418311	glutathione S-transferase, C-terminal domain containing protein, expressed
LOC_Os08g07080	magenta	0.894738	310.531	130.647	179.884	-49.2363	0.894738	0.731673	terpene synthase, putative, expressed
LOC_Os12g24320	magenta	0.889925	347.838	124.944	222.894	-97.9501	0.889925	0.796878	ATPase 3, putative, expressed
LOC_Os04g52670	magenta	0.84889	315.569	115.78	199.789	-84.0086	0.84889	0.656189	OsSAUR21 - Auxin-responsive SAUR gene family member, expressed
LOC_Os11g01850	magenta	0.732501	120.174	51.6584	68.5154	-16.857	0.732501	0.167028	SAG20, putative, expressed
LOC_Os04g15840	magenta	0.503363	64.7667	10.3425	54.4242	-44.0816	0.503363	0.19168	expansin precursor, putative, expressed
LOC_Os04g52780	magenta	0.754167	151.519	54.3021	97.2169	-42.9148	0.754167	0.617331	leucine-rich repeat receptor protein kinase EXS precursor, putative, expressed
LOC_Os11g30600	magenta	0.621017	65.5774	19.3351	46.2423	-26.9072	0.621017	0.465257	hypothetical protein
LOC_Os07g41070	magenta	0.830716	525.167	112.188	412.979	-300.792	0.830716	0.723292	NAD dependent epimerase/dehydratase family protein, putative, expressed
LOC_Os07g41060	magenta	0.717469	125.268	45.4562	79.8117	-34.3555	0.717469	0.656284	dihydroflavonol-4-reductase, putative, expressed
LOC_Os08g27250	magenta	0.449982	50.2175	6.56037	43.6571	-37.0967	0.449982	0.104439	expressed protein
LOC_Os01g41550	magenta	0.798047	128.759	70.9615	57.7976	13.1638	0.798047	0.627077	aspartic proteinase, putative, expressed
LOC_Os05g25194	magenta	0.520568	57.3696	15.5953	41.7743	-26.1789	0.520568	0.229311	metal cation transporter, putative, expressed
LOC_Os03g63700	magenta	0.796773	217.602	71.2686	146.333	-75.0644	0.796773	0.493956	AIG2-like family domain containing protein, expressed
LOC_Os02g49920	magenta	0.97097	368.632	206.593	162.039	44.5544	0.97097	0.720378	3-ketoacyl-CoA synthase, putative, expressed
LOC_Os07g26520	magenta	0.723587	132.139	42.319	89.8203	-47.5013	0.723587	0.372269	expressed protein
LOC_Os01g02930	magenta	0.836325	188.398	106.751	81.6467	25.1043	0.836325	0.434278	glycosyltransferase protein, putative, expressed
LOC_Os04g52830	magenta	0.876889	191.802	104.155	87.647	16.508	0.876889	0.574328	OsFBK15 - F-box domain and kelch repeat containing protein, expressed
LOC_Os01g02920	magenta	0.944645	317.781	170.595	147.186	23.4094	0.944645	0.567427	glycosyltransferase protein, putative, expressed
LOC_Os04g15920	magenta	0.710984	233.39	52.2884	181.102	-128.814	0.710984	0.461859	dehydrogenase, putative, expressed
LOC_Os02g57460	magenta	0.767375	137.991	69.1691	68.8221	0.346978	0.767375	0.360217	RING-H2 finger protein ATL5G, putative, expressed
LOC_Os02g44590	magenta	0.823895	263.148	92.2563	170.892	-78.6352	0.823895	0.562535	OsSub20 - Putative Subtilisin homologue, expressed
LOC_Os12g24580	magenta	0.723456	108.452	46.0302	62.4217	-16.3915	0.723456	0.39194	Lg106, putative, expressed
LOC_Os01g26020	magenta	0.795229	436.323	81.5242	354.799	-273.274	0.795229	0.685449	expressed protein
LOC_Os01g26039	magenta	0.68852	116.191	38.4479	77.7429	-39.2951	0.68852	0.369506	expressed protein
LOC_Os07g06900	magenta	0.756481	135.286	44.2163	91.0693	-46.853	0.756481	0.426875	OsFBLD3 - F-box, LRR and FBD domain containing protein, expressed
LOC_Os02g44740	magenta	0.672448	143.132	44.2407	98.891	-54.6503	0.672448	0.486202	expressed protein
LOC_Os07g14610	magenta	0.897228	462.533	151.783	310.75	-158.967	0.897228	0.744036	IAA-amino acid hydrolase ILR1-like 6 precursor, putative, expressed
LOC_Os12g44180	magenta	0.847473	414.99	110.715	304.274	-193.559	0.847473	0.729713	nodulin, putative, expressed
LOC_Os01g61570	magenta	0.770054	175.145	64.23	110.915	-46.6854	0.770054	0.190655	GDSL-like lipase/acylhydrolase, putative, expressed
LOC_Os05g32850	magenta	0.700736	217.03	34.1814	182.848	-148.667	0.700736	0.724981	CBS domain containing protein, expressed
LOC_Os12g44110	magenta	0.753775	232.464	65.6843	166.779	-101.095	0.753775	0.629051	ligA, putative, expressed
LOC_Os07g02440	magenta	0.839889	259.175	102.04	157.134	-55.0942	0.839889	0.492424	peroxidase precursor, putative, expressed
LOC_Os01g02400	magenta	0.534259	44.7941	8.43809	36.356	-27.9179	0.534259	0.280714	protein kinase domain containing protein, expressed
LOC_Os01g14090	magenta	0.675774	115.369	33.2134	82.1553	-48.9419	0.675774	0.155333	kinesin motor domain containing protein, putative, expressed
LOC_Os12g36940	magenta	0.716603	66.2116	30.6784	35.5332	-4.85479	0.716603	0.599786	calmodulin binding protein, putative, expressed
LOC_Os12g24790	magenta	0.575714	37.1162	9.28762	27.8286	-18.541	0.575714	0.502415	retrotransposon protein, putative, LINE subclass, expressed
LOC_Os05g32970	magenta	0.899776	248.116	127.541	120.575	6.96633	0.899776	0.416566	expressed protein
LOC_Os01g61680	magenta	0.648537	131.817	25.5011	106.316	-80.815	0.648537	0.581536	expressed protein
LOC_Os11g47600	magenta	0.887817	208.699	110.896	97.8024	13.094	0.887817	0.655659	glycosyl hydrolase, putative, expressed
LOC_Os01g21630	magenta	0.76167	171.136	62.9983	108.138	-45.1392	0.76167	0.447285	pectinacetylesterase domain containing protein, expressed
LOC_Os02g12580	magenta	0.638741	244.652	23.4575	221.195	-197.738	0.638741	0.646403	OsPP2Ac-3 - Phosphatase 2A isoform 3 belonging to family 1, expressed
LOC_Os12g36880	magenta	0.776192	322.971	80.2054	242.765	-162.56	0.776192	0.646562	pathogenesis-related Bet v I family protein, putative, expressed
LOC_Os03g18820	magenta	0.798473	268.273	79.5192	188.754	-109.235	0.798473	0.2556	glycosyltransferase, putative, expressed
LOC_Os11g28530	magenta	0.725354	190.368	54.8938	135.475	-80.5809	0.725354	0.657242	terpene synthase, putative, expressed
LOC_Os04g35750	magenta	0.772708	235.586	75.2482	160.338	-85.0896	0.772708	0.674247	expressed protein
LOC_Os01g61880	magenta	0.814944	187.424	87.6553	99.7684	-12.1132	0.814944	0.31575	respiratory burst oxidase, putative, expressed
LOC_Os10g36170	magenta	0.95909	403.427	191.534	211.893	-20.3592	0.95909	0.70582	LTPL160 - Protease inhibitor/seed storage/LTP family protein precursor, expressed
LOC_Os09g36080	magenta	0.752174	158.703	51.93	106.773	-54.843	0.752174	0.516773	cytochrome P450, putative, expressed
LOC_Os09g36060	magenta	0.916907	274.37	148.703	125.667	23.0352	0.916907	0.580604	endoglucanase, putative, expressed
LOC_Os01g14590	magenta	0.751703	127.009	63.0519	63.9573	-0.905397	0.751703	0.567519	pathogen-related protein, putative, expressed
LOC_Os01g70100	magenta	0.566274	76.9809	12.1487	64.8322	-52.6835	0.566274	0.473139	zinc finger DHHC domain-containing protein, putative, expressed
LOC_Os09g16980	magenta	0.782976	175.364	65.8695	109.494	-43.6246	0.782976	0.284997	OsWAK86 - OsWAK pseudogene, expressed
LOC_Os11g12810	magenta	0.84094	191.625	89.6827	101.942	-12.259	0.84094	0.69699	sucrose-phosphate synthase, putative, expressed
LOC_Os05g32420	magenta	0.854392	360.623	111.96	248.663	-136.703	0.854392	0.728009	expressed protein
LOC_Os08g31950	magenta	0.91222	402.877	142.587	260.29	-117.703	0.91222	0.81311	expressed protein
LOC_Os03g12840	magenta	0.78386	261.275	62.5647	198.71	-136.146	0.78386	0.649208	Inositol 1, 3, 4-trisphosphate 5/6-kinase, putative, expressed
LOC_Os03g55240	magenta	0.967917	373.509	202.917	170.593	32.3242	0.967917	0.73178	cytochrome P450, putative, expressed
LOC_Os03g06600	magenta	0.59958	90.7851	17.3003	73.4848	-56.1845	0.59958	0.209675	expressed protein
LOC_Os08g36040	magenta	0.908074	308.916	145.691	163.225	-17.5346	0.908074	0.593865	plant viral response family protein, putative, expressed
LOC_Os01g70000	magenta	0.609446	41.4603	11.9685	29.4918	-17.5233	0.609446	0.459736	expressed protein
LOC_Os04g23130	magenta	0.391147	9.85642	1.69325	8.16316	-6.46991	0.391147	0.11354	expressed protein
LOC_Os02g49420	magenta	0.891461	244.331	119.976	124.355	-4.37916	0.891461	0.588608	fasciclin-like arabinogalactan precursor protein, putative, expressed
LOC_Os10g20090	magenta	0.823778	175.918	91.9598	83.9579	8.00187	0.823778	0.389809	CSLH1 - cellulose synthase-like family H, expressed
LOC_Os02g20540	magenta	0.755152	100.939	47.6574	53.2817	-5.62428	0.755152	0.448375	fasciclin domain containing protein, expressed
LOC_Os03g55040	magenta	0.92932	280.563	161.057	119.505	41.552	0.92932	0.546238	UDP-glucoronosyl and UDP-glucosyl transferase domain containing protein, expressed
LOC_Os03g55030	magenta	0.945331	345.036	181.693	163.343	18.3498	0.945331	0.660018	UDP-glucoronosyl and UDP-glucosyl transferase domain containing protein, expressed
LOC_Os03g55034	magenta	0.866799	219.09	106.618	112.472	-5.85482	0.866799	0.628809	expressed protein
LOC_Os03g24380	magenta	0.6032	56.0976	22.2262	33.8714	-11.6451	0.6032	0.281719	glutathione peroxidase domain containing protein, expressed
LOC_Os04g41680	magenta	0.838207	524.166	113.465	410.702	-297.237	0.838207	0.879809	CHIT3 - Chitinase family protein precursor, expressed
LOC_Os04g41640	magenta	0.833106	362.512	95.7105	266.801	-171.091	0.833106	0.867866	HEV2 - Hevein family protein precursor, expressed
LOC_Os12g09070	magenta	0.629001	82.9984	16.2543	66.7442	-50.4899	0.629001	0.406748	expressed protein
LOC_Os04g41620	magenta	0.890226	412.157	145.161	266.996	-121.834	0.890226	0.800708	CHIT2 - Chitinase family protein precursor, expressed
LOC_Os01g14630	magenta	0.745448	197.508	54.0769	143.431	-89.3537	0.745448	0.659235	polyprenyl synthetase, putative, expressed
LOC_Os02g49480	magenta	0.618157	57.0875	15.8327	41.2548	-25.4222	0.618157	0.579928	helix-loop-helix DNA-binding domain containing protein, expressed
LOC_Os01g21250	magenta	0.860864	352.798	136.821	215.977	-79.1553	0.860864	0.69592	late embryogenesis abundant protein, putative, expressed
LOC_Os04g27340	magenta	0.789627	154.16	75.0326	79.127	-4.0944	0.789627	0.35507	terpene synthase, putative, expressed
LOC_Os01g61310	magenta	0.589036	43.7038	12.0719	31.6319	-19.56	0.589036	0.530772	DUF640 domain containing protein, putative, expressed
LOC_Os01g65790	magenta	0.696459	94.5045	37.1701	57.3344	-20.1643	0.696459	0.390928	pectinesterase, putative, expressed
LOC_Os02g12710	magenta	0.563461	49.0552	9.08525	39.97	-30.8847	0.563461	0.487828	interferon-related developmental regulator family protein, putative, expressed
LOC_Os08g31700	magenta	0.891339	227.975	127.833	100.142	27.691	0.891339	0.499425	UNE2, putative, expressed
LOC_Os04g41540	magenta	0.685796	221.49	52.1271	169.363	-117.236	0.685796	0.540364	OsCML22 - Calmodulin-related calcium sensor protein, expressed
LOC_Os04g41570	magenta	0.733712	83.5305	42.0599	41.4706	0.589317	0.733712	0.466554	ethylene-responsive protein related, putative, expressed
LOC_Os01g65880	magenta	0.729013	155.127	59.0691	96.0584	-36.9893	0.729013	0.157921	nodulin MtN3 family protein, putative, expressed
LOC_Os04g35130	magenta	0.907436	534.923	155.224	379.699	-224.476	0.907436	0.792517	expressed protein
LOC_Os03g55410	magenta	0.672447	143.488	29.1618	114.326	-85.1643	0.672447	0.535505	peroxidase precursor, putative, expressed
LOC_Os12g12260	magenta	0.685463	87.9727	27.3527	60.62	-33.2673	0.685463	0.373451	diacylglycerol kinase 1, putative, expressed
LOC_Os09g16650	magenta	0.690432	63.7024	31.8507	31.8517	-0.00108406	0.690432	0.511103	legume lectins beta domain containing protein, putative, expressed
LOC_Os01g02100	magenta	0.540559	69.4796	15.3128	54.1668	-38.8539	0.540559	0.0142476	transposon protein, putative, unclassified, expressed
LOC_Os01g70210	magenta	0.704166	143.441	41.2794	102.162	-60.8823	0.704166	0.335318	CRAL/TRIO domain containing protein, expressed
LOC_Os02g12810	magenta	0.681844	247.421	37.2433	210.177	-172.934	0.681844	0.754307	protein kinase domain containing protein, expressed
LOC_Os04g27400	magenta	0.705253	103.244	33.1611	70.0828	-36.9217	0.705253	0.684946	terpene synthase, putative, expressed
LOC_Os01g02160	magenta	0.653245	103.506	24.2035	79.3026	-55.0991	0.653245	0.552049	hydroxyproline-rich glycoprotein family protein, putative, expressed
LOC_Os03g55290	magenta	0.864186	357.536	123.005	234.531	-111.526	0.864186	0.77146	GASR3 - Gibberellin-regulated GASA/GAST/Snakin family protein precursor, expressed
LOC_Os08g31850	magenta	0.794577	178.696	68.5652	110.131	-41.5654	0.794577	0.697081	expressed protein
LOC_Os04g35280	magenta	0.870955	387.492	123.856	263.635	-139.779	0.870955	0.808977	neutral/alkaline invertase, putative, expressed
LOC_Os05g32180	magenta	0.607234	84.4349	14.6933	69.7417	-55.0484	0.607234	0.626177	acetyltransferase, GNAT family, putative, expressed
LOC_Os02g16080	magenta	0.542753	46.1671	13.1719	32.9952	-19.8232	0.542753	0.445551	retrotransposon protein, putative, unclassified, expressed
LOC_Os11g05700	magenta	0.755674	149.726	65.4123	84.3139	-18.9017	0.755674	0.444258	ABC transporter family protein, putative, expressed
LOC_Os09g23084	magenta	0.834759	211.601	94.2102	117.391	-23.1805	0.834759	0.589796	endoglucanase, putative, expressed
LOC_Os04g27670	magenta	0.635198	51.1498	21.7302	29.4196	-7.68946	0.635198	0.576646	terpene synthase family, metal binding domain containing protein, expressed
LOC_Os03g39760	magenta	0.675826	167.331	49.9355	117.395	-67.4596	0.675826	0.566996	cytochrome P450, putative, expressed
LOC_Os03g29614	magenta	0.927921	333.406	162.182	171.224	-9.04193	0.927921	0.788441	myb-like DNA-binding domain containing protein, putative, expressed
LOC_Os01g53470	magenta	0.754176	129.395	49.8935	79.5019	-29.6084	0.754176	0.543879	harpin-induced protein 1 domain containing protein, expressed
LOC_Os06g08610	magenta	0.670557	140.236	40.6191	99.6171	-58.998	0.670557	0.54223	transferase family protein, putative, expressed
LOC_Os11g05810	magenta	0.762131	114.153	45.1695	68.9832	-23.8137	0.762131	0.568802	expressed protein
LOC_Os02g32450	magenta	0.614054	99.9773	26.0469	73.9304	-47.8835	0.614054	0.126555	expressed protein
LOC_Os07g45100	magenta	0.578505	96.5249	20.053	76.4719	-56.4189	0.578505	0.583516	endonuclease/exonuclease/phosphatase family domain containing protein, expressed
LOC_Os07g45170	magenta	0.584191	68.6398	18.0555	50.5844	-32.5289	0.584191	0.159798	protein phosphatase 2C, putative, expressed
LOC_Os06g19400	magenta	0.631571	123.54	31.4174	92.1227	-60.7053	0.631571	0.319738	GRAM and C2 domains containing protein, putative, expressed
LOC_Os07g45080	magenta	0.793258	205.374	75.4021	129.972	-54.5695	0.793258	0.407568	expressed protein
LOC_Os01g66610	magenta	0.856114	269.374	116.547	152.827	-36.2805	0.856114	0.517255	serine/threonine-protein kinase receptor precursor, putative, expressed
LOC_Os03g29930	magenta	0.836586	170.134	82.8183	87.3155	-4.49721	0.836586	0.701913	expressed protein
LOC_Os06g08220	magenta	0.689093	76.5846	30.4567	46.128	-15.6713	0.689093	0.441072	expressed protein
LOC_Os07g40986	magenta	0.71888	121.199	41.496	79.7033	-38.2073	0.71888	0.636407	NAD dependent epimerase/dehydratase family protein, putative, expressed
LOC_Os01g10320	magenta	0.832581	193.233	85.6736	107.559	-21.8859	0.832581	0.341968	class III HD-Zip protein 8, putative, expressed
LOC_Os01g66544	magenta	0.826442	190.332	83.263	107.069	-23.8059	0.826442	0.760402	expressed protein
LOC_Os01g66510	magenta	0.936496	340.813	162.717	178.096	-15.3791	0.936496	0.692887	MLO domain containing protein, putative, expressed
LOC_Os02g11980	magenta	0.695093	58.6052	27.3209	31.2843	-3.96336	0.695093	0.548674	receptor-like protein kinase precursor, putative, expressed
LOC_Os09g28650	magenta	0.74896	198.999	60.1257	138.873	-78.7471	0.74896	0.461131	gibberellin receptor, putative, expressed
LOC_Os04g41930	magenta	0.552331	35.6212	10.3158	25.3055	-14.9897	0.552331	0.291847	expressed protein
LOC_Os07g15350	magenta	0.550474	56.4729	9.69652	46.7763	-37.0798	0.550474	0.417087	transposon protein, putative, CACTA, En/Spm sub-class, expressed
LOC_Os10g42820	magenta	0.798191	143.351	79.0509	64.3004	14.7505	0.798191	0.345299	early-responsive to dehydration protein-related, putative, expressed
LOC_Os09g28640	magenta	0.734767	159.707	53.6617	106.046	-52.3842	0.734767	0.440968	gibberellin receptor GID1L2, putative, expressed
LOC_Os06g42560	magenta	0.838232	345.583	95.3566	250.227	-154.87	0.838232	0.606847	tryptophan synthase beta chain 2, putative, expressed
LOC_Os01g03180	magenta	0.833934	182.254	99.0441	83.2098	15.8343	0.833934	0.458427	retrotransposon protein, putative, unclassified, expressed
LOC_Os01g74152	magenta	0.71954	152.707	36.8987	115.809	-78.9099	0.71954	0.539965	haloacid dehalogenase-like hydrolase family protein, putative, expressed
LOC_Os03g43350	magenta	0.754645	588.143	69.5358	518.607	-449.071	0.754645	0.701713	expressed protein
LOC_Os10g20880	magenta	0.680733	78.7115	28.2793	50.4322	-22.1529	0.680733	0.295426	LTPL136 - Protease inhibitor/seed storage/LTP family protein precursor, putative, expressed
LOC_Os05g44810	magenta	0.676245	101.394	33.5984	67.7959	-34.1975	0.676245	0.218977	OsIAA18 - Auxin-responsive Aux/IAA gene family member, expressed
LOC_Os02g21040	magenta	0.785324	145.423	60.2385	85.1849	-24.9465	0.785324	0.639855	aspartic proteinase nepenthesin precursor, putative, expressed
LOC_Os02g16540	magenta	0.595046	40.0252	13.2353	26.79	-13.5547	0.595046	0.267243	WRKY39, expressed
LOC_Os12g05540	magenta	0.654039	78.9832	21.7673	57.2159	-35.4486	0.654039	0.650566	Ser/Thr protein phosphatase family protein, putative, expressed
LOC_Os10g17380	magenta	0.709633	116.795	43.3202	73.4751	-30.1549	0.709633	0.544604	retrotransposon protein, putative, unclassified
LOC_Os04g03164	magenta	0.598296	58.204	16.2536	41.9504	-25.6968	0.598296	0.55137	expressed protein
LOC_Os02g32080	magenta	0.817972	421.361	97.1346	324.226	-227.092	0.817972	0.634038	LEML2 - Anther-specific LEM1 family protein precursor, expressed
LOC_Os01g15010	magenta	0.553629	51.0518	16.8901	34.1618	-17.2717	0.553629	0.291012	miro, putative, expressed
LOC_Os02g32009	magenta	0.578499	49.2039	13.5776	35.6263	-22.0487	0.578499	0.154153	expressed protein
LOC_Os07g45570	magenta	0.602891	50.9476	14.9813	35.9663	-20.985	0.602891	0.271242	expressed protein
LOC_Os05g49940	magenta	0.731125	187.009	53.3047	133.704	-80.3997	0.731125	0.563974	expressed protein
LOC_Os08g32310	magenta	0.831921	305.2	83.5507	221.649	-138.099	0.831921	0.750709	expressed protein
LOC_Os01g37000	magenta	0.567902	40.3054	14.3643	25.941	-11.5767	0.567902	0.557652	carboxyl-terminal peptidase, putative, expressed
LOC_Os07g01460	magenta	0.598027	91.1505	17.2551	73.8954	-56.6403	0.598027	0.123628	expressed protein
LOC_Os03g43010	magenta	0.49879	73.5375	16.1431	57.3944	-41.2513	0.49879	0.316158	expressed protein
LOC_Os05g03500	magenta	0.511247	48.6132	9.29094	39.3223	-30.0313	0.511247	0.52256	expressed protein
LOC_Os10g17650	magenta	0.88964	557.672	147.799	409.872	-262.073	0.88964	0.813672	Os10bglu34 - beta-glucosidase homologue, similar to Os3bglu6, expressed
LOC_Os05g40384	magenta	0.949287	320.747	181.533	139.214	42.3195	0.949287	0.644817	cytochrome P450, putative, expressed
LOC_Os06g47360	magenta	0.877885	219.819	123.302	96.5177	26.784	0.877885	0.53557	beta-expansin precursor, putative, expressed
LOC_Os01g10940	magenta	0.631247	51.4739	18.7449	32.729	-13.9842	0.631247	0.541488	S-adenosylmethionine synthetase 2, putative, expressed
LOC_Os09g23660	magenta	0.764495	254.749	79.1335	175.616	-96.4821	0.764495	0.515516	ZIM motif family protein, expressed
LOC_Os01g10850	magenta	0.690056	83.1551	27.6767	55.4784	-27.8017	0.690056	0.490883	peroxidase precursor, putative, expressed
LOC_Os06g47200	magenta	0.911011	343.429	146.266	197.164	-50.8982	0.911011	0.546289	LTPL85 - Protease inhibitor/seed storage/LTP family protein precursor, expressed
LOC_Os06g47220	magenta	0.572871	75.1147	19.9457	55.1691	-35.2234	0.572871	0.490295	expressed protein
LOC_Os02g58160	magenta	0.917468	243.999	146.918	97.081	49.8368	0.917468	0.654948	expressed protein
LOC_Os04g48530	magenta	0.783281	222.183	85.0584	137.124	-52.0658	0.783281	0.539992	C4-dicarboxylate transporter/malic acid transport protein domain containing protein, expressed
LOC_Os02g58170	magenta	0.606026	107.975	36.3982	71.5771	-35.1789	0.606026	0.255316	transposon protein, putative, unclassified, expressed
LOC_Os01g58670	magenta	0.820786	186.686	81.3646	105.322	-23.9571	0.820786	0.573406	expressed protein
LOC_Os11g09684	magenta	0.656503	59.6723	22.4564	37.2159	-14.7594	0.656503	0.598917	expressed protein
LOC_Os06g42030	magenta	0.966528	338.002	190.934	147.068	43.8657	0.966528	0.675027	potassium transporter, putative, expressed
LOC_Os01g42730	magenta	0.725536	349.253	53.6856	295.568	-241.882	0.725536	0.685623	GDSL-like lipase/acylhydrolase, putative, expressed
LOC_Os04g56500	magenta	0.745961	107.338	36.8611	70.477	-33.6159	0.745961	0.557074	expressed protein
LOC_Os03g59152	magenta	0.789034	381.668	80.763	300.905	-220.142	0.789034	0.751772	lethal leaf spot 1, putative, expressed
LOC_Os07g38250	magenta	0.858279	266.939	103.41	163.529	-60.1194	0.858279	0.6485	expressed protein
LOC_Os04g39980	magenta	0.896558	464.494	148.15	316.344	-168.195	0.896558	0.816353	gibberellin 20 oxidase 2, putative, expressed
LOC_Os01g37710	magenta	0.578976	46.9082	11.2387	35.6695	-24.4308	0.578976	0.320417	expressed protein
[truncated: 56 more rows]

## Sheet: All gene of blue
GeneID	module	geneModuleMembership	kTotal	kWithin	kOut	kDiff	KME	GS
[truncated: 4,929 more rows]

[truncated: 2 more sheets: All gene of yellow, hub genes]
