# Supplementary material for: Transcriptome Analysis Reveals Photoperiod-Associated Genes Expressed in Rice Anthers
Source: Front Plant Sci. 2021 Feb 26;12:621561. doi: 10.3389/fpls.2021.621561 (PMC7953911; doi:10.3389/fpls.2021.621561)
Supplement: Supplementary file 9 [file Data_Sheet_7.XLSX]

## Sheet: Turquoise_GO
GO_acc	term_type	Term	queryitem	querytotal	bgitem	bgtotal	pvalue	FDR	entries
GO:0006810	P	transport	344	3060	1638	24075	3.7e-17	3.5e-15	// LOC_Os01g12470 // LOC_Os03g02050 // LOC_Os02g58660 // LOC_Os04g42420 // LOC_Os02g31940 // LOC_Os07g03910 // LOC_Os11g24450 // LOC_Os12g06270 // LOC_Os09g39680 // LOC_Os01g19770 // LOC_Os01g51120 // LOC_Os12g06570 // LOC_Os04g52390 // LOC_Os12g33020 // LOC_Os09g26160 // LOC_Os04g01150 // LOC_Os03g41070 // LOC_Os03g60530 // LOC_Os01g58010 // LOC_Os01g45990 // LOC_Os02g02450 // LOC_Os02g07870 // …
GO:0051234	P	establishment of localization	344	3060	1638	24075	3.7e-17	3.5e-15	// LOC_Os01g12470 // LOC_Os03g02050 // LOC_Os02g58660 // LOC_Os04g42420 // LOC_Os02g31940 // LOC_Os07g03910 // LOC_Os11g24450 // LOC_Os12g06270 // LOC_Os09g39680 // LOC_Os01g19770 // LOC_Os01g51120 // LOC_Os12g06570 // LOC_Os04g52390 // LOC_Os12g33020 // LOC_Os09g26160 // LOC_Os04g01150 // LOC_Os03g41070 // LOC_Os03g60530 // LOC_Os01g58010 // LOC_Os01g45990 // LOC_Os02g02450 // LOC_Os02g07870 // …
GO:0051179	P	localization	346	3060	1651	24075	3.9e-17	3.5e-15	// LOC_Os01g12470 // LOC_Os03g02050 // LOC_Os02g58660 // LOC_Os04g42420 // LOC_Os02g31940 // LOC_Os07g03910 // LOC_Os11g24450 // LOC_Os12g06270 // LOC_Os09g39680 // LOC_Os01g19770 // LOC_Os01g51120 // LOC_Os12g06570 // LOC_Os04g52390 // LOC_Os12g33020 // LOC_Os09g26160 // LOC_Os04g01150 // LOC_Os03g41070 // LOC_Os03g60530 // LOC_Os01g58010 // LOC_Os01g45990 // LOC_Os02g02450 // LOC_Os02g07870 // …
GO:0005975	P	carbohydrate metabolic process	175	3060	833	24075	3.2e-09	2.2e-07	// LOC_Os08g01600 // LOC_Os01g33960 // LOC_Os12g41780 // LOC_Os03g56869 // LOC_Os05g46520 // LOC_Os07g36700 // LOC_Os10g08022 // LOC_Os05g04690 // LOC_Os07g47120 // LOC_Os01g67364 // LOC_Os08g25710 // LOC_Os02g32660 // LOC_Os04g40874 // LOC_Os04g51510 // LOC_Os10g40555 // LOC_Os07g41150 // LOC_Os10g21110 // LOC_Os03g18520 // LOC_Os04g41970 // LOC_Os01g51754 // LOC_Os06g22980 // LOC_Os04g53310 // …
GO:0006091	P	generation of precursor metabolites and energy	58	3060	243	24075	3.1e-05	0.0017	// LOC_Os06g39740 // LOC_Os01g58010 // LOC_Os06g04510 // LOC_Os01g12260 // LOC_Os07g49520 // LOC_Os04g55040 // LOC_Os08g25734 // LOC_Os10g08022 // LOC_Os07g13980 // LOC_Os03g59220 // LOC_Os01g49190 // LOC_Os05g44760 // LOC_Os10g21238 // LOC_Os06g43850 // LOC_Os01g41610 // LOC_Os03g50540 // LOC_Os01g16900 // LOC_Os02g50620 // LOC_Os05g44922 // LOC_Os04g32330 // LOC_Os10g21324 // LOC_Os06g13810 // …
GO:0006629	P	lipid metabolic process	100	3060	528	24075	0.00024	0.011	// LOC_Os08g40590 // LOC_Os05g07880 // LOC_Os05g14580 // LOC_Os02g50690 // LOC_Os04g48800 // LOC_Os03g52010 // LOC_Os02g48560 // LOC_Os11g37900 // LOC_Os11g04840 // LOC_Os05g06300 // LOC_Os01g46250 // LOC_Os10g05088 // LOC_Os07g49330 // LOC_Os03g03370 // LOC_Os03g49770 // LOC_Os03g62410 // LOC_Os11g48020 // LOC_Os04g41200 // LOC_Os02g58500 // LOC_Os02g37590 // LOC_Os07g39270 // LOC_Os03g28140 // …
GO:0009056	P	catabolic process	82	3060	433	24075	0.00082	0.032	// LOC_Os12g01730 // LOC_Os05g49070 // LOC_Os04g40310 // LOC_Os01g39260 // LOC_Os07g49520 // LOC_Os02g58500 // LOC_Os01g70170 // LOC_Os01g44330 // LOC_Os02g10070 // LOC_Os10g08022 // LOC_Os05g04690 // LOC_Os07g47120 // LOC_Os06g45670 // LOC_Os11g48030 // LOC_Os03g18640 // LOC_Os06g15360 // LOC_Os06g04510 // LOC_Os06g04070 // LOC_Os07g22680 // LOC_Os05g44760 // LOC_Os03g49250 // LOC_Os01g13550 // …
GO:0007165	P	signal transduction	50	3060	240	24075	0.0015	0.051	// LOC_Os06g02130 // LOC_Os03g05280 // LOC_Os11g05540 // LOC_Os02g58730 // LOC_Os01g08310 // LOC_Os03g17540 // LOC_Os04g02690 // LOC_Os10g23100 // LOC_Os02g08140 // LOC_Os08g43380 // LOC_Os05g31720 // LOC_Os08g25010 // LOC_Os04g23890 // LOC_Os06g35160 // LOC_Os02g03610 // LOC_Os08g42530 // LOC_Os03g15180 // LOC_Os03g47790 // LOC_Os03g18010 // LOC_Os05g01490 // LOC_Os02g02840 // LOC_Os02g37420 // …
GO:0065008	P	regulation of biological quality	38	3060	176	24075	0.0031	0.093	// LOC_Os02g09940 // LOC_Os01g23610 // LOC_Os01g22520 // LOC_Os07g47100 // LOC_Os05g28530 // LOC_Os01g47760 // LOC_Os10g08879 // LOC_Os10g40130 // LOC_Os01g48420 // LOC_Os09g30446 // LOC_Os09g38670 // LOC_Os04g33680 // LOC_Os08g29110 // LOC_Os03g24030 // LOC_Os01g34620 // LOC_Os06g09610 // LOC_Os08g03440 // LOC_Os12g07650 // LOC_Os11g42790 // LOC_Os03g44650 // LOC_Os05g06750 // LOC_Os10g34230 // …
GO:0009628	P	response to abiotic stimulus	20	3060	74	24075	0.0037	0.099	// LOC_Os01g43530 // LOC_Os11g02620 // LOC_Os02g44870 // LOC_Os03g55830 // LOC_Os04g57800 // LOC_Os03g41460 // LOC_Os03g55600 // LOC_Os03g41350 // LOC_Os03g62620 // LOC_Os05g35770 // LOC_Os05g26926 // LOC_Os01g12580 // LOC_Os05g35760 // LOC_Os01g57230 // LOC_Os02g56040 // LOC_Os07g17120 // LOC_Os04g54400 // LOC_Os04g46390 // LOC_Os01g50700 // LOC_Os05g26902
GO:0042592	P	homeostatic process	32	3060	147	24075	0.0056	0.14	// LOC_Os02g09940 // LOC_Os01g23610 // LOC_Os01g22520 // LOC_Os07g47100 // LOC_Os05g28530 // LOC_Os01g47760 // LOC_Os10g08879 // LOC_Os01g48420 // LOC_Os09g30446 // LOC_Os09g38670 // LOC_Os04g33680 // LOC_Os08g29110 // LOC_Os03g24030 // LOC_Os01g34620 // LOC_Os06g09610 // LOC_Os12g07650 // LOC_Os11g42790 // LOC_Os03g44650 // LOC_Os05g06750 // LOC_Os04g53740 // LOC_Os01g07376 // LOC_Os01g09830 // …
GO:0006519	P	cellular amino acid and derivative metabolic process	70	3060	391	24075	0.0061	0.14	// LOC_Os12g01730 // LOC_Os12g13320 // LOC_Os05g07880 // LOC_Os03g12890 // LOC_Os03g50510 // LOC_Os01g44330 // LOC_Os06g44460 // LOC_Os04g42090 // LOC_Os01g73450 // LOC_Os06g45670 // LOC_Os04g42095 // LOC_Os03g18640 // LOC_Os03g11660 // LOC_Os04g32650 // LOC_Os02g20360 // LOC_Os12g31820 // LOC_Os07g32774 // LOC_Os03g63490 // LOC_Os11g02440 // LOC_Os02g39790 // LOC_Os06g04070 // LOC_Os12g15680 // …
GO:0019748	P	secondary metabolic process	17	3060	64	24075	0.0081	0.17	// LOC_Os11g48060 // LOC_Os12g01730 // LOC_Os03g56869 // LOC_Os12g15680 // LOC_Os07g07260 // LOC_Os06g46372 // LOC_Os01g70170 // LOC_Os01g44330 // LOC_Os01g58790 // LOC_Os07g41280 // LOC_Os06g01260 // LOC_Os11g02440 // LOC_Os01g62490 // LOC_Os03g18640 // LOC_Os02g09750 // LOC_Os09g35970 // LOC_Os05g49070
GO:0043412	P	macromolecule modification	291	3060	1979	24075	0.0092	0.18	// LOC_Os01g10900 // LOC_Os08g29160 // LOC_Os02g05820 // LOC_Os03g12570 // LOC_Os12g41780 // LOC_Os11g13860 // LOC_Os02g36770 // LOC_Os08g02440 // LOC_Os06g13090 // LOC_Os02g58520 // LOC_Os12g30150 // LOC_Os01g54100 // LOC_Os04g15560 // LOC_Os04g34330 // LOC_Os10g26520 // LOC_Os03g37120 // LOC_Os05g38290 // LOC_Os08g37570 // LOC_Os11g02180 // LOC_Os04g23890 // LOC_Os03g59390 // LOC_Os06g09230 // …
GO:0006464	P	protein modification process	283	3060	1929	24075	0.011	0.2	// LOC_Os01g10900 // LOC_Os08g29160 // LOC_Os02g05820 // LOC_Os03g12570 // LOC_Os12g41780 // LOC_Os11g13860 // LOC_Os02g36770 // LOC_Os08g02440 // LOC_Os06g13090 // LOC_Os02g58520 // LOC_Os12g30150 // LOC_Os01g54100 // LOC_Os04g15560 // LOC_Os04g34330 // LOC_Os10g26520 // LOC_Os03g37120 // LOC_Os05g38290 // LOC_Os08g37570 // LOC_Os11g02180 // LOC_Os04g23890 // LOC_Os03g59390 // LOC_Os06g09230 // …
GO:0019725	P	cellular homeostasis	29	3060	140	24075	0.014	0.24	// LOC_Os02g09940 // LOC_Os01g23610 // LOC_Os01g22520 // LOC_Os05g28530 // LOC_Os01g47760 // LOC_Os10g08879 // LOC_Os01g48420 // LOC_Os09g38670 // LOC_Os04g33680 // LOC_Os08g29110 // LOC_Os03g24030 // LOC_Os01g34620 // LOC_Os06g09610 // LOC_Os12g07650 // LOC_Os04g54860 // LOC_Os03g44650 // LOC_Os05g06750 // LOC_Os04g53740 // LOC_Os01g07376 // LOC_Os01g09830 // LOC_Os05g40190 // LOC_Os12g35640 // …
GO:0065007	P	biological regulation	304	3060	2125	24075	0.024	0.39	// LOC_Os02g09940 // LOC_Os08g01090 // LOC_Os04g47890 // LOC_Os03g12570 // LOC_Os02g20850 // LOC_Os11g05540 // LOC_Os06g11970 // LOC_Os05g40190 // LOC_Os08g38590 // LOC_Os04g32960 // LOC_Os03g17540 // LOC_Os08g42530 // LOC_Os02g45200 // LOC_Os02g36924 // LOC_Os01g74540 // LOC_Os01g62660 // LOC_Os06g08290 // LOC_Os09g30250 // LOC_Os01g55150 // LOC_Os05g42180 // LOC_Os01g68370 // LOC_Os08g25010 // …
GO:0044267	P	cellular protein metabolic process	401	3060	2877	24075	0.036	0.53	// LOC_Os12g41780 // LOC_Os11g13860 // LOC_Os08g02440 // LOC_Os01g54350 // LOC_Os04g15560 // LOC_Os04g23890 // LOC_Os08g01859 // LOC_Os01g59730 // LOC_Os10g33650 // LOC_Os11g36150 // LOC_Os10g18260 // LOC_Os11g31650 // LOC_Os11g36090 // LOC_Os02g12670 // LOC_Os03g59720 // LOC_Os02g01230 // LOC_Os03g41460 // LOC_Os08g33920 // LOC_Os04g38910 // LOC_Os02g02140 // LOC_Os03g60100 // LOC_Os02g35760 // …
GO:0050789	P	regulation of biological process	286	3060	2027	24075	0.046	0.59	// LOC_Os02g09940 // LOC_Os08g01090 // LOC_Os04g47890 // LOC_Os03g12570 // LOC_Os02g20850 // LOC_Os11g05540 // LOC_Os06g11970 // LOC_Os05g40190 // LOC_Os08g38590 // LOC_Os04g32960 // LOC_Os03g17540 // LOC_Os08g42530 // LOC_Os02g45200 // LOC_Os02g36924 // LOC_Os01g74540 // LOC_Os01g62660 // LOC_Os06g08290 // LOC_Os01g55150 // LOC_Os05g42180 // LOC_Os01g68370 // LOC_Os08g25010 // LOC_Os11g38040 // …
GO:0040029	P	regulation of gene expression, epigenetic	5	3060	13	24075	0.044	0.59	// LOC_Os01g42630 // LOC_Os03g58400 // LOC_Os03g12570 // LOC_Os12g07950 // LOC_Os04g32960
GO:0050794	P	regulation of cellular process	277	3060	1955	24075	0.043	0.59	// LOC_Os02g09940 // LOC_Os08g01090 // LOC_Os04g47890 // LOC_Os02g20850 // LOC_Os11g05540 // LOC_Os06g11970 // LOC_Os05g40190 // LOC_Os08g38590 // LOC_Os03g17540 // LOC_Os08g42530 // LOC_Os02g45200 // LOC_Os02g36924 // LOC_Os01g74540 // LOC_Os01g62660 // LOC_Os06g08290 // LOC_Os01g55150 // LOC_Os05g42180 // LOC_Os01g68370 // LOC_Os08g25010 // LOC_Os11g38040 // LOC_Os04g23890 // LOC_Os10g23090 // …
GO:0016265	P	death	46	3060	544	24075	1	1	// LOC_Os05g09050 // LOC_Os08g43270 // LOC_Os04g46300 // LOC_Os12g10340 // LOC_Os08g28540 // LOC_Os04g12830 // LOC_Os08g14810 // LOC_Os01g23380 // LOC_Os08g43010 // LOC_Os07g01530 // LOC_Os10g03570 // LOC_Os06g48520 // LOC_Os04g21890 // LOC_Os11g06234 // LOC_Os06g06390 // LOC_Os07g02630 // LOC_Os11g42090 // LOC_Os12g10390 // LOC_Os11g07912 // LOC_Os01g25760 // LOC_Os05g40150 // LOC_Os12g37740 // …
GO:0019222	P	regulation of metabolic process	209	3060	1664	24075	0.58	1	// LOC_Os04g47890 // LOC_Os03g12570 // LOC_Os09g38010 // LOC_Os04g54900 // LOC_Os04g47059 // LOC_Os08g38590 // LOC_Os04g32960 // LOC_Os04g57720 // LOC_Os02g45200 // LOC_Os02g36924 // LOC_Os01g74540 // LOC_Os01g62660 // LOC_Os06g08290 // LOC_Os01g55150 // LOC_Os05g42180 // LOC_Os01g68370 // LOC_Os05g48850 // LOC_Os04g23890 // LOC_Os05g51850 // LOC_Os02g15760 // LOC_Os09g30400 // LOC_Os07g05010 // …
GO:0044249	P	cellular biosynthetic process	512	3060	5890	24075	1	1	// LOC_Os01g33960 // LOC_Os12g41780 // LOC_Os01g11350 // LOC_Os08g38590 // LOC_Os11g14460 // LOC_Os12g27410 // LOC_Os03g14990 // LOC_Os01g62820 // LOC_Os04g23890 // LOC_Os02g50350 // LOC_Os04g33300 // LOC_Os01g59730 // LOC_Os09g32260 // LOC_Os02g35660 // LOC_Os11g31650 // LOC_Os09g24800 // LOC_Os03g59720 // LOC_Os01g48700 // LOC_Os04g57410 // LOC_Os03g03370 // LOC_Os01g01710 // LOC_Os07g36700 // …
GO:0006807	P	nitrogen compound metabolic process	534	3060	7073	24075	1	1	// LOC_Os04g47059 // LOC_Os08g38590 // LOC_Os04g01530 // LOC_Os05g04690 // LOC_Os12g27410 // LOC_Os03g14990 // LOC_Os01g62820 // LOC_Os04g23890 // LOC_Os02g50350 // LOC_Os04g37460 // LOC_Os04g33300 // LOC_Os12g06270 // LOC_Os02g35660 // LOC_Os06g44320 // LOC_Os09g24800 // LOC_Os01g48700 // LOC_Os04g57410 // LOC_Os05g18740 // LOC_Os04g38950 // LOC_Os12g07910 // LOC_Os09g24660 // LOC_Os09g37320 // …
GO:0034645	P	cellular macromolecule biosynthetic process	365	3060	5248	24075	1	1	// LOC_Os01g33960 // LOC_Os12g41780 // LOC_Os08g38590 // LOC_Os12g27410 // LOC_Os01g62820 // LOC_Os04g23890 // LOC_Os08g01859 // LOC_Os01g59730 // LOC_Os09g32260 // LOC_Os02g35660 // LOC_Os11g31650 // LOC_Os09g24800 // LOC_Os03g59720 // LOC_Os01g48700 // LOC_Os07g36700 // LOC_Os09g24660 // LOC_Os08g33920 // LOC_Os03g60100 // LOC_Os09g37320 // LOC_Os04g29870 // LOC_Os02g45770 // LOC_Os04g45400 // …
GO:0008219	P	cell death	46	3060	544	24075	1	1	// LOC_Os05g09050 // LOC_Os08g43270 // LOC_Os04g46300 // LOC_Os12g10340 // LOC_Os08g28540 // LOC_Os04g12830 // LOC_Os08g14810 // LOC_Os01g23380 // LOC_Os08g43010 // LOC_Os07g01530 // LOC_Os10g03570 // LOC_Os06g48520 // LOC_Os04g21890 // LOC_Os11g06234 // LOC_Os06g06390 // LOC_Os07g02630 // LOC_Os11g42090 // LOC_Os12g10390 // LOC_Os11g07912 // LOC_Os01g25760 // LOC_Os05g40150 // LOC_Os12g37740 // …
GO:0007049	P	cell cycle	7	3060	30	24075	0.12	1	// LOC_Os11g19220 // LOC_Os11g04954 // LOC_Os04g40940 // LOC_Os09g32930 // LOC_Os03g10570 // LOC_Os12g04980 // LOC_Os12g41350
GO:0009719	P	response to endogenous stimulus	6	3060	30	24075	0.21	1	// LOC_Os07g15540 // LOC_Os05g43920 // LOC_Os07g08520 // LOC_Os01g54990 // LOC_Os10g33940 // LOC_Os01g48060
GO:0000003	P	reproduction	21	3060	133	24075	0.21	1	// LOC_Os09g37780 // LOC_Os01g12410 // LOC_Os09g37834 // LOC_Os01g12430 // LOC_Os10g40090 // LOC_Os04g42740 // LOC_Os03g01630 // LOC_Os03g01650 // LOC_Os10g40710 // LOC_Os05g07080 // LOC_Os03g01610 // LOC_Os03g01260 // LOC_Os03g01640 // LOC_Os07g36544 // LOC_Os12g07800 // LOC_Os03g61310 // LOC_Os04g07200 // LOC_Os01g12420 // LOC_Os03g30890 // LOC_Os09g37790 // LOC_Os04g34330
GO:0044260	P	cellular macromolecule metabolic process	838	3060	9350	24075	1	1	// LOC_Os01g33960 // LOC_Os12g41780 // LOC_Os04g47059 // LOC_Os11g13860 // LOC_Os08g38590 // LOC_Os08g02440 // LOC_Os10g08022 // LOC_Os01g54350 // LOC_Os04g15560 // LOC_Os01g62820 // LOC_Os04g23890 // LOC_Os06g04610 // LOC_Os08g01859 // LOC_Os01g59730 // LOC_Os09g32260 // LOC_Os11g36150 // LOC_Os10g18260 // LOC_Os11g31650 // LOC_Os11g36090 // LOC_Os02g12670 // LOC_Os09g24800 // LOC_Os03g59720 // …
GO:0016043	P	cellular component organization	79	3060	1240	24075	1	1	// LOC_Os03g14510 // LOC_Os10g17360 // LOC_Os03g12570 // LOC_Os03g11970 // LOC_Os03g32590 // LOC_Os02g07900 // LOC_Os03g53190 // LOC_Os05g35160 // LOC_Os02g20860 // LOC_Os03g17084 // LOC_Os08g22660 // LOC_Os01g06010 // LOC_Os10g29660 // LOC_Os01g65860 // LOC_Os03g10570 // LOC_Os08g34780 // LOC_Os11g19220 // LOC_Os12g41350 // LOC_Os07g24240 // LOC_Os05g02050 // LOC_Os08g17820 // LOC_Os01g62820 // …
GO:0015979	P	photosynthesis	6	3060	115	24075	1	1	// LOC_Os08g39430 // LOC_Os04g44200 // LOC_Os10g21192 // LOC_Os07g17390 // LOC_Os04g35530 // LOC_Os02g42570
GO:0010467	P	gene expression	307	3060	2424	24075	0.53	1	// LOC_Os08g01090 // LOC_Os04g47890 // LOC_Os01g19840 // LOC_Os03g12570 // LOC_Os09g38010 // LOC_Os04g54900 // LOC_Os10g38238 // LOC_Os08g38590 // LOC_Os04g32960 // LOC_Os03g32590 // LOC_Os04g38750 // LOC_Os04g57720 // LOC_Os02g45200 // LOC_Os02g36924 // LOC_Os07g48260 // LOC_Os01g74540 // LOC_Os06g07190 // LOC_Os06g08290 // LOC_Os01g55150 // LOC_Os05g42180 // LOC_Os07g36250 // LOC_Os01g68370 // …
GO:0009856	P	pollination	14	3060	114	24075	0.59	1	// LOC_Os09g37780 // LOC_Os01g12410 // LOC_Os09g37834 // LOC_Os01g12430 // LOC_Os04g42740 // LOC_Os05g07080 // LOC_Os07g36544 // LOC_Os12g07800 // LOC_Os03g61310 // LOC_Os04g07200 // LOC_Os01g12420 // LOC_Os03g30890 // LOC_Os09g37790 // LOC_Os04g34330
GO:0010468	P	regulation of gene expression	195	3060	1577	24075	0.66	1	// LOC_Os04g47890 // LOC_Os03g12570 // LOC_Os09g38010 // LOC_Os04g54900 // LOC_Os04g47059 // LOC_Os08g38590 // LOC_Os04g32960 // LOC_Os04g57720 // LOC_Os02g45200 // LOC_Os02g36924 // LOC_Os01g74540 // LOC_Os01g62660 // LOC_Os06g08290 // LOC_Os01g55150 // LOC_Os05g42180 // LOC_Os01g68370 // LOC_Os05g48850 // LOC_Os04g23890 // LOC_Os05g51850 // LOC_Os02g15760 // LOC_Os09g30400 // LOC_Os07g05010 // …
GO:0032501	P	multicellular organismal process	20	3060	154	24075	0.5	1	// LOC_Os09g37780 // LOC_Os01g12410 // LOC_Os09g37834 // LOC_Os01g12430 // LOC_Os04g42740 // LOC_Os01g03420 // LOC_Os01g03170 // LOC_Os05g14860 // LOC_Os05g07080 // LOC_Os02g47200 // LOC_Os01g13370 // LOC_Os03g30890 // LOC_Os07g36544 // LOC_Os12g07800 // LOC_Os06g02028 // LOC_Os04g07200 // LOC_Os01g12420 // LOC_Os03g61310 // LOC_Os09g37790 // LOC_Os04g34330
GO:0006139	P	nucleobase, nucleoside, nucleotide and nucleic acid metabolic process	463	3060	6695	24075	1	1	// LOC_Os04g47059 // LOC_Os08g38590 // LOC_Os04g01530 // LOC_Os12g27410 // LOC_Os01g62820 // LOC_Os04g23890 // LOC_Os02g50350 // LOC_Os02g15760 // LOC_Os09g32260 // LOC_Os02g35660 // LOC_Os06g44320 // LOC_Os09g24800 // LOC_Os01g48700 // LOC_Os05g18740 // LOC_Os12g07910 // LOC_Os09g24660 // LOC_Os09g37320 // LOC_Os01g58010 // LOC_Os04g29870 // LOC_Os02g07870 // LOC_Os02g52250 // LOC_Os05g48422 // …
GO:0060255	P	regulation of macromolecule metabolic process	202	3060	1640	24075	0.68	1	// LOC_Os04g47890 // LOC_Os03g12570 // LOC_Os09g38010 // LOC_Os04g54900 // LOC_Os04g47059 // LOC_Os08g38590 // LOC_Os04g32960 // LOC_Os04g57720 // LOC_Os02g45200 // LOC_Os02g36924 // LOC_Os01g74540 // LOC_Os01g62660 // LOC_Os06g08290 // LOC_Os01g55150 // LOC_Os05g42180 // LOC_Os01g68370 // LOC_Os05g48850 // LOC_Os04g23890 // LOC_Os05g51850 // LOC_Os02g15760 // LOC_Os09g30400 // LOC_Os07g05010 // …
GO:0009058	P	biosynthetic process	540	3060	6085	24075	1	1	// LOC_Os01g33960 // LOC_Os12g41780 // LOC_Os01g11350 // LOC_Os08g38590 // LOC_Os11g14460 // LOC_Os12g27410 // LOC_Os03g14990 // LOC_Os01g62820 // LOC_Os04g23890 // LOC_Os02g50350 // LOC_Os04g33300 // LOC_Os01g59730 // LOC_Os09g32260 // LOC_Os02g35660 // LOC_Os11g31650 // LOC_Os09g24800 // LOC_Os03g59720 // LOC_Os01g48700 // LOC_Os04g57410 // LOC_Os03g03370 // LOC_Os01g01710 // LOC_Os04g38950 // …
GO:0022414	P	reproductive process	14	3060	114	24075	0.59	1	// LOC_Os09g37780 // LOC_Os01g12410 // LOC_Os09g37834 // LOC_Os01g12430 // LOC_Os04g42740 // LOC_Os05g07080 // LOC_Os07g36544 // LOC_Os12g07800 // LOC_Os03g61310 // LOC_Os04g07200 // LOC_Os01g12420 // LOC_Os03g30890 // LOC_Os09g37790 // LOC_Os04g34330
GO:0009059	P	macromolecule biosynthetic process	365	3060	5252	24075	1	1	// LOC_Os01g33960 // LOC_Os12g41780 // LOC_Os08g38590 // LOC_Os12g27410 // LOC_Os01g62820 // LOC_Os04g23890 // LOC_Os08g01859 // LOC_Os01g59730 // LOC_Os09g32260 // LOC_Os02g35660 // LOC_Os11g31650 // LOC_Os09g24800 // LOC_Os03g59720 // LOC_Os01g48700 // LOC_Os07g36700 // LOC_Os09g24660 // LOC_Os08g33920 // LOC_Os03g60100 // LOC_Os09g37320 // LOC_Os04g29870 // LOC_Os02g45770 // LOC_Os04g45400 // …
GO:0008152	P	metabolic process	1638	3060	14398	24075	1	1	// LOC_Os12g41780 // LOC_Os06g04530 // LOC_Os08g38590 // LOC_Os01g52214 // LOC_Os05g34460 // LOC_Os05g06300 // LOC_Os09g32260 // LOC_Os10g18260 // LOC_Os11g31650 // LOC_Os10g05088 // LOC_Os09g24800 // LOC_Os11g34680 // LOC_Os04g12690 // LOC_Os09g24660 // LOC_Os04g45470 // LOC_Os03g60100 // LOC_Os02g35760 // LOC_Os02g07870 // LOC_Os06g13450 // LOC_Os04g46390 // LOC_Os03g07430 // LOC_Os04g18020 // …
GO:0007154	P	cell communication	27	3060	170	24075	0.17	1	// LOC_Os09g37780 // LOC_Os01g12410 // LOC_Os04g42740 // LOC_Os03g17540 // LOC_Os04g02690 // LOC_Os12g07800 // LOC_Os04g34330 // LOC_Os08g43380 // LOC_Os05g31720 // LOC_Os08g25010 // LOC_Os08g42530 // LOC_Os07g36544 // LOC_Os04g07200 // LOC_Os01g12420 // LOC_Os09g37790 // LOC_Os07g34130 // LOC_Os02g56570 // LOC_Os09g37834 // LOC_Os05g07080 // LOC_Os03g61310 // LOC_Os02g39030 // LOC_Os03g30890 // …
GO:0051704	P	multi-organism process	14	3060	120	24075	0.66	1	// LOC_Os09g37780 // LOC_Os01g12410 // LOC_Os09g37834 // LOC_Os01g12430 // LOC_Os04g42740 // LOC_Os05g07080 // LOC_Os07g36544 // LOC_Os12g07800 // LOC_Os03g61310 // LOC_Os04g07200 // LOC_Os01g12420 // LOC_Os03g30890 // LOC_Os09g37790 // LOC_Os04g34330
GO:0044238	P	primary metabolic process	1234	3060	11969	24075	1	1	// LOC_Os01g10900 // LOC_Os01g33960 // LOC_Os12g41780 // LOC_Os06g04530 // LOC_Os07g30160 // LOC_Os11g13860 // LOC_Os08g38590 // LOC_Os08g02440 // LOC_Os10g08022 // LOC_Os04g40874 // LOC_Os12g30150 // LOC_Os06g08790 // LOC_Os02g16630 // LOC_Os05g34460 // LOC_Os11g14460 // LOC_Os04g15560 // LOC_Os03g14990 // LOC_Os01g62820 // LOC_Os02g03550 // LOC_Os05g31160 // LOC_Os04g23890 // LOC_Os06g04610 // …
GO:0019538	P	protein metabolic process	487	3060	4333	24075	1	1	// LOC_Os12g41780 // LOC_Os06g04530 // LOC_Os11g13860 // LOC_Os08g02440 // LOC_Os01g54350 // LOC_Os03g11410 // LOC_Os05g34460 // LOC_Os04g15560 // LOC_Os04g23890 // LOC_Os08g01859 // LOC_Os01g59730 // LOC_Os10g33650 // LOC_Os11g36150 // LOC_Os10g18260 // LOC_Os11g31650 // LOC_Os11g36090 // LOC_Os02g12670 // LOC_Os01g39250 // LOC_Os02g01230 // LOC_Os03g41460 // LOC_Os08g33920 // LOC_Os06g38670 // …
GO:0050896	P	response to stimulus	138	3060	1026	24075	0.27	1	// LOC_Os07g11360 // LOC_Os02g05820 // LOC_Os01g57450 // LOC_Os06g45100 // LOC_Os06g01260 // LOC_Os06g41670 // LOC_Os02g10990 // LOC_Os01g23380 // LOC_Os08g43010 // LOC_Os04g59600 // LOC_Os03g02939 // LOC_Os01g12580 // LOC_Os02g49790 // LOC_Os04g57800 // LOC_Os06g09230 // LOC_Os01g56940 // LOC_Os01g25760 // LOC_Os05g26926 // LOC_Os02g12670 // LOC_Os11g10460 // LOC_Os10g41220 // LOC_Os03g14900 // …
GO:0006950	P	response to stress	106	3060	873	24075	0.69	1	// LOC_Os07g11360 // LOC_Os02g05820 // LOC_Os01g57450 // LOC_Os06g45100 // LOC_Os06g41670 // LOC_Os02g10990 // LOC_Os01g23380 // LOC_Os08g43010 // LOC_Os01g12580 // LOC_Os06g09230 // LOC_Os01g56940 // LOC_Os08g28570 // LOC_Os01g25760 // LOC_Os05g26926 // LOC_Os02g12670 // LOC_Os11g10460 // LOC_Os10g41220 // LOC_Os03g14900 // LOC_Os03g41460 // LOC_Os11g29090 // LOC_Os04g46300 // LOC_Os08g07380 // …
GO:0044237	P	cellular metabolic process	1126	3060	10696	24075	1	1	// LOC_Os01g10900 // LOC_Os01g33960 // LOC_Os12g41780 // LOC_Os07g30160 // LOC_Os11g13860 // LOC_Os08g38590 // LOC_Os08g02440 // LOC_Os10g08022 // LOC_Os12g30150 // LOC_Os06g08790 // LOC_Os02g16630 // LOC_Os11g14460 // LOC_Os04g15560 // LOC_Os03g14990 // LOC_Os01g62820 // LOC_Os04g53830 // LOC_Os05g31160 // LOC_Os04g23890 // LOC_Os06g04610 // LOC_Os02g50350 // LOC_Os04g37460 // LOC_Os04g33300 // …
GO:0043170	P	macromolecule metabolic process	923	3060	10433	24075	1	1	// LOC_Os01g33960 // LOC_Os12g41780 // LOC_Os06g04530 // LOC_Os04g47059 // LOC_Os11g13860 // LOC_Os08g38590 // LOC_Os08g02440 // LOC_Os10g08022 // LOC_Os05g04690 // LOC_Os12g30150 // LOC_Os03g11410 // LOC_Os05g34460 // LOC_Os04g15560 // LOC_Os01g62820 // LOC_Os04g23890 // LOC_Os06g04610 // LOC_Os08g01859 // LOC_Os01g59730 // LOC_Os09g32260 // LOC_Os11g36150 // LOC_Os10g18260 // LOC_Os11g31650 // …
GO:0032502	P	developmental process	6	3060	28	24075	0.18	1	// LOC_Os01g03420 // LOC_Os05g14860 // LOC_Os01g03170 // LOC_Os01g13370 // LOC_Os06g02028 // LOC_Os10g40130
GO:0009875	P	pollen-pistil interaction	14	3060	114	24075	0.59	1	// LOC_Os09g37780 // LOC_Os01g12410 // LOC_Os09g37834 // LOC_Os01g12430 // LOC_Os04g42740 // LOC_Os05g07080 // LOC_Os07g36544 // LOC_Os12g07800 // LOC_Os03g61310 // LOC_Os04g07200 // LOC_Os01g12420 // LOC_Os03g30890 // LOC_Os09g37790 // LOC_Os04g34330
GO:0006350	P	transcription	205	3060	1629	24075	0.57	1	// LOC_Os04g47890 // LOC_Os09g38010 // LOC_Os04g54900 // LOC_Os01g10810 // LOC_Os08g38590 // LOC_Os03g32590 // LOC_Os04g57720 // LOC_Os02g45200 // LOC_Os02g36924 // LOC_Os01g74540 // LOC_Os06g07190 // LOC_Os06g08290 // LOC_Os01g55150 // LOC_Os05g42180 // LOC_Os01g68370 // LOC_Os05g48850 // LOC_Os04g23890 // LOC_Os05g51850 // LOC_Os02g15760 // LOC_Os09g30400 // LOC_Os07g05010 // LOC_Os07g48260 // …
GO:0006259	P	DNA metabolic process	162	3060	4515	24075	1	1	// LOC_Os03g12570 // LOC_Os06g50200 // LOC_Os08g20220 // LOC_Os06g45100 // LOC_Os12g33956 // LOC_Os05g45340 // LOC_Os12g27410 // LOC_Os02g33910 // LOC_Os02g54280 // LOC_Os11g01090 // LOC_Os01g56940 // LOC_Os04g25130 // LOC_Os12g06270 // LOC_Os01g42630 // LOC_Os05g05810 // LOC_Os12g26900 // LOC_Os07g20370 // LOC_Os03g54091 // LOC_Os03g10220 // LOC_Os03g38570 // LOC_Os08g29980 // LOC_Os12g07910 // …
GO:0007275	P	multicellular organismal development	5	3060	27	24075	0.29	1	// LOC_Os06g02028 // LOC_Os01g13370 // LOC_Os01g03170 // LOC_Os05g14860 // LOC_Os01g03420
GO:0009987	P	cellular process	1495	3060	12839	24075	1	1	// LOC_Os01g12470 // LOC_Os12g41780 // LOC_Os08g38590 // LOC_Os03g62410 // LOC_Os07g03910 // LOC_Os05g06300 // LOC_Os09g32260 // LOC_Os10g18260 // LOC_Os11g31650 // LOC_Os09g24800 // LOC_Os09g24660 // LOC_Os07g02624 // LOC_Os03g60100 // LOC_Os02g35760 // LOC_Os02g07870 // LOC_Os06g13450 // LOC_Os04g46390 // LOC_Os03g07430 // LOC_Os02g45380 // LOC_Os06g08560 // LOC_Os03g59450 // LOC_Os04g18020 // …
GO:0006412	P	translation	72	3060	595	24075	0.67	1	// LOC_Os03g59720 // LOC_Os10g35690 // LOC_Os07g42950 // LOC_Os01g62350 // LOC_Os09g24408 // LOC_Os05g48050 // LOC_Os12g30490 // LOC_Os03g52400 // LOC_Os01g14830 // LOC_Os04g38750 // LOC_Os12g21798 // LOC_Os07g42450 // LOC_Os01g69950 // LOC_Os06g34780 // LOC_Os12g37610 // LOC_Os03g12020 // LOC_Os08g10608 // LOC_Os08g02840 // LOC_Os03g41612 // LOC_Os10g26050 // LOC_Os07g12250 // LOC_Os01g19840 // …
GO:0005215	F	transporter activity	210	3060	941	24075	7e-13	8e-11	// LOC_Os03g09870 // LOC_Os01g71240 // LOC_Os01g12260 // LOC_Os01g12470 // LOC_Os04g33700 // LOC_Os02g58660 // LOC_Os07g26460 // LOC_Os08g30480 // LOC_Os04g41450 // LOC_Os04g59600 // LOC_Os02g21750 // LOC_Os05g34010 // LOC_Os08g31410 // LOC_Os02g31940 // LOC_Os10g39790 // LOC_Os07g03910 // LOC_Os06g05080 // LOC_Os02g51110 // LOC_Os01g19770 // LOC_Os12g06570 // LOC_Os02g44080 // LOC_Os04g52390 // …
GO:0016817	F	hydrolase activity, acting on acid anhydrides	140	3060	764	24075	5.9e-05	0.0023	// LOC_Os01g71240 // LOC_Os09g27060 // LOC_Os01g39260 // LOC_Os01g12260 // LOC_Os04g33700 // LOC_Os03g02290 // LOC_Os01g04814 // LOC_Os06g34420 // LOC_Os02g21750 // LOC_Os09g21520 // LOC_Os11g46240 // LOC_Os03g44420 // LOC_Os01g12660 // LOC_Os12g28137 // LOC_Os05g32370 // LOC_Os03g63410 // LOC_Os06g48240 // LOC_Os05g02870 // LOC_Os03g46740 // LOC_Os01g39250 // LOC_Os04g44610 // LOC_Os04g04060 // …
GO:0016462	F	pyrophosphatase activity	137	3060	743	24075	5.5e-05	0.0023	// LOC_Os01g71240 // LOC_Os09g27060 // LOC_Os01g39260 // LOC_Os01g12260 // LOC_Os04g33700 // LOC_Os03g02290 // LOC_Os01g04814 // LOC_Os06g34420 // LOC_Os02g21750 // LOC_Os09g21520 // LOC_Os11g46240 // LOC_Os03g44420 // LOC_Os01g12660 // LOC_Os12g28137 // LOC_Os05g32370 // LOC_Os03g63410 // LOC_Os06g48240 // LOC_Os05g02870 // LOC_Os03g46740 // LOC_Os01g39250 // LOC_Os04g44610 // LOC_Os04g04060 // …
GO:0000166	F	nucleotide binding	575	3060	3874	24075	0.0001	0.0023	// LOC_Os11g13860 // LOC_Os08g02440 // LOC_Os04g01530 // LOC_Os01g54350 // LOC_Os01g04814 // LOC_Os07g01530 // LOC_Os04g15560 // LOC_Os12g31800 // LOC_Os07g16040 // LOC_Os04g23890 // LOC_Os03g44420 // LOC_Os11g04840 // LOC_Os11g29510 // LOC_Os05g40150 // LOC_Os10g33650 // LOC_Os11g36150 // LOC_Os10g18260 // LOC_Os06g48240 // LOC_Os11g36090 // LOC_Os02g12670 // LOC_Os01g39250 // LOC_Os01g01302 // …
GO:0016818	F	hydrolase activity, acting on acid anhydrides, in phosphorus-containing anhydrides	138	3060	759	24075	9.1e-05	0.0023	// LOC_Os01g71240 // LOC_Os09g27060 // LOC_Os01g39260 // LOC_Os01g12260 // LOC_Os04g33700 // LOC_Os03g02290 // LOC_Os01g04814 // LOC_Os06g34420 // LOC_Os02g21750 // LOC_Os09g21520 // LOC_Os11g46240 // LOC_Os03g44420 // LOC_Os01g12660 // LOC_Os12g28137 // LOC_Os05g32370 // LOC_Os03g63410 // LOC_Os06g48240 // LOC_Os05g02870 // LOC_Os03g46740 // LOC_Os01g39250 // LOC_Os04g44610 // LOC_Os04g04060 // …
GO:0005515	F	protein binding	378	3060	2460	24075	0.00021	0.0034	// LOC_Os08g02440 // LOC_Os05g34460 // LOC_Os02g29410 // LOC_Os10g29230 // LOC_Os04g57800 // LOC_Os01g69040 // LOC_Os01g50340 // LOC_Os11g36150 // LOC_Os11g36090 // LOC_Os01g11490 // LOC_Os02g02140 // LOC_Os08g13000 // LOC_Os03g60530 // LOC_Os01g11952 // LOC_Os02g35000 // LOC_Os02g52316 // LOC_Os02g52250 // LOC_Os05g41090 // LOC_Os06g04840 // LOC_Os04g57660 // LOC_Os01g74040 // LOC_Os02g12570 // …
GO:0017111	F	nucleoside-triphosphatase activity	131	3060	726	24075	0.00018	0.0034	// LOC_Os01g71240 // LOC_Os09g27060 // LOC_Os01g39260 // LOC_Os01g12260 // LOC_Os04g33700 // LOC_Os03g02290 // LOC_Os01g04814 // LOC_Os06g34420 // LOC_Os02g21750 // LOC_Os09g21520 // LOC_Os11g46240 // LOC_Os03g44420 // LOC_Os01g12660 // LOC_Os12g28137 // LOC_Os05g32370 // LOC_Os03g63410 // LOC_Os06g48240 // LOC_Os05g02870 // LOC_Os03g46740 // LOC_Os01g39250 // LOC_Os04g44610 // LOC_Os04g04060 // …
GO:0030234	F	enzyme regulator activity	56	3060	255	24075	0.00027	0.0039	// LOC_Os11g08680 // LOC_Os07g11360 // LOC_Os03g41419 // LOC_Os07g14340 // LOC_Os11g13560 // LOC_Os01g08310 // LOC_Os03g17540 // LOC_Os04g02690 // LOC_Os01g68540 // LOC_Os01g55520 // LOC_Os01g58890 // LOC_Os01g52460 // LOC_Os04g54850 // LOC_Os03g28090 // LOC_Os08g43380 // LOC_Os05g31720 // LOC_Os08g25010 // LOC_Os05g20570 // LOC_Os05g05640 // LOC_Os01g20970 // LOC_Os08g42530 // LOC_Os05g33880 // …
GO:0016301	F	kinase activity	277	3060	1750	24075	0.00032	0.0041	// LOC_Os01g10900 // LOC_Os02g05820 // LOC_Os03g12570 // LOC_Os12g40880 // LOC_Os07g04000 // LOC_Os11g13860 // LOC_Os08g02440 // LOC_Os04g01530 // LOC_Os01g54350 // LOC_Os04g15560 // LOC_Os04g34330 // LOC_Os10g26520 // LOC_Os03g37120 // LOC_Os11g41650 // LOC_Os04g23890 // LOC_Os03g59390 // LOC_Os06g09230 // LOC_Os11g35100 // LOC_Os07g29330 // LOC_Os09g38700 // LOC_Os11g04840 // LOC_Os04g38910 // …
GO:0008289	F	lipid binding	21	3060	85	24075	0.0071	0.081	// LOC_Os09g27990 // LOC_Os03g50280 // LOC_Os08g36410 // LOC_Os03g14000 // LOC_Os01g65860 // LOC_Os02g07900 // LOC_Os08g06550 // LOC_Os07g26460 // LOC_Os06g45050 // LOC_Os06g06340 // LOC_Os02g51750 // LOC_Os02g40890 // LOC_Os01g50010 // LOC_Os06g10890 // LOC_Os09g23160 // LOC_Os11g24070 // LOC_Os05g40010 // LOC_Os07g07870 // LOC_Os03g57990 // LOC_Os05g35160 // LOC_Os04g58550
GO:0005198	F	structural molecule activity	75	3060	462	24075	0.03	0.31	// LOC_Os10g35690 // LOC_Os04g55200 // LOC_Os06g20354 // LOC_Os04g34460 // LOC_Os09g24408 // LOC_Os08g05890 // LOC_Os08g28230 // LOC_Os05g48050 // LOC_Os04g46780 // LOC_Os03g52400 // LOC_Os01g14830 // LOC_Os04g38750 // LOC_Os12g21798 // LOC_Os12g42180 // LOC_Os01g69950 // LOC_Os03g11970 // LOC_Os12g30490 // LOC_Os06g34780 // LOC_Os03g12020 // LOC_Os08g10608 // LOC_Os02g42940 // LOC_Os08g02840 // …
GO:0060089	F	molecular transducer activity	24	3060	152	24075	0.19	1	// LOC_Os06g02130 // LOC_Os11g17080 // LOC_Os09g26160 // LOC_Os01g47530 // LOC_Os03g12350 // LOC_Os04g57720 // LOC_Os08g44350 // LOC_Os06g08900 // LOC_Os11g02620 // LOC_Os04g23890 // LOC_Os11g04720 // LOC_Os01g43910 // LOC_Os06g06090 // LOC_Os03g55830 // LOC_Os06g08890 // LOC_Os01g45620 // LOC_Os03g41350 // LOC_Os01g57230 // LOC_Os05g50120 // LOC_Os07g15540 // LOC_Os12g04500 // LOC_Os04g57800 // …
GO:0016740	F	transferase activity	586	3060	6190	24075	1	1	// LOC_Os01g33960 // LOC_Os12g41780 // LOC_Os11g13860 // LOC_Os07g36700 // LOC_Os08g02440 // LOC_Os04g01530 // LOC_Os12g30150 // LOC_Os04g15560 // LOC_Os07g02540 // LOC_Os10g27330 // LOC_Os04g23890 // LOC_Os11g04840 // LOC_Os01g50480 // LOC_Os12g06270 // LOC_Os11g36150 // LOC_Os10g18260 // LOC_Os03g61720 // LOC_Os11g36090 // LOC_Os02g12670 // LOC_Os04g57410 // LOC_Os03g41460 // LOC_Os05g45710 // …
GO:0005488	F	binding	1809	3060	16823	24075	1	1	// LOC_Os01g12470 // LOC_Os08g38590 // LOC_Os01g52214 // LOC_Os05g34460 // LOC_Os12g31800 // LOC_Os03g62410 // LOC_Os05g06300 // LOC_Os09g32260 // LOC_Os10g18260 // LOC_Os03g37920 // LOC_Os09g24800 // LOC_Os06g39640 // LOC_Os01g63620 // LOC_Os11g34680 // LOC_Os08g06550 // LOC_Os09g24660 // LOC_Os07g02624 // LOC_Os04g25410 // LOC_Os02g35760 // LOC_Os02g07870 // LOC_Os02g52316 // LOC_Os06g13450 // …
GO:0003676	F	nucleic acid binding	544	3060	8251	24075	1	1	// LOC_Os08g38590 // LOC_Os02g29410 // LOC_Os12g27410 // LOC_Os01g62820 // LOC_Os12g31800 // LOC_Os01g67570 // LOC_Os01g15460 // LOC_Os01g50340 // LOC_Os09g32260 // LOC_Os09g24800 // LOC_Os06g39640 // LOC_Os01g48700 // LOC_Os11g34680 // LOC_Os12g07910 // LOC_Os10g41260 // LOC_Os09g37320 // LOC_Os03g62780 // LOC_Os04g29870 // LOC_Os05g48422 // LOC_Os04g45400 // LOC_Os03g12350 // LOC_Os06g25560 // …
GO:0003677	F	DNA binding	334	3060	5059	24075	1	1	// LOC_Os02g10060 // LOC_Os04g47890 // LOC_Os03g12570 // LOC_Os09g38010 // LOC_Os04g54450 // LOC_Os06g05460 // LOC_Os08g38590 // LOC_Os03g57870 // LOC_Os01g01560 // LOC_Os02g45200 // LOC_Os02g29410 // LOC_Os09g27060 // LOC_Os07g48260 // LOC_Os01g74540 // LOC_Os01g62660 // LOC_Os06g08290 // LOC_Os01g55150 // LOC_Os01g68370 // LOC_Os11g01090 // LOC_Os01g51260 // LOC_Os01g56940 // LOC_Os05g51850 // …
GO:0003774	F	motor activity	10	3060	69	24075	0.4	1	// LOC_Os03g64290 // LOC_Os10g25565 // LOC_Os01g42070 // LOC_Os11g44880 // LOC_Os03g02290 // LOC_Os02g13580 // LOC_Os05g46030 // LOC_Os04g38880 // LOC_Os02g13570 // LOC_Os06g29350
GO:0016787	F	hydrolase activity	521	3060	4901	24075	1	1	// LOC_Os08g40200 // LOC_Os06g35370 // LOC_Os06g04530 // LOC_Os02g50690 // LOC_Os05g04690 // LOC_Os01g04814 // LOC_Os05g34460 // LOC_Os11g14460 // LOC_Os05g07880 // LOC_Os02g32660 // LOC_Os04g50870 // LOC_Os01g58640 // LOC_Os05g20570 // LOC_Os03g44420 // LOC_Os03g18520 // LOC_Os03g01020 // LOC_Os06g48240 // LOC_Os10g05088 // LOC_Os01g39250 // LOC_Os09g26360 // LOC_Os06g51084 // LOC_Os12g34018 // …
GO:0016788	F	hydrolase activity, acting on ester bonds	169	3060	1949	24075	1	1	// LOC_Os01g17360 // LOC_Os08g29160 // LOC_Os05g07880 // LOC_Os02g05030 // LOC_Os07g46520 // LOC_Os04g32960 // LOC_Os10g40150 // LOC_Os04g48800 // LOC_Os11g08760 // LOC_Os02g37590 // LOC_Os02g54280 // LOC_Os01g58640 // LOC_Os05g20570 // LOC_Os03g63720 // LOC_Os01g56940 // LOC_Os07g41150 // LOC_Os07g47250 // LOC_Os02g01310 // LOC_Os03g61530 // LOC_Os06g39600 // LOC_Os07g37220 // LOC_Os10g05088 // …
GO:0003824	F	catalytic activity	1572	3060	12724	24075	0.94	1	// LOC_Os12g41780 // LOC_Os06g04530 // LOC_Os01g52214 // LOC_Os05g34460 // LOC_Os05g06300 // LOC_Os06g38510 // LOC_Os12g06270 // LOC_Os10g18260 // LOC_Os10g05088 // LOC_Os11g34680 // LOC_Os03g52150 // LOC_Os04g45470 // LOC_Os02g35760 // LOC_Os02g07870 // LOC_Os06g13450 // LOC_Os03g07430 // LOC_Os03g19510 // LOC_Os03g05806 // LOC_Os03g21120 // LOC_Os06g44170 // LOC_Os04g22060 // LOC_Os07g09520 // …
GO:0016772	F	transferase activity, transferring phosphorus-containing groups	361	3060	4781	24075	1	1	// LOC_Os11g13860 // LOC_Os08g02440 // LOC_Os04g01530 // LOC_Os01g54350 // LOC_Os04g15560 // LOC_Os04g23890 // LOC_Os11g04840 // LOC_Os12g06270 // LOC_Os11g36150 // LOC_Os10g18260 // LOC_Os11g36090 // LOC_Os02g12670 // LOC_Os01g01302 // LOC_Os03g41460 // LOC_Os04g39420 // LOC_Os04g38910 // LOC_Os11g12530 // LOC_Os09g37320 // LOC_Os02g35760 // LOC_Os04g29870 // LOC_Os04g30060 // LOC_Os01g02760 // …
GO:0008135	F	translation factor activity, nucleic acid binding	10	3060	75	24075	0.49	1	// LOC_Os03g14510 // LOC_Os07g36250 // LOC_Os03g60130 // LOC_Os01g71270 // LOC_Os07g12630 // LOC_Os03g08020 // LOC_Os05g31160 // LOC_Os11g43600 // LOC_Os03g63410 // LOC_Os05g49970
GO:0004518	F	nuclease activity	34	3060	1337	24075	1	1	// LOC_Os01g17360 // LOC_Os10g11190 // LOC_Os12g23530 // LOC_Os07g36720 // LOC_Os12g21730 // LOC_Os12g10850 // LOC_Os04g54390 // LOC_Os08g12350 // LOC_Os01g47100 // LOC_Os02g54280 // LOC_Os03g63720 // LOC_Os01g56940 // LOC_Os10g40150 // LOC_Os06g46960 // LOC_Os09g11630 // LOC_Os02g34570 // LOC_Os02g34180 // LOC_Os07g02170 // LOC_Os10g18890 // LOC_Os04g32560 // LOC_Os03g18940 // LOC_Os03g38570 // …
GO:0003723	F	RNA binding	104	3060	3190	24075	1	1	// LOC_Os06g50200 // LOC_Os08g20220 // LOC_Os12g33956 // LOC_Os12g27410 // LOC_Os02g33910 // LOC_Os01g67570 // LOC_Os03g63720 // LOC_Os04g25130 // LOC_Os10g36860 // LOC_Os12g34128 // LOC_Os12g31000 // LOC_Os03g17030 // LOC_Os11g05556 // LOC_Os12g26900 // LOC_Os07g20370 // LOC_Os03g38570 // LOC_Os05g26040 // LOC_Os08g33420 // LOC_Os09g37320 // LOC_Os03g62780 // LOC_Os04g29870 // LOC_Os09g10930 // …
GO:0003682	F	chromatin binding	14	3060	913	24075	1	1	// LOC_Os04g45410 // LOC_Os01g02740 // LOC_Os10g17360 // LOC_Os03g12570 // LOC_Os03g26760 // LOC_Os04g22060 // LOC_Os11g14610 // LOC_Os02g21840 // LOC_Os08g22660 // LOC_Os10g16720 // LOC_Os07g24240 // LOC_Os10g16880 // LOC_Os04g11350 // LOC_Os04g45400
GO:0030246	F	carbohydrate binding	31	3060	219	24075	0.31	1	// LOC_Os09g37780 // LOC_Os01g12410 // LOC_Os04g42740 // LOC_Os09g15820 // LOC_Os01g33230 // LOC_Os02g36770 // LOC_Os08g03670 // LOC_Os07g46790 // LOC_Os01g57490 // LOC_Os12g07800 // LOC_Os02g55910 // LOC_Os04g34330 // LOC_Os09g36810 // LOC_Os07g36544 // LOC_Os04g51390 // LOC_Os03g30890 // LOC_Os01g12420 // LOC_Os09g37790 // LOC_Os09g37834 // LOC_Os03g58920 // LOC_Os05g07080 // LOC_Os06g43650 // …
GO:0004871	F	signal transducer activity	24	3060	152	24075	0.19	1	// LOC_Os06g02130 // LOC_Os11g17080 // LOC_Os09g26160 // LOC_Os01g47530 // LOC_Os03g12350 // LOC_Os04g57720 // LOC_Os08g44350 // LOC_Os06g08900 // LOC_Os11g02620 // LOC_Os04g23890 // LOC_Os11g04720 // LOC_Os01g43910 // LOC_Os06g06090 // LOC_Os03g55830 // LOC_Os06g08890 // LOC_Os01g45620 // LOC_Os03g41350 // LOC_Os01g57230 // LOC_Os05g50120 // LOC_Os07g15540 // LOC_Os12g04500 // LOC_Os04g57800 // …
GO:0030528	F	transcription regulator activity	123	3060	987	24075	0.6	1	// LOC_Os04g47059 // LOC_Os04g54900 // LOC_Os01g10810 // LOC_Os08g38590 // LOC_Os04g57720 // LOC_Os02g36924 // LOC_Os01g74540 // LOC_Os01g62820 // LOC_Os01g55150 // LOC_Os05g42180 // LOC_Os03g60130 // LOC_Os02g15760 // LOC_Os09g30400 // LOC_Os07g05010 // LOC_Os07g48260 // LOC_Os12g02420 // LOC_Os02g35660 // LOC_Os06g44320 // LOC_Os01g48700 // LOC_Os03g52450 // LOC_Os01g48170 // LOC_Os01g04020 // …
GO:0003700	F	transcription factor activity	78	3060	651	24075	0.71	1	// LOC_Os01g64020 // LOC_Os02g10140 // LOC_Os05g41540 // LOC_Os10g18099 // LOC_Os12g43950 // LOC_Os07g48660 // LOC_Os07g22960 // LOC_Os06g50480 // LOC_Os08g38590 // LOC_Os04g55520 // LOC_Os07g48260 // LOC_Os01g14440 // LOC_Os03g13614 // LOC_Os05g41070 // LOC_Os02g36924 // LOC_Os04g38770 // LOC_Os01g60270 // LOC_Os01g74540 // LOC_Os03g05160 // LOC_Os03g21800 // LOC_Os01g48170 // LOC_Os09g31390 // …
GO:0016020	C	membrane	416	3060	2115	24075	1.6e-16	2.7e-14	// LOC_Os05g03140 // LOC_Os01g12470 // LOC_Os01g33960 // LOC_Os12g41780 // LOC_Os02g58660 // LOC_Os07g36700 // LOC_Os03g01016 // LOC_Os08g25710 // LOC_Os08g34460 // LOC_Os02g31940 // LOC_Os03g56300 // LOC_Os07g03910 // LOC_Os11g24450 // LOC_Os01g19770 // LOC_Os01g51120 // LOC_Os12g06570 // LOC_Os01g39250 // LOC_Os04g52390 // LOC_Os12g33020 // LOC_Os09g26160 // LOC_Os09g38520 // LOC_Os09g26830 // …
GO:0044464	C	cell part	926	3060	5945	24075	3.1e-11	1.7e-09	// LOC_Os01g60650 // LOC_Os11g19220 // LOC_Os05g03140 // LOC_Os01g12470 // LOC_Os01g33960 // LOC_Os12g41780 // LOC_Os02g58660 // LOC_Os08g38590 // LOC_Os08g34190 // LOC_Os03g01016 // LOC_Os05g07880 // LOC_Os08g34460 // LOC_Os01g62820 // LOC_Os02g31940 // LOC_Os04g20420 // LOC_Os02g50350 // LOC_Os07g03910 // LOC_Os08g01859 // LOC_Os11g24450 // LOC_Os01g59730 // LOC_Os12g06270 // LOC_Os02g35660 // …
GO:0005623	C	cell	926	3060	5945	24075	3.1e-11	1.7e-09	// LOC_Os01g60650 // LOC_Os11g19220 // LOC_Os05g03140 // LOC_Os01g12470 // LOC_Os01g33960 // LOC_Os12g41780 // LOC_Os02g58660 // LOC_Os08g38590 // LOC_Os08g34190 // LOC_Os03g01016 // LOC_Os05g07880 // LOC_Os08g34460 // LOC_Os01g62820 // LOC_Os02g31940 // LOC_Os04g20420 // LOC_Os02g50350 // LOC_Os07g03910 // LOC_Os08g01859 // LOC_Os11g24450 // LOC_Os01g59730 // LOC_Os12g06270 // LOC_Os02g35660 // …
GO:0005737	C	cytoplasm	231	3060	1263	24075	2.9e-07	1.2e-05	// LOC_Os03g09870 // LOC_Os04g31040 // LOC_Os05g49050 // LOC_Os01g12470 // LOC_Os09g24408 // LOC_Os07g26460 // LOC_Os05g48050 // LOC_Os03g51479 // LOC_Os01g63240 // LOC_Os04g38750 // LOC_Os05g50220 // LOC_Os08g42530 // LOC_Os02g12570 // LOC_Os08g36410 // LOC_Os07g36250 // LOC_Os06g01630 // LOC_Os04g32650 // LOC_Os03g44420 // LOC_Os02g50350 // LOC_Os06g05080 // LOC_Os07g47500 // LOC_Os11g24450 // …
GO:0044444	C	cytoplasmic part	181	3060	966	24075	1.6e-06	5.2e-05	// LOC_Os03g09870 // LOC_Os04g31040 // LOC_Os01g12470 // LOC_Os09g24408 // LOC_Os02g19990 // LOC_Os05g48050 // LOC_Os01g63240 // LOC_Os04g38750 // LOC_Os05g50220 // LOC_Os02g12570 // LOC_Os08g36410 // LOC_Os06g01630 // LOC_Os07g12250 // LOC_Os06g05080 // LOC_Os11g24450 // LOC_Os01g59730 // LOC_Os12g06270 // LOC_Os12g34128 // LOC_Os04g25540 // LOC_Os01g19770 // LOC_Os11g31650 // LOC_Os03g59720 // …
GO:0032991	C	macromolecular complex	215	3060	1207	24075	3.7e-06	0.0001	// LOC_Os11g19220 // LOC_Os01g12260 // LOC_Os01g33960 // LOC_Os09g24408 // LOC_Os04g32960 // LOC_Os04g38750 // LOC_Os01g62820 // LOC_Os08g36410 // LOC_Os08g37570 // LOC_Os06g04030 // LOC_Os03g44420 // LOC_Os05g51850 // LOC_Os08g01859 // LOC_Os01g59730 // LOC_Os07g17390 // LOC_Os12g06270 // LOC_Os12g34128 // LOC_Os04g25540 // LOC_Os03g59660 // LOC_Os11g31650 // LOC_Os02g12670 // LOC_Os03g59720 // …
GO:0005739	C	mitochondrion	38	3060	162	24075	0.00088	0.018	// LOC_Os03g09870 // LOC_Os09g10740 // LOC_Os01g42650 // LOC_Os01g12470 // LOC_Os02g20860 // LOC_Os02g06650 // LOC_Os06g45670 // LOC_Os03g02390 // LOC_Os01g49190 // LOC_Os05g02050 // LOC_Os02g48720 // LOC_Os01g41610 // LOC_Os01g16900 // LOC_Os06g05080 // LOC_Os11g24450 // LOC_Os01g05060 // LOC_Os01g19770 // LOC_Os02g38200 // LOC_Os02g13300 // LOC_Os01g34390 // LOC_Os11g04440 // LOC_Os05g38210 // …
GO:0005576	C	extracellular region	53	3060	251	24075	0.00086	0.018	// LOC_Os12g01730 // LOC_Os07g11360 // LOC_Os06g45160 // LOC_Os10g40090 // LOC_Os04g26190 // LOC_Os01g44330 // LOC_Os06g45290 // LOC_Os04g25190 // LOC_Os04g26220 // LOC_Os01g60770 // LOC_Os03g18640 // LOC_Os07g40100 // LOC_Os09g39520 // LOC_Os04g25150 // LOC_Os03g01640 // LOC_Os12g15680 // LOC_Os04g51510 // LOC_Os06g36240 // LOC_Os06g45190 // LOC_Os06g45200 // LOC_Os03g01630 // LOC_Os06g45150 // …
GO:0031967	C	organelle envelope	30	3060	142	24075	0.01	0.16	// LOC_Os03g09870 // LOC_Os09g10740 // LOC_Os01g42650 // LOC_Os01g12470 // LOC_Os06g05080 // LOC_Os03g01016 // LOC_Os03g02390 // LOC_Os01g49190 // LOC_Os05g02050 // LOC_Os02g48720 // LOC_Os01g41610 // LOC_Os10g22039 // LOC_Os02g06650 // LOC_Os11g24450 // LOC_Os01g19770 // LOC_Os02g13300 // LOC_Os01g34390 // LOC_Os01g40570 // LOC_Os12g33020 // LOC_Os05g47980 // LOC_Os07g41330 // LOC_Os05g02060 // …
GO:0005615	C	extracellular space	5	3060	8	24075	0.011	0.16	// LOC_Os07g11360 // LOC_Os06g36240 // LOC_Os04g32680 // LOC_Os07g40100 // LOC_Os09g39950
GO:0005618	C	cell wall	20	3060	82	24075	0.0095	0.16	// LOC_Os11g43830 // LOC_Os07g49100 // LOC_Os09g26360 // LOC_Os03g13570 // LOC_Os04g51510 // LOC_Os03g19610 // LOC_Os03g18860 // LOC_Os06g48170 // LOC_Os03g28090 // LOC_Os08g34910 // LOC_Os05g11470 // LOC_Os11g45730 // LOC_Os11g45720 // LOC_Os02g03550 // LOC_Os11g08760 // LOC_Os04g38560 // LOC_Os04g54850 // LOC_Os08g13980 // LOC_Os04g35770 // LOC_Os12g37660
GO:0031975	C	envelope	33	3060	167	24075	0.016	0.22	// LOC_Os03g09870 // LOC_Os09g10740 // LOC_Os01g42650 // LOC_Os01g12470 // LOC_Os02g06650 // LOC_Os03g01016 // LOC_Os03g02390 // LOC_Os01g49190 // LOC_Os06g08900 // LOC_Os05g02050 // LOC_Os02g48720 // LOC_Os01g41610 // LOC_Os10g22039 // LOC_Os06g05080 // LOC_Os11g24450 // LOC_Os06g08890 // LOC_Os01g19770 // LOC_Os02g13300 // LOC_Os01g34390 // LOC_Os01g40570 // LOC_Os12g33020 // LOC_Os05g47980 // …
GO:0030312	C	external encapsulating structure	23	3060	107	24075	0.019	0.24	// LOC_Os11g08760 // LOC_Os06g08900 // LOC_Os04g51510 // LOC_Os03g19610 // LOC_Os05g11470 // LOC_Os03g28090 // LOC_Os11g45720 // LOC_Os12g37660 // LOC_Os09g26360 // LOC_Os03g13570 // LOC_Os06g08890 // LOC_Os03g18860 // LOC_Os09g26160 // LOC_Os04g54850 // LOC_Os08g13980 // LOC_Os04g35770 // LOC_Os11g43830 // LOC_Os07g49100 // LOC_Os06g48170 // LOC_Os11g45730 // LOC_Os02g03550 // LOC_Os04g38560 // …
GO:0005783	C	endoplasmic reticulum	25	3060	123	24075	0.026	0.3	// LOC_Os03g56900 // LOC_Os02g19990 // LOC_Os04g57420 // LOC_Os03g56820 // LOC_Os01g63240 // LOC_Os07g14270 // LOC_Os07g43460 // LOC_Os05g32120 // LOC_Os05g45050 // LOC_Os07g01150 // LOC_Os07g04910 // LOC_Os05g24770 // LOC_Os03g03370 // LOC_Os01g07720 // LOC_Os08g17870 // LOC_Os11g48020 // LOC_Os02g21650 // LOC_Os07g15540 // LOC_Os12g43363 // LOC_Os12g40500 // LOC_Os04g29920 // LOC_Os03g38930 // …
GO:0044421	C	extracellular region part	5	3060	12	24075	0.035	0.39	// LOC_Os07g11360 // LOC_Os06g36240 // LOC_Os04g32680 // LOC_Os07g40100 // LOC_Os09g39950
GO:0030529	C	ribonucleoprotein complex	69	3060	438	24075	0.057	0.59	// LOC_Os10g35690 // LOC_Os11g19220 // LOC_Os01g62350 // LOC_Os09g24408 // LOC_Os04g32960 // LOC_Os12g30490 // LOC_Os03g52400 // LOC_Os01g14830 // LOC_Os04g38750 // LOC_Os12g21798 // LOC_Os07g42450 // LOC_Os01g69950 // LOC_Os06g34780 // LOC_Os12g37610 // LOC_Os03g12020 // LOC_Os08g10608 // LOC_Os08g02840 // LOC_Os03g41612 // LOC_Os07g01260 // LOC_Os07g12250 // LOC_Os07g38420 // LOC_Os01g19840 // …
GO:0005856	C	cytoskeleton	14	3060	71	24075	0.094	0.92	// LOC_Os03g64290 // LOC_Os10g25565 // LOC_Os03g11970 // LOC_Os04g46079 // LOC_Os04g01150 // LOC_Os10g17660 // LOC_Os05g06450 // LOC_Os08g03440 // LOC_Os05g46030 // LOC_Os04g38880 // LOC_Os03g45920 // LOC_Os10g17680 // LOC_Os07g23200 // LOC_Os06g29350
GO:0031974	C	membrane-enclosed lumen	9	3060	80	24075	0.69	1	// LOC_Os11g04440 // LOC_Os05g38210 // LOC_Os05g43450 // LOC_Os01g48700 // LOC_Os01g05060 // LOC_Os03g32590 // LOC_Os09g38500 // LOC_Os05g02050 // LOC_Os01g62820
GO:0005794	C	Golgi apparatus	8	3060	56	24075	0.44	1	// LOC_Os04g55200 // LOC_Os02g12570 // LOC_Os02g39200 // LOC_Os03g59660 // LOC_Os05g37120 // LOC_Os03g57040 // LOC_Os02g55470 // LOC_Os01g21850
GO:0043231	C	intracellular membrane-bounded organelle	235	3060	2296	24075	1	1	// LOC_Os03g09870 // LOC_Os04g47059 // LOC_Os03g12570 // LOC_Os01g12470 // LOC_Os04g54900 // LOC_Os06g12910 // LOC_Os08g38590 // LOC_Os02g06650 // LOC_Os01g63240 // LOC_Os03g01016 // LOC_Os04g38750 // LOC_Os05g50220 // LOC_Os02g36924 // LOC_Os04g31040 // LOC_Os03g56900 // LOC_Os07g41330 // LOC_Os01g62820 // LOC_Os05g42180 // LOC_Os03g60130 // LOC_Os09g37910 // LOC_Os01g17402 // LOC_Os05g51850 // …
GO:0043232	C	intracellular non-membrane-bounded organelle	105	3060	1494	24075	1	1	// LOC_Os03g12570 // LOC_Os09g24408 // LOC_Os05g48050 // LOC_Os04g38750 // LOC_Os03g08440 // LOC_Os06g04030 // LOC_Os07g12250 // LOC_Os05g51850 // LOC_Os08g01859 // LOC_Os01g59730 // LOC_Os12g34128 // LOC_Os04g25540 // LOC_Os11g31650 // LOC_Os03g59720 // LOC_Os06g02510 // LOC_Os04g16818 // LOC_Os03g54091 // LOC_Os08g33920 // LOC_Os04g01150 // LOC_Os03g60100 // LOC_Os08g22660 // LOC_Os12g42180 // …
GO:0043233	C	organelle lumen	8	3060	70	24075	0.67	1	// LOC_Os11g04440 // LOC_Os05g38210 // LOC_Os05g43450 // LOC_Os01g48700 // LOC_Os01g05060 // LOC_Os03g32590 // LOC_Os09g38500 // LOC_Os01g62820
GO:0005829	C	cytosol	7	3060	34	24075	0.17	1	// LOC_Os10g34670 // LOC_Os06g04510 // LOC_Os05g44922 // LOC_Os06g13810 // LOC_Os01g53680 // LOC_Os04g39420 // LOC_Os06g05860
GO:0044428	C	nuclear part	11	3060	97	24075	0.69	1	// LOC_Os01g48700 // LOC_Os05g06350 // LOC_Os11g19220 // LOC_Os01g28690 // LOC_Os02g03340 // LOC_Os07g38420 // LOC_Os05g43450 // LOC_Os03g32590 // LOC_Os03g01016 // LOC_Os02g52250 // LOC_Os01g62820
GO:0044424	C	intracellular part	442	3060	3529	24075	0.63	1	// LOC_Os11g19220 // LOC_Os01g12470 // LOC_Os08g38590 // LOC_Os03g01016 // LOC_Os01g62820 // LOC_Os03g44420 // LOC_Os02g50350 // LOC_Os08g01859 // LOC_Os11g24450 // LOC_Os01g59730 // LOC_Os12g06270 // LOC_Os02g35660 // LOC_Os01g19770 // LOC_Os11g31650 // LOC_Os02g12670 // LOC_Os03g59720 // LOC_Os01g48700 // LOC_Os03g03370 // LOC_Os12g33020 // LOC_Os01g05970 // LOC_Os04g39420 // LOC_Os09g24660 // …
GO:0044422	C	organelle part	114	3060	1521	24075	1	1	// LOC_Os03g09870 // LOC_Os03g12570 // LOC_Os01g12470 // LOC_Os03g01016 // LOC_Os11g19220 // LOC_Os03g08440 // LOC_Os01g62820 // LOC_Os06g04030 // LOC_Os05g02300 // LOC_Os05g51850 // LOC_Os06g05080 // LOC_Os11g24450 // LOC_Os01g19770 // LOC_Os01g48700 // LOC_Os04g16818 // LOC_Os04g44200 // LOC_Os12g33020 // LOC_Os07g41330 // LOC_Os05g02060 // LOC_Os08g39430 // LOC_Os12g42180 // LOC_Os05g08410 // …
GO:0043229	C	intracellular organelle	319	3060	2859	24075	0.99	1	// LOC_Os03g09870 // LOC_Os04g47059 // LOC_Os03g12570 // LOC_Os01g12470 // LOC_Os04g54900 // LOC_Os10g38238 // LOC_Os08g22660 // LOC_Os08g38590 // LOC_Os05g48050 // LOC_Os02g06650 // LOC_Os01g63240 // LOC_Os03g01016 // LOC_Os04g38750 // LOC_Os05g50220 // LOC_Os07g25450 // LOC_Os02g36924 // LOC_Os04g31040 // LOC_Os03g08440 // LOC_Os03g56900 // LOC_Os07g41330 // LOC_Os04g52770 // LOC_Os05g42180 // …
GO:0005622	C	intracellular	551	3060	4116	24075	0.11	1	// LOC_Os11g19220 // LOC_Os06g04920 // LOC_Os01g12470 // LOC_Os08g38590 // LOC_Os03g01016 // LOC_Os01g62820 // LOC_Os03g44420 // LOC_Os02g50350 // LOC_Os08g01859 // LOC_Os11g24450 // LOC_Os01g59730 // LOC_Os12g06270 // LOC_Os02g35660 // LOC_Os01g19770 // LOC_Os11g31650 // LOC_Os02g12670 // LOC_Os03g59720 // LOC_Os01g48700 // LOC_Os03g03370 // LOC_Os03g17150 // LOC_Os12g33020 // LOC_Os01g05970 // …
GO:0043227	C	membrane-bounded organelle	236	3060	2319	24075	1	1	// LOC_Os03g09870 // LOC_Os04g47059 // LOC_Os03g12570 // LOC_Os01g12470 // LOC_Os04g54900 // LOC_Os06g12910 // LOC_Os08g38590 // LOC_Os02g06650 // LOC_Os01g63240 // LOC_Os03g01016 // LOC_Os04g38750 // LOC_Os05g50220 // LOC_Os02g36924 // LOC_Os04g31040 // LOC_Os03g56900 // LOC_Os07g41330 // LOC_Os01g62820 // LOC_Os05g42180 // LOC_Os03g60130 // LOC_Os09g37910 // LOC_Os01g17402 // LOC_Os05g51850 // …
GO:0012505	C	endomembrane system	13	3060	104	24075	0.57	1	// LOC_Os07g15540 // LOC_Os05g06350 // LOC_Os04g55200 // LOC_Os01g28690 // LOC_Os12g40500 // LOC_Os02g39200 // LOC_Os03g48010 // LOC_Os03g01016 // LOC_Os05g37120 // LOC_Os03g59660 // LOC_Os03g57040 // LOC_Os07g43010 // LOC_Os01g21850
GO:0005840	C	ribosome	60	3060	397	24075	0.12	1	// LOC_Os10g35690 // LOC_Os01g62350 // LOC_Os09g24408 // LOC_Os05g48050 // LOC_Os12g30490 // LOC_Os03g52400 // LOC_Os01g14830 // LOC_Os04g38750 // LOC_Os12g21798 // LOC_Os07g42450 // LOC_Os01g69950 // LOC_Os06g34780 // LOC_Os12g37610 // LOC_Os03g12020 // LOC_Os08g10608 // LOC_Os08g02840 // LOC_Os03g41612 // LOC_Os07g12250 // LOC_Os01g19840 // LOC_Os12g32380 // LOC_Os08g01859 // LOC_Os03g08440 // …
GO:0044446	C	intracellular organelle part	114	3060	1521	24075	1	1	// LOC_Os03g09870 // LOC_Os03g12570 // LOC_Os01g12470 // LOC_Os03g01016 // LOC_Os11g19220 // LOC_Os03g08440 // LOC_Os01g62820 // LOC_Os06g04030 // LOC_Os05g02300 // LOC_Os05g51850 // LOC_Os06g05080 // LOC_Os11g24450 // LOC_Os01g19770 // LOC_Os01g48700 // LOC_Os04g16818 // LOC_Os04g44200 // LOC_Os12g33020 // LOC_Os07g41330 // LOC_Os05g02060 // LOC_Os08g39430 // LOC_Os12g42180 // LOC_Os05g08410 // …
GO:0043226	C	organelle	319	3060	2859	24075	0.99	1	// LOC_Os03g09870 // LOC_Os04g47059 // LOC_Os03g12570 // LOC_Os01g12470 // LOC_Os04g54900 // LOC_Os10g38238 // LOC_Os08g22660 // LOC_Os08g38590 // LOC_Os05g48050 // LOC_Os02g06650 // LOC_Os01g63240 // LOC_Os03g01016 // LOC_Os04g38750 // LOC_Os05g50220 // LOC_Os07g25450 // LOC_Os02g36924 // LOC_Os04g31040 // LOC_Os03g08440 // LOC_Os03g56900 // LOC_Os07g41330 // LOC_Os04g52770 // LOC_Os05g42180 // …
GO:0005634	C	nucleus	149	3060	1884	24075	1	1	// LOC_Os04g47059 // LOC_Os03g12570 // LOC_Os01g17402 // LOC_Os04g54900 // LOC_Os09g24660 // LOC_Os08g38590 // LOC_Os03g01016 // LOC_Os02g36924 // LOC_Os11g19220 // LOC_Os01g62820 // LOC_Os05g42180 // LOC_Os03g60130 // LOC_Os05g51850 // LOC_Os02g15760 // LOC_Os07g05010 // LOC_Os05g23670 // LOC_Os02g35660 // LOC_Os06g44320 // LOC_Os06g51220 // LOC_Os01g48700 // LOC_Os05g43920 // LOC_Os05g14860 // …
GO:0043228	C	non-membrane-bounded organelle	105	3060	1494	24075	1	1	// LOC_Os03g12570 // LOC_Os09g24408 // LOC_Os05g48050 // LOC_Os04g38750 // LOC_Os03g08440 // LOC_Os06g04030 // LOC_Os07g12250 // LOC_Os05g51850 // LOC_Os08g01859 // LOC_Os01g59730 // LOC_Os12g34128 // LOC_Os04g25540 // LOC_Os11g31650 // LOC_Os03g59720 // LOC_Os06g02510 // LOC_Os04g16818 // LOC_Os03g54091 // LOC_Os08g33920 // LOC_Os04g01150 // LOC_Os03g60100 // LOC_Os08g22660 // LOC_Os12g42180 // …
GO:0009536	C	plastid	7	3060	37	24075	0.22	1	// LOC_Os03g14120 // LOC_Os04g31040 // LOC_Os04g34460 // LOC_Os04g38750 // LOC_Os02g42570 // LOC_Os10g42500 // LOC_Os10g21268
GO:0009579	C	thylakoid	5	3060	93	24075	0.99	1	// LOC_Os04g35530 // LOC_Os07g17390 // LOC_Os04g44200 // LOC_Os08g39430 // LOC_Os06g01850
GO:0005886	C	plasma membrane	8	3060	44	24075	0.23	1	// LOC_Os06g43850 // LOC_Os01g33960 // LOC_Os03g06160 // LOC_Os01g67364 // LOC_Os03g07480 // LOC_Os10g39870 // LOC_Os10g26470 // LOC_Os04g42310
GO:0070013	C	intracellular organelle lumen	8	3060	70	24075	0.67	1	// LOC_Os11g04440 // LOC_Os05g38210 // LOC_Os05g43450 // LOC_Os01g48700 // LOC_Os01g05060 // LOC_Os03g32590 // LOC_Os09g38500 // LOC_Os01g62820

## Sheet: Turquoise_KEGG
	ID	Description	GeneRatio	BgRatio	pvalue	p.adjust	qvalue	geneID	Count
dosa00190	dosa00190	Oxidative phosphorylation	41/709	107/4520	7.67697e-09	8.3679e-07	7.75778e-07	Os01t0527700-01/Os01t0587000-01/Os01t0600000-01/Os01t0612200-01/Os01t0685800-01/Os01t0720300-00/Os01t0935700-01/Os02t0175400-01/Os02t0797300-01/Os02t0816800-01/Os02t0824700-01/Os03t0192400-01/Os03t0251500-01/Os03t0295500-01/Os03t0713400-01/Os03t0774200-01/Os03t0806900-01/Os04t0398500-01/Os04t0643100-01/Os04t0660600-01/Os04t0687100-01/Os05t0301700-01/Os05t0319800-01/Os05t0377000-01/Os05t0438500-01…	41
dosa00020	dosa00020	Citrate cycle (TCA cycle)	23/709	56/4520	4.02958e-06	0.000219612	0.0002036	Os01t0276100-01/Os01t0328700-01/Os01t0337900-01/Os02t0105200-01/Os02t0514700-00/Os02t0595500-01/Os02t0621700-01/Os02t0739600-01/Os03t0136900-01/Os03t0337900-01/Os03t0645100-01/Os04t0390000-01/Os04t0394200-01/Os04t0479200-01/Os05t0573200-00/Os06t0105400-01/Os06t0499900-01/Os07t0410100-01/Os07t0577700-01/Os07t0695800-01/Os08t0536000-01/Os09t0408600-01/Os12t0632700-01	23
dosa01200	dosa01200	Carbon metabolism	66/709	253/4520	8.0758e-06	0.000293421	0.000272027	Os01t0110700-01/Os01t0159400-01/Os01t0188400-01/Os01t0276100-01/Os01t0276700-01/Os01t0328700-01/Os01t0337900-01/Os01t0682500-01/Os01t0905800-01/Os01t0926300-01/Os02t0105200-01/Os02t0244700-01/Os02t0514700-00/Os02t0595500-01/Os02t0601300-01/Os02t0621700-01/Os02t0739600-01/Os03t0133900-01/Os03t0136900-01/Os03t0169100-01/Os03t0189400-01/Os03t0189600-01/Os03t0215800-01/Os03t0337900-01/Os03t0645100-01…	66
dosa00620	dosa00620	Pyruvate metabolism	22/709	80/4520	0.00459967	0.125341	0.116202	Os01t0110700-01/Os01t0188400-01/Os01t0276700-01/Os01t0328700-01/Os01t0337900-01/Os02t0105200-01/Os02t0244700-01/Os02t0739600-01/Os03t0337900-01/Os03t0645100-01/Os04t0671700-01/Os04t0677500-01/Os05t0186300-01/Os06t0105400-01/Os06t0264700-01/Os06t0270900-01/Os06t0499900-01/Os07t0410100-01/Os08t0366000-01/Os08t0536000-01/Os09t0408600-01/Os12t0632700-01	22
dosa04933	dosa04933	AGE-RAGE signaling pathway in diabetic complications	6/709	12/4520	0.00576429	0.125661	0.116499	Os02t0312600-01/Os02t0834000-01/Os03t0289300-00/Os06t0234200-01/Os07t0694000-01/Os11t0271100-01	6
dosa00010	dosa00010	Glycolysis / Gluconeogenesis	32/709	136/4520	0.00986804	0.172541	0.159961	Os01t0276700-01/Os01t0328700-01/Os01t0337900-01/Os01t0847600-01/Os01t0905800-01/Os02t0105200-01/Os02t0601300-01/Os02t0739600-01/Os03t0189400-01/Os03t0189600-01/Os03t0645100-01/Os04t0469500-01/Os04t0603000-00/Os04t0677500-01/Os05t0375100-00/Os05t0402700-01/Os05t0522500-01/Os06t0105400-01/Os06t0136600-01/Os06t0247500-01/Os06t0270900-01/Os06t0499900-01/Os07t0410100-01/Os07t0621800-01/Os07t0693100-01…	32
dosa00040	dosa00040	Pentose and glucuronate interconversions	19/709	71/4520	0.0110806	0.172541	0.159961	Os01t0517500-01/Os01t0847600-01/Os02t0117700-01/Os02t0214400-01/Os03t0169100-01/Os03t0300500-01/Os03t0425600-00/Os04t0458900-01/Os06t0144200-01/Os06t0545200-00/Os06t0545400-01/Os06t0545800-01/Os06t0583900-01/Os06t0611500-01/Os07t0691100-01/Os08t0327200-01/Os11t0683700-01/Os11t0683800-01/Os12t0563700-01	19
dosa00562	dosa00562	Inositol phosphate metabolism	15/709	57/4520	0.0261928	0.331358	0.307198	Os11t0593000-01/Os02t0523800-01/Os03t0262000-01/Os03t0289300-00/Os03t0587000-01/Os03t0726200-01/Os03t0826600-01/Os06t0561000-01/Os07t0694000-01/Os08t0556700-01/Os10t0369900-01/Os11t0145000-01/Os11t0146100-01/Os11t0309000-01/Os12t0141100-01	15
dosa00260	dosa00260	Glycine, serine and threonine metabolism	16/709	63/4520	0.0303967	0.331358	0.307198	Os01t0328700-01/Os01t0337900-01/Os01t0682500-01/Os01t0693800-01/Os03t0713000-00/Os03t0797000-01/Os04t0476100-01/Os06t0667600-01/Os07t0182100-01/Os08t0424500-01/Os09t0498500-00/Os10t0516100-01/Os11t0128800-01/Os12t0135051-00/Os12t0409000-01/Os12t0502400-01	16
dosa04070	dosa04070	Phosphatidylinositol signaling system	15/709	58/4520	0.0303998	0.331358	0.307198	Os01t0267900-01/Os02t0523800-01/Os03t0262000-01/Os03t0289300-00/Os03t0319300-01/Os03t0587000-01/Os03t0726200-01/Os04t0634700-01/Os07t0694000-01/Os08t0178700-01/Os08t0556700-01/Os11t0145000-01/Os11t0146100-01/Os11t0309000-01/Os12t0141100-01	15
dosa00240	dosa00240	Pyrimidine metabolism	14/709	54/4520	0.0350808	0.347619	0.322274	Os01t0616900-00/Os01t0709400-01/Os01t0951400-01/Os01t0965400-01/Os02t0479300-01/Os02t0736400-01/Os03t0113100-01/Os03t0378000-01/Os04t0105500-01/Os05t0455700-01/Os05t0595400-01/Os07t0204500-01/Os08t0504400-01/Os08t0530000-01	14
dosa01230	dosa01230	Biosynthesis of amino acids	45/709	224/4520	0.041917	0.380746	0.352985	Os01t0276100-01/Os01t0276500-01/Os01t0276700-01/Os01t0693800-01/Os01t0905800-01/Os01t0926300-01/Os02t0266000-01/Os02t0595500-01/Os02t0601300-01/Os03t0126000-01/Os03t0133900-01/Os03t0136900-01/Os03t0169100-01/Os03t0215800-01/Os03t0231600-01/Os03t0245100-01/Os03t0254800-01/Os03t0389700-01/Os03t0713000-00/Os03t0747800-01/Os03t0781400-01/Os03t0797000-01/Os03t0826500-01/Os04t0165700-01/Os04t0463500-01…	45
dosa00280	dosa00280	Valine, leucine and isoleucine degradation	12/709	46/4520	0.0468866	0.393126	0.364462	Os01t0328700-01/Os01t0337900-01/Os03t0231600-01/Os04t0559400-01/Os05t0125500-01/Os05t0565500-01/Os06t0270900-01/Os06t0677400-01/Os08t0544900-01/Os10t0549500-00/Os10t0552900-01/Os12t0183100-01	12
dosa04144	dosa04144	Endocytosis	30/709	146/4520	0.066988	0.52155	0.483523	Os01t0141100-01/Os01t0286000-01/Os01t0658500-01/Os01t0738600-01/Os01t0848700-01/Os02t0159900-01/Os02t0596500-01/Os02t0722500-01/Os03t0119100-01/Os03t0257500-01/Os03t0262000-01/Os03t0278400-01/Os03t0819900-01/Os04t0117300-01/Os04t0669300-01/Os05t0105100-01/Os05t0382000-01/Os05t0516600-01/Os06t0717100-01/Os07t0414800-01/Os07t0634200-01/Os08t0425100-01/Os08t0537600-01/Os09t0281700-01/Os09t0547200-01…	30
dosa00640	dosa00640	Propanoate metabolism	8/709	29/4520	0.0722063	0.524699	0.486443	Os01t0159400-01/Os01t0328700-01/Os01t0337900-01/Os02t0621700-01/Os06t0677400-01/Os07t0577700-01/Os10t0552900-01/Os12t0183100-01	8
dosa04130	dosa04130	SNARE interactions in vesicular transport	9/709	35/4520	0.0856611	0.528028	0.489529	Os01t0560200-01/Os01t0707300-01/Os01t0964000-01/Os02t0209900-01/Os02t0803600-01/Os06t0174400-01/Os06t0590500-01/Os08t0533700-01/Os09t0359700-00	9
dosa00030	dosa00030	Pentose phosphate pathway	13/709	56/4520	0.0891324	0.528028	0.489529	Os01t0665400-01/Os01t0905800-01/Os01t0926300-01/Os03t0169100-01/Os03t0781400-01/Os04t0469500-01/Os04t0485300-01/Os05t0402700-01/Os06t0247500-01/Os07t0604000-01/Os09t0529100-01/Os10t0163340-01/Os10t0189100-01	13
dosa00290	dosa00290	Valine, leucine and isoleucine biosynthesis	5/709	16/4520	0.0919677	0.528028	0.489529	Os03t0231600-01/Os03t0713000-00/Os04t0559400-01/Os10t0549500-00/Os11t0256050-00	5
dosa00053	dosa00053	Ascorbate and aldarate metabolism	12/709	51/4520	0.0920416	0.528028	0.489529	Os01t0816700-01/Os02t0707100-01/Os03t0425600-00/Os03t0587000-01/Os06t0270900-01/Os06t0561000-01/Os06t0567200-01/Os07t0694700-01/Os08t0151800-01/Os08t0519100-01/Os08t0557600-01/Os12t0482700-01	12
dosa00920	dosa00920	Sulfur metabolism	9/709	37/4520	0.113727	0.584875	0.542231	Os03t0133900-01/Os03t0215800-01/Os03t0747800-01/Os04t0165700-01/Os04t0535400-01/Os05t0533500-01/Os07t0558200-01/Os07t0573100-01/Os12t0442800-01	9
dosa00770	dosa00770	Pantothenate and CoA biosynthesis	7/709	27/4520	0.117803	0.584875	0.542231	Os02t0134000-00/Os02t0736400-01/Os03t0231600-01/Os03t0851800-01/Os04t0559400-01/Os10t0549500-00/Os11t0256050-00	7
dosa04145	dosa04145	Phagosome	16/709	75/4520	0.118048	0.584875	0.542231	Os01t0587000-01/Os02t0175400-01/Os02t0312600-01/Os02t0824700-01/Os02t0834000-01/Os03t0219300-01/Os03t0251500-01/Os03t0661300-01/Os04t0643100-01/Os04t0660600-01/Os05t0480700-01/Os05t0516600-01/Os06t0234200-01/Os07t0246200-01/Os09t0347700-01/Os12t0173366-01	16
dosa01210	dosa01210	2-Oxocarboxylic acid metabolism	12/709	54/4520	0.128734	0.610087	0.565604	Os01t0276100-01/Os02t0595500-01/Os03t0136900-01/Os03t0231600-01/Os04t0171800-01/Os04t0479200-01/Os04t0559400-01/Os05t0573200-00/Os06t0548000-01/Os07t0461900-01/Os10t0549500-00/Os11t0256050-00	12
dosa00906	dosa00906	Carotenoid biosynthesis	7/709	28/4520	0.137002	0.622218	0.576851	Os01t0566500-01/Os02t0190600-00/Os02t0817900-01/Os03t0125100-01/Os03t0810800-01/Os04t0379700-01/Os12t0405200-01	7
dosa00561	dosa00561	Glycerolipid metabolism	15/709	72/4520	0.14772	0.644061	0.597101	Os01t0666000-01/Os01t0682500-01/Os01t0847600-01/Os02t0676000-01/Os02t0802700-01/Os03t0214400-01/Os03t0268300-01/Os03t0719400-01/Os04t0634700-01/Os05t0448300-01/Os06t0270900-01/Os08t0178700-01/Os08t0359100-01/Os10t0497100-01/Os12t0262700-01	15
dosa00730	dosa00730	Thiamine metabolism	5/709	19/4520	0.165475	0.693724	0.643143	Os01t0356500-01/Os03t0130400-01/Os03t0306900-01/Os08t0118900-01/Os08t0288200-01	5
dosa00310	dosa00310	Lysine degradation	6/709	25/4520	0.187133	0.728122	0.675034	Os01t0328700-01/Os01t0337900-01/Os02t0514700-00/Os04t0394200-01/Os06t0270900-01/Os09t0498500-00	6
dosa03020	dosa03020	RNA polymerase	8/709	36/4520	0.192544	0.728122	0.675034	Os03t0609200-00/Os03t0711700-00/Os03t0845700-01/Os05t0400700-01/Os06t0697400-01/Os09t0110400-01/Os11t0194800-01/Os11t0615100-01	8
dosa00760	dosa00760	Nicotinate and nicotinamide metabolism	5/709	20/4520	0.193959	0.728122	0.675034	Os01t0709400-01/Os07t0167100-01/Os07t0204500-01/Os09t0345700-01/Os12t0179800-01	5
dosa00564	dosa00564	Glycerophospholipid metabolism	19/709	99/4520	0.200401	0.728122	0.675034	Os11t0593000-01/Os01t0175000-01/Os01t0183000-01/Os01t0666000-01/Os01t0939600-01/Os01t0971600-01/Os02t0676000-01/Os03t0101900-01/Os03t0119100-01/Os03t0730000-01/Os03t0826600-01/Os04t0224900-01/Os04t0634700-01/Os04t0667000-01/Os05t0448300-01/Os08t0178700-01/Os08t0359100-01/Os10t0497100-01/Os12t0121300-01	19
dosa02010	dosa02010	ABC transporters	5/709	21/4520	0.223993	0.76028	0.704847	Os01t0173900-01/Os01t0534700-00/Os02t0693700-01/Os04t0209300-01/Os05t0196100-01	5
dosa00052	dosa00052	Galactose metabolism	10/709	49/4520	0.230177	0.76028	0.704847	Os02t0117700-01/Os04t0413200-01/Os04t0469500-01/Os04t0535600-01/Os05t0375100-00/Os05t0522500-01/Os07t0687900-01/Os08t0374800-01/Os09t0323000-01/Os10t0189100-01	10
dosa00900	dosa00900	Terpenoid backbone biosynthesis	10/709	49/4520	0.230177	0.76028	0.704847	Os01t0106900-01/Os01t0695300-01/Os01t0802100-01/Os02t0713900-01/Os05t0577200-01/Os07t0580900-01/Os07t0607700-01/Os08t0512700-01/Os08t0544900-01/Os12t0105500-01	10
dosa03022	dosa03022	Basal transcription factors	9/709	44/4520	0.244504	0.783852	0.7267	Os01t0846900-01/Os02t0125800-01/Os03t0441000-01/Os03t0603300-01/Os03t0737600-01/Os04t0680000-00/Os05t0144800-01/Os05t0509900-01/Os12t0580300-01	9
dosa03050	dosa03050	Proteasome	12/709	62/4520	0.258541	0.792124	0.734369	Os01t0267200-01/Os02t0133800-01/Os02t0325100-01/Os03t0180400-01/Os03t0214600-01/Os04t0661900-01/Os06t0192600-01/Os06t0643100-01/Os07t0435100-01/Os07t0691800-01/Os08t0529100-01/Os09t0538200-01	12
dosa00500	dosa00500	Starch and sucrose metabolism	27/709	152/4520	0.268214	0.792124	0.734369	Os01t0376700-01/Os01t0730300-01/Os01t0851700-01/Os01t0894300-01/Os02t0117700-01/Os02t0143100-01/Os02t0778600-01/Os03t0141200-01/Os03t0224300-01/Os03t0758100-01/Os04t0413200-01/Os04t0497200-01/Os04t0535600-01/Os04t0624600-01/Os05t0375100-00/Os05t0393700-01/Os05t0522500-01/Os07t0627000-01/Os07t0662900-01/Os08t0345800-01/Os08t0473900-01/Os09t0469400-01/Os09t0569200-01/Os10t0189100-01/Os10t0465700-01…	27
dosa04626	dosa04626	Plant-pathogen interaction	36/709	208/4520	0.282755	0.792124	0.734369	Os11t0591200-01/Os01t0267900-01/Os01t0323100-01/Os01t0505600-01/Os01t0808400-01/Os01t0832300-00/Os01t0949500-01/Os02t0198200-01/Os02t0469600-01/Os02t0504700-00/Os03t0319300-01/Os03t0646300-01/Os03t0789000-00/Os03t0808600-01/Os03t0844100-01/Os03t0851100-01/Os04t0560600-01/Os06t0154500-01/Os07t0480900-01/Os08t0144100-01/Os08t0453700-00/Os08t0540400-01/Os08t0560700-01/Os09t0481700-01/Os09t0514200-01…	36
dosa04146	dosa04146	Peroxisome	16/709	87/4520	0.282901	0.792124	0.734369	Os01t0159400-01/Os01t0505400-01/Os02t0123200-01/Os04t0614000-01/Os05t0573200-00/Os07t0665200-01/Os08t0500100-01/Os08t0561700-01/Os08t0566900-01/Os09t0133200-01/Os09t0315000-01/Os09t0498500-00/Os11t0131200-01/Os12t0127900-00/Os12t0168700-01/Os12t0508100-00	16
dosa00230	dosa00230	Purine metabolism	17/709	93/4520	0.283421	0.792124	0.734369	Os01t0276700-01/Os01t0709400-01/Os03t0130400-01/Os03t0174500-01/Os03t0378000-01/Os03t0390700-01/Os03t0780500-01/Os04t0504000-01/Os04t0677500-01/Os05t0595400-01/Os06t0665500-01/Os07t0204500-01/Os07t0573100-01/Os08t0118900-01/Os08t0288200-01/Os10t0189100-01/Os12t0515600-01	17
dosa00710	dosa00710	Carbon fixation in photosynthetic organisms	14/709	76/4520	0.298676	0.813893	0.754551	Os01t0110700-01/Os01t0188400-01/Os01t0905800-01/Os02t0244700-01/Os02t0601300-01/Os03t0169100-01/Os03t0781400-01/Os04t0234600-01/Os05t0186300-01/Os05t0402700-01/Os06t0548000-01/Os08t0366000-01/Os10t0163340-01/Os12t0632700-01	14
dosa00904	dosa00904	Diterpenoid biosynthesis	8/709	41/4520	0.308946	0.821343	0.761457	Os02t0278700-01/Os02t0569900-01/Os02t0571100-01/Os03t0856700-01/Os05t0178100-01/Os05t0514600-01/Os06t0110000-01/Os06t0570100-01	8
dosa00790	dosa00790	Folate biosynthesis	5/709	25/4520	0.353834	0.918284	0.85133	Os01t0929500-01/Os02t0592200-01/Os03t0111100-01/Os06t0154600-00/Os10t0503200-01	5
dosa00750	dosa00750	Vitamin B6 metabolism	3/709	14/4520	0.380321	0.927653	0.860017	Os01t0693800-01/Os02t0130100-01/Os03t0115500-01	3
dosa00400	dosa00400	Phenylalanine, tyrosine and tryptophan biosynthesis	9/709	50/4520	0.382976	0.927653	0.860017	Os02t0266000-01/Os03t0126000-01/Os03t0254800-01/Os03t0389700-01/Os03t0797000-01/Os03t0826500-01/Os04t0463500-01/Os06t0548000-01/Os07t0182100-01	9
dosa03420	dosa03420	Nucleotide excision repair	9/709	50/4520	0.382976	0.927653	0.860017	Os01t0253600-01/Os02t0125800-01/Os03t0737600-01/Os03t0792600-01/Os04t0680000-00/Os05t0144800-01/Os06t0264300-01/Os09t0407200-01/Os09t0520100-01	9
dosa01040	dosa01040	Biosynthesis of unsaturated fatty acids	6/709	33/4520	0.417297	0.987322	0.915334	Os01t0150200-01/Os01t0159400-01/Os02t0716500-01/Os04t0271200-01/Os04t0379900-01/Os05t0460800-01	6
dosa00590	dosa00590	Arachidonic acid metabolism	3/709	15/4520	0.425726	0.987322	0.915334	Os01t0151500-00/Os01t0929500-01/Os04t0457500-01	3
dosa00510	dosa00510	N-Glycan biosynthesis	6/709	34/4520	0.447169	0.999999	0.927088	Os02t0594900-01/Os02t0798100-00/Os03t0216600-01/Os04t0477500-01/Os04t0576800-01/Os12t0611900-01	6
dosa00740	dosa00740	Riboflavin metabolism	3/709	16/4520	0.469906	0.999999	0.927088	Os11t0549615-01/Os03t0801700-01/Os09t0569100-01	3
dosa00051	dosa00051	Fructose and mannose metabolism	10/709	60/4520	0.471362	0.999999	0.927088	Os01t0894300-01/Os01t0905800-01/Os03t0208900-01/Os04t0469500-01/Os05t0375100-00/Os05t0402700-01/Os05t0522500-01/Os06t0247500-01/Os10t0163340-01/Os11t0600900-01	10
dosa00563	dosa00563	Glycosylphosphatidylinositol (GPI)-anchor biosynthesis	4/709	23/4520	0.497678	0.999999	0.927088	Os01t0907300-01/Os03t0640300-01/Os05t0165400-01/Os12t0596900-01	4
dosa00330	dosa00330	Arginine and proline metabolism	9/709	55/4520	0.502034	0.999999	0.927088	Os02t0611200-01/Os04t0183500-01/Os04t0466600-01/Os04t0498600-01/Os05t0489100-01/Os06t0131300-00/Os06t0270900-01/Os06t0528600-01/Os06t0548000-01	9
dosa00410	dosa00410	beta-Alanine metabolism	7/709	43/4520	0.521931	0.999999	0.927088	Os01t0159400-01/Os02t0736400-01/Os03t0851800-01/Os04t0476100-01/Os06t0270900-01/Os06t0677400-01/Os10t0552900-01	7
dosa00860	dosa00860	Porphyrin and chlorophyll metabolism	6/709	37/4520	0.534211	0.999999	0.927088	Os01t0527700-01/Os01t0631200-01/Os05t0349700-01/Os05t0361200-01/Os08t0496000-01/Os10t0389100-00	6
dosa00350	dosa00350	Tyrosine metabolism	7/709	44/4520	0.547879	0.999999	0.927088	Os03t0189400-01/Os03t0189600-01/Os04t0476100-01/Os06t0548000-01/Os07t0621800-01/Os12t0107500-01/Os12t0210200-01	7
dosa00270	dosa00270	Cysteine and methionine metabolism	17/709	109/4520	0.551928	0.999999	0.927088	Os02t0611200-01/Os03t0133900-01/Os03t0215800-01/Os03t0226800-01/Os03t0231600-01/Os03t0747800-01/Os04t0165700-01/Os04t0498600-01/Os04t0559400-01/Os04t0669900-00/Os05t0533500-01/Os06t0112200-01/Os06t0528600-01/Os06t0548000-01/Os10t0549500-00/Os11t0128800-01/Os12t0632700-01	17
dosa00670	dosa00670	One carbon pool by folate	3/709	18/4520	0.553171	0.999999	0.927088	Os03t0102100-01/Os09t0446800-01/Os12t0409000-01	3
dosa00905	dosa00905	Brassinosteroid biosynthesis	2/709	12/4520	0.583104	0.999999	0.927088	Os02t0204700-00/Os11t0143200-01	2
dosa00565	dosa00565	Ether lipid metabolism	4/709	26/4520	0.599982	0.999999	0.927088	Os11t0593000-01/Os02t0676000-01/Os03t0119100-01/Os03t0826600-01	4
dosa00650	dosa00650	Butanoate metabolism	4/709	26/4520	0.599982	0.999999	0.927088	Os04t0614500-01/Os04t0614600-01/Os08t0544900-01/Os11t0256050-00	4
dosa03430	dosa03430	Mismatch repair	4/709	26/4520	0.599982	0.999999	0.927088	Os01t0253600-01/Os01t0777300-00/Os03t0792600-01/Os09t0520100-01	4
dosa00630	dosa00630	Glyoxylate and dicarboxylate metabolism	10/709	66/4520	0.600568	0.999999	0.927088	Os01t0328700-01/Os01t0337900-01/Os01t0682500-01/Os03t0102100-01/Os03t0136900-01/Os06t0486900-01/Os06t0667600-01/Os10t0516100-01/Os12t0409000-01/Os12t0632700-01	10
dosa00960	dosa00960	Tropane, piperidine and pyridine alkaloid biosynthesis	4/709	27/4520	0.631167	0.999999	0.927088	Os03t0269000-01/Os03t0269100-01/Os04t0476100-01/Os06t0548000-01	4
dosa00460	dosa00460	Cyanoamino acid metabolism	7/709	48/4520	0.644842	0.999999	0.927088	Os01t0151500-00/Os04t0165700-01/Os04t0171800-01/Os04t0457500-01/Os06t0656000-00/Os12t0409000-01/Os12t0420100-01	7
dosa00300	dosa00300	Lysine biosynthesis	2/709	14/4520	0.669704	0.999999	0.927088	Os03t0245100-01/Os11t0128800-01	2
dosa03018	dosa03018	RNA degradation	14/709	97/4520	0.677097	0.999999	0.927088	Os02t0510100-01/Os02t0550700-01/Os02t0805900-01/Os02t0810300-01/Os03t0278500-01/Os03t0316900-01/Os03t0784800-01/Os03t0854200-01/Os04t0469500-01/Os04t0613400-00/Os05t0389300-01/Os06t0136600-01/Os06t0589700-01/Os11t0660300-01	14
dosa00250	dosa00250	Alanine, aspartate and glutamate metabolism	6/709	43/4520	0.687176	0.999999	0.927088	Os03t0174500-01/Os04t0614500-01/Os04t0614600-01/Os06t0265000-01/Os06t0548000-01/Os12t0235800-01	6
dosa00340	dosa00340	Histidine metabolism	2/709	15/4520	0.70724	0.999999	0.927088	Os01t0276500-01/Os06t0270900-01	2
dosa00071	dosa00071	Fatty acid degradation	7/709	51/4520	0.708934	0.999999	0.927088	Os01t0159400-01/Os03t0189400-01/Os03t0189600-01/Os05t0155000-01/Os06t0270900-01/Os07t0621800-01/Os12t0168700-01	7
dosa00062	dosa00062	Fatty acid elongation	5/709	38/4520	0.73341	0.999999	0.927088	Os11t0591200-01/Os01t0150200-01/Os04t0271200-01/Os05t0460800-01/Os10t0472900-01	5
dosa00100	dosa00100	Steroid biosynthesis	5/709	39/4520	0.754664	0.999999	0.927088	Os02t0465400-01/Os03t0231700-01/Os07t0101500-01/Os08t0529800-01/Os11t0707600-01	5
dosa01212	dosa01212	Fatty acid metabolism	10/709	77/4520	0.789027	0.999999	0.927088	Os01t0150200-01/Os01t0159400-01/Os02t0716500-01/Os04t0271200-01/Os04t0379900-01/Os05t0155000-01/Os05t0460800-01/Os06t0596300-01/Os11t0659500-01/Os12t0168700-01	10
dosa04075	dosa04075	Plant hormone signal transduction	33/709	237/4520	0.803185	0.999999	0.927088	Os01t0194300-01/Os01t0221100-01/Os01t0286900-01/Os01t0670800-01/Os01t0753500-01/Os01t0813100-00/Os01t0859500-01/Os02t0194900-00/Os02t0226801-00/Os02t0255500-01/Os02t0512000-01/Os03t0265500-01/Os03t0610900-01/Os03t0633500-00/Os03t0764800-01/Os03t0782500-01/Os05t0207500-01/Os05t0433100-00/Os05t0473000-01/Os05t0489700-01/Os05t0515400-01/Os06t0154500-01/Os06t0166500-01/Os07t0259100-01/Os07t0576100-00…	33
dosa03010	dosa03010	Ribosome	42/709	298/4520	0.805163	0.999999	0.927088	Os01t0153200-00/Os01t0205500-01/Os01t0251100-01/Os01t0304000-01/Os01t0593500-00/Os01t0616500-01/Os01t0812800-01/Os01t0924000-01/Os02t0102400-01/Os02t0677800-01/Os03t0196800-01/Os03t0219900-01/Os03t0341100-01/Os03t0343500-01/Os03t0356300-01/Os03t0612600-01/Os03t0773150-00/Os03t0811800-01/Os03t0815400-01/Os04t0321500-00/Os05t0355500-01/Os05t0388500-01/Os05t0460700-01/Os05t0554100-01/Os05t0557800-01…	42
dosa03440	dosa03440	Homologous recombination	6/709	50/4520	0.818634	0.999999	0.927088	Os01t0253600-01/Os02t0650800-00/Os06t0715600-01/Os07t0692600-01/Os09t0520100-01/Os11t0615800-00	6
dosa00220	dosa00220	Arginine biosynthesis	3/709	27/4520	0.8194	0.999999	0.927088	Os06t0548000-01/Os07t0461900-01/Os12t0235800-01	3
dosa00910	dosa00910	Nitrogen metabolism	3/709	27/4520	0.8194	0.999999	0.927088	Os01t0639900-01/Os04t0412500-01/Os12t0153500-01	3
dosa00073	dosa00073	Cutin, suberine and wax biosynthesis	3/709	28/4520	0.838439	0.999999	0.927088	Os02t0666500-01/Os02t0734400-00/Os06t0254700-01	3
dosa00380	dosa00380	Tryptophan metabolism	7/709	59/4520	0.839906	0.999999	0.927088	Os01t0328700-01/Os01t0337900-01/Os02t0514700-00/Os04t0183500-01/Os04t0394200-01/Os05t0169300-01/Os06t0270900-01	7
dosa00261	dosa00261	Monobactam biosynthesis	1/709	11/4520	0.847271	0.999999	0.927088	Os03t0245100-01	1
dosa00130	dosa00130	Ubiquinone and other terpenoid-quinone biosynthesis	5/709	45/4520	0.856167	0.999999	0.927088	Os03t0839100-01/Os04t0218900-01/Os04t0507800-01/Os08t0245200-01/Os12t0181300-00	5
dosa00531	dosa00531	Glycosaminoglycan degradation	1/709	12/4520	0.871286	0.999999	0.927088	Os12t0578400-01	1
dosa00945	dosa00945	Stilbenoid, diarylheptanoid and gingerol biosynthesis	1/709	12/4520	0.871286	0.999999	0.927088	Os02t0611800-01	1
dosa03040	dosa03040	Spliceosome	24/709	185/4520	0.874343	0.999999	0.927088	Os01t0667800-01/Os02t0126700-01/Os02t0510100-01/Os02t0759800-01/Os02t0789400-01/Os03t0263500-01/Os03t0388000-01/Os03t0397500-01/Os03t0410900-01/Os03t0831900-01/Os05t0389300-01/Os05t0389800-01/Os05t0446300-01/Os06t0235800-00/Os06t0653800-01/Os06t0711600-01/Os07t0237100-00/Os07t0571900-01/Os07t0602600-01/Os08t0127700-01/Os08t0154225-00/Os10t0498600-01/Os11t0704700-01/Os12t0502200-01	24
dosa00950	dosa00950	Isoquinoline alkaloid biosynthesis	2/709	22/4520	0.88127	0.999999	0.927088	Os04t0476100-01/Os06t0548000-01	2
dosa03060	dosa03060	Protein export	6/709	55/4520	0.882527	0.999999	0.927088	Os01t0958100-01/Os05t0509500-01/Os09t0347700-01/Os11t0153700-01/Os11t0620000-01/Os12t0173366-01	6
dosa03410	dosa03410	Base excision repair	4/709	41/4520	0.904248	0.999999	0.927088	Os01t0801100-01/Os02t0774500-01/Os09t0520100-01/Os12t0211400-00	4
dosa00941	dosa00941	Flavonoid biosynthesis	3/709	33/4520	0.909649	0.999999	0.927088	Os02t0611800-01/Os04t0630600-00/Os11t0116300-01	3
dosa00360	dosa00360	Phenylalanine metabolism	4/709	42/4520	0.914087	0.999999	0.927088	Os04t0183500-01/Os04t0476100-01/Os06t0548000-01/Os12t0107500-01	4
dosa04016	dosa04016	MAPK signaling pathway - plant	18/709	149/4520	0.914475	0.999999	0.927088	Os01t0267900-01/Os01t0643800-01/Os02t0226801-00/Os02t0255500-01/Os02t0257500-00/Os03t0319300-01/Os03t0610900-01/Os03t0764800-01/Os03t0799500-01/Os05t0433100-00/Os05t0473000-01/Os05t0539800-01/Os05t0576800-01/Os05t0595400-01/Os06t0154500-01/Os07t0259100-01/Os08t0453700-00/Os12t0162500-01	18
dosa03015	dosa03015	mRNA surveillance pathway	11/709	99/4520	0.925433	0.999999	0.927088	Os01t0939500-00/Os02t0217500-01/Os03t0262100-01/Os03t0278500-01/Os03t0681800-00/Os04t0596500-02/Os06t0219600-01/Os06t0574500-01/Os06t0589700-01/Os07t0237100-00/Os11t0637700-01	11
dosa04136	dosa04136	Autophagy - other	3/709	35/4520	0.929094	0.999999	0.927088	Os04t0497350-01/Os04t0682000-01/Os06t0574500-01	3
dosa00195	dosa00195	Photosynthesis	5/709	53/4520	0.93488	0.999999	0.927088	Os03t0659200-01/Os03t0659233-00/Os03t0685000-01/Os06t0107700-01/Os07t0513000-01	5
dosa00061	dosa00061	Fatty acid biosynthesis	4/709	45/4520	0.93841	0.999999	0.927088	Os04t0379900-01/Os06t0596300-01/Os11t0659500-01/Os12t0168700-01	4
dosa00520	dosa00520	Amino sugar and nucleotide sugar metabolism	17/709	149/4520	0.947144	0.999999	0.927088	Os01t0894300-01/Os02t0117700-01/Os03t0208900-01/Os03t0280800-01/Os03t0330000-01/Os03t0425600-00/Os04t0618200-01/Os04t0636100-01/Os05t0375100-00/Os05t0522500-01/Os06t0187200-01/Os08t0345800-01/Os08t0374800-01/Os08t0496200-00/Os09t0323000-01/Os10t0189100-01/Os11t0600900-01	17
dosa03030	dosa03030	DNA replication	3/709	38/4520	0.951148	0.999999	0.927088	Os01t0253600-01/Os03t0792600-01/Os09t0520100-01	3
dosa00513	dosa00513	Various types of N-glycan biosynthesis	2/709	29/4520	0.955086	0.999999	0.927088	Os02t0577300-00/Os02t0798100-00	2
dosa04712	dosa04712	Circadian rhythm - plant	2/709	29/4520	0.955086	0.999999	0.927088	Os01t0566100-01/Os03t0207300-01	2
dosa03013	dosa03013	RNA transport	17/709	152/4520	0.957087	0.999999	0.927088	Os01t0383900-01/Os01t0918200-01/Os01t0968000-00/Os02t0146600-01/Os03t0262100-01/Os03t0278500-01/Os04t0692500-01/Os05t0592600-01/Os06t0589700-01/Os06t0598900-01/Os06t0704300-01/Os07t0237100-00/Os08t0160000-01/Os09t0482680-01/Os10t0170000-01/Os12t0607100-01/Os12t0617100-01	17
dosa00780	dosa00780	Biotin metabolism	1/709	20/4520	0.967296	0.999999	0.927088	Os10t0560900-01	1
dosa04141	dosa04141	Protein processing in endoplasmic reticulum	21/709	197/4520	0.984939	0.999999	0.927088	Os01t0211800-01/Os01t0830200-01/Os01t0839700-01/Os02t0217900-00/Os02t0321800-01/Os03t0151800-02/Os03t0216600-01/Os03t0308000-01/Os03t0852200-01/Os04t0464500-01/Os04t0667800-01/Os05t0103100-01/Os06t0163500-01/Os06t0264300-01/Os06t0634600-01/Os07t0187700-01/Os07t0246200-01/Os09t0347700-01/Os09t0407200-01/Os12t0173366-01/Os12t0636000-01	21
dosa00480	dosa00480	Glutathione metabolism	10/709	112/4520	0.987937	0.999999	0.927088	Os01t0151500-00/Os01t0371200-01/Os01t0764000-01/Os01t0933900-01/Os04t0457500-01/Os04t0485300-01/Os05t0573200-00/Os06t0528600-01/Os07t0694700-01/Os10t0415300-01	10
dosa00908	dosa00908	Zeatin biosynthesis	1/709	29/4520	0.993021	0.999999	0.927088	Os01t0775400-01	1
dosa00600	dosa00600	Sphingolipid metabolism	1/709	30/4520	0.994122	0.999999	0.927088	Os01t0928800-01	1
dosa00592	dosa00592	alpha-Linolenic acid metabolism	2/709	49/4520	0.99772	0.999999	0.927088	Os01t0159400-01/Os05t0155000-01	2
dosa04120	dosa04120	Ubiquitin mediated proteolysis	8/709	112/4520	0.998098	0.999999	0.927088	Os01t0121900-00/Os01t0121950-00/Os01t0839700-01/Os01t0881900-01/Os03t0302700-01/Os03t0308000-01/Os04t0667800-01/Os11t0707700-01	8
dosa00970	dosa00970	Aminoacyl-tRNA biosynthesis	2/709	51/4520	0.998326	0.999999	0.927088	Os04t0398300-01/Os10t0463100-00	2
dosa03008	dosa03008	Ribosome biogenesis in eukaryotes	4/709	83/4520	0.999529	0.999999	0.927088	Os03t0207300-01/Os03t0647500-01/Os03t0735100-01/Os04t0576300-01	4
dosa00940	dosa00940	Phenylpropanoid biosynthesis	11/709	205/4520	0.999999	0.999999	0.927088	Os01t0283600-00/Os02t0180700-01/Os02t0611800-01/Os02t0741200-01/Os04t0688300-01/Os06t0237600-00/Os06t0681600-01/Os08t0245200-01/Os10t0512400-01/Os11t0210100-01/Os12t0420100-01	11

## Sheet: Magenta_GO
GO_acc	term_type	Term	queryitem	querytotal	bgitem	bgtotal	pvalue	FDR	entries
GO:0006810	P	transport	83	712	1638	24075	2.4e-06	0.00021	// LOC_Os03g37840 // LOC_Os07g34510 // LOC_Os03g03500 // LOC_Os03g22490 // LOC_Os07g39350 // LOC_Os02g49760 // LOC_Os03g25920 // LOC_Os11g05700 // LOC_Os05g01250 // LOC_Os08g01880 // LOC_Os08g37432 // LOC_Os08g31700 // LOC_Os05g35650 // LOC_Os12g32760 // LOC_Os12g44180 // LOC_Os03g54100 // LOC_Os01g42234 // LOC_Os07g47480 // LOC_Os01g11946 // LOC_Os06g13200 // LOC_Os12g02330 // LOC_Os11g38160 // …
GO:0051234	P	establishment of localization	83	712	1638	24075	2.4e-06	0.00021	// LOC_Os03g37840 // LOC_Os07g34510 // LOC_Os03g03500 // LOC_Os03g22490 // LOC_Os07g39350 // LOC_Os02g49760 // LOC_Os03g25920 // LOC_Os11g05700 // LOC_Os05g01250 // LOC_Os08g01880 // LOC_Os08g37432 // LOC_Os08g31700 // LOC_Os05g35650 // LOC_Os12g32760 // LOC_Os12g44180 // LOC_Os03g54100 // LOC_Os01g42234 // LOC_Os07g47480 // LOC_Os01g11946 // LOC_Os06g13200 // LOC_Os12g02330 // LOC_Os11g38160 // …
GO:0051179	P	localization	83	712	1651	24075	3.2e-06	0.00021	// LOC_Os03g37840 // LOC_Os07g34510 // LOC_Os03g03500 // LOC_Os03g22490 // LOC_Os07g39350 // LOC_Os02g49760 // LOC_Os03g25920 // LOC_Os11g05700 // LOC_Os05g01250 // LOC_Os08g01880 // LOC_Os08g37432 // LOC_Os08g31700 // LOC_Os05g35650 // LOC_Os12g32760 // LOC_Os12g44180 // LOC_Os03g54100 // LOC_Os01g42234 // LOC_Os07g47480 // LOC_Os01g11946 // LOC_Os06g13200 // LOC_Os12g02330 // LOC_Os11g38160 // …
GO:0005975	P	carbohydrate metabolic process	50	712	833	24075	4.5e-06	0.00022	// LOC_Os04g38530 // LOC_Os06g04080 // LOC_Os11g12810 // LOC_Os01g49320 // LOC_Os01g71340 // LOC_Os04g41620 // LOC_Os06g39970 // LOC_Os06g13040 // LOC_Os03g62860 // LOC_Os09g31430 // LOC_Os03g45390 // LOC_Os10g39680 // LOC_Os11g47600 // LOC_Os05g33150 // LOC_Os02g03870 // LOC_Os11g37960 // LOC_Os04g41640 // LOC_Os01g71670 // LOC_Os03g22790 // LOC_Os01g71830 // LOC_Os11g37940 // LOC_Os10g28120 // …
GO:0051704	P	multi-organism process	13	712	120	24075	0.00012	0.0049	// LOC_Os01g48040 // LOC_Os11g37950 // LOC_Os01g40499 // LOC_Os11g37940 // LOC_Os01g66610 // LOC_Os11g37970 // LOC_Os03g62180 // LOC_Os05g42210 // LOC_Os01g65030 // LOC_Os07g36570 // LOC_Os11g37960 // LOC_Os07g36770 // LOC_Os04g54002
GO:0009607	P	response to biotic stimulus	5	712	16	24075	0.00027	0.0088	// LOC_Os12g36880 // LOC_Os11g37940 // LOC_Os11g37950 // LOC_Os11g37960 // LOC_Os11g37970
GO:0010468	P	regulation of gene expression	68	712	1577	24075	0.0016	0.046	// LOC_Os06g09660 // LOC_Os08g37580 // LOC_Os02g16540 // LOC_Os01g50940 // LOC_Os01g38610 // LOC_Os01g06740 // LOC_Os04g41570 // LOC_Os06g35960 // LOC_Os12g37690 // LOC_Os03g29614 // LOC_Os01g62310 // LOC_Os09g20940 // LOC_Os07g48596 // LOC_Os05g14180 // LOC_Os02g09830 // LOC_Os11g06020 // LOC_Os03g21060 // LOC_Os07g49460 // LOC_Os05g47650 // LOC_Os03g19120 // LOC_Os05g37080 // LOC_Os02g01355 // …
GO:0000003	P	reproduction	11	712	133	24075	0.003	0.069	// LOC_Os01g48040 // LOC_Os05g15690 // LOC_Os01g40499 // LOC_Os04g46630 // LOC_Os01g66610 // LOC_Os03g62180 // LOC_Os05g42210 // LOC_Os01g65030 // LOC_Os07g36570 // LOC_Os07g36770 // LOC_Os04g54002
GO:0006629	P	lipid metabolic process	28	712	528	24075	0.0031	0.069	// LOC_Os10g07010 // LOC_Os05g49830 // LOC_Os05g43110 // LOC_Os05g49200 // LOC_Os01g61570 // LOC_Os01g11650 // LOC_Os03g14950 // LOC_Os06g24420 // LOC_Os01g42730 // LOC_Os01g67430 // LOC_Os01g20840 // LOC_Os05g49840 // LOC_Os06g39750 // LOC_Os03g59620 // LOC_Os02g49920 // LOC_Os10g33420 // LOC_Os12g01370 // LOC_Os01g73740 // LOC_Os04g56210 // LOC_Os09g25850 // LOC_Os06g46350 // LOC_Os04g21160 // …
GO:0019222	P	regulation of metabolic process	69	712	1664	24075	0.0037	0.072	// LOC_Os06g09660 // LOC_Os08g37580 // LOC_Os02g16540 // LOC_Os01g50940 // LOC_Os01g38610 // LOC_Os01g06740 // LOC_Os04g41570 // LOC_Os06g35960 // LOC_Os12g37690 // LOC_Os03g29614 // LOC_Os01g62310 // LOC_Os09g20940 // LOC_Os07g48596 // LOC_Os05g14180 // LOC_Os02g09830 // LOC_Os11g06020 // LOC_Os02g10860 // LOC_Os03g21060 // LOC_Os12g12260 // LOC_Os05g47650 // LOC_Os03g19120 // LOC_Os05g37080 // …
GO:0060255	P	regulation of macromolecule metabolic process	68	712	1640	24075	0.004	0.072	// LOC_Os06g09660 // LOC_Os08g37580 // LOC_Os02g16540 // LOC_Os01g50940 // LOC_Os01g38610 // LOC_Os01g06740 // LOC_Os04g41570 // LOC_Os06g35960 // LOC_Os12g37690 // LOC_Os03g29614 // LOC_Os01g62310 // LOC_Os09g20940 // LOC_Os07g48596 // LOC_Os05g14180 // LOC_Os02g09830 // LOC_Os11g06020 // LOC_Os03g21060 // LOC_Os07g49460 // LOC_Os05g47650 // LOC_Os03g19120 // LOC_Os05g37080 // LOC_Os02g01355 // …
GO:0006350	P	transcription	67	712	1629	24075	0.0051	0.084	// LOC_Os06g09660 // LOC_Os08g37580 // LOC_Os02g16540 // LOC_Os01g50940 // LOC_Os01g38610 // LOC_Os04g41570 // LOC_Os06g35960 // LOC_Os12g37690 // LOC_Os03g29614 // LOC_Os01g62310 // LOC_Os09g20940 // LOC_Os07g48596 // LOC_Os05g14180 // LOC_Os02g09830 // LOC_Os11g06020 // LOC_Os03g21060 // LOC_Os07g49460 // LOC_Os05g47650 // LOC_Os03g19120 // LOC_Os05g37080 // LOC_Os02g01355 // LOC_Os01g60020 // …
GO:0006464	P	protein modification process	77	712	1929	24075	0.0056	0.085	// LOC_Os04g52640 // LOC_Os03g58750 // LOC_Os04g30040 // LOC_Os01g62080 // LOC_Os07g09610 // LOC_Os07g35370 // LOC_Os03g51030 // LOC_Os04g12580 // LOC_Os07g35540 // LOC_Os03g62180 // LOC_Os12g39120 // LOC_Os09g29540 // LOC_Os02g19530 // LOC_Os01g60700 // LOC_Os05g42210 // LOC_Os07g03780 // LOC_Os07g48290 // LOC_Os05g35266 // LOC_Os04g04330 // LOC_Os07g36570 // LOC_Os01g26390 // LOC_Os12g02250 // …
GO:0009856	P	pollination	9	712	114	24075	0.0092	0.11	// LOC_Os01g48040 // LOC_Os03g62180 // LOC_Os01g40499 // LOC_Os01g66610 // LOC_Os05g42210 // LOC_Os01g65030 // LOC_Os07g36570 // LOC_Os07g36770 // LOC_Os04g54002
GO:0022414	P	reproductive process	9	712	114	24075	0.0092	0.11	// LOC_Os01g48040 // LOC_Os03g62180 // LOC_Os01g40499 // LOC_Os01g66610 // LOC_Os05g42210 // LOC_Os01g65030 // LOC_Os07g36570 // LOC_Os07g36770 // LOC_Os04g54002
GO:0009875	P	pollen-pistil interaction	9	712	114	24075	0.0092	0.11	// LOC_Os01g48040 // LOC_Os03g62180 // LOC_Os01g40499 // LOC_Os01g66610 // LOC_Os05g42210 // LOC_Os01g65030 // LOC_Os07g36570 // LOC_Os07g36770 // LOC_Os04g54002
GO:0043412	P	macromolecule modification	77	712	1979	24075	0.0099	0.12	// LOC_Os04g52640 // LOC_Os03g58750 // LOC_Os04g30040 // LOC_Os01g62080 // LOC_Os07g09610 // LOC_Os07g35370 // LOC_Os03g51030 // LOC_Os04g12580 // LOC_Os07g35540 // LOC_Os03g62180 // LOC_Os12g39120 // LOC_Os09g29540 // LOC_Os02g19530 // LOC_Os01g60700 // LOC_Os05g42210 // LOC_Os07g03780 // LOC_Os07g48290 // LOC_Os05g35266 // LOC_Os04g04330 // LOC_Os07g36570 // LOC_Os01g26390 // LOC_Os12g02250 // …
GO:0050896	P	response to stimulus	44	712	1026	24075	0.011	0.12	// LOC_Os06g09660 // LOC_Os09g29490 // LOC_Os03g27280 // LOC_Os04g59210 // LOC_Os01g16450 // LOC_Os04g02030 // LOC_Os03g22390 // LOC_Os12g36880 // LOC_Os03g55410 // LOC_Os01g21250 // LOC_Os11g37940 // LOC_Os01g73170 // LOC_Os06g13070 // LOC_Os03g62340 // LOC_Os11g37960 // LOC_Os07g36230 // LOC_Os06g48020 // LOC_Os07g02440 // LOC_Os08g05440 // LOC_Os11g32210 // LOC_Os03g24380 // LOC_Os04g55740 // …
GO:0032501	P	multicellular organismal process	10	712	154	24075	0.02	0.21	// LOC_Os01g48040 // LOC_Os03g62180 // LOC_Os01g40499 // LOC_Os01g66610 // LOC_Os03g51030 // LOC_Os05g42210 // LOC_Os01g65030 // LOC_Os07g36570 // LOC_Os07g36770 // LOC_Os04g54002
GO:0009628	P	response to abiotic stimulus	6	712	74	24075	0.028	0.27	// LOC_Os07g39530 // LOC_Os03g51030 // LOC_Os12g02530 // LOC_Os03g22600 // LOC_Os07g36230 // LOC_Os03g27280
GO:0065007	P	biological regulation	78	712	2125	24075	0.031	0.3	// LOC_Os06g09660 // LOC_Os08g37580 // LOC_Os02g16540 // LOC_Os01g50940 // LOC_Os01g38610 // LOC_Os02g44590 // LOC_Os01g06740 // LOC_Os04g41570 // LOC_Os06g35960 // LOC_Os12g37690 // LOC_Os03g29614 // LOC_Os01g62310 // LOC_Os09g20940 // LOC_Os07g48596 // LOC_Os05g14180 // LOC_Os02g09830 // LOC_Os11g06020 // LOC_Os02g10860 // LOC_Os03g21060 // LOC_Os12g12260 // LOC_Os01g58280 // LOC_Os05g47650 // …
GO:0050794	P	regulation of cellular process	72	712	1955	24075	0.036	0.32	// LOC_Os06g09660 // LOC_Os08g37580 // LOC_Os02g16540 // LOC_Os01g50940 // LOC_Os01g38610 // LOC_Os01g06740 // LOC_Os04g41570 // LOC_Os06g35960 // LOC_Os12g37690 // LOC_Os03g29614 // LOC_Os01g62310 // LOC_Os09g20940 // LOC_Os07g48596 // LOC_Os05g14180 // LOC_Os02g09830 // LOC_Os11g06020 // LOC_Os02g10860 // LOC_Os03g21060 // LOC_Os12g12260 // LOC_Os05g47650 // LOC_Os03g19120 // LOC_Os05g37080 // …
GO:0050789	P	regulation of biological process	72	712	2027	24075	0.066	0.56	// LOC_Os06g09660 // LOC_Os08g37580 // LOC_Os02g16540 // LOC_Os01g50940 // LOC_Os01g38610 // LOC_Os01g06740 // LOC_Os04g41570 // LOC_Os06g35960 // LOC_Os12g37690 // LOC_Os03g29614 // LOC_Os01g62310 // LOC_Os09g20940 // LOC_Os07g48596 // LOC_Os05g14180 // LOC_Os02g09830 // LOC_Os11g06020 // LOC_Os02g10860 // LOC_Os03g21060 // LOC_Os12g12260 // LOC_Os05g47650 // LOC_Os03g19120 // LOC_Os05g37080 // …
GO:0007154	P	cell communication	9	712	170	24075	0.074	0.61	// LOC_Os01g48040 // LOC_Os03g62180 // LOC_Os01g40499 // LOC_Os01g66610 // LOC_Os05g42210 // LOC_Os01g65030 // LOC_Os07g36570 // LOC_Os07g36770 // LOC_Os04g54002
GO:0006519	P	cellular amino acid and derivative metabolic process	17	712	391	24075	0.082	0.65	// LOC_Os03g15780 // LOC_Os03g10050 // LOC_Os10g37340 // LOC_Os08g04540 // LOC_Os04g01690 // LOC_Os02g19924 // LOC_Os12g16200 // LOC_Os10g40360 // LOC_Os02g39570 // LOC_Os09g25620 // LOC_Os03g60090 // LOC_Os09g25390 // LOC_Os09g25625 // LOC_Os03g51080 // LOC_Os06g42560 // LOC_Os11g35040 // LOC_Os08g04560
GO:0009056	P	catabolic process	18	712	433	24075	0.1	0.77	// LOC_Os11g37940 // LOC_Os11g37950 // LOC_Os11g37960 // LOC_Os04g01690 // LOC_Os10g33420 // LOC_Os10g40360 // LOC_Os04g41620 // LOC_Os01g20840 // LOC_Os05g33130 // LOC_Os04g55850 // LOC_Os01g60190 // LOC_Os04g41680 // LOC_Os05g33150 // LOC_Os03g22790 // LOC_Os11g37970 // LOC_Os04g41640 // LOC_Os03g02685 // LOC_Os10g39680
GO:0044238	P	primary metabolic process	274	712	11969	24075	1	1	// LOC_Os07g34510 // LOC_Os04g38530 // LOC_Os03g28300 // LOC_Os04g46940 // LOC_Os01g38359 // LOC_Os02g19924 // LOC_Os01g43100 // LOC_Os01g61570 // LOC_Os01g11650 // LOC_Os10g39260 // LOC_Os02g19530 // LOC_Os07g36570 // LOC_Os05g42210 // LOC_Os02g39570 // LOC_Os05g43110 // LOC_Os07g48596 // LOC_Os05g14180 // LOC_Os02g51670 // LOC_Os07g48290 // LOC_Os10g28120 // LOC_Os03g12840 // LOC_Os01g26390 // …
GO:0044249	P	cellular biosynthetic process	98	712	5890	24075	1	1	// LOC_Os07g34510 // LOC_Os04g46940 // LOC_Os07g48596 // LOC_Os05g14180 // LOC_Os11g02540 // LOC_Os03g19120 // LOC_Os05g35266 // LOC_Os03g44540 // LOC_Os01g66890 // LOC_Os12g16200 // LOC_Os02g02820 // LOC_Os08g19650 // LOC_Os06g39970 // LOC_Os06g48720 // LOC_Os07g08460 // LOC_Os05g27930 // LOC_Os01g14630 // LOC_Os02g36340 // LOC_Os07g09190 // LOC_Os11g03440 // LOC_Os12g34056 // LOC_Os01g64000 // …
GO:0006807	P	nitrogen compound metabolic process	110	712	7073	24075	1	1	// LOC_Os07g34510 // LOC_Os04g46940 // LOC_Os07g48596 // LOC_Os05g14180 // LOC_Os05g47650 // LOC_Os04g09810 // LOC_Os03g19120 // LOC_Os05g37080 // LOC_Os03g44540 // LOC_Os01g66890 // LOC_Os06g13070 // LOC_Os02g02820 // LOC_Os08g19650 // LOC_Os10g33270 // LOC_Os01g09930 // LOC_Os06g48720 // LOC_Os07g08460 // LOC_Os05g27930 // LOC_Os08g39630 // LOC_Os02g36340 // LOC_Os11g03440 // LOC_Os09g25390 // …
GO:0034645	P	cellular macromolecule biosynthetic process	77	712	5248	24075	1	1	// LOC_Os06g09660 // LOC_Os07g34510 // LOC_Os08g37580 // LOC_Os02g16540 // LOC_Os01g50940 // LOC_Os01g38610 // LOC_Os01g06740 // LOC_Os05g06610 // LOC_Os04g41570 // LOC_Os06g35960 // LOC_Os12g37690 // LOC_Os03g29614 // LOC_Os01g62310 // LOC_Os09g20940 // LOC_Os07g48596 // LOC_Os05g14180 // LOC_Os02g09830 // LOC_Os11g06020 // LOC_Os05g35266 // LOC_Os06g43860 // LOC_Os03g21060 // LOC_Os07g49460 // …
GO:0008219	P	cell death	9	712	544	24075	0.98	1	// LOC_Os08g05440 // LOC_Os11g39260 // LOC_Os08g07340 // LOC_Os02g10350 // LOC_Os11g32170 // LOC_Os11g12050 // LOC_Os04g02030 // LOC_Os01g66510 // LOC_Os11g32210
GO:0044267	P	cellular protein metabolic process	82	712	2877	24075	0.65	1	// LOC_Os04g52640 // LOC_Os03g58750 // LOC_Os04g30040 // LOC_Os01g62080 // LOC_Os07g09610 // LOC_Os07g35370 // LOC_Os01g38359 // LOC_Os03g51030 // LOC_Os04g12580 // LOC_Os08g06460 // LOC_Os03g62180 // LOC_Os12g39120 // LOC_Os09g29540 // LOC_Os02g19530 // LOC_Os01g60700 // LOC_Os05g42210 // LOC_Os07g03780 // LOC_Os07g48290 // LOC_Os05g35266 // LOC_Os04g04330 // LOC_Os07g36570 // LOC_Os01g26390 // …
GO:0044260	P	cellular macromolecule metabolic process	166	712	9350	24075	1	1	// LOC_Os07g34510 // LOC_Os07g09610 // LOC_Os01g41960 // LOC_Os09g29540 // LOC_Os02g19530 // LOC_Os05g42210 // LOC_Os07g48596 // LOC_Os05g14180 // LOC_Os07g35390 // LOC_Os07g48290 // LOC_Os01g26390 // LOC_Os12g02250 // LOC_Os11g02540 // LOC_Os03g19120 // LOC_Os12g40419 // LOC_Os03g44540 // LOC_Os07g38250 // LOC_Os03g27280 // LOC_Os05g35266 // LOC_Os01g66890 // LOC_Os06g13070 // LOC_Os04g55850 // …
GO:0010467	P	gene expression	71	712	2424	24075	0.55	1	// LOC_Os06g09660 // LOC_Os08g37580 // LOC_Os02g16540 // LOC_Os01g50940 // LOC_Os01g38610 // LOC_Os01g06740 // LOC_Os04g41570 // LOC_Os06g35960 // LOC_Os12g37690 // LOC_Os03g29614 // LOC_Os01g62310 // LOC_Os09g20940 // LOC_Os07g48596 // LOC_Os05g14180 // LOC_Os02g09830 // LOC_Os11g06020 // LOC_Os06g43860 // LOC_Os03g21060 // LOC_Os07g49460 // LOC_Os05g47650 // LOC_Os03g19120 // LOC_Os05g37080 // …
GO:0016265	P	death	9	712	544	24075	0.98	1	// LOC_Os08g05440 // LOC_Os11g39260 // LOC_Os08g07340 // LOC_Os02g10350 // LOC_Os11g32170 // LOC_Os11g12050 // LOC_Os04g02030 // LOC_Os01g66510 // LOC_Os11g32210
GO:0006139	P	nucleobase, nucleoside, nucleotide and nucleic acid metabolic process	81	712	6695	24075	1	1	// LOC_Os06g09660 // LOC_Os07g34510 // LOC_Os08g37580 // LOC_Os04g46940 // LOC_Os02g16540 // LOC_Os01g50940 // LOC_Os01g38610 // LOC_Os05g06610 // LOC_Os04g41570 // LOC_Os05g18850 // LOC_Os06g35960 // LOC_Os12g37690 // LOC_Os03g29614 // LOC_Os01g62310 // LOC_Os09g20940 // LOC_Os05g14180 // LOC_Os02g44136 // LOC_Os02g16080 // LOC_Os01g18870 // LOC_Os11g06020 // LOC_Os01g50110 // LOC_Os03g21060 // …
GO:0009058	P	biosynthetic process	102	712	6085	24075	1	1	// LOC_Os07g34510 // LOC_Os04g46940 // LOC_Os07g48596 // LOC_Os05g14180 // LOC_Os11g02540 // LOC_Os03g19120 // LOC_Os05g35266 // LOC_Os03g44540 // LOC_Os01g66890 // LOC_Os12g16200 // LOC_Os02g02820 // LOC_Os08g19650 // LOC_Os06g39970 // LOC_Os06g48720 // LOC_Os07g08460 // LOC_Os05g27930 // LOC_Os01g14630 // LOC_Os02g36340 // LOC_Os07g09190 // LOC_Os11g03440 // LOC_Os12g34056 // LOC_Os01g64000 // …
GO:0006950	P	response to stress	31	712	873	24075	0.18	1	// LOC_Os09g29490 // LOC_Os04g59210 // LOC_Os01g16450 // LOC_Os04g02030 // LOC_Os03g22390 // LOC_Os12g36880 // LOC_Os03g55410 // LOC_Os01g73170 // LOC_Os11g37940 // LOC_Os11g37960 // LOC_Os03g62340 // LOC_Os06g48020 // LOC_Os07g02440 // LOC_Os03g27280 // LOC_Os03g24380 // LOC_Os04g55740 // LOC_Os08g07340 // LOC_Os06g13070 // LOC_Os02g14180 // LOC_Os01g10850 // LOC_Os12g25090 // LOC_Os11g32170 // …
GO:0009059	P	macromolecule biosynthetic process	77	712	5252	24075	1	1	// LOC_Os06g09660 // LOC_Os07g34510 // LOC_Os08g37580 // LOC_Os02g16540 // LOC_Os01g50940 // LOC_Os01g38610 // LOC_Os01g06740 // LOC_Os05g06610 // LOC_Os04g41570 // LOC_Os06g35960 // LOC_Os12g37690 // LOC_Os03g29614 // LOC_Os01g62310 // LOC_Os09g20940 // LOC_Os07g48596 // LOC_Os05g14180 // LOC_Os02g09830 // LOC_Os11g06020 // LOC_Os05g35266 // LOC_Os06g43860 // LOC_Os03g21060 // LOC_Os07g49460 // …
GO:0008152	P	metabolic process	439	712	14398	24075	0.17	1	// LOC_Os04g46940 // LOC_Os01g61570 // LOC_Os05g43110 // LOC_Os05g14180 // LOC_Os07g48290 // LOC_Os03g59152 // LOC_Os10g40830 // LOC_Os12g40419 // LOC_Os02g34990 // LOC_Os03g25490 // LOC_Os02g38290 // LOC_Os12g12260 // LOC_Os06g13070 // LOC_Os07g03870 // LOC_Os04g52780 // LOC_Os01g60190 // LOC_Os01g41550 // LOC_Os01g43100 // LOC_Os07g41060 // LOC_Os05g27930 // LOC_Os08g39630 // LOC_Os01g02400 // …
GO:0019538	P	protein metabolic process	103	712	4333	24075	0.99	1	// LOC_Os09g29540 // LOC_Os10g39260 // LOC_Os02g19530 // LOC_Os05g42210 // LOC_Os07g48290 // LOC_Os01g26390 // LOC_Os12g02250 // LOC_Os09g29560 // LOC_Os10g40830 // LOC_Os05g35266 // LOC_Os07g38250 // LOC_Os03g27280 // LOC_Os05g25390 // LOC_Os11g11780 // LOC_Os07g09610 // LOC_Os04g52780 // LOC_Os07g48730 // LOC_Os08g27780 // LOC_Os01g41550 // LOC_Os01g43100 // LOC_Os09g16980 // LOC_Os03g28300 // …
GO:0044237	P	cellular metabolic process	219	712	10696	24075	1	1	// LOC_Os07g34510 // LOC_Os03g28300 // LOC_Os04g46940 // LOC_Os12g03530 // LOC_Os02g19924 // LOC_Os12g07810 // LOC_Os01g41960 // LOC_Os09g29540 // LOC_Os02g19530 // LOC_Os05g42210 // LOC_Os07g48596 // LOC_Os05g14180 // LOC_Os02g51670 // LOC_Os07g48290 // LOC_Os03g12840 // LOC_Os01g26390 // LOC_Os12g02250 // LOC_Os01g59550 // LOC_Os08g34380 // LOC_Os03g19120 // LOC_Os12g40419 // LOC_Os03g44540 // …
GO:0043170	P	macromolecule metabolic process	198	712	10433	24075	1	1	// LOC_Os07g34510 // LOC_Os09g29540 // LOC_Os01g41960 // LOC_Os10g39260 // LOC_Os02g19530 // LOC_Os05g42210 // LOC_Os07g48596 // LOC_Os05g14180 // LOC_Os02g51670 // LOC_Os07g48290 // LOC_Os01g26390 // LOC_Os12g02250 // LOC_Os04g55850 // LOC_Os11g37970 // LOC_Os10g40830 // LOC_Os12g40419 // LOC_Os03g44540 // LOC_Os07g38250 // LOC_Os03g27280 // LOC_Os01g41550 // LOC_Os01g66890 // LOC_Os06g13070 // …
GO:0006259	P	DNA metabolic process	10	712	4515	24075	1	1	// LOC_Os07g34510 // LOC_Os06g13070 // LOC_Os01g41960 // LOC_Os05g06610 // LOC_Os04g55850 // LOC_Os10g27260 // LOC_Os02g44136 // LOC_Os02g16080 // LOC_Os07g40610 // LOC_Os07g10850
GO:0009987	P	cellular process	271	712	12839	24075	1	1	// LOC_Os07g34510 // LOC_Os03g28300 // LOC_Os04g46940 // LOC_Os12g03530 // LOC_Os02g19924 // LOC_Os12g07810 // LOC_Os11g05700 // LOC_Os09g29540 // LOC_Os02g19530 // LOC_Os12g06060 // LOC_Os05g42210 // LOC_Os04g02030 // LOC_Os07g48596 // LOC_Os05g14180 // LOC_Os02g51670 // LOC_Os07g48290 // LOC_Os01g11946 // LOC_Os08g07340 // LOC_Os01g26390 // LOC_Os12g02250 // LOC_Os03g62200 // LOC_Os08g34380 // …
GO:0003824	F	catalytic activity	436	712	12724	24075	5.3e-06	0.0003	// LOC_Os04g46940 // LOC_Os01g61570 // LOC_Os06g28124 // LOC_Os05g43110 // LOC_Os07g48290 // LOC_Os03g59152 // LOC_Os11g37700 // LOC_Os10g40934 // LOC_Os10g40830 // LOC_Os12g40419 // LOC_Os03g25490 // LOC_Os02g38290 // LOC_Os04g37660 // LOC_Os12g12260 // LOC_Os10g33420 // LOC_Os12g24320 // LOC_Os07g03870 // LOC_Os04g52780 // LOC_Os01g60190 // LOC_Os09g38239 // LOC_Os01g41550 // LOC_Os01g43100 // …
GO:0005215	F	transporter activity	54	712	941	24075	6.4e-06	0.0003	// LOC_Os03g37840 // LOC_Os08g44870 // LOC_Os07g39350 // LOC_Os02g49760 // LOC_Os11g05700 // LOC_Os08g37432 // LOC_Os05g35650 // LOC_Os12g32760 // LOC_Os03g54100 // LOC_Os01g42234 // LOC_Os01g11946 // LOC_Os11g38160 // LOC_Os03g11734 // LOC_Os03g04920 // LOC_Os11g17970 // LOC_Os05g35594 // LOC_Os03g62200 // LOC_Os04g38026 // LOC_Os06g42030 // LOC_Os06g46670 // LOC_Os03g05610 // LOC_Os01g13120 // …
GO:0030246	F	carbohydrate binding	16	712	219	24075	0.0013	0.032	// LOC_Os01g48040 // LOC_Os03g62180 // LOC_Os01g40499 // LOC_Os08g44020 // LOC_Os04g41680 // LOC_Os01g66610 // LOC_Os04g12580 // LOC_Os04g38530 // LOC_Os05g42210 // LOC_Os01g65030 // LOC_Os05g33150 // LOC_Os07g36570 // LOC_Os04g54002 // LOC_Os07g36770 // LOC_Os04g41640 // LOC_Os05g33130
GO:0016301	F	kinase activity	75	712	1750	24075	0.0011	0.032	// LOC_Os04g52640 // LOC_Os03g58750 // LOC_Os04g30040 // LOC_Os01g62080 // LOC_Os07g09610 // LOC_Os07g35370 // LOC_Os03g51030 // LOC_Os04g12580 // LOC_Os07g35540 // LOC_Os03g62180 // LOC_Os09g29540 // LOC_Os02g19530 // LOC_Os01g60700 // LOC_Os05g42210 // LOC_Os04g21110 // LOC_Os07g03780 // LOC_Os07g48290 // LOC_Os04g54002 // LOC_Os07g35380 // LOC_Os04g04330 // LOC_Os03g12840 // LOC_Os01g26390 // …
GO:0003676	F	nucleic acid binding	66	712	8251	24075	1	1	// LOC_Os06g09660 // LOC_Os07g34510 // LOC_Os09g36700 // LOC_Os02g16540 // LOC_Os08g29650 // LOC_Os05g06610 // LOC_Os06g35960 // LOC_Os12g37690 // LOC_Os03g29614 // LOC_Os01g62310 // LOC_Os07g48596 // LOC_Os01g09280 // LOC_Os02g16080 // LOC_Os02g09830 // LOC_Os06g22030 // LOC_Os08g33710 // LOC_Os07g43670 // LOC_Os03g21060 // LOC_Os05g47650 // LOC_Os04g55850 // LOC_Os03g19120 // LOC_Os05g37080 // …
GO:0016817	F	hydrolase activity, acting on acid anhydrides	20	712	764	24075	0.74	1	// LOC_Os02g33850 // LOC_Os09g16458 // LOC_Os11g37700 // LOC_Os02g09720 // LOC_Os01g14090 // LOC_Os07g08970 // LOC_Os09g16449 // LOC_Os01g11946 // LOC_Os12g24320 // LOC_Os04g46940 // LOC_Os03g04920 // LOC_Os11g05700 // LOC_Os07g18874 // LOC_Os05g31910 // LOC_Os08g43120 // LOC_Os09g35860 // LOC_Os02g21340 // LOC_Os06g48720 // LOC_Os01g42900 // LOC_Os01g50160
GO:0004871	F	signal transducer activity	8	712	152	24075	0.091	1	// LOC_Os07g39530 // LOC_Os07g49460 // LOC_Os03g51030 // LOC_Os12g02530 // LOC_Os03g22600 // LOC_Os02g35180 // LOC_Os07g36230 // LOC_Os06g46670
GO:0005488	F	binding	414	712	16823	24075	1	1	// LOC_Os03g03500 // LOC_Os04g46940 // LOC_Os01g09280 // LOC_Os05g14180 // LOC_Os07g48290 // LOC_Os11g37700 // LOC_Os10g40830 // LOC_Os12g40419 // LOC_Os02g34990 // LOC_Os03g25490 // LOC_Os02g38290 // LOC_Os12g38300 // LOC_Os12g24320 // LOC_Os07g03870 // LOC_Os04g52780 // LOC_Os09g16650 // LOC_Os06g46270 // LOC_Os01g60190 // LOC_Os04g33240 // LOC_Os07g41060 // LOC_Os05g27930 // LOC_Os09g16980 // …
GO:0003677	F	DNA binding	53	712	5059	24075	1	1	// LOC_Os06g09660 // LOC_Os07g34510 // LOC_Os02g16540 // LOC_Os05g06610 // LOC_Os06g35960 // LOC_Os12g37690 // LOC_Os03g29614 // LOC_Os01g62310 // LOC_Os07g48596 // LOC_Os01g09280 // LOC_Os02g16080 // LOC_Os02g09830 // LOC_Os06g22030 // LOC_Os03g21060 // LOC_Os05g47650 // LOC_Os03g19120 // LOC_Os05g37080 // LOC_Os02g01355 // LOC_Os01g60020 // LOC_Os02g51670 // LOC_Os11g02540 // LOC_Os01g02100 // …
GO:0017111	F	nucleoside-triphosphatase activity	20	712	726	24075	0.66	1	// LOC_Os02g33850 // LOC_Os09g16458 // LOC_Os11g37700 // LOC_Os02g09720 // LOC_Os01g14090 // LOC_Os07g08970 // LOC_Os09g16449 // LOC_Os01g11946 // LOC_Os12g24320 // LOC_Os04g46940 // LOC_Os03g04920 // LOC_Os11g05700 // LOC_Os07g18874 // LOC_Os05g31910 // LOC_Os08g43120 // LOC_Os09g35860 // LOC_Os02g21340 // LOC_Os06g48720 // LOC_Os01g42900 // LOC_Os01g50160
GO:0016462	F	pyrophosphatase activity	20	712	743	24075	0.69	1	// LOC_Os02g33850 // LOC_Os09g16458 // LOC_Os11g37700 // LOC_Os02g09720 // LOC_Os01g14090 // LOC_Os07g08970 // LOC_Os09g16449 // LOC_Os01g11946 // LOC_Os12g24320 // LOC_Os04g46940 // LOC_Os03g04920 // LOC_Os11g05700 // LOC_Os07g18874 // LOC_Os05g31910 // LOC_Os08g43120 // LOC_Os09g35860 // LOC_Os02g21340 // LOC_Os06g48720 // LOC_Os01g42900 // LOC_Os01g50160
GO:0016740	F	transferase activity	152	712	6190	24075	1	1	// LOC_Os07g34510 // LOC_Os02g19924 // LOC_Os01g41960 // LOC_Os06g28124 // LOC_Os02g19530 // LOC_Os05g42210 // LOC_Os07g48290 // LOC_Os03g12840 // LOC_Os01g26390 // LOC_Os12g02250 // LOC_Os09g29560 // LOC_Os08g34380 // LOC_Os12g40419 // LOC_Os02g02210 // LOC_Os07g13810 // LOC_Os04g12580 // LOC_Os03g27280 // LOC_Os01g66890 // LOC_Os12g12260 // LOC_Os11g11780 // LOC_Os07g09610 // LOC_Os04g52780 // …
GO:0030528	F	transcription regulator activity	38	712	987	24075	0.066	1	// LOC_Os08g37580 // LOC_Os02g16540 // LOC_Os01g50940 // LOC_Os01g38610 // LOC_Os04g41570 // LOC_Os06g35960 // LOC_Os01g62310 // LOC_Os09g20940 // LOC_Os02g10860 // LOC_Os02g09830 // LOC_Os11g06020 // LOC_Os11g02540 // LOC_Os09g32510 // LOC_Os02g01355 // LOC_Os02g51670 // LOC_Os05g47650 // LOC_Os09g10840 // LOC_Os03g44540 // LOC_Os01g66890 // LOC_Os07g49460 // LOC_Os01g12440 // LOC_Os08g19650 // …
GO:0000166	F	nucleotide binding	122	712	3874	24075	0.24	1	// LOC_Os04g46940 // LOC_Os11g05700 // LOC_Os09g29540 // LOC_Os02g19530 // LOC_Os05g42210 // LOC_Os04g02030 // LOC_Os04g29210 // LOC_Os07g18874 // LOC_Os07g48290 // LOC_Os11g37700 // LOC_Os03g12840 // LOC_Os01g26390 // LOC_Os12g02250 // LOC_Os09g29560 // LOC_Os12g40419 // LOC_Os03g04920 // LOC_Os02g01480 // LOC_Os07g38250 // LOC_Os03g27280 // LOC_Os11g11780 // LOC_Os12g16200 // LOC_Os07g09610 // …
GO:0003700	F	transcription factor activity	20	712	651	24075	0.47	1	// LOC_Os05g47650 // LOC_Os01g64000 // LOC_Os06g35960 // LOC_Os02g16540 // LOC_Os06g43860 // LOC_Os05g27930 // LOC_Os08g37580 // LOC_Os02g01355 // LOC_Os01g12440 // LOC_Os02g51670 // LOC_Os11g02540 // LOC_Os09g10840 // LOC_Os01g62310 // LOC_Os03g44540 // LOC_Os11g06020 // LOC_Os02g10860 // LOC_Os02g09830 // LOC_Os08g19650 // LOC_Os03g08490 // LOC_Os12g02470
GO:0060089	F	molecular transducer activity	8	712	152	24075	0.091	1	// LOC_Os07g39530 // LOC_Os07g49460 // LOC_Os03g51030 // LOC_Os12g02530 // LOC_Os03g22600 // LOC_Os02g35180 // LOC_Os07g36230 // LOC_Os06g46670
GO:0016787	F	hydrolase activity	132	712	4901	24075	0.89	1	// LOC_Os04g46940 // LOC_Os01g61570 // LOC_Os01g11650 // LOC_Os10g39260 // LOC_Os02g33850 // LOC_Os05g43110 // LOC_Os02g21340 // LOC_Os07g18874 // LOC_Os07g43670 // LOC_Os10g28120 // LOC_Os11g37700 // LOC_Os11g37970 // LOC_Os10g40830 // LOC_Os03g04920 // LOC_Os11g08870 // LOC_Os07g45170 // LOC_Os08g40740 // LOC_Os12g24320 // LOC_Os03g15270 // LOC_Os11g05700 // LOC_Os09g28650 // LOC_Os06g48720 // …
GO:0030234	F	enzyme regulator activity	8	712	255	24075	0.48	1	// LOC_Os11g07090 // LOC_Os02g52480 // LOC_Os01g03390 // LOC_Os12g25090 // LOC_Os01g03330 // LOC_Os03g52390 // LOC_Os02g01300 // LOC_Os08g34900
GO:0008289	F	lipid binding	5	712	85	24075	0.12	1	// LOC_Os11g02400 // LOC_Os12g02340 // LOC_Os12g02330 // LOC_Os11g02424 // LOC_Os03g58940
GO:0016788	F	hydrolase activity, acting on ester bonds	30	712	1949	24075	1	1	// LOC_Os05g49830 // LOC_Os11g07090 // LOC_Os01g42730 // LOC_Os01g73740 // LOC_Os12g39120 // LOC_Os05g45900 // LOC_Os05g43110 // LOC_Os01g51890 // LOC_Os08g33710 // LOC_Os07g43670 // LOC_Os05g18850 // LOC_Os01g20840 // LOC_Os04g55850 // LOC_Os11g08870 // LOC_Os06g24420 // LOC_Os08g34900 // LOC_Os07g45170 // LOC_Os12g05540 // LOC_Os01g61570 // LOC_Os09g36700 // LOC_Os01g11650 // LOC_Os01g43100 // …
GO:0004518	F	nuclease activity	6	712	1337	24075	1	1	// LOC_Os07g43670 // LOC_Os05g18850 // LOC_Os09g36700 // LOC_Os04g55850 // LOC_Os07g40610 // LOC_Os08g33710
GO:0016818	F	hydrolase activity, acting on acid anhydrides, in phosphorus-containing anhydrides	20	712	759	24075	0.73	1	// LOC_Os02g33850 // LOC_Os09g16458 // LOC_Os11g37700 // LOC_Os02g09720 // LOC_Os01g14090 // LOC_Os07g08970 // LOC_Os09g16449 // LOC_Os01g11946 // LOC_Os12g24320 // LOC_Os04g46940 // LOC_Os03g04920 // LOC_Os11g05700 // LOC_Os07g18874 // LOC_Os05g31910 // LOC_Os08g43120 // LOC_Os09g35860 // LOC_Os02g21340 // LOC_Os06g48720 // LOC_Os01g42900 // LOC_Os01g50160
GO:0005515	F	protein binding	64	712	2460	24075	0.87	1	// LOC_Os02g57460 // LOC_Os04g52640 // LOC_Os03g58390 // LOC_Os06g09660 // LOC_Os02g09830 // LOC_Os04g01470 // LOC_Os02g58170 // LOC_Os02g44590 // LOC_Os07g34510 // LOC_Os01g41960 // LOC_Os01g49920 // LOC_Os06g34400 // LOC_Os05g14180 // LOC_Os01g08820 // LOC_Os01g33110 // LOC_Os02g10860 // LOC_Os04g04330 // LOC_Os05g36290 // LOC_Os01g58280 // LOC_Os05g08570 // LOC_Os07g47590 // LOC_Os06g09310 // …
GO:0016772	F	transferase activity, transferring phosphorus-containing groups	80	712	4781	24075	1	1	// LOC_Os04g52640 // LOC_Os07g34510 // LOC_Os04g30040 // LOC_Os01g62080 // LOC_Os07g09610 // LOC_Os07g35370 // LOC_Os03g51030 // LOC_Os04g12580 // LOC_Os07g35540 // LOC_Os03g58750 // LOC_Os05g06610 // LOC_Os09g29540 // LOC_Os02g19530 // LOC_Os01g60700 // LOC_Os05g42210 // LOC_Os04g21110 // LOC_Os07g03780 // LOC_Os07g48290 // LOC_Os04g54002 // LOC_Os07g35380 // LOC_Os04g04330 // LOC_Os03g12840 // …
GO:0003723	F	RNA binding	10	712	3190	24075	1	1	// LOC_Os07g43670 // LOC_Os07g34510 // LOC_Os05g18850 // LOC_Os01g41960 // LOC_Os05g06610 // LOC_Os09g36700 // LOC_Os10g27260 // LOC_Os12g34056 // LOC_Os07g40610 // LOC_Os08g33710
GO:0016020	C	membrane	108	712	2115	24075	3.9e-08	2.5e-06	// LOC_Os07g34510 // LOC_Os04g46940 // LOC_Os11g05700 // LOC_Os12g06060 // LOC_Os04g29210 // LOC_Os07g18874 // LOC_Os11g37700 // LOC_Os05g35266 // LOC_Os03g04920 // LOC_Os05g35594 // LOC_Os08g43120 // LOC_Os10g14920 // LOC_Os03g05610 // LOC_Os12g44110 // LOC_Os05g49270 // LOC_Os07g34110 // LOC_Os10g33420 // LOC_Os08g43250 // LOC_Os06g39970 // LOC_Os06g48720 // LOC_Os03g30200 // LOC_Os01g36070 // …
GO:0005576	C	extracellular region	20	712	251	24075	0.00012	0.0038	// LOC_Os04g46630 // LOC_Os05g15690 // LOC_Os01g03330 // LOC_Os07g03710 // LOC_Os01g03390 // LOC_Os07g34580 // LOC_Os10g40830 // LOC_Os08g35750 // LOC_Os06g13040 // LOC_Os08g09000 // LOC_Os08g09010 // LOC_Os10g11500 // LOC_Os04g15840 // LOC_Os01g28500 // LOC_Os08g09060 // LOC_Os03g21820 // LOC_Os03g04020 // LOC_Os02g46910 // LOC_Os08g08960 // LOC_Os07g29290
GO:0030312	C	external encapsulating structure	8	712	107	24075	0.018	0.28	// LOC_Os11g07090 // LOC_Os07g34580 // LOC_Os06g13040 // LOC_Os11g08870 // LOC_Os06g46670 // LOC_Os01g65790 // LOC_Os02g46910 // LOC_Os08g34900
GO:0005618	C	cell wall	7	712	82	24075	0.014	0.28	// LOC_Os11g07090 // LOC_Os07g34580 // LOC_Os06g13040 // LOC_Os11g08870 // LOC_Os01g65790 // LOC_Os02g46910 // LOC_Os08g34900
GO:0043231	C	intracellular membrane-bounded organelle	38	712	2296	24075	1	1	// LOC_Os06g09660 // LOC_Os08g37580 // LOC_Os02g09830 // LOC_Os01g50940 // LOC_Os01g38610 // LOC_Os04g41570 // LOC_Os06g35960 // LOC_Os05g14180 // LOC_Os02g52480 // LOC_Os09g32510 // LOC_Os02g01355 // LOC_Os03g30200 // LOC_Os03g44540 // LOC_Os04g14690 // LOC_Os01g66890 // LOC_Os05g44810 // LOC_Os08g07280 // LOC_Os01g08320 // LOC_Os04g47080 // LOC_Os02g02820 // LOC_Os08g19650 // LOC_Os01g45624 // …
GO:0044424	C	intracellular part	46	712	3529	24075	1	1	// LOC_Os06g09660 // LOC_Os08g37580 // LOC_Os02g09830 // LOC_Os01g50940 // LOC_Os01g38610 // LOC_Os04g41570 // LOC_Os06g35960 // LOC_Os05g14180 // LOC_Os03g10050 // LOC_Os02g52480 // LOC_Os09g32510 // LOC_Os02g01355 // LOC_Os03g30200 // LOC_Os03g44540 // LOC_Os04g14690 // LOC_Os05g44810 // LOC_Os01g66890 // LOC_Os06g06480 // LOC_Os08g07280 // LOC_Os01g08320 // LOC_Os04g47080 // LOC_Os02g02820 // …
GO:0044422	C	organelle part	6	712	1521	24075	1	1	// LOC_Os06g06480 // LOC_Os12g06870 // LOC_Os01g70820 // LOC_Os05g33300 // LOC_Os04g14690 // LOC_Os03g30200
GO:0043229	C	intracellular organelle	42	712	2859	24075	1	1	// LOC_Os06g09660 // LOC_Os08g37580 // LOC_Os02g09830 // LOC_Os01g50940 // LOC_Os01g38610 // LOC_Os04g41570 // LOC_Os06g35960 // LOC_Os05g14180 // LOC_Os02g52480 // LOC_Os09g32510 // LOC_Os02g01355 // LOC_Os03g30200 // LOC_Os03g44540 // LOC_Os04g14690 // LOC_Os05g44810 // LOC_Os01g66890 // LOC_Os06g06480 // LOC_Os08g07280 // LOC_Os01g08320 // LOC_Os04g47080 // LOC_Os02g02820 // LOC_Os08g19650 // …
GO:0043227	C	membrane-bounded organelle	38	712	2319	24075	1	1	// LOC_Os06g09660 // LOC_Os08g37580 // LOC_Os02g09830 // LOC_Os01g50940 // LOC_Os01g38610 // LOC_Os04g41570 // LOC_Os06g35960 // LOC_Os05g14180 // LOC_Os02g52480 // LOC_Os09g32510 // LOC_Os02g01355 // LOC_Os03g30200 // LOC_Os03g44540 // LOC_Os04g14690 // LOC_Os01g66890 // LOC_Os05g44810 // LOC_Os08g07280 // LOC_Os01g08320 // LOC_Os04g47080 // LOC_Os02g02820 // LOC_Os08g19650 // LOC_Os01g45624 // …
GO:0044446	C	intracellular organelle part	6	712	1521	24075	1	1	// LOC_Os06g06480 // LOC_Os12g06870 // LOC_Os01g70820 // LOC_Os05g33300 // LOC_Os04g14690 // LOC_Os03g30200
GO:0044444	C	cytoplasmic part	6	712	966	24075	1	1	// LOC_Os01g45624 // LOC_Os03g49190 // LOC_Os12g34056 // LOC_Os04g14690 // LOC_Os09g25850 // LOC_Os03g30200
GO:0005737	C	cytoplasm	9	712	1263	24075	1	1	// LOC_Os03g10050 // LOC_Os06g09688 // LOC_Os01g45624 // LOC_Os01g60190 // LOC_Os12g34056 // LOC_Os04g14690 // LOC_Os09g25850 // LOC_Os03g30200 // LOC_Os03g49190
GO:0005634	C	nucleus	33	712	1884	24075	1	1	// LOC_Os06g09660 // LOC_Os08g37580 // LOC_Os02g09830 // LOC_Os01g50940 // LOC_Os01g38610 // LOC_Os04g41570 // LOC_Os06g35960 // LOC_Os05g14180 // LOC_Os02g52480 // LOC_Os09g32510 // LOC_Os02g01355 // LOC_Os03g44540 // LOC_Os01g66890 // LOC_Os08g07280 // LOC_Os01g08320 // LOC_Os04g47080 // LOC_Os02g02820 // LOC_Os08g19650 // LOC_Os02g57250 // LOC_Os01g09930 // LOC_Os05g44810 // LOC_Os07g08460 // …
GO:0044464	C	cell part	167	712	5945	24075	0.79	1	// LOC_Os07g34510 // LOC_Os04g46940 // LOC_Os11g05700 // LOC_Os12g06060 // LOC_Os04g29210 // LOC_Os05g14180 // LOC_Os07g18874 // LOC_Os01g11946 // LOC_Os11g37700 // LOC_Os03g12840 // LOC_Os05g35266 // LOC_Os03g04920 // LOC_Os05g35594 // LOC_Os11g08870 // LOC_Os07g45170 // LOC_Os08g43120 // LOC_Os03g44540 // LOC_Os01g62130 // LOC_Os03g05610 // LOC_Os12g44110 // LOC_Os05g49270 // LOC_Os01g66890 // …
GO:0005623	C	cell	167	712	5945	24075	0.79	1	// LOC_Os07g34510 // LOC_Os04g46940 // LOC_Os11g05700 // LOC_Os12g06060 // LOC_Os04g29210 // LOC_Os05g14180 // LOC_Os07g18874 // LOC_Os01g11946 // LOC_Os11g37700 // LOC_Os03g12840 // LOC_Os05g35266 // LOC_Os03g04920 // LOC_Os05g35594 // LOC_Os11g08870 // LOC_Os07g45170 // LOC_Os08g43120 // LOC_Os03g44540 // LOC_Os01g62130 // LOC_Os03g05610 // LOC_Os12g44110 // LOC_Os05g49270 // LOC_Os01g66890 // …
GO:0005622	C	intracellular	57	712	4116	24075	1	1	// LOC_Os06g09660 // LOC_Os08g37580 // LOC_Os02g09830 // LOC_Os01g62130 // LOC_Os01g38610 // LOC_Os04g41570 // LOC_Os06g35960 // LOC_Os05g14180 // LOC_Os12g39400 // LOC_Os03g10050 // LOC_Os03g12840 // LOC_Os02g52480 // LOC_Os05g18850 // LOC_Os09g32510 // LOC_Os02g01355 // LOC_Os03g30200 // LOC_Os03g44540 // LOC_Os01g50940 // LOC_Os04g14690 // LOC_Os12g39220 // LOC_Os05g44810 // LOC_Os01g15010 // …
GO:0043226	C	organelle	42	712	2859	24075	1	1	// LOC_Os06g09660 // LOC_Os08g37580 // LOC_Os02g09830 // LOC_Os01g50940 // LOC_Os01g38610 // LOC_Os04g41570 // LOC_Os06g35960 // LOC_Os05g14180 // LOC_Os02g52480 // LOC_Os09g32510 // LOC_Os02g01355 // LOC_Os03g30200 // LOC_Os03g44540 // LOC_Os04g14690 // LOC_Os05g44810 // LOC_Os01g66890 // LOC_Os06g06480 // LOC_Os08g07280 // LOC_Os01g08320 // LOC_Os04g47080 // LOC_Os02g02820 // LOC_Os08g19650 // …
GO:0032991	C	macromolecular complex	10	712	1207	24075	1	1	// LOC_Os01g43100 // LOC_Os06g06480 // LOC_Os02g39910 // LOC_Os12g06870 // LOC_Os12g39120 // LOC_Os01g70820 // LOC_Os05g33300 // LOC_Os12g34056 // LOC_Os10g40490 // LOC_Os07g45170

## Sheet: Magenta_KEGG
	ID	Description	GeneRatio	BgRatio	pvalue	p.adjust	qvalue	geneID	Count
dosa00904	dosa00904	Diterpenoid biosynthesis	9/128	41/4520	1.43886e-06	0.000112231	0.000102992	Os02t0568700-00/Os02t0569400-01/Os02t0570400-01/Os02t0571300-01/Os02t0571800-00/Os02t0571900-01/Os04t0179700-01/Os06t0569500-01/Os11t0474800-01	9
dosa00270	dosa00270	Cysteine and methionine metabolism	9/128	109/4520	0.00344999	0.134549	0.123473	Os11t0552000-01/Os03t0171900-01/Os03t0196600-01/Os03t0338000-01/Os06t0573900-00/Os09t0424300-01/Os09t0451000-01/Os09t0451400-01/Os12t0263000-01	9
dosa00650	dosa00650	Butanoate metabolism	4/128	26/4520	0.00565611	0.147059	0.134953	Os02t0112900-00/Os02t0608600-01/Os03t0305000-01/Os03t0310400-01	4
dosa04712	dosa04712	Circadian rhythm - plant	4/128	29/4520	0.00841718	0.164135	0.150623	Os02t0203000-00/Os03t0719800-01/Os07t0695100-01/Os11t0530600-01	4
dosa00460	dosa00460	Cyanoamino acid metabolism	5/128	48/4520	0.0108774	0.169688	0.155719	Os02t0635000-01/Os03t0212800-01/Os04t0650700-01/Os09t0491100-01/Os10t0323500-01	5
dosa04075	dosa04075	Plant hormone signal transduction	13/128	237/4520	0.0158187	0.205643	0.188714	Os01t0178500-02/Os01t0764800-01/Os01t0859300-01/Os02t0817600-01/Os03t0390200-01/Os03t0797800-01/Os04t0617050-01/Os05t0178600-01/Os05t0230700-01/Os05t0523300-01/Os07t0182400-01/Os07t0592600-01/Os09t0280500-01	13
dosa00330	dosa00330	Arginine and proline metabolism	5/128	55/4520	0.0188968	0.210564	0.19323	Os01t0710200-00/Os04t0106300-01/Os09t0424300-01/Os10t0550900-01/Os12t0178000-01	5
dosa00250	dosa00250	Alanine, aspartate and glutamate metabolism	4/128	43/4520	0.0323139	0.280665	0.257561	Os02t0112900-00/Os03t0171900-01/Os03t0338000-01/Os04t0650700-01	4
dosa00790	dosa00790	Folate biosynthesis	3/128	25/4520	0.0323844	0.280665	0.257561	Os02t0273100-01/Os02t0572400-01/Os02t0607700-01	3
dosa00280	dosa00280	Valine, leucine and isoleucine degradation	4/128	46/4520	0.040067	0.312523	0.286796	Os03t0171900-01/Os03t0310400-01/Os03t0338000-01/Os12t0178000-01	4
dosa00591	dosa00591	Linoleic acid metabolism	2/128	14/4520	0.0579807	0.385633	0.353887	Os03t0810900-01/Os12t0559200-01	2
dosa00520	dosa00520	Amino sugar and nucleotide sugar metabolism	8/128	149/4520	0.0593281	0.385633	0.353887	Os04t0493400-01/Os04t0494100-02/Os05t0363200-01/Os05t0399300-01/Os05t0399700-01/Os05t0415700-01/Os10t0542900-01/Os12t0129350-00	8
dosa00590	dosa00590	Arachidonic acid metabolism	2/128	15/4520	0.0656907	0.394144	0.361698	Os02t0607700-01/Os03t0810900-01	2
dosa00740	dosa00740	Riboflavin metabolism	2/128	16/4520	0.0737204	0.410728	0.376916	Os02t0572400-01/Os03t0238600-01	2
dosa00511	dosa00511	Other glycan degradation	2/128	18/4520	0.0906439	0.471348	0.432547	Os05t0415700-01/Os10t0473400-01	2
dosa00260	dosa00260	Glycine, serine and threonine metabolism	4/128	63/4520	0.101978	0.497141	0.456216	Os01t0817700-01/Os03t0171900-01/Os03t0338000-01/Os06t0632200-01	4
dosa02010	dosa02010	ABC transporters	2/128	21/4520	0.117862	0.514318	0.471978	Os02t0190300-01/Os03t0142800-01	2
dosa00410	dosa00410	beta-Alanine metabolism	3/128	43/4520	0.121019	0.514318	0.471978	Os01t0710200-00/Os03t0310400-01/Os12t0178000-01	3
dosa00940	dosa00940	Phenylpropanoid biosynthesis	9/128	205/4520	0.125282	0.514318	0.471978	Os01t0270300-01/Os01t0962700-01/Os02t0697400-01/Os03t0212800-01/Os04t0688600-01/Os07t0115300-01/Os09t0471100-01/Os09t0491100-01/Os10t0323500-01	9
dosa00561	dosa00561	Glycerolipid metabolism	4/128	72/4520	0.145929	0.523404	0.480317	Os03t0810900-01/Os05t0363100-01/Os07t0531600-01/Os12t0178000-01	4
dosa00310	dosa00310	Lysine degradation	2/128	25/4520	0.156757	0.523404	0.480317	Os03t0310400-01/Os12t0178000-01	2
dosa00592	dosa00592	alpha-Linolenic acid metabolism	3/128	49/4520	0.160517	0.523404	0.480317	Os03t0810900-01/Os12t0448900-01/Os12t0559200-01	3
dosa00565	dosa00565	Ether lipid metabolism	2/128	26/4520	0.166831	0.523404	0.480317	Os03t0810900-01/Os09t0421300-01	2
dosa00400	dosa00400	Phenylalanine, tyrosine and tryptophan biosynthesis	3/128	50/4520	0.167449	0.523404	0.480317	Os11t0552000-01/Os03t0264400-01/Os06t0632200-01	3
dosa00053	dosa00053	Ascorbate and aldarate metabolism	3/128	51/4520	0.174468	0.523404	0.480317	Os04t0361500-00/Os06t0232600-01/Os12t0178000-01	3
dosa00071	dosa00071	Fatty acid degradation	3/128	51/4520	0.174468	0.523404	0.480317	Os03t0310400-01/Os10t0159800-01/Os12t0178000-01	3
dosa00600	dosa00600	Sphingolipid metabolism	2/128	30/4520	0.208081	0.581339	0.533482	Os01t0624000-01/Os10t0473400-01	2
dosa00480	dosa00480	Glutathione metabolism	5/128	112/4520	0.210295	0.581339	0.533482	Os01t0369700-01/Os06t0232600-01/Os10t0481300-01/Os10t0525400-01/Os12t0263000-01	5
dosa00380	dosa00380	Tryptophan metabolism	3/128	59/4520	0.233187	0.581339	0.533482	Os03t0310400-01/Os04t0475600-01/Os12t0178000-01	3
dosa04626	dosa04626	Plant-pathogen interaction	8/128	208/4520	0.235164	0.581339	0.533482	Os02t0731900-01/Os03t0128700-01/Os03t0331700-02/Os04t0311400-01/Os04t0492800-01/Os04t0618700-01/Os06t0598800-01/Os10t0389000-01	8
dosa00941	dosa00941	Flavonoid biosynthesis	2/128	33/4520	0.239663	0.581339	0.533482	Os04t0630400-01/Os11t0530600-01	2
dosa04016	dosa04016	MAPK signaling pathway - plant	6/128	149/4520	0.245902	0.581339	0.533482	Os03t0390200-01/Os04t0556000-01/Os04t0618700-01/Os05t0399300-01/Os05t0399700-01/Os10t0542900-01	6
dosa00603	dosa00603	Glycosphingolipid biosynthesis - globo and isoglobo series	1/128	10/4520	0.249911	0.581339	0.533482	Os05t0415700-01	1
dosa00500	dosa00500	Starch and sucrose metabolism	6/128	152/4520	0.260271	0.581339	0.533482	Os02t0765400-00/Os03t0212800-01/Os09t0491100-01/Os09t0530200-01/Os10t0323500-01/Os11t0236100-01	6
dosa04136	dosa04136	Autophagy - other	2/128	35/4520	0.260857	0.581339	0.533482	Os02t0217600-01/Os04t0624000-01	2
dosa00920	dosa00920	Sulfur metabolism	2/128	37/4520	0.282073	0.585334	0.537148	Os03t0196600-01/Os07t0509800-01	2
dosa00531	dosa00531	Glycosaminoglycan degradation	1/128	12/4520	0.291889	0.585334	0.537148	Os05t0415700-01	1
dosa00905	dosa00905	Brassinosteroid biosynthesis	1/128	12/4520	0.291889	0.585334	0.537148	Os03t0602300-01	1
dosa00062	dosa00062	Fatty acid elongation	2/128	38/4520	0.292667	0.585334	0.537148	Os02t0731900-01/Os06t0598800-01	2
dosa00040	dosa00040	Pentose and glucuronate interconversions	3/128	71/4520	0.326177	0.612344	0.561935	Os05t0542800-01/Os08t0450100-01/Os11t0194000-00	3
dosa00750	dosa00750	Vitamin B6 metabolism	1/128	14/4520	0.331534	0.612344	0.561935	Os10t0100700-01	1
dosa00360	dosa00360	Phenylalanine metabolism	2/128	42/4520	0.334777	0.612344	0.561935	Os11t0552000-01/Os03t0310400-01	2
dosa00010	dosa00010	Glycolysis / Gluconeogenesis	5/128	136/4520	0.341159	0.612344	0.561935	Os01t0817700-01/Os03t0305000-01/Os04t0458300-01/Os10t0159800-01/Os12t0178000-01	5
dosa00340	dosa00340	Histidine metabolism	1/128	15/4520	0.350523	0.612344	0.561935	Os12t0178000-01	1
dosa00350	dosa00350	Tyrosine metabolism	2/128	44/4520	0.355579	0.612344	0.561935	Os11t0552000-01/Os10t0159800-01	2
dosa00130	dosa00130	Ubiquinone and other terpenoid-quinone biosynthesis	2/128	45/4520	0.365896	0.612344	0.561935	Os11t0552000-01/Os02t0697400-01	2
dosa00290	dosa00290	Valine, leucine and isoleucine biosynthesis	1/128	16/4520	0.368976	0.612344	0.561935	Os02t0608600-01	1
dosa00620	dosa00620	Pyruvate metabolism	3/128	80/4520	0.396364	0.643639	0.590653	Os11t0591550-00/Os03t0305000-01/Os12t0178000-01	3
dosa00670	dosa00670	One carbon pool by folate	1/128	18/4520	0.404337	0.643639	0.590653	Os03t0815200-01	1
dosa01230	dosa01230	Biosynthesis of amino acids	7/128	224/4520	0.450732	0.703142	0.645258	Os11t0552000-01/Os01t0817700-01/Os02t0608600-01/Os03t0196600-01/Os03t0264400-01/Os04t0106300-01/Os06t0632200-01	7
dosa00950	dosa00950	Isoquinoline alkaloid biosynthesis	1/128	22/4520	0.469266	0.717701	0.658619	Os11t0552000-01	1
dosa00564	dosa00564	Glycerophospholipid metabolism	3/128	99/4520	0.536216	0.724298	0.664673	Os03t0810900-01/Os07t0531600-01/Os09t0421300-01	3
dosa00220	dosa00220	Arginine biosynthesis	1/128	27/4520	0.540634	0.724298	0.664673	Os04t0106300-01	1
dosa00770	dosa00770	Pantothenate and CoA biosynthesis	1/128	27/4520	0.540634	0.724298	0.664673	Os02t0608600-01	1
dosa00910	dosa00910	Nitrogen metabolism	1/128	27/4520	0.540634	0.724298	0.664673	Os10t0471300-01	1
dosa00960	dosa00960	Tropane, piperidine and pyridine alkaloid biosynthesis	1/128	27/4520	0.540634	0.724298	0.664673	Os11t0552000-01	1
dosa00073	dosa00073	Cutin, suberine and wax biosynthesis	1/128	28/4520	0.553721	0.724298	0.664673	Os02t0596300-01	1
dosa00906	dosa00906	Carotenoid biosynthesis	1/128	28/4520	0.553721	0.724298	0.664673	Os09t0457100-01	1
dosa00513	dosa00513	Various types of N-glycan biosynthesis	1/128	29/4520	0.566438	0.724298	0.664673	Os05t0415700-01	1
dosa00640	dosa00640	Propanoate metabolism	1/128	29/4520	0.566438	0.724298	0.664673	Os03t0310400-01	1
dosa00908	dosa00908	Zeatin biosynthesis	1/128	29/4520	0.566438	0.724298	0.664673	Os05t0374200-00	1
dosa04144	dosa04144	Endocytosis	4/128	146/4520	0.598913	0.753471	0.691445	Os03t0821100-01/Os05t0102900-01/Os09t0421300-01/Os09t0527600-01	4
dosa00860	dosa00860	Porphyrin and chlorophyll metabolism	1/128	37/4520	0.656039	0.812239	0.745375	Os09t0532000-01	1
dosa00100	dosa00100	Steroid biosynthesis	1/128	39/4520	0.675403	0.823147	0.755385	Os03t0810900-01	1
dosa03410	dosa03410	Base excision repair	1/128	41/4520	0.693684	0.832421	0.763895	Os06t0237900-00	1
dosa00061	dosa00061	Fatty acid biosynthesis	1/128	45/4520	0.727238	0.859463	0.788711	Os09t0505300-01	1
dosa00052	dosa00052	Galactose metabolism	1/128	49/4520	0.757141	0.881448	0.808886	Os04t0458300-01	1
dosa01210	dosa01210	2-Oxocarboxylic acid metabolism	1/128	54/4520	0.789985	0.905974	0.831393	Os02t0608600-01	1
dosa00562	dosa00562	Inositol phosphate metabolism	1/128	57/4520	0.807534	0.905974	0.831393	Os03t0230500-01	1
dosa04070	dosa04070	Phosphatidylinositol signaling system	1/128	58/4520	0.813054	0.905974	0.831393	Os03t0230500-01	1
dosa00630	dosa00630	Glyoxylate and dicarboxylate metabolism	1/128	66/4520	0.851915	0.935907	0.858862	Os03t0305000-01	1
dosa01212	dosa01212	Fatty acid metabolism	1/128	77/4520	0.892588	0.95906	0.880109	Os03t0310400-01	1
dosa03040	dosa03040	Spliceosome	3/128	185/4520	0.902229	0.95906	0.880109	Os03t0821100-01/Os05t0427300-03/Os10t0328700-01	3
dosa03008	dosa03008	Ribosome biogenesis in eukaryotes	1/128	83/4520	0.909877	0.95906	0.880109	Os02t0543300-00	1
dosa01200	dosa01200	Carbon metabolism	4/128	253/4520	0.934665	0.968458	0.888734	Os01t0817700-01/Os03t0196600-01/Os03t0305000-01/Os03t0815200-01	4
dosa03015	dosa03015	mRNA surveillance pathway	1/128	99/4520	0.943626	0.968458	0.888734	Os02t0217600-01	1
dosa04120	dosa04120	Ubiquitin mediated proteolysis	1/128	112/4520	0.961543	0.974031	0.893847	Os03t0348900-01	1
dosa04141	dosa04141	Protein processing in endoplasmic reticulum	2/128	197/4520	0.978512	0.978512	0.89796	Os03t0821100-01/Os07t0497400-01	2

## Sheet: Blue_GO
GO_acc	term_type	Term	queryitem	querytotal	bgitem	bgtotal	pvalue	FDR	entries
GO:0000166	F	nucleotide binding	792	2811	3874	24075	9.7e-52	1.2e-49	// LOC_Os02g08360 // LOC_Os03g37720 // LOC_Os11g11790 // LOC_Os09g02650 // LOC_Os02g20980 // LOC_Os08g07774 // LOC_Os01g71320 // LOC_Os07g33730 // LOC_Os03g21730 // LOC_Os03g64200 // LOC_Os01g54080 // LOC_Os02g49310 // LOC_Os01g02360 // LOC_Os04g56160 // LOC_Os04g35920 // LOC_Os06g09180 // LOC_Os04g35080 // LOC_Os02g43870 // LOC_Os02g46090 // LOC_Os11g01140 // LOC_Os01g42950 // LOC_Os02g12850 // …
GO:0016301	F	kinase activity	366	2811	1750	24075	1.3e-23	7.5e-22	// LOC_Os01g71320 // LOC_Os03g21730 // LOC_Os02g49310 // LOC_Os01g02360 // LOC_Os12g34320 // LOC_Os06g09180 // LOC_Os01g72690 // LOC_Os02g43870 // LOC_Os02g46090 // LOC_Os11g01140 // LOC_Os01g42950 // LOC_Os10g06740 // LOC_Os10g32830 // LOC_Os05g39090 // LOC_Os03g27990 // LOC_Os01g32660 // LOC_Os03g03570 // LOC_Os07g43350 // LOC_Os09g39320 // LOC_Os05g41640 // LOC_Os04g59000 // LOC_Os07g41140 // …
GO:0006464	P	protein modification process	386	2811	1929	24075	6.1e-22	9.6e-20	// LOC_Os04g35270 // LOC_Os03g21730 // LOC_Os02g49310 // LOC_Os01g02360 // LOC_Os03g01150 // LOC_Os12g34320 // LOC_Os06g09180 // LOC_Os02g43870 // LOC_Os02g46090 // LOC_Os11g01140 // LOC_Os01g42950 // LOC_Os10g06740 // LOC_Os05g50970 // LOC_Os05g39090 // LOC_Os05g02500 // LOC_Os03g27990 // LOC_Os01g22550 // LOC_Os01g32660 // LOC_Os06g16410 // LOC_Os03g03570 // LOC_Os07g43350 // LOC_Os09g39320 // …
GO:0043412	P	macromolecule modification	393	2811	1979	24075	7.8e-22	9.6e-20	// LOC_Os04g35270 // LOC_Os03g21730 // LOC_Os02g49310 // LOC_Os01g02360 // LOC_Os03g01150 // LOC_Os12g34320 // LOC_Os06g09180 // LOC_Os02g43870 // LOC_Os02g46090 // LOC_Os11g01140 // LOC_Os01g42950 // LOC_Os10g06740 // LOC_Os05g50970 // LOC_Os05g39090 // LOC_Os05g02500 // LOC_Os03g27990 // LOC_Os01g22550 // LOC_Os01g32660 // LOC_Os06g16410 // LOC_Os03g03570 // LOC_Os07g43350 // LOC_Os09g39320 // …
GO:0044267	P	cellular protein metabolic process	513	2811	2877	24075	7.1e-20	5.8e-18	// LOC_Os04g35270 // LOC_Os12g41820 // LOC_Os03g21730 // LOC_Os02g49310 // LOC_Os01g02360 // LOC_Os03g01150 // LOC_Os12g34320 // LOC_Os06g09180 // LOC_Os04g46190 // LOC_Os02g43870 // LOC_Os02g46090 // LOC_Os11g01140 // LOC_Os01g42950 // LOC_Os10g06740 // LOC_Os06g46930 // LOC_Os05g39090 // LOC_Os05g02500 // LOC_Os02g18380 // LOC_Os03g27990 // LOC_Os01g22550 // LOC_Os01g32660 // LOC_Os06g16410 // …
GO:0016265	P	death	150	2811	544	24075	2.5e-18	1.2e-16	// LOC_Os09g20020 // LOC_Os05g30220 // LOC_Os07g33730 // LOC_Os03g37720 // LOC_Os11g11810 // LOC_Os11g11790 // LOC_Os11g44580 // LOC_Os02g18070 // LOC_Os11g11950 // LOC_Os08g07774 // LOC_Os12g09739 // LOC_Os01g72410 // LOC_Os02g30150 // LOC_Os12g17490 // LOC_Os08g12740 // LOC_Os02g10900 // LOC_Os12g17090 // LOC_Os05g31550 // LOC_Os11g46080 // LOC_Os04g53030 // LOC_Os11g11920 // LOC_Os03g48370 // …
GO:0008219	P	cell death	150	2811	544	24075	2.5e-18	1.2e-16	// LOC_Os09g20020 // LOC_Os05g30220 // LOC_Os07g33730 // LOC_Os03g37720 // LOC_Os11g11810 // LOC_Os11g11790 // LOC_Os11g44580 // LOC_Os02g18070 // LOC_Os11g11950 // LOC_Os08g07774 // LOC_Os12g09739 // LOC_Os01g72410 // LOC_Os02g30150 // LOC_Os12g17490 // LOC_Os08g12740 // LOC_Os02g10900 // LOC_Os12g17090 // LOC_Os05g31550 // LOC_Os11g46080 // LOC_Os04g53030 // LOC_Os11g11920 // LOC_Os03g48370 // …
GO:0005515	F	protein binding	420	2811	2460	24075	1.4e-13	5.6e-12	// LOC_Os12g10930 // LOC_Os12g41820 // LOC_Os03g21730 // LOC_Os08g26880 // LOC_Os12g40550 // LOC_Os03g52310 // LOC_Os07g41740 // LOC_Os02g46090 // LOC_Os10g06740 // LOC_Os01g04720 // LOC_Os05g39090 // LOC_Os06g43670 // LOC_Os03g27990 // LOC_Os09g14100 // LOC_Os03g03570 // LOC_Os07g43350 // LOC_Os08g36774 // LOC_Os10g20600 // LOC_Os07g41140 // LOC_Os11g39310 // LOC_Os04g31940 // LOC_Os02g44700 // …
GO:0050896	P	response to stimulus	204	2811	1026	24075	1.1e-11	4.7e-10	// LOC_Os09g20020 // LOC_Os05g30220 // LOC_Os07g33730 // LOC_Os03g37720 // LOC_Os11g11810 // LOC_Os03g54084 // LOC_Os11g44580 // LOC_Os11g11950 // LOC_Os08g07774 // LOC_Os12g09739 // LOC_Os04g39150 // LOC_Os12g29520 // LOC_Os02g30150 // LOC_Os05g37350 // LOC_Os12g17490 // LOC_Os11g34880 // LOC_Os11g16580 // LOC_Os04g58630 // LOC_Os12g17090 // LOC_Os05g31550 // LOC_Os11g46080 // LOC_Os01g07590 // …
GO:0016020	C	membrane	359	2811	2115	24075	2.2e-11	3.9e-09	// LOC_Os04g35270 // LOC_Os08g25900 // LOC_Os02g20980 // LOC_Os07g43890 // LOC_Os03g64200 // LOC_Os06g15170 // LOC_Os03g07820 // LOC_Os02g02110 // LOC_Os04g56160 // LOC_Os03g05180 // LOC_Os01g48680 // LOC_Os01g34880 // LOC_Os06g13210 // LOC_Os02g50210 // LOC_Os12g07670 // LOC_Os01g48440 // LOC_Os08g15170 // LOC_Os05g08370 // LOC_Os11g29490 // LOC_Os03g19590 // LOC_Os01g22550 // LOC_Os12g39660 // …
GO:0006950	P	response to stress	175	2811	873	24075	2.1e-10	7.3e-09	// LOC_Os09g20020 // LOC_Os05g30220 // LOC_Os07g33730 // LOC_Os03g37720 // LOC_Os11g11810 // LOC_Os11g44580 // LOC_Os11g11950 // LOC_Os08g07774 // LOC_Os12g09739 // LOC_Os02g30150 // LOC_Os05g37350 // LOC_Os12g17490 // LOC_Os11g16580 // LOC_Os04g58630 // LOC_Os12g17090 // LOC_Os05g31550 // LOC_Os11g46080 // LOC_Os01g07590 // LOC_Os04g53030 // LOC_Os11g11920 // LOC_Os03g48370 // LOC_Os06g43670 // …
GO:0007165	P	signal transduction	70	2811	240	24075	3.8e-10	1.2e-08	// LOC_Os07g05620 // LOC_Os11g37690 // LOC_Os07g48760 // LOC_Os01g55530 // LOC_Os01g60910 // LOC_Os03g49500 // LOC_Os03g20720 // LOC_Os03g54084 // LOC_Os12g03810 // LOC_Os02g11820 // LOC_Os02g39560 // LOC_Os01g35184 // LOC_Os07g46450 // LOC_Os03g19590 // LOC_Os12g37360 // LOC_Os12g37570 // LOC_Os10g42420 // LOC_Os08g02860 // LOC_Os10g21810 // LOC_Os07g17360 // LOC_Os01g68010 // LOC_Os11g19800 // …
GO:0044464	C	cell part	847	2811	5945	24075	3.8e-10	2.2e-08	// LOC_Os04g35270 // LOC_Os08g25900 // LOC_Os10g30100 // LOC_Os06g11410 // LOC_Os02g20980 // LOC_Os07g43890 // LOC_Os05g51480 // LOC_Os03g64200 // LOC_Os12g31430 // LOC_Os03g07820 // LOC_Os02g02110 // LOC_Os07g30810 // LOC_Os06g06750 // LOC_Os03g05180 // LOC_Os01g48680 // LOC_Os01g40670 // LOC_Os02g09100 // LOC_Os01g34880 // LOC_Os06g13210 // LOC_Os06g51530 // LOC_Os02g50210 // LOC_Os03g07540 // …
GO:0005623	C	cell	847	2811	5945	24075	3.8e-10	2.2e-08	// LOC_Os04g35270 // LOC_Os08g25900 // LOC_Os10g30100 // LOC_Os06g11410 // LOC_Os02g20980 // LOC_Os07g43890 // LOC_Os05g51480 // LOC_Os03g64200 // LOC_Os12g31430 // LOC_Os03g07820 // LOC_Os02g02110 // LOC_Os07g30810 // LOC_Os06g06750 // LOC_Os03g05180 // LOC_Os01g48680 // LOC_Os01g40670 // LOC_Os02g09100 // LOC_Os01g34880 // LOC_Os06g13210 // LOC_Os06g51530 // LOC_Os02g50210 // LOC_Os03g07540 // …
GO:0016817	F	hydrolase activity, acting on acid anhydrides	145	2811	764	24075	1.4e-07	3.8e-06	// LOC_Os06g02560 // LOC_Os09g02650 // LOC_Os11g44580 // LOC_Os02g20980 // LOC_Os11g42800 // LOC_Os03g64200 // LOC_Os01g54080 // LOC_Os04g20220 // LOC_Os04g51610 // LOC_Os04g56160 // LOC_Os02g47600 // LOC_Os03g08560 // LOC_Os03g19530 // LOC_Os05g04610 // LOC_Os04g13210 // LOC_Os09g39960 // LOC_Os02g19150 // LOC_Os03g56260 // LOC_Os01g36860 // LOC_Os11g29490 // LOC_Os01g57110 // LOC_Os04g57140 // …
GO:0016818	F	hydrolase activity, acting on acid anhydrides, in phosphorus-containing anhydrides	144	2811	759	24075	1.6e-07	3.8e-06	// LOC_Os06g02560 // LOC_Os09g02650 // LOC_Os11g44580 // LOC_Os02g20980 // LOC_Os11g42800 // LOC_Os03g64200 // LOC_Os01g54080 // LOC_Os04g20220 // LOC_Os04g51610 // LOC_Os04g56160 // LOC_Os02g47600 // LOC_Os03g08560 // LOC_Os03g19530 // LOC_Os05g04610 // LOC_Os04g13210 // LOC_Os09g39960 // LOC_Os02g19150 // LOC_Os03g56260 // LOC_Os01g36860 // LOC_Os11g29490 // LOC_Os01g57110 // LOC_Os04g57140 // …
GO:0051179	P	localization	270	2811	1651	24075	1.6e-07	4.5e-06	// LOC_Os06g10760 // LOC_Os03g63250 // LOC_Os05g49260 // LOC_Os09g23110 // LOC_Os02g57240 // LOC_Os05g46720 // LOC_Os02g53490 // LOC_Os04g51970 // LOC_Os07g43890 // LOC_Os01g73230 // LOC_Os07g14540 // LOC_Os12g44360 // LOC_Os04g51610 // LOC_Os04g56160 // LOC_Os08g38850 // LOC_Os10g02260 // LOC_Os01g48680 // LOC_Os03g42320 // LOC_Os02g44570 // LOC_Os05g45310 // LOC_Os05g04610 // LOC_Os04g13210 // …
GO:0006810	P	transport	266	2811	1638	24075	3.4e-07	7.7e-06	// LOC_Os06g10760 // LOC_Os03g63250 // LOC_Os05g49260 // LOC_Os09g23110 // LOC_Os02g57240 // LOC_Os05g46720 // LOC_Os02g53490 // LOC_Os04g51970 // LOC_Os07g43890 // LOC_Os01g73230 // LOC_Os07g14540 // LOC_Os12g44360 // LOC_Os04g51610 // LOC_Os04g56160 // LOC_Os08g38850 // LOC_Os10g02260 // LOC_Os01g48680 // LOC_Os03g42320 // LOC_Os02g44570 // LOC_Os05g04610 // LOC_Os04g13210 // LOC_Os02g10740 // …
GO:0051234	P	establishment of localization	266	2811	1638	24075	3.4e-07	7.7e-06	// LOC_Os06g10760 // LOC_Os03g63250 // LOC_Os05g49260 // LOC_Os09g23110 // LOC_Os02g57240 // LOC_Os05g46720 // LOC_Os02g53490 // LOC_Os04g51970 // LOC_Os07g43890 // LOC_Os01g73230 // LOC_Os07g14540 // LOC_Os12g44360 // LOC_Os04g51610 // LOC_Os04g56160 // LOC_Os08g38850 // LOC_Os10g02260 // LOC_Os01g48680 // LOC_Os03g42320 // LOC_Os02g44570 // LOC_Os05g04610 // LOC_Os04g13210 // LOC_Os02g10740 // …
GO:0065007	P	biological regulation	330	2811	2125	24075	5.4e-07	1.1e-05	// LOC_Os01g50720 // LOC_Os03g58130 // LOC_Os05g26820 // LOC_Os01g67770 // LOC_Os02g50860 // LOC_Os06g02560 // LOC_Os09g39420 // LOC_Os03g07450 // LOC_Os03g54084 // LOC_Os12g03810 // LOC_Os02g57200 // LOC_Os05g34110 // LOC_Os02g38340 // LOC_Os02g29550 // LOC_Os07g01820 // LOC_Os12g29520 // LOC_Os04g33440 // LOC_Os08g33660 // LOC_Os01g09720 // LOC_Os08g26880 // LOC_Os05g37170 // LOC_Os08g42550 // …
GO:0004871	F	signal transducer activity	44	2811	152	24075	7.8e-07	1.2e-05	// LOC_Os08g06060 // LOC_Os04g47590 // LOC_Os03g43990 // LOC_Os03g10800 // LOC_Os08g03650 // LOC_Os03g54084 // LOC_Os09g25330 // LOC_Os02g08500 // LOC_Os05g05160 // LOC_Os12g37570 // LOC_Os01g67770 // LOC_Os01g55530 // LOC_Os10g21810 // LOC_Os07g33790 // LOC_Os03g50860 // LOC_Os12g02540 // LOC_Os02g50480 // LOC_Os11g01140 // LOC_Os03g19590 // LOC_Os02g57530 // LOC_Os05g49140 // LOC_Os03g49500 // …
GO:0016462	F	pyrophosphatase activity	138	2811	743	24075	8e-07	1.2e-05	// LOC_Os09g02650 // LOC_Os11g44580 // LOC_Os02g20980 // LOC_Os11g42800 // LOC_Os03g64200 // LOC_Os01g54080 // LOC_Os04g20220 // LOC_Os04g51610 // LOC_Os04g56160 // LOC_Os02g47600 // LOC_Os03g08560 // LOC_Os03g19530 // LOC_Os05g04610 // LOC_Os04g13210 // LOC_Os09g39960 // LOC_Os02g19150 // LOC_Os03g56260 // LOC_Os01g36860 // LOC_Os11g29490 // LOC_Os01g57110 // LOC_Os04g57140 // LOC_Os01g49000 // …
GO:0060089	F	molecular transducer activity	44	2811	152	24075	7.8e-07	1.2e-05	// LOC_Os08g06060 // LOC_Os04g47590 // LOC_Os03g43990 // LOC_Os03g10800 // LOC_Os08g03650 // LOC_Os03g54084 // LOC_Os09g25330 // LOC_Os02g08500 // LOC_Os05g05160 // LOC_Os12g37570 // LOC_Os01g67770 // LOC_Os01g55530 // LOC_Os10g21810 // LOC_Os07g33790 // LOC_Os03g50860 // LOC_Os12g02540 // LOC_Os02g50480 // LOC_Os11g01140 // LOC_Os03g19590 // LOC_Os02g57530 // LOC_Os05g49140 // LOC_Os03g49500 // …
GO:0050789	P	regulation of biological process	316	2811	2027	24075	7.1e-07	1.4e-05	// LOC_Os01g50720 // LOC_Os03g58130 // LOC_Os05g26820 // LOC_Os01g67770 // LOC_Os02g50860 // LOC_Os06g02560 // LOC_Os09g39420 // LOC_Os03g07450 // LOC_Os03g54084 // LOC_Os12g03810 // LOC_Os02g57200 // LOC_Os05g34110 // LOC_Os02g38340 // LOC_Os02g29550 // LOC_Os07g01820 // LOC_Os12g29520 // LOC_Os04g33440 // LOC_Os08g33660 // LOC_Os01g09720 // LOC_Os08g26880 // LOC_Os05g37170 // LOC_Os08g42550 // …
GO:0017111	F	nucleoside-triphosphatase activity	133	2811	726	24075	2.3e-06	3.1e-05	// LOC_Os09g02650 // LOC_Os11g44580 // LOC_Os02g20980 // LOC_Os11g42800 // LOC_Os03g64200 // LOC_Os01g54080 // LOC_Os04g20220 // LOC_Os04g51610 // LOC_Os04g56160 // LOC_Os03g08560 // LOC_Os03g19530 // LOC_Os05g04610 // LOC_Os04g13210 // LOC_Os09g39960 // LOC_Os02g19150 // LOC_Os03g56260 // LOC_Os01g36860 // LOC_Os11g29490 // LOC_Os01g57110 // LOC_Os04g57140 // LOC_Os01g49000 // LOC_Os06g45500 // …
GO:0050794	P	regulation of cellular process	302	2811	1955	24075	2.5e-06	4.5e-05	// LOC_Os01g50720 // LOC_Os03g58130 // LOC_Os05g26820 // LOC_Os01g67770 // LOC_Os02g50860 // LOC_Os06g02560 // LOC_Os09g39420 // LOC_Os03g07450 // LOC_Os03g54084 // LOC_Os12g03810 // LOC_Os02g57200 // LOC_Os05g34110 // LOC_Os02g38340 // LOC_Os02g29550 // LOC_Os07g01820 // LOC_Os12g29520 // LOC_Os04g33440 // LOC_Os08g33660 // LOC_Os01g09720 // LOC_Os08g26880 // LOC_Os05g37170 // LOC_Os08g42550 // …
GO:0005975	P	carbohydrate metabolic process	148	2811	833	24075	2.8e-06	4.7e-05	// LOC_Os04g35270 // LOC_Os10g41550 // LOC_Os07g38790 // LOC_Os05g41640 // LOC_Os10g30156 // LOC_Os01g72340 // LOC_Os04g39900 // LOC_Os05g46200 // LOC_Os05g11060 // LOC_Os04g04254 // LOC_Os01g65460 // LOC_Os01g34880 // LOC_Os02g57990 // LOC_Os09g33710 // LOC_Os07g23944 // LOC_Os04g35030 // LOC_Os08g42390 // LOC_Os07g48750 // LOC_Os07g35480 // LOC_Os01g52250 // LOC_Os01g52450 // LOC_Os01g22550 // …
GO:0019538	P	protein metabolic process	605	2811	4333	24075	4e-06	6.2e-05	// LOC_Os02g27830 // LOC_Os04g35270 // LOC_Os12g41820 // LOC_Os03g21730 // LOC_Os02g49310 // LOC_Os01g02360 // LOC_Os03g01150 // LOC_Os12g34320 // LOC_Os06g09180 // LOC_Os04g46190 // LOC_Os02g43870 // LOC_Os02g46090 // LOC_Os11g01140 // LOC_Os01g42950 // LOC_Os10g06740 // LOC_Os03g43760 // LOC_Os06g46930 // LOC_Os05g39090 // LOC_Os05g02500 // LOC_Os02g18380 // LOC_Os03g27990 // LOC_Os01g22550 // …
GO:0005737	C	cytoplasm	204	2811	1263	24075	1.2e-05	0.00051	// LOC_Os12g37419 // LOC_Os12g10730 // LOC_Os05g18750 // LOC_Os09g27370 // LOC_Os05g01090 // LOC_Os11g11390 // LOC_Os01g56460 // LOC_Os02g02110 // LOC_Os02g46510 // LOC_Os11g43960 // LOC_Os02g10740 // LOC_Os09g34090 // LOC_Os01g27750 // LOC_Os06g51530 // LOC_Os02g50210 // LOC_Os07g28790 // LOC_Os02g57530 // LOC_Os05g24601 // LOC_Os03g26860 // LOC_Os06g46930 // LOC_Os01g51020 // LOC_Os11g05552 // …
GO:0003774	F	motor activity	22	2811	69	24075	0.00014	0.0016	// LOC_Os07g37560 // LOC_Os09g02650 // LOC_Os11g42800 // LOC_Os08g43400 // LOC_Os01g54080 // LOC_Os04g45580 // LOC_Os01g15540 // LOC_Os02g43050 // LOC_Os02g53520 // LOC_Os03g56260 // LOC_Os01g43580 // LOC_Os03g18980 // LOC_Os04g57140 // LOC_Os03g48140 // LOC_Os04g53760 // LOC_Os06g04560 // LOC_Os05g02670 // LOC_Os03g53660 // LOC_Os10g36880 // LOC_Os12g36100 // LOC_Os10g34710 // LOC_Os02g53740
GO:0012505	C	endomembrane system	29	2811	104	24075	9.6e-05	0.0034	// LOC_Os02g46350 // LOC_Os02g46510 // LOC_Os12g06890 // LOC_Os05g46260 // LOC_Os02g02110 // LOC_Os03g50340 // LOC_Os01g39810 // LOC_Os08g36994 // LOC_Os04g52270 // LOC_Os11g28980 // LOC_Os12g01390 // LOC_Os02g02620 // LOC_Os06g49150 // LOC_Os02g57530 // LOC_Os03g22690 // LOC_Os01g48980 // LOC_Os12g31480 // LOC_Os11g01380 // LOC_Os04g46050 // LOC_Os06g33210 // LOC_Os01g64990 // LOC_Os08g37444 // …
GO:0044444	C	cytoplasmic part	154	2811	966	24075	0.00023	0.0068	// LOC_Os12g37419 // LOC_Os05g18750 // LOC_Os09g27370 // LOC_Os05g01090 // LOC_Os11g11390 // LOC_Os01g56460 // LOC_Os02g02110 // LOC_Os02g46510 // LOC_Os11g43960 // LOC_Os02g10740 // LOC_Os09g34090 // LOC_Os06g51530 // LOC_Os02g50210 // LOC_Os07g28790 // LOC_Os02g57530 // LOC_Os03g26860 // LOC_Os06g46930 // LOC_Os01g51020 // LOC_Os11g05552 // LOC_Os03g07290 // LOC_Os02g18380 // LOC_Os07g07310 // …
GO:0009719	P	response to endogenous stimulus	12	2811	30	24075	0.00092	0.013	// LOC_Os05g48870 // LOC_Os02g04810 // LOC_Os01g70270 // LOC_Os04g36054 // LOC_Os04g08740 // LOC_Os12g29520 // LOC_Os04g56850 // LOC_Os11g32110 // LOC_Os02g35140 // LOC_Os02g57530 // LOC_Os06g46410 // LOC_Os08g40900
GO:0006350	P	transcription	235	2811	1629	24075	0.0012	0.016	// LOC_Os01g50720 // LOC_Os01g67770 // LOC_Os06g02560 // LOC_Os03g07450 // LOC_Os03g54084 // LOC_Os02g57200 // LOC_Os05g34110 // LOC_Os02g29550 // LOC_Os07g01820 // LOC_Os12g29520 // LOC_Os04g33440 // LOC_Os08g33660 // LOC_Os01g09720 // LOC_Os08g26880 // LOC_Os05g37170 // LOC_Os08g42550 // LOC_Os03g58830 // LOC_Os02g07770 // LOC_Os01g40670 // LOC_Os03g54170 // LOC_Os02g11780 // LOC_Os02g49840 // …
GO:0019222	P	regulation of metabolic process	239	2811	1664	24075	0.0013	0.017	// LOC_Os01g50720 // LOC_Os01g67770 // LOC_Os06g02560 // LOC_Os03g07450 // LOC_Os03g54084 // LOC_Os02g57200 // LOC_Os02g29550 // LOC_Os07g01820 // LOC_Os12g29520 // LOC_Os04g33440 // LOC_Os08g33660 // LOC_Os01g09720 // LOC_Os08g26880 // LOC_Os05g37170 // LOC_Os08g42550 // LOC_Os03g58830 // LOC_Os02g07770 // LOC_Os01g40670 // LOC_Os03g54170 // LOC_Os02g49840 // LOC_Os05g32270 // LOC_Os11g01140 // …
GO:0005215	F	transporter activity	144	2811	941	24075	0.0016	0.017	// LOC_Os05g49260 // LOC_Os09g23110 // LOC_Os12g37419 // LOC_Os05g46720 // LOC_Os02g53490 // LOC_Os04g51970 // LOC_Os12g34890 // LOC_Os12g44360 // LOC_Os04g51610 // LOC_Os04g56160 // LOC_Os10g02260 // LOC_Os01g48680 // LOC_Os05g04610 // LOC_Os04g13210 // LOC_Os03g43970 // LOC_Os06g13210 // LOC_Os02g33490 // LOC_Os09g34900 // LOC_Os03g13274 // LOC_Os01g21820 // LOC_Os08g25310 // LOC_Os11g29490 // …
GO:0005622	C	intracellular	548	2811	4116	24075	0.00093	0.023	// LOC_Os08g25900 // LOC_Os10g30100 // LOC_Os06g11410 // LOC_Os05g51480 // LOC_Os02g47600 // LOC_Os12g31430 // LOC_Os02g02110 // LOC_Os06g06750 // LOC_Os01g40670 // LOC_Os04g46190 // LOC_Os02g50210 // LOC_Os03g07540 // LOC_Os01g64560 // LOC_Os08g15170 // LOC_Os03g26860 // LOC_Os06g46930 // LOC_Os04g57140 // LOC_Os07g42860 // LOC_Os02g18380 // LOC_Os07g07310 // LOC_Os04g02510 // LOC_Os06g16410 // …
GO:0060255	P	regulation of macromolecule metabolic process	234	2811	1640	24075	0.002	0.025	// LOC_Os01g50720 // LOC_Os01g67770 // LOC_Os06g02560 // LOC_Os03g07450 // LOC_Os03g54084 // LOC_Os02g57200 // LOC_Os02g29550 // LOC_Os07g01820 // LOC_Os12g29520 // LOC_Os04g33440 // LOC_Os08g33660 // LOC_Os01g09720 // LOC_Os08g26880 // LOC_Os05g37170 // LOC_Os08g42550 // LOC_Os03g58830 // LOC_Os02g07770 // LOC_Os01g40670 // LOC_Os03g54170 // LOC_Os02g49840 // LOC_Os05g32270 // LOC_Os11g01140 // …
GO:0010467	P	gene expression	332	2811	2424	24075	0.0025	0.03	// LOC_Os01g50720 // LOC_Os02g08360 // LOC_Os01g67770 // LOC_Os12g07050 // LOC_Os06g02560 // LOC_Os05g18750 // LOC_Os03g07450 // LOC_Os03g54084 // LOC_Os02g57200 // LOC_Os04g36054 // LOC_Os05g34110 // LOC_Os04g36070 // LOC_Os06g36480 // LOC_Os02g29550 // LOC_Os07g01820 // LOC_Os12g29520 // LOC_Os11g11390 // LOC_Os04g53990 // LOC_Os08g33660 // LOC_Os01g09720 // LOC_Os08g26880 // LOC_Os12g35630 // …
GO:0006629	P	lipid metabolic process	86	2811	528	24075	0.0031	0.035	// LOC_Os04g56240 // LOC_Os07g16960 // LOC_Os10g21910 // LOC_Os02g02110 // LOC_Os04g39610 // LOC_Os09g01590 // LOC_Os04g04254 // LOC_Os09g34090 // LOC_Os01g07760 // LOC_Os08g42390 // LOC_Os09g22450 // LOC_Os07g26210 // LOC_Os05g29880 // LOC_Os05g48750 // LOC_Os01g61200 // LOC_Os03g18590 // LOC_Os02g02750 // LOC_Os10g38940 // LOC_Os03g50070 // LOC_Os03g49510 // LOC_Os09g23070 // LOC_Os06g15170 // …
GO:0005856	C	cytoskeleton	19	2811	71	24075	0.0022	0.047	// LOC_Os11g14220 // LOC_Os06g46000 // LOC_Os04g57140 // LOC_Os03g48140 // LOC_Os03g56810 // LOC_Os10g34710 // LOC_Os09g07380 // LOC_Os09g27370 // LOC_Os05g06260 // LOC_Os02g32340 // LOC_Os02g53740 // LOC_Os12g41290 // LOC_Os06g05880 // LOC_Os04g42330 // LOC_Os07g37560 // LOC_Os02g38340 // LOC_Os03g53660 // LOC_Os02g14000 // LOC_Os02g43590
GO:0005654	C	nucleoplasm	15	2811	51	24075	0.0029	0.056	// LOC_Os01g63940 // LOC_Os01g66580 // LOC_Os12g06200 // LOC_Os08g05940 // LOC_Os02g43750 // LOC_Os05g05860 // LOC_Os03g07930 // LOC_Os02g49640 // LOC_Os04g56640 // LOC_Os07g06470 // LOC_Os02g33430 // LOC_Os12g44140 // LOC_Os07g45400 // LOC_Os05g01710 // LOC_Os08g24400
GO:0005783	C	endoplasmic reticulum	27	2811	123	24075	0.0035	0.062	// LOC_Os02g46350 // LOC_Os05g43170 // LOC_Os10g33250 // LOC_Os05g46260 // LOC_Os02g02110 // LOC_Os01g39810 // LOC_Os11g28980 // LOC_Os09g34090 // LOC_Os02g50210 // LOC_Os06g49150 // LOC_Os02g57530 // LOC_Os08g18110 // LOC_Os07g19070 // LOC_Os01g48980 // LOC_Os12g31480 // LOC_Os04g52760 // LOC_Os01g64990 // LOC_Os01g53520 // LOC_Os04g46050 // LOC_Os02g08230 // LOC_Os08g37444 // LOC_Os01g12650 // …
GO:0009628	P	response to abiotic stimulus	18	2811	74	24075	0.0065	0.069	// LOC_Os07g42940 // LOC_Os12g02540 // LOC_Os03g43990 // LOC_Os03g10800 // LOC_Os10g41490 // LOC_Os08g03650 // LOC_Os03g54084 // LOC_Os03g44620 // LOC_Os09g25330 // LOC_Os01g64970 // LOC_Os12g41910 // LOC_Os12g39380 // LOC_Os12g39630 // LOC_Os03g19590 // LOC_Os02g43930 // LOC_Os06g08550 // LOC_Os04g35240 // LOC_Os11g26570
GO:0010468	P	regulation of gene expression	219	2811	1577	24075	0.008	0.082	// LOC_Os01g50720 // LOC_Os01g67770 // LOC_Os06g02560 // LOC_Os03g07450 // LOC_Os03g54084 // LOC_Os02g57200 // LOC_Os02g29550 // LOC_Os07g01820 // LOC_Os12g29520 // LOC_Os04g33440 // LOC_Os08g33660 // LOC_Os01g09720 // LOC_Os08g26880 // LOC_Os05g37170 // LOC_Os08g42550 // LOC_Os03g58830 // LOC_Os02g07770 // LOC_Os01g40670 // LOC_Os03g54170 // LOC_Os02g49840 // LOC_Os05g32270 // LOC_Os11g01140 // …
GO:0031981	C	nuclear lumen	15	2811	56	24075	0.006	0.096	// LOC_Os01g63940 // LOC_Os01g66580 // LOC_Os12g06200 // LOC_Os08g05940 // LOC_Os02g43750 // LOC_Os05g05860 // LOC_Os03g07930 // LOC_Os02g49640 // LOC_Os04g56640 // LOC_Os07g06470 // LOC_Os02g33430 // LOC_Os12g44140 // LOC_Os07g45400 // LOC_Os05g01710 // LOC_Os08g24400
GO:0004872	F	receptor activity	10	2811	33	24075	0.012	0.12	// LOC_Os07g33790 // LOC_Os04g47590 // LOC_Os02g38430 // LOC_Os03g54084 // LOC_Os06g06130 // LOC_Os03g43670 // LOC_Os02g02540 // LOC_Os01g55530 // LOC_Os03g19590 // LOC_Os06g09130
GO:0044428	C	nuclear part	21	2811	97	24075	0.01	0.15	// LOC_Os01g67250 // LOC_Os01g66580 // LOC_Os12g06200 // LOC_Os08g05940 // LOC_Os02g33430 // LOC_Os05g05860 // LOC_Os03g07930 // LOC_Os02g49640 // LOC_Os04g39280 // LOC_Os06g11420 // LOC_Os04g56640 // LOC_Os07g06470 // LOC_Os12g06890 // LOC_Os02g43750 // LOC_Os12g44140 // LOC_Os07g45400 // LOC_Os05g01710 // LOC_Os01g63940 // LOC_Os06g01700 // LOC_Os03g22690 // LOC_Os08g24400
GO:0031974	C	membrane-enclosed lumen	18	2811	80	24075	0.012	0.16	// LOC_Os01g63940 // LOC_Os01g66580 // LOC_Os07g13950 // LOC_Os08g05940 // LOC_Os04g49220 // LOC_Os05g05860 // LOC_Os03g07930 // LOC_Os02g49640 // LOC_Os04g56640 // LOC_Os07g06470 // LOC_Os01g56460 // LOC_Os02g43750 // LOC_Os12g44140 // LOC_Os07g45400 // LOC_Os05g01710 // LOC_Os08g24400 // LOC_Os02g33430 // LOC_Os12g06200
GO:0005794	C	Golgi apparatus	14	2811	56	24075	0.013	0.16	// LOC_Os04g52270 // LOC_Os07g41360 // LOC_Os04g52760 // LOC_Os04g33690 // LOC_Os12g01390 // LOC_Os02g56110 // LOC_Os03g53140 // LOC_Os06g33210 // LOC_Os02g02620 // LOC_Os11g01380 // LOC_Os08g36994 // LOC_Os03g50340 // LOC_Os03g50350 // LOC_Os08g18110
GO:0031975	C	envelope	31	2811	167	24075	0.015	0.16	// LOC_Os12g37419 // LOC_Os12g06890 // LOC_Os07g19460 // LOC_Os01g16510 // LOC_Os03g22690 // LOC_Os03g09110 // LOC_Os07g33790 // LOC_Os03g02270 // LOC_Os11g23170 // LOC_Os11g43960 // LOC_Os02g10740 // LOC_Os05g45740 // LOC_Os06g40200 // LOC_Os01g69250 // LOC_Os07g39710 // LOC_Os08g15170 // LOC_Os07g13950 // LOC_Os06g06130 // LOC_Os03g04460 // LOC_Os04g51310 // LOC_Os03g08680 // LOC_Os03g19890 // …
GO:0043233	C	organelle lumen	16	2811	70	24075	0.016	0.16	// LOC_Os01g63940 // LOC_Os01g66580 // LOC_Os12g06200 // LOC_Os08g05940 // LOC_Os02g33430 // LOC_Os05g05860 // LOC_Os03g07930 // LOC_Os02g49640 // LOC_Os04g56640 // LOC_Os07g06470 // LOC_Os01g56460 // LOC_Os02g43750 // LOC_Os12g44140 // LOC_Os07g45400 // LOC_Os05g01710 // LOC_Os08g24400
GO:0070013	C	intracellular organelle lumen	16	2811	70	24075	0.016	0.16	// LOC_Os01g63940 // LOC_Os01g66580 // LOC_Os12g06200 // LOC_Os08g05940 // LOC_Os02g33430 // LOC_Os05g05860 // LOC_Os03g07930 // LOC_Os02g49640 // LOC_Os04g56640 // LOC_Os07g06470 // LOC_Os01g56460 // LOC_Os02g43750 // LOC_Os12g44140 // LOC_Os07g45400 // LOC_Os05g01710 // LOC_Os08g24400
GO:0005777	C	peroxisome	6	2811	16	24075	0.022	0.21	// LOC_Os05g01090 // LOC_Os10g32960 // LOC_Os05g19480 // LOC_Os11g39220 // LOC_Os08g44240 // LOC_Os06g24704
GO:0042579	C	microbody	6	2811	16	24075	0.022	0.21	// LOC_Os05g01090 // LOC_Os10g32960 // LOC_Os05g19480 // LOC_Os11g39220 // LOC_Os08g44240 // LOC_Os06g24704
GO:0031967	C	organelle envelope	26	2811	142	24075	0.027	0.22	// LOC_Os12g37419 // LOC_Os12g06890 // LOC_Os07g19460 // LOC_Os01g16510 // LOC_Os03g22690 // LOC_Os03g09110 // LOC_Os03g02270 // LOC_Os11g43960 // LOC_Os02g10740 // LOC_Os05g45740 // LOC_Os06g40200 // LOC_Os01g69250 // LOC_Os07g39710 // LOC_Os08g15170 // LOC_Os07g13950 // LOC_Os03g04460 // LOC_Os03g08680 // LOC_Os03g19890 // LOC_Os05g29860 // LOC_Os04g49220 // LOC_Os11g01270 // LOC_Os05g33210 // …
GO:0005739	C	mitochondrion	29	2811	162	24075	0.026	0.22	// LOC_Os12g37419 // LOC_Os07g19460 // LOC_Os01g16510 // LOC_Os01g56460 // LOC_Os03g09110 // LOC_Os04g35180 // LOC_Os03g02270 // LOC_Os11g23170 // LOC_Os01g74640 // LOC_Os02g10740 // LOC_Os05g45740 // LOC_Os06g40200 // LOC_Os01g69250 // LOC_Os07g39710 // LOC_Os08g15170 // LOC_Os01g57460 // LOC_Os07g13950 // LOC_Os07g07310 // LOC_Os03g04460 // LOC_Os03g08680 // LOC_Os03g19890 // LOC_Os05g29860 // …
GO:0032991	C	macromolecular complex	166	2811	1207	24075	0.025	0.22	// LOC_Os09g07380 // LOC_Os08g25900 // LOC_Os06g01304 // LOC_Os05g18750 // LOC_Os02g51180 // LOC_Os08g21840 // LOC_Os11g11390 // LOC_Os06g28590 // LOC_Os01g72340 // LOC_Os02g39410 // LOC_Os01g40670 // LOC_Os01g50980 // LOC_Os01g34880 // LOC_Os06g51530 // LOC_Os08g15170 // LOC_Os03g26860 // LOC_Os06g46930 // LOC_Os01g51020 // LOC_Os07g36130 // LOC_Os11g05552 // LOC_Os06g01700 // LOC_Os03g07290 // …
GO:0007154	P	cell communication	29	2811	170	24075	0.041	0.41	// LOC_Os11g37690 // LOC_Os04g54080 // LOC_Os01g61150 // LOC_Os03g20720 // LOC_Os02g11820 // LOC_Os02g39560 // LOC_Os04g34390 // LOC_Os07g36590 // LOC_Os12g34320 // LOC_Os01g68010 // LOC_Os01g61860 // LOC_Os05g07450 // LOC_Os04g34250 // LOC_Os05g38950 // LOC_Os03g46330 // LOC_Os05g23610 // LOC_Os01g47820 // LOC_Os09g33600 // LOC_Os10g37410 // LOC_Os11g10290 // LOC_Os09g37890 // LOC_Os01g66680 // …
GO:0009056	P	catabolic process	64	2811	433	24075	0.047	0.45	// LOC_Os07g31340 // LOC_Os01g47080 // LOC_Os09g24910 // LOC_Os06g44040 // LOC_Os06g13720 // LOC_Os08g33620 // LOC_Os07g09890 // LOC_Os02g51180 // LOC_Os10g30550 // LOC_Os01g71320 // LOC_Os04g57190 // LOC_Os07g46560 // LOC_Os02g14730 // LOC_Os02g03690 // LOC_Os08g43640 // LOC_Os02g51590 // LOC_Os09g28940 // LOC_Os01g58740 // LOC_Os02g08480 // LOC_Os08g37380 // LOC_Os06g14740 // LOC_Os09g27890 // …
GO:0006519	P	cellular amino acid and derivative metabolic process	57	2811	391	24075	0.069	0.63	// LOC_Os01g46380 // LOC_Os02g33500 // LOC_Os12g10730 // LOC_Os03g60976 // LOC_Os02g35590 // LOC_Os08g33620 // LOC_Os06g01400 // LOC_Os07g27790 // LOC_Os04g43650 // LOC_Os03g17730 // LOC_Os01g48960 // LOC_Os06g40190 // LOC_Os12g02370 // LOC_Os09g25370 // LOC_Os02g14110 // LOC_Os06g14740 // LOC_Os06g44040 // LOC_Os11g14040 // LOC_Os02g09100 // LOC_Os01g03020 // LOC_Os11g01730 // LOC_Os02g53770 // …
GO:0044424	C	intracellular part	440	2811	3529	24075	0.085	0.65	// LOC_Os08g25900 // LOC_Os06g11410 // LOC_Os05g51480 // LOC_Os12g31430 // LOC_Os02g02110 // LOC_Os06g06750 // LOC_Os01g40670 // LOC_Os06g48640 // LOC_Os02g50210 // LOC_Os03g07540 // LOC_Os01g64560 // LOC_Os08g15170 // LOC_Os03g26860 // LOC_Os06g46930 // LOC_Os04g57140 // LOC_Os07g42860 // LOC_Os02g18380 // LOC_Os07g07310 // LOC_Os03g02570 // LOC_Os06g16410 // LOC_Os04g42330 // LOC_Os03g53660 // …
GO:0005886	C	plasma membrane	9	2811	44	24075	0.097	0.71	// LOC_Os07g41360 // LOC_Os02g46510 // LOC_Os06g51270 // LOC_Os12g01390 // LOC_Os11g01380 // LOC_Os11g37130 // LOC_Os01g34880 // LOC_Os12g44380 // LOC_Os01g21820
GO:0065008	P	regulation of biological quality	28	2811	176	24075	0.082	0.72	// LOC_Os03g58130 // LOC_Os04g30800 // LOC_Os04g39430 // LOC_Os01g61350 // LOC_Os07g46410 // LOC_Os11g01530 // LOC_Os05g45310 // LOC_Os03g29240 // LOC_Os02g34530 // LOC_Os04g35290 // LOC_Os01g11920 // LOC_Os03g21000 // LOC_Os05g11990 // LOC_Os01g57460 // LOC_Os11g28340 // LOC_Os05g05590 // LOC_Os04g39280 // LOC_Os02g38340 // LOC_Os02g14000 // LOC_Os02g51850 // LOC_Os04g36640 // LOC_Os01g42960 // …
GO:0030528	F	transcription regulator activity	131	2811	987	24075	0.089	0.82	// LOC_Os03g15440 // LOC_Os01g67770 // LOC_Os02g29550 // LOC_Os07g01820 // LOC_Os12g31430 // LOC_Os08g42550 // LOC_Os03g58830 // LOC_Os10g39130 // LOC_Os03g54170 // LOC_Os05g32270 // LOC_Os06g10820 // LOC_Os03g55164 // LOC_Os03g07540 // LOC_Os02g57530 // LOC_Os07g39480 // LOC_Os01g69920 // LOC_Os02g21090 // LOC_Os06g29020 // LOC_Os12g05680 // LOC_Os03g07930 // LOC_Os01g72330 // LOC_Os03g51910 // …
GO:0044238	P	primary metabolic process	1216	2811	11969	24075	1	1	// LOC_Os02g27830 // LOC_Os01g50720 // LOC_Os01g55390 // LOC_Os10g30100 // LOC_Os02g20980 // LOC_Os01g71320 // LOC_Os02g29550 // LOC_Os04g35270 // LOC_Os03g21730 // LOC_Os05g25870 // LOC_Os08g26880 // LOC_Os02g49310 // LOC_Os01g02360 // LOC_Os05g37350 // LOC_Os06g06750 // LOC_Os03g01150 // LOC_Os12g34320 // LOC_Os06g09180 // LOC_Os02g07770 // LOC_Os01g40670 // LOC_Os02g09100 // LOC_Os03g48610 // …
GO:0042592	P	homeostatic process	23	2811	147	24075	0.12	1	// LOC_Os03g58130 // LOC_Os04g39430 // LOC_Os01g61350 // LOC_Os07g46410 // LOC_Os11g01530 // LOC_Os03g29240 // LOC_Os05g07690 // LOC_Os04g35290 // LOC_Os01g11920 // LOC_Os03g21000 // LOC_Os05g11990 // LOC_Os01g57460 // LOC_Os05g05590 // LOC_Os04g39280 // LOC_Os02g51850 // LOC_Os04g36640 // LOC_Os01g42960 // LOC_Os05g47930 // LOC_Os10g20310 // LOC_Os02g34530 // LOC_Os07g48510 // LOC_Os02g34940 // …
GO:0044249	P	cellular biosynthetic process	471	2811	5890	24075	1	1	// LOC_Os01g50720 // LOC_Os01g55390 // LOC_Os02g20980 // LOC_Os02g29550 // LOC_Os04g35270 // LOC_Os06g15170 // LOC_Os02g02110 // LOC_Os08g42550 // LOC_Os02g07770 // LOC_Os01g40670 // LOC_Os06g49520 // LOC_Os11g01140 // LOC_Os02g57990 // LOC_Os03g07540 // LOC_Os05g41240 // LOC_Os08g15170 // LOC_Os05g08370 // LOC_Os11g29490 // LOC_Os02g18380 // LOC_Os04g45060 // LOC_Os01g22550 // LOC_Os12g39660 // …
GO:0006807	P	nitrogen compound metabolic process	456	2811	7073	24075	1	1	// LOC_Os01g50720 // LOC_Os01g55390 // LOC_Os10g30100 // LOC_Os02g20980 // LOC_Os02g29550 // LOC_Os02g08360 // LOC_Os05g25870 // LOC_Os08g26880 // LOC_Os05g37350 // LOC_Os08g42550 // LOC_Os02g07770 // LOC_Os01g40670 // LOC_Os06g49520 // LOC_Os11g01140 // LOC_Os03g07540 // LOC_Os05g41240 // LOC_Os08g15170 // LOC_Os04g49100 // LOC_Os11g29490 // LOC_Os04g45060 // LOC_Os07g07310 // LOC_Os12g39660 // …
GO:0034645	P	cellular macromolecule biosynthetic process	366	2811	5248	24075	1	1	// LOC_Os01g50720 // LOC_Os04g35270 // LOC_Os02g29550 // LOC_Os01g55390 // LOC_Os08g26880 // LOC_Os02g02110 // LOC_Os08g42550 // LOC_Os02g07770 // LOC_Os01g40670 // LOC_Os01g34880 // LOC_Os11g01140 // LOC_Os02g57990 // LOC_Os03g07540 // LOC_Os05g41240 // LOC_Os05g08370 // LOC_Os06g46930 // LOC_Os02g18380 // LOC_Os04g45060 // LOC_Os01g22550 // LOC_Os03g39284 // LOC_Os12g32250 // LOC_Os02g56990 // …
GO:0000003	P	reproduction	11	2811	133	24075	0.9	1	// LOC_Os05g07450 // LOC_Os04g54080 // LOC_Os04g34250 // LOC_Os11g10290 // LOC_Os01g66680 // LOC_Os09g37890 // LOC_Os04g34390 // LOC_Os07g36590 // LOC_Os01g47820 // LOC_Os06g40030 // LOC_Os12g34320
GO:0044260	P	cellular macromolecule metabolic process	872	2811	9350	24075	1	1	// LOC_Os01g50720 // LOC_Os01g55390 // LOC_Os01g71320 // LOC_Os02g29550 // LOC_Os04g35270 // LOC_Os03g21730 // LOC_Os05g25870 // LOC_Os08g26880 // LOC_Os02g49310 // LOC_Os01g02360 // LOC_Os05g37350 // LOC_Os06g06750 // LOC_Os03g01150 // LOC_Os12g34320 // LOC_Os06g09180 // LOC_Os02g07770 // LOC_Os01g40670 // LOC_Os02g09100 // LOC_Os01g34880 // LOC_Os02g46090 // LOC_Os11g01140 // LOC_Os01g42950 // …
GO:0016043	P	cellular component organization	71	2811	1240	24075	1	1	// LOC_Os03g63250 // LOC_Os11g14220 // LOC_Os04g35180 // LOC_Os04g33480 // LOC_Os09g27370 // LOC_Os02g55150 // LOC_Os03g51250 // LOC_Os07g40510 // LOC_Os02g43750 // LOC_Os12g41290 // LOC_Os10g32960 // LOC_Os03g03990 // LOC_Os02g43590 // LOC_Os11g09418 // LOC_Os03g10070 // LOC_Os05g41172 // LOC_Os10g17770 // LOC_Os10g28230 // LOC_Os04g45990 // LOC_Os03g02270 // LOC_Os12g25120 // LOC_Os06g46000 // …
GO:0015979	P	photosynthesis	6	2811	115	24075	0.99	1	// LOC_Os01g43070 // LOC_Os08g25900 // LOC_Os10g32400 // LOC_Os03g52130 // LOC_Os10g21406 // LOC_Os05g50550
GO:0009856	P	pollination	11	2811	114	24075	0.77	1	// LOC_Os05g07450 // LOC_Os04g54080 // LOC_Os04g34250 // LOC_Os11g10290 // LOC_Os01g66680 // LOC_Os09g37890 // LOC_Os04g34390 // LOC_Os07g36590 // LOC_Os01g47820 // LOC_Os06g40030 // LOC_Os12g34320
GO:0019725	P	cellular homeostasis	21	2811	140	24075	0.17	1	// LOC_Os03g58130 // LOC_Os05g07690 // LOC_Os11g01530 // LOC_Os03g29240 // LOC_Os02g34530 // LOC_Os04g36640 // LOC_Os01g42960 // LOC_Os04g35290 // LOC_Os01g11920 // LOC_Os04g39430 // LOC_Os05g47930 // LOC_Os10g20310 // LOC_Os03g21000 // LOC_Os05g11990 // LOC_Os01g61350 // LOC_Os07g48510 // LOC_Os01g57460 // LOC_Os02g34940 // LOC_Os05g16630 // LOC_Os07g46410 // LOC_Os02g51850
GO:0032501	P	multicellular organismal process	15	2811	154	24075	0.78	1	// LOC_Os05g07450 // LOC_Os04g54080 // LOC_Os04g34250 // LOC_Os03g54084 // LOC_Os04g34390 // LOC_Os11g10290 // LOC_Os01g66680 // LOC_Os09g37890 // LOC_Os07g46560 // LOC_Os03g19590 // LOC_Os07g36590 // LOC_Os01g47820 // LOC_Os06g40030 // LOC_Os03g24040 // LOC_Os12g34320
GO:0006139	P	nucleobase, nucleoside, nucleotide and nucleic acid metabolic process	398	2811	6695	24075	1	1	// LOC_Os01g50720 // LOC_Os01g55390 // LOC_Os10g30100 // LOC_Os02g20980 // LOC_Os02g29550 // LOC_Os02g08360 // LOC_Os05g25870 // LOC_Os08g26880 // LOC_Os05g37350 // LOC_Os08g42550 // LOC_Os02g07770 // LOC_Os04g49100 // LOC_Os11g01140 // LOC_Os03g07540 // LOC_Os05g41240 // LOC_Os08g15170 // LOC_Os11g29490 // LOC_Os04g45060 // LOC_Os07g07310 // LOC_Os12g39660 // LOC_Os02g47280 // LOC_Os12g32250 // …
GO:0009058	P	biosynthetic process	505	2811	6085	24075	1	1	// LOC_Os01g50720 // LOC_Os01g55390 // LOC_Os02g20980 // LOC_Os02g29550 // LOC_Os04g35270 // LOC_Os06g15170 // LOC_Os02g02110 // LOC_Os08g42550 // LOC_Os02g07770 // LOC_Os01g40670 // LOC_Os06g49520 // LOC_Os11g01140 // LOC_Os02g57990 // LOC_Os03g07540 // LOC_Os05g41240 // LOC_Os08g15170 // LOC_Os05g08370 // LOC_Os06g01470 // LOC_Os11g29490 // LOC_Os02g18380 // LOC_Os04g45060 // LOC_Os01g22550 // …
GO:0022414	P	reproductive process	11	2811	114	24075	0.77	1	// LOC_Os05g07450 // LOC_Os04g54080 // LOC_Os04g34250 // LOC_Os11g10290 // LOC_Os01g66680 // LOC_Os09g37890 // LOC_Os04g34390 // LOC_Os07g36590 // LOC_Os01g47820 // LOC_Os06g40030 // LOC_Os12g34320
GO:0009059	P	macromolecule biosynthetic process	367	2811	5252	24075	1	1	// LOC_Os01g50720 // LOC_Os04g35270 // LOC_Os02g29550 // LOC_Os01g55390 // LOC_Os08g26880 // LOC_Os02g02110 // LOC_Os08g42550 // LOC_Os02g07770 // LOC_Os01g40670 // LOC_Os01g34880 // LOC_Os11g01140 // LOC_Os02g57990 // LOC_Os03g07540 // LOC_Os05g41240 // LOC_Os05g08370 // LOC_Os06g46930 // LOC_Os02g18380 // LOC_Os04g45060 // LOC_Os01g22550 // LOC_Os03g39284 // LOC_Os12g32250 // LOC_Os02g56990 // …
GO:0008152	P	metabolic process	1480	2811	14398	24075	1	1	// LOC_Os04g35270 // LOC_Os08g25900 // LOC_Os02g29550 // LOC_Os02g08360 // LOC_Os01g02360 // LOC_Os05g37350 // LOC_Os06g06750 // LOC_Os01g40670 // LOC_Os06g49520 // LOC_Os02g46090 // LOC_Os03g07540 // LOC_Os07g48750 // LOC_Os11g29490 // LOC_Os02g18380 // LOC_Os03g27990 // LOC_Os01g22550 // LOC_Os01g32660 // LOC_Os12g39660 // LOC_Os06g45910 // LOC_Os01g52450 // LOC_Os02g02750 // LOC_Os07g38300 // …
GO:0019748	P	secondary metabolic process	11	2811	64	24075	0.16	1	// LOC_Os06g14740 // LOC_Os09g38060 // LOC_Os06g05100 // LOC_Os11g01730 // LOC_Os08g43370 // LOC_Os02g04170 // LOC_Os11g29400 // LOC_Os02g39160 // LOC_Os12g02370 // LOC_Os01g39960 // LOC_Os02g56980
GO:0051704	P	multi-organism process	11	2811	120	24075	0.82	1	// LOC_Os05g07450 // LOC_Os04g54080 // LOC_Os04g34250 // LOC_Os11g10290 // LOC_Os01g66680 // LOC_Os09g37890 // LOC_Os04g34390 // LOC_Os07g36590 // LOC_Os01g47820 // LOC_Os06g40030 // LOC_Os12g34320
GO:0006091	P	generation of precursor metabolites and energy	22	2811	243	24075	0.9	1	// LOC_Os08g14860 // LOC_Os01g47080 // LOC_Os09g24910 // LOC_Os06g13720 // LOC_Os07g09890 // LOC_Os10g30550 // LOC_Os05g41640 // LOC_Os06g14740 // LOC_Os05g45740 // LOC_Os10g21406 // LOC_Os10g08550 // LOC_Os07g39710 // LOC_Os08g15170 // LOC_Os02g13840 // LOC_Os06g45120 // LOC_Os02g51590 // LOC_Os03g19890 // LOC_Os01g71320 // LOC_Os08g02640 // LOC_Os05g33210 // LOC_Os02g33730 // LOC_Os08g37380
GO:0044237	P	cellular metabolic process	1081	2811	10696	24075	1	1	// LOC_Os01g50720 // LOC_Os01g55390 // LOC_Os08g25900 // LOC_Os10g30100 // LOC_Os02g20980 // LOC_Os01g71320 // LOC_Os02g29550 // LOC_Os04g35270 // LOC_Os03g21730 // LOC_Os05g25870 // LOC_Os08g26880 // LOC_Os02g49310 // LOC_Os01g02360 // LOC_Os05g37350 // LOC_Os06g06750 // LOC_Os03g01150 // LOC_Os12g34320 // LOC_Os06g09180 // LOC_Os02g07770 // LOC_Os01g40670 // LOC_Os02g09100 // LOC_Os03g48610 // …
GO:0043170	P	macromolecule metabolic process	967	2811	10433	24075	1	1	// LOC_Os02g27830 // LOC_Os01g50720 // LOC_Os01g55390 // LOC_Os01g71320 // LOC_Os02g29550 // LOC_Os04g35270 // LOC_Os03g21730 // LOC_Os05g25870 // LOC_Os08g26880 // LOC_Os02g49310 // LOC_Os01g02360 // LOC_Os05g37350 // LOC_Os06g06750 // LOC_Os03g01150 // LOC_Os12g34320 // LOC_Os06g09180 // LOC_Os02g07770 // LOC_Os01g40670 // LOC_Os02g09100 // LOC_Os01g34880 // LOC_Os02g46090 // LOC_Os11g01140 // …
GO:0009875	P	pollen-pistil interaction	11	2811	114	24075	0.77	1	// LOC_Os05g07450 // LOC_Os04g54080 // LOC_Os04g34250 // LOC_Os11g10290 // LOC_Os01g66680 // LOC_Os09g37890 // LOC_Os04g34390 // LOC_Os07g36590 // LOC_Os01g47820 // LOC_Os06g40030 // LOC_Os12g34320
GO:0006259	P	DNA metabolic process	75	2811	4515	24075	1	1	// LOC_Os04g54500 // LOC_Os07g30980 // LOC_Os01g55390 // LOC_Os03g04150 // LOC_Os01g55900 // LOC_Os03g33240 // LOC_Os08g01130 // LOC_Os05g31230 // LOC_Os01g37350 // LOC_Os12g19180 // LOC_Os07g45410 // LOC_Os08g22004 // LOC_Os08g34300 // LOC_Os05g37350 // LOC_Os02g17292 // LOC_Os09g15250 // LOC_Os12g25350 // LOC_Os01g11920 // LOC_Os10g40650 // LOC_Os09g39330 // LOC_Os04g28860 // LOC_Os04g58630 // …
GO:0009987	P	cellular process	1517	2811	12839	24075	0.27	1	// LOC_Os04g35270 // LOC_Os03g37720 // LOC_Os09g02650 // LOC_Os08g07774 // LOC_Os02g29550 // LOC_Os02g08360 // LOC_Os08g25900 // LOC_Os01g02360 // LOC_Os05g37350 // LOC_Os06g06750 // LOC_Os01g48680 // LOC_Os01g40670 // LOC_Os06g49520 // LOC_Os02g46090 // LOC_Os03g07540 // LOC_Os07g48750 // LOC_Os06g46930 // LOC_Os02g18380 // LOC_Os11g11940 // LOC_Os03g27990 // LOC_Os01g22550 // LOC_Os01g32660 // …
GO:0006412	P	translation	69	2811	595	24075	0.54	1	// LOC_Os02g57670 // LOC_Os06g04290 // LOC_Os02g43600 // LOC_Os07g47780 // LOC_Os05g18750 // LOC_Os09g32520 // LOC_Os06g01400 // LOC_Os05g01110 // LOC_Os01g54540 // LOC_Os01g09000 // LOC_Os11g11390 // LOC_Os03g61260 // LOC_Os03g10070 // LOC_Os12g35630 // LOC_Os02g33500 // LOC_Os07g34589 // LOC_Os07g30640 // LOC_Os07g07719 // LOC_Os03g03020 // LOC_Os03g49580 // LOC_Os01g03020 // LOC_Os04g50990 // …
GO:0003676	F	nucleic acid binding	455	2811	8251	24075	1	1	// LOC_Os01g50720 // LOC_Os01g55390 // LOC_Os10g30100 // LOC_Os02g29550 // LOC_Os02g08360 // LOC_Os05g25870 // LOC_Os08g26880 // LOC_Os08g42550 // LOC_Os03g52310 // LOC_Os02g07770 // LOC_Os01g40670 // LOC_Os04g12540 // LOC_Os05g41240 // LOC_Os03g17010 // LOC_Os02g12850 // LOC_Os09g32300 // LOC_Os04g45060 // LOC_Os07g07310 // LOC_Os02g35150 // LOC_Os01g62650 // LOC_Os02g28074 // LOC_Os07g09760 // …
GO:0030246	F	carbohydrate binding	30	2811	219	24075	0.23	1	// LOC_Os12g24170 // LOC_Os04g54080 // LOC_Os03g48610 // LOC_Os04g34390 // LOC_Os03g06940 // LOC_Os11g10290 // LOC_Os01g66680 // LOC_Os01g39830 // LOC_Os01g72340 // LOC_Os07g36590 // LOC_Os12g34320 // LOC_Os05g07450 // LOC_Os04g34250 // LOC_Os03g26430 // LOC_Os01g65460 // LOC_Os04g12540 // LOC_Os08g44040 // LOC_Os01g47820 // LOC_Os01g63810 // LOC_Os12g41956 // LOC_Os05g07130 // LOC_Os01g22550 // …
GO:0003824	F	catalytic activity	1381	2811	12724	24075	1	1	// LOC_Os04g35270 // LOC_Os09g02650 // LOC_Os10g04429 // LOC_Os03g64200 // LOC_Os04g20220 // LOC_Os05g37350 // LOC_Os06g49520 // LOC_Os02g46090 // LOC_Os01g48440 // LOC_Os07g48750 // LOC_Os11g29490 // LOC_Os06g04280 // LOC_Os03g27990 // LOC_Os01g22550 // LOC_Os01g32660 // LOC_Os12g39660 // LOC_Os03g53660 // LOC_Os06g45910 // LOC_Os01g52450 // LOC_Os02g02750 // LOC_Os11g11890 // LOC_Os11g42800 // …
GO:0003677	F	DNA binding	260	2811	5059	24075	1	1	// LOC_Os01g50720 // LOC_Os01g67770 // LOC_Os04g52380 // LOC_Os02g57200 // LOC_Os02g29550 // LOC_Os07g01820 // LOC_Os12g29520 // LOC_Os01g69830 // LOC_Os08g33660 // LOC_Os01g09720 // LOC_Os08g26880 // LOC_Os09g10770 // LOC_Os06g06750 // LOC_Os03g52310 // LOC_Os03g02240 // LOC_Os11g16580 // LOC_Os02g04680 // LOC_Os01g40670 // LOC_Os03g54170 // LOC_Os02g49840 // LOC_Os05g32270 // LOC_Os09g07640 // …
GO:0016740	F	transferase activity	588	2811	6190	24075	1	1	// LOC_Os01g55390 // LOC_Os01g71320 // LOC_Os04g35270 // LOC_Os10g04429 // LOC_Os05g25870 // LOC_Os06g15170 // LOC_Os02g49310 // LOC_Os01g02360 // LOC_Os03g05180 // LOC_Os12g34320 // LOC_Os06g09180 // LOC_Os01g72690 // LOC_Os01g34880 // LOC_Os02g46090 // LOC_Os11g01140 // LOC_Os01g42950 // LOC_Os01g48440 // LOC_Os10g06740 // LOC_Os05g08370 // LOC_Os06g01470 // LOC_Os06g07120 // LOC_Os10g32830 // …
GO:0003700	F	transcription factor activity	61	2811	651	24075	0.96	1	// LOC_Os10g39130 // LOC_Os01g69850 // LOC_Os04g46020 // LOC_Os12g06200 // LOC_Os08g08820 // LOC_Os03g20910 // LOC_Os02g56250 // LOC_Os04g39570 // LOC_Os02g29550 // LOC_Os07g01820 // LOC_Os06g10880 // LOC_Os06g05380 // LOC_Os08g26880 // LOC_Os06g30830 // LOC_Os08g42550 // LOC_Os06g29020 // LOC_Os07g06470 // LOC_Os03g43930 // LOC_Os12g07120 // LOC_Os09g13575 // LOC_Os10g26500 // LOC_Os05g29810 // …
GO:0008135	F	translation factor activity, nucleic acid binding	12	2811	75	24075	0.2	1	// LOC_Os07g34589 // LOC_Os02g55120 // LOC_Os05g23940 // LOC_Os09g15775 // LOC_Os03g49580 // LOC_Os03g59160 // LOC_Os11g02450 // LOC_Os04g45490 // LOC_Os05g41900 // LOC_Os12g02380 // LOC_Os12g35630 // LOC_Os03g10070
GO:0016787	F	hydrolase activity	438	2811	4901	24075	1	1	// LOC_Os02g27830 // LOC_Os11g17504 // LOC_Os10g30100 // LOC_Os09g02650 // LOC_Os02g20980 // LOC_Os11g15570 // LOC_Os11g42800 // LOC_Os03g64200 // LOC_Os01g54080 // LOC_Os04g20220 // LOC_Os05g37350 // LOC_Os04g56160 // LOC_Os03g01150 // LOC_Os01g52550 // LOC_Os01g55950 // LOC_Os01g36860 // LOC_Os07g48750 // LOC_Os05g50970 // LOC_Os04g57140 // LOC_Os05g02500 // LOC_Os05g05240 // LOC_Os07g07310 // …
GO:0030234	F	enzyme regulator activity	37	2811	255	24075	0.13	1	// LOC_Os11g37690 // LOC_Os10g41520 // LOC_Os09g37270 // LOC_Os04g35180 // LOC_Os10g33310 // LOC_Os03g20720 // LOC_Os02g11820 // LOC_Os10g40270 // LOC_Os01g16430 // LOC_Os08g43640 // LOC_Os08g02860 // LOC_Os07g17360 // LOC_Os01g68010 // LOC_Os01g61860 // LOC_Os11g40030 // LOC_Os05g38950 // LOC_Os03g46330 // LOC_Os05g08560 // LOC_Os05g23610 // LOC_Os03g62730 // LOC_Os07g29780 // LOC_Os03g21080 // …
GO:0008289	F	lipid binding	10	2811	85	24075	0.54	1	// LOC_Os06g11800 // LOC_Os01g61150 // LOC_Os06g20430 // LOC_Os03g59380 // LOC_Os06g07830 // LOC_Os07g46550 // LOC_Os07g07930 // LOC_Os07g39680 // LOC_Os01g36870 // LOC_Os03g61930
GO:0016788	F	hydrolase activity, acting on ester bonds	106	2811	1949	24075	1	1	// LOC_Os12g08270 // LOC_Os10g30100 // LOC_Os04g56240 // LOC_Os06g43640 // LOC_Os02g28074 // LOC_Os05g37350 // LOC_Os04g39610 // LOC_Os03g01150 // LOC_Os02g39410 // LOC_Os04g28860 // LOC_Os05g33270 // LOC_Os08g41270 // LOC_Os11g13420 // LOC_Os05g14510 // LOC_Os05g49120 // LOC_Os08g42390 // LOC_Os05g50970 // LOC_Os03g02970 // LOC_Os12g12850 // LOC_Os09g22450 // LOC_Os05g05240 // LOC_Os01g20940 // …
GO:0003682	F	chromatin binding	10	2811	913	24075	1	1	// LOC_Os06g15570 // LOC_Os04g21580 // LOC_Os03g09990 // LOC_Os12g04830 // LOC_Os03g03990 // LOC_Os09g07640 // LOC_Os02g32230 // LOC_Os06g01320 // LOC_Os10g17770 // LOC_Os05g13780
GO:0016772	F	transferase activity, transferring phosphorus-containing groups	418	2811	4781	24075	1	1	// LOC_Os01g55390 // LOC_Os01g71320 // LOC_Os03g21730 // LOC_Os02g49310 // LOC_Os01g02360 // LOC_Os12g34320 // LOC_Os06g09180 // LOC_Os01g72690 // LOC_Os02g43870 // LOC_Os02g46090 // LOC_Os11g01140 // LOC_Os01g42950 // LOC_Os10g06740 // LOC_Os10g32830 // LOC_Os05g39090 // LOC_Os03g27990 // LOC_Os01g32660 // LOC_Os03g03570 // LOC_Os07g43350 // LOC_Os09g39320 // LOC_Os04g47660 // LOC_Os04g59000 // …
GO:0004518	F	nuclease activity	33	2811	1337	24075	1	1	// LOC_Os04g54500 // LOC_Os01g62440 // LOC_Os04g53200 // LOC_Os03g06190 // LOC_Os10g32060 // LOC_Os01g37350 // LOC_Os04g23830 // LOC_Os08g01130 // LOC_Os05g37350 // LOC_Os01g67190 // LOC_Os07g32890 // LOC_Os11g16580 // LOC_Os08g08050 // LOC_Os04g28860 // LOC_Os01g65400 // LOC_Os05g14510 // LOC_Os05g18780 // LOC_Os03g02970 // LOC_Os07g07310 // LOC_Os01g38620 // LOC_Os04g15610 // LOC_Os10g12354 // …
GO:0003723	F	RNA binding	74	2811	3190	24075	1	1	// LOC_Os06g40240 // LOC_Os07g40700 // LOC_Os04g39060 // LOC_Os01g55390 // LOC_Os01g62440 // LOC_Os05g18750 // LOC_Os01g66300 // LOC_Os06g14550 // LOC_Os05g49220 // LOC_Os01g71200 // LOC_Os01g62650 // LOC_Os06g04290 // LOC_Os02g02390 // LOC_Os03g25970 // LOC_Os08g22004 // LOC_Os10g41030 // LOC_Os12g35630 // LOC_Os09g39330 // LOC_Os01g67190 // LOC_Os03g02970 // LOC_Os07g07719 // LOC_Os05g43374 // …
GO:0005198	F	structural molecule activity	60	2811	462	24075	0.24	1	// LOC_Os02g57670 // LOC_Os06g04290 // LOC_Os06g05180 // LOC_Os07g47780 // LOC_Os05g18750 // LOC_Os05g01110 // LOC_Os01g54540 // LOC_Os01g71050 // LOC_Os11g14220 // LOC_Os11g11390 // LOC_Os04g50990 // LOC_Os03g61260 // LOC_Os06g51530 // LOC_Os02g32760 // LOC_Os07g30640 // LOC_Os07g07719 // LOC_Os06g46000 // LOC_Os03g03020 // LOC_Os12g01390 // LOC_Os03g56810 // LOC_Os08g21840 // LOC_Os08g02800 // …
GO:0005488	F	binding	1891	2811	16823	24075	1	1	// LOC_Os11g01730 // LOC_Os03g37720 // LOC_Os09g02650 // LOC_Os12g10930 // LOC_Os08g07774 // LOC_Os02g29550 // LOC_Os02g08360 // LOC_Os03g64200 // LOC_Os08g25900 // LOC_Os04g20220 // LOC_Os05g37350 // LOC_Os06g06750 // LOC_Os02g57120 // LOC_Os01g48680 // LOC_Os01g40670 // LOC_Os06g49520 // LOC_Os02g46090 // LOC_Os09g31502 // LOC_Os11g29490 // LOC_Os07g04480 // LOC_Os11g11940 // LOC_Os03g27990 // …
GO:0030529	C	ribonucleoprotein complex	48	2811	438	24075	0.68	1	// LOC_Os02g57670 // LOC_Os06g04290 // LOC_Os07g47780 // LOC_Os05g18750 // LOC_Os06g14550 // LOC_Os05g01110 // LOC_Os01g54540 // LOC_Os11g11390 // LOC_Os03g61260 // LOC_Os02g32760 // LOC_Os07g30640 // LOC_Os07g07719 // LOC_Os03g03020 // LOC_Os04g50990 // LOC_Os08g21840 // LOC_Os08g02800 // LOC_Os06g51530 // LOC_Os03g26860 // LOC_Os06g35730 // LOC_Os02g56990 // LOC_Os02g43600 // LOC_Os06g46930 // …
GO:0043231	C	intracellular membrane-bounded organelle	267	2811	2296	24075	0.54	1	// LOC_Os10g07420 // LOC_Os12g37419 // LOC_Os06g11410 // LOC_Os04g52380 // LOC_Os03g53150 // LOC_Os07g01820 // LOC_Os12g29520 // LOC_Os01g69830 // LOC_Os12g31430 // LOC_Os02g02110 // LOC_Os04g33420 // LOC_Os10g17770 // LOC_Os07g34640 // LOC_Os01g40670 // LOC_Os04g21580 // LOC_Os03g54170 // LOC_Os11g40030 // LOC_Os02g10740 // LOC_Os09g34090 // LOC_Os07g10520 // LOC_Os06g10820 // LOC_Os09g07640 // …
GO:0043232	C	intracellular non-membrane-bounded organelle	86	2811	1494	24075	1	1	// LOC_Os09g07380 // LOC_Os05g18750 // LOC_Os09g27370 // LOC_Os11g11390 // LOC_Os05g51790 // LOC_Os10g17770 // LOC_Os01g40670 // LOC_Os04g21580 // LOC_Os06g51530 // LOC_Os09g10770 // LOC_Os06g46930 // LOC_Os01g51020 // LOC_Os07g36130 // LOC_Os06g15570 // LOC_Os04g57140 // LOC_Os03g07290 // LOC_Os01g67250 // LOC_Os02g18380 // LOC_Os12g34510 // LOC_Os04g42330 // LOC_Os03g53660 // LOC_Os02g15610 // …
GO:0005829	C	cytosol	5	2811	34	24075	0.39	1	// LOC_Os01g70330 // LOC_Os07g26974 // LOC_Os03g43020 // LOC_Os10g08550 // LOC_Os09g24910
GO:0044422	C	organelle part	116	2811	1521	24075	1	1	// LOC_Os08g25900 // LOC_Os12g37419 // LOC_Os09g27370 // LOC_Os01g56460 // LOC_Os02g02110 // LOC_Os10g17770 // LOC_Os01g40670 // LOC_Os11g43960 // LOC_Os02g10740 // LOC_Os09g07640 // LOC_Os07g05400 // LOC_Os06g40200 // LOC_Os02g57530 // LOC_Os07g36130 // LOC_Os06g15570 // LOC_Os07g13950 // LOC_Os06g01700 // LOC_Os03g07290 // LOC_Os03g07930 // LOC_Os01g67250 // LOC_Os04g51270 // LOC_Os12g34510 // …
GO:0043229	C	intracellular organelle	340	2811	2859	24075	0.38	1	// LOC_Os10g07420 // LOC_Os09g07380 // LOC_Os08g25900 // LOC_Os12g37419 // LOC_Os06g11410 // LOC_Os05g18750 // LOC_Os02g43600 // LOC_Os09g27370 // LOC_Os08g21840 // LOC_Os02g56140 // LOC_Os07g01820 // LOC_Os12g29520 // LOC_Os11g11390 // LOC_Os08g02800 // LOC_Os05g51790 // LOC_Os12g31430 // LOC_Os02g02110 // LOC_Os06g06750 // LOC_Os10g17770 // LOC_Os03g58830 // LOC_Os07g34640 // LOC_Os01g40670 // …
GO:0043227	C	membrane-bounded organelle	270	2811	2319	24075	0.53	1	// LOC_Os10g07420 // LOC_Os12g37419 // LOC_Os06g11410 // LOC_Os04g52380 // LOC_Os03g53150 // LOC_Os07g01820 // LOC_Os12g29520 // LOC_Os01g69830 // LOC_Os12g31430 // LOC_Os02g02110 // LOC_Os06g06750 // LOC_Os10g17770 // LOC_Os07g34640 // LOC_Os01g40670 // LOC_Os04g21580 // LOC_Os03g54170 // LOC_Os11g40030 // LOC_Os02g10740 // LOC_Os09g34090 // LOC_Os07g10520 // LOC_Os06g10820 // LOC_Os09g07640 // …
GO:0009579	C	thylakoid	6	2811	93	24075	0.95	1	// LOC_Os01g43070 // LOC_Os08g25900 // LOC_Os10g32400 // LOC_Os03g52130 // LOC_Os10g21406 // LOC_Os07g05400
GO:0005840	C	ribosome	43	2811	397	24075	0.7	1	// LOC_Os02g57670 // LOC_Os06g04290 // LOC_Os07g47780 // LOC_Os05g18750 // LOC_Os05g01110 // LOC_Os01g54540 // LOC_Os11g11390 // LOC_Os03g61260 // LOC_Os02g32760 // LOC_Os07g30640 // LOC_Os07g07719 // LOC_Os03g03020 // LOC_Os04g50990 // LOC_Os08g21840 // LOC_Os08g02800 // LOC_Os06g51530 // LOC_Os03g26860 // LOC_Os06g35730 // LOC_Os02g56990 // LOC_Os02g43600 // LOC_Os06g46930 // LOC_Os01g51020 // …
GO:0044446	C	intracellular organelle part	116	2811	1521	24075	1	1	// LOC_Os08g25900 // LOC_Os12g37419 // LOC_Os09g27370 // LOC_Os01g56460 // LOC_Os02g02110 // LOC_Os10g17770 // LOC_Os01g40670 // LOC_Os11g43960 // LOC_Os02g10740 // LOC_Os09g07640 // LOC_Os07g05400 // LOC_Os06g40200 // LOC_Os02g57530 // LOC_Os07g36130 // LOC_Os06g15570 // LOC_Os07g13950 // LOC_Os06g01700 // LOC_Os03g07290 // LOC_Os03g07930 // LOC_Os01g67250 // LOC_Os04g51270 // LOC_Os12g34510 // …
GO:0043226	C	organelle	340	2811	2859	24075	0.38	1	// LOC_Os10g07420 // LOC_Os09g07380 // LOC_Os08g25900 // LOC_Os12g37419 // LOC_Os06g11410 // LOC_Os05g18750 // LOC_Os02g43600 // LOC_Os09g27370 // LOC_Os08g21840 // LOC_Os02g56140 // LOC_Os07g01820 // LOC_Os12g29520 // LOC_Os11g11390 // LOC_Os08g02800 // LOC_Os05g51790 // LOC_Os12g31430 // LOC_Os02g02110 // LOC_Os06g06750 // LOC_Os10g17770 // LOC_Os03g58830 // LOC_Os07g34640 // LOC_Os01g40670 // …
GO:0005634	C	nucleus	184	2811	1884	24075	0.99	1	// LOC_Os03g15440 // LOC_Os06g11410 // LOC_Os04g52380 // LOC_Os07g01820 // LOC_Os12g29520 // LOC_Os01g69830 // LOC_Os12g31430 // LOC_Os04g33420 // LOC_Os10g17770 // LOC_Os01g40670 // LOC_Os04g21580 // LOC_Os03g54170 // LOC_Os11g40030 // LOC_Os06g10820 // LOC_Os09g07640 // LOC_Os03g07540 // LOC_Os02g58090 // LOC_Os07g36130 // LOC_Os06g15570 // LOC_Os02g49840 // LOC_Os02g11780 // LOC_Os03g07930 // …
GO:0030312	C	external encapsulating structure	12	2811	107	24075	0.6	1	// LOC_Os07g33790 // LOC_Os07g41360 // LOC_Os06g48200 // LOC_Os04g53950 // LOC_Os06g06130 // LOC_Os10g02770 // LOC_Os02g02540 // LOC_Os04g51310 // LOC_Os07g47830 // LOC_Os06g48650 // LOC_Os06g09130 // LOC_Os01g44340
GO:0043228	C	non-membrane-bounded organelle	86	2811	1494	24075	1	1	// LOC_Os09g07380 // LOC_Os05g18750 // LOC_Os09g27370 // LOC_Os11g11390 // LOC_Os05g51790 // LOC_Os10g17770 // LOC_Os01g40670 // LOC_Os04g21580 // LOC_Os06g51530 // LOC_Os09g10770 // LOC_Os06g46930 // LOC_Os01g51020 // LOC_Os07g36130 // LOC_Os06g15570 // LOC_Os04g57140 // LOC_Os03g07290 // LOC_Os01g67250 // LOC_Os02g18380 // LOC_Os12g34510 // LOC_Os04g42330 // LOC_Os03g53660 // LOC_Os02g15610 // …
GO:0009536	C	plastid	6	2811	37	24075	0.29	1	// LOC_Os09g24530 // LOC_Os07g34640 // LOC_Os09g04790 // LOC_Os02g49326 // LOC_Os07g28790 // LOC_Os05g50550
GO:0005618	C	cell wall	7	2811	82	24075	0.83	1	// LOC_Os07g41360 // LOC_Os04g53950 // LOC_Os06g48200 // LOC_Os10g02770 // LOC_Os07g47830 // LOC_Os06g48650 // LOC_Os01g44340
GO:0005576	C	extracellular region	14	2811	251	24075	1	1	// LOC_Os02g50730 // LOC_Os06g41700 // LOC_Os04g22330 // LOC_Os11g33110 // LOC_Os03g06000 // LOC_Os04g53950 // LOC_Os11g01730 // LOC_Os06g48200 // LOC_Os03g12990 // LOC_Os10g02770 // LOC_Os03g06050 // LOC_Os01g72290 // LOC_Os04g22220 // LOC_Os11g05190
// LOC_Os05g48870 // LOC_Os11g36160 // LOC_Os03g18740 // LOC_Os09g31498 // LOC_Os11g44960 // LOC_Os09g31490 // LOC_Os12g13380 // LOC_Os09g30380 // LOC_Os06g14260 // LOC_Os12g07730 // LOC_Os08g41630 // LOC_Os08g14230 // LOC_Os09g37890 // LOC_Os03g13600 // LOC_Os03g33650 // LOC_Os06g01480 // LOC_Os02g55320 // LOC_Os03g53880 // LOC_Os07g04690 // LOC_Os02g50550 // LOC_Os06g23800 // LOC_Os06g43210 // …

## Sheet: Yellow_GO
GO_acc	term_type	Term	queryitem	querytotal	bgitem	bgtotal	pvalue	FDR	entries
GO:0006412	P	translation	140	1496	595	24075	2.8e-36	5.3e-34	// LOC_Os01g39010 // LOC_Os04g42380 // LOC_Os01g22490 // LOC_Os08g23110 // LOC_Os09g34010 // LOC_Os08g13690 // LOC_Os01g64090 // LOC_Os08g19850 // LOC_Os01g49900 // LOC_Os11g34210 // LOC_Os05g27940 // LOC_Os06g03790 // LOC_Os12g03880 // LOC_Os03g51510 // LOC_Os08g42920 // LOC_Os02g16670 // LOC_Os01g66379 // LOC_Os05g48510 // LOC_Os07g33997 // LOC_Os02g18550 // LOC_Os08g44450 // LOC_Os03g21550 // …
GO:0010467	P	gene expression	310	1496	2424	24075	6e-32	5.8e-30	// LOC_Os07g48450 // LOC_Os10g36210 // LOC_Os01g39010 // LOC_Os10g01570 // LOC_Os04g42380 // LOC_Os01g22490 // LOC_Os12g07350 // LOC_Os08g23110 // LOC_Os01g45570 // LOC_Os05g25960 // LOC_Os02g34840 // LOC_Os01g73890 // LOC_Os02g01332 // LOC_Os10g05220 // LOC_Os12g21500 // LOC_Os05g13770 // LOC_Os04g42010 // LOC_Os08g13690 // LOC_Os01g54890 // LOC_Os04g27960 // LOC_Os03g21240 // LOC_Os06g08800 // …
GO:0044267	P	cellular protein metabolic process	294	1496	2877	24075	1.3e-16	8.3e-15	// LOC_Os09g19560 // LOC_Os05g09490 // LOC_Os11g30410 // LOC_Os09g36670 // LOC_Os03g17300 // LOC_Os04g42380 // LOC_Os01g22490 // LOC_Os08g23110 // LOC_Os01g53020 // LOC_Os01g39010 // LOC_Os02g10100 // LOC_Os10g28640 // LOC_Os02g46650 // LOC_Os04g36890 // LOC_Os05g13770 // LOC_Os03g29260 // LOC_Os01g16890 // LOC_Os09g33930 // LOC_Os02g48910 // LOC_Os06g11320 // LOC_Os06g45630 // LOC_Os06g09330 // …
GO:0006519	P	cellular amino acid and derivative metabolic process	74	1496	391	24075	3.7e-15	1.8e-13	// LOC_Os10g22380 // LOC_Os03g55150 // LOC_Os04g57400 // LOC_Os01g54020 // LOC_Os10g10244 // LOC_Os08g23110 // LOC_Os07g30200 // LOC_Os01g13190 // LOC_Os09g21110 // LOC_Os04g58400 // LOC_Os03g10190 // LOC_Os01g71990 // LOC_Os07g38390 // LOC_Os01g27520 // LOC_Os12g34860 // LOC_Os07g39690 // LOC_Os10g26130 // LOC_Os07g25590 // LOC_Os01g12560 // LOC_Os07g47860 // LOC_Os03g12290 // LOC_Os03g11120 // …
GO:0019538	P	protein metabolic process	340	1496	4333	24075	4.4e-06	0.00017	// LOC_Os09g19560 // LOC_Os05g09490 // LOC_Os11g30410 // LOC_Os09g36670 // LOC_Os03g17300 // LOC_Os04g42380 // LOC_Os01g22490 // LOC_Os10g10244 // LOC_Os08g23110 // LOC_Os01g53020 // LOC_Os01g39010 // LOC_Os02g10100 // LOC_Os10g28640 // LOC_Os02g46650 // LOC_Os04g36890 // LOC_Os05g13770 // LOC_Os03g29260 // LOC_Os01g16890 // LOC_Os09g33930 // LOC_Os02g48910 // LOC_Os06g11320 // LOC_Os06g45630 // …
GO:0009056	P	catabolic process	49	1496	433	24075	0.00013	0.004	// LOC_Os05g09490 // LOC_Os04g48770 // LOC_Os08g34050 // LOC_Os06g04800 // LOC_Os08g41620 // LOC_Os05g10580 // LOC_Os03g46910 // LOC_Os02g43760 // LOC_Os10g33800 // LOC_Os02g08300 // LOC_Os04g55000 // LOC_Os09g32800 // LOC_Os10g30200 // LOC_Os01g05120 // LOC_Os11g38630 // LOC_Os06g07630 // LOC_Os02g40460 // LOC_Os03g01660 // LOC_Os09g36830 // LOC_Os01g03300 // LOC_Os01g27160 // LOC_Os05g41180 // …
GO:0007049	P	cell cycle	8	1496	30	24075	0.0014	0.037	// LOC_Os06g07480 // LOC_Os05g50360 // LOC_Os11g28350 // LOC_Os08g06600 // LOC_Os07g46540 // LOC_Os02g40680 // LOC_Os03g05300 // LOC_Os03g13850
GO:0016265	P	death	20	1496	544	24075	1	1	// LOC_Os12g17430 // LOC_Os06g17920 // LOC_Os06g40790 // LOC_Os10g04060 // LOC_Os11g11550 // LOC_Os11g28950 // LOC_Os01g72680 // LOC_Os02g48780 // LOC_Os08g16120 // LOC_Os11g37774 // LOC_Os08g07950 // LOC_Os08g07940 // LOC_Os07g04900 // LOC_Os04g30530 // LOC_Os11g45180 // LOC_Os11g45050 // LOC_Os09g14490 // LOC_Os11g12000 // LOC_Os11g03650 // LOC_Os02g20210
GO:0019222	P	regulation of metabolic process	107	1496	1664	24075	0.38	1	// LOC_Os07g48450 // LOC_Os10g01570 // LOC_Os12g37415 // LOC_Os01g45570 // LOC_Os05g25960 // LOC_Os02g34840 // LOC_Os02g56130 // LOC_Os04g27960 // LOC_Os03g21240 // LOC_Os06g09330 // LOC_Os09g12310 // LOC_Os03g55990 // LOC_Os12g29330 // LOC_Os01g63160 // LOC_Os07g41580 // LOC_Os01g57890 // LOC_Os06g17410 // LOC_Os08g38990 // LOC_Os08g27220 // LOC_Os06g06740 // LOC_Os01g12860 // LOC_Os09g15320 // …
GO:0042592	P	homeostatic process	14	1496	147	24075	0.09	1	// LOC_Os07g09310 // LOC_Os03g14520 // LOC_Os05g06430 // LOC_Os01g23740 // LOC_Os02g06480 // LOC_Os06g44910 // LOC_Os11g09280 // LOC_Os06g06790 // LOC_Os10g34170 // LOC_Os11g39140 // LOC_Os04g17050 // LOC_Os05g10930 // LOC_Os05g06460 // LOC_Os03g17860
GO:0044249	P	cellular biosynthetic process	362	1496	5890	24075	0.6	1	// LOC_Os04g42380 // LOC_Os02g34840 // LOC_Os05g13770 // LOC_Os07g38390 // LOC_Os05g01560 // LOC_Os01g49900 // LOC_Os07g07060 // LOC_Os05g43576 // LOC_Os04g16740 // LOC_Os07g41580 // LOC_Os02g16670 // LOC_Os05g38150 // LOC_Os01g66379 // LOC_Os06g17410 // LOC_Os12g37400 // LOC_Os03g45320 // LOC_Os01g37837 // LOC_Os08g12840 // LOC_Os01g49010 // LOC_Os01g23630 // LOC_Os03g03650 // LOC_Os07g09740 // …
GO:0006807	P	nitrogen compound metabolic process	374	1496	7073	24075	1	1	// LOC_Os12g07350 // LOC_Os02g34840 // LOC_Os12g21500 // LOC_Os05g13770 // LOC_Os04g42010 // LOC_Os05g01560 // LOC_Os07g07060 // LOC_Os04g37500 // LOC_Os04g16740 // LOC_Os07g41580 // LOC_Os02g16670 // LOC_Os05g38150 // LOC_Os06g17410 // LOC_Os12g37400 // LOC_Os01g09750 // LOC_Os02g37920 // LOC_Os03g45320 // LOC_Os01g37837 // LOC_Os05g22260 // LOC_Os01g49010 // LOC_Os01g23630 // LOC_Os03g03650 // …
GO:0007165	P	signal transduction	14	1496	240	24075	0.63	1	// LOC_Os01g53660 // LOC_Os10g42940 // LOC_Os04g30880 // LOC_Os03g60870 // LOC_Os01g23620 // LOC_Os07g13530 // LOC_Os12g37560 // LOC_Os01g16030 // LOC_Os07g37650 // LOC_Os12g04290 // LOC_Os05g49890 // LOC_Os08g15040 // LOC_Os05g46000 // LOC_Os06g39875
GO:0034645	P	cellular macromolecule biosynthetic process	290	1496	5248	24075	0.99	1	// LOC_Os07g48450 // LOC_Os01g39010 // LOC_Os01g63160 // LOC_Os04g42380 // LOC_Os01g22490 // LOC_Os08g23110 // LOC_Os01g45570 // LOC_Os05g25960 // LOC_Os02g34840 // LOC_Os07g08630 // LOC_Os02g01332 // LOC_Os02g49180 // LOC_Os02g56130 // LOC_Os05g13770 // LOC_Os01g35450 // LOC_Os08g13690 // LOC_Os09g33930 // LOC_Os01g54890 // LOC_Os12g07720 // LOC_Os04g27960 // LOC_Os03g21240 // LOC_Os04g41040 // …
GO:0008219	P	cell death	20	1496	544	24075	1	1	// LOC_Os12g17430 // LOC_Os06g17920 // LOC_Os06g40790 // LOC_Os10g04060 // LOC_Os11g11550 // LOC_Os11g28950 // LOC_Os01g72680 // LOC_Os02g48780 // LOC_Os08g16120 // LOC_Os11g37774 // LOC_Os08g07950 // LOC_Os08g07940 // LOC_Os07g04900 // LOC_Os04g30530 // LOC_Os11g45180 // LOC_Os11g45050 // LOC_Os09g14490 // LOC_Os11g12000 // LOC_Os11g03650 // LOC_Os02g20210
GO:0050789	P	regulation of biological process	137	1496	2027	24075	0.17	1	// LOC_Os07g48450 // LOC_Os10g01570 // LOC_Os12g37415 // LOC_Os01g45570 // LOC_Os05g25960 // LOC_Os02g34840 // LOC_Os11g09280 // LOC_Os02g56130 // LOC_Os04g27960 // LOC_Os03g21240 // LOC_Os06g09330 // LOC_Os09g12310 // LOC_Os06g44910 // LOC_Os03g55990 // LOC_Os12g29330 // LOC_Os01g63160 // LOC_Os07g41580 // LOC_Os01g57890 // LOC_Os06g17410 // LOC_Os01g23620 // LOC_Os08g38990 // LOC_Os08g27220 // …
GO:0044260	P	cellular macromolecule metabolic process	558	1496	9350	24075	0.89	1	// LOC_Os04g42380 // LOC_Os12g07350 // LOC_Os02g34840 // LOC_Os02g10100 // LOC_Os12g21500 // LOC_Os05g13770 // LOC_Os04g42010 // LOC_Os06g45630 // LOC_Os01g49900 // LOC_Os06g37620 // LOC_Os03g10950 // LOC_Os07g41580 // LOC_Os09g01670 // LOC_Os02g16670 // LOC_Os01g66379 // LOC_Os06g17410 // LOC_Os12g37400 // LOC_Os01g09750 // LOC_Os01g39010 // LOC_Os09g15320 // LOC_Os02g38710 // LOC_Os02g37920 // …
GO:0016043	P	cellular component organization	47	1496	1240	24075	1	1	// LOC_Os06g06510 // LOC_Os08g06600 // LOC_Os07g46540 // LOC_Os01g73890 // LOC_Os12g31450 // LOC_Os07g43360 // LOC_Os06g05660 // LOC_Os01g62230 // LOC_Os11g35360 // LOC_Os02g55970 // LOC_Os12g03270 // LOC_Os05g50360 // LOC_Os01g65850 // LOC_Os11g05730 // LOC_Os06g48630 // LOC_Os09g17850 // LOC_Os05g31020 // LOC_Os03g29864 // LOC_Os01g27040 // LOC_Os01g51450 // LOC_Os11g37100 // LOC_Os07g42150 // …
GO:0065007	P	biological regulation	145	1496	2125	24075	0.14	1	// LOC_Os07g48450 // LOC_Os10g01570 // LOC_Os12g37415 // LOC_Os01g45570 // LOC_Os05g25960 // LOC_Os02g34840 // LOC_Os11g09280 // LOC_Os01g01510 // LOC_Os04g27960 // LOC_Os03g21240 // LOC_Os06g09330 // LOC_Os09g12310 // LOC_Os06g44910 // LOC_Os03g55990 // LOC_Os12g29330 // LOC_Os01g63160 // LOC_Os07g41580 // LOC_Os01g57890 // LOC_Os02g38320 // LOC_Os06g17410 // LOC_Os01g23620 // LOC_Os08g38990 // …
GO:0065008	P	regulation of biological quality	15	1496	176	24075	0.15	1	// LOC_Os07g09310 // LOC_Os03g14520 // LOC_Os05g06430 // LOC_Os01g23740 // LOC_Os02g06480 // LOC_Os06g44910 // LOC_Os11g09280 // LOC_Os06g06790 // LOC_Os10g34170 // LOC_Os11g39140 // LOC_Os04g17050 // LOC_Os05g10930 // LOC_Os05g06460 // LOC_Os03g17860 // LOC_Os11g35360
GO:0010468	P	regulation of gene expression	95	1496	1577	24075	0.64	1	// LOC_Os07g48450 // LOC_Os10g01570 // LOC_Os12g37415 // LOC_Os01g45570 // LOC_Os05g25960 // LOC_Os02g34840 // LOC_Os01g01510 // LOC_Os04g27960 // LOC_Os03g21240 // LOC_Os03g55990 // LOC_Os12g29330 // LOC_Os01g63160 // LOC_Os07g41580 // LOC_Os01g57890 // LOC_Os06g17410 // LOC_Os08g38990 // LOC_Os08g27220 // LOC_Os06g06740 // LOC_Os01g12860 // LOC_Os03g39432 // LOC_Os07g08500 // LOC_Os06g09420 // …
GO:0019725	P	cellular homeostasis	14	1496	140	24075	0.068	1	// LOC_Os07g09310 // LOC_Os03g14520 // LOC_Os05g06430 // LOC_Os01g23740 // LOC_Os02g06480 // LOC_Os06g44910 // LOC_Os11g09280 // LOC_Os06g06790 // LOC_Os10g34170 // LOC_Os11g39140 // LOC_Os04g17050 // LOC_Os05g10930 // LOC_Os05g06460 // LOC_Os03g17860
GO:0009987	P	cellular process	814	1496	12839	24075	0.22	1	// LOC_Os01g63160 // LOC_Os04g42380 // LOC_Os12g07350 // LOC_Os02g34840 // LOC_Os02g10100 // LOC_Os12g21500 // LOC_Os05g13770 // LOC_Os07g38390 // LOC_Os04g42010 // LOC_Os05g01560 // LOC_Os06g45630 // LOC_Os06g46436 // LOC_Os01g49900 // LOC_Os06g37620 // LOC_Os03g10950 // LOC_Os07g48360 // LOC_Os04g37500 // LOC_Os04g16740 // LOC_Os07g41580 // LOC_Os09g01670 // LOC_Os02g16670 // LOC_Os01g53020 // …
GO:0006629	P	lipid metabolic process	27	1496	528	24075	0.86	1	// LOC_Os06g06230 // LOC_Os03g02710 // LOC_Os08g34220 // LOC_Os02g03110 // LOC_Os01g66360 // LOC_Os06g46450 // LOC_Os09g36520 // LOC_Os04g35100 // LOC_Os04g30760 // LOC_Os04g55660 // LOC_Os04g52500 // LOC_Os03g29170 // LOC_Os12g37560 // LOC_Os01g53660 // LOC_Os02g18870 // LOC_Os02g18480 // LOC_Os09g31970 // LOC_Os05g36000 // LOC_Os01g72940 // LOC_Os04g53860 // LOC_Os11g34440 // LOC_Os12g01930 // …
GO:0006139	P	nucleobase, nucleoside, nucleotide and nucleic acid metabolic process	335	1496	6695	24075	1	1	// LOC_Os07g48450 // LOC_Os05g01440 // LOC_Os10g01570 // LOC_Os12g07350 // LOC_Os08g23110 // LOC_Os01g45570 // LOC_Os05g25960 // LOC_Os02g03050 // LOC_Os01g73890 // LOC_Os07g44630 // LOC_Os12g21500 // LOC_Os05g13770 // LOC_Os03g27040 // LOC_Os04g42010 // LOC_Os05g49700 // LOC_Os01g25880 // LOC_Os01g54890 // LOC_Os05g01560 // LOC_Os12g39860 // LOC_Os04g27960 // LOC_Os03g29864 // LOC_Os06g08800 // …
GO:0060255	P	regulation of macromolecule metabolic process	107	1496	1640	24075	0.32	1	// LOC_Os07g48450 // LOC_Os10g01570 // LOC_Os12g37415 // LOC_Os01g45570 // LOC_Os05g25960 // LOC_Os02g34840 // LOC_Os02g56130 // LOC_Os04g27960 // LOC_Os03g21240 // LOC_Os06g09330 // LOC_Os09g12310 // LOC_Os03g55990 // LOC_Os12g29330 // LOC_Os01g63160 // LOC_Os07g41580 // LOC_Os01g57890 // LOC_Os06g17410 // LOC_Os08g38990 // LOC_Os08g27220 // LOC_Os06g06740 // LOC_Os01g12860 // LOC_Os09g15320 // …
GO:0006810	P	transport	89	1496	1638	24075	0.91	1	// LOC_Os12g31640 // LOC_Os02g47090 // LOC_Os01g33020 // LOC_Os07g22700 // LOC_Os05g01560 // LOC_Os03g27040 // LOC_Os07g39400 // LOC_Os09g12600 // LOC_Os06g48630 // LOC_Os01g66560 // LOC_Os07g43040 // LOC_Os03g16080 // LOC_Os09g19734 // LOC_Os04g16740 // LOC_Os05g33960 // LOC_Os09g32200 // LOC_Os01g23620 // LOC_Os08g15040 // LOC_Os02g06480 // LOC_Os01g16910 // LOC_Os07g12890 // LOC_Os08g42380 // …
GO:0006464	P	protein modification process	93	1496	1929	24075	1	1	// LOC_Os09g19560 // LOC_Os11g30410 // LOC_Os02g10100 // LOC_Os10g28640 // LOC_Os05g13770 // LOC_Os06g45630 // LOC_Os01g06280 // LOC_Os06g09330 // LOC_Os09g12310 // LOC_Os04g47570 // LOC_Os01g03300 // LOC_Os06g37620 // LOC_Os03g10950 // LOC_Os01g27020 // LOC_Os01g67160 // LOC_Os03g02680 // LOC_Os04g41310 // LOC_Os09g15320 // LOC_Os02g38710 // LOC_Os11g34750 // LOC_Os08g08140 // LOC_Os03g62314 // …
GO:0050794	P	regulation of cellular process	123	1496	1955	24075	0.46	1	// LOC_Os07g48450 // LOC_Os12g37415 // LOC_Os01g45570 // LOC_Os05g25960 // LOC_Os02g34840 // LOC_Os11g09280 // LOC_Os02g56130 // LOC_Os04g27960 // LOC_Os03g21240 // LOC_Os06g44910 // LOC_Os03g55990 // LOC_Os12g29330 // LOC_Os01g63160 // LOC_Os07g41580 // LOC_Os01g57890 // LOC_Os06g17410 // LOC_Os01g23620 // LOC_Os08g38990 // LOC_Os08g27220 // LOC_Os12g37560 // LOC_Os06g06740 // LOC_Os01g12860 // …
GO:0009058	P	biosynthetic process	380	1496	6085	24075	0.47	1	// LOC_Os04g42380 // LOC_Os02g34840 // LOC_Os05g13770 // LOC_Os07g38390 // LOC_Os05g01560 // LOC_Os01g49900 // LOC_Os07g07060 // LOC_Os07g48360 // LOC_Os06g23160 // LOC_Os04g16740 // LOC_Os07g41580 // LOC_Os02g16670 // LOC_Os05g38150 // LOC_Os02g56740 // LOC_Os06g17410 // LOC_Os12g37400 // LOC_Os03g45320 // LOC_Os01g37837 // LOC_Os08g12840 // LOC_Os01g49010 // LOC_Os01g23630 // LOC_Os03g03650 // …
GO:0006950	P	response to stress	55	1496	873	24075	0.48	1	// LOC_Os10g08580 // LOC_Os10g04060 // LOC_Os03g03810 // LOC_Os04g35420 // LOC_Os01g58680 // LOC_Os03g18850 // LOC_Os04g30530 // LOC_Os08g07940 // LOC_Os02g08300 // LOC_Os12g31370 // LOC_Os08g16120 // LOC_Os12g18200 // LOC_Os08g33340 // LOC_Os06g37620 // LOC_Os03g63920 // LOC_Os03g13850 // LOC_Os12g07060 // LOC_Os11g28950 // LOC_Os12g07830 // LOC_Os05g19270 // LOC_Os11g11550 // LOC_Os12g36850 // …
GO:0009059	P	macromolecule biosynthetic process	291	1496	5252	24075	0.99	1	// LOC_Os07g48450 // LOC_Os01g39010 // LOC_Os01g63160 // LOC_Os04g42380 // LOC_Os01g22490 // LOC_Os08g23110 // LOC_Os01g45570 // LOC_Os05g25960 // LOC_Os02g34840 // LOC_Os07g08630 // LOC_Os02g01332 // LOC_Os02g49180 // LOC_Os02g56130 // LOC_Os05g13770 // LOC_Os01g35450 // LOC_Os08g13690 // LOC_Os09g33930 // LOC_Os01g54890 // LOC_Os12g07720 // LOC_Os04g27960 // LOC_Os03g21240 // LOC_Os04g41040 // …
GO:0008152	P	metabolic process	847	1496	14398	24075	0.99	1	// LOC_Os01g63160 // LOC_Os04g42380 // LOC_Os12g34874 // LOC_Os12g07350 // LOC_Os02g34840 // LOC_Os02g10100 // LOC_Os12g21500 // LOC_Os02g57040 // LOC_Os05g13770 // LOC_Os07g38390 // LOC_Os04g42010 // LOC_Os05g01560 // LOC_Os06g45630 // LOC_Os06g46436 // LOC_Os01g49900 // LOC_Os06g37620 // LOC_Os06g37330 // LOC_Os03g10950 // LOC_Os07g48360 // LOC_Os06g23160 // LOC_Os04g37500 // LOC_Os04g16740 // …
GO:0051234	P	establishment of localization	89	1496	1638	24075	0.91	1	// LOC_Os12g31640 // LOC_Os02g47090 // LOC_Os01g33020 // LOC_Os07g22700 // LOC_Os05g01560 // LOC_Os03g27040 // LOC_Os07g39400 // LOC_Os09g12600 // LOC_Os06g48630 // LOC_Os01g66560 // LOC_Os07g43040 // LOC_Os03g16080 // LOC_Os09g19734 // LOC_Os04g16740 // LOC_Os05g33960 // LOC_Os09g32200 // LOC_Os01g23620 // LOC_Os08g15040 // LOC_Os02g06480 // LOC_Os01g16910 // LOC_Os07g12890 // LOC_Os08g42380 // …
GO:0051179	P	localization	91	1496	1651	24075	0.89	1	// LOC_Os12g31640 // LOC_Os02g47090 // LOC_Os01g33020 // LOC_Os07g22700 // LOC_Os05g01560 // LOC_Os03g27040 // LOC_Os07g39400 // LOC_Os09g12600 // LOC_Os06g48630 // LOC_Os01g66560 // LOC_Os07g43040 // LOC_Os03g16080 // LOC_Os09g19734 // LOC_Os04g16740 // LOC_Os05g33960 // LOC_Os09g32200 // LOC_Os01g23620 // LOC_Os02g06480 // LOC_Os01g16910 // LOC_Os07g12890 // LOC_Os08g42380 // LOC_Os12g34108 // …
GO:0006091	P	generation of precursor metabolites and energy	13	1496	243	24075	0.74	1	// LOC_Os12g05110 // LOC_Os06g46436 // LOC_Os06g22060 // LOC_Os02g48360 // LOC_Os10g26570 // LOC_Os03g46910 // LOC_Os04g02900 // LOC_Os10g33800 // LOC_Os11g06340 // LOC_Os04g16740 // LOC_Os08g34050 // LOC_Os05g01560 // LOC_Os12g34108
GO:0044238	P	primary metabolic process	725	1496	11969	24075	0.83	1	// LOC_Os04g42380 // LOC_Os12g07350 // LOC_Os02g34840 // LOC_Os02g10100 // LOC_Os12g21500 // LOC_Os05g13770 // LOC_Os07g38390 // LOC_Os04g42010 // LOC_Os05g01560 // LOC_Os06g45630 // LOC_Os01g49900 // LOC_Os06g37620 // LOC_Os03g10950 // LOC_Os04g37500 // LOC_Os04g16740 // LOC_Os04g55660 // LOC_Os07g41580 // LOC_Os09g01670 // LOC_Os02g16670 // LOC_Os01g53020 // LOC_Os05g38150 // LOC_Os01g66379 // …
GO:0005975	P	carbohydrate metabolic process	38	1496	833	24075	0.98	1	// LOC_Os08g41410 // LOC_Os07g10830 // LOC_Os08g34050 // LOC_Os03g46910 // LOC_Os10g33800 // LOC_Os02g44235 // LOC_Os01g34920 // LOC_Os02g44230 // LOC_Os04g57860 // LOC_Os11g03900 // LOC_Os02g38840 // LOC_Os01g63840 // LOC_Os04g40950 // LOC_Os12g03720 // LOC_Os01g63970 // LOC_Os01g71680 // LOC_Os02g54030 // LOC_Os12g03480 // LOC_Os06g42310 // LOC_Os12g05110 // LOC_Os01g16310 // LOC_Os07g44660 // …
GO:0050896	P	response to stimulus	60	1496	1026	24075	0.7	1	// LOC_Os10g08580 // LOC_Os10g04060 // LOC_Os03g03810 // LOC_Os04g35420 // LOC_Os01g58680 // LOC_Os03g18850 // LOC_Os04g30530 // LOC_Os08g07940 // LOC_Os02g08300 // LOC_Os12g31370 // LOC_Os08g16120 // LOC_Os12g18200 // LOC_Os08g33340 // LOC_Os06g37620 // LOC_Os03g63920 // LOC_Os12g36850 // LOC_Os12g07060 // LOC_Os11g28950 // LOC_Os12g07830 // LOC_Os05g19270 // LOC_Os11g11550 // LOC_Os01g12210 // …
GO:0043412	P	macromolecule modification	119	1496	1979	24075	0.66	1	// LOC_Os09g19560 // LOC_Os11g30410 // LOC_Os10g01570 // LOC_Os02g10100 // LOC_Os10g28640 // LOC_Os05g13770 // LOC_Os06g45630 // LOC_Os06g08800 // LOC_Os06g09330 // LOC_Os09g12310 // LOC_Os04g47570 // LOC_Os01g03300 // LOC_Os06g37620 // LOC_Os03g10950 // LOC_Os01g27020 // LOC_Os01g67160 // LOC_Os03g02680 // LOC_Os01g06280 // LOC_Os09g15320 // LOC_Os02g38710 // LOC_Os04g47380 // LOC_Os11g34750 // …
GO:0044237	P	cellular metabolic process	669	1496	10696	24075	0.42	1	// LOC_Os04g42380 // LOC_Os12g07350 // LOC_Os02g34840 // LOC_Os02g10100 // LOC_Os12g21500 // LOC_Os05g13770 // LOC_Os07g38390 // LOC_Os04g42010 // LOC_Os05g01560 // LOC_Os06g45630 // LOC_Os06g46436 // LOC_Os01g49900 // LOC_Os06g37620 // LOC_Os03g10950 // LOC_Os07g48360 // LOC_Os04g37500 // LOC_Os04g16740 // LOC_Os07g41580 // LOC_Os09g01670 // LOC_Os02g16670 // LOC_Os01g53020 // LOC_Os05g38150 // …
GO:0043170	P	macromolecule metabolic process	605	1496	10433	24075	0.99	1	// LOC_Os04g42380 // LOC_Os12g07350 // LOC_Os02g34840 // LOC_Os02g10100 // LOC_Os12g21500 // LOC_Os05g13770 // LOC_Os04g42010 // LOC_Os06g45630 // LOC_Os01g49900 // LOC_Os06g37620 // LOC_Os03g10950 // LOC_Os07g41580 // LOC_Os09g01670 // LOC_Os02g16670 // LOC_Os01g66379 // LOC_Os06g17410 // LOC_Os12g37400 // LOC_Os01g09750 // LOC_Os01g39010 // LOC_Os09g15320 // LOC_Os02g38710 // LOC_Os02g37920 // …
GO:0006350	P	transcription	104	1496	1629	24075	0.41	1	// LOC_Os07g48450 // LOC_Os12g37415 // LOC_Os01g45570 // LOC_Os05g25960 // LOC_Os02g34840 // LOC_Os02g49180 // LOC_Os12g09280 // LOC_Os05g13770 // LOC_Os04g27960 // LOC_Os03g21240 // LOC_Os09g07120 // LOC_Os03g55990 // LOC_Os12g29330 // LOC_Os01g63160 // LOC_Os07g41580 // LOC_Os01g57890 // LOC_Os06g17410 // LOC_Os08g38990 // LOC_Os08g27220 // LOC_Os01g73890 // LOC_Os06g06740 // LOC_Os01g12860 // …
GO:0006259	P	DNA metabolic process	82	1496	4515	24075	1	1	// LOC_Os10g08580 // LOC_Os10g01570 // LOC_Os12g07720 // LOC_Os04g35420 // LOC_Os12g13950 // LOC_Os01g64820 // LOC_Os03g03650 // LOC_Os12g05310 // LOC_Os11g08330 // LOC_Os02g56130 // LOC_Os07g22400 // LOC_Os02g08300 // LOC_Os12g31370 // LOC_Os02g13910 // LOC_Os07g45620 // LOC_Os12g18200 // LOC_Os02g53500 // LOC_Os01g49010 // LOC_Os11g29380 // LOC_Os03g29864 // LOC_Os08g07840 // LOC_Os03g63920 // …
GO:0017111	F	nucleoside-triphosphatase activity	116	1496	726	24075	4.7e-18	5.2e-16	// LOC_Os12g07880 // LOC_Os03g58810 // LOC_Os04g28060 // LOC_Os07g08170 // LOC_Os04g43140 // LOC_Os09g34010 // LOC_Os02g47760 // LOC_Os04g28260 // LOC_Os03g27040 // LOC_Os04g40970 // LOC_Os10g30580 // LOC_Os04g30720 // LOC_Os01g53900 // LOC_Os05g38850 // LOC_Os03g21530 // LOC_Os06g45980 // LOC_Os05g38480 // LOC_Os05g01990 // LOC_Os02g57980 // LOC_Os06g39875 // LOC_Os07g33340 // LOC_Os06g39870 // …
GO:0016462	F	pyrophosphatase activity	116	1496	743	24075	2.2e-17	1.2e-15	// LOC_Os12g07880 // LOC_Os03g58810 // LOC_Os04g28060 // LOC_Os07g08170 // LOC_Os04g43140 // LOC_Os09g34010 // LOC_Os02g47760 // LOC_Os04g28260 // LOC_Os03g27040 // LOC_Os04g40970 // LOC_Os10g30580 // LOC_Os04g30720 // LOC_Os01g53900 // LOC_Os05g38850 // LOC_Os03g21530 // LOC_Os06g45980 // LOC_Os05g38480 // LOC_Os05g01990 // LOC_Os02g57980 // LOC_Os06g39875 // LOC_Os07g33340 // LOC_Os06g39870 // …
GO:0016818	F	hydrolase activity, acting on acid anhydrides, in phosphorus-containing anhydrides	116	1496	759	24075	8.8e-17	3.2e-15	// LOC_Os12g07880 // LOC_Os03g58810 // LOC_Os04g28060 // LOC_Os07g08170 // LOC_Os04g43140 // LOC_Os09g34010 // LOC_Os02g47760 // LOC_Os04g28260 // LOC_Os03g27040 // LOC_Os04g40970 // LOC_Os10g30580 // LOC_Os04g30720 // LOC_Os01g53900 // LOC_Os05g38850 // LOC_Os03g21530 // LOC_Os06g45980 // LOC_Os05g38480 // LOC_Os05g01990 // LOC_Os02g57980 // LOC_Os06g39875 // LOC_Os07g33340 // LOC_Os06g39870 // …
GO:0016817	F	hydrolase activity, acting on acid anhydrides	116	1496	764	24075	1.3e-16	3.7e-15	// LOC_Os12g07880 // LOC_Os03g58810 // LOC_Os04g28060 // LOC_Os07g08170 // LOC_Os04g43140 // LOC_Os09g34010 // LOC_Os02g47760 // LOC_Os04g28260 // LOC_Os03g27040 // LOC_Os04g40970 // LOC_Os10g30580 // LOC_Os04g30720 // LOC_Os01g53900 // LOC_Os05g38850 // LOC_Os03g21530 // LOC_Os06g45980 // LOC_Os05g38480 // LOC_Os05g01990 // LOC_Os02g57980 // LOC_Os06g39875 // LOC_Os07g33340 // LOC_Os06g39870 // …
GO:0000166	F	nucleotide binding	367	1496	3874	24075	3.5e-16	7.7e-15	// LOC_Os12g34874 // LOC_Os02g10100 // LOC_Os05g13770 // LOC_Os04g42010 // LOC_Os04g02870 // LOC_Os09g35850 // LOC_Os06g45630 // LOC_Os10g30580 // LOC_Os06g37620 // LOC_Os07g07060 // LOC_Os01g64820 // LOC_Os04g16740 // LOC_Os02g16670 // LOC_Os09g29980 // LOC_Os12g37400 // LOC_Os08g07950 // LOC_Os02g47760 // LOC_Os09g15320 // LOC_Os07g33340 // LOC_Os02g37920 // LOC_Os11g34750 // LOC_Os01g08930 // …
GO:0005198	F	structural molecule activity	78	1496	462	24075	1.4e-13	2.5e-12	// LOC_Os01g01060 // LOC_Os09g08890 // LOC_Os01g47660 // LOC_Os05g11710 // LOC_Os04g42380 // LOC_Os01g22490 // LOC_Os03g40180 // LOC_Os04g28180 // LOC_Os03g58050 // LOC_Os01g67134 // LOC_Os02g01332 // LOC_Os01g62210 // LOC_Os08g02400 // LOC_Os01g24690 // LOC_Os03g27260 // LOC_Os08g13690 // LOC_Os02g01560 // LOC_Os11g04070 // LOC_Os01g59950 // LOC_Os03g54890 // LOC_Os04g51630 // LOC_Os09g31019 // …
GO:0008135	F	translation factor activity, nucleic acid binding	21	1496	75	24075	1.3e-07	2e-06	// LOC_Os04g02150 // LOC_Os06g37440 // LOC_Os10g41960 // LOC_Os02g12800 // LOC_Os01g66379 // LOC_Os05g19630 // LOC_Os07g48300 // LOC_Os07g03230 // LOC_Os03g29260 // LOC_Os05g31020 // LOC_Os03g08450 // LOC_Os07g02210 // LOC_Os09g34010 // LOC_Os10g32970 // LOC_Os01g73880 // LOC_Os03g21550 // LOC_Os03g36780 // LOC_Os03g55150 // LOC_Os03g08050 // LOC_Os02g12794 // LOC_Os07g42300
GO:0003774	F	motor activity	10	1496	69	24075	0.017	0.23	// LOC_Os03g53920 // LOC_Os01g43360 // LOC_Os04g30720 // LOC_Os01g33040 // LOC_Os07g01490 // LOC_Os03g17164 // LOC_Os05g38480 // LOC_Os02g28850 // LOC_Os02g56540 // LOC_Os04g28260
GO:0004871	F	signal transducer activity	5	1496	152	24075	0.96	1	// LOC_Os06g09090 // LOC_Os06g08910 // LOC_Os02g54640 // LOC_Os02g38120 // LOC_Os10g07546
GO:0003676	F	nucleic acid binding	414	1496	8251	24075	1	1	// LOC_Os12g07350 // LOC_Os01g47600 // LOC_Os02g34840 // LOC_Os12g21500 // LOC_Os04g42010 // LOC_Os04g02870 // LOC_Os09g35850 // LOC_Os11g36790 // LOC_Os01g64820 // LOC_Os07g41580 // LOC_Os01g74030 // LOC_Os09g29980 // LOC_Os01g66379 // LOC_Os06g17410 // LOC_Os12g37400 // LOC_Os01g09750 // LOC_Os02g49180 // LOC_Os07g33340 // LOC_Os02g37920 // LOC_Os01g08930 // LOC_Os03g61560 // LOC_Os02g45040 // …
GO:0030246	F	carbohydrate binding	10	1496	219	24075	0.87	1	// LOC_Os01g63840 // LOC_Os04g57860 // LOC_Os11g03900 // LOC_Os02g08030 // LOC_Os08g08140 // LOC_Os02g52850 // LOC_Os12g03720 // LOC_Os10g18400 // LOC_Os01g34920 // LOC_Os06g42310
GO:0003677	F	DNA binding	175	1496	5059	24075	1	1	// LOC_Os07g48450 // LOC_Os10g01570 // LOC_Os12g37415 // LOC_Os01g47600 // LOC_Os05g25960 // LOC_Os02g34840 // LOC_Os02g49180 // LOC_Os02g56130 // LOC_Os06g06510 // LOC_Os04g27960 // LOC_Os03g21240 // LOC_Os09g07120 // LOC_Os12g42970 // LOC_Os05g50640 // LOC_Os08g39980 // LOC_Os11g29380 // LOC_Os05g38850 // LOC_Os03g55990 // LOC_Os12g29330 // LOC_Os01g64820 // LOC_Os01g63910 // LOC_Os07g41580 // …
GO:0030528	F	transcription regulator activity	54	1496	987	24075	0.84	1	// LOC_Os09g27140 // LOC_Os04g41820 // LOC_Os01g23630 // LOC_Os08g09320 // LOC_Os03g19900 // LOC_Os02g34840 // LOC_Os01g73890 // LOC_Os01g54890 // LOC_Os02g09650 // LOC_Os08g39830 // LOC_Os08g32085 // LOC_Os06g39960 // LOC_Os09g28354 // LOC_Os03g43810 // LOC_Os01g68420 // LOC_Os10g42430 // LOC_Os03g55990 // LOC_Os07g36460 // LOC_Os12g37415 // LOC_Os12g39290 // LOC_Os10g41230 // LOC_Os02g34830 // …
GO:0016740	F	transferase activity	233	1496	6190	24075	1	1	// LOC_Os09g19560 // LOC_Os04g57400 // LOC_Os12g07350 // LOC_Os01g64820 // LOC_Os02g11940 // LOC_Os02g10100 // LOC_Os10g28640 // LOC_Os07g44630 // LOC_Os12g40830 // LOC_Os05g13770 // LOC_Os03g03650 // LOC_Os01g35450 // LOC_Os08g14770 // LOC_Os01g25880 // LOC_Os06g45630 // LOC_Os12g39860 // LOC_Os06g08800 // LOC_Os04g41040 // LOC_Os04g30760 // LOC_Os07g49290 // LOC_Os01g62900 // LOC_Os08g40170 // …
GO:0003700	F	transcription factor activity	31	1496	651	24075	0.94	1	// LOC_Os06g13670 // LOC_Os12g37415 // LOC_Os08g09320 // LOC_Os03g19900 // LOC_Os01g54890 // LOC_Os02g09650 // LOC_Os08g32085 // LOC_Os06g39960 // LOC_Os04g41820 // LOC_Os01g68420 // LOC_Os03g55990 // LOC_Os10g41230 // LOC_Os09g28354 // LOC_Os01g45570 // LOC_Os01g57890 // LOC_Os04g46060 // LOC_Os05g49700 // LOC_Os06g06540 // LOC_Os03g16430 // LOC_Os12g03290 // LOC_Os08g38990 // LOC_Os08g27220 // …
GO:0016787	F	hydrolase activity	266	1496	4901	24075	0.99	1	// LOC_Os05g09490 // LOC_Os05g12330 // LOC_Os03g58810 // LOC_Os06g08390 // LOC_Os04g28060 // LOC_Os06g33980 // LOC_Os01g47180 // LOC_Os04g43140 // LOC_Os12g21500 // LOC_Os04g49730 // LOC_Os03g63580 // LOC_Os02g53500 // LOC_Os05g39850 // LOC_Os04g28260 // LOC_Os03g27040 // LOC_Os07g44850 // LOC_Os01g49900 // LOC_Os04g40970 // LOC_Os10g30580 // LOC_Os04g30720 // LOC_Os09g19800 // LOC_Os01g53900 // …
GO:0005215	F	transporter activity	48	1496	941	24075	0.93	1	// LOC_Os01g04990 // LOC_Os02g47090 // LOC_Os05g28510 // LOC_Os07g22700 // LOC_Os02g58530 // LOC_Os05g01560 // LOC_Os01g51770 // LOC_Os03g27040 // LOC_Os02g18670 // LOC_Os04g50950 // LOC_Os01g13430 // LOC_Os02g54640 // LOC_Os07g45300 // LOC_Os09g12600 // LOC_Os07g38760 // LOC_Os03g18500 // LOC_Os09g38690 // LOC_Os03g20970 // LOC_Os07g37100 // LOC_Os07g43040 // LOC_Os01g08020 // LOC_Os03g16080 // …
GO:0030234	F	enzyme regulator activity	10	1496	255	24075	0.95	1	// LOC_Os09g37000 // LOC_Os03g05300 // LOC_Os04g30880 // LOC_Os02g56130 // LOC_Os07g37650 // LOC_Os04g49730 // LOC_Os02g05340 // LOC_Os11g13540 // LOC_Os11g11500 // LOC_Os01g57854
GO:0003824	F	catalytic activity	738	1496	12724	24075	1	1	// LOC_Os12g34874 // LOC_Os12g07350 // LOC_Os02g10100 // LOC_Os12g21500 // LOC_Os02g57040 // LOC_Os05g13770 // LOC_Os07g38390 // LOC_Os04g49730 // LOC_Os06g45630 // LOC_Os03g62690 // LOC_Os01g49900 // LOC_Os10g30580 // LOC_Os11g07500 // LOC_Os02g48350 // LOC_Os06g37620 // LOC_Os06g37330 // LOC_Os03g10950 // LOC_Os07g48360 // LOC_Os06g23160 // LOC_Os04g37500 // LOC_Os04g16740 // LOC_Os08g05820 // …
GO:0016788	F	hydrolase activity, acting on ester bonds	71	1496	1949	24075	1	1	// LOC_Os03g62720 // LOC_Os01g41660 // LOC_Os07g45620 // LOC_Os09g07820 // LOC_Os08g41620 // LOC_Os07g46660 // LOC_Os09g36520 // LOC_Os06g33980 // LOC_Os02g43760 // LOC_Os01g47180 // LOC_Os12g21500 // LOC_Os06g06230 // LOC_Os04g49730 // LOC_Os04g48820 // LOC_Os01g72520 // LOC_Os02g08370 // LOC_Os12g18200 // LOC_Os04g35100 // LOC_Os02g48840 // LOC_Os11g38630 // LOC_Os08g07840 // LOC_Os01g49900 // …
GO:0004518	F	nuclease activity	27	1496	1337	24075	1	1	// LOC_Os03g62720 // LOC_Os07g45620 // LOC_Os09g07820 // LOC_Os06g33980 // LOC_Os01g47180 // LOC_Os12g21500 // LOC_Os04g48820 // LOC_Os12g18200 // LOC_Os08g07840 // LOC_Os03g12610 // LOC_Os01g58680 // LOC_Os04g55700 // LOC_Os12g08740 // LOC_Os11g38930 // LOC_Os04g54340 // LOC_Os05g46270 // LOC_Os11g05570 // LOC_Os08g28980 // LOC_Os02g29464 // LOC_Os09g35000 // LOC_Os04g40900 // LOC_Os07g02180 // …
GO:0003682	F	chromatin binding	5	1496	913	24075	1	1	// LOC_Os03g29864 // LOC_Os01g27040 // LOC_Os07g43360 // LOC_Os11g34060 // LOC_Os01g65850
GO:0005515	F	protein binding	169	1496	2460	24075	0.1	1	// LOC_Os01g06454 // LOC_Os08g09900 // LOC_Os05g43610 // LOC_Os07g12810 // LOC_Os09g25310 // LOC_Os02g34840 // LOC_Os02g10100 // LOC_Os02g49180 // LOC_Os03g53700 // LOC_Os09g30160 // LOC_Os12g17550 // LOC_Os06g47270 // LOC_Os06g45630 // LOC_Os04g42980 // LOC_Os11g36790 // LOC_Os07g37140 // LOC_Os09g25590 // LOC_Os06g47320 // LOC_Os07g33100 // LOC_Os06g48630 // LOC_Os01g03300 // LOC_Os03g60870 // …
GO:0060089	F	molecular transducer activity	5	1496	152	24075	0.96	1	// LOC_Os06g09090 // LOC_Os06g08910 // LOC_Os02g54640 // LOC_Os02g38120 // LOC_Os10g07546
GO:0016772	F	transferase activity, transferring phosphorus-containing groups	115	1496	4781	24075	1	1	// LOC_Os04g57400 // LOC_Os12g07350 // LOC_Os01g64820 // LOC_Os02g10100 // LOC_Os10g28640 // LOC_Os07g44630 // LOC_Os12g40830 // LOC_Os05g13770 // LOC_Os03g03650 // LOC_Os01g25880 // LOC_Os06g45630 // LOC_Os04g41040 // LOC_Os01g62900 // LOC_Os04g47570 // LOC_Os06g37620 // LOC_Os11g04160 // LOC_Os06g23160 // LOC_Os01g27020 // LOC_Os07g22950 // LOC_Os05g38150 // LOC_Os02g56740 // LOC_Os07g08630 // …
GO:0003723	F	RNA binding	108	1496	3190	24075	1	1	// LOC_Os01g60260 // LOC_Os10g41440 // LOC_Os12g07350 // LOC_Os12g21500 // LOC_Os04g42010 // LOC_Os04g56670 // LOC_Os03g05980 // LOC_Os01g64090 // LOC_Os03g03930 // LOC_Os01g21180 // LOC_Os01g66560 // LOC_Os11g45590 // LOC_Os03g51510 // LOC_Os01g74030 // LOC_Os10g27470 // LOC_Os05g48510 // LOC_Os08g44450 // LOC_Os01g09750 // LOC_Os04g47380 // LOC_Os08g01840 // LOC_Os10g25110 // LOC_Os03g62314 // …
GO:0016301	F	kinase activity	77	1496	1750	24075	1	1	// LOC_Os05g41370 // LOC_Os03g49750 // LOC_Os04g57400 // LOC_Os06g47700 // LOC_Os03g50330 // LOC_Os03g46910 // LOC_Os02g10100 // LOC_Os10g28640 // LOC_Os07g44630 // LOC_Os09g36320 // LOC_Os07g44360 // LOC_Os05g13770 // LOC_Os03g63330 // LOC_Os01g25880 // LOC_Os07g20544 // LOC_Os03g53720 // LOC_Os09g29520 // LOC_Os10g02360 // LOC_Os01g73640 // LOC_Os06g45630 // LOC_Os01g66520 // LOC_Os06g18000 // …
GO:0005488	F	binding	985	1496	16823	24075	1	1	// LOC_Os01g63160 // LOC_Os12g34874 // LOC_Os12g07350 // LOC_Os01g47600 // LOC_Os09g25310 // LOC_Os02g34840 // LOC_Os02g10100 // LOC_Os03g12610 // LOC_Os04g35210 // LOC_Os12g21500 // LOC_Os02g57040 // LOC_Os05g13770 // LOC_Os03g03650 // LOC_Os04g42010 // LOC_Os04g02870 // LOC_Os09g35850 // LOC_Os06g45630 // LOC_Os04g42980 // LOC_Os03g01660 // LOC_Os11g36790 // LOC_Os10g30580 // LOC_Os11g07500 // …
GO:0005737	C	cytoplasm	221	1496	1263	24075	2.1e-39	2.8e-37	// LOC_Os09g19560 // LOC_Os01g39010 // LOC_Os04g42380 // LOC_Os01g22490 // LOC_Os12g34874 // LOC_Os08g23110 // LOC_Os07g22700 // LOC_Os11g34850 // LOC_Os11g09280 // LOC_Os05g11550 // LOC_Os03g18830 // LOC_Os12g39860 // LOC_Os05g37160 // LOC_Os01g64090 // LOC_Os08g19850 // LOC_Os01g62900 // LOC_Os06g48630 // LOC_Os01g66560 // LOC_Os05g27940 // LOC_Os06g03790 // LOC_Os03g16080 // LOC_Os01g33020 // …
GO:0005622	C	intracellular	458	1496	4116	24075	2.6e-35	1.7e-33	// LOC_Os04g42380 // LOC_Os12g34874 // LOC_Os01g47600 // LOC_Os05g41390 // LOC_Os04g42010 // LOC_Os06g46436 // LOC_Os06g37620 // LOC_Os07g07060 // LOC_Os04g16740 // LOC_Os07g41580 // LOC_Os02g16670 // LOC_Os05g38150 // LOC_Os01g01307 // LOC_Os12g37400 // LOC_Os10g03540 // LOC_Os01g63780 // LOC_Os03g45320 // LOC_Os12g38940 // LOC_Os01g37837 // LOC_Os11g01869 // LOC_Os02g40680 // LOC_Os08g12840 // …
GO:0044424	C	intracellular part	389	1496	3529	24075	2.2e-28	9.7e-27	// LOC_Os04g42380 // LOC_Os12g34874 // LOC_Os01g47600 // LOC_Os05g41390 // LOC_Os04g42010 // LOC_Os06g46436 // LOC_Os06g37620 // LOC_Os07g07060 // LOC_Os04g16740 // LOC_Os07g41580 // LOC_Os02g16670 // LOC_Os05g38150 // LOC_Os01g01307 // LOC_Os05g48510 // LOC_Os10g03540 // LOC_Os01g63780 // LOC_Os03g45320 // LOC_Os01g37837 // LOC_Os02g40680 // LOC_Os08g12840 // LOC_Os05g11710 // LOC_Os01g49010 // …
GO:0032991	C	macromolecular complex	182	1496	1207	24075	2.1e-25	6.9e-24	// LOC_Os05g09490 // LOC_Os01g39010 // LOC_Os12g31640 // LOC_Os04g42380 // LOC_Os01g22490 // LOC_Os07g22700 // LOC_Os02g01332 // LOC_Os02g56130 // LOC_Os04g42010 // LOC_Os06g06510 // LOC_Os08g13690 // LOC_Os05g01560 // LOC_Os02g12800 // LOC_Os05g37160 // LOC_Os01g64090 // LOC_Os06g48630 // LOC_Os01g66560 // LOC_Os05g27940 // LOC_Os05g19270 // LOC_Os05g41180 // LOC_Os03g10950 // LOC_Os04g16740 // …
GO:0030529	C	ribonucleoprotein complex	93	1496	438	24075	1.2e-21	3.1e-20	// LOC_Os01g39010 // LOC_Os04g42380 // LOC_Os01g22490 // LOC_Os04g42010 // LOC_Os08g13690 // LOC_Os01g64090 // LOC_Os01g66560 // LOC_Os05g27940 // LOC_Os06g03790 // LOC_Os12g03880 // LOC_Os03g51510 // LOC_Os08g42920 // LOC_Os09g32976 // LOC_Os02g39700 // LOC_Os07g33997 // LOC_Os02g18550 // LOC_Os10g03540 // LOC_Os03g28410 // LOC_Os09g31019 // LOC_Os07g26740 // LOC_Os07g38540 // LOC_Os01g25610 // …
GO:0044464	C	cell part	537	1496	5945	24075	6.9e-21	1.3e-19	// LOC_Os04g42380 // LOC_Os12g34874 // LOC_Os01g47600 // LOC_Os05g41390 // LOC_Os04g42010 // LOC_Os05g01560 // LOC_Os06g46436 // LOC_Os09g12600 // LOC_Os06g37620 // LOC_Os03g10950 // LOC_Os04g16740 // LOC_Os05g33960 // LOC_Os07g41580 // LOC_Os02g16670 // LOC_Os05g38150 // LOC_Os01g01307 // LOC_Os12g37400 // LOC_Os10g03540 // LOC_Os01g63780 // LOC_Os02g38710 // LOC_Os03g45320 // LOC_Os12g38940 // …
GO:0005623	C	cell	537	1496	5945	24075	6.9e-21	1.3e-19	// LOC_Os04g42380 // LOC_Os12g34874 // LOC_Os01g47600 // LOC_Os05g41390 // LOC_Os04g42010 // LOC_Os05g01560 // LOC_Os06g46436 // LOC_Os09g12600 // LOC_Os06g37620 // LOC_Os03g10950 // LOC_Os04g16740 // LOC_Os05g33960 // LOC_Os07g41580 // LOC_Os02g16670 // LOC_Os05g38150 // LOC_Os01g01307 // LOC_Os12g37400 // LOC_Os10g03540 // LOC_Os01g63780 // LOC_Os02g38710 // LOC_Os03g45320 // LOC_Os12g38940 // …
GO:0044444	C	cytoplasmic part	135	1496	966	24075	1.6e-16	2.6e-15	// LOC_Os01g39010 // LOC_Os04g42380 // LOC_Os01g22490 // LOC_Os01g33020 // LOC_Os07g22700 // LOC_Os11g09280 // LOC_Os08g13690 // LOC_Os01g64090 // LOC_Os06g48630 // LOC_Os01g66560 // LOC_Os05g27940 // LOC_Os06g03790 // LOC_Os03g16080 // LOC_Os03g51510 // LOC_Os08g42920 // LOC_Os09g32200 // LOC_Os07g33997 // LOC_Os02g18550 // LOC_Os08g44450 // LOC_Os03g28410 // LOC_Os09g31019 // LOC_Os07g26740 // …
GO:0005840	C	ribosome	76	1496	397	24075	9.1e-16	1.3e-14	// LOC_Os01g01060 // LOC_Os09g08890 // LOC_Os01g47660 // LOC_Os05g11710 // LOC_Os04g42380 // LOC_Os01g22490 // LOC_Os03g40180 // LOC_Os04g28180 // LOC_Os03g58050 // LOC_Os01g67134 // LOC_Os02g01332 // LOC_Os01g62210 // LOC_Os08g02400 // LOC_Os01g24690 // LOC_Os03g27260 // LOC_Os08g13690 // LOC_Os02g01560 // LOC_Os11g04070 // LOC_Os01g59950 // LOC_Os03g54890 // LOC_Os04g51630 // LOC_Os09g31019 // …
GO:0043229	C	intracellular organelle	257	1496	2859	24075	4e-09	4.7e-08	// LOC_Os06g50154 // LOC_Os08g34170 // LOC_Os04g42380 // LOC_Os01g22490 // LOC_Os01g33020 // LOC_Os01g47600 // LOC_Os04g39700 // LOC_Os07g22700 // LOC_Os01g39010 // LOC_Os11g34305 // LOC_Os05g41390 // LOC_Os09g27140 // LOC_Os05g11550 // LOC_Os04g42010 // LOC_Os06g06510 // LOC_Os08g13690 // LOC_Os08g45040 // LOC_Os03g29864 // LOC_Os06g46436 // LOC_Os01g64090 // LOC_Os04g58830 // LOC_Os01g63970 // …
GO:0043226	C	organelle	257	1496	2859	24075	4e-09	4.7e-08	// LOC_Os06g50154 // LOC_Os08g34170 // LOC_Os04g42380 // LOC_Os01g22490 // LOC_Os01g33020 // LOC_Os01g47600 // LOC_Os04g39700 // LOC_Os07g22700 // LOC_Os01g39010 // LOC_Os11g34305 // LOC_Os05g41390 // LOC_Os09g27140 // LOC_Os05g11550 // LOC_Os04g42010 // LOC_Os06g06510 // LOC_Os08g13690 // LOC_Os08g45040 // LOC_Os03g29864 // LOC_Os06g46436 // LOC_Os01g64090 // LOC_Os04g58830 // LOC_Os01g63970 // …
GO:0044428	C	nuclear part	23	1496	97	24075	4.2e-07	4.5e-06	// LOC_Os09g27140 // LOC_Os06g13670 // LOC_Os05g42300 // LOC_Os09g36890 // LOC_Os01g56550 // LOC_Os05g28190 // LOC_Os07g43540 // LOC_Os11g37080 // LOC_Os05g50360 // LOC_Os05g19270 // LOC_Os01g27040 // LOC_Os11g42420 // LOC_Os01g46020 // LOC_Os01g63780 // LOC_Os02g29464 // LOC_Os01g73890 // LOC_Os03g49210 // LOC_Os10g26280 // LOC_Os07g08729 // LOC_Os02g50630 // LOC_Os07g12320 // LOC_Os01g14950 // …
GO:0043233	C	organelle lumen	15	1496	70	24075	0.00011	0.001	// LOC_Os09g27140 // LOC_Os11g37080 // LOC_Os06g13670 // LOC_Os01g46020 // LOC_Os01g73890 // LOC_Os08g34130 // LOC_Os02g50630 // LOC_Os01g56550 // LOC_Os06g03790 // LOC_Os07g12320 // LOC_Os05g42300 // LOC_Os01g05050 // LOC_Os09g36890 // LOC_Os04g33950 // LOC_Os03g49210
GO:0070013	C	intracellular organelle lumen	15	1496	70	24075	0.00011	0.001	// LOC_Os09g27140 // LOC_Os11g37080 // LOC_Os06g13670 // LOC_Os01g46020 // LOC_Os01g73890 // LOC_Os08g34130 // LOC_Os02g50630 // LOC_Os01g56550 // LOC_Os06g03790 // LOC_Os07g12320 // LOC_Os05g42300 // LOC_Os01g05050 // LOC_Os09g36890 // LOC_Os04g33950 // LOC_Os03g49210
GO:0031974	C	membrane-enclosed lumen	16	1496	80	24075	0.00014	0.0012	// LOC_Os09g27140 // LOC_Os11g37080 // LOC_Os06g13670 // LOC_Os01g46020 // LOC_Os01g73890 // LOC_Os08g34130 // LOC_Os02g50630 // LOC_Os01g56550 // LOC_Os06g03790 // LOC_Os07g12320 // LOC_Os01g05050 // LOC_Os05g42300 // LOC_Os08g42380 // LOC_Os09g36890 // LOC_Os04g33950 // LOC_Os03g49210
GO:0031975	C	envelope	25	1496	167	24075	0.00015	0.0012	// LOC_Os01g04990 // LOC_Os09g19734 // LOC_Os07g22700 // LOC_Os05g28190 // LOC_Os02g54640 // LOC_Os07g45300 // LOC_Os03g18500 // LOC_Os03g16080 // LOC_Os03g13730 // LOC_Os05g23720 // LOC_Os11g42420 // LOC_Os01g12520 // LOC_Os05g45950 // LOC_Os01g51770 // LOC_Os09g32200 // LOC_Os01g63780 // LOC_Os03g30220 // LOC_Os06g09090 // LOC_Os06g08910 // LOC_Os02g06480 // LOC_Os08g40850 // LOC_Os01g16910 // …
GO:0031967	C	organelle envelope	22	1496	142	24075	0.00024	0.0018	// LOC_Os01g04990 // LOC_Os09g19734 // LOC_Os07g22700 // LOC_Os05g28190 // LOC_Os07g45300 // LOC_Os03g18500 // LOC_Os03g16080 // LOC_Os03g13730 // LOC_Os05g23720 // LOC_Os11g42420 // LOC_Os01g12520 // LOC_Os05g45950 // LOC_Os01g51770 // LOC_Os09g32200 // LOC_Os01g63780 // LOC_Os03g30220 // LOC_Os02g06480 // LOC_Os08g40850 // LOC_Os01g16910 // LOC_Os05g50654 // LOC_Os08g42380 // LOC_Os01g14950
GO:0031981	C	nuclear lumen	12	1496	56	24075	0.00053	0.0038	// LOC_Os09g27140 // LOC_Os11g37080 // LOC_Os06g13670 // LOC_Os01g46020 // LOC_Os01g73890 // LOC_Os09g36890 // LOC_Os02g50630 // LOC_Os01g56550 // LOC_Os07g12320 // LOC_Os05g42300 // LOC_Os04g33950 // LOC_Os03g49210
GO:0005739	C	mitochondrion	21	1496	162	24075	0.0025	0.017	// LOC_Os01g12520 // LOC_Os01g04990 // LOC_Os05g45950 // LOC_Os01g51770 // LOC_Os09g32200 // LOC_Os07g45300 // LOC_Os02g06480 // LOC_Os09g19734 // LOC_Os08g40850 // LOC_Os01g16910 // LOC_Os07g22700 // LOC_Os08g34130 // LOC_Os02g40460 // LOC_Os06g03790 // LOC_Os03g16080 // LOC_Os03g18500 // LOC_Os01g05050 // LOC_Os03g30220 // LOC_Os08g42380 // LOC_Os05g23720 // LOC_Os05g50654
GO:0005654	C	nucleoplasm	8	1496	51	24075	0.021	0.14	// LOC_Os09g27140 // LOC_Os06g13670 // LOC_Os01g46020 // LOC_Os09g36890 // LOC_Os02g50630 // LOC_Os01g73890 // LOC_Os01g56550 // LOC_Os04g33950
GO:0005829	C	cytosol	6	1496	34	24075	0.028	0.17	// LOC_Os08g34050 // LOC_Os02g48360 // LOC_Os11g36050 // LOC_Os10g26570 // LOC_Os02g14860 // LOC_Os06g22060
GO:0043231	C	intracellular membrane-bounded organelle	164	1496	2296	24075	0.04	0.24	// LOC_Os06g50154 // LOC_Os08g34170 // LOC_Os01g33020 // LOC_Os01g47600 // LOC_Os07g22700 // LOC_Os11g09280 // LOC_Os05g41390 // LOC_Os09g27140 // LOC_Os04g42010 // LOC_Os08g45040 // LOC_Os03g29864 // LOC_Os04g58830 // LOC_Os01g63970 // LOC_Os11g45590 // LOC_Os11g29380 // LOC_Os03g21530 // LOC_Os06g03790 // LOC_Os03g16080 // LOC_Os01g64820 // LOC_Os07g41580 // LOC_Os01g57890 // LOC_Os05g51640 // …
GO:0043227	C	membrane-bounded organelle	165	1496	2319	24075	0.044	0.25	// LOC_Os06g50154 // LOC_Os08g34170 // LOC_Os01g33020 // LOC_Os01g47600 // LOC_Os07g22700 // LOC_Os11g09280 // LOC_Os05g41390 // LOC_Os09g27140 // LOC_Os04g42010 // LOC_Os08g45040 // LOC_Os03g29864 // LOC_Os06g46436 // LOC_Os04g58830 // LOC_Os01g63970 // LOC_Os11g45590 // LOC_Os11g29380 // LOC_Os03g21530 // LOC_Os06g03790 // LOC_Os03g16080 // LOC_Os01g64820 // LOC_Os07g41580 // LOC_Os01g57890 // …
GO:0043232	C	intracellular non-membrane-bounded organelle	106	1496	1494	24075	0.097	0.5	// LOC_Os01g39010 // LOC_Os04g42380 // LOC_Os01g22490 // LOC_Os06g06510 // LOC_Os08g13690 // LOC_Os01g64090 // LOC_Os05g27940 // LOC_Os06g03790 // LOC_Os12g03880 // LOC_Os03g51510 // LOC_Os08g42920 // LOC_Os10g26280 // LOC_Os07g33997 // LOC_Os02g18550 // LOC_Os08g44450 // LOC_Os02g27440 // LOC_Os03g28410 // LOC_Os09g31019 // LOC_Os07g26740 // LOC_Os07g38540 // LOC_Os04g56970 // LOC_Os07g12650 // …
GO:0043228	C	non-membrane-bounded organelle	106	1496	1494	24075	0.097	0.5	// LOC_Os01g39010 // LOC_Os04g42380 // LOC_Os01g22490 // LOC_Os06g06510 // LOC_Os08g13690 // LOC_Os01g64090 // LOC_Os05g27940 // LOC_Os06g03790 // LOC_Os12g03880 // LOC_Os03g51510 // LOC_Os08g42920 // LOC_Os10g26280 // LOC_Os07g33997 // LOC_Os02g18550 // LOC_Os08g44450 // LOC_Os02g27440 // LOC_Os03g28410 // LOC_Os09g31019 // LOC_Os07g26740 // LOC_Os07g38540 // LOC_Os04g56970 // LOC_Os07g12650 // …
GO:0005783	C	endoplasmic reticulum	9	1496	123	24075	0.37	1	// LOC_Os03g29170 // LOC_Os05g06430 // LOC_Os01g01307 // LOC_Os07g10830 // LOC_Os11g09280 // LOC_Os01g23740 // LOC_Os06g50154 // LOC_Os01g04260 // LOC_Os07g07010
GO:0016020	C	membrane	105	1496	2115	24075	0.99	1	// LOC_Os12g31640 // LOC_Os02g47090 // LOC_Os07g22700 // LOC_Os10g12500 // LOC_Os01g01640 // LOC_Os05g01560 // LOC_Os08g23320 // LOC_Os03g27040 // LOC_Os06g46436 // LOC_Os09g12600 // LOC_Os06g48630 // LOC_Os07g43040 // LOC_Os03g16080 // LOC_Os04g16740 // LOC_Os03g16890 // LOC_Os05g33960 // LOC_Os06g40790 // LOC_Os09g32200 // LOC_Os08g29760 // LOC_Os01g63780 // LOC_Os09g29660 // LOC_Os02g10260 // …
GO:0044422	C	organelle part	84	1496	1521	24075	0.87	1	// LOC_Os01g01060 // LOC_Os01g04990 // LOC_Os03g54890 // LOC_Os01g12520 // LOC_Os09g19734 // LOC_Os08g06600 // LOC_Os08g34130 // LOC_Os01g56550 // LOC_Os09g27140 // LOC_Os05g28190 // LOC_Os01g62230 // LOC_Os07g08729 // LOC_Os08g41810 // LOC_Os10g26280 // LOC_Os02g53500 // LOC_Os01g51770 // LOC_Os01g49010 // LOC_Os04g51630 // LOC_Os03g29864 // LOC_Os12g07720 // LOC_Os05g50360 // LOC_Os01g65850 // …
GO:0005856	C	cytoskeleton	5	1496	71	24075	0.46	1	// LOC_Os01g43360 // LOC_Os12g03270 // LOC_Os04g56970 // LOC_Os05g15180 // LOC_Os11g35360
GO:0012505	C	endomembrane system	8	1496	104	24075	0.33	1	// LOC_Os12g31640 // LOC_Os07g07010 // LOC_Os07g10830 // LOC_Os01g63780 // LOC_Os01g63970 // LOC_Os05g28190 // LOC_Os01g14950 // LOC_Os11g42420
GO:0044446	C	intracellular organelle part	84	1496	1521	24075	0.87	1	// LOC_Os01g01060 // LOC_Os01g04990 // LOC_Os03g54890 // LOC_Os01g12520 // LOC_Os09g19734 // LOC_Os08g06600 // LOC_Os08g34130 // LOC_Os01g56550 // LOC_Os09g27140 // LOC_Os05g28190 // LOC_Os01g62230 // LOC_Os07g08729 // LOC_Os08g41810 // LOC_Os10g26280 // LOC_Os02g53500 // LOC_Os01g51770 // LOC_Os01g49010 // LOC_Os04g51630 // LOC_Os03g29864 // LOC_Os12g07720 // LOC_Os05g50360 // LOC_Os01g65850 // …
GO:0005634	C	nucleus	126	1496	1884	24075	0.22	1	// LOC_Os08g34170 // LOC_Os01g64820 // LOC_Os01g47600 // LOC_Os11g34305 // LOC_Os05g41390 // LOC_Os04g42010 // LOC_Os08g45040 // LOC_Os03g29864 // LOC_Os04g58830 // LOC_Os11g45590 // LOC_Os11g29380 // LOC_Os03g21530 // LOC_Os01g51450 // LOC_Os07g41580 // LOC_Os01g57890 // LOC_Os05g51640 // LOC_Os02g39700 // LOC_Os12g37400 // LOC_Os01g63780 // LOC_Os01g73890 // LOC_Os05g39850 // LOC_Os04g41040 // …
