# Supplementary material for: Transcriptome Analysis Reveals Photoperiod-Associated Genes Expressed in Rice Anthers
Source: Front Plant Sci. 2021 Feb 26;12:621561. doi: 10.3389/fpls.2021.621561 (PMC7953911; doi:10.3389/fpls.2021.621561)
Supplement: Supplementary file 10 [file Data_Sheet_8.XLSX]

## Sheet: Ugp
fromNode	toNode	weight	direction
LOC_Os09g38030	LOC_Os03g02740	0.326753	undirected	Hub	phospholipase D, putative, expressed
LOC_Os09g38030	LOC_Os02g31910	0.321562	undirected	Hub	potassium transporter, putative, expressed
LOC_Os09g38030	LOC_Os04g39590	0.314592	undirected	Hub	fasciclin domain containing protein, expressed
LOC_Os09g38030	LOC_Os03g27610	0.313755	undirected	Hub	patatin, putative, expressed
LOC_Os09g38030	LOC_Os08g12520	0.312332	undirected	Hub	expressed protein
LOC_Os09g38030	LOC_Os06g36240	0.310006	undirected	Hub	POEI21 - Pollen Ole e I allergen and extensin family protein precursor, expressed
LOC_Os09g38030	LOC_Os07g27750	0.309641	undirected	Hub	expressed protein
LOC_Os09g38030	LOC_Os03g12180	0.306724	undirected	Hub	MA3 domain containing protein, expressed
LOC_Os09g38030	LOC_Os08g12890	0.304656	undirected	Hub	DNA binding protein, putative, expressed
LOC_Os09g38030	LOC_Os08g23790	0.302049	undirected	Hub	polygalacturonase, putative, expressed
LOC_Os09g38030	LOC_Os11g34680	0.301292	undirected	Hub	RNA recognition motif containing protein, putative, expressed
LOC_Os09g38030	LOC_Os11g24450	0.299783	undirected	Hub	mitochondrial carrier protein, putative, expressed
LOC_Os09g38030	LOC_Os03g61410	0.299695	undirected	Hub	expressed protein
LOC_Os09g38030	LOC_Os05g40650	0.299386	undirected	Hub	ATCHX, putative, expressed
LOC_Os09g38030	LOC_Os01g46250	0.296189	undirected	Hub	lipase, putative, expressed
LOC_Os09g38030	LOC_Os10g32900	0.296086	undirected	Hub	CCT motif family protein, expressed
LOC_Os09g38030	LOC_Os08g17870	0.295768	undirected	Hub	reticulon domain containing protein, putative, expressed
LOC_Os09g38030	LOC_Os06g44660	0.295734	undirected	Hub	fasciclin-like arabinogalactan precursor protein, putative, expressed
LOC_Os09g38030	LOC_Os01g68900	0.295228	undirected	Hub	zinc finger, C3HC4 type family protein, expressed
LOC_Os09g38030	LOC_Os06g45480	0.294771	undirected	Hub	hydrolase, putative, expressed
LOC_Os09g38030	LOC_Os02g50980	0.294055	undirected	Hub	expressed protein
LOC_Os09g38030	LOC_Os10g30620	0.293302	undirected	Hub	expressed protein
LOC_Os09g38030	LOC_Os12g35690	0.292885	undirected	Hub	RALFL5 - Rapid ALkalinization Factor RALF family protein precursor, expressed
LOC_Os09g38030	LOC_Os05g51900	0.292515	undirected	Hub	expressed protein
LOC_Os09g38030	LOC_Os05g02870	0.292451	undirected	Hub	white-brown complex homolog protein, putative, expressed
LOC_Os09g38030	LOC_Os02g03510	0.292101	undirected	Hub	fibroin heavy chain precursor, putative, expressed
LOC_Os09g38030	LOC_Os03g61590	0.291977	undirected	Hub	expressed protein
LOC_Os09g38030	LOC_Os03g11050	0.291804	undirected	Hub	mannose-1-phosphate guanyltransferase, putative, expressed
LOC_Os09g38030	LOC_Os04g40874	0.291429	undirected	Hub	glucose-6-phosphate 1-dehydrogenase, cytoplasmic isoform, putative, expressed
LOC_Os09g38030	LOC_Os10g32810	0.29129	undirected	Hub	beta-amylase, putative, expressed
LOC_Os09g38030	LOC_Os06g20150	0.290747	undirected	Hub	peroxidase precursor, putative, expressed
LOC_Os09g38030	LOC_Os04g57260	0.290526	undirected	Hub	expressed protein
LOC_Os09g38030	LOC_Os09g15420	0.289975	undirected	Hub	NAD dependent epimerase/dehydratase family protein, putative, expressed
LOC_Os09g38030	LOC_Os05g40740	0.289874	undirected	Hub	monocopper oxidase, putative, expressed
LOC_Os09g38030	LOC_Os12g07874	0.289142	undirected	Hub	WD-40 repeat family protein, putative, expressed
LOC_Os09g38030	LOC_Os03g61550	0.28911	undirected	Hub	heat shock protein DnaJ, putative, expressed
LOC_Os09g38030	LOC_Os06g45190	0.289057	undirected	Hub	pollen allergen, putative, expressed
LOC_Os09g38030	LOC_Os10g30070	0.28831	undirected	Hub	sodium/calcium exchanger protein, putative, expressed
LOC_Os09g38030	LOC_Os08g04890	0.288145	undirected	Hub	OsCML32 - Calmodulin-related calcium sensor protein, expressed
LOC_Os09g38030	LOC_Os02g09540	0.287353	undirected	Hub	expressed protein
LOC_Os09g38030	LOC_Os01g51260	0.286586	undirected	Hub	MYB family transcription factor, putative, expressed
LOC_Os09g38030	LOC_Os12g23170	0.331976	undirected		Os12bglu38 - beta-glucosidase/beta-mannosidase/exoglucanase homologue, expressed
LOC_Os09g38030	LOC_Os10g22450	0.330123	undirected		inositol-3-phosphate synthase, putative, expressed
LOC_Os09g38030	LOC_Os03g44440	0.325955	undirected		cyclic nucleotide-gated ion channel, putative, expressed
LOC_Os09g38030	LOC_Os05g44760	0.321136	undirected		hexokinase, putative, expressed
LOC_Os09g38030	LOC_Os03g51990	0.320772	undirected		ACT domain containing protein, expressed
LOC_Os09g38030	LOC_Os10g39020	0.319742	undirected		fringe-related protein, putative, expressed
LOC_Os09g38030	LOC_Os04g19800	0.31956	undirected		F-box domain containing protein, expressed
LOC_Os09g38030	LOC_Os01g56764	0.319168	undirected		expressed protein
LOC_Os09g38030	LOC_Os05g51700	0.319041	undirected		nucleoside diphosphate kinase, putative, expressed
LOC_Os09g38030	LOC_Os06g50140	0.31546	undirected		endoglucanase, putative, expressed
LOC_Os09g38030	LOC_Os06g44900	0.315312	undirected		leaf senescence related protein, putative, expressed
LOC_Os09g38030	LOC_Os02g01310	0.311469	undirected		invertase/pectin methylesterase inhibitor family protein, putative, expressed
LOC_Os09g38030	LOC_Os03g36900	0.308408	undirected		expressed protein
LOC_Os09g38030	LOC_Os01g27170	0.30834	undirected		potassium transporter, putative, expressed
LOC_Os09g38030	LOC_Os04g37460	0.308248	undirected		glutamate decarboxylase, putative, expressed
LOC_Os09g38030	LOC_Os04g53330	0.306027	undirected		RNA recognition motif containing protein, putative, expressed
LOC_Os09g38030	LOC_Os03g59660	0.305811	undirected		clathrin adaptor complex small chain domain containing protein, expressed
LOC_Os09g38030	LOC_Os01g63270	0.30525	undirected		alpha-glucan phosphorylast isozyme, putative, expressed
LOC_Os09g38030	LOC_Os03g61690	0.304776	undirected		protein phosphatase 2C, putative, expressed
LOC_Os09g38030	LOC_Os12g08070	0.303166	undirected		TRAF-type zinc finger family protein, expressed
LOC_Os09g38030	LOC_Os10g40090	0.302254	undirected		expansin precursor, putative, expressed
LOC_Os09g38030	LOC_Os02g03400	0.30189	undirected		microtubule associated protein, putative, expressed
LOC_Os09g38030	LOC_Os05g40230	0.301409	undirected		vacuolar ATP synthase subunit E, putative, expressed
LOC_Os09g38030	LOC_Os11g36740	0.300257	undirected		DUF593 domain containing protein, expressed
LOC_Os09g38030	LOC_Os03g50885	0.298904	undirected		actin, putative, expressed
LOC_Os09g38030	LOC_Os01g61390	0.29864	undirected		transposon protein, putative, unclassified, expressed
LOC_Os09g38030	LOC_Os11g37560	0.298555	undirected		expressed protein
LOC_Os09g38030	LOC_Os12g31000	0.298511	undirected		pumilio-family RNA binding repeat domain containing protein, expressed
LOC_Os09g38030	LOC_Os02g35760	0.298053	undirected		STRUBBELIG-RECEPTOR FAMILY 7 precursor, putative, expressed
LOC_Os09g38030	LOC_Os01g60080	0.297635	undirected		monocopper oxidase, putative, expressed
LOC_Os09g38030	LOC_Os06g11970	0.297237	undirected		OsMADS63 - MADS-box family gene with MIKC* type-box, expressed
LOC_Os09g38030	LOC_Os10g17660	0.296671	undirected		profilin domain containing protein, expressed
LOC_Os09g38030	LOC_Os01g10900	0.296642	undirected		MRH1, putative, expressed
LOC_Os09g38030	LOC_Os02g04030	0.294809	undirected		phosphatidylinositol transfer, putative, expressed
LOC_Os09g38030	LOC_Os05g36150	0.294625	undirected		Yip1 domain containing protein, expressed
LOC_Os09g38030	LOC_Os02g42820	0.294526	undirected		OsPLIM2a - LIM domain protein, putative actin-binding protein and transcription factor, expressed
LOC_Os09g38030	LOC_Os06g40990	0.292675	undirected		expressed protein
LOC_Os09g38030	LOC_Os10g36830	0.292608	undirected		transmembrane and coiled-coil domain-containing protein 4, putative, expressed
LOC_Os09g38030	LOC_Os11g33240	0.292298	undirected		citrate synthase, putative, expressed
LOC_Os09g38030	LOC_Os03g43510	0.291941	undirected		expressed protein
LOC_Os09g38030	LOC_Os08g34780	0.291777	undirected		adenylyl cyclase-associated protein, putative, expressed
LOC_Os09g38030	LOC_Os03g48010	0.291245	undirected		exostosin, putative, expressed
LOC_Os09g38030	LOC_Os01g03510	0.290839	undirected		WD domain, G-beta repeat domain containing protein, expressed
LOC_Os09g38030	LOC_Os04g25160	0.290133	undirected		pollen allergen, putative, expressed
LOC_Os09g38030	LOC_Os02g30610	0.289869	undirected		expressed protein
LOC_Os09g38030	LOC_Os05g41010	0.289617	undirected		oxidoreductase, putative, expressed
LOC_Os09g38030	LOC_Os05g46740	0.289565	undirected		regulator of chromosome condensation, putative, expressed
LOC_Os09g38030	LOC_Os09g19550	0.289285	undirected		SNARE domain containing protein, putative, expressed
LOC_Os09g38030	LOC_Os02g51640	0.288818	undirected		expressed protein
LOC_Os09g38030	LOC_Os03g51210	0.288294	undirected		expressed protein
LOC_Os09g38030	LOC_Os04g57350	0.288252	undirected		EH domain-containing protein 1, putative, expressed
LOC_Os09g38030	LOC_Os04g57750	0.288252	undirected		plastocyanin-like domain containing protein, putative, expressed
LOC_Os09g38030	LOC_Os06g03630	0.288194	undirected		expressed protein
LOC_Os09g38030	LOC_Os06g02019	0.288091	undirected		cytochrome P450, putative, expressed
LOC_Os09g38030	LOC_Os07g30090	0.287594	undirected		actin-depolymerizing factor, putative, expressed
LOC_Os09g38030	LOC_Os03g43100	0.287477	undirected		expressed protein
LOC_Os09g38030	LOC_Os02g32970	0.286873	undirected		hydrolase, alpha/beta fold family protein, putative, expressed
LOC_Os09g38030	LOC_Os04g58380	0.286497	undirected		expressed protein
LOC_Os09g38030	LOC_Os12g30550	0.286401	undirected		protein of unknown function domain containing protein, expressed

## Sheet: CSA
fromNode	toNode	weight	direction
LOC_Os01g16810	LOC_Os03g02740	0.315382	undirected	Hub	phospholipase D, putative, expressed
LOC_Os01g16810	LOC_Os02g31910	0.314288	undirected	Hub	potassium transporter, putative, expressed
LOC_Os01g16810	LOC_Os08g12520	0.312939	undirected	Hub	expressed protein
LOC_Os01g16810	LOC_Os04g39590	0.309413	undirected	Hub	fasciclin domain containing protein, expressed
LOC_Os01g16810	LOC_Os06g36240	0.308516	undirected	Hub	POEI21 - Pollen Ole e I allergen and extensin family protein precursor, expressed
LOC_Os01g16810	LOC_Os03g27610	0.308223	undirected	Hub	patatin, putative, expressed
LOC_Os01g16810	LOC_Os07g27750	0.307573	undirected	Hub	expressed protein
LOC_Os01g16810	LOC_Os03g12180	0.307254	undirected	Hub	MA3 domain containing protein, expressed
LOC_Os01g16810	LOC_Os08g12890	0.30269	undirected	Hub	DNA binding protein, putative, expressed
LOC_Os01g16810	LOC_Os11g24450	0.30166	undirected	Hub	mitochondrial carrier protein, putative, expressed
LOC_Os01g16810	LOC_Os05g40650	0.299326	undirected	Hub	ATCHX, putative, expressed
LOC_Os01g16810	LOC_Os08g23790	0.299287	undirected	Hub	polygalacturonase, putative, expressed
LOC_Os01g16810	LOC_Os02g50980	0.297561	undirected	Hub	expressed protein
LOC_Os01g16810	LOC_Os12g35690	0.294479	undirected	Hub	RALFL5 - Rapid ALkalinization Factor RALF family protein precursor, expressed
LOC_Os01g16810	LOC_Os10g32810	0.294296	undirected	Hub	beta-amylase, putative, expressed
LOC_Os01g16810	LOC_Os06g45190	0.293616	undirected	Hub	pollen allergen, putative, expressed
LOC_Os01g16810	LOC_Os10g32900	0.293519	undirected	Hub	CCT motif family protein, expressed
LOC_Os01g16810	LOC_Os04g57260	0.293126	undirected	Hub	expressed protein
LOC_Os01g16810	LOC_Os05g40740	0.290027	undirected	Hub	monocopper oxidase, putative, expressed
LOC_Os01g16810	LOC_Os10g30070	0.289729	undirected	Hub	sodium/calcium exchanger protein, putative, expressed
LOC_Os01g16810	LOC_Os05g51900	0.289578	undirected	Hub	expressed protein
LOC_Os01g16810	LOC_Os06g45200	0.289242	undirected	Hub	group 3 pollen allergen, putative, expressed
LOC_Os01g16810	LOC_Os08g31080	0.288902	undirected	Hub	DUF260 domain containing protein, putative, expressed
LOC_Os01g16810	LOC_Os03g11050	0.288506	undirected	Hub	mannose-1-phosphate guanyltransferase, putative, expressed
LOC_Os01g16810	LOC_Os08g17870	0.28842	undirected	Hub	reticulon domain containing protein, putative, expressed
LOC_Os01g16810	LOC_Os06g20150	0.288253	undirected	Hub	peroxidase precursor, putative, expressed
LOC_Os01g16810	LOC_Os06g45480	0.287123	undirected	Hub	hydrolase, putative, expressed
LOC_Os01g16810	LOC_Os02g09540	0.286825	undirected	Hub	expressed protein
LOC_Os01g16810	LOC_Os01g46250	0.286033	undirected	Hub	lipase, putative, expressed
LOC_Os01g16810	LOC_Os09g15420	0.285741	undirected	Hub	NAD dependent epimerase/dehydratase family protein, putative, expressed
LOC_Os01g16810	LOC_Os10g30620	0.283379	undirected	Hub	expressed protein
LOC_Os01g16810	LOC_Os05g02870	0.282873	undirected	Hub	white-brown complex homolog protein, putative, expressed
LOC_Os01g16810	LOC_Os09g24020	0.281313	undirected	Hub	pollen allergen Cyn d 23, putative, expressed
LOC_Os01g16810	LOC_Os09g24140	0.280724	undirected	Hub	pollen allergen Cyn d 23, putative, expressed
LOC_Os01g16810	LOC_Os09g39950	0.280441	undirected	Hub	POEI23 - Pollen Ole e I allergen and extensin family protein precursor, expressed
LOC_Os01g16810	LOC_Os03g27900	0.2803	undirected	Hub	ZIM motif family protein, expressed
LOC_Os01g16810	LOC_Os02g48720	0.277951	undirected	Hub	mitochondrial carrier protein, putative, expressed
LOC_Os01g16810	LOC_Os12g37480	0.27723	undirected	Hub	invertase/pectin methylesterase inhibitor family protein, putative, expressed
LOC_Os01g16810	LOC_Os07g07420	0.276469	undirected	Hub	gibberellin 20 oxidase 1-B, putative, expressed
LOC_Os01g16810	LOC_Os02g44120	0.27508	undirected	Hub	ZOS2-13 - C2H2 zinc finger protein, expressed
LOC_Os01g16810	LOC_Os12g23170	0.318199	undirected		Os12bglu38 - beta-glucosidase/beta-mannosidase/exoglucanase homologue, expressed
LOC_Os01g16810	LOC_Os03g44440	0.311679	undirected		cyclic nucleotide-gated ion channel, putative, expressed
LOC_Os01g16810	LOC_Os03g51990	0.307094	undirected		ACT domain containing protein, expressed
LOC_Os01g16810	LOC_Os05g51700	0.306161	undirected		nucleoside diphosphate kinase, putative, expressed
LOC_Os01g16810	LOC_Os04g19800	0.305893	undirected		F-box domain containing protein, expressed
LOC_Os01g16810	LOC_Os05g44760	0.305854	undirected		hexokinase, putative, expressed
LOC_Os01g16810	LOC_Os02g01310	0.305778	undirected		invertase/pectin methylesterase inhibitor family protein, putative, expressed
LOC_Os01g16810	LOC_Os01g27170	0.301735	undirected		potassium transporter, putative, expressed
LOC_Os01g16810	LOC_Os12g08070	0.301589	undirected		TRAF-type zinc finger family protein, expressed
LOC_Os01g16810	LOC_Os05g40230	0.299509	undirected		vacuolar ATP synthase subunit E, putative, expressed
LOC_Os01g16810	LOC_Os03g36900	0.299123	undirected		expressed protein
LOC_Os01g16810	LOC_Os10g17660	0.297671	undirected		profilin domain containing protein, expressed
LOC_Os01g16810	LOC_Os02g35760	0.297222	undirected		STRUBBELIG-RECEPTOR FAMILY 7 precursor, putative, expressed
LOC_Os01g16810	LOC_Os02g04030	0.295443	undirected		phosphatidylinositol transfer, putative, expressed
LOC_Os01g16810	LOC_Os11g36740	0.295406	undirected		DUF593 domain containing protein, expressed
LOC_Os01g16810	LOC_Os06g50140	0.294977	undirected		endoglucanase, putative, expressed
LOC_Os01g16810	LOC_Os03g59660	0.293885	undirected		clathrin adaptor complex small chain domain containing protein, expressed
LOC_Os01g16810	LOC_Os01g60080	0.293354	undirected		monocopper oxidase, putative, expressed
LOC_Os01g16810	LOC_Os04g53330	0.291783	undirected		RNA recognition motif containing protein, putative, expressed
LOC_Os01g16810	LOC_Os01g61390	0.291695	undirected		transposon protein, putative, unclassified, expressed
LOC_Os01g16810	LOC_Os07g30090	0.290702	undirected		actin-depolymerizing factor, putative, expressed
LOC_Os01g16810	LOC_Os04g25160	0.290679	undirected		pollen allergen, putative, expressed
LOC_Os01g16810	LOC_Os03g50885	0.288841	undirected		actin, putative, expressed
LOC_Os01g16810	LOC_Os12g30550	0.288352	undirected		protein of unknown function domain containing protein, expressed
LOC_Os01g16810	LOC_Os11g37560	0.28684	undirected		expressed protein
LOC_Os01g16810	LOC_Os04g57350	0.286492	undirected		EH domain-containing protein 1, putative, expressed
LOC_Os01g16810	LOC_Os06g11970	0.286092	undirected		OsMADS63 - MADS-box family gene with MIKC* type-box, expressed
LOC_Os01g16810	LOC_Os04g59310	0.285143	undirected		phospholipase C, putative, expressed
LOC_Os01g16810	LOC_Os01g10900	0.285051	undirected		MRH1, putative, expressed
LOC_Os01g16810	LOC_Os03g51210	0.283592	undirected		expressed protein
LOC_Os01g16810	LOC_Os05g36150	0.283287	undirected		Yip1 domain containing protein, expressed
LOC_Os01g16810	LOC_Os05g40310	0.283088	undirected		expressed protein
LOC_Os01g16810	LOC_Os12g31000	0.282902	undirected		pumilio-family RNA binding repeat domain containing protein, expressed
LOC_Os01g16810	LOC_Os04g57750	0.282896	undirected		plastocyanin-like domain containing protein, putative, expressed
LOC_Os01g16810	LOC_Os01g60110	0.28253	undirected		E2F-related protein, putative, expressed
LOC_Os01g16810	LOC_Os08g34780	0.281925	undirected		adenylyl cyclase-associated protein, putative, expressed
LOC_Os01g16810	LOC_Os03g43100	0.281782	undirected		expressed protein
LOC_Os01g16810	LOC_Os08g43570	0.281774	undirected		beta-galactosidase precursor, putative, expressed
LOC_Os01g16810	LOC_Os09g19550	0.281273	undirected		SNARE domain containing protein, putative, expressed
LOC_Os01g16810	LOC_Os03g43510	0.28114	undirected		expressed protein
LOC_Os01g16810	LOC_Os10g24370	0.28051	undirected		retrotransposon, putative, centromere-specific, expressed
LOC_Os01g16810	LOC_Os04g58380	0.280138	undirected		expressed protein
LOC_Os01g16810	LOC_Os03g03270	0.280085	undirected		fringe-related protein, putative, expressed
LOC_Os01g16810	LOC_Os06g03630	0.279456	undirected		expressed protein
LOC_Os01g16810	LOC_Os03g24170	0.27931	undirected		phosphatidylinositol-4-phosphate 5-kinase, putative, expressed
LOC_Os01g16810	LOC_Os04g20420	0.278707	undirected		DNA binding protein, putative, expressed
LOC_Os01g16810	LOC_Os11g33240	0.278314	undirected		citrate synthase, putative, expressed
LOC_Os01g16810	LOC_Os10g36830	0.277606	undirected		transmembrane and coiled-coil domain-containing protein 4, putative, expressed
LOC_Os01g16810	LOC_Os06g46560	0.277055	undirected		myb-like DNA-binding domain containing protein, expressed
LOC_Os01g16810	LOC_Os05g45370	0.277004	undirected		cell cycle control protein, putative, expressed
LOC_Os01g16810	LOC_Os01g03510	0.27652	undirected		WD domain, G-beta repeat domain containing protein, expressed
LOC_Os01g16810	LOC_Os03g62210	0.275515	undirected		subtilisin N-terminal Region family protein, expressed
LOC_Os01g16810	LOC_Os01g74510	0.275257	undirected		KIP1, putative, expressed
LOC_Os01g16810	LOC_Os02g32970	0.275235	undirected		hydrolase, alpha/beta fold family protein, putative, expressed
LOC_Os01g16810	LOC_Os10g17680	0.275212	undirected		profilin domain containing protein, expressed
LOC_Os01g16810	LOC_Os11g20384	0.27503	undirected		SacI homology domain containing protein, expressed
LOC_Os01g16810	LOC_Os03g48010	0.275009	undirected		exostosin, putative, expressed
LOC_Os01g16810	LOC_Os02g51640	0.274878	undirected		expressed protein
LOC_Os01g16810	LOC_Os01g67750	0.274772	undirected		expressed protein
LOC_Os01g16810	LOC_Os01g55795	0.274765	undirected		expressed protein
